# Supplementary material for: ZC3H4 restricts non-coding transcription in human cells
Source: eLife journal article supplement (doi:10.7554/elife.67305), 2021-04-29

Figure 1 (B) –  $\alpha$ CPSF30

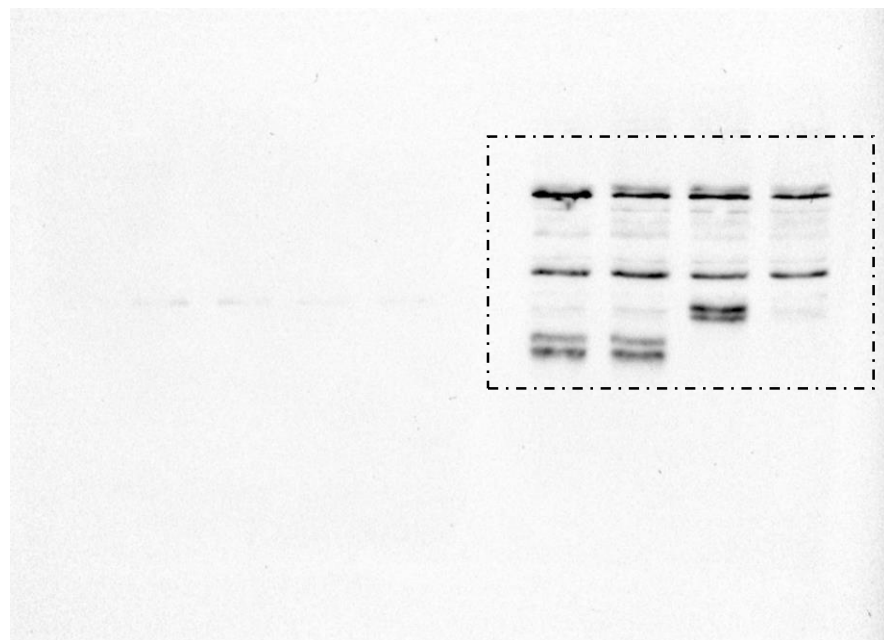

Figure 1 (E) – strep-HRP

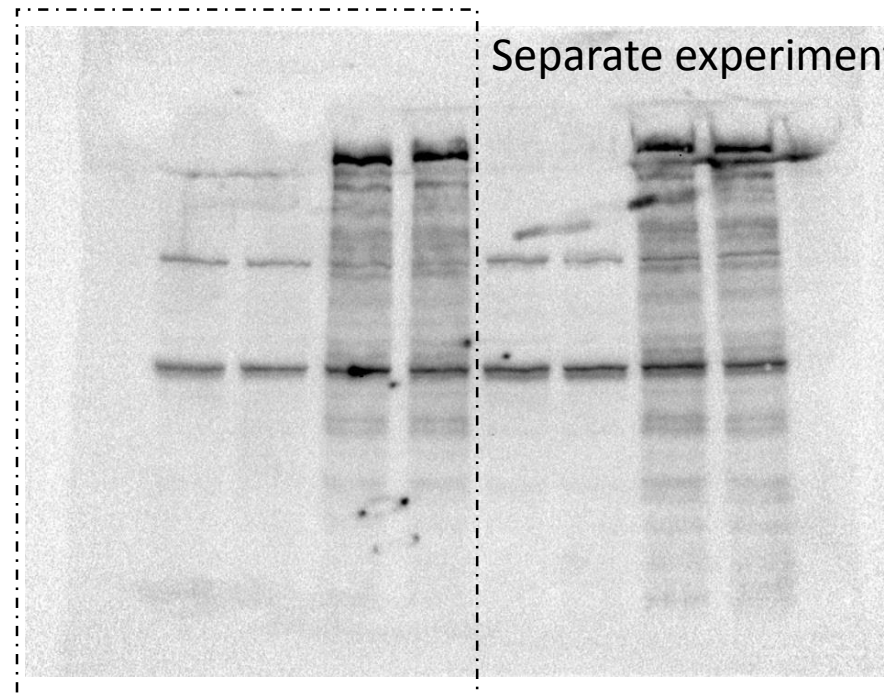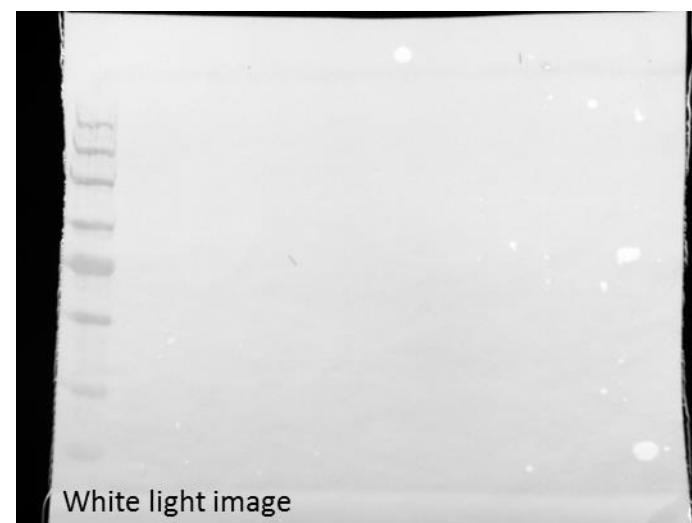

White light image

Figure 4(B) -  $\alpha$ HA (Z4) / EXOSC10

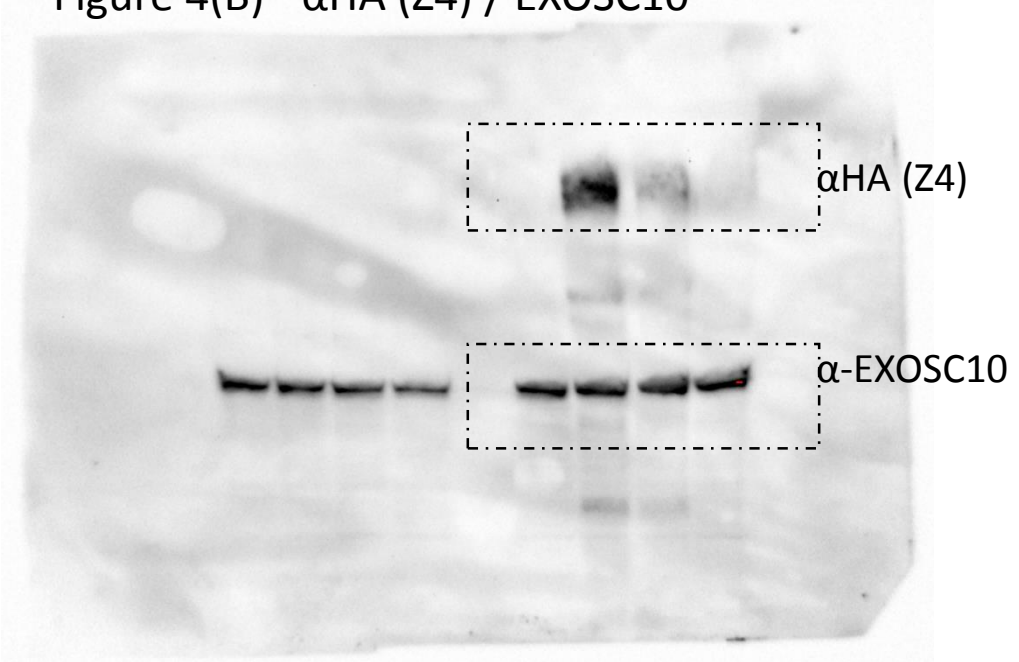

Figure 4 (B) –  $\alpha$ ZC3H4

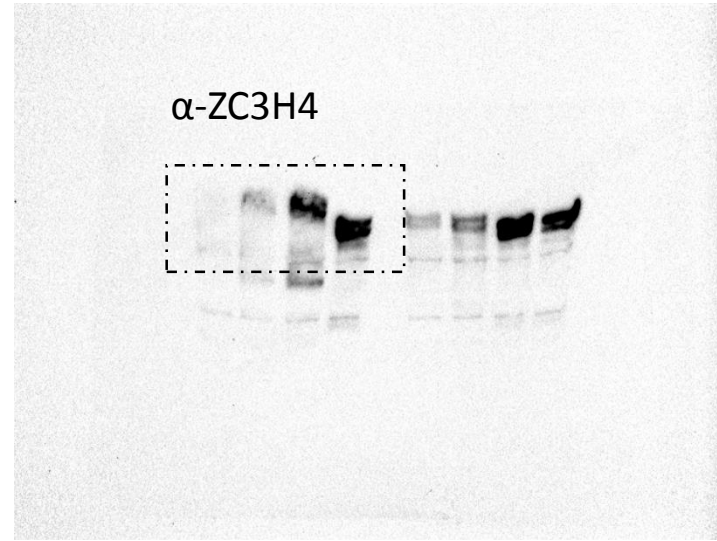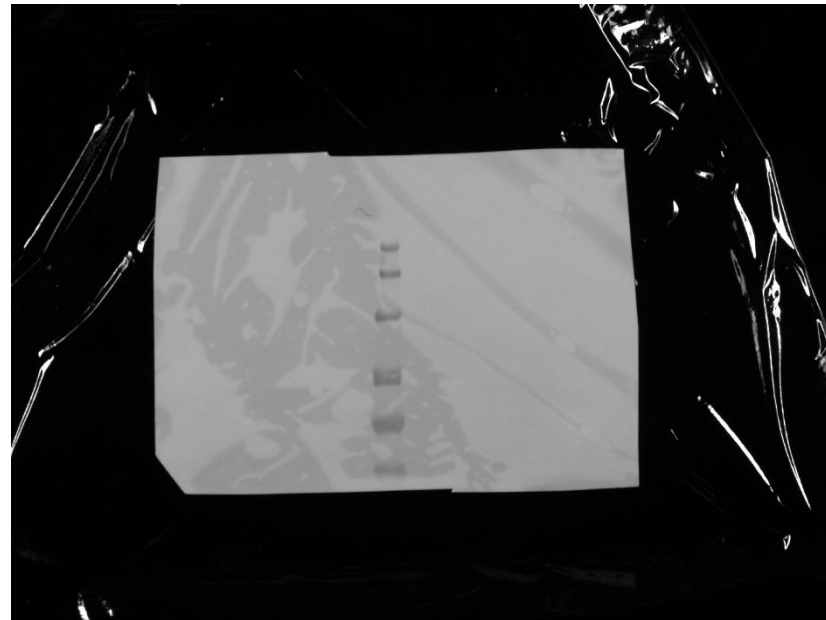

Figure 4(C) -  $\alpha$ HA (Z4)

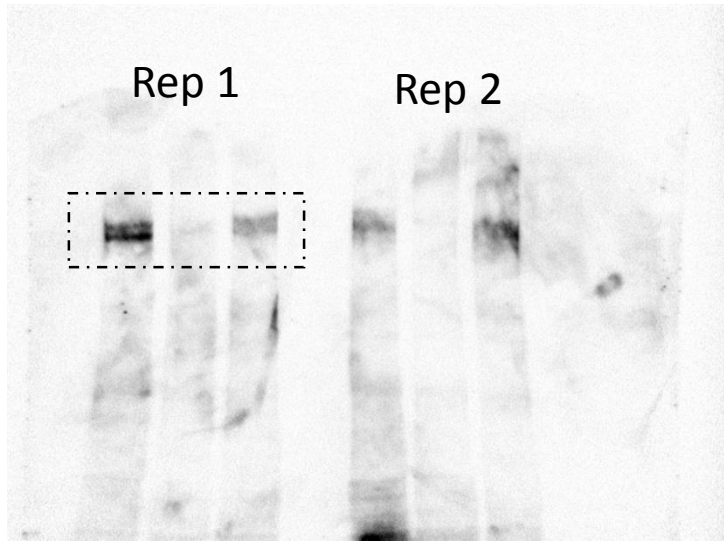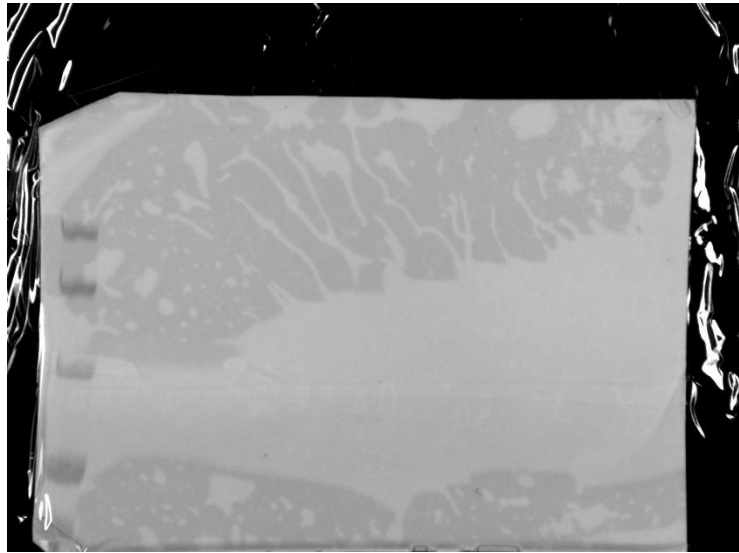

Figure 4(C) -  $\alpha$ EXOSC10

$\alpha$ HA from first panel  $\longrightarrow$

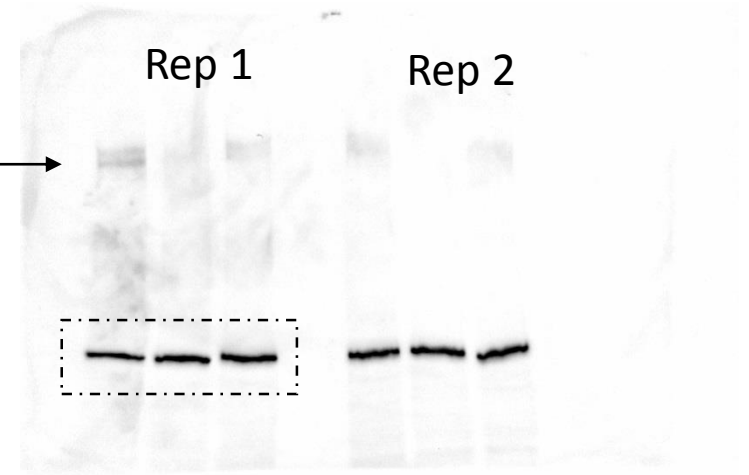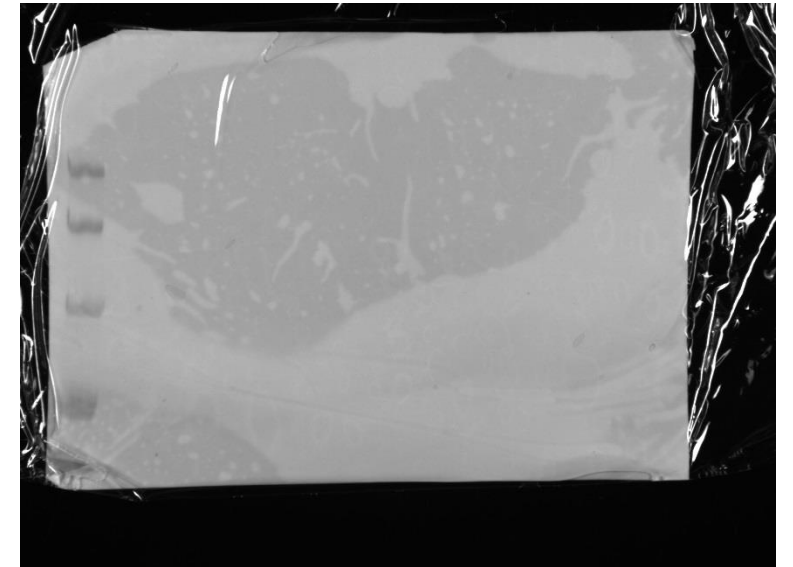

Figure 4 (F) – WDR82

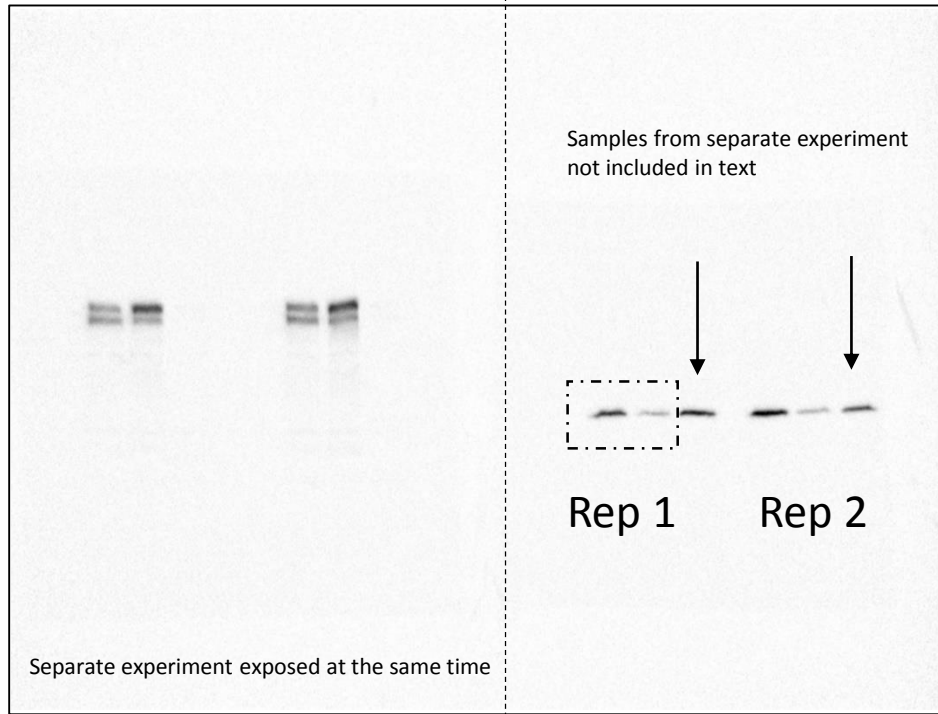

Figure 4 (F) – EXOSC10 (loading for WDR82)

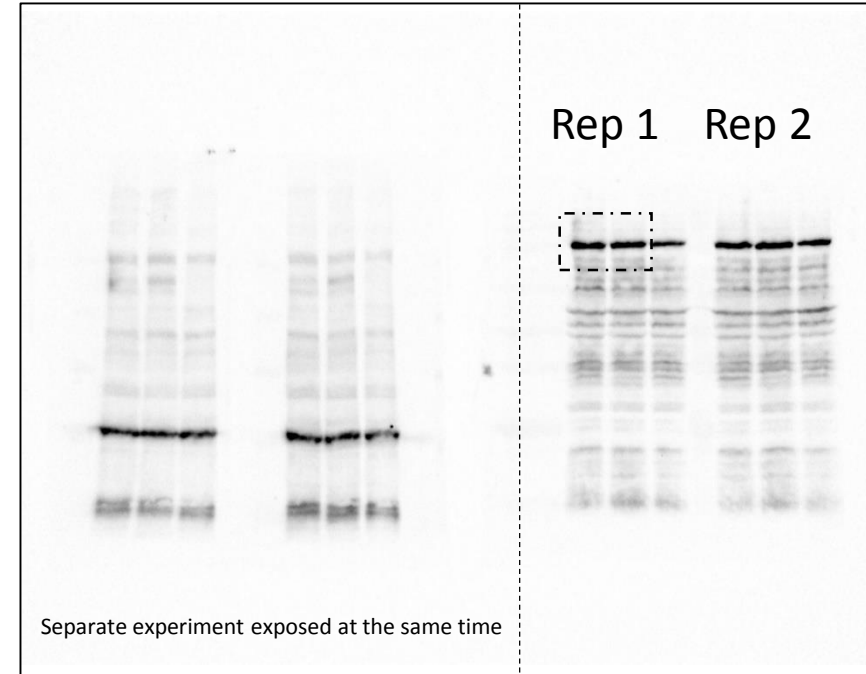

White image

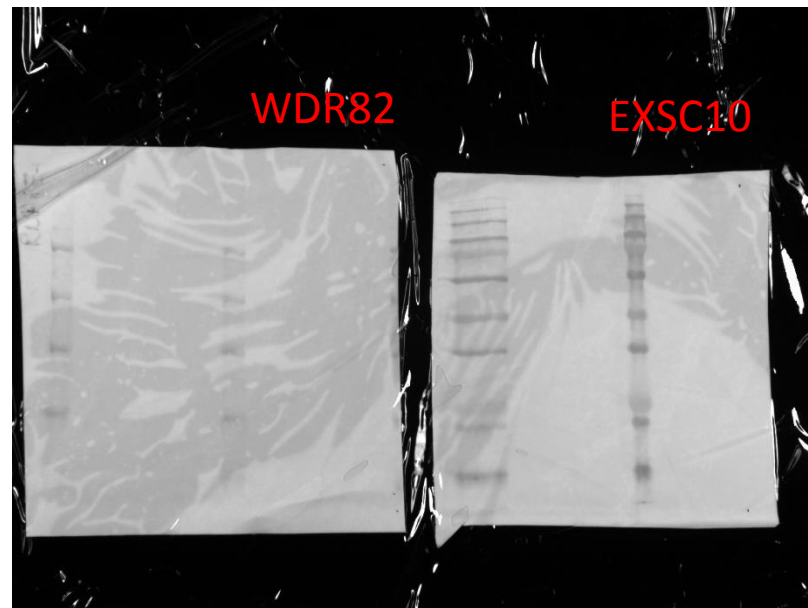

Fig 1 – fig supplement 1(B) – Pol2

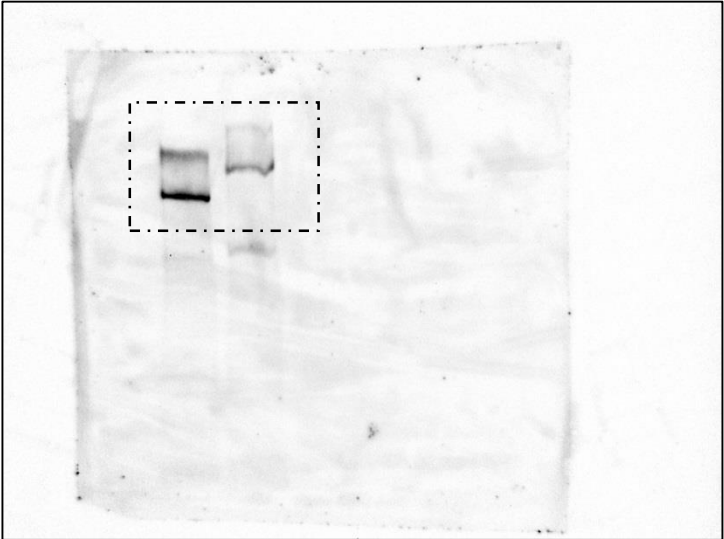

Fig 1 – fig supplement 1 (B) – white light image

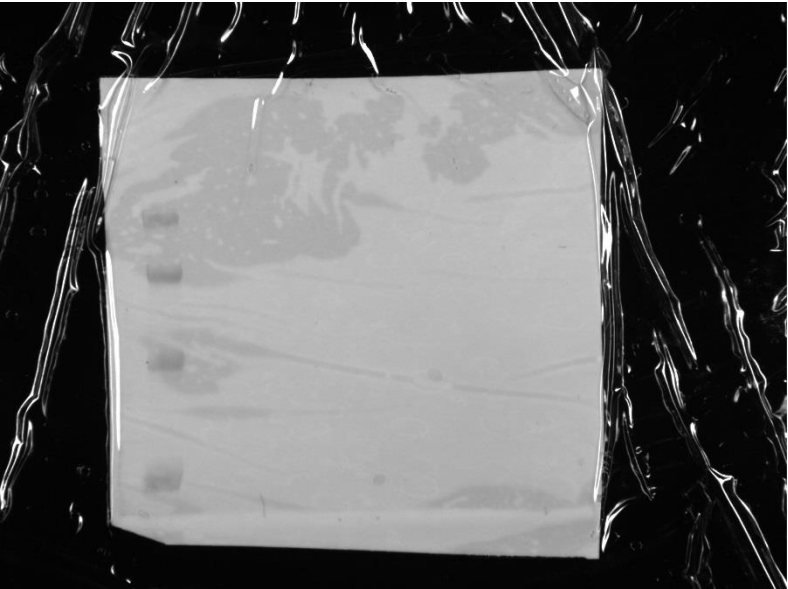

Fig 1 – fig supplement 1 (B) – EXOSC10 (loading)

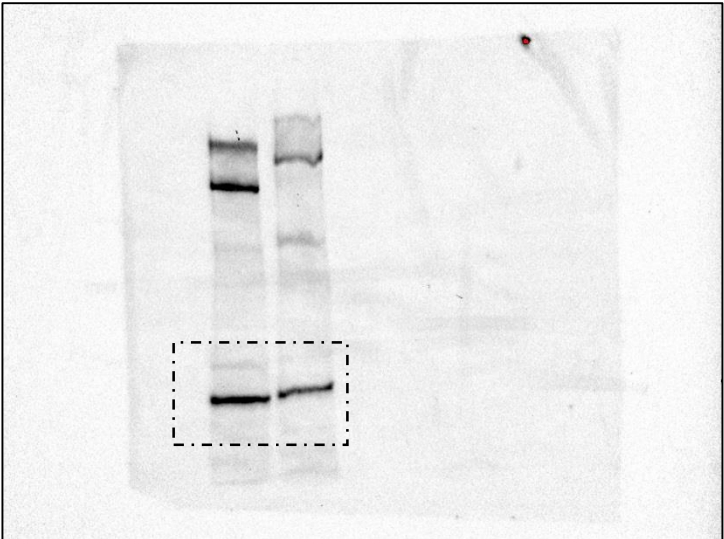

Fig 1 - fig supplement 2 (D)  $\alpha$ GFP

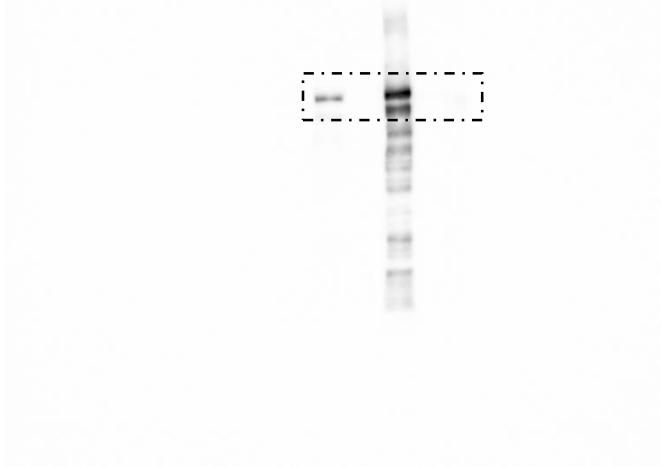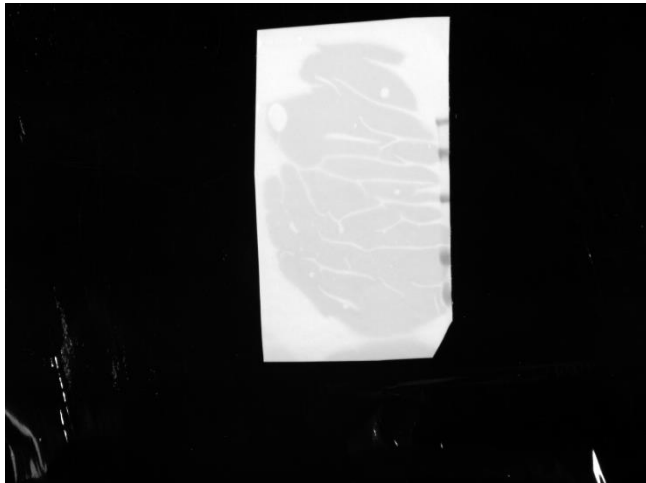

Fig 1 – fig supplement 2 (D) –  $\alpha$ WDR82

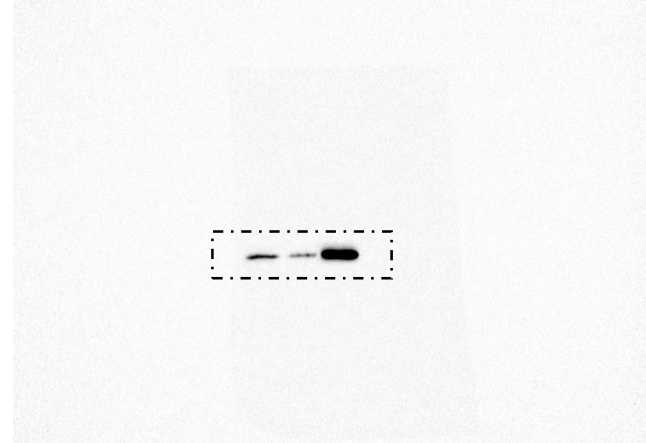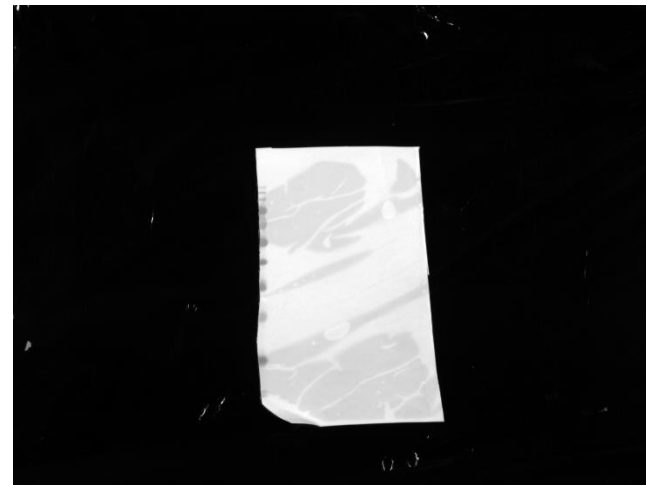

Fig 2 – fig supplement 1 (A)

$\alpha$ EXOCS10

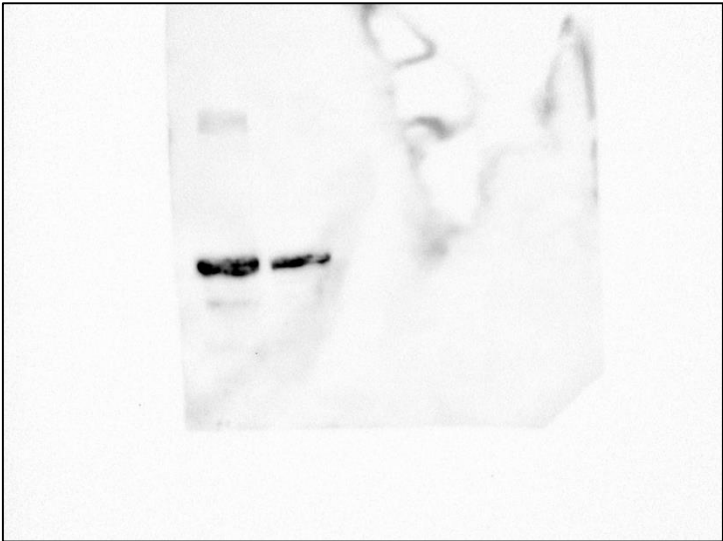

White

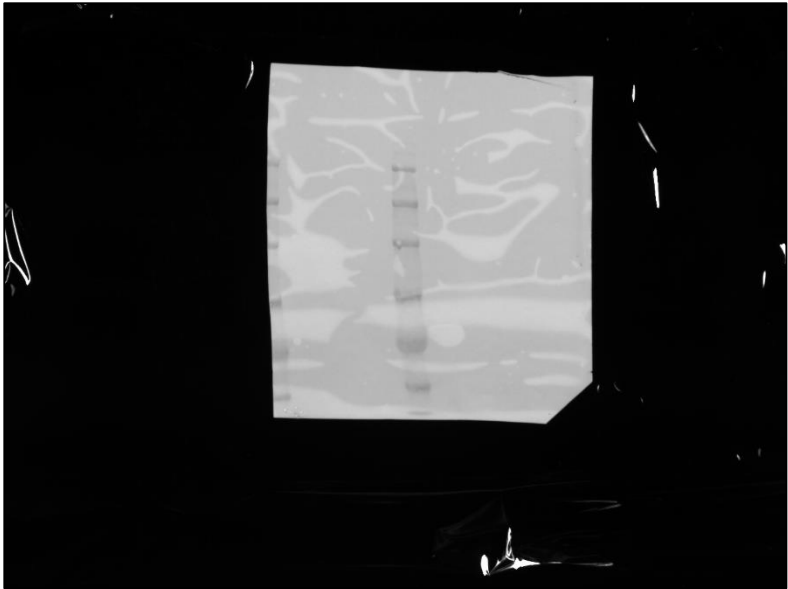

$\alpha$ ZC3H4

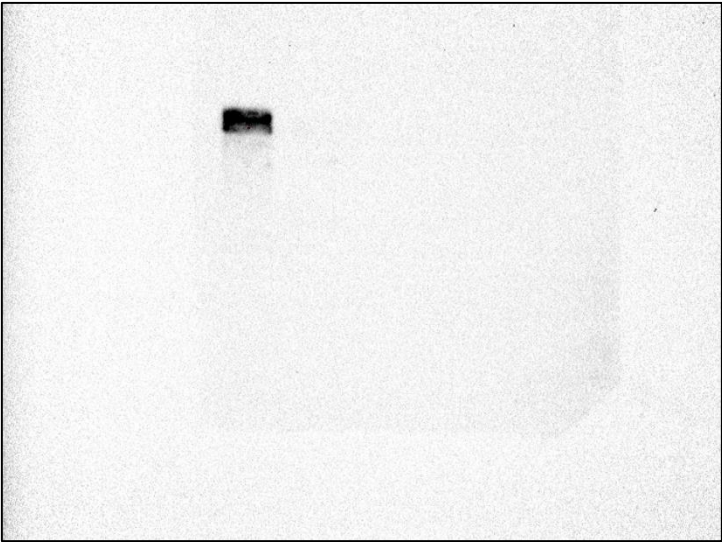

Fig 4- fig supplement 1 (C) -  $\alpha$ PNUTS

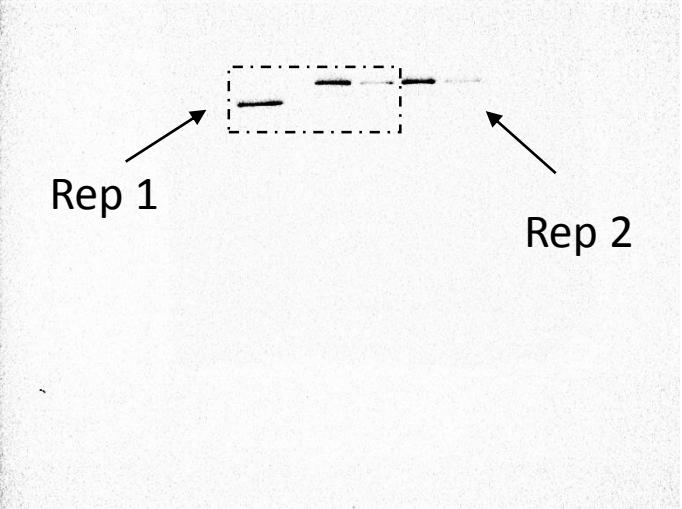

Fig 4 – fig supplement 1 (C) –  $\alpha$ WDR82

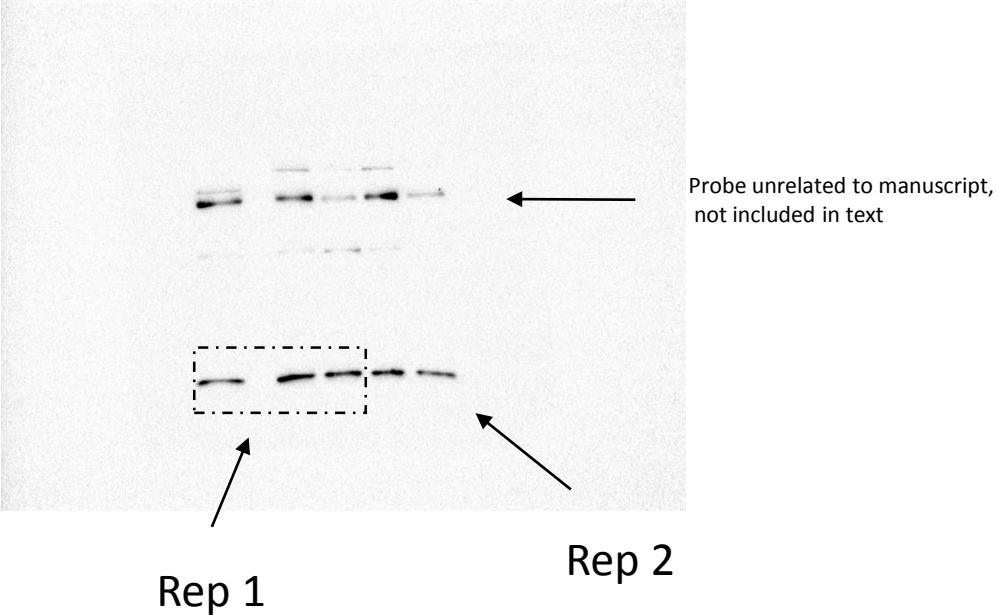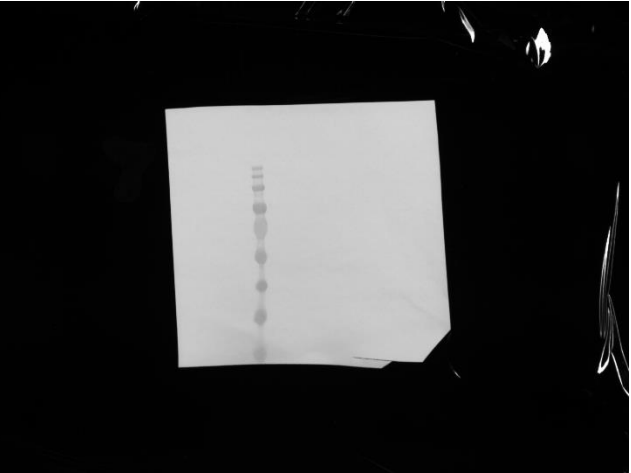



Fig 5-fig supplement 1 (A) – Upper panel

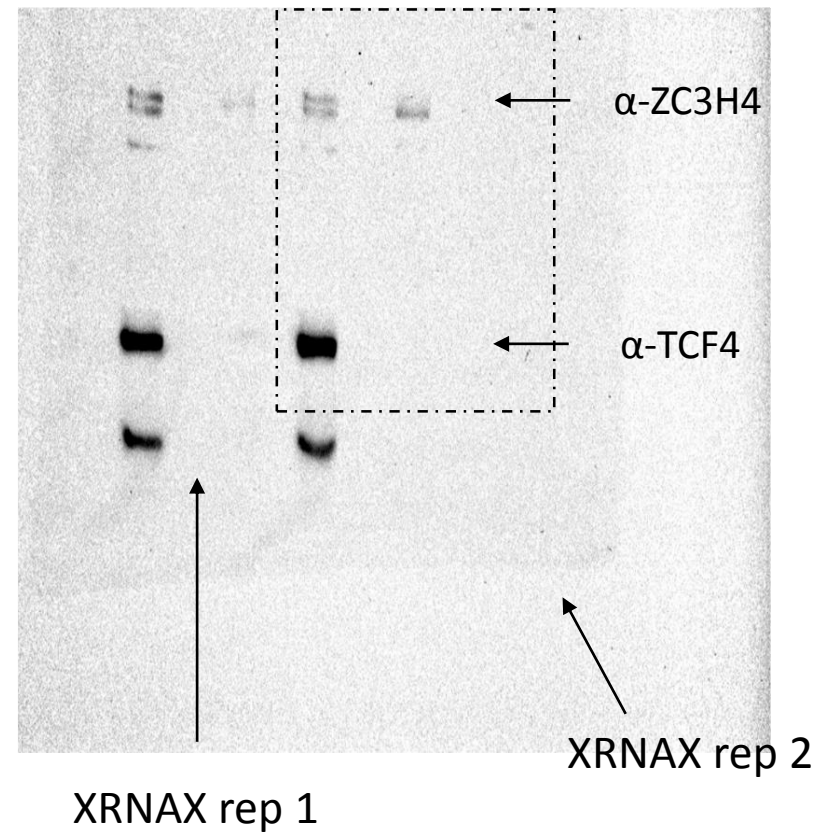

Fig5-fig supplement 1 (A)– EXOSC10

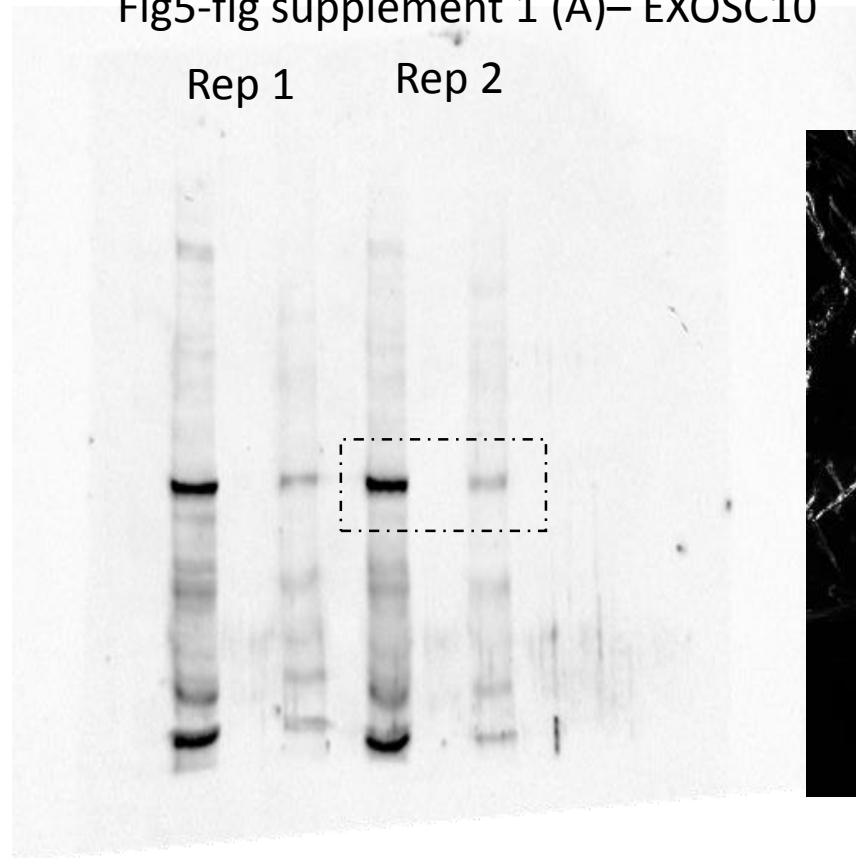

Fig 5-fig supplement 1(A)– White light image

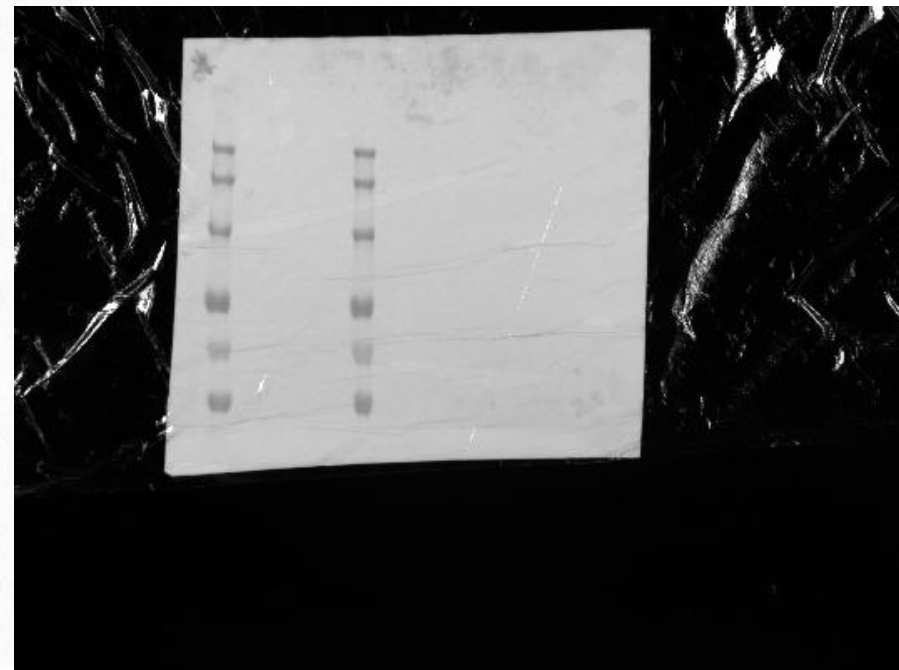

Supplement: data2 [file elife-67305-data2-v2.pdf]
