# Supplementary material for: ZC3H4 restricts non-coding transcription in human cells
Source: eLife. 2021 Apr 29;10:e67305. doi: 10.7554/eLife.67305 (PMC8137146; doi:10.7554/eLife.67305)
Supplement: Source data 1. [file elife-67305-data1.xlsx]

## Sheet: Figure 4D
	Prompts and superenhancers									Significance
										Test performed on -TMP Vs + TMP
			ITPRID5'	ITPRID3'	DLGAP	HMGA2 5'	HMGA2 3'	MSRB3
	Average	Rescue	1.28948	2.52444	6.42027	1.20618	1.64553	0.856472			ITPRID5'	ITPRID3'	DLGAP	HMGA2 5'	HMGA2 3'	MSRB3
		-TMP	6.49491	23.8098	26.4806	3.32135	3.48074	2.59371		Ttest	0.00224944	0.00567306	0.00112964	0.00277734	0.00541483	0.035969
										Test performed on -TMP Vs Vs Rescue
			ITPRID5'	ITPRID3'	DLGAP	HMGA2 5'	HMGA2 3'	MSRB3
	Stdev	Rescue	0.143813	0.927902	1.52942	0.248536	0.474152	0.19695			ITPRID5'	ITPRID3'	DLGAP	HMGA2 5'	HMGA2 3'	MSRB3
		-TMP	0.951694	9.81835	5.04651	0.353883	0.557653	0.839708		Ttest	0.000388925	0.00550446	0.00962859	0.00355969	0.0111058	0.00219544
			ITPRID5'	ITPRID3'	DLGAP	HMGA2 5'	HMGA2 3'	MSRB3
	SEM	Rescue	0.0830307	0.535725	0.883012	0.143492	0.273752	0.113709
		-TMP	0.549461	5.66863	2.9136	0.204315	0.321961	0.484806
	Samples above normalised to Spliced Actin
			Average CT
	+TMP	Rep 1	18.2067
		Rep 2	18.3867
		Rep 3	18.135
	-TMP	Rep 1	17.31
		Rep 2	17.7067
		Rep 3	17.7867
	Rescue	Rep 1	18.0167
		Rep 2	17.76
		Rep 3	18.1433

## Sheet: Figure 4E
	Spliced mRNA
		INTS11-SMASH						ZC3H4-DHFR
		NWD1 spl	pjvk spl	ENO3 spl	RNU1-1 +500			NWD1 spl	pjvk spl	ENO3 spl	RNU1-1 +500
	Average	0.898334	1.15364	0.750798	32.9769		Average	6.29563	5.81234	11.8311	0.762714
	Stdev	0.342855	0.53844	0.235895	11.2931		Stdev	1.83731	2.34322	1.45669	0.415288
	SEM	0.197947	0.310868	0.136194	6.52007		SEM	1.06077	1.35286	0.841019	0.239767
	ttest	0.584222	0.95399	0.254776	0.00481162		ttest	0.0171601	0.0233325	0.00128935	0.392997

## Sheet: Figure 4G
	Fold change
		Itprid 5'	Itprid 3'	DLGAP1	HMGA2 5'	HMGA2 3'	MSRB3
	siC+TMP	1	1	1	1	1	1
	siC-TMP	15.041	42.5151	19.8869	4.75786	8.86005	11.9416
	si82+TMP	4.00904	10.3783	3.14522	1.2092	2.48831	7.17563
	si82-TMP	14.224	57.0076	10.1652	3.103	7.26882	17.6516
	Stdev
		Itprid 5'	Itprid 3'	DLGAP1	HMGA2 5'	HMGA2 3'	MSRB3
	siC+TMP	0	0	0	0	0	0
	siC-TMP	6.23236	9.18419	7.1493	0.819668	1.81465	3.5931
	si82+TMP	0.296935	1.76108	0.428196	0.285714	0.41935	1.27975
	si82-TMP	4.4935	20.1181	3.57697	0.920563	2.18133	3.49128
	SEM
		Itprid 5'	Itprid 3'	DLGAP1	HMGA2 5'	HMGA2 3'	MSRB3
	siC+TMP	0	0	0	0	0	0
	siC-TMP	3.59825	5.3025	4.12765	0.473235	1.04769	2.07448
	si82+TMP	0.171436	1.01676	0.247219	0.164957	0.242112	0.738865
	si82-TMP	2.59432	11.6152	2.06516	0.531487	1.25939	2.01569
	Significance
		Itprid 5'	Itprid 3'	DLGAP1	HMGA2 5'	HMGA2 3'	MSRB3
	82 vs control (si82+TMP Vs siC+TMP)	0.000983724	0.00186728	0.005	0.348748	0.011	0.00260604
	Z4 Vs dual (siC-TMP Vs si82-TMP)	0.967565	0.245172	0.122688	0.465606	0.0680392	0.0821622

## Sheet: Figure 6B
		MS2-GFP	ZC3H-GFP	ZC3H4-MS2
	Average	100	91.5	8.7
	Stdev	0	24.1	4.5
	SEM	0	13.9	2.6
	Test values Vs MS2-GFP
	ZC3H4-GFP	0.532
	ZC3H4-MS2	0.0216

## Sheet: Figure 6C
		MS2 UP	BGH pA UC
	Average	13.7657	11.2227
	Stdev	7.66129	10.6453
	SEM	4.42325	6.14607
	Ttest	0.0283893	0.0488754

## Sheet: Figure 6D
	Ratio US/DS
		-IAA	+IAA
	MS2-GFP	2.17203	3.33509
	ZC3H4-GFP	5.15016	10.9775
	Stdev
		-IAA	+IAA
	MS2-GFP	0.558914	0.878296
	ZC3H4-GFP	1.20345	4.09718
	SEM
		-IAA	+IAA
	MS2-GFP	0.279457	0.439148
	ZC3H4-GFP	0.601727	2.04859
	N=4	ttest + Vs +	0.0480872
		ttest - Vs -	0.0326859

## Sheet: Figure 1 - figure supplement 1C
	HMGA2 readthrough (N=2)
	Average	145.51

## Sheet: Figure 2 - figure supplement 1A
	Spliced mRNA
		ZC3H6
	Average	-87.4134
	Stdev	29.2689
	SEM	16.8984
	Ttest	0.0012

## Sheet: Figure 4 - figure supplement 1A
		MYC		ITPRID2
		+TMP	-TMP	+TMP	-TMP
Mean	-2kb	0.58925	0.9795	0.5535	1.2525
	-4kb	0.360541	0.890747	0.237958	0.839644
	-8kb	0.0880809	0.510061	0.159893	0.779493
Stdev	-2kb	0.181684	0.326273	0.138144	0.35855
	-4kb	0.218664	0.433166	0.184481	0.0358682
	-8kb	0.0705136	0.338611	0.0796408	0.208898
SEM	-2kb	0.0908418	0.163137	0.0690718	0.179275
	-4kb	0.109332	0.216583	0.0922407	0.0179341
	-8kb	0.0352568	0.169305	0.0398204	0.104449
		Ttest, +Vs- TMP
			-2kb	-4kb	-8kb
		MYC	0.064	0.038	0.021
		ITPRID2	0.019	0.032	0.026

## Sheet: Figure 4 - figure supplement 1B
		ITPRID2 -8kb	MYC -8kb
	Average	63.0542	42.1381
	Stdev	15.1541	29.6864
	SEM	8.74925	17.1394
	ttest	0.00150438	0.0179819

[truncated: 4 more sheets: Figure 4 - figure supplement 1D, Figure 4 - figure supplement 1E, Figure 6 - figure supplement 1A, Figure 6 - figure supplement 1B]
