# Supplementary material for: ZC3H4 restricts non-coding transcription in human cells
Source: eLife. 2021 Apr 29;10:e67305. doi: 10.7554/eLife.67305 (PMC8137146; doi:10.7554/eLife.67305)
Supplement: Supplementary file 1. [file elife-67305-supp1.xlsx]

## Sheet: Proteins
	Proteins that are present in Figure 1F			Underlying MS data from Figure 1F. Proteins that have an average abundance ratio of < 0.7 (see materials and methods) are coloured, green or purple proteins are reported in Figure 1F, others were excluded for stated reasons
	Contaminant or fusion proteins
	Proteins that were excluded based on FDR or low total peptide count (<5)
	Proteins that are known background in biotin ligase experiments
	ZC3H4 and ZC3H6
Protein FDR Confidence	Accession	Description	Contaminant	Human	Coverage	# Peptides	# PSMs	# Unique Peptides	# AAs	MW [kDa]	Found in Sample: [S1] F1: 126, Sample, Rep1 Neg	Found in Sample: [S2] F1: 127, Sample, Rep1 IAA	Found in Sample: [S3] F1: 128, Sample, Rep2 Neg	Found in Sample: [S4] F1: 129, Sample, Rep2 IAA	Found in Sample: [S5] F1: 130, Sample, Rep3 Neg	Found in Sample: [S6] F1: 131, Sample, Rep3 IAA	Modifications	Abundance Ratio: (Rep1 IAA) / (Rep1 Neg)	Abundance Ratio: (Rep2 IAA) / (Rep2 Neg)	Abundance Ratio: (Rep3 IAA) / (Rep3 Neg)	Average	Abundance: F1: 126, Sample, Rep1 Neg	Abundance: F1: 127, Sample, Rep1 IAA	Abundance: F1: 128, Sample, Rep2 Neg	Abundance: F1: 129, Sample, Rep2 IAA	Abundance: F1: 130, Sample, Rep3 Neg	Abundance: F1: 131, Sample, Rep3 IAA	Abundances Count: F1: 126, Sample, Rep1 Neg	Abundances Count: F1: 127, Sample, Rep1 IAA	Abundances Count: F1: 128, Sample, Rep2 Neg	Abundances Count: F1: 129, Sample, Rep2 IAA	Abundances Count: F1: 130, Sample, Rep3 Neg	Abundances Count: F1: 131, Sample, Rep3 IAA	Score Sequest HT
High	O95639	Cleavage and polyadenylation specificity factor subunit 4 OS=Homo sapiens OX=9606 GN=CPSF4 PE=1 SV=1	FALSE	TRUE	34.9442	7	9	7	269	30.2	High	High	High	High	High	High		0.141	0.259	0.13	0.176667	242.4	34.2	175.5	45.5	307.4	39.9	6	6	6	6	6	6	25.33
High	O76013	Keratin, type I cuticular Ha6 OS=Homo sapiens OX=9606 GN=KRT36 PE=2 SV=1	TRUE	TRUE	8.35118	4	6	2	467	52.2	High	High	High	High	High	High		0.054	0.01	0.833	0.299	204.1	11	1.2		1.8	1.5	1	1	1		1	1	15.86
High	Q6UN15	Pre-mRNA 3'-end-processing factor FIP1 OS=Homo sapiens OX=9606 GN=FIP1L1 PE=1 SV=1	FALSE	TRUE	24.0741	11	17	11	594	66.5	High	High	High	High	High	High		0.302	0.526	0.186	0.338	283.3	85.4	198	104.2	389	72.5	5	5	5	5	5	5	57.81
High	A1A4E9	Keratin 13, isoform CRA_a OS=Homo sapiens OX=9606 GN=KRT13 PE=1 SV=1	FALSE	TRUE	29.476	16	39	8	458	49.6	High	High	High	High	High	High		0.122	0.041	0.879	0.347333	335	40.9	954.4	39.2	65.5	57.6	7	7	7	7	7	7	92.1
High	A0A024R6H0	Cleavage and polyadenylation specificity factor subunit 2 OS=Homo sapiens OX=9606 GN=CPSF2 PE=3 SV=1	FALSE	TRUE	12.6598	8	9	8	782	88.4	High	High	High	High	High	High		0.449	0.742	0.38	0.523667	102.8	46.1	75.3	55.9	132.6	50.4	3	3	3	3	3	3	25.69
High	P19013	Keratin, type II cytoskeletal 4 OS=Homo sapiens GN=KRT4 PE=1 SV=4	TRUE	TRUE	20.412	11	21	6	534	57.3	High	High	High	High	High	High		1.06	0.076	0.439	0.525	31.5	33.4	629.4	47.6	44	19.3	5	5	6	5	5	3	55.82
Medium	A8K761	NADH dehydrogenase (Ubiquinone) 1 beta subcomplex, 10, 22kDa, isoform CRA_b OS=Homo sapiens OX=9606 GN=NDUFB10 PE=2 SV=1	FALSE	TRUE	8.13953	1	1	1	172	20.8	High	High	High	High	High	High		0.492	0.724	0.479	0.565	15.7	7.7	11.6	8.4	14.4	6.9	1	1	1	1	1	1	2.43
High	A0A024R9Z8	Aryl hydrocarbon receptor, isoform CRA_a OS=Homo sapiens OX=9606 GN=AHR PE=4 SV=1	FALSE	TRUE	2.59434	2	2	2	848	96.1	High	High	High	High	High	High		0.601	0.767	0.365	0.577667	46.9	28.2	40.8	31.3	59.7	21.8	2	2	2	2	2	2	5.14
Medium	Q8IVT2	Mitotic interactor and substrate of PLK1 OS=Homo sapiens OX=9606 GN=MISP PE=1 SV=1	FALSE	TRUE	1.1782	1	1	1	679	75.3	High	High	High	High	High	High		0.34	1.115	0.313	0.589333	11.5	3.9	10.2	11.4	22.7	7.1	1	1	1	1	1	1	0
High	J3KPP4	Cisplatin resistance-associated overexpressed protein, isoform CRA_b OS=Homo sapiens OX=9606 GN=LUC7L3 PE=1 SV=1	FALSE	TRUE	3.06748	2	2	2	489	58.2	High	High	High	High	High	High		0.517	0.567	0.7	0.594667	23.1	11.9	14.7	8.3	22.7	15.9	1	1	1	1	1	1	2.15
Medium	Q86Y22	Collagen alpha-1(XXIII) chain OS=Homo sapiens OX=9606 GN=COL23A1 PE=1 SV=1	FALSE	TRUE	2.22222	2	2	1	540	51.9	Medium	Medium	Medium	Medium	Medium	Medium		0.585	0.689	0.527	0.600333	16.8	9.8	21.5	14.8	18.2	9.6	1	1	1	1	1	1	3.79
High	P43003	Excitatory amino acid transporter 1 OS=Homo sapiens OX=9606 GN=SLC1A3 PE=1 SV=1	FALSE	TRUE	5.16605	2	2	2	542	59.5	High	High	High	High	High	High		0.701	0.719	0.389	0.603	18	12.6	19.9	14.3	27.5	10.7	1	1	1	1	1	1	5.09
High	Q15363	Transmembrane emp24 domain-containing protein 2 OS=Homo sapiens OX=9606 GN=TMED2 PE=1 SV=1	FALSE	TRUE	8.95522	2	2	2	201	22.7	High	High	High	High	High	High		0.715	0.551	0.553	0.606333	13.2	9.4	15.6	8.6	18.8	10.4	1	1	1	1	1	1	5.19
High	Q13501	Sequestosome-1 OS=Homo sapiens OX=9606 GN=SQSTM1 PE=1 SV=1	FALSE	TRUE	7.5	3	4	3	440	47.7	High	High	High	High	High	High		0.468	0.748	0.614	0.61	14.8	6.9	12.7	9.5	12.7	7.8	1	1	1	1	1	1	8.53
Medium	P06703	Protein S100-A6 OS=Homo sapiens OX=9606 GN=S100A6 PE=1 SV=1	FALSE	TRUE	8.88889	1	1	1	90	10.2	High	High	High	High	High	High		0.59	0.662	0.611	0.621	27.4	16.2	34.7	23	33.7	20.6	1	1	1	1	1	1	2.06
High	Q9C0J8	pre-mRNA 3' end processing protein WDR33 OS=Homo sapiens OX=9606 GN=WDR33 PE=1 SV=2	FALSE	TRUE	21.482	24	28	23	1336	145.8	High	High	High	High	High	High		0.567	0.904	0.399	0.623333	737.3	418.3	579	523.6	1032.9	412.5	19	19	19	19	19	19	59.41
High	Q9UPT8	Zinc finger CCCH domain-containing protein 4 OS=Homo sapiens OX=9606 GN=ZC3H4 PE=1 SV=3	FALSE	TRUE	21.5656	19	29	19	1303	140.2	High	High	High	High	High	High		0.552	0.906	0.414	0.624	702.2	387.8	524.9	475.6	923.8	382	16	16	16	16	16	16	76.1
High	E5KMI6	Lon protease homolog, mitochondrial OS=Homo sapiens OX=9606 GN=LONP1 PE=3 SV=1	FALSE	TRUE	3.85819	4	4	4	959	106.4	High	High	High	High	High	High		0.57	0.853	0.461	0.628	29.1	16.6	23.9	20.4	30.6	14.1	2	2	2	2	2	2	8.37
High	W0S1J7	PJA2/FER fusion protein OS=Homo sapiens OX=9606 GN=Pe7Fe14 PE=2 SV=1	FALSE	TRUE	2.68065	3	3	2	858	96.2	Medium	Medium	Medium	Medium	Medium	Medium		0.303	1.062	0.521	0.628667	100.5	30.4	28.4	30.1	46.8	24.4	2	2	2	2	2	2	4.25
High	A0A024R305	Ubiquitin carboxyl-terminal hydrolase OS=Homo sapiens OX=9606 GN=BAP1 PE=3 SV=1	FALSE	TRUE	1.50892	1	1	1	729	80.3	High	High	High	High	High	High		0.571	0.893	0.472	0.645333	22.6	12.9	17.4	15.5	29	13.7	1	1	1	1	1	1	2.45
High	Q13546	Receptor-interacting serine/threonine-protein kinase 1 OS=Homo sapiens OX=9606 GN=RIPK1 PE=1 SV=3	FALSE	TRUE	2.3845	1	1	1	671	75.9	High	High	High	High	High	High		0.711	0.635	0.593	0.646333	12.7	9.1	11.8	7.5	14.5	8.6	1	1	1	1	1	1	2.5
Medium	J3KQ48	Peptidyl-tRNA hydrolase 2, mitochondrial OS=Homo sapiens OX=9606 GN=PTRH2 PE=1 SV=1	FALSE	TRUE	7.77778	1	1	1	180	19.3	High	High	High	High	High	High		0.624	0.766	0.562	0.650667	10.3	6.4	12.1	9.3	16.9	9.5	1	1	1	1	1	1	2.14
High	A0A0S2Z3F2	V-raf murine sarcoma 3611 viral oncogene-like protein isoform 2 (Fragment) OS=Homo sapiens OX=9606 GN=ARAF PE=2 SV=1	FALSE	TRUE	2.78232	2	2	1	611	68	High	High	High	High	High	High		0.684	0.747	0.527	0.652667	15.1	10.3	15	11.2	16.9	8.9	1	1	1	1	1	1	4.02
High	A0A1U9X8J5	SLC39A7 OS=Homo sapiens OX=9606 PE=4 SV=1	FALSE	TRUE	2.77186	1	1	1	469	50.2	High	High	High	High	High	High		0.664	0.733	0.562	0.653	13	8.6	12.4	9.1	15.3	8.6	1	1	1	1	1	1	2.92
Medium	A8K9K0	cDNA FLJ78032, highly similar to Homo sapiens haploid germ cell-specific nuclear protein kinase (GSG2) mRNA OS=Homo sapiens OX=9606 PE=2 SV=1	FALSE	TRUE	1.12782	1	1	1	798	88.5	High	High	High	High	High	High		0.648	0.722	0.597	0.655667	52.1	33.8	47	33.9	67.2	40.1	1	1	1	1	1	1	0
High	P61129	Zinc finger CCCH domain-containing protein 6 OS=Homo sapiens OX=9606 GN=ZC3H6 PE=1 SV=2	FALSE	TRUE	16.6526	14	14	14	1189	131.6	High	High	High	High	High	High		0.596	0.948	0.425	0.656333	421.8	251.3	323.9	307	566.2	240.7	13	13	13	13	13	13	33.11
High	O00483	Cytochrome c oxidase subunit NDUFA4 OS=Homo sapiens OX=9606 GN=NDUFA4 PE=1 SV=1	FALSE	TRUE	27.1605	2	3	2	81	9.4	High	High	High	High	High	High		0.685	0.699	0.585	0.656333	44.3	30.3	35.6	24.9	48.9	28.6	2	2	2	2	2	2	10.36
High	D7PBN3	ESRP1/RAF1 fusion protein OS=Homo sapiens OX=9606 PE=2 SV=1	FALSE	TRUE	5.84354	6	7	5	1061	118.5	High	High	High	High	High	High		0.572	0.811	0.596	0.659667	40.8	23.4	23.4	19	39.6	23.6	2	2	2	2	2	2	16.09
Medium	P62269	40S ribosomal protein S18 OS=Homo sapiens OX=9606 GN=RPS18 PE=1 SV=3	FALSE	TRUE	5.92105	1	1	1	152	17.7	High	High	High	High	High	High		0.533	0.774	0.675	0.660667	14.3	7.6	15.5	12	16.6	11.2	1	1	1	1	1	1	2.24
High	Q9Y5J1	U3 small nucleolar RNA-associated protein 18 homolog OS=Homo sapiens OX=9606 GN=UTP18 PE=1 SV=3	FALSE	TRUE	4.31655	2	3	2	556	62	High	High	High	High	High	High		0.725	0.656	0.603	0.661333	14.8	10.7	12.2	8	15.6	9.4	1	1	1	1	1	1	7.64
High	O94763	Unconventional prefoldin RPB5 interactor 1 OS=Homo sapiens OX=9606 GN=URI1 PE=1 SV=3	FALSE	TRUE	13.271	6	7	6	535	59.8	High	High	High	High	High	High		0.664	0.862	0.479	0.668333	66.8	44.3	53.5	46.1	82.7	39.6	2	2	2	2	2	2	18.66
High	O43502	DNA repair protein RAD51 homolog 3 OS=Homo sapiens OX=9606 GN=RAD51C PE=1 SV=1	FALSE	TRUE	7.97872	3	3	3	376	42.2	High	High	High	High	High	High		0.616	0.723	0.672	0.670333	29.6	18.2	23.1	16.7	29.9	20.1	1	1	1	1	1	1	6.95
High	Q5SRD1	Putative mitochondrial import inner membrane translocase subunit Tim23B OS=Homo sapiens OX=9606 GN=TIMM23B PE=5 SV=2	FALSE	TRUE	3.89105	1	1	1	257	28	High	High	High	High	High	High		0.802	0.648	0.564	0.671333	12.5	10.1	11.4	7.4	16.3	9.2	1	1	1	1	1	1	2.56
High	E9PR17	CD59 glycoprotein OS=Homo sapiens OX=9606 PE=1 SV=1	FALSE	TRUE	15.3846	2	2	2	130	14.5	High	High	High	High	High	High		0.571	0.805	0.644	0.673333	20	11.4	15.3	12.3	22.2	14.3	1	1	1	1	1	1	5.1
High	P84090	Enhancer of rudimentary homolog OS=Homo sapiens OX=9606 GN=ERH PE=1 SV=1	FALSE	TRUE	23.0769	3	3	3	104	12.3	High	High	High	High	High	High		0.708	0.927	0.385	0.673333	16.1	11.4	16.4	15.2	26.5	10.2	1	1	1	1	1	1	6.97
High	P54709	Sodium/potassium-transporting ATPase subunit beta-3 OS=Homo sapiens OX=9606 GN=ATP1B3 PE=1 SV=1	FALSE	TRUE	7.8853	2	2	2	279	31.5	High	High	High	High	High	High		0.827	0.71	0.485	0.674	19.5	16.1	18.9	13.4	26.4	12.8	1	1	1	1	1	1	5.08
High	P62330	ADP-ribosylation factor 6 OS=Homo sapiens OX=9606 GN=ARF6 PE=1 SV=2	FALSE	TRUE	24	4	5	3	175	20.1	High	High	High	High	High	High		0.787	0.736	0.5	0.674333	143.4	112.8	130.5	96	207	103.5	3	3	3	3	3	3	13.84
High	A8K132	cDNA FLJ75476, highly similar to Homo sapiens glutaminase (GLS), mRNA OS=Homo sapiens OX=9606 PE=2 SV=1	FALSE	TRUE	2.69058	2	3	2	669	73.5	High	High	High	High	High	High		0.84	0.759	0.424	0.674333	12.4	10.4	12.1	9.2	17.2	7.3	1	1	1	1	1	1	7.64
High	Q09666	Neuroblast differentiation-associated protein AHNAK OS=Homo sapiens OX=9606 GN=AHNAK PE=1 SV=2	FALSE	TRUE	39.4058	97	122	97	5890	628.7	High	High	High	High	High	High		0.488	1.057	0.479	0.674667	3125.9	1524.8	2085.1	2203.7	3554.7	1701.3	66	66	66	66	66	66	297.54
High	Q9UI26	Importin-11 OS=Homo sapiens OX=9606 GN=IPO11 PE=1 SV=1	FALSE	TRUE	4	3	3	3	975	112.5	High	High	High	High	High	High		0.844	0.831	0.354	0.676333	37	31.2	33	27.4	56.7	20.1	2	2	2	2	2	2	10.02
High	A0A0A0MST0	Myeloid differentiation primary response protein MyD88 OS=Homo sapiens OX=9606 GN=MYD88 PE=1 SV=1	FALSE	TRUE	4.73186	2	2	2	317	35.4	High	High	High	High	High	High		0.564	0.948	0.518	0.676667	44.7	25.2	29.2	27.7	50.4	26.1	2	2	2	2	2	2	4.81
High	O00116	Alkyldihydroxyacetonephosphate synthase, peroxisomal OS=Homo sapiens OX=9606 GN=AGPS PE=1 SV=1	FALSE	TRUE	7.14286	3	3	3	658	72.9	High	High	High	High	High	High		0.644	0.84	0.548	0.677333	19.6	12.6	16.7	14	21	11.5	1	1	1	1	1	1	11.5
High	Q96CB9	5-methylcytosine rRNA methyltransferase NSUN4 OS=Homo sapiens OX=9606 GN=NSUN4 PE=1 SV=2	FALSE	TRUE	2.08333	1	1	1	384	43.1	High	High	High	High	High	High		0.645	0.661	0.728	0.678	15.7	10.1	12.4	8.2	13.6	9.9	1	1	1	1	1	1	1.99
High	P15241	Keratin, type II microfibrillar, component 7C OS=Ovis aries PE=1 SV=1	TRUE	FALSE	43.5845	21	32	9	491	53.6	High	High	High	High	High	High		0.021	1.285	0.73	0.678667	4314.4	89.2	55.4	71.2	84.6	61.8	16	14	8	9	11	8	78.88
High	P60174	Triosephosphate isomerase OS=Homo sapiens OX=9606 GN=TPI1 PE=1 SV=3	FALSE	TRUE	19.9301	4	4	4	286	30.8	High	High	High	High	High	High		0.883	0.613	0.544	0.68	48.1	42.5	86.5	53	71.1	38.7	3	3	3	3	3	3	8.05
Medium	Q2M1P5	Kinesin-like protein KIF7 OS=Homo sapiens OX=9606 GN=KIF7 PE=1 SV=2	FALSE	TRUE	0.446761	1	1	1	1343	150.5	High	High	High	High	High	High		0.805	0.755	0.48	0.68	45.3	36.5	48.5	36.6	74.2	35.6	1	1	1	1	1	1	0
Medium	Q8TED1	Probable glutathione peroxidase 8 OS=Homo sapiens OX=9606 GN=GPX8 PE=1 SV=2	FALSE	TRUE	5.26316	1	1	1	209	23.9	High	High	High	High	High	High		0.881	0.703	0.457	0.680333	10.7	9.4	12.2	8.6	18.8	8.6	1	1	1	1	1	1	2.27
High	P30050	60S ribosomal protein L12 OS=Homo sapiens OX=9606 GN=RPL12 PE=1 SV=1	FALSE	TRUE	45.4545	5	7	5	165	17.8	High	High	High	High	High	High		0.752	0.783	0.519	0.684667	58.2	43.8	59.9	46.9	85.1	44.2	2	2	2	2	2	2	23.37
High	B2R4M6	Protein S100 OS=Homo sapiens OX=9606 PE=2 SV=1	FALSE	TRUE	11.4035	1	1	1	114	13.2	High	High	High	High	High	High		0.78	0.412	0.866	0.686	14.3	11.2	49.5	20.4	14.2	12.3	1	1	1	1	1	1	2.89
Medium	A0A0U5J8I0	Tumor necrosis factor (Ligand) superfamily, member 9, isoform CRA_a OS=Homo sapiens OX=9606 GN=TNLG5A PE=2 SV=1	FALSE	TRUE	3.93701	1	1	1	254	26.6	High	High	High	High	High	High		0.7	0.719	0.649	0.689333	18.9	13.2	19.9	14.3	21.1	13.7	1	1	1	1	1	1	2.74
Medium	A0A024RCT9	High mobility group AT-hook 1, isoform CRA_b OS=Homo sapiens OX=9606 GN=HMGA1 PE=4 SV=1	FALSE	TRUE	2.43902	1	1	1	328	34.3	High	High	High	High	High	High		0.879	0.642	0.548	0.689667	22.5	19.7	36.8	23.6	41.6	22.8	1	1	1	1	1	1	2.03
High	B3KTJ9	cDNA FLJ38393 fis, clone FEBRA2007212 OS=Homo sapiens OX=9606 PE=2 SV=1	FALSE	TRUE	14.8429	13	16	13	923	102.9	High	High	High	High	High	High		0.634	0.951	0.488	0.691	635.7	403	497.7	473.1	858.2	418.8	9	9	9	9	9	9	39.22
High	Q6NX51	Exocyst complex component 4 OS=Homo sapiens OX=9606 GN=EXOC4 PE=2 SV=1	FALSE	TRUE	2.3614	2	2	2	974	110.4	High	High	High	High	High	High		0.611	0.82	0.646	0.692333	15.9	9.7	13.3	10.9	18.9	12.2	1	1	1	1	1	1	4.59
High	P62906	60S ribosomal protein L10a OS=Homo sapiens OX=9606 GN=RPL10A PE=1 SV=2	FALSE	TRUE	41.9355	9	12	9	217	24.8	High	High	High	High	High	High		0.839	0.594	0.65	0.694333	230	193	254.5	151.1	299.8	194.8	7	7	7	7	7	7	34.15
High	P07737	Profilin-1 OS=Homo sapiens OX=9606 GN=PFN1 PE=1 SV=2	FALSE	TRUE	24.2857	3	3	3	140	15	High	High	High	High	High	High		0.818	0.632	0.645	0.698333	59.9	49	97.2	61.4	96.3	62.1	3	3	3	3	3	3	7.12
High	A8K4M5	cDNA FLJ76043, highly similar to Homo sapiens cyclin T1 (CCNT1), mRNA OS=Homo sapiens OX=9606 PE=2 SV=1	FALSE	TRUE	29.0634	18	27	15	726	80.5	High	High	High	High	High	High		0.627	1.015	0.454	0.698667	675.7	423.9	509.7	517.4	892.3	405.2	15	15	15	15	15	15	56.12
High	Q6P1A2	Lysophospholipid acyltransferase 5 OS=Homo sapiens OX=9606 GN=LPCAT3 PE=1 SV=1	FALSE	TRUE	6.3655	3	3	3	487	56	High	High	High	High	High	High		0.614	0.955	0.528	0.699	18.9	11.6	12.8	12.2	18	9.5	1	1	1	1	1	1	8.09
High	B4E2L0	cDNA FLJ54730, highly similar to cAMP-dependent protein kinase, beta-2-catalytic subunit OS=Homo sapiens OX=9606 PE=2 SV=1	FALSE	TRUE	27.8894	10	13	4	398	46.2	High	High	High	High	High	High		0.719	0.864	0.515	0.699333	68.2	49	49.8	43	82.9	42.7	2	2	2	2	2	2	36.27
High	Q92973	Transportin-1 OS=Homo sapiens OX=9606 GN=TNPO1 PE=1 SV=2	FALSE	TRUE	5.56793	5	5	5	898	102.3	High	High	High	High	High	High		0.749	0.835	0.516	0.7	76.2	57	69.8	58.3	103.9	53.6	3	3	3	3	3	3	14.05
Cut off used in this study based on a abundance ratio (column V) of < 0.7
High	P78527	DNA-dependent protein kinase catalytic subunit OS=Homo sapiens OX=9606 GN=PRKDC PE=1 SV=3	FALSE	TRUE	34.0843	131	181	130	4128	468.8	High	High	High	High	High	High		0.834	0.93	0.55	0.771333	0.197599	25.6178	4641.6	3872.8	3888.3	3616.5	6168.2	3393.8	108	108	108	108	108	108	492.96
High	Q13085	Acetyl-CoA carboxylase 1 OS=Homo sapiens OX=9606 GN=ACACA PE=1 SV=2	FALSE	TRUE	66.7093	128	524	4	2346	265.4	High	High	High	High	High	High		0.749	1.049	0.598	0.798667	0.229566	28.7436	12702.4	9512.3	10583	11103.1	17359.5	10375.3	133	133	133	133	133	133	1456.25
High	A0A024R0Y2	HCG30204, isoform CRA_a OS=Homo sapiens OX=9606 GN=hCG_30204 PE=4 SV=1	FALSE	TRUE	66.358	125	512	1	2268	257.1	High	High	High	High	High	High	Met-loss+Acetyl [N-Term]	0.875	1.191	0.709	0.925	0.244859	26.4713	209.8	183.5	168.1	200.2	253.7	179.9	1	1	1	1	1	1	1413.02
High	Q15149	Plectin OS=Homo sapiens OX=9606 GN=PLEC PE=1 SV=3	FALSE	TRUE	27.3911	113	134	110	4684	531.5	High	High	High	High	High	High		0.783	0.811	0.582	0.725333	0.124917	17.2221	2388.6	1871.3	2152.5	1745.3	3044.4	1772.4	78	78	78	78	78	78	345.33
High	P24928	DNA-directed RNA polymerase II subunit RPB1 OS=Homo sapiens OX=9606 GN=POLR2A PE=1 SV=2	FALSE	TRUE	60	111	715	83	1970	217	High	High	High	High	High	High		0.743	1.063	0.526	0.777333	0.270141	34.7523	23179.6	17214.4	17801.4	18918.7	31417.6	16519.7	132	132	132	132	132	132	1874.65
High	Q14204	Cytoplasmic dynein 1 heavy chain 1 OS=Homo sapiens OX=9606 GN=DYNC1H1 PE=1 SV=5	FALSE	TRUE	24.4081	98	116	97	4646	532.1	High	High	High	High	High	High		0.803	0.95	0.497	0.75	0.231104	30.8138	2117.4	1699.8	1708	1623.3	2843.1	1413.2	67	67	67	67	67	67	304.57
High	Q9BTC0	Death-inducer obliterator 1 OS=Homo sapiens OX=9606 GN=DIDO1 PE=1 SV=5	FALSE	TRUE	54.4643	95	177	93	2240	243.7	High	High	High	High	High	High		0.846	1.415	0.652	0.971	0.396561	40.8405	4407.5	3729.6	3197.8	4524.5	5621.8	3668.1	76	76	76	76	76	76	475.88
High	P46013	Proliferation marker protein Ki-67 OS=Homo sapiens OX=9606 GN=MKI67 PE=1 SV=2	FALSE	TRUE	37.9607	91	112	91	3256	358.5	High	High	High	High	High	High	Biotin [K1542]	0.745	1.048	0.532	0.775	0.259305	33.4587	2695.8	2008.4	2158.6	2262.4	3397.7	1806.9	66	66	66	66	66	66	287.37
High	O00763	Acetyl-CoA carboxylase 2 OS=Homo sapiens OX=9606 GN=ACACB PE=1 SV=3	FALSE	TRUE	42.8397	89	203	68	2458	276.4	High	High	High	High	High	High		0.783	1.146	0.587	0.838667	0.283627	33.8188	2873.8	2249.2	2227.4	2552.4	3876.6	2274.1	60	60	60	60	60	60	554.09
High	Q92576	PHD finger protein 3 OS=Homo sapiens OX=9606 GN=PHF3 PE=1 SV=3	FALSE	TRUE	49.1417	85	133	84	2039	229.3	High	High	High	High	High	High		0.7	1.206	0.565	0.823667	0.337921	41.0264	4004.5	2805	2850.4	3438.1	4967.8	2804.7	73	73	73	73	73	73	350.47
High	Q7Z333	Probable helicase senataxin OS=Homo sapiens OX=9606 GN=SETX PE=1 SV=4	FALSE	TRUE	32.7606	85	114	28	2677	302.7	High	High	High	High	High	High		0.755	1.175	0.565	0.831667	0.312143	37.5322	2870.5	2165.9	2155.9	2532.3	3697.3	2088.9	61	61	61	61	61	61	289.25
High	Q92797	Symplekin OS=Homo sapiens OX=9606 GN=SYMPK PE=1 SV=2	FALSE	TRUE	59.5761	68	152	57	1274	141.1	High	High	High	High	High	High		1.01	1.54	0.724	1.09133	0.414035	37.9385	3663.2	3700.7	2720	4187.6	4858.9	3515.9	57	57	57	57	57	57	394.71
High	Q9NZM1	Myoferlin OS=Homo sapiens OX=9606 GN=MYOF PE=1 SV=1	FALSE	TRUE	38.1853	67	83	67	2061	234.6	High	High	High	High	High	High		0.481	1.568	0.939	0.996	0.545737	54.7929	1856.3	892.3	1266	1984.5	1862.3	1748	49	49	49	49	49	49	213.8
High	P11498	Pyruvate carboxylase, mitochondrial OS=Homo sapiens OX=9606 GN=PC PE=1 SV=2	FALSE	TRUE	72.4109	66	336	66	1178	129.6	High	High	High	High	High	High		0.796	1.07	0.602	0.822667	0.235137	28.5823	7256.3	5773.7	5764.1	6165.7	9724	5853.9	70	70	70	70	70	70	987.47
High	Q5VT52	Regulation of nuclear pre-mRNA domain-containing protein 2 OS=Homo sapiens OX=9606 GN=RPRD2 PE=1 SV=1	FALSE	TRUE	61.7385	65	213	65	1461	155.9	High	High	High	High	High	High		0.828	1.243	0.592	0.887667	0.329576	37.1284	4163.3	3448.1	3064.1	3807.7	5415.2	3203.9	63	63	63	63	63	63	615.61
High	O94913	Pre-mRNA cleavage complex 2 protein Pcf11 OS=Homo sapiens OX=9606 GN=PCF11 PE=1 SV=3	FALSE	TRUE	47.4598	64	136	21	1555	172.9	High	High	High	High	High	High		1.008	1.547	0.722	1.09233	0.418916	38.3505	3626.1	3654.9	2702.5	4181.1	4764.5	3440.2	53	53	53	53	53	53	346.69
High	P49327	Fatty acid synthase OS=Homo sapiens OX=9606 GN=FASN PE=1 SV=3	FALSE	TRUE	31.82	62	75	62	2511	273.3	High	High	High	High	High	High		0.83	1.043	0.598	0.823667	0.222568	27.0216	1565.9	1299.4	1368.1	1427.3	2062.1	1233.5	44	44	44	44	44	44	216.55
High	A0A024R5M9	Nuclear mitotic apparatus protein 1, isoform CRA_a OS=Homo sapiens OX=9606 GN=NUMA1 PE=4 SV=1	FALSE	TRUE	32.9367	62	75	61	2101	236.4	High	High	High	High	High	High		0.827	1.066	0.582	0.825	0.242006	29.3341	1229.8	1016.5	994.9	1060.5	1605.3	934.7	41	41	41	41	41	41	227.05
High	Q8IWI9	MAX gene-associated protein OS=Homo sapiens OX=9606 GN=MGA PE=1 SV=3	FALSE	TRUE	23.7607	62	77	43	3026	331.6	High	High	High	High	High	High		0.803	1.288	0.584	0.891667	0.360278	40.405	1543.2	1239.1	1169.4	1506.4	2053.7	1199.5	43	43	43	43	43	43	226.94
High	A7BI36	p180/ribosome receptor OS=Homo sapiens OX=9606 GN=RRBP1 PE=2 SV=2	FALSE	TRUE	57.2727	61	78	61	1540	165.6	High	High	High	High	High	High		0.809	0.946	0.495	0.75	0.231216	30.8288	1529.7	1237.4	1221	1154.8	2043.6	1011.8	43	43	43	43	43	43	215.57
High	P30876	DNA-directed RNA polymerase II subunit RPB2 OS=Homo sapiens OX=9606 GN=POLR2B PE=1 SV=1	FALSE	TRUE	59.1141	61	160	61	1174	133.8	High	High	High	High	High	High		0.829	1.148	0.742	0.906333	0.213762	23.5854	4392.3	3639.9	3468.7	3981.5	5618.7	4171.5	62	62	62	62	62	62	463.71
High	A0A024R8E8	Senataxin, isoform CRA_b OS=Homo sapiens OX=9606 GN=SETX PE=4 SV=1	FALSE	TRUE	34.9662	59	80	2	1776	199.9	High	High	High	High	High	High		0.767	1.165	0.563	0.831667	0.306166	36.8135	54.3	41.6	47.6	55.5	70.9	39.9	1	1	1	1	1	1	206.61
High	E1NZA1	Peroxisome proliferator activated receptor interacting complex protein OS=Homo sapiens OX=9606 GN=PRIC295 PE=2 SV=1	FALSE	TRUE	21.9393	54	57	54	2671	292.6	High	High	High	High	High	High		0.807	0.993	0.511	0.770333	0.243083	31.5556	951.2	767.9	764.6	759.3	1280.7	654.6	32	32	32	32	32	32	134.53
High	Q96T58	Msx2-interacting protein OS=Homo sapiens OX=9606 GN=SPEN PE=1 SV=1	FALSE	TRUE	17.7129	53	59	52	3664	402	High	High	High	High	High	High		0.764	1.126	0.565	0.818333	0.284419	34.7559	1266.7	968	953.5	1074	1513.2	855.4	35	35	35	35	35	35	160.16
High	Q9UK61	Protein TASOR OS=Homo sapiens OX=9606 GN=FAM208A PE=1 SV=3	FALSE	TRUE	36.9461	52	69	52	1670	188.9	High	High	High	High	High	High		0.7	1.11	0.553	0.787667	0.288663	36.6479	1519.4	1064	1119.9	1243.2	1928.4	1065.7	40	40	40	40	40	40	200.98
High	Q9Y2F5	Little elongation complex subunit 1 OS=Homo sapiens OX=9606 GN=ICE1 PE=1 SV=5	FALSE	TRUE	25.0662	52	63	52	2266	247.7	High	High	High	High	High	High		0.758	1.145	0.613	0.838667	0.275021	32.7926	1237.5	938.6	970.7	1111.5	1646.4	1008.8	34	34	34	34	34	34	170.53
High	P49792	E3 SUMO-protein ligase RanBP2 OS=Homo sapiens OX=9606 GN=RANBP2 PE=1 SV=2	FALSE	TRUE	19.2308	51	55	38	3224	358	High	High	High	High	High	High		0.778	1.059	0.529	0.788667	0.265161	33.6214	821.4	638.8	658.8	697.5	1072.5	567.1	34	34	34	34	34	34	142.06
High	Q9UL03	Integrator complex subunit 6 OS=Homo sapiens OX=9606 GN=INTS6 PE=1 SV=1	FALSE	TRUE	62.4577	50	110	45	887	100.3	High	High	High	High	High	High		0.869	1.371	0.645	0.961667	0.371765	38.6584	2560.7	2225.6	1959.4	2686.3	3467.8	2237.2	43	43	43	43	43	43	297.3
High	Q8N1G2	Cap-specific mRNA (nucleoside-2'-O-)-methyltransferase 1 OS=Homo sapiens OX=9606 GN=CMTR1 PE=1 SV=1	FALSE	TRUE	61.1976	49	123	47	835	95.3	High	High	High	High	High	High		0.717	1.052	0.473	0.747333	0.290689	38.8969	4218.6	3025.9	3364.6	3540.4	5654.4	2674.5	53	53	53	53	53	53	325.92
High	Q9BYW2	Histone-lysine N-methyltransferase SETD2 OS=Homo sapiens OX=9606 GN=SETD2 PE=1 SV=3	FALSE	TRUE	23.1669	48	61	48	2564	287.4	High	High	High	High	High	High		0.793	1.131	0.599	0.841	0.269229	32.0129	1117.7	885.9	847.5	958.1	1414	846.9	34	34	34	34	34	34	166.87
High	A0A140VK53	Testicular secretory protein Li 53 OS=Homo sapiens OX=9606 PE=2 SV=1	FALSE	TRUE	22.8198	48	62	48	2752	299.4	High	High	High	High	High	High		0.991	1.399	0.841	1.077	0.28877	26.8124	945.9	937.1	808.5	1130.8	1239.4	1041.8	34	34	34	34	34	34	159.79
High	E9PQ01	Pre-mRNA cleavage complex 2 protein Pcf11 (Fragment) OS=Homo sapiens OX=9606 GN=PCF11 PE=1 SV=8	FALSE	TRUE	47.6954	48	104	5	998	112.1	High	High	High	High	High	High		1.064	1.634	0.691	1.12967	0.474917	42.0405	422.3	449.1	321.7	525.7	565.9	391.1	5	5	5	5	5	5	247.08
High	Q14690	Protein RRP5 homolog OS=Homo sapiens OX=9606 GN=PDCD11 PE=1 SV=3	FALSE	TRUE	29.0754	47	55	21	1871	208.6	High	High	High	High	High	High		0.818	0.95	0.536	0.768	0.21148	27.5365	1014.7	830.5	825	783.7	1324.7	709.9	30	30	30	30	30	30	133.55
High	A8KAK5	cDNA FLJ77399, highly similar to Homo sapiens cofactor required for Sp1 transcriptional activation, subunit 2, 150kDa (CRSP2), mRNA OS=Homo sapiens OX=9606 PE=2 SV=1	FALSE	TRUE	35.6946	47	72	46	1454	160.5	High	High	High	High	High	High		0.782	1.02	0.593	0.798333	0.213968	26.8018	1819.1	1421.9	1457.7	1487.4	2418.2	1434.9	37	37	37	37	37	37	184.92
High	Q8N201	Integrator complex subunit 1 OS=Homo sapiens OX=9606 GN=INTS1 PE=1 SV=2	FALSE	TRUE	24.6119	47	59	47	2190	244.1	High	High	High	High	High	High		0.787	1.175	0.564	0.842	0.309191	36.721	1264.1	994.8	941.3	1106.5	1658	934.8	35	35	35	35	35	35	148.35
High	A0A0C4DG89	Probable ATP-dependent RNA helicase DDX46 OS=Homo sapiens OX=9606 GN=DDX46 PE=1 SV=1	FALSE	TRUE	48.6434	47	74	47	1032	117.4	High	High	High	High	High	High		0.801	1.294	0.54	0.878333	0.382903	43.5942	1785	1430.6	1312.7	1698.4	2396.3	1295.1	39	39	39	39	39	39	207.61
High	P27708	CAD protein OS=Homo sapiens OX=9606 GN=CAD PE=1 SV=3	FALSE	TRUE	24.8989	46	56	45	2225	242.8	High	High	High	High	High	High		0.83	0.942	0.492	0.754667	0.234268	31.0425	792.5	657.7	632.4	595.7	1082.8	532.8	27	27	27	27	27	27	142.07
High	P05165	Propionyl-CoA carboxylase alpha chain, mitochondrial OS=Homo sapiens OX=9606 GN=PCCA PE=1 SV=4	FALSE	TRUE	67.3077	45	259	32	728	80	High	High	High	High	High	High		0.774	1.05	0.615	0.813	0.220107	27.0734	6726.6	5207.9	5443	5716.4	8998.4	5533.8	51	51	51	51	51	51	718.29
High	Q99590	Protein SCAF11 OS=Homo sapiens OX=9606 GN=SCAF11 PE=1 SV=2	FALSE	TRUE	34.7232	45	62	43	1463	164.6	High	High	High	High	High	High		0.74	1.239	0.545	0.841333	0.357925	42.5426	1181.7	874.7	846.9	1049.6	1466.6	799	32	32	32	32	32	32	168.53
High	A0A0C4DGG9	Chromodomain-helicase-DNA-binding protein 4 OS=Homo sapiens OX=9606 GN=CHD4 PE=1 SV=1	FALSE	TRUE	26.6908	45	57	35	1937	220.3	High	High	High	High	High	High		0.827	1.174	0.611	0.870667	0.284029	32.622	1279.2	1058.6	981.1	1151.9	1606.8	981.2	31	31	31	31	31	31	156.66
High	Q15648	Mediator of RNA polymerase II transcription subunit 1 OS=Homo sapiens OX=9606 GN=MED1 PE=1 SV=4	FALSE	TRUE	37.3182	44	62	44	1581	168.4	High	High	High	High	High	High		0.792	1.218	0.537	0.849	0.34406	40.5253	1309.8	1037.3	1021.8	1244.2	1902.4	1022.1	32	32	32	32	32	32	160.63
High	A0A024RA85	Cell division cycle 2-like 5 (Cholinesterase-related cell division controller), isoform CRA_a OS=Homo sapiens OX=9606 GN=CDC2L5 PE=4 SV=1	FALSE	TRUE	35.1852	43	62	4	1512	164.8	High	High	High	High	High	High		0.718	1.127	0.538	0.794333	0.301828	37.9977	1651	1185.3	1244.7	1403.4	2142.1	1152.4	32	32	32	32	32	32	176.17
High	A0A0B4J1V9	Helicase, lymphoid-specific, isoform CRA_b OS=Homo sapiens OX=9606 GN=HELLS PE=1 SV=1	FALSE	TRUE	47.3982	43	94	42	884	102.7	High	High	High	High	High	High		0.788	1.236	0.54	0.854667	0.352757	41.2742	3341.9	2632.6	2461.4	3043.5	4239.1	2290	42	42	42	42	42	42	255.21
High	P21333	Filamin-A OS=Homo sapiens OX=9606 GN=FLNA PE=1 SV=4	FALSE	TRUE	20.7027	42	47	38	2647	280.6	High	High	High	High	High	High		0.803	1.014	0.59	0.802333	0.212001	26.423	890.3	715.1	787.3	798.7	1164.9	687.3	27	27	27	27	27	27	134.74
High	P05787	Keratin, type II cytoskeletal 8 OS=Homo sapiens GN=KRT8 PE=1 SV=7	TRUE	TRUE	73.706	42	186	32	483	53.7	High	High	High	High	High	High		0.811	0.99	0.647	0.816	0.171555	21.0239	5350.6	4339.7	4373.8	4331.3	6441.9	4166	45	45	45	45	45	45	466.35
High	P07814	Bifunctional glutamate/proline--tRNA ligase OS=Homo sapiens OX=9606 GN=EPRS PE=1 SV=5	FALSE	TRUE	31.5476	41	47	39	1512	170.5	High	High	High	High	High	High		0.841	0.894	0.576	0.770333	0.170371	22.1166	1000.1	840.6	870.3	777.8	1267.9	730.2	28	28	28	28	28	28	119.71
High	V9HWB4	Epididymis secretory sperm binding protein Li 89n OS=Homo sapiens OX=9606 GN=HEL-S-89n PE=2 SV=1	FALSE	TRUE	59.1743	41	72	38	654	72.3	High	High	High	High	High	High		0.763	1.102	0.54	0.801667	0.282988	35.3	2286.7	1744.7	1796.1	1979.9	3050.8	1648.7	39	39	39	39	39	39	196.97
High	A0A2R8YH03	Protein FAM208B OS=Homo sapiens OX=9606 GN=FAM208B PE=1 SV=1	FALSE	TRUE	19.1304	41	48	40	2645	293.4	High	High	High	High	High	High		0.774	1.146	0.565	0.828333	0.294286	35.5275	777.1	601.3	598.3	685.6	997.8	563.7	27	27	27	27	27	27	134.21
High	H6VRG2	Keratin 1 OS=Homo sapiens OX=9606 GN=KRT1 PE=3 SV=1	TRUE	TRUE	58.2298	41	96	28	644	66	High	High	High	High	High	High		0.251	1.55	1.285	1.02867	0.686389	66.7261	3894.3	976.3	1177.8	1825.6	1382.2	1776.1	27	27	27	27	27	27	265.46
High	A0A024RA66	Cell division cycle 2-like 5 (Cholinesterase-related cell division controller), isoform CRA_b OS=Homo sapiens OX=9606 GN=CDC2L5 PE=4 SV=1	FALSE	TRUE	34.022	40	58	1	1452	158.3	High	High	High	High	High	High		0.675	1.089	0.415	0.726333	0.33992	46.7994	46.5	31.4	31.5	34.3	58.8	24.4	1	1	1	1	1	1	165.3
High	Q9UKL3	CASP8-associated protein 2 OS=Homo sapiens OX=9606 GN=CASP8AP2 PE=1 SV=1	FALSE	TRUE	20.6862	40	48	40	1982	222.5	High	High	High	High	High	High		0.707	1.184	0.564	0.818333	0.324648	39.6719	901.1	637.4	690	817	1158.5	653.8	25	25	25	25	25	25	110.43
High	Q08211	ATP-dependent RNA helicase A OS=Homo sapiens OX=9606 GN=DHX9 PE=1 SV=4	FALSE	TRUE	35.1969	40	60	40	1270	140.9	High	High	High	High	High	High		0.837	1.053	0.617	0.835667	0.218003	26.0873	1408.1	1178.2	1142.6	1202.6	1819.8	1122.5	32	32	32	32	32	32	179
High	Q14573	Inositol 1,4,5-trisphosphate receptor type 3 OS=Homo sapiens OX=9606 GN=ITPR3 PE=1 SV=2	FALSE	TRUE	17.3343	39	44	35	2671	303.9	High	High	High	High	High	High		0.849	0.983	0.559	0.797	0.21673	27.1933	871.4	740	759.4	746.3	1180.7	659.5	26	26	26	26	26	26	122.26
High	A0A024RBS3	Nuclear receptor co-repressor 2, isoform CRA_c OS=Homo sapiens OX=9606 GN=NCOR2 PE=4 SV=1	FALSE	TRUE	19.8252	39	44	39	2517	273.7	High	High	High	High	High	High		0.771	1.168	0.574	0.837667	0.30256	36.1193	829.7	639.6	650.3	759.9	1126.7	646.4	26	26	26	26	26	26	101.23
High	O75533	Splicing factor 3B subunit 1 OS=Homo sapiens OX=9606 GN=SF3B1 PE=1 SV=3	FALSE	TRUE	35.5061	39	65	39	1304	145.7	High	High	High	High	High	High		0.788	1.191	0.541	0.84	0.328105	39.0601	1553	1224.4	1160.5	1381.6	2011	1087.2	33	33	33	33	33	33	188.79
High	Q8N1G1	RNA exonuclease 1 homolog OS=Homo sapiens OX=9606 GN=REXO1 PE=1 SV=3	FALSE	TRUE	36.9369	39	51	39	1221	131.4	High	High	High	High	High	High		0.778	1.231	0.558	0.855667	0.343156	40.104	1721.2	1339.9	1244.5	1532	2233.9	1247.1	33	33	33	33	33	33	121.96
High	A6NEM2	Host cell factor 1 OS=Homo sapiens OX=9606 GN=HCFC1 PE=1 SV=2	FALSE	TRUE	22.8365	39	59	1	2080	213.3	High	High	High	High	High	High		0.844	1.287	0.62	0.917	0.339439	37.0163	1224.5	1032.9	920.6	1185	1601.3	993	31	31	31	31	31	31	162.43
High	P35908	Keratin, type II cytoskeletal 2 epidermal OS=Homo sapiens GN=KRT2 PE=1 SV=2	TRUE	TRUE	72.9264	39	77	25	639	65.4	High	High	High	High	High	High		0.525	2.092	1.23	1.28233	0.78481	61.2017	1494.4	784.1	1030.1	2154.6	1190.5	1464.3	26	26	26	26	26	26	252.46
High	A0A223PQH6	HCFC1 OS=Homo sapiens OX=9606 PE=4 SV=1	FALSE	TRUE	24.226	39	59	1	2035	208.6	High	High	High	High	High	High					#DIV/0!	#DIV/0!	#DIV/0!													159.06
High	Q8NFC6	Biorientation of chromosomes in cell division protein 1-like 1 OS=Homo sapiens OX=9606 GN=BOD1L1 PE=1 SV=2	FALSE	TRUE	13.766	38	42	37	3051	330.3	High	High	High	High	High	High		0.791	1.229	0.549	0.856333	0.344676	40.2502	842.9	666.3	637.5	783.4	1105.1	606.7	23	23	23	23	23	23	99.37
High	V9HW22	Epididymis luminal protein 33 OS=Homo sapiens OX=9606 GN=HEL-S-72p PE=2 SV=1	FALSE	TRUE	64.5511	37	103	30	646	70.9	High	High	High	High	High	High		0.782	1.132	0.529	0.814333	0.302798	37.1835	2883.9	2254.1	2219.7	2512.4	3959.2	2095.3	36	36	36	36	36	36	283.86
High	Q9HCS7	Pre-mRNA-splicing factor SYF1 OS=Homo sapiens OX=9606 GN=XAB2 PE=1 SV=2	FALSE	TRUE	45.0292	37	69	37	855	99.9	High	High	High	High	High	High		0.933	1.468	0.74	1.047	0.377151	36.0221	1564.5	1459.7	1193.8	1752.4	2033.6	1504.4	33	33	33	33	33	33	194.18
High	A0A0S2Z693	Methylcrotonoyl-CoA carboxylase 1 isoform 1 (Fragment) OS=Homo sapiens OX=9606 GN=MCCC1 PE=2 SV=1	FALSE	TRUE	66.2069	36	276	5	725	80.4	High	High	High	High	High	High	Biotin [K681]	0.782	1.07	0.615	0.822333	0.230166	27.9894	5231.6	4093.2	4133.6	4423.3	6806.8	4188.2	44	44	44	44	44	44	845.49
High	Q5JWT2	Mediator of RNA polymerase II transcription subunit 23 OS=Homo sapiens OX=9606 GN=MED23 PE=1 SV=1	FALSE	TRUE	29.476	36	43	36	1374	157	High	High	High	High	High	High		0.783	1.233	0.582	0.866	0.333342	38.4922	1129.2	884.5	860.4	1061	1497.4	870.9	27	27	27	27	27	27	98.7
High	Q8IXW5	Putative RNA polymerase II subunit B1 CTD phosphatase RPAP2 OS=Homo sapiens OX=9606 GN=RPAP2 PE=1 SV=1	FALSE	TRUE	53.1046	35	90	35	612	69.5	High	High	High	High	High	High		0.788	1.022	0.553	0.787667	0.2345	29.7715	2641.7	2081.2	2050.5	2095.4	3331	1842.3	32	32	32	32	32	32	240.32
High	P52272	Heterogeneous nuclear ribonucleoprotein M OS=Homo sapiens OX=9606 GN=HNRNPM PE=1 SV=3	FALSE	TRUE	51.9178	35	50	35	730	77.5	High	High	High	High	High	High		0.83	1.014	0.617	0.820333	0.198676	24.219	1368.5	1135.9	1146.2	1162.4	1780	1097.9	26	26	26	26	26	26	130.38
High	Q12789	General transcription factor 3C polypeptide 1 OS=Homo sapiens OX=9606 GN=GTF3C1 PE=1 SV=4	FALSE	TRUE	17.9232	34	36	34	2109	238.7	High	High	High	High	High	High		0.777	1.084	0.544	0.801667	0.270844	33.7851	424.2	329.5	323.6	350.7	539.3	293.6	14	14	14	14	14	14	69.17
High	A0A024RC65	HCG1991735, isoform CRA_a OS=Homo sapiens OX=9606 GN=hCG_1991735 PE=4 SV=1	FALSE	TRUE	26.4937	34	42	34	1657	189.1	High	High	High	High	High	High		0.864	1.012	0.538	0.804667	0.242506	30.1375	891.9	770.3	707.8	716	1193.5	642	22	22	22	22	22	22	122.83
High	Q14C88	AF4/FMR2 family, member 1, isoform CRA_b OS=Homo sapiens OX=9606 GN=AFF1 PE=2 SV=1	FALSE	TRUE	32.1222	34	46	19	1211	131.5	High	High	High	High	High	High		0.725	1.173	0.518	0.805333	0.334808	41.5738	942.4	683.6	709.7	832.8	1258.7	651.4	24	24	24	24	24	24	113.13
High	P53621	Coatomer subunit alpha OS=Homo sapiens OX=9606 GN=COPA PE=1 SV=2	FALSE	TRUE	31.8627	34	42	34	1224	138.3	High	High	High	High	High	High		0.931	1.21	0.774	0.971667	0.220826	22.7266	973.9	907.1	799.5	967.8	1161.8	899.6	25	25	25	25	25	25	112.31
High	P35527	Keratin, type I cytoskeletal 9 OS=Homo sapiens GN=KRT9 PE=1 SV=3	TRUE	TRUE	70.4655	34	96	32	623	62	High	High	High	High	High	High		0.267	1.542	1.114	0.974333	0.648873	66.5966	3813.8	1016.6	919	1417.5	1414.3	1574.9	26	26	26	26	26	26	324.18
High	A0A024R1N1	Myosin, heavy polypeptide 9, non-muscle, isoform CRA_a OS=Homo sapiens OX=9606 GN=MYH9 PE=3 SV=1	FALSE	TRUE	19.1837	33	34	33	1960	226.4	High	High	High	High	High	High		0.856	0.827	0.627	0.77	0.124688	16.1932	400.9	343.3	463.5	383.3	524	328.3	15	15	15	15	15	15	84.22
High	P08727	Keratin, type I cytoskeletal 19 OS=Homo sapiens GN=KRT19 PE=1 SV=4	TRUE	TRUE	81.75	33	123	22	400	44.1	High	High	High	High	High	High		0.837	0.973	0.606	0.805333	0.185538	23.0387	2162.7	1810.4	1843.1	1792.7	2790.8	1691.3	31	31	31	31	31	31	328.06
High	M0R2Z9	SURP and G-patch domain-containing protein 2 OS=Homo sapiens OX=9606 GN=SUGP2 PE=1 SV=1	FALSE	TRUE	36.2226	33	44	33	1096	121.5	High	High	High	High	High	High		0.755	1.163	0.558	0.825333	0.308571	37.3875	1339.9	1011.5	1054.7	1226.4	1825.3	1018.7	29	29	29	29	29	29	113.4
High	A8K6X9	cDNA FLJ76427, highly similar to Homo sapiens SH2 domain binding protein 1 (tetratricopeptide repeat containing) (SH2BP1), mRNA OS=Homo sapiens OX=9606 PE=2 SV=1	FALSE	TRUE	29.497	33	42	33	1173	133.4	High	High	High	High	High	High		0.778	1.171	0.558	0.835667	0.310542	37.161	768.5	597.5	563.1	659.7	1013.8	565.4	25	25	25	25	25	25	122.86
High	Q9NYV4	Cyclin-dependent kinase 12 OS=Homo sapiens OX=9606 GN=CDK12 PE=1 SV=2	FALSE	TRUE	24.6309	33	48	28	1490	164.1	High	High	High	High	High	High		0.83	1.212	0.573	0.871667	0.321531	36.8869	860.3	714.2	662.6	803.4	1122.2	643.5	24	24	24	24	24	24	124.25
High	Q7LBC6	Lysine-specific demethylase 3B OS=Homo sapiens OX=9606 GN=KDM3B PE=1 SV=2	FALSE	TRUE	24.134	32	37	4	1761	191.5	High	High	High	High	High	High		0.814	1.3	0.577	0.897	0.368577	41.09	747.2	608.4	546.6	710.5	1003.3	579	22	22	22	22	22	22	94.53
High	O15042	U2 snRNP-associated SURP motif-containing protein OS=Homo sapiens OX=9606 GN=U2SURP PE=1 SV=2	FALSE	TRUE	29.7376	32	50	32	1029	118.2	High	High	High	High	High	High		0.836	1.347	0.59	0.924333	0.386153	41.7764	1043	871.5	761.3	1025.7	1378.1	813.2	25	25	25	25	25	25	132.3
High	Q96L91	E1A-binding protein p400 OS=Homo sapiens OX=9606 GN=EP400 PE=1 SV=4	FALSE	TRUE	14.245	32	34	32	3159	343.3	High	High	High	High	High	High		0.932	1.293	0.705	0.976667	0.296534	30.3618	485.3	452.1	389.9	504	622.7	439.3	21	21	21	21	21	21	92.5
High	P15924	Desmoplakin OS=Homo sapiens OX=9606 GN=DSP PE=1 SV=3	FALSE	TRUE	11.8077	31	33	31	2871	331.6	High	High	High	High	High	High		0.613	0.988	0.729	0.776667	0.19199	24.7198	323.6	198.3	216.2	213.6	300.5	219	11	11	11	11	11	11	81.14
High	Q9NR30	Nucleolar RNA helicase 2 OS=Homo sapiens OX=9606 GN=DDX21 PE=1 SV=5	FALSE	TRUE	43.1673	31	48	29	783	87.3	High	High	High	High	High	High		0.809	1.016	0.556	0.793667	0.230383	29.0277	1355.3	1095.8	1080.7	1098.5	1736.5	966.3	26	26	26	26	26	26	122.51
High	Q96QC0	Serine/threonine-protein phosphatase 1 regulatory subunit 10 OS=Homo sapiens OX=9606 GN=PPP1R10 PE=1 SV=1	FALSE	TRUE	34.2553	31	54	31	940	99	High	High	High	High	High	High		0.736	1.155	0.523	0.804667	0.321547	39.9602	1807	1330.1	1297.3	1499	2305.5	1205.2	27	27	27	27	27	27	119.23
High	P27816	Microtubule-associated protein 4 OS=Homo sapiens OX=9606 GN=MAP4 PE=1 SV=3	FALSE	TRUE	31.3368	31	36	31	1152	120.9	High	High	High	High	High	High		0.78	1.143	0.533	0.818667	0.306833	37.4796	760.9	593.4	591.8	676.2	986.8	525.5	24	24	24	24	24	24	72.02
High	Q7KZ85	Transcription elongation factor SPT6 OS=Homo sapiens OX=9606 GN=SUPT6H PE=1 SV=2	FALSE	TRUE	20.2202	31	39	31	1726	198.9	High	High	High	High	High	High		0.805	1.137	0.539	0.827	0.299606	36.2281	418.3	337	331.1	376.3	544.2	293.5	18	18	18	18	18	18	106.55
High	A0A024RD80	Heat shock protein 90kDa alpha (Cytosolic), class B member 1, isoform CRA_a OS=Homo sapiens OX=9606 GN=HSP90AB1 PE=3 SV=1	FALSE	TRUE	45.8564	31	59	18	724	83.2	High	High	High	High	High	High		0.925	0.937	0.679	0.847	0.145616	17.192	1276	1179.8	1311.6	1229	1660.1	1127.1	27	27	27	27	27	27	169.14
High	A0A0S2Z3L2	ATPase Ca++ transporting cardiac muscle slow twitch 2 isoform 1 (Fragment) OS=Homo sapiens OX=9606 GN=ATP2A2 PE=2 SV=1	FALSE	TRUE	32.9175	30	40	30	1042	114.7	High	High	High	High	High	High		0.795	0.966	0.529	0.763333	0.220214	28.849	830.3	659.8	626.6	605.2	1022.1	540.9	23	23	23	23	23	23	107.37
High	Q14966	Zinc finger protein 638 OS=Homo sapiens OX=9606 GN=ZNF638 PE=1 SV=2	FALSE	TRUE	17.088	30	35	30	1978	220.5	High	High	High	High	High	High		0.68	1.087	0.531	0.766	0.287804	37.5723	663.8	451.2	491.5	534.5	879.2	467.1	21	21	21	21	21	21	87.3
High	P38646	Stress-70 protein, mitochondrial OS=Homo sapiens OX=9606 GN=HSPA9 PE=1 SV=2	FALSE	TRUE	49.3373	30	51	29	679	73.6	High	High	High	High	High	High		0.798	1.037	0.554	0.796333	0.241504	30.327	1266.5	1010.5	1058	1096.9	1712.4	948.8	25	25	25	25	25	25	134.37
High	B0I1S9	MYO1B variant protein OS=Homo sapiens OX=9606 GN=MYO1B PE=2 SV=1	FALSE	TRUE	27.9049	30	33	30	1136	131.9	High	High	High	High	High	High		0.812	1.047	0.596	0.818333	0.225567	27.5642	736	597.6	569.9	596.6	929.7	553.8	20	20	20	20	20	20	83.9
High	A0A0G2JIW1	Heat shock 70 kDa protein 1B OS=Homo sapiens OX=9606 GN=HSPA1B PE=1 SV=1	FALSE	TRUE	56.8536	30	59	25	642	70.1	High	High	High	High	High	High		0.804	1.12	0.545	0.823	0.28797	34.9903	901	724.1	708.3	793.2	1195.2	651.8	16	16	16	16	16	16	172.29
High	Q69YN4	Protein virilizer homolog OS=Homo sapiens OX=9606 GN=VIRMA PE=1 SV=2	FALSE	TRUE	17.66	30	34	30	1812	201.9	High	High	High	High	High	High		0.796	1.27	0.59	0.885333	0.348691	39.3853	728	579.7	536.3	681	955.8	564.1	19	19	19	19	19	19	86.19
High	O75643	U5 small nuclear ribonucleoprotein 200 kDa helicase OS=Homo sapiens OX=9606 GN=SNRNP200 PE=1 SV=2	FALSE	TRUE	16.0581	30	35	30	2136	244.4	High	High	High	High	High	High		0.89	1.207	0.654	0.917	0.277487	30.2603	776	690.6	622.9	751.8	1007.6	659.1	19	19	19	19	19	19	93.41
High	B3KMC9	5'-3' exoribonuclease OS=Homo sapiens OX=9606 PE=2 SV=1	FALSE	TRUE	39.2632	30	44	30	950	108.5	High	High	High	High	High	High		1.032	1.274	0.675	0.993667	0.301334	30.3255	959.6	990.7	763	971.8	1254.2	846.4	22	22	22	22	22	22	104.37
High	Q68D27	Uncharacterized protein DKFZp686B20267 OS=Homo sapiens OX=9606 GN=DKFZp686B20267 PE=2 SV=1	FALSE	TRUE	70.087	30	214	1	575	63.9	High	High	High	High	High	High	Biotin [K531]				#DIV/0!	#DIV/0!	#DIV/0!													638.34
High	B4DET1	cDNA FLJ53860, highly similar to DNA-directed RNA polymerase II largest subunit OS=Homo sapiens OX=9606 PE=2 SV=1	FALSE	TRUE	40.3509	29	209	1	855	91.8	High	High	High	High	High	High		0.732	0.86	0.525	0.705667	0.169045	23.9554	132.1	96.6	117.1	100.8	188.6	99.1	1	1	1	1	1	1	587.01
High	Q9H6T3	RNA polymerase II-associated protein 3 OS=Homo sapiens OX=9606 GN=RPAP3 PE=1 SV=2	FALSE	TRUE	44.812	29	41	29	665	75.7	High	High	High	High	High	High		0.675	1.075	0.439	0.729667	0.321505	44.0619	1164	786.2	842.2	905.1	1511.1	663.3	25	25	25	25	25	25	115.15
High	O95402	Mediator of RNA polymerase II transcription subunit 26 OS=Homo sapiens OX=9606 GN=MED26 PE=1 SV=2	FALSE	TRUE	48.1667	29	67	29	600	65.4	High	High	High	High	High	High		0.743	1.112	0.524	0.793	0.297172	37.4744	1920	1425.9	1499.4	1666.9	2605.2	1364	26	26	26	26	26	26	183.75
High	C6EMX8	DNA replication licensing factor MCM7 OS=Homo sapiens OX=9606 GN=MCM7 PE=2 SV=1	FALSE	TRUE	44.3672	29	36	29	719	81.2	High	High	High	High	High	High		0.836	1.026	0.556	0.806	0.236432	29.334	646.4	540.1	543.4	557.3	902.4	501.4	23	23	23	23	23	23	100.74
High	Q9P1Y6	PHD and RING finger domain-containing protein 1 OS=Homo sapiens OX=9606 GN=PHRF1 PE=1 SV=3	FALSE	TRUE	19.4663	29	40	26	1649	178.6	High	High	High	High	High	High		0.802	1.23	0.592	0.874667	0.325148	37.174	930.6	746.4	679	835	1166	690.4	23	23	23	23	23	23	84.75
High	Q8WUM4	Programmed cell death 6-interacting protein OS=Homo sapiens OX=9606 GN=PDCD6IP PE=1 SV=1	FALSE	TRUE	36.7512	29	34	29	868	96	High	High	High	High	High	High		0.937	1.098	0.591	0.875333	0.259064	29.5961	841	788	669.5	734.8	1089.2	643.9	23	23	23	23	23	23	93.79
High	A4FUT8	JMJD1B protein (Fragment) OS=Homo sapiens OX=9606 GN=JMJD1B PE=2 SV=1	FALSE	TRUE	25.403	29	33	1	1551	169	High	High	High	High	High	High					#DIV/0!	#DIV/0!	#DIV/0!													84.4
High	A0A024R8M9	ATP-dependent DNA helicase OS=Homo sapiens OX=9606 GN=RECQL5 PE=3 SV=1	FALSE	TRUE	32.997	28	35	28	991	108.8	High	High	High	High	High	High		0.77	1.073	0.497	0.78	0.28813	36.9398	992.1	763.7	744.9	798.9	1385.1	687.9	23	23	23	23	23	23	104.44
High	A8K8U1	cDNA FLJ77762, highly similar to Homo sapiens cullin-associated and neddylation-dissociated 1 (CAND1), mRNA OS=Homo sapiens OX=9606 PE=2 SV=1	FALSE	TRUE	24.5528	28	36	28	1230	136.2	High	High	High	High	High	High		0.895	1.019	0.508	0.807333	0.266541	33.015	672.9	602.5	536.2	546.3	909.2	461.7	21	21	21	21	21	21	95.98
High	O14617	AP-3 complex subunit delta-1 OS=Homo sapiens OX=9606 GN=AP3D1 PE=1 SV=1	FALSE	TRUE	27.32	28	31	28	1153	130.1	High	High	High	High	High	High		0.807	1.115	0.522	0.814667	0.296574	36.4044	641.7	518	482.9	538.4	836.1	436.7	21	21	21	21	21	21	77.82
High	P25705	ATP synthase subunit alpha, mitochondrial OS=Homo sapiens OX=9606 GN=ATP5F1A PE=1 SV=1	FALSE	TRUE	57.1429	28	67	28	553	59.7	High	High	High	High	High	High		0.851	0.999	0.602	0.817333	0.20063	24.5469	1742	1482.2	1381.6	1380.5	2234	1344.4	24	24	24	24	24	24	182.84
High	P50990	T-complex protein 1 subunit theta OS=Homo sapiens OX=9606 GN=CCT8 PE=1 SV=4	FALSE	TRUE	57.6642	28	40	28	548	59.6	High	High	High	High	High	High		0.795	1.104	0.576	0.825	0.265275	32.1546	711.5	565.7	573.8	633.6	935.9	539.2	19	19	19	19	19	19	117.45
High	A0A024R1Y0	Breast cancer type 1 susceptibility protein OS=Homo sapiens OX=9606 GN=BRCA1 PE=4 SV=1	FALSE	TRUE	14.7075	28	30	28	1863	207.6	High	High	High	High	High	High		0.745	1.187	0.55	0.827333	0.326384	39.4501	735.6	548.3	533.4	633.4	930.6	511.9	21	21	21	21	21	21	68.97
High	B4DH82	cDNA FLJ54437, highly similar to RRP5 protein homolog (Fragment) OS=Homo sapiens OX=9606 PE=2 SV=1	FALSE	TRUE	25.4042	27	31	1	1299	143.1	Medium	Medium	Medium	Medium	Medium	Medium		0.801	0.948	0.501	0.75	0.227822	30.3763	108.2	86.7	88.5	83.9	147.8	74	1	1	1	1	1	1	72.28
High	P53618	Coatomer subunit beta OS=Homo sapiens OX=9606 GN=COPB1 PE=1 SV=3	FALSE	TRUE	33.893	27	35	27	953	107.1	High	High	High	High	High	High		0.814	0.981	0.524	0.773	0.231242	29.9149	861.4	700.9	690.9	677.7	1191	623.8	19	19	19	19	19	19	95.93
High	Q00839	Heterogeneous nuclear ribonucleoprotein U OS=Homo sapiens OX=9606 GN=HNRNPU PE=1 SV=6	FALSE	TRUE	35.2727	27	43	2	825	90.5	High	High	High	High	High	High		0.834	0.961	0.543	0.779333	0.214295	27.4972	1210.1	1009.8	992.6	953.9	1597.3	867.6	23	23	23	23	23	23	107.79
High	B2RA03	cDNA, FLJ94640, highly similar to Homo sapiens keratin 18 (KRT18), mRNA OS=Homo sapiens OX=9606 PE=2 SV=1	FALSE	TRUE	60.6977	27	104	18	430	48	High	High	High	High	High	High		0.783	0.999	0.661	0.814333	0.171165	21.019	2506.2	1963.6	1900.5	1899.2	2795.9	1846.7	32	32	32	32	32	32	294.85
High	Q86XP3	ATP-dependent RNA helicase DDX42 OS=Homo sapiens OX=9606 GN=DDX42 PE=1 SV=1	FALSE	TRUE	38.5928	27	34	5	938	102.9	High	High	High	High	High	High		0.793	1.13	0.563	0.828667	0.285178	34.414	687.6	545	546.1	617.3	927.1	522.1	21	21	21	21	21	21	96.75
High	K9JA46	Epididymis luminal secretory protein 52 OS=Homo sapiens OX=9606 GN=EL52 PE=2 SV=1	FALSE	TRUE	36.0656	27	50	15	732	84.6	High	High	High	High	High	High		0.963	0.93	0.668	0.853667	0.161636	18.9344	407.9	392.7	473.8	440.8	580.5	387.8	14	14	14	14	14	14	133.99
High	V9HWB8	Pyruvate kinase OS=Homo sapiens OX=9606 GN=HEL-S-30 PE=1 SV=1	FALSE	TRUE	62.3352	27	50	3	531	57.9	High	High	High	High	High	High	Met-loss+Acetyl [N-Term]	0.905	0.859	0.871	0.878333	0.0238607	2.71659	1194.4	1080.6	1286.1	1104.8	1360.3	1184.2	24	24	24	24	24	24	149.68
High	H3BVG0	Nuclear pore complex protein Nup93 OS=Homo sapiens OX=9606 GN=NUP93 PE=1 SV=1	FALSE	TRUE	33.6364	26	30	26	880	99.5	High	High	High	High	High	High		0.852	0.858	0.564	0.758	0.168036	22.1683	402.6	343.1	383.8	329.3	526.9	297.3	15	15	15	15	15	15	79.49
High	A0A1W2PPS1	Heterogeneous nuclear ribonucleoprotein U OS=Homo sapiens OX=9606 GN=HNRNPU PE=1 SV=1	FALSE	TRUE	35.0746	26	42	1	804	88.3	High	High	High	High	High	High		0.859	0.921	0.513	0.764333	0.219858	28.7646	141.3	121.4	114.4	105.3	184.9	94.8	1	1	1	1	1	1	111.02
High	Q02952	A-kinase anchor protein 12 OS=Homo sapiens OX=9606 GN=AKAP12 PE=1 SV=4	FALSE	TRUE	19.3603	26	29	26	1782	191.4	High	High	High	High	High	High		0.836	0.993	0.513	0.780667	0.244737	31.3498	465.1	388.7	392.8	390.1	606.5	311.1	18	18	18	18	18	18	73
High	E7EX59	Propionyl-CoA carboxylase beta chain, mitochondrial OS=Homo sapiens OX=9606 GN=PCCB PE=1 SV=1	FALSE	TRUE	57.0175	26	73	26	570	61.6	High	High	High	High	High	High		0.908	1.296	0.804	1.00267	0.259302	25.8612	1577.9	1432.2	1136.9	1473.7	1834.6	1475.3	25	25	25	25	25	25	212.88
High	P13645	Keratin, type I cytoskeletal 10 OS=Homo sapiens OX=9606 GN=KRT10 PE=1 SV=6	TRUE	TRUE	50.5137	26	65	21	584	58.8	High	High	High	High	High	High		0.409	1.703	1.165	1.09233	0.650053	59.5105	1560.3	637.4	1014.5	1727.4	1077	1254.5	21	21	21	21	21	21	186.21
High	B0AZQ4	Structural maintenance of chromosomes protein OS=Homo sapiens OX=9606 PE=2 SV=1	FALSE	TRUE	22.6787	25	27	25	1217	141.4	High	High	High	High	High	High		0.748	0.991	0.515	0.751333	0.238018	31.6793	351.2	262.5	258.2	255.9	441.4	227.3	13	13	13	13	13	13	56.66
High	Q12931	Heat shock protein 75 kDa, mitochondrial OS=Homo sapiens OX=9606 GN=TRAP1 PE=1 SV=3	FALSE	TRUE	40.1989	25	38	24	704	80.1	High	High	High	High	High	High		0.785	1.121	0.71	0.872	0.218877	25.1005	999.5	784.9	715.4	802.3	1074.7	763	19	19	18	19	18	18	101.79
High	Q5T4S7	E3 ubiquitin-protein ligase UBR4 OS=Homo sapiens OX=9606 GN=UBR4 PE=1 SV=1	FALSE	TRUE	5.6531	25	25	25	5183	573.5	High	High	High	High	High	High		0.849	1.162	0.652	0.887667	0.257189	28.9736	306.6	260.2	238.4	277	359.9	234.6	9	9	9	9	9	9	52.46
High	Q68E01	Integrator complex subunit 3 OS=Homo sapiens OX=9606 GN=INTS3 PE=1 SV=1	FALSE	TRUE	31.0642	25	37	25	1043	118	High	High	High	High	High	High		0.812	1.259	0.606	0.892333	0.33383	37.4109	648.5	526.8	467.6	588.8	834.9	506.3	20	20	20	20	20	20	104.75
High	O60264	SWI/SNF-related matrix-associated actin-dependent regulator of chromatin subfamily A member 5 OS=Homo sapiens OX=9606 GN=SMARCA5 PE=1 SV=1	FALSE	TRUE	20.1521	25	29	13	1052	121.8	High	High	High	High	High	High		0.906	1.187	0.585	0.892667	0.301221	33.744	724.4	656.3	574.5	681.8	992.2	580.5	20	20	20	20	20	20	59.93
High	A0A024R5Z9	Pyruvate kinase OS=Homo sapiens OX=9606 GN=PKM2 PE=3 SV=1	FALSE	TRUE	54.4256	25	44	1	531	58	Medium	Medium	Medium	Medium	Medium	Medium	Met-loss+Acetyl [N-Term]	1.133	0.914	1.269	1.10533	0.17911	16.2041	18.2	20.6	22	20.1	18.6	23.6	1	1	1	1	1	1	126.17
High	P48668	Keratin, type II cytoskeletal 6C OS=Homo sapiens GN=KRT6C PE=1 SV=3	TRUE	TRUE	37.9433	25	55	1	564	60	High	High	High	High	High	High		0.381	0.344	3.778	1.501	1.97203	131.381	270.7	103.2	830.9	285.9	140	528.9	7	8	8	8	8	8	132.75
High	B2RWN5	HEAT repeat containing 1 OS=Homo sapiens OX=9606 GN=HEATR1 PE=2 SV=1	FALSE	TRUE	11.1007	24	25	24	2144	242.1	High	High	High	High	High	High		0.854	0.955	0.541	0.783333	0.215857	27.5562	333.8	285	282.2	269.6	443.4	240.1	13	13	13	13	13	13	52.58
High	Q92621	Nuclear pore complex protein Nup205 OS=Homo sapiens OX=9606 GN=NUP205 PE=1 SV=3	FALSE	TRUE	13.0219	24	27	24	2012	227.8	High	High	High	High	High	High		0.842	0.962	0.559	0.787667	0.206921	26.2701	599.2	504.6	520.6	501	822.7	459.5	17	17	17	17	17	17	72
High	O76021	Ribosomal L1 domain-containing protein 1 OS=Homo sapiens OX=9606 GN=RSL1D1 PE=1 SV=3	FALSE	TRUE	43.4694	24	41	24	490	54.9	High	High	High	High	High	High		0.809	1.025	0.585	0.806333	0.220012	27.2855	1344.9	1088.6	1082.8	1110.2	1738.9	1017.8	20	20	20	20	20	20	99.13
High	O00159	Unconventional myosin-Ic OS=Homo sapiens OX=9606 GN=MYO1C PE=1 SV=4	FALSE	TRUE	23.6124	24	33	4	1063	121.6	High	High	High	High	High	High		0.873	0.973	0.586	0.810667	0.200889	24.7807	690.8	603.3	577.3	561.9	947.8	555.6	17	17	17	17	17	17	84.66
High	Q01780	Exosome component 10 OS=Homo sapiens OX=9606 GN=EXOSC10 PE=1 SV=2	FALSE	TRUE	34.6893	24	29	24	885	100.8	High	High	High	High	High	High		0.783	1.17	0.584	0.845667	0.297984	35.2366	449.4	351.8	344.2	402.7	591.8	345.5	17	17	17	17	17	17	75.8
High	Q7L590	Protein MCM10 homolog OS=Homo sapiens OX=9606 GN=MCM10 PE=1 SV=2	FALSE	TRUE	31.0857	24	27	24	875	98.1	High	High	High	High	High	High		0.792	1.229	0.574	0.865	0.333546	38.5602	630.3	499.4	461.9	567.7	837.5	480.7	16	16	16	16	16	16	69.46
High	Q71F56	Mediator of RNA polymerase II transcription subunit 13-like OS=Homo sapiens OX=9606 GN=MED13L PE=1 SV=1	FALSE	TRUE	15.2489	24	26	24	2210	242.4	High	High	High	High	High	High		0.81	1.255	0.547	0.870667	0.357878	41.1039	478.6	387.6	351	440.5	647.2	354	13	13	13	13	13	13	64.58
High	A0A024QZH6	Serine arginine-rich pre-mRNA splicing factor SR-A1, isoform CRA_a OS=Homo sapiens OX=9606 GN=SR-A1 PE=4 SV=1	FALSE	TRUE	24.2378	24	41	21	1312	139.2	High	High	High	High	High	High		0.826	1.272	0.579	0.892333	0.35123	39.3608	671	554.1	479.5	609.7	861.9	498.9	13	13	13	13	13	13	107.65
High	Q8IWX8	Calcium homeostasis endoplasmic reticulum protein OS=Homo sapiens OX=9606 GN=CHERP PE=1 SV=3	FALSE	TRUE	33.952	24	43	24	916	103.6	High	High	High	High	High	High		0.885	1.335	0.605	0.941667	0.368284	39.1098	1350.9	1195.3	1020.2	1362.4	1777.2	1075.7	19	19	19	19	19	19	129.04
High	P04259	Keratin, type II cytoskeletal 6B OS=Homo sapiens GN=KRT6B PE=1 SV=5	TRUE	TRUE	34.9291	24	57	0	564	60	Not Found	Not Found	Not Found	Not Found	Not Found	Not Found					#DIV/0!	#DIV/0!	#DIV/0!													134.27
High	Q8IZD2	Inactive histone-lysine N-methyltransferase 2E OS=Homo sapiens OX=9606 GN=KMT2E PE=1 SV=1	FALSE	TRUE	14.8547	23	26	21	1858	204.8	High	High	High	High	High	High		0.635	0.997	0.519	0.717	0.249327	34.7737	552.3	350.7	417.3	416.2	715.8	371.5	13	13	13	13	13	13	64.5
High	Q14683	Structural maintenance of chromosomes protein 1A OS=Homo sapiens OX=9606 GN=SMC1A PE=1 SV=2	FALSE	TRUE	17.8427	23	24	23	1233	143.1	High	High	High	High	High	High		0.776	0.992	0.506	0.758	0.243499	32.1239	506.2	393	402.4	399.2	675.1	341.4	17	17	17	17	17	17	60.99
High	P54886	Delta-1-pyrroline-5-carboxylate synthase OS=Homo sapiens OX=9606 GN=ALDH18A1 PE=1 SV=2	FALSE	TRUE	33.5849	23	33	23	795	87.2	High	High	High	High	High	High		0.786	0.947	0.576	0.769667	0.186039	24.1713	770.2	605	638	604.4	997.4	574.9	21	21	21	21	21	21	83.09
High	Q53GE9	Elongation factor 1-alpha (Fragment) OS=Homo sapiens OX=9606 PE=2 SV=1	FALSE	TRUE	58.0087	23	83	13	462	50.1	High	High	High	High	High	High		0.851	0.963	0.532	0.782	0.223631	28.5974	3263.9	2776	2650.7	2552.5	4354.2	2315.1	23	23	23	23	23	23	159.74
High	O75400	Pre-mRNA-processing factor 40 homolog A OS=Homo sapiens OX=9606 GN=PRPF40A PE=1 SV=2	FALSE	TRUE	24.7649	23	38	21	957	108.7	High	High	High	High	High	High		0.747	1.118	0.508	0.791	0.307371	38.8585	861.2	643.2	647.8	724.3	1160.7	589.3	18	18	18	18	18	18	93.06
High	P49756	RNA-binding protein 25 OS=Homo sapiens OX=9606 GN=RBM25 PE=1 SV=3	FALSE	TRUE	26.2159	23	36	23	843	100.1	High	High	High	High	High	High		0.734	1.17	0.533	0.812333	0.325644	40.0875	902.4	662	680.7	796.1	1236.6	658.6	18	18	18	18	18	18	93.35
High	Q6P1J9	Parafibromin OS=Homo sapiens OX=9606 GN=CDC73 PE=1 SV=1	FALSE	TRUE	44.6328	23	45	23	531	60.5	High	High	High	High	High	High		0.751	1.155	0.551	0.819	0.307688	37.5688	1673	1255.7	1252.9	1446.8	2158	1188.5	21	21	21	21	21	21	113.62
High	Q01813	ATP-dependent 6-phosphofructokinase, platelet type OS=Homo sapiens OX=9606 GN=PFKP PE=1 SV=2	FALSE	TRUE	39.6684	23	30	19	784	85.5	High	High	High	High	High	High		0.889	1.051	0.533	0.824333	0.264986	32.1454	361.7	321.4	305.3	320.8	481.2	256.6	14	14	14	14	14	14	89.35
High	Q6PJP8	DNA cross-link repair 1A protein OS=Homo sapiens OX=9606 GN=DCLRE1A PE=1 SV=3	FALSE	TRUE	23.1731	23	27	23	1040	116.3	High	High	High	High	High	High		0.756	1.221	0.547	0.841333	0.345008	41.0073	767.9	580.9	560.5	684.5	1015.4	555.3	21	21	21	21	21	21	62.34
High	B2R791	cDNA, FLJ93335, highly similar to Homo sapiens PRP3 pre-mRNA processing factor 3 homolog (yeast) (PRPF3), mRNA OS=Homo sapiens OX=9606 PE=2 SV=1	FALSE	TRUE	41.7277	23	26	23	683	77.5	High	High	High	High	High	High		0.752	1.22	0.556	0.842667	0.341159	40.4856	929.4	698.6	687.2	838.2	1200.6	667.5	19	19	19	19	19	19	71.88
High	Q93009	Ubiquitin carboxyl-terminal hydrolase 7 OS=Homo sapiens OX=9606 GN=USP7 PE=1 SV=2	FALSE	TRUE	25.4991	23	25	23	1102	128.2	High	High	High	High	High	High		0.751	1.24	0.575	0.855333	0.344558	40.2835	505	379.2	374.4	464.2	658.2	378.4	16	16	16	16	16	16	64.77
High	Q93074	Mediator of RNA polymerase II transcription subunit 12 OS=Homo sapiens OX=9606 GN=MED12 PE=1 SV=4	FALSE	TRUE	11.7134	23	26	23	2177	242.9	High	High	High	High	High	High		0.837	1.146	0.625	0.869333	0.262001	30.1381	292.2	244.7	232.1	266	400.2	250.1	12	12	12	12	12	12	73.21
High	Q6KC79	Nipped-B-like protein OS=Homo sapiens OX=9606 GN=NIPBL PE=1 SV=2	FALSE	TRUE	8.41655	23	25	23	2804	315.9	High	High	High	High	High	High		0.884	1.16	0.592	0.878667	0.284038	32.326	490	433.1	380.8	441.7	634.7	376	17	17	17	17	17	17	37.49
High	P18583	Protein SON OS=Homo sapiens OX=9606 GN=SON PE=1 SV=4	FALSE	TRUE	13.9324	23	29	22	2426	263.7	High	High	High	High	High	High		0.87	1.171	0.633	0.891333	0.269634	30.2506	347.3	302.1	259.2	303.6	430.4	272.6	12	12	12	12	12	12	77.35
High	Q12830	Nucleosome-remodeling factor subunit BPTF OS=Homo sapiens OX=9606 GN=BPTF PE=1 SV=3	FALSE	TRUE	8.3388	23	25	23	3046	338.1	High	High	High	High	High	High		0.895	1.125	0.668	0.896	0.228502	25.5024	229.1	205	179	201.4	271.8	181.6	11	11	11	11	11	11	63.69
High	B3KX23	cDNA FLJ44516 fis, clone UTERU3002600, highly similar to Homo sapiens DEAD (Asp-Glu-Ala-Asp) box polypeptide 42 (DDX42), transcript variant 2, mRNA OS=Homo sapiens OX=9606 PE=2 SV=1	FALSE	TRUE	43.0267	23	28	1	674	73.2	High	High	High	High	High	High		0.709	1.431	0.566	0.902	0.463673	51.405	14.8	10.5	8.1	11.6	21.2	12	1	1	1	1	1	1	76.68
High	Q9NVC6	Mediator of RNA polymerase II transcription subunit 17 OS=Homo sapiens OX=9606 GN=MED17 PE=1 SV=2	FALSE	TRUE	39.1705	23	34	23	651	72.8	High	High	High	High	High	High		0.909	1.072	0.735	0.905333	0.16853	18.6152	890.1	809.6	772	827.3	1207.6	887.9	21	21	21	21	21	21	89.09
High	P17987	T-complex protein 1 subunit alpha OS=Homo sapiens OX=9606 GN=TCP1 PE=1 SV=1	FALSE	TRUE	43.8849	23	32	23	556	60.3	High	High	High	High	High	High		0.919	1.01	0.841	0.923333	0.0845833	9.16065	712.6	654.9	656.8	663.3	861.1	724.3	20	20	20	20	20	20	86.55
High	A0A0A0MT33	Protein SCAF8 OS=Homo sapiens OX=9606 GN=SCAF8 PE=1 SV=1	FALSE	TRUE	17.8651	23	42	20	1349	148.8	High	High	High	High	High	High		0.831	1.347	0.601	0.926333	0.382028	41.2409	1352.8	1124.5	1000.9	1348	1783.8	1072.5	22	22	22	22	22	22	103.82
High	B4DK31	cDNA FLJ54634, highly similar to Acetyl-CoA carboxylase 1 OS=Homo sapiens OX=9606 PE=2 SV=1	FALSE	TRUE	81.0458	22	87	1	306	35.6	High	High	High	High	High	High		0.653	1.04	0.553	0.748667	0.257209	34.3556	19.4	12.6	23	23.9	30	16.6	1	1	1	1	1	1	246.06
High	Q9Y5B0	RNA polymerase II subunit A C-terminal domain phosphatase OS=Homo sapiens OX=9606 GN=CTDP1 PE=1 SV=3	FALSE	TRUE	28.9282	22	26	22	961	104.3	High	High	High	High	High	High		0.747	1.119	0.522	0.796	0.301501	37.877	581.5	434.4	450.2	503.8	772.1	403.1	14	14	14	14	14	14	71.24
High	Q9Y678	Coatomer subunit gamma-1 OS=Homo sapiens OX=9606 GN=COPG1 PE=1 SV=1	FALSE	TRUE	32.9519	22	28	20	874	97.7	High	High	High	High	High	High		0.834	1.049	0.527	0.803333	0.262348	32.6574	310.8	259.2	238.1	249.7	407.6	214.8	13	13	13	13	13	13	71.81
High	J3KTA4	Probable ATP-dependent RNA helicase DDX5 OS=Homo sapiens OX=9606 GN=DDX5 PE=1 SV=1	FALSE	TRUE	35.9935	22	26	18	614	69	High	High	High	High	High	High		0.799	1.045	0.591	0.811667	0.227265	27.9998	702.3	561.3	586.8	612.9	928.4	548.6	19	19	19	19	19	19	63.49
High	W5ZR30	Transcription factor 20 (AR1), isoform CRA_b OS=Homo sapiens OX=9606 GN=TCF20 PE=2 SV=1	FALSE	TRUE	15.9694	22	23	22	1960	211.6	High	High	High	High	High	High		0.701	1.204	0.56	0.821667	0.338533	41.2007	304.5	213.5	221.2	266.4	387.8	217.3	11	11	11	11	11	11	55.7
High	O43242	26S proteasome non-ATPase regulatory subunit 3 OS=Homo sapiens OX=9606 GN=PSMD3 PE=1 SV=2	FALSE	TRUE	45.5056	22	27	22	534	60.9	High	High	High	High	High	High		0.821	1.077	0.571	0.823	0.253006	30.7419	827.6	679.4	636.2	685.1	1049	599.4	17	17	17	17	17	17	79.2
High	A0A024R5V9	NMDA receptor regulated 2, isoform CRA_b OS=Homo sapiens OX=9606 GN=NARG2 PE=4 SV=1	FALSE	TRUE	28.9206	22	27	22	982	109.9	High	High	High	High	High	High		0.746	1.16	0.58	0.828667	0.298706	36.0466	691.8	515.8	516.2	598.7	896.9	520.5	19	19	19	19	19	19	81.17
High	Q92945	Far upstream element-binding protein 2 OS=Homo sapiens OX=9606 GN=KHSRP PE=1 SV=4	FALSE	TRUE	35.7243	22	27	19	711	73.1	High	High	High	High	High	High		0.826	1.097	0.581	0.834667	0.258109	30.9236	398.7	329.6	330.6	362.7	533.6	310	16	16	16	16	16	16	68.77
High	Q8NG31	Kinetochore scaffold 1 OS=Homo sapiens OX=9606 GN=KNL1 PE=1 SV=3	FALSE	TRUE	11.7848	22	22	17	2342	265.2	High	High	High	High	High	High		0.811	1.211	0.616	0.879333	0.303329	34.4953	312.5	253.5	247.7	300	438.4	270.2	12	12	12	12	12	12	63.37
High	A0A1W2PPI5	DEAD/H (Asp-Glu-Ala-Asp/His) box polypeptide 26B, isoform CRA_b OS=Homo sapiens OX=9606 GN=INTS6L PE=1 SV=1	FALSE	TRUE	31.7372	22	29	17	898	100.7	High	High	High	High	High	High		0.897	1.429	0.622	0.982667	0.410264	41.75	246.3	220.9	173.2	247.5	348.4	216.6	10	10	10	10	10	10	73.82
High	P13647	Keratin, type II cytoskeletal 5 OS=Homo sapiens GN=KRT5 PE=1 SV=3	TRUE	TRUE	31.1864	22	41	4	590	62.3	High	High	High	High	High	High		0.327	1.604	1.332	1.08767	0.672649	61.8433	358.6	117.3	139.8	224.2	142.1	189.3	7	7	7	7	7	7	96.4
High	Q59G75	Isoleucyl-tRNA synthetase, cytoplasmic variant (Fragment) OS=Homo sapiens OX=9606 PE=2 SV=1	FALSE	TRUE	18.9992	21	23	21	1279	146.3	High	High	High	High	High	High		0.839	0.942	0.575	0.785333	0.189294	24.1037	482.6	404.9	409	385.2	628.3	361.5	16	16	16	16	16	16	62.99
High	Q59HH3	Trifunctional purine biosynthetic protein adenosine-3 (Fragment) OS=Homo sapiens OX=9606 PE=2 SV=1	FALSE	TRUE	24.9522	21	28	21	1046	112.1	High	High	High	High	High	High		0.824	1.044	0.497	0.788333	0.275239	34.914	581.9	479.3	443.7	463.3	798.4	397	14	14	14	14	14	14	76.95
High	P02545	Prelamin-A/C OS=Homo sapiens OX=9606 GN=LMNA PE=1 SV=1	FALSE	TRUE	40.2108	21	30	21	664	74.1	High	High	High	High	High	High		0.812	0.97	0.61	0.797333	0.180448	22.6314	536.3	435.6	474.3	459.9	694.4	423.9	15	15	15	15	15	15	86.78
High	Q14566	DNA replication licensing factor MCM6 OS=Homo sapiens OX=9606 GN=MCM6 PE=1 SV=1	FALSE	TRUE	27.5274	21	24	21	821	92.8	High	High	High	High	High	High		0.805	1.023	0.565	0.797667	0.229088	28.7198	410.8	330.9	336.3	344.1	535.5	302.5	12	12	12	12	12	12	63.9
High	P68371	Tubulin beta-4B chain OS=Homo sapiens OX=9606 GN=TUBB4B PE=1 SV=1	FALSE	TRUE	71.4607	21	64	1	445	49.8	High	High	High	High	High	High		0.838	1.064	0.51	0.804	0.278561	34.6468	1537.6	1289.1	1226.6	1305.4	2088.4	1064.3	18	18	18	18	18	18	171.38
High	P49411	Elongation factor Tu, mitochondrial OS=Homo sapiens OX=9606 GN=TUFM PE=1 SV=2	FALSE	TRUE	57.0796	21	31	21	452	49.5	High	High	High	High	High	High		0.835	0.934	0.663	0.810667	0.137129	16.9156	860.3	718.6	742.1	692.8	1087.7	720.9	16	16	16	16	16	16	86.83
High	P07437	Tubulin beta chain OS=Homo sapiens OX=9606 GN=TUBB PE=1 SV=2	FALSE	TRUE	71.6216	21	68	4	444	49.6	High	High	High	High	High	High		0.831	1.094	0.516	0.813667	0.28939	35.5661	248.3	206.2	178.3	195.1	315.7	162.9	5	5	5	5	5	5	190.9
High	A8K329	cDNA FLJ76656, highly similar to Homo sapiens scaffold attachment factor B (SAFB), mRNA OS=Homo sapiens OX=9606 PE=2 SV=1	FALSE	TRUE	23.5808	21	28	21	916	102.7	High	High	High	High	High	High		0.788	1.111	0.574	0.824333	0.270337	32.7947	683.7	538.9	528.6	587.3	852	488.8	14	14	14	14	14	14	74.8
High	H3BU53	MAX gene-associated protein (Fragment) OS=Homo sapiens OX=9606 GN=MGA PE=1 SV=1	FALSE	TRUE	17.8876	21	27	2	1174	127.2	High	High	High	High	High	High		0.751	1.257	0.504	0.837333	0.383852	45.8422	23	17.3	18.5	23.2	28.4	14.3	1	1	1	1	1	1	74.87
High	Q9Y2X9	Zinc finger protein 281 OS=Homo sapiens OX=9606 GN=ZNF281 PE=1 SV=1	FALSE	TRUE	33.743	21	35	21	895	96.9	High	High	High	High	High	High		0.749	1.253	0.58	0.860667	0.35012	40.6801	1046.3	784	758	949.7	1338.7	776.7	18	18	18	18	18	18	107.09
High	Q9H0A0	RNA cytidine acetyltransferase OS=Homo sapiens OX=9606 GN=NAT10 PE=1 SV=2	FALSE	TRUE	23.0244	21	24	12	1025	115.7	High	High	High	High	High	High		0.87	1.098	0.626	0.864667	0.236045	27.299	595.9	518.7	444.3	487.7	682.5	427.2	16	16	16	16	16	16	60.81
High	Q13435	Splicing factor 3B subunit 2 OS=Homo sapiens OX=9606 GN=SF3B2 PE=1 SV=2	FALSE	TRUE	28.1564	21	29	21	895	100.2	High	High	High	High	High	High		0.81	1.214	0.578	0.867333	0.321853	37.1083	706.6	572.2	524.1	636.4	920.1	531.7	19	19	19	19	19	19	83.92
High	Q9Y2W1	Thyroid hormone receptor-associated protein 3 OS=Homo sapiens OX=9606 GN=THRAP3 PE=1 SV=2	FALSE	TRUE	22.3037	21	32	15	955	108.6	High	High	High	High	High	High		0.831	1.244	0.598	0.891	0.327153	36.7175	848.3	704.9	653.7	813	1156.8	691.3	14	14	14	14	14	14	61.55
High	Q7Z6E9	E3 ubiquitin-protein ligase RBBP6 OS=Homo sapiens OX=9606 GN=RBBP6 PE=1 SV=1	FALSE	TRUE	13.3929	21	22	21	1792	201.4	High	High	High	High	High	High		0.87	1.269	0.607	0.915333	0.33332	36.4152	279	242.8	219.7	278.8	370.2	224.7	11	11	11	11	11	11	54.11
High	Q9UKV3	Apoptotic chromatin condensation inducer in the nucleus OS=Homo sapiens OX=9606 GN=ACIN1 PE=1 SV=2	FALSE	TRUE	20.4325	21	24	21	1341	151.8	High	High	High	High	High	High		0.874	1.294	0.601	0.923	0.349089	37.8211	419.8	367	314.6	407.2	554.2	333.2	14	14	14	14	14	14	60.2
High	Q75QN2	Integrator complex subunit 8 OS=Homo sapiens OX=9606 GN=INTS8 PE=1 SV=1	FALSE	TRUE	20.3015	21	25	21	995	113	High	High	High	High	High	High		0.866	1.361	0.568	0.931667	0.400558	42.9937	598.2	518.1	416.6	567.1	751.7	427	16	16	16	16	16	16	68.5
High	O95104	Splicing factor, arginine/serine-rich 15 OS=Homo sapiens OX=9606 GN=SCAF4 PE=1 SV=3	FALSE	TRUE	23.1909	21	41	18	1147	125.8	High	High	High	High	High	High		0.907	1.456	0.671	1.01133	0.402766	39.8252	841.4	763	637.3	928.1	1103.4	740.2	16	16	16	16	16	16	115.48
High	Q9NXV6	CDKN2A-interacting protein OS=Homo sapiens OX=9606 GN=CDKN2AIP PE=1 SV=3	FALSE	TRUE	46.8966	21	25	21	580	61.1	High	High	High	High	High	High		0.964	1.463	0.699	1.042	0.387927	37.229	600.9	579.5	444.9	650.8	756.4	528.9	15	15	15	15	15	15	62.01
High	P02533	Keratin, type I cytoskeletal 14 OS=Homo sapiens OX=9606 GN=KRT14 PE=1 SV=4	TRUE	TRUE	47.4576	21	36	6	472	51.5	High	High	High	High	High	High		0.297	0.958	1.884	1.04633	0.797179	76.1879	842.6	250.5	562.5	538.9	362.6	683.3	9	9	9	9	9	9	83.07
High	Q59GY2	Ribosomal protein L4 variant (Fragment) OS=Homo sapiens OX=9606 PE=2 SV=1	FALSE	TRUE	43.5374	21	37	20	441	49	High	High	High	High	High	High		1.143	1.337	0.809	1.09633	0.267076	24.3608	1017.6	1163.3	845.8	1130.8	1296.3	1049.1	15	15	15	15	15	15	90.07
High	B4DHW5	cDNA FLJ53328, highly similar to Methylcrotonoyl-CoA carboxylase subunit alpha, mitochondrial OS=Homo sapiens OX=9606 PE=2 SV=1	FALSE	TRUE	54.0084	21	160	1	474	52.6	High	High	High	High	High	High					#DIV/0!	#DIV/0!	#DIV/0!													461.84
High	D3DTH7	Myosin IC, isoform CRA_a OS=Homo sapiens OX=9606 GN=MYO1C PE=3 SV=1	FALSE	TRUE	23.4339	21	28	1	862	98.9	High	High	High	High	High	High					#DIV/0!	#DIV/0!	#DIV/0!													67.38
High	O14980	Exportin-1 OS=Homo sapiens OX=9606 GN=XPO1 PE=1 SV=1	FALSE	TRUE	19.0476	20	22	20	1071	123.3	High	High	High	High	High	High		0.816	0.987	0.527	0.776667	0.232509	29.9368	787.4	642.5	622.1	614.3	1005.6	529.6	18	18	18	18	18	18	52.94
High	O43290	U4/U6.U5 tri-snRNP-associated protein 1 OS=Homo sapiens OX=9606 GN=SART1 PE=1 SV=1	FALSE	TRUE	31.125	20	26	20	800	90.2	High	High	High	High	High	High		0.78	1.15	0.561	0.830333	0.297708	35.8541	491.6	383.6	388.7	447	681.4	382.5	16	16	16	16	16	16	75.37
High	A0A024R7U6	DNA helicase OS=Homo sapiens OX=9606 GN=MCM4 PE=3 SV=1	FALSE	TRUE	27.81	20	24	15	863	96.5	High	High	High	High	High	High		0.807	1.1	0.641	0.849333	0.23241	27.3638	390.7	315.3	285.3	313.9	446.3	286.1	13	13	13	13	13	13	71.21
High	P51587	Breast cancer type 2 susceptibility protein OS=Homo sapiens OX=9606 GN=BRCA2 PE=1 SV=3	FALSE	TRUE	6.49503	20	20	20	3418	384	High	High	High	High	High	High		0.814	1.215	0.589	0.872667	0.317097	36.3365	322.8	262.7	249.9	303.6	438.1	258.2	12	12	12	12	12	12	42.35
High	P78347	General transcription factor II-I OS=Homo sapiens OX=9606 GN=GTF2I PE=1 SV=2	FALSE	TRUE	20.1403	20	21	20	998	112.3	High	High	High	High	High	High		0.921	1.11	0.624	0.885	0.244992	27.6827	360.1	331.7	304.5	338	468.9	292.7	15	15	15	15	15	15	48.05
High	B2R6L0	Tubulin beta chain OS=Homo sapiens OX=9606 PE=2 SV=1	FALSE	TRUE	62.9213	20	55	3	445	49.9	High	High	High	High	High	High		0.779	1.359	0.556	0.898	0.414515	46.1598	57.7	45	39.7	54	79.3	44.1	2	2	2	2	2	2	149.4
High	Q14669	E3 ubiquitin-protein ligase TRIP12 OS=Homo sapiens OX=9606 GN=TRIP12 PE=1 SV=1	FALSE	TRUE	11.496	20	21	18	1992	220.3	High	High	High	High	High	High		0.82	1.246	0.642	0.902667	0.31037	34.3836	286.3	234.7	211.2	263.1	377.7	242.3	12	12	12	12	12	12	52.49
High	Q5W009	RNA binding motif protein 17, isoform CRA_a OS=Homo sapiens OX=9606 GN=RBM17 PE=2 SV=1	FALSE	TRUE	47.1322	20	33	20	401	44.9	High	High	High	High	High	High		0.819	1.339	0.585	0.914333	0.385934	42.2094	703.3	575.9	520.7	696.9	935.5	547.3	16	16	16	16	16	16	99.37
High	P08779	Keratin, type I cytoskeletal 16 OS=Homo sapiens GN=KRT16 PE=1 SV=4	TRUE	TRUE	44.6089	20	33	10	473	51.2	High	High	High	High	High	High		0.301	0.318	2.619	1.07933	1.33342	123.541	201.2	60.6	353.3	112.5	66.7	174.7	5	5	5	5	5	5	85.05
High	Q14203	Dynactin subunit 1 OS=Homo sapiens OX=9606 GN=DCTN1 PE=1 SV=3	FALSE	TRUE	15.6495	19	20	18	1278	141.6	High	High	High	High	High	High		0.803	0.953	0.48	0.745333	0.241715	32.4305	199.5	160.2	150.6	143.5	271.7	130.5	10	10	10	10	10	10	43.99
High	P14868	Aspartate--tRNA ligase, cytoplasmic OS=Homo sapiens OX=9606 GN=DARS PE=1 SV=2	FALSE	TRUE	40.7186	19	20	19	501	57.1	High	High	High	High	High	High		0.786	0.9	0.592	0.759333	0.155722	20.5077	452.1	355.6	368	331	548.8	325.1	15	15	15	15	15	15	47.14
High	P54136	Arginine--tRNA ligase, cytoplasmic OS=Homo sapiens OX=9606 GN=RARS PE=1 SV=2	FALSE	TRUE	37.4242	19	23	19	660	75.3	High	High	High	High	High	High		0.837	0.908	0.538	0.761	0.196359	25.8028	479.4	401.3	402.3	365.2	617.4	332	14	14	14	14	14	14	64.1
High	P04350	Tubulin beta-4A chain OS=Homo sapiens OX=9606 GN=TUBB4A PE=1 SV=2	FALSE	TRUE	66.6667	19	53	3	444	49.6	High	High	High	High	High	High		0.817	0.969	0.527	0.771	0.224562	29.126	36.1	29.5	35	33.9	55.8	29.4	1	1	1	1	1	1	134.31
High	Q7L2E3	ATP-dependent RNA helicase DHX30 OS=Homo sapiens OX=9606 GN=DHX30 PE=1 SV=1	FALSE	TRUE	19.6817	19	19	19	1194	133.9	High	High	High	High	High	High		0.831	0.915	0.569	0.771667	0.18047	23.387	413.3	343.3	336.6	308.1	529.5	301.2	11	11	11	11	11	11	35.51
High	F5H5D3	Tubulin alpha chain OS=Homo sapiens OX=9606 GN=TUBA1C PE=1 SV=1	FALSE	TRUE	48.1696	19	62	7	519	57.7	High	High	High	High	High	High		0.857	1.019	0.505	0.793667	0.262788	33.1106	2111.2	1809.4	1635	1666.4	2761.8	1395.6	14	14	14	14	14	14	174.25
High	P50851	Lipopolysaccharide-responsive and beige-like anchor protein OS=Homo sapiens OX=9606 GN=LRBA PE=1 SV=4	FALSE	TRUE	6.98568	19	20	19	2863	318.9	High	High	High	High	High	High		0.902	1.007	0.583	0.830667	0.220817	26.5832	222.3	200.5	191.2	192.5	306.7	178.7	10	10	10	10	10	10	41.95
High	A0A024R711	E3 ubiquitin-protein ligase OS=Homo sapiens OX=9606 GN=WWP2 PE=4 SV=1	FALSE	TRUE	24.023	19	22	16	870	98.9	High	High	High	High	High	High		0.795	1.078	0.632	0.835	0.225675	27.0269	583.6	463.7	456.9	492.6	733.7	463.5	15	15	15	15	15	15	57.2
High	O15047	Histone-lysine N-methyltransferase SETD1A OS=Homo sapiens OX=9606 GN=SETD1A PE=1 SV=3	FALSE	TRUE	13.0639	19	21	19	1707	185.9	High	High	High	High	High	High		0.77	1.275	0.611	0.885333	0.346699	39.1603	264	203.3	207.9	265	346.4	211.8	9	9	9	9	9	9	56.83
High	A8K8Y8	cDNA FLJ77796, highly similar to Homo sapiens evolutionarily conserved G-patch domain containing protein mRNA OS=Homo sapiens OX=9606 PE=2 SV=1	FALSE	TRUE	26.5306	19	26	19	931	103.3	High	High	High	High	High	High		0.84	1.246	0.571	0.885667	0.339809	38.3676	743.9	625.2	554.5	691	994.8	567.9	12	12	12	12	12	12	62.49
High	B2R623	mRNA-capping enzyme OS=Homo sapiens OX=9606 PE=2 SV=1	FALSE	TRUE	38.191	19	27	19	597	68.4	High	High	High	High	High	High		0.833	1.201	0.65	0.894667	0.280628	31.3668	927.7	772.7	702.9	844.3	1126.1	732.4	18	18	18	18	18	18	66.95
High	Q9NYF8	Bcl-2-associated transcription factor 1 OS=Homo sapiens OX=9606 GN=BCLAF1 PE=1 SV=2	FALSE	TRUE	24.4565	19	21	18	920	106.1	High	High	High	High	High	High		0.832	1.292	0.595	0.906333	0.354396	39.1021	389.6	324.1	303.1	391.6	555.9	330.7	13	13	13	13	13	13	48.98
High	F2Z2U4	Transformation/transcription domain-associated protein OS=Homo sapiens OX=9606 GN=TRRAP PE=1 SV=3	FALSE	TRUE	5.82121	19	19	19	3848	435.9	High	High	High	High	High	High		1.016	1.131	0.622	0.923	0.26694	28.9209	149.3	151.7	138.7	156.9	210.7	131.1	8	8	8	8	8	8	45.39
High	Q6P2Q9	Pre-mRNA-processing-splicing factor 8 OS=Homo sapiens OX=9606 GN=PRPF8 PE=1 SV=2	FALSE	TRUE	10.1927	19	19	18	2335	273.4	High	High	High	High	High	High		0.864	1.154	0.758	0.925333	0.205001	22.1543	282.9	244.3	231	266.6	336.1	254.9	11	11	11	11	11	11	44.33
High	A0A024R652	Methylenetetrahydrofolate dehydrogenase (NADP+ dependent) 1, methenyltetrahydrofolate cyclohydrolase, formyltetrahydrofolate synthetase, isoform CRA_a OS=Homo sapiens OX=9606 GN=MTHFD1 PE=3 SV=1	FALSE	TRUE	23.2086	19	21	18	935	101.5	High	High	High	High	High	High		0.98	1.094	0.779	0.951	0.15949	16.7707	571.8	560.4	530.2	579.8	712.1	554.7	17	17	17	17	17	17	56.34
High	A0A0D9SF53	ATP-dependent RNA helicase DDX3X OS=Homo sapiens OX=9606 GN=DDX3X PE=1 SV=1	FALSE	TRUE	31.3779	19	24	19	733	81.4	High	High	High	High	High	High		0.989	1.167	0.751	0.969	0.20872	21.5397	226.6	224.1	200.9	234.4	287.5	215.8	10	10	10	10	10	10	55.18
High	O60885	Bromodomain-containing protein 4 OS=Homo sapiens OX=9606 GN=BRD4 PE=1 SV=2	FALSE	TRUE	14.6843	19	23	17	1362	152.1	High	High	High	High	High	High		0.944	1.381	0.685	1.00333	0.351773	35.0604	507.9	479.4	398.9	550.8	676.8	463.8	13	13	13	13	13	13	56.33
High	P18615	Negative elongation factor E OS=Homo sapiens OX=9606 GN=NELFE PE=1 SV=3	FALSE	TRUE	52.6316	19	34	18	380	43.2	High	High	High	High	High	High		0.91	1.481	0.623	1.00467	0.436763	43.4735	758.5	690	549.6	814.1	1062.2	661.8	19	19	19	19	19	19	103.14
High	P02769	Serum albumin OS=Bos taurus GN=ALB PE=1 SV=4	TRUE	FALSE	31.1367	19	20	19	607	69.2	High	High	High	High	High	High		0.823	1.705	0.634	1.054	0.571648	54.236	421	346.6	311.3	530.6	469.7	297.7	16	16	16	16	16	16	51.84
High	Q5XQN5	Keratin, type II cytoskeletal 5 OS=Bos taurus GN=KRT5 PE=1 SV=1	TRUE	TRUE	21.797	19	44	0	601	62.9	Not Found	Not Found	Not Found	Not Found	Not Found	Not Found		0.265	1.629	1.349	1.081	0.720411	66.643	507.8	134.6	141.8	231	173	233.3	1	1	1	1	1	1	104
High	P68366	Tubulin alpha-4A chain OS=Homo sapiens OX=9606 GN=TUBA4A PE=1 SV=1	FALSE	TRUE	53.7946	18	57	6	448	49.9	High	High	High	High	High	High		0.844	0.973	0.496	0.771	0.246737	32.0022	306.5	258.6	236	229.6	383.5	190.3	5	5	5	5	5	5	159.05
High	Q9BQG0	Myb-binding protein 1A OS=Homo sapiens OX=9606 GN=MYBBP1A PE=1 SV=2	FALSE	TRUE	15.6627	18	20	18	1328	148.8	High	High	High	High	High	High		0.867	0.964	0.508	0.779667	0.240217	30.8103	368.4	319.3	279.1	269.2	473.2	240.3	11	11	11	11	11	11	50.12
High	P0CAP2	DNA-directed RNA polymerase II subunit GRINL1A OS=Homo sapiens OX=9606 GN=POLR2M PE=1 SV=1	FALSE	TRUE	65.4891	18	23	18	368	41.7	High	High	High	High	High	High		0.673	1.197	0.471	0.780333	0.374712	48.0195	485.1	326.3	348.6	417.3	613	288.9	11	11	11	11	11	11	68.89
High	A0A024R3X4	Heat shock 60kDa protein 1 (Chaperonin), isoform CRA_a OS=Homo sapiens OX=9606 GN=HSPD1 PE=2 SV=1	FALSE	TRUE	41.5358	18	24	17	573	61	High	High	High	High	High	High		0.92	0.79	0.662	0.790667	0.129001	16.3155	497.6	457.9	548.2	433.2	688.3	455.5	14	14	14	14	14	14	72.64
High	A0A024R5Z7	Annexin OS=Homo sapiens OX=9606 GN=ANXA2 PE=3 SV=1	FALSE	TRUE	55.4572	18	25	18	339	38.6	High	High	High	High	High	High		0.748	0.991	0.677	0.805333	0.164664	20.4467	661.5	494.9	594.3	588.7	787.9	533.3	14	14	14	14	14	14	71.17
High	B9EG70	Nuclear protein, ataxia-telangiectasia locus OS=Homo sapiens OX=9606 GN=NPAT PE=2 SV=1	FALSE	TRUE	14.8563	18	20	18	1427	154.2	High	High	High	High	High	High		0.701	1.185	0.54	0.808667	0.335709	41.5139	432.4	302.9	333.7	395.6	587.2	317.1	13	13	13	13	13	13	50.64
High	P38919	Eukaryotic initiation factor 4A-III OS=Homo sapiens OX=9606 GN=EIF4A3 PE=1 SV=4	FALSE	TRUE	37.2263	18	27	15	411	46.8	High	High	High	High	High	High		0.853	1.002	0.601	0.818667	0.202693	24.7589	583.5	497.5	466.3	467.3	715.7	430.2	14	14	14	14	14	14	61.74
High	A3F768	NF-kappaB repressing factor OS=Homo sapiens OX=9606 GN=NRF PE=2 SV=1	FALSE	TRUE	25.6522	18	21	18	690	77.5	High	High	High	High	High	High		0.781	1.099	0.608	0.829333	0.249043	30.0293	268.3	209.5	225.5	247.7	357.3	217.2	11	11	11	11	11	11	46.77
High	B2RCM2	cDNA, FLJ96156, highly similar to Homo sapiens leucyl-tRNA synthetase (LARS), mRNA OS=Homo sapiens OX=9606 PE=2 SV=1	FALSE	TRUE	17.7721	18	22	18	1176	134.4	High	High	High	High	High	High		1.005	0.931	0.564	0.833333	0.236166	28.3399	382.3	384.2	331.7	308.9	452.8	255.2	14	14	14	14	14	14	56.89
High	Q86YA3	Protein ZGRF1 OS=Homo sapiens OX=9606 GN=ZGRF1 PE=1 SV=3	FALSE	TRUE	11.3118	18	20	17	2104	236.5	High	High	High	High	High	High		0.742	1.243	0.572	0.852333	0.348841	40.9278	378.4	281	266.3	331	469.1	268.1	13	13	13	13	13	13	52.55
High	Q7Z3D7	Uncharacterized protein DKFZp686E2459 OS=Homo sapiens OX=9606 GN=DKFZp686E2459 PE=2 SV=1	FALSE	TRUE	18.2915	18	22	14	995	110.3	High	High	High	High	High	High		0.819	1.144	0.616	0.859667	0.266339	30.9816	282.7	231.6	211.9	242.4	341.2	210.3	13	13	13	13	13	13	52.5
High	O95239	Chromosome-associated kinesin KIF4A OS=Homo sapiens OX=9606 GN=KIF4A PE=1 SV=3	FALSE	TRUE	14.6104	18	19	18	1232	139.8	High	High	High	High	High	High		0.805	1.188	0.587	0.86	0.304252	35.3781	331.8	267	259.8	308.5	436.1	256.2	13	13	13	13	13	13	42.98
High	Q99623	Prohibitin-2 OS=Homo sapiens OX=9606 GN=PHB2 PE=1 SV=2	FALSE	TRUE	54.8495	18	27	18	299	33.3	High	High	High	High	High	High		0.915	1.001	0.705	0.873667	0.152267	17.4285	474.1	433.9	393.2	393.5	589.5	415.7	13	13	13	13	13	13	63.2
High	P11216	Glycogen phosphorylase, brain form OS=Homo sapiens OX=9606 GN=PYGB PE=1 SV=5	FALSE	TRUE	25.9786	18	20	14	843	96.6	High	High	High	High	High	High		0.997	1.061	0.764	0.940667	0.156308	16.6168	221.8	221.1	192.5	204.3	245.7	187.6	11	11	11	11	11	11	46.75
High	A3KN83	Protein strawberry notch homolog 1 OS=Homo sapiens OX=9606 GN=SBNO1 PE=1 SV=1	FALSE	TRUE	14.3575	18	23	18	1393	154.2	High	High	High	High	High	High		0.816	1.467	0.565	0.949333	0.465547	49.0394	476.1	388.8	320.6	470.2	618.9	349.4	13	13	13	13	13	13	64.75
High	A8K492	cDNA FLJ76789, highly similar to Homo sapiens methionine-tRNA synthetase (MARS), mRNA OS=Homo sapiens OX=9606 PE=2 SV=1	FALSE	TRUE	24.1111	17	22	17	900	101.1	High	High	High	High	High	High		0.792	0.958	0.511	0.753667	0.225952	29.9804	384.9	304.8	303.6	291	486.3	248.4	14	14	14	14	14	14	56.2
High	Q92541	RNA polymerase-associated protein RTF1 homolog OS=Homo sapiens OX=9606 GN=RTF1 PE=1 SV=4	FALSE	TRUE	22.5352	17	22	17	710	80.3	High	High	High	High	High	High		0.673	1.189	0.508	0.79	0.355256	44.9691	569.1	382.7	371.9	442.1	699.8	355.4	14	14	14	14	14	14	51.33
High	P52701	DNA mismatch repair protein Msh6 OS=Homo sapiens OX=9606 GN=MSH6 PE=1 SV=2	FALSE	TRUE	14.4853	17	17	17	1360	152.7	High	High	High	High	High	High		0.803	1.058	0.521	0.794	0.268613	33.8304	276	221.7	212.1	224.4	379.8	197.9	9	9	9	9	9	9	44.47
High	Q9GZR7	ATP-dependent RNA helicase DDX24 OS=Homo sapiens OX=9606 GN=DDX24 PE=1 SV=1	FALSE	TRUE	19.4412	17	20	17	859	96.3	High	High	High	High	High	High		0.804	0.988	0.594	0.795333	0.197143	24.7875	440.3	354.1	364.7	360.4	578.2	343.7	12	12	12	12	12	12	43.04
High	Q9UHB7	AF4/FMR2 family member 4 OS=Homo sapiens OX=9606 GN=AFF4 PE=1 SV=1	FALSE	TRUE	15.6492	17	22	16	1163	127.4	High	High	High	High	High	High		0.713	1.14	0.542	0.798333	0.307997	38.58	377	268.8	277.7	316.6	485	263	13	13	13	13	13	13	49.22
High	Q9NUU7	ATP-dependent RNA helicase DDX19A OS=Homo sapiens OX=9606 GN=DDX19A PE=1 SV=1	FALSE	TRUE	37.6569	17	18	17	478	53.9	High	High	High	High	High	High		0.784	1.139	0.474	0.799	0.332754	41.6463	288.7	226.4	201	229	393.6	186.5	11	11	11	11	11	11	40.69
High	O14646	Chromodomain-helicase-DNA-binding protein 1 OS=Homo sapiens OX=9606 GN=CHD1 PE=1 SV=2	FALSE	TRUE	10.1754	17	18	12	1710	196.6	High	High	High	High	High	High		0.801	1.079	0.56	0.813333	0.25972	31.9328	391.8	314	299.9	323.7	483	270.7	14	14	14	14	14	14	39.76
High	Q14527	Helicase-like transcription factor OS=Homo sapiens OX=9606 GN=HLTF PE=1 SV=2	FALSE	TRUE	18.1368	17	18	17	1009	113.9	High	High	High	High	High	High		0.821	1.065	0.602	0.829333	0.231612	27.9275	206.7	169.6	171.4	182.5	285.2	171.6	10	10	10	10	10	10	45.43
High	P35251	Replication factor C subunit 1 OS=Homo sapiens OX=9606 GN=RFC1 PE=1 SV=4	FALSE	TRUE	16.9861	17	19	17	1148	128.2	High	High	High	High	High	High		0.883	1.042	0.567	0.830667	0.241786	29.1074	442.2	390.5	423.3	441.2	716.2	406.2	15	15	15	15	15	15	53.75
High	Q53GS0	G protein-binding protein CRFG variant (Fragment) OS=Homo sapiens OX=9606 PE=2 SV=1	FALSE	TRUE	33.4385	17	22	17	634	73.8	High	High	High	High	High	High		0.841	1.009	0.651	0.833667	0.179113	21.4849	400.6	336.8	339.8	342.9	517.2	336.9	14	14	14	14	14	14	60.4
High	Q9UIG0	Tyrosine-protein kinase BAZ1B OS=Homo sapiens OX=9606 GN=BAZ1B PE=1 SV=2	FALSE	TRUE	12.4073	17	18	17	1483	170.8	High	High	High	High	High	High		0.951	1.06	0.528	0.846333	0.28102	33.2044	192.8	183.3	158.3	167.8	268.5	141.8	8	8	8	8	8	8	46.43
High	O94906	Pre-mRNA-processing factor 6 OS=Homo sapiens OX=9606 GN=PRPF6 PE=1 SV=1	FALSE	TRUE	17.4283	17	18	17	941	106.9	High	High	High	High	High	High		0.888	1.104	0.569	0.853667	0.269147	31.5284	589	522.9	464.5	512.9	780.8	444	16	16	16	16	16	16	35.41
High	A8QI98	DIS3 OS=Homo sapiens OX=9606 PE=2 SV=1	FALSE	TRUE	19.3111	17	17	17	958	109	High	High	High	High	High	High		0.844	1.095	0.633	0.857333	0.231288	26.9777	276.2	233.1	217.9	238.6	353	223.6	9	9	9	9	9	9	31.81
High	P39023	60S ribosomal protein L3 OS=Homo sapiens OX=9606 GN=RPL3 PE=1 SV=2	FALSE	TRUE	40.1985	17	24	17	403	46.1	High	High	High	High	High	High		0.963	1.004	0.673	0.88	0.180436	20.504	619.5	596.6	623.9	626.4	895.1	602.1	15	15	15	15	15	15	62.48
High	Q6P9B9	Integrator complex subunit 5 OS=Homo sapiens OX=9606 GN=INTS5 PE=1 SV=1	FALSE	TRUE	20.1178	17	21	17	1019	107.9	High	High	High	High	High	High		0.799	1.224	0.624	0.882333	0.308558	34.9707	398	318.1	299.1	366	504.3	314.6	13	13	13	13	13	13	55.95
High	B2R8R5	cDNA, FLJ94025, highly similar to Homo sapiens tripartite motif-containing 28 (TRIM28), mRNA OS=Homo sapiens OX=9606 PE=2 SV=1	FALSE	TRUE	31.497	17	22	17	835	88.5	High	High	High	High	High	High		0.834	1.132	0.709	0.891667	0.217316	24.3719	342.6	285.8	291	329.4	440.6	312.6	11	11	11	11	11	11	60.78
High	A8K6G9	cDNA FLJ76871, highly similar to Homo sapiens DEAH (Asp-Glu-Ala-His) box polypeptide 38 (DHX38), mRNA OS=Homo sapiens OX=9606 PE=2 SV=1	FALSE	TRUE	16.2184	17	19	17	1227	140.4	High	High	High	High	High	High		0.884	1.217	0.581	0.894	0.318118	35.5837	158.6	140.1	128.5	156.4	222	129	8	8	8	8	8	8	49.76
High	Q02241	Kinesin-like protein KIF23 OS=Homo sapiens OX=9606 GN=KIF23 PE=1 SV=3	FALSE	TRUE	23.3333	17	19	17	960	110	High	High	High	High	High	High		0.855	1.361	0.589	0.935	0.392168	41.9431	318.2	272.2	242.8	330.6	418.8	246.7	15	15	15	15	15	15	55.43
High	P05023	Sodium/potassium-transporting ATPase subunit alpha-1 OS=Homo sapiens OX=9606 GN=ATP1A1 PE=1 SV=1	FALSE	TRUE	19.8436	16	21	11	1023	112.8	High	High	High	High	High	High		0.782	0.834	0.491	0.702333	0.184858	26.3205	277.2	216.7	229.3	191.3	364.2	179	12	12	12	12	12	12	60.34
High	Q5EC54	Heterogeneous nuclear ribonucleoprotein K transcript variant OS=Homo sapiens OX=9606 GN=HNRPK PE=2 SV=1	FALSE	TRUE	39.0086	16	24	16	464	51	High	High	High	High	High	High		0.665	0.981	0.513	0.719667	0.238741	33.1739	488.2	324.6	397.3	389.8	620.9	318.7	12	12	12	12	12	12	57.99
High	A8K3A8	cDNA FLJ75085, highly similar to Homo sapiens glutaminyl-tRNA synthetase (QARS), mRNA OS=Homo sapiens OX=9606 PE=2 SV=1	FALSE	TRUE	22.8387	16	16	15	775	87.8	High	High	High	High	High	High		0.83	0.885	0.567	0.760667	0.16996	22.3435	247.5	205.4	215.8	190.9	326.5	185.2	9	9	9	9	9	9	37.37
High	A0A0S2Z4Z0	RNA binding motif protein 14 isoform 1 (Fragment) OS=Homo sapiens OX=9606 GN=RBM14 PE=2 SV=1	FALSE	TRUE	28.1016	16	23	16	669	69.4	High	High	High	High	High	High		0.683	1.053	0.553	0.763	0.259422	34.0003	536.5	366.4	414.4	436.6	683.2	377.6	12	12	12	12	12	12	56.27
High	Q9NZB2	Constitutive coactivator of PPAR-gamma-like protein 1 OS=Homo sapiens OX=9606 GN=FAM120A PE=1 SV=2	FALSE	TRUE	19.2308	16	19	16	1118	121.8	High	High	High	High	High	High		0.786	1.013	0.536	0.778333	0.238592	30.6543	343.4	269.8	265	268.4	471.5	252.5	14	14	14	14	14	14	55.25
High	A0A024RAH8	RNA helicase OS=Homo sapiens OX=9606 GN=DDX18 PE=3 SV=1	FALSE	TRUE	25.0746	16	21	16	670	75.4	High	High	High	High	High	High		0.82	1.006	0.591	0.805667	0.207871	25.8011	530.5	434.9	420.5	423.1	672.9	397.7	13	13	13	13	13	13	59.71
High	Q643R0	HCTP4 OS=Homo sapiens OX=9606 GN=HCTP4 PE=1 SV=1	FALSE	TRUE	27.9786	16	20	16	747	85.6	High	High	High	High	High	High		0.783	1.092	0.555	0.81	0.269516	33.2736	525.8	411.7	424.5	463.4	671.5	373	13	13	13	13	13	13	52.07
High	Q5UIP0	Telomere-associated protein RIF1 OS=Homo sapiens OX=9606 GN=RIF1 PE=1 SV=2	FALSE	TRUE	6.43204	16	16	16	2472	274.3	High	High	High	High	High	High		0.84	1.061	0.563	0.821333	0.249524	30.3804	239.7	201.3	200.6	212.7	310.4	174.9	9	9	9	9	9	9	34.52
High	P55199	RNA polymerase II elongation factor ELL OS=Homo sapiens OX=9606 GN=ELL PE=1 SV=1	FALSE	TRUE	29.9517	16	18	16	621	68.2	High	High	High	High	High	High		0.778	1.095	0.654	0.842333	0.22743	27	309.5	240.7	279	305.5	401.1	262.5	10	10	10	10	10	10	45.8
High	Q8N3C0	Activating signal cointegrator 1 complex subunit 3 OS=Homo sapiens OX=9606 GN=ASCC3 PE=1 SV=3	FALSE	TRUE	7.94732	16	17	16	2202	251.3	High	High	High	High	High	High		0.799	1.124	0.605	0.842667	0.262241	31.1204	229	182.9	190.5	214.2	299.2	181.1	8	8	8	8	8	8	40.73
High	Q9NQG5	Regulation of nuclear pre-mRNA domain-containing protein 1B OS=Homo sapiens OX=9606 GN=RPRD1B PE=1 SV=1	FALSE	TRUE	51.227	16	35	13	326	36.9	High	High	High	High	High	High		0.785	1.197	0.573	0.851667	0.317297	37.256	728.9	572.5	560.1	670.3	1012	579.6	15	15	15	15	15	15	88.03
High	A8K7F6	cDNA FLJ78244, highly similar to Homo sapiens eukaryotic translation initiation factor 4A, isoform 1 (EIF4A1), mRNA OS=Homo sapiens OX=9606 PE=2 SV=1	FALSE	TRUE	42.1182	16	24	8	406	46.1	High	High	High	High	High	High		0.891	1.089	0.603	0.861	0.244385	28.3838	347.6	309.8	289.6	315.4	449	270.8	12	12	12	12	12	12	72.68
High	A0A024R3T8	Poly [ADP-ribose] polymerase OS=Homo sapiens OX=9606 GN=PARP1 PE=4 SV=1	FALSE	TRUE	18.5404	16	18	16	1014	113	High	High	High	High	High	High		0.848	1.151	0.587	0.862	0.282261	32.7448	371	314.7	313.1	360.3	490.1	287.7	14	14	14	14	14	14	53.39
High	P25690	Keratin, type I microfibrillar, 47.6 kDa OS=Ovis aries PE=3 SV=2	TRUE	FALSE	38.8614	16	29	7	404	46	High	High	High	High	High	High		0.034	1.754	0.84	0.876	0.860565	98.238	3232.7	110	58.4	102.4	111	93.2	13	11	9	11	10	12	71.71
High	Q96J02	E3 ubiquitin-protein ligase Itchy homolog OS=Homo sapiens OX=9606 GN=ITCH PE=1 SV=2	FALSE	TRUE	21.4839	16	21	13	903	102.7	High	High	High	High	High	High		0.86	1.122	0.647	0.876333	0.237921	27.1496	272.3	234.3	213.4	239.5	339.8	220	10	10	10	10	10	10	53.52
High	P50991	T-complex protein 1 subunit delta OS=Homo sapiens OX=9606 GN=CCT4 PE=1 SV=4	FALSE	TRUE	32.4675	16	20	16	539	57.9	High	High	High	High	High	High		0.913	0.978	0.78	0.890333	0.100927	11.3359	403.4	368.4	365.6	357.7	484.4	377.7	12	12	12	12	12	12	57.62
High	Q59EC0	Adenosine deaminase, RNA-specific isoform ADAR-a variant (Fragment) OS=Homo sapiens OX=9606 PE=2 SV=1	FALSE	TRUE	12.7814	16	16	16	1244	137.7	High	High	High	High	High	High		0.884	1.054	0.744	0.894	0.155242	17.3648	382.2	338	354.6	373.8	486.3	361.7	12	12	12	12	12	12	29.16
High	B7ZLQ5	Probable global transcription activator SNF2L1 OS=Homo sapiens OX=9606 GN=SMARCA1 PE=1 SV=1	FALSE	TRUE	12.243	16	17	4	1070	124.2	High	High	High	High	High	High		0.789	1.214	0.68	0.894333	0.282153	31.549	48.5	38.3	40.7	49.4	60.3	41	3	3	3	3	3	3	34.92
High	Q8IY81	pre-rRNA processing protein FTSJ3 OS=Homo sapiens OX=9606 GN=FTSJ3 PE=1 SV=2	FALSE	TRUE	27.863	16	18	16	847	96.5	High	High	High	High	High	High		0.884	1.122	0.784	0.93	0.173632	18.6701	419.3	370.7	354.4	397.5	505.2	396.2	15	15	15	15	15	15	53.65
High	J3KR72	Transcription initiation factor TFIID subunit 6 OS=Homo sapiens OX=9606 GN=TAF6 PE=1 SV=1	FALSE	TRUE	26.8392	16	19	16	734	78.9	High	High	High	High	High	High		0.898	1.302	0.684	0.961333	0.31383	32.6453	341.9	307.2	265.9	346.3	423.2	289.5	13	13	13	13	13	13	46.12
High	Q13573	SNW domain-containing protein 1 OS=Homo sapiens OX=9606 GN=SNW1 PE=1 SV=1	FALSE	TRUE	31.3433	16	19	16	536	61.5	High	High	High	High	High	High		0.868	1.441	0.711	1.00667	0.384248	38.1703	470.7	408.5	350.8	505.5	583.1	414.5	14	14	14	14	14	14	45.21
High	A0A0X1KG71	Negative elongation factor B OS=Homo sapiens OX=9606 GN=NELFB PE=1 SV=1	FALSE	TRUE	25.3185	16	20	15	628	70	High	High	High	High	High	High		1.045	1.554	0.714	1.10433	0.423132	38.3156	325.6	340.1	237.4	368.9	409.1	291.9	12	12	12	12	12	12	57.56
High	Q05D98	AFF1 protein (Fragment) OS=Homo sapiens OX=9606 GN=AFF1 PE=2 SV=1	FALSE	TRUE	44.0964	16	21	1	415	45.9	High	High	High	High	High	High					#DIV/0!	#DIV/0!	#DIV/0!													52.97
High	P25691	Keratin, type II microfibrillar, component 5 OS=Ovis aries PE=1 SV=1	TRUE	FALSE	29.4821	15	25	3	502	55.2	High	High	High	High	High	High		0.09	1.217	0.815	0.707333	0.571162	80.7487	474.1	42.8	34.8	42.3	49.8	40.6	5	5	5	5	3	5	54.95
High	A0A0S2Z5J4	Adaptor-related protein complex 3 beta 1 subunit isoform 1 (Fragment) OS=Homo sapiens OX=9606 GN=AP3B1 PE=2 SV=1	FALSE	TRUE	15.6307	15	16	15	1094	121.2	High	High	High	High	High	High		0.637	1.035	0.528	0.733333	0.266875	36.3921	278.2	177.1	188.6	195.2	315.3	166.6	10	10	10	10	10	10	36.67
High	P50454	Serpin H1 OS=Homo sapiens OX=9606 GN=SERPINH1 PE=1 SV=2	FALSE	TRUE	44.2584	15	16	15	418	46.4	High	High	High	High	High	High		0.739	0.986	0.544	0.756333	0.221509	29.2872	425.2	314.2	317.4	312.8	522.8	284.6	10	10	10	10	10	10	41.59
High	P04083	Annexin A1 OS=Homo sapiens OX=9606 GN=ANXA1 PE=1 SV=2	FALSE	TRUE	50	15	20	15	346	38.7	High	High	High	High	High	High		0.81	0.897	0.586	0.764333	0.16045	20.9922	360.7	292.2	375.2	336.5	461.6	270.6	10	10	10	10	10	10	48.51
High	B0YIW6	Archain 1, isoform CRA_a OS=Homo sapiens OX=9606 GN=ARCN1 PE=1 SV=1	FALSE	TRUE	26.087	15	18	15	552	61.6	High	High	High	High	High	High		0.826	0.993	0.495	0.771333	0.253461	32.8601	608.4	502.4	481.2	477.9	807.2	399.4	10	10	10	10	10	10	37.35
High	Q59EI9	ADP,ATP carrier protein, liver isoform T2 variant (Fragment) OS=Homo sapiens OX=9606 PE=2 SV=1	FALSE	TRUE	40.5573	15	32	2	323	35.4	High	High	High	High	High	High		0.804	0.974	0.54	0.772667	0.21869	28.3033	371.5	298.6	288.4	280.8	459.6	248.3	6	6	6	6	6	6	76.01
High	A0A140VJS3	Testicular tissue protein Li 149 OS=Homo sapiens OX=9606 PE=2 SV=1	FALSE	TRUE	46.5517	15	21	14	406	45.6	High	High	High	High	High	High		0.803	0.983	0.559	0.781667	0.212804	27.2243	449.5	360.8	369.5	363.1	590.2	330.2	12	12	12	12	12	12	58.28
High	Q6NVC0	SLC25A5 protein (Fragment) OS=Homo sapiens OX=9606 GN=SLC25A5 PE=2 SV=1	FALSE	TRUE	39.0093	15	42	5	323	35.3	High	High	High	High	High	High		0.83	0.966	0.556	0.784	0.208835	26.6371	1369.1	1136.3	1068.3	1031.7	1791.4	995.5	17	17	17	17	17	17	109.55
High	Q8WYP5	Protein ELYS OS=Homo sapiens OX=9606 GN=AHCTF1 PE=1 SV=3	FALSE	TRUE	8.56134	15	15	15	2266	252.3	High	High	High	High	High	High		0.732	1.019	0.603	0.784667	0.212942	27.1379	188.6	138	150.5	153.3	245.9	148.3	8	8	8	8	8	8	33.87
High	B7ZM99	MTHFD1L protein OS=Homo sapiens OX=9606 GN=MTHFD1L PE=1 SV=1	FALSE	TRUE	15.2196	15	16	14	979	105.8	High	High	High	High	High	High		0.858	0.897	0.604	0.786333	0.159105	20.2338	156.9	134.6	144.7	129.8	204.7	123.7	6	6	6	6	6	6	33.79
High	P29083	General transcription factor IIE subunit 1 OS=Homo sapiens OX=9606 GN=GTF2E1 PE=1 SV=2	FALSE	TRUE	43.2802	15	25	15	439	49.4	High	High	High	High	High	High		0.736	1.172	0.483	0.797	0.348527	43.7298	786.8	578.7	563.1	659.7	985.4	475.8	14	14	14	14	14	14	83.39
High	Q6UB99	Ankyrin repeat domain-containing protein 11 OS=Homo sapiens OX=9606 GN=ANKRD11 PE=1 SV=3	FALSE	TRUE	6.04581	15	17	15	2663	297.7	High	High	High	High	High	High		0.776	1.079	0.551	0.802	0.264958	33.0372	230.5	178.9	191.1	206.2	326.2	179.8	9	9	9	9	9	9	37.16
High	A0A024RDU9	General transcription factor IIF subunit 2 OS=Homo sapiens OX=9606 GN=GTF2F2 PE=3 SV=1	FALSE	TRUE	65.4618	15	24	15	249	28.4	High	High	High	High	High	High		0.764	1.141	0.509	0.804667	0.317956	39.5141	824.4	629.5	620.6	708.3	1105	562.2	14	14	14	14	14	14	57.87
High	B4DL07	cDNA FLJ53353, highly similar to ATP-binding cassette sub-family D member 3 OS=Homo sapiens OX=9606 PE=2 SV=1	FALSE	TRUE	22.2548	15	16	14	683	78.4	High	High	High	High	High	High		0.908	0.943	0.573	0.808	0.204267	25.2806	441.6	401.2	369	348.1	594.5	340.4	14	14	14	14	14	14	39.12
High	P35269	General transcription factor IIF subunit 1 OS=Homo sapiens OX=9606 GN=GTF2F1 PE=1 SV=2	FALSE	TRUE	30.1741	15	21	15	517	58.2	High	High	High	High	High	High		0.725	1.217	0.486	0.809333	0.372726	46.0534	576.9	418.2	385	468.4	746.2	362.4	12	12	12	12	12	12	53.11
High	A0A0S2Z4Z9	Non-POU domain containing octamer-binding isoform 1 (Fragment) OS=Homo sapiens OX=9606 GN=NONO PE=2 SV=1	FALSE	TRUE	29.2994	15	23	13	471	54.2	High	High	High	High	High	High		0.807	1.002	0.64	0.816333	0.18118	22.1944	505.7	408.2	429.7	430.4	632.6	404.8	12	12	12	12	12	12	59.14
High	Q15652	Probable JmjC domain-containing histone demethylation protein 2C OS=Homo sapiens OX=9606 GN=JMJD1C PE=1 SV=2	FALSE	TRUE	6.1811	15	15	15	2540	284.3	High	High	High	High	High	High		0.732	1.143	0.605	0.826667	0.281216	34.018	390.5	285.7	295.3	337.6	516.8	312.6	9	9	9	9	9	9	33.7
High	V9HW31	ATP synthase subunit beta OS=Homo sapiens OX=9606 GN=HEL-S-271 PE=1 SV=1	FALSE	TRUE	41.966	15	23	15	529	56.5	High	High	High	High	High	High		0.865	1.035	0.614	0.838	0.211795	25.2738	508.8	440	416.1	430.6	634.9	389.8	11	11	11	11	11	11	65.57
High	A0A024R4A0	Nucleolin, isoform CRA_b OS=Homo sapiens OX=9606 GN=NCL PE=4 SV=1	FALSE	TRUE	17.4648	15	16	15	710	76.6	High	High	High	High	High	High		0.915	0.983	0.621	0.839667	0.192399	22.9137	273.1	249.8	292.5	287.5	352.4	219	10	10	10	10	10	10	36.81
High	H0Y2W2	ATPase family AAA domain-containing protein 3A (Fragment) OS=Homo sapiens OX=9606 GN=ATAD3A PE=1 SV=1	FALSE	TRUE	26.5734	15	17	1	572	64.3	High	High	High	High	High	High		0.937	0.972	0.622	0.843667	0.192765	22.8485	501.8	470.4	399.7	388.3	630.4	392.2	12	12	12	12	12	12	39.67
High	B2RBM8	cDNA, FLJ95596, highly similar to Homo sapiens activity-dependent neuroprotector (ADNP), mRNA OS=Homo sapiens OX=9606 PE=2 SV=1	FALSE	TRUE	15.245	15	17	15	1102	123.5	High	High	High	High	High	High		0.737	1.225	0.576	0.846	0.337951	39.9469	208.6	153.6	160.4	196.4	262	151	7	7	7	7	7	7	42.76
High	O43143	Pre-mRNA-splicing factor ATP-dependent RNA helicase DHX15 OS=Homo sapiens OX=9606 GN=DHX15 PE=1 SV=2	FALSE	TRUE	19.7484	15	16	14	795	90.9	High	High	High	High	High	High		0.813	0.94	0.799	0.850667	0.077681	9.13178	458.8	373.2	468.5	440.6	605.9	484.4	13	13	13	13	13	13	37.37
High	B2RAI2	cDNA, FLJ94931, highly similar to Homo sapiens zinc finger protein 148 (pHZ-52) (ZNF148), mRNA OS=Homo sapiens OX=9606 PE=2 SV=1	FALSE	TRUE	25.063	15	18	15	794	88.9	High	High	High	High	High	High		0.857	1.396	0.627	0.96	0.394711	41.1158	304.8	261.3	233.2	325.6	408	255.8	10	10	10	10	10	10	51.26
High	A0A2U3TZH3	Elongation factor 1-alpha OS=Homo sapiens OX=9606 GN=EEF1A2 PE=1 SV=1	FALSE	TRUE	29.2339	15	42	5	496	54.3	High	High	High	High	High	High		1.022	1.134	0.86	1.00533	0.137758	13.7027	116.2	118.7	103.2	117.1	134.2	115.4	4	4	4	4	4	4	84.24
High	E9PL17	Polyribonucleotide 5'-hydroxyl-kinase Clp1 OS=Homo sapiens OX=9606 GN=CLP1 PE=1 SV=1	FALSE	TRUE	38.5321	15	28	15	436	48.9	High	High	High	High	High	High		0.957	1.584	0.684	1.075	0.461457	42.9263	506.3	484.5	379.1	600.6	696	475.9	12	12	12	12	12	12	76.8
High	Q04695	Keratin, type I cytoskeletal 17 OS=Homo sapiens GN=KRT17 PE=1 SV=2	TRUE	TRUE	33.7963	15	31	6	432	48.1	High	High	High	High	High	High		0.611	0.8	3.546	1.65233	1.64268	99.416	42.8	26.1	68.6	54.9	30.6	108.5	4	4	4	4	3	4	76.49
High	A0A1W2PNU4	RANBP2-like and GRIP domain-containing protein 2 OS=Homo sapiens OX=9606 GN=RGPD2 PE=4 SV=1	FALSE	TRUE	8.54214	14	16	1	1756	197.1	High	High	High	High	High	High		0.458	1.23	0.456	0.714667	0.446293	62.4477	21.6	9.9	12.8	15.7	26.3	12	1	1	1	1	1	1	44.79
High	Q5HYM3	Oxysterol-binding protein OS=Homo sapiens OX=9606 GN=DKFZp686C0249 PE=2 SV=1	FALSE	TRUE	20.8989	14	16	14	890	101.2	High	High	High	High	High	High		0.781	0.917	0.562	0.753333	0.17911	23.7756	267.9	209.4	210	192.5	312.3	175.6	11	11	11	11	11	11	42.53
High	Q5H9N4	Uncharacterized protein DKFZp686L20222 OS=Homo sapiens OX=9606 GN=DKFZp686L20222 PE=3 SV=1	FALSE	TRUE	55.4455	14	19	11	303	34.8	High	High	High	High	High	High		0.863	0.948	0.522	0.777667	0.225456	28.9913	217	187.1	190.7	180.8	298.8	156	9	9	9	9	9	9	51.25
High	P55060	Exportin-2 OS=Homo sapiens OX=9606 GN=CSE1L PE=1 SV=3	FALSE	TRUE	15.757	14	15	14	971	110.3	High	High	High	High	High	High		0.929	0.938	0.488	0.785	0.257249	32.7706	220.1	204.4	187.9	176.2	291.2	142.1	9	9	9	9	9	9	38.79
High	Q00403	Transcription initiation factor IIB OS=Homo sapiens OX=9606 GN=GTF2B PE=1 SV=1	FALSE	TRUE	40.5063	14	20	14	316	34.8	High	High	High	High	High	High		0.73	1.173	0.485	0.796	0.348716	43.8086	396	289.1	276	323.9	525.6	255.1	10	10	10	10	10	10	45.78
High	Q9BTA9	WW domain-containing adapter protein with coiled-coil OS=Homo sapiens OX=9606 GN=WAC PE=1 SV=3	FALSE	TRUE	34.3122	14	15	14	647	70.7	High	High	High	High	High	High		0.759	1.118	0.512	0.796333	0.30472	38.2654	422	320.2	314.7	351.9	540.4	276.7	10	10	10	10	10	10	43.03
High	A8K984	Structural maintenance of chromosomes protein OS=Homo sapiens OX=9606 PE=2 SV=1	FALSE	TRUE	11.3617	14	15	14	1197	135.5	High	High	High	High	High	High		0.847	0.948	0.632	0.809	0.161391	19.9494	330.4	279.9	285.8	270.9	396.8	250.9	11	11	11	11	11	11	32
High	E5KNY5	Leucine-rich PPR-motif containing OS=Homo sapiens OX=9606 GN=LRPPRC PE=4 SV=1	FALSE	TRUE	10.5452	14	14	14	1394	157.8	High	High	High	High	High	High		0.878	0.95	0.611	0.813	0.178603	21.9684	200	175.7	179.8	170.8	261.7	159.9	10	10	10	10	10	10	30.48
High	P13639	Elongation factor 2 OS=Homo sapiens OX=9606 GN=EEF2 PE=1 SV=4	FALSE	TRUE	18.2984	14	18	14	858	95.3	High	High	High	High	High	High		0.893	0.844	0.729	0.822	0.0841843	10.2414	417.4	372.9	477.6	403.3	582.4	424.3	11	11	11	11	11	11	52.27
High	O94905	Erlin-2 OS=Homo sapiens OX=9606 GN=ERLIN2 PE=1 SV=1	FALSE	TRUE	41.5929	14	17	11	339	37.8	High	High	High	High	High	High		0.842	1.04	0.586	0.822667	0.227617	27.6681	364.3	306.8	286	297.4	452.6	265.3	14	14	14	14	14	14	50.3
High	P46087	Probable 28S rRNA (cytosine(4447)-C(5))-methyltransferase OS=Homo sapiens OX=9606 GN=NOP2 PE=1 SV=2	FALSE	TRUE	19.9507	14	19	12	812	89.2	High	High	High	High	High	High		0.825	1.032	0.613	0.823333	0.209505	25.4459	577.3	476.4	466.7	481.5	735.2	450.7	13	13	13	13	13	13	43.45
High	P60709	Actin, cytoplasmic 1 OS=Homo sapiens OX=9606 GN=ACTB PE=1 SV=1	TRUE	TRUE	44	14	23	6	375	41.7	High	High	High	High	High	High		0.932	0.646	0.897	0.825	0.156003	18.9095	435.3	405.8	592.1	382.4	533.7	478.7	13	13	13	13	13	13	78.09
High	P62424	60S ribosomal protein L7a OS=Homo sapiens OX=9606 GN=RPL7A PE=1 SV=2	FALSE	TRUE	37.594	14	24	14	266	30	High	High	High	High	High	High		0.862	0.976	0.658	0.832	0.161109	19.364	773.3	666.4	677.5	661.1	932.7	614.1	9	9	9	9	9	9	67
High	O94874	E3 UFM1-protein ligase 1 OS=Homo sapiens OX=9606 GN=UFL1 PE=1 SV=2	FALSE	TRUE	18.262	14	14	14	794	89.5	High	High	High	High	High	High		0.848	1.03	0.62	0.832667	0.20543	24.6713	231.6	196.4	170.8	175.9	269	166.9	8	8	8	8	8	8	30.71
High	A0A024RA49	Anillin, actin binding protein (Scraps homolog, Drosophila), isoform CRA_e OS=Homo sapiens OX=9606 GN=ANLN PE=4 SV=1	FALSE	TRUE	13.1673	14	14	14	1124	124.1	High	High	High	High	High	High		0.79	1.136	0.593	0.839667	0.274886	32.7375	250	197.5	198	224.9	323.6	191.8	7	7	7	7	7	7	28.73
High	Q13428	Treacle protein OS=Homo sapiens OX=9606 GN=TCOF1 PE=1 SV=3	FALSE	TRUE	10.4167	14	14	14	1488	152	High	High	High	High	High	High		0.814	1.161	0.546	0.840333	0.308345	36.6931	149.9	122	119.4	138.7	188.4	102.8	8	8	8	8	8	8	32.59
High	Q9BVP2	Guanine nucleotide-binding protein-like 3 OS=Homo sapiens OX=9606 GN=GNL3 PE=1 SV=2	FALSE	TRUE	29.1439	14	17	14	549	62	High	High	High	High	High	High		0.873	1.061	0.613	0.849	0.224962	26.4973	316.3	276	255.9	271.4	404.8	248	9	9	9	9	9	9	48.09
High	Q9NVH2	Integrator complex subunit 7 OS=Homo sapiens OX=9606 GN=INTS7 PE=1 SV=1	FALSE	TRUE	19.1268	14	14	14	962	106.8	High	High	High	High	High	High		0.84	1.17	0.582	0.864	0.294734	34.1127	119.1	100	104.2	121.9	179	104.2	6	6	6	6	6	6	31.78
High	Q8TDD1	ATP-dependent RNA helicase DDX54 OS=Homo sapiens OX=9606 GN=DDX54 PE=1 SV=2	FALSE	TRUE	20.2043	14	15	14	881	98.5	High	High	High	High	High	High		0.912	1.029	0.66	0.867	0.188571	21.7498	113.8	103.8	102.8	105.7	159.4	105.2	6	6	6	6	6	6	42.67
High	P30414	NK-tumor recognition protein OS=Homo sapiens OX=9606 GN=NKTR PE=1 SV=2	FALSE	TRUE	12.1067	14	14	14	1462	165.6	High	High	High	High	High	High		0.858	1.178	0.57	0.868667	0.30414	35.0123	284.7	244.2	223.7	263.4	393.7	224.5	11	11	11	11	11	11	35.58
High	P29084	Transcription initiation factor IIE subunit beta OS=Homo sapiens OX=9606 GN=GTF2E2 PE=1 SV=1	FALSE	TRUE	52.921	14	22	14	291	33	High	High	High	High	High	High		0.782	1.329	0.504	0.871667	0.419746	48.1544	581.2	454.4	407	541.1	804.5	405.8	12	12	12	12	12	12	59.96
High	V9HW37	Epididymis secretory protein Li 69 OS=Homo sapiens OX=9606 GN=HEL-S-69 PE=1 SV=1	FALSE	TRUE	25.3235	14	14	14	541	59.6	High	High	High	High	High	High		0.964	0.872	0.789	0.875	0.0875386	10.0044	247.8	238.8	272.2	237.3	316.2	249.5	9	9	9	9	9	9	33.34
High	J9R021	Eukaryotic translation initiation factor 3 subunit A OS=Homo sapiens OX=9606 GN=eIF3a PE=2 SV=1	FALSE	TRUE	10.5644	14	15	14	1382	166.4	High	High	High	High	High	High		0.904	0.994	0.773	0.890333	0.111132	12.4821	253	228.8	233	231.6	302.7	234	8	8	8	8	8	8	36.12
High	Q13177	Serine/threonine-protein kinase PAK 2 OS=Homo sapiens OX=9606 GN=PAK2 PE=1 SV=3	FALSE	TRUE	33.7786	14	16	14	524	58	High	High	High	High	High	High		0.859	1.258	0.593	0.903333	0.334709	37.0527	389.6	334.6	302.6	380.5	553	327.7	13	13	13	13	13	13	47.06
High	P11387	DNA topoisomerase 1 OS=Homo sapiens OX=9606 GN=TOP1 PE=1 SV=2	FALSE	TRUE	18.5621	14	18	14	765	90.7	High	High	High	High	High	High		0.978	0.99	0.747	0.905	0.136963	15.1341	401.2	392.3	403.8	399.9	548.9	410.1	11	11	11	11	11	11	46.1
High	A0A024R534	Metastasis associated 1 family, member 2, isoform CRA_a OS=Homo sapiens OX=9606 GN=MTA2 PE=4 SV=1	FALSE	TRUE	19.1617	14	14	10	668	75	High	High	High	High	High	High		0.851	1.261	0.614	0.908667	0.327332	36.0233	220.9	188	169.7	214	275.9	169.5	9	9	9	9	9	9	31.1
High	A0A024RDL1	Chaperonin containing TCP1, subunit 6A (Zeta 1), isoform CRA_a OS=Homo sapiens OX=9606 GN=CCT6A PE=3 SV=1	FALSE	TRUE	29.7552	14	21	10	531	58	High	High	High	High	High	High		0.914	0.989	0.825	0.909333	0.0820995	9.02854	507.9	464.1	481.3	475.8	599.6	494.5	13	13	13	13	13	13	52.45
High	Q06210	Glutamine--fructose-6-phosphate aminotransferase [isomerizing] 1 OS=Homo sapiens OX=9606 GN=GFPT1 PE=1 SV=3	FALSE	TRUE	25.3219	14	17	14	699	78.8	High	High	High	High	High	High		0.994	1.055	0.713	0.920667	0.182413	19.8131	406.2	403.8	366.7	386.7	513.6	366	11	11	11	11	11	11	46.77
High	B7Z5U5	cDNA FLJ61655, highly similar to Phosphorylated CTD-interacting factor 1 OS=Homo sapiens OX=9606 PE=2 SV=1	FALSE	TRUE	21.6901	14	15	14	710	81.3	High	High	High	High	High	High		0.855	1.364	0.599	0.939333	0.38941	41.456	291.2	248.9	217.2	296.2	405.1	242.5	9	9	9	9	9	9	38.54
High	Q03164	Histone-lysine N-methyltransferase 2A OS=Homo sapiens OX=9606 GN=KMT2A PE=1 SV=5	FALSE	TRUE	4.45956	14	15	14	3969	431.5	High	High	High	High	High	High		0.87	1.438	0.611	0.973	0.423012	43.475	104.1	90.5	72.9	104.9	130	79.4	6	6	6	6	6	6	33.37
High	Q5T9A4	ATPase family AAA domain-containing protein 3B OS=Homo sapiens OX=9606 GN=ATAD3B PE=1 SV=1	FALSE	TRUE	20.9877	14	15	3	648	72.5	High	High	High	High	High	High		0.797	1.44	0.791	1.00933	0.37298	36.9531	36.2	28.9	24.2	34.8	40.7	32.2	2	2	2	2	2	2	31.58
High	A8K6U2	cDNA FLJ78675, highly similar to Homo sapiens stroma HMG-box containing protein (HBP2) mRNA OS=Homo sapiens OX=9606 PE=2 SV=1	FALSE	TRUE	17.4283	14	18	14	941	105.1	High	High	High	High	High	High		0.89	1.479	0.682	1.017	0.413399	40.6489	467.8	416.3	353.7	523	585.5	399.4	14	14	14	14	14	14	35.58
High	Q06830	Peroxiredoxin-1 OS=Homo sapiens OX=9606 GN=PRDX1 PE=1 SV=1	TRUE	TRUE	75.8794	14	19	13	199	22.1	High	High	High	High	High	High		0.995	1.065	1.957	1.339	0.536347	40.0558	514.3	511.8	625.4	666.3	693	1356.5	13	13	13	13	13	13	39.88
High	P50446	Keratin, type II cytoskeletal 6A OS=Mus musculus GN=Krt6a PE=2 SV=3	TRUE	TRUE	20.0723	14	45	0	553	59.3	Not Found	Not Found	Not Found	Not Found	Not Found	Not Found					#DIV/0!	#DIV/0!	#DIV/0!													102.94
High	Q96T67	TOB3 OS=Homo sapiens OX=9606 PE=2 SV=1	FALSE	TRUE	25.2595	14	15	1	578	65.1	Medium	Medium	Medium	Medium	Medium	Medium					#DIV/0!	#DIV/0!	#DIV/0!													32.89
High	A0A024R9W5	HECT, UBA and WWE domain containing 1, isoform CRA_b OS=Homo sapiens OX=9606 GN=HUWE1 PE=4 SV=1	FALSE	TRUE	3.38363	13	14	13	4374	481.6	High	High	High	High	High	High		0.802	1.038	0.439	0.759667	0.301736	39.7195	27.3	21.8	22.8	23.7	39.4	17.3	1	1	1	1	1	1	32.86
High	A0A024RBE8	Solute carrier family 25 (Mitochondrial carrier phosphate carrier), member 3, isoform CRA_a OS=Homo sapiens OX=9606 GN=SLC25A3 PE=2 SV=1	FALSE	TRUE	35.4571	13	23	13	361	39.9	High	High	High	High	High	High		0.845	0.982	0.495	0.774	0.251143	32.4475	916.2	774.6	745.2	731.4	1250.1	618.4	11	11	11	11	11	11	54.11
High	A8K787	cDNA FLJ75273, highly similar to Homo sapiens solute carrier family 25 (mitochondrial carrier; adenine nucleotide translocator), member 4, mRNA OS=Homo sapiens OX=9606 PE=2 SV=1	FALSE	TRUE	39.9329	13	24	3	298	33.1	High	High	High	High	High	High		1.007	0.815	0.531	0.784333	0.239477	30.5326	37.1	37.4	40.9	33.3	60.5	32.1	2	2	2	2	2	2	60.79
High	P42224	Signal transducer and activator of transcription 1-alpha/beta OS=Homo sapiens OX=9606 GN=STAT1 PE=1 SV=2	FALSE	TRUE	18.9333	13	16	13	750	87.3	High	High	High	High	High	High		0.811	0.983	0.56	0.784667	0.212726	27.1104	201.3	163.2	151.9	149.3	235	131.5	6	6	6	6	6	6	37.65
High	A0A024R8B6	Nucleoporin 214kDa, isoform CRA_b OS=Homo sapiens OX=9606 GN=NUP214 PE=4 SV=1	FALSE	TRUE	7.8367	13	14	13	2131	218	High	High	High	High	High	High		0.724	1.067	0.564	0.785	0.256988	32.7374	223.6	161.9	178.9	190.9	323.9	182.8	8	8	8	8	8	8	32.26
High	B2R6J2	cDNA, FLJ92973, highly similar to Homo sapiens villin 2 (ezrin) (VIL2), mRNA OS=Homo sapiens OX=9606 PE=2 SV=1	FALSE	TRUE	20.6485	13	15	10	586	69.4	High	High	High	High	High	High		0.824	0.92	0.633	0.792333	0.146097	18.4388	313.6	258.5	293.4	269.9	405.4	256.5	8	8	8	8	8	8	33.49
High	Q9BUF5	Tubulin beta-6 chain OS=Homo sapiens OX=9606 GN=TUBB6 PE=1 SV=1	FALSE	TRUE	36.9955	13	27	6	446	49.8	High	High	High	High	High	High		0.856	0.969	0.558	0.794333	0.212326	26.7301	127.2	108.8	105.8	102.5	172.3	96.2	3	3	3	3	3	3	67.56
High	Q9Y4L1	Hypoxia up-regulated protein 1 OS=Homo sapiens OX=9606 GN=HYOU1 PE=1 SV=1	FALSE	TRUE	14.2142	13	15	13	999	111.3	High	High	High	High	High	High		0.866	1.012	0.569	0.815667	0.225748	27.6765	211	182.8	167.4	169.5	278.7	158.6	9	9	9	9	9	9	35.44
High	A8K9B9	cDNA FLJ77391, highly similar to Homo sapiens EH-domain containing 4 (EHD4), mRNA OS=Homo sapiens OX=9606 PE=2 SV=1	FALSE	TRUE	26.6174	13	13	12	541	61.1	High	High	High	High	High	High		0.899	1.03	0.526	0.818333	0.261504	31.9557	208	187	171.3	176.4	304.7	160.4	7	7	7	7	7	7	31.07
High	Q16891	MICOS complex subunit MIC60 OS=Homo sapiens OX=9606 GN=IMMT PE=1 SV=1	FALSE	TRUE	17.5462	13	15	13	758	83.6	High	High	High	High	High	High		0.826	1.034	0.638	0.832667	0.198084	23.7891	227.3	187.6	172.8	178.7	274.9	175.3	8	8	8	8	8	8	34.31
High	Q6PUJ7	Epididymis luminal protein 215 OS=Homo sapiens OX=9606 GN=HEL-215 PE=2 SV=1	FALSE	TRUE	58.4559	13	23	1	272	29.8	High	High	High	High	High	High		0.899	0.914	0.699	0.837333	0.120035	14.3354	481.4	432.6	427.7	390.8	612.6	428	10	10	10	10	10	10	68.21
High	Q2KHR3	Glutamine and serine-rich protein 1 OS=Homo sapiens OX=9606 GN=QSER1 PE=1 SV=3	FALSE	TRUE	9.27954	13	15	13	1735	189.9	High	High	High	High	High	High		0.769	1.191	0.585	0.848333	0.310692	36.6238	257.6	198	192.7	229.5	349.3	204.2	10	10	10	10	10	10	37.19
High	F4ZW66	NF110b OS=Homo sapiens OX=9606 PE=2 SV=1	FALSE	TRUE	15.7016	13	15	13	898	95.7	High	High	High	High	High	High		0.822	0.922	0.805	0.849667	0.0632166	7.44016	244.1	200.7	236	217.6	329.7	265.4	9	9	9	9	9	9	31.34
High	A0A1Y0BRN3	Myosin VI transcript variant 007 OS=Homo sapiens OX=9606 GN=Myo6-007 PE=2 SV=1	FALSE	TRUE	12.3735	13	15	13	1285	148.5	High	High	High	High	High	High		0.805	1.165	0.591	0.853667	0.290078	33.9803	140.9	113.4	112.2	130.7	194.9	115.1	7	7	7	7	7	7	36.7
High	Q9HBB3	60S ribosomal protein L6 OS=Homo sapiens OX=9606 PE=2 SV=1	FALSE	TRUE	43.9446	13	21	13	289	32.9	High	High	High	High	High	High		0.92	0.963	0.697	0.86	0.14279	16.6035	977.9	899.7	884.2	851.2	1214.5	846.1	11	11	11	11	11	11	51.75
High	Q15366	Poly(rC)-binding protein 2 OS=Homo sapiens OX=9606 GN=PCBP2 PE=1 SV=1	FALSE	TRUE	40.8219	13	17	6	365	38.6	High	High	High	High	High	High		0.913	1.075	0.613	0.867	0.23441	27.0369	231.6	211.5	195.4	210	312.4	191.6	8	8	8	8	8	8	43.98
High	Q9Y5B9	FACT complex subunit SPT16 OS=Homo sapiens OX=9606 GN=SUPT16H PE=1 SV=1	FALSE	TRUE	13.1805	13	14	13	1047	119.8	High	High	High	High	High	High		0.912	0.905	0.785	0.867333	0.0713886	8.23082	85.6	78	81.5	73.8	98.5	77.3	5	5	5	5	5	5	33.22
High	O94832	Unconventional myosin-Id OS=Homo sapiens OX=9606 GN=MYO1D PE=1 SV=2	FALSE	TRUE	15.0099	13	14	13	1006	116.1	High	High	High	High	High	High		0.813	1.172	0.631	0.872	0.275283	31.5692	149.5	121.6	117.2	137.4	184.2	116.2	7	7	7	7	7	7	39.9
High	Q15365	Poly(rC)-binding protein 1 OS=Homo sapiens OX=9606 GN=PCBP1 PE=1 SV=2	FALSE	TRUE	48.3146	13	18	7	356	37.5	High	High	High	High	High	High		0.828	1.175	0.619	0.874	0.28084	32.1327	264.2	218.7	208.8	245.3	327.5	202.6	6	6	6	6	6	6	50.12
High	B3KWV6	Cytoplasmic FMR1-interacting protein OS=Homo sapiens OX=9606 PE=2 SV=1	FALSE	TRUE	12.1116	13	16	13	1255	145.4	High	High	High	High	High	High		0.914	1.075	0.635	0.874667	0.222622	25.4522	305.9	279.7	247.9	266.6	389.1	247.2	8	8	8	8	8	8	40.42
High	P52948	Nuclear pore complex protein Nup98-Nup96 OS=Homo sapiens OX=9606 GN=NUP98 PE=1 SV=4	FALSE	TRUE	9.6863	13	14	10	1817	197.5	High	High	High	High	High	High		0.877	1.107	0.645	0.876333	0.231001	26.3599	171.4	150.3	147.2	162.9	236.6	152.5	5	5	5	5	5	5	26.3
High	Q99959	Plakophilin-2 OS=Homo sapiens OX=9606 GN=PKP2 PE=1 SV=2	FALSE	TRUE	16.5721	13	16	12	881	97.4	High	High	High	High	High	High		0.857	1.172	0.603	0.877333	0.285044	32.4899	208.7	179	161.7	189.5	268.2	161.7	8	8	8	8	8	8	41.41
High	Q59EL4	PRPF4 protein variant (Fragment) OS=Homo sapiens OX=9606 PE=2 SV=1	FALSE	TRUE	26.4432	13	14	1	537	60	High	High	High	High	High	High		0.98	1.006	0.682	0.889333	0.180026	20.2428	218.2	213.8	188.4	189.6	258.8	176.5	8	8	8	8	8	8	38.63
High	Q59H77	T-complex protein 1 subunit gamma (Fragment) OS=Homo sapiens OX=9606 PE=2 SV=1	FALSE	TRUE	25.6499	13	15	13	577	63.5	High	High	High	High	High	High		0.95	0.955	0.771	0.892	0.104819	11.751	203.7	193.6	192.7	184.1	255.3	196.8	8	8	8	8	8	8	41.75
High	Q96S55	ATPase WRNIP1 OS=Homo sapiens OX=9606 GN=WRNIP1 PE=1 SV=2	FALSE	TRUE	21.8045	13	16	13	665	72.1	High	High	High	High	High	High		0.839	1.295	0.545	0.893	0.377905	42.3186	435.7	365.3	318.5	412.5	593.4	323.4	12	12	12	12	12	12	32.32
High	A0A2R8Y891	ATP-dependent 6-phosphofructokinase OS=Homo sapiens OX=9606 GN=PFKM PE=1 SV=1	FALSE	TRUE	16.8743	13	14	11	883	96.8	High	High	High	High	High	High		0.947	1.162	0.601	0.903333	0.283038	31.3326	238.7	226	221.2	257	384.7	231.1	6	6	6	6	6	6	40.09
High	Q96CB8	Integrator complex subunit 12 OS=Homo sapiens OX=9606 GN=INTS12 PE=1 SV=1	FALSE	TRUE	36.1472	13	23	13	462	48.8	High	High	High	High	High	High		0.842	1.298	0.644	0.928	0.335374	36.1395	782.8	659.5	611.1	793	1028	662	11	11	11	11	11	11	53.65
High	Q9UBD5	Origin recognition complex subunit 3 OS=Homo sapiens OX=9606 GN=ORC3 PE=1 SV=1	FALSE	TRUE	18.5654	13	13	13	711	82.2	High	High	High	High	High	High		0.844	1.393	0.554	0.930333	0.426111	45.8019	252.2	212.9	194.1	270.4	332.9	184.4	10	10	10	10	10	10	30.94
High	A2A3R6	40S ribosomal protein S6 OS=Homo sapiens OX=9606 GN=RPS6 PE=2 SV=1	FALSE	TRUE	38.9558	13	19	13	249	28.7	High	High	High	High	High	High		0.942	1.067	0.803	0.937333	0.132062	14.0891	378.4	356.4	362.3	386.5	466.1	374.2	11	11	11	11	11	11	48.03
High	A0A2R8Y6W8	General transcription and DNA repair factor IIH helicase subunit XPB OS=Homo sapiens OX=9606 GN=ERCC3 PE=1 SV=1	FALSE	TRUE	17.1004	13	15	13	807	91.9	High	High	High	High	High	High		0.857	1.264	0.699	0.94	0.291501	31.0108	265.8	227.9	192.1	242.8	303.4	212.2	12	12	12	12	12	12	34.8
High	Q9HCC0	Methylcrotonoyl-CoA carboxylase beta chain, mitochondrial OS=Homo sapiens OX=9606 GN=MCCC2 PE=1 SV=1	FALSE	TRUE	26.9982	13	16	13	563	61.3	High	High	High	High	High	High		0.982	1.09	0.856	0.976	0.117115	11.9995	290.4	285.1	182.6	199	304.9	261	9	9	9	9	9	9	44.6
High	B2R7V4	cDNA, FLJ93619, highly similar to Homo sapiens PRP4 pre-mRNA processing factor 4 homolog (yeast) (PRPF4), mRNA OS=Homo sapiens OX=9606 PE=2 SV=1	FALSE	TRUE	27.3946	13	14	1	522	58.4	High	High	High	High	High	High		0.896	1.445	0.636	0.992333	0.413014	41.6205	13.6	12.1	6.7	9.7	14	8.9	1	1	1	1	1	1	39.08
High	A0A0A0MT49	Transcription activator BRG1 OS=Homo sapiens OX=9606 GN=SMARCA4 PE=1 SV=1	FALSE	TRUE	8.03093	13	14	13	1681	188.7	High	High	High	High	High	High		0.846	1.325	0.858	1.00967	0.273153	27.0537	139.8	118.2	112.3	148.8	225.2	193.2	7	6	7	7	7	7	34.25
High	P22695	Cytochrome b-c1 complex subunit 2, mitochondrial OS=Homo sapiens OX=9606 GN=UQCRC2 PE=1 SV=3	FALSE	TRUE	33.7748	13	16	13	453	48.4	High	High	High	High	High	High		1.01	1.159	0.87	1.013	0.144523	14.2669	247.7	250.2	234.8	272.2	315.5	274.6	10	10	10	10	10	10	46.37
High	A0A024R814	Ribosomal protein L7, isoform CRA_a OS=Homo sapiens OX=9606 GN=RPL7 PE=4 SV=1	FALSE	TRUE	36.2934	13	24	13	259	30.4	High	High	High	High	High	High		1.447	1.889	1.601	1.64567	0.22436	13.6334	715.2	1034.9	679.5	1283.3	845.6	1353.4	11	11	11	11	11	11	47.01
High	A8K401	Prohibitin, isoform CRA_a OS=Homo sapiens OX=9606 GN=PHB PE=2 SV=1	FALSE	TRUE	61.0294	13	23	1	272	29.8	High	High	High	High	High	Not Found					#DIV/0!	#DIV/0!	#DIV/0!													67.93
High	E7EWN3	SET domain-containing protein 5 OS=Homo sapiens OX=9606 GN=SETD5 PE=1 SV=1	FALSE	TRUE	9.65092	12	17	10	1461	159.3	High	High	High	High	High	High		0.683	0.972	0.482	0.712333	0.246313	34.5784	159.6	109	129.9	126.2	217.4	104.7	5	5	5	5	5	5	38.95
High	P11388	DNA topoisomerase 2-alpha OS=Homo sapiens OX=9606 GN=TOP2A PE=1 SV=3	FALSE	TRUE	7.70738	12	14	6	1531	174.3	High	High	High	High	High	High		0.77	0.907	0.501	0.726	0.206545	28.4498	183.3	141.2	158.5	143.8	247	123.8	5	5	5	5	5	5	30.68
High	A0A024R8N2	Integrin beta OS=Homo sapiens OX=9606 GN=ITGB4 PE=3 SV=1	FALSE	TRUE	7.36	12	13	12	1875	207.7	High	High	High	High	High	High		0.789	0.859	0.537	0.728333	0.169356	23.2525	75.5	59.6	61.1	52.5	100.8	54.1	5	5	5	5	5	5	29.11
High	P17812	CTP synthase 1 OS=Homo sapiens OX=9606 GN=CTPS1 PE=1 SV=2	FALSE	TRUE	21.489	12	13	12	591	66.6	High	High	High	High	High	High		0.761	1.024	0.501	0.762	0.261501	34.3178	199.1	151.5	159.4	163.2	269	134.7	7	7	7	7	7	7	24.9
High	E9PEB5	Far upstream element-binding protein 1 OS=Homo sapiens OX=9606 GN=FUBP1 PE=1 SV=1	FALSE	TRUE	18.0153	12	12	8	655	68.9	High	High	High	High	High	High		0.73	1.039	0.543	0.770667	0.250488	32.5028	122.3	89.3	96.5	100.3	157.5	85.6	5	5	5	5	5	5	27.77
High	A0A024RAS3	HCG27698, isoform CRA_a OS=Homo sapiens OX=9606 GN=hCG_27698 PE=3 SV=1	FALSE	TRUE	29.8901	12	14	12	455	50.6	High	High	High	High	High	High		0.709	1.029	0.608	0.782	0.219789	28.106	364.8	258.6	257	264.6	405.1	246.3	9	9	9	9	9	9	35.83
High	A0A024R5Z0	Transcription factor 12 (HTF4, helix-loop-helix transcription factors 4), isoform CRA_b OS=Homo sapiens OX=9606 GN=TCF12 PE=4 SV=1	FALSE	TRUE	27.1955	12	16	11	706	75.8	High	High	High	High	High	High		0.692	1.128	0.559	0.793	0.297642	37.5337	286.2	198	216.2	243.9	373.9	209.1	8	8	8	8	8	8	43.96
High	Q5SRE5	Nucleoporin NUP188 homolog OS=Homo sapiens OX=9606 GN=NUP188 PE=1 SV=1	FALSE	TRUE	7.7187	12	12	12	1749	195.9	High	High	High	High	High	High		0.88	0.96	0.553	0.797667	0.21563	27.0326	327.5	288.1	271	260.1	431.7	238.9	8	8	8	8	8	8	29.52
High	A8K973	cDNA FLJ77998, highly similar to Homo sapiens synaptotagmin-like 4 (granuphilin-a), mRNA OS=Homo sapiens OX=9606 PE=2 SV=1	FALSE	TRUE	18.7779	12	12	12	671	75.9	High	High	High	High	High	High		0.758	1.171	0.468	0.799	0.353289	44.2164	266.6	202	204.2	239	395.3	184.9	7	7	7	7	7	7	27.37
High	P54577	Tyrosine--tRNA ligase, cytoplasmic OS=Homo sapiens OX=9606 GN=YARS PE=1 SV=4	FALSE	TRUE	25.5682	12	13	12	528	59.1	High	High	High	High	High	High		0.841	1.023	0.547	0.803667	0.240186	29.8863	164.2	138.1	124.6	127.5	219.4	120.1	5	5	5	5	5	5	29.57
High	A0A024R3R5	Lamin B receptor, isoform CRA_a OS=Homo sapiens OX=9606 GN=LBR PE=4 SV=1	FALSE	TRUE	18.2114	12	16	12	615	70.7	High	High	High	High	High	High		0.874	1.027	0.532	0.811	0.253442	31.2506	419.4	366.3	355.1	364.7	600.6	319.7	7	7	7	7	7	7	32.43
High	Q8IX12	Cell division cycle and apoptosis regulator protein 1 OS=Homo sapiens OX=9606 GN=CCAR1 PE=1 SV=2	FALSE	TRUE	10.1739	12	13	12	1150	132.7	High	High	High	High	High	High		0.757	1.114	0.579	0.816667	0.272445	33.3606	118.5	89.7	94.1	104.9	163.1	94.4	6	6	6	6	6	6	32.18
High	O95433	Activator of 90 kDa heat shock protein ATPase homolog 1 OS=Homo sapiens OX=9606 GN=AHSA1 PE=1 SV=1	FALSE	TRUE	41.1243	12	16	12	338	38.3	High	High	High	High	High	High		0.822	1.063	0.571	0.818667	0.246017	30.0509	344.1	282.8	279.9	297.5	457.9	261.5	11	11	11	11	11	11	38.73
High	Q69YJ7	Uncharacterized protein DKFZp667H197 (Fragment) OS=Homo sapiens OX=9606 GN=DKFZp667H197 PE=2 SV=1	FALSE	TRUE	14.0461	12	13	12	954	100.1	High	High	High	High	High	High		0.802	1.131	0.539	0.824	0.296613	35.9967	124.2	99.6	97.6	110.4	163.3	88.1	3	3	3	3	3	3	33.39
High	A0A090N7Y2	ATP-binding cassette, sub-family F (GCN20), member 2 OS=Homo sapiens OX=9606 GN=ABCF2 PE=4 SV=1	FALSE	TRUE	18.2965	12	12	12	634	72.4	High	High	High	High	High	High		0.88	1.034	0.561	0.825	0.241249	29.2423	272.9	240.1	222.8	230.5	365.2	204.7	9	9	9	9	9	9	29.63
High	A0MZ66	Shootin-1 OS=Homo sapiens OX=9606 GN=SHTN1 PE=1 SV=4	FALSE	TRUE	20.2853	12	12	12	631	71.6	High	High	High	High	High	High		0.882	1.059	0.555	0.832	0.255693	30.7324	242.4	213.8	200.4	212.2	326.8	181.5	8	8	8	8	8	8	34.15
High	P43490	Nicotinamide phosphoribosyltransferase OS=Homo sapiens OX=9606 GN=NAMPT PE=1 SV=1	FALSE	TRUE	32.7902	12	15	12	491	55.5	High	High	High	High	High	High		0.95	1.015	0.552	0.839	0.250665	29.8767	191.1	181.5	163.1	165.5	258.3	142.7	6	6	6	6	6	6	41.44
High	Q13470	Non-receptor tyrosine-protein kinase TNK1 OS=Homo sapiens OX=9606 GN=TNK1 PE=1 SV=3	FALSE	TRUE	21.3213	12	13	12	666	72.4	High	High	High	High	High	High		0.834	1.114	0.571	0.839667	0.271544	32.3395	360.3	300.5	286.4	319.1	477	272.5	10	10	10	10	10	10	36.13
High	Q59F66	DEAD box polypeptide 17 isoform p82 variant (Fragment) OS=Homo sapiens OX=9606 PE=2 SV=1	FALSE	TRUE	20.3528	12	12	8	737	81	High	High	High	High	High	High		0.881	1.029	0.625	0.845	0.204392	24.1884	97.2	85.6	86.1	88.6	140.8	88	6	6	6	6	6	6	28.59
High	P13010	X-ray repair cross-complementing protein 5 OS=Homo sapiens OX=9606 GN=XRCC5 PE=1 SV=3	FALSE	TRUE	18.4426	12	15	12	732	82.7	High	High	High	High	High	High		0.813	1.148	0.576	0.845667	0.287396	33.9845	239.7	194.9	198.1	227.3	318.5	183.5	9	9	9	9	9	9	43.73
High	A0A024R1K8	Splicing factor 3a, subunit 1, 120kDa, isoform CRA_a OS=Homo sapiens OX=9606 GN=SF3A1 PE=4 SV=1	FALSE	TRUE	17.4023	12	12	12	793	88.8	High	High	High	High	High	High		0.842	1.104	0.596	0.847333	0.254042	29.9814	138.9	116.9	113.1	124.9	188.1	112.1	7	7	7	7	7	7	34.48
High	H7BXI1	Extended synaptotagmin-2 (Fragment) OS=Homo sapiens OX=9606 GN=ESYT2 PE=1 SV=1	FALSE	TRUE	17.4208	12	15	12	884	97.9	High	High	High	High	High	High		0.756	1.17	0.62	0.848667	0.28647	33.7554	162.7	123	115.6	135.3	192	119.1	7	7	7	7	7	7	40.18
High	B4DZF2	cDNA FLJ59571, highly similar to Eukaryotic translation initiation factor 4gamma 2 OS=Homo sapiens OX=9606 PE=2 SV=1	FALSE	TRUE	12.7551	12	14	12	980	110.2	High	High	High	High	High	High		0.768	1.193	0.612	0.857667	0.3007	35.0602	213.9	164.3	164.3	196.1	265.2	162.3	6	6	6	6	6	6	33.19
High	A0A0J9YVP6	Poly(U)-binding-splicing factor PUF60 (Fragment) OS=Homo sapiens OX=9606 GN=PUF60 PE=1 SV=1	FALSE	TRUE	29.0262	12	12	12	534	57.4	High	High	High	High	High	High		1.038	0.987	0.558	0.861	0.263642	30.6204	121.5	126.1	129.3	127.6	177.5	99.1	6	6	6	6	6	6	29.13
High	A8K9T5	E3 ubiquitin-protein ligase OS=Homo sapiens OX=9606 PE=2 SV=1	FALSE	TRUE	11.2798	12	15	8	922	105.1	High	High	High	High	High	High		0.79	1.085	0.718	0.864333	0.194464	22.4988	163	128.7	122.3	132.7	198.2	142.4	5	5	5	5	5	5	30.64
High	Q9ULD2	Microtubule-associated tumor suppressor 1 OS=Homo sapiens OX=9606 GN=MTUS1 PE=1 SV=2	FALSE	TRUE	10.2362	12	14	12	1270	141.3	High	High	High	High	High	High		0.794	1.19	0.616	0.866667	0.293819	33.9021	178.2	141.6	130.2	155	204.7	126.1	7	7	7	7	7	7	30.19
High	A8K9A4	cDNA FLJ75154, highly similar to Homo sapiens heterogeneous nuclear ribonucleoprotein C (C1/C2), mRNA OS=Homo sapiens OX=9606 PE=2 SV=1	FALSE	TRUE	34.9673	12	19	12	306	33.6	High	High	High	High	High	High		0.872	1.095	0.636	0.867667	0.229531	26.4538	572.5	499.5	453	496.1	689.5	438.5	10	10	10	10	10	10	46.19
High	P27694	Replication protein A 70 kDa DNA-binding subunit OS=Homo sapiens OX=9606 GN=RPA1 PE=1 SV=2	FALSE	TRUE	22.5649	12	15	12	616	68.1	High	High	High	High	High	High		0.796	1.249	0.57	0.871667	0.345766	39.6673	304.2	242.2	230.8	288.2	396.5	226.2	7	7	7	7	7	7	33.05
High	Q5VTR2	E3 ubiquitin-protein ligase BRE1A OS=Homo sapiens OX=9606 GN=RNF20 PE=1 SV=2	FALSE	TRUE	13.0256	12	13	10	975	113.6	High	High	High	High	High	High		0.841	1.208	0.576	0.875	0.317369	36.2707	174.2	146.4	139	167.9	230.4	132.6	7	7	7	7	7	7	32.62
High	Q86YZ3	Hornerin OS=Homo sapiens OX=9606 GN=HRNR PE=1 SV=2	TRUE	TRUE	14.3509	12	15	12	2850	282.2	High	High	High	High	High	High		0.456	1.484	0.736	0.892	0.531458	59.5805	99.1	45.1	47	69.7	91.5	67.3	2	2	2	2	2	2	43.83
High	A8KAE0	cDNA FLJ78476, highly similar to Homo sapiens WD repeat and HMG-box DNA binding protein 1 (WDHD1), transcript variant 1, mRNA OS=Homo sapiens OX=9606 PE=2 SV=1	FALSE	TRUE	11.5146	12	12	12	1129	125.9	High	High	High	High	High	High		0.884	1.189	0.605	0.892667	0.292096	32.7218	160	141.4	130.3	154.9	205.5	124.4	8	8	8	8	8	8	34.32
High	A0A024R8B7	Cofactor required for Sp1 transcriptional activation, subunit 8, 34kDa, isoform CRA_b OS=Homo sapiens OX=9606 GN=CRSP8 PE=4 SV=1	FALSE	TRUE	44.6945	12	16	12	311	35.4	High	High	High	High	High	High		0.886	1.061	0.745	0.897333	0.158305	17.6417	292	258.6	214	227.1	351.9	262.3	11	11	11	11	11	11	47.24
High	P04792	Heat shock protein beta-1 OS=Homo sapiens OX=9606 GN=HSPB1 PE=1 SV=2	FALSE	TRUE	62.439	12	28	12	205	22.8	High	High	High	High	High	High		0.915	1.185	0.614	0.904667	0.28564	31.5741	595.3	544.5	474.7	562.7	793.3	487	10	10	10	10	10	10	68.61
High	Q7Z5K2	Wings apart-like protein homolog OS=Homo sapiens OX=9606 GN=WAPL PE=1 SV=1	FALSE	TRUE	10.9244	12	12	12	1190	132.9	High	High	High	High	High	High		0.964	1.142	0.609	0.905	0.271354	29.9839	97.5	94	100.6	114.9	160.5	97.8	4	4	4	4	4	4	23.97
High	O00267	Transcription elongation factor SPT5 OS=Homo sapiens OX=9606 GN=SUPT5H PE=1 SV=1	FALSE	TRUE	11.9595	12	12	12	1087	120.9	High	High	High	High	High	High		0.824	1.311	0.623	0.919333	0.353769	38.481	124.3	102.4	106.4	139.5	163.7	102	7	7	7	7	7	7	22.53
High	O14776	Transcription elongation regulator 1 OS=Homo sapiens OX=9606 GN=TCERG1 PE=1 SV=2	FALSE	TRUE	10.7468	12	12	12	1098	123.8	High	High	High	High	High	High		0.806	1.351	0.644	0.933667	0.370387	39.6701	138.4	111.5	90.4	122.1	151.1	97.3	8	8	8	8	8	8	27.84
High	A8K4Z6	cDNA FLJ76180 OS=Homo sapiens OX=9606 PE=2 SV=1	FALSE	TRUE	24.7173	12	13	12	619	70.5	High	High	High	High	High	High		1.098	1.111	0.596	0.935	0.293655	31.4069	199.8	219.4	176.2	195.8	242.7	144.7	8	8	8	8	8	8	34.06
High	B2R5Y4	cDNA, FLJ92684, highly similar to Homo sapiens IK cytokine, down-regulator of HLA II (IK), mRNA OS=Homo sapiens OX=9606 PE=2 SV=1	FALSE	TRUE	26.3914	12	16	12	557	65.6	High	High	High	High	High	High		1.076	1.388	0.682	1.04867	0.353793	33.7374	234	251.8	207.2	287.5	351.2	239.5	11	11	11	11	11	11	43.09
High	A0A1B0GTR1	Propionyl-CoA carboxylase alpha chain, mitochondrial (Fragment) OS=Homo sapiens OX=9606 GN=PCCA PE=1 SV=1	FALSE	TRUE	53.8776	12	70	1	245	26.3	High	High	High	High	High	High					#DIV/0!	#DIV/0!	#DIV/0!													217.79
High	M0R180	Symplekin (Fragment) OS=Homo sapiens OX=9606 GN=SYMPK PE=1 SV=1	FALSE	TRUE	69.3431	12	26	1	137	15.3	High	High	High	High	High	High					#DIV/0!	#DIV/0!	#DIV/0!													83.51
High	P22626	Heterogeneous nuclear ribonucleoproteins A2/B1 OS=Homo sapiens OX=9606 GN=HNRNPA2B1 PE=1 SV=2	FALSE	TRUE	34.5609	11	17	9	353	37.4	High	High	High	High	High	High		0.81	0.848	0.493	0.717	0.194918	27.1852	448.5	363.3	452	383.2	653.4	322.2	8	8	8	8	8	8	33.04
High	V9HWP2	Epididymis luminal protein 35 OS=Homo sapiens OX=9606 GN=HEL-S-125m PE=2 SV=1	FALSE	TRUE	14.3213	11	13	10	803	92.4	High	High	High	High	High	High		0.809	0.738	0.653	0.733333	0.0781046	10.6506	131.5	106.4	149.6	110.5	180.6	118	7	7	7	7	7	7	31.42
High	Q08J23	tRNA (cytosine(34)-C(5))-methyltransferase OS=Homo sapiens OX=9606 GN=NSUN2 PE=1 SV=2	FALSE	TRUE	20.4694	11	11	11	767	86.4	High	High	High	High	High	High		0.796	1.002	0.477	0.758333	0.264519	34.8816	262.6	209	215.6	216	342.5	163.5	7	7	7	7	7	7	31.49
High	D3DR65	SPFH domain family, member 1, isoform CRA_a OS=Homo sapiens OX=9606 GN=SPFH1 PE=4 SV=1	FALSE	TRUE	35.9195	11	16	8	348	39.1	High	High	High	High	High	High		0.797	0.928	0.552	0.759	0.190859	25.1461	264.7	210.9	199	184.6	324.1	178.9	7	7	7	7	7	7	47.32
High	Q5VV67	Peroxisome proliferator-activated receptor gamma coactivator-related protein 1 OS=Homo sapiens OX=9606 GN=PPRC1 PE=1 SV=1	FALSE	TRUE	7.8125	11	12	11	1664	177.4	High	High	High	High	High	High		0.717	1.025	0.547	0.763	0.242297	31.7559	217.5	156	167.2	171.4	263.3	144.1	7	7	7	7	7	7	24.5
High	A0A0G2JH68	Protein diaphanous homolog 1 OS=Homo sapiens OX=9606 GN=DIAPH1 PE=1 SV=1	FALSE	TRUE	8.41195	11	13	11	1272	141.3	High	High	High	High	High	High		0.808	0.943	0.555	0.768667	0.196968	25.6246	289.8	234.1	260.2	245.4	399.8	221.7	11	11	11	11	11	11	34.34
High	O00148	ATP-dependent RNA helicase DDX39A OS=Homo sapiens OX=9606 GN=DDX39A PE=1 SV=2	FALSE	TRUE	27.8689	11	15	4	427	49.1	High	High	High	High	High	High		0.793	0.924	0.591	0.769333	0.167757	21.8055	310.3	246	255	235.5	375	221.5	7	7	7	7	7	7	39.71
High	P22087	rRNA 2'-O-methyltransferase fibrillarin OS=Homo sapiens OX=9606 GN=FBL PE=1 SV=2	FALSE	TRUE	38.3178	11	15	11	321	33.8	High	High	High	High	High	High		0.738	0.987	0.584	0.769667	0.203358	26.4215	490.4	361.8	408.2	403	655.7	383.2	9	9	9	9	9	9	38.09
High	A0A024R7J0	Protein kinase, cAMP-dependent, catalytic, alpha, isoform CRA_c OS=Homo sapiens OX=9606 GN=PRKACA PE=3 SV=1	FALSE	TRUE	33.6182	11	14	5	351	40.6	High	High	High	High	High	High		0.801	0.997	0.538	0.778667	0.230314	29.5779	514.3	411.7	399.9	398.6	660.6	355.3	9	9	9	9	9	9	38.95
High	A0A024R0H6	Paf1, RNA polymerase II associated factor, homolog (S. cerevisiae), isoform CRA_a OS=Homo sapiens OX=9606 GN=PAF1 PE=4 SV=1	FALSE	TRUE	24.4821	11	18	11	531	59.9	High	High	High	High	High	High		0.717	1.117	0.523	0.785667	0.302895	38.5526	553.5	396.8	402.7	449.7	730.5	381.8	11	11	11	11	11	11	53.3
High	Q8WWY3	U4/U6 small nuclear ribonucleoprotein Prp31 OS=Homo sapiens OX=9606 GN=PRPF31 PE=1 SV=2	FALSE	TRUE	20.2405	11	12	11	499	55.4	High	High	High	High	High	High		0.728	1.017	0.616	0.787	0.206908	26.2907	191.2	139.2	158.1	160.7	235.4	144.9	6	6	6	6	6	6	25.94
High	A8K521	DNA helicase OS=Homo sapiens OX=9606 PE=2 SV=1	FALSE	TRUE	16.6213	11	11	11	734	82.2	High	High	High	High	High	High		0.923	0.896	0.549	0.789333	0.208572	26.4238	61.9	57.1	51.7	46.3	76.3	41.9	4	4	4	4	4	4	26.79
High	A0A024RDV3	Retinoblastoma 1 (Including osteosarcoma), isoform CRA_a OS=Homo sapiens OX=9606 GN=RB1 PE=4 SV=1	FALSE	TRUE	11.9612	11	11	11	928	106.1	High	High	High	High	High	High		0.78	1.083	0.548	0.803667	0.268284	33.3825	223	174.1	162.9	176.3	281.7	154.3	9	9	9	9	9	9	25.22
High	B3V096	BetaCstF-64 variant 2 OS=Homo sapiens OX=9606 GN=CSTF2 PE=2 SV=1	FALSE	TRUE	25.9631	11	17	5	597	62.9	High	High	High	High	High	High		0.726	1.144	0.547	0.805667	0.30637	38.0268	347.3	252.1	260.9	298.5	458.8	251.1	8	8	8	8	8	8	51.13
High	A0A0S2Z3G3	Solute carrier family 25 (Mitochondrial carrier dicarboxylate transporter), member 10, isoform CRA_a (Fragment) OS=Homo sapiens OX=9606 GN=SLC25A10 PE=2 SV=1	FALSE	TRUE	50.3378	11	14	11	296	32.1	High	High	High	High	High	High		0.857	0.985	0.583	0.808333	0.205371	25.4067	168.8	144.7	143.9	141.8	221.2	129	7	7	7	7	7	7	44.95
High	P35998	26S proteasome regulatory subunit 7 OS=Homo sapiens OX=9606 GN=PSMC2 PE=1 SV=3	FALSE	TRUE	30.9469	11	13	11	433	48.6	High	High	High	High	High	High		0.861	0.941	0.631	0.811	0.160935	19.844	188.6	162.5	165.2	155.4	245.1	154.6	6	6	6	6	6	6	30.59
High	A8K905	Nucleolar complex protein 3 homolog OS=Homo sapiens OX=9606 PE=2 SV=1	FALSE	TRUE	16.25	11	11	11	800	92.5	High	High	High	High	High	High		0.913	0.963	0.602	0.826	0.195594	23.6797	230.1	210.1	197	189.8	301.9	181.6	7	7	7	7	7	7	31.11
High	P36542	ATP synthase subunit gamma, mitochondrial OS=Homo sapiens OX=9606 GN=ATP5F1C PE=1 SV=1	FALSE	TRUE	34.2282	11	19	10	298	33	High	High	High	High	High	High		0.868	1.014	0.602	0.828	0.208892	25.2285	689.6	598.4	579.4	587.6	937.3	563.8	12	12	12	12	12	12	43.26
High	Q9NVV4	Poly(A) RNA polymerase, mitochondrial OS=Homo sapiens OX=9606 GN=MTPAP PE=1 SV=1	FALSE	TRUE	23.0241	11	13	11	582	66.1	High	High	High	High	High	High		0.879	1.04	0.572	0.830333	0.237765	28.6349	337.7	296.9	276.9	288	429.2	245.3	10	10	10	10	10	10	29.32
High	O94842	TOX high mobility group box family member 4 OS=Homo sapiens OX=9606 GN=TOX4 PE=1 SV=1	FALSE	TRUE	20.6119	11	19	9	621	66.2	High	High	High	High	High	High		0.723	1.269	0.515	0.835667	0.389422	46.6001	418.6	302.7	290.7	369	555.3	285.8	11	11	11	11	11	11	62.73
High	Q5T3I0	G patch domain-containing protein 4 OS=Homo sapiens OX=9606 GN=GPATCH4 PE=1 SV=2	FALSE	TRUE	29.148	11	15	11	446	50.4	High	High	High	High	High	High		0.869	1.14	0.554	0.854333	0.293275	34.328	173.3	150.6	128.1	146	214.8	118.9	8	8	8	8	8	8	43.9
High	P04406	Glyceraldehyde-3-phosphate dehydrogenase OS=Homo sapiens OX=9606 GN=GAPDH PE=1 SV=3	FALSE	TRUE	40	11	14	11	335	36	High	High	High	High	High	High		0.88	0.591	1.109	0.86	0.259579	30.1835	300.2	264.3	442	261.4	352.8	391.1	7	7	7	7	7	7	35.85
High	Q9NVM9	Integrator complex subunit 13 OS=Homo sapiens OX=9606 GN=INTS13 PE=1 SV=2	FALSE	TRUE	16.5722	11	12	11	706	80.2	High	High	High	High	High	High		0.869	1.134	0.58	0.861	0.277087	32.182	239.2	208	180.8	204.9	315.3	182.9	7	7	7	7	7	7	25.9
High	Q16630	Cleavage and polyadenylation specificity factor subunit 6 OS=Homo sapiens OX=9606 GN=CPSF6 PE=1 SV=2	FALSE	TRUE	20.5082	11	16	11	551	59.2	High	High	High	High	High	High		0.821	1.221	0.542	0.861333	0.341292	39.6237	210.3	172.7	156.2	190.8	294.9	159.8	9	9	9	9	9	9	45.75
High	P21127	Cyclin-dependent kinase 11B OS=Homo sapiens OX=9606 GN=CDK11B PE=1 SV=4	FALSE	TRUE	12.2013	11	11	11	795	92.6	High	High	High	High	High	High		0.767	1.234	0.583	0.861333	0.335595	38.9623	177.8	136.4	125.1	154.3	230.6	134.4	7	7	7	7	7	7	24.03
High	B7ZMF2	Fanconi anemia, complementation group I OS=Homo sapiens OX=9606 GN=FANCI PE=2 SV=1	FALSE	TRUE	10.0904	11	11	11	1328	149.2	High	High	High	High	High	High		0.864	1.158	0.564	0.862	0.297005	34.4553	189.4	163.7	143.4	166.1	251.5	141.8	7	7	7	7	7	7	27.02
High	Q96P70	Importin-9 OS=Homo sapiens OX=9606 GN=IPO9 PE=1 SV=3	FALSE	TRUE	12.2959	11	12	11	1041	115.9	High	High	High	High	High	High		0.973	1.102	0.53	0.868333	0.300021	34.5513	114.6	111.4	95.4	105.1	160.5	85.1	7	7	7	7	7	7	35.16
High	P09661	U2 small nuclear ribonucleoprotein A' OS=Homo sapiens OX=9606 GN=SNRPA1 PE=1 SV=2	FALSE	TRUE	36.0784	11	12	11	255	28.4	High	High	High	High	High	High		0.909	1.061	0.642	0.870667	0.212114	24.3622	237.6	216	181	192	303	194.5	9	9	9	9	9	9	27.48
High	Q14241	Elongin-A OS=Homo sapiens OX=9606 GN=ELOA PE=1 SV=2	FALSE	TRUE	15.2882	11	13	11	798	89.9	High	High	High	High	High	High		0.819	1.251	0.556	0.875333	0.350908	40.0885	338.8	277.6	262.4	328.2	426.6	237	8	8	8	8	8	8	28.84
High	A6NHR9	Structural maintenance of chromosomes flexible hinge domain-containing protein 1 OS=Homo sapiens OX=9606 GN=SMCHD1 PE=1 SV=2	FALSE	TRUE	6.38404	11	11	11	2005	226.2	High	High	High	High	High	High		0.901	1.116	0.613	0.876667	0.252381	28.7887	117.3	105.7	96.6	107.9	165.1	101.2	5	5	5	5	5	5	26.73
High	Q9Y305	Acyl-coenzyme A thioesterase 9, mitochondrial OS=Homo sapiens OX=9606 GN=ACOT9 PE=1 SV=2	FALSE	TRUE	27.7904	11	13	11	439	49.9	High	High	High	High	High	High		0.912	1.054	0.697	0.887667	0.17974	20.2485	144.6	131.9	131.3	138.3	197.7	137.7	7	7	7	7	7	7	27.44
High	Q13330	Metastasis-associated protein MTA1 OS=Homo sapiens OX=9606 GN=MTA1 PE=1 SV=2	FALSE	TRUE	15.2448	11	11	7	715	80.7	High	High	High	High	High	High		0.847	1.233	0.622	0.900667	0.309015	34.3096	237.7	201.3	177.8	219.2	305.8	190.3	7	7	7	7	7	7	24.9
High	B5ME19	Eukaryotic translation initiation factor 3 subunit C-like protein OS=Homo sapiens OX=9606 GN=EIF3CL PE=3 SV=1	FALSE	TRUE	11.9256	11	11	11	914	105.4	High	High	High	High	High	High		0.946	1.014	0.765	0.908333	0.128702	14.1691	99	93.7	89.6	90.8	107.2	82	4	4	4	4	4	4	24.98
High	P19387	DNA-directed RNA polymerase II subunit RPB3 OS=Homo sapiens OX=9606 GN=POLR2C PE=1 SV=2	FALSE	TRUE	53.0909	11	28	11	275	31.4	High	High	High	High	High	High		0.822	1.221	0.73	0.924333	0.261006	28.2373	551.6	453.3	406.8	496.7	705	514.4	7	7	7	7	7	7	92.27
High	P06733	Alpha-enolase OS=Homo sapiens OX=9606 GN=ENO1 PE=1 SV=2	FALSE	TRUE	26.7281	11	14	11	434	47.1	High	High	High	High	High	High		0.978	0.836	0.985	0.933	0.0840773	9.01151	134.3	131.4	191.8	160.3	205.1	202	8	8	8	8	8	8	35.73
High	O60664	Perilipin-3 OS=Homo sapiens OX=9606 GN=PLIN3 PE=1 SV=3	FALSE	TRUE	29.4931	11	11	11	434	47	High	High	High	High	High	High		0.894	1.269	0.671	0.944667	0.302202	31.9904	166.9	149.2	136.2	172.9	218.2	146.5	9	9	9	9	9	9	25.31
High	B2R491	40S ribosomal protein S4 OS=Homo sapiens OX=9606 GN=RPS4X PE=2 SV=1	FALSE	TRUE	43.346	11	13	11	263	29.6	High	High	High	High	High	High		0.991	0.745	1.128	0.954667	0.194068	20.3283	81	80.3	90	67	93.5	105.5	5	5	5	5	5	5	34.43
High	Q7Z589	BRCA2-interacting transcriptional repressor EMSY OS=Homo sapiens OX=9606 GN=EMSY PE=1 SV=2	FALSE	TRUE	10.8169	11	11	11	1322	141.4	High	High	High	High	High	High		0.902	1.366	0.61	0.959333	0.381247	39.7408	151.2	136.4	115	157.1	203.4	124.1	6	6	6	6	6	6	24.1
High	B2R5T2	cDNA, FLJ92608, highly similar to Homo sapiens aldehyde dehydrogenase 1 family, member A3 (ALDH1A3), mRNA OS=Homo sapiens OX=9606 PE=2 SV=1	FALSE	TRUE	25.7812	11	11	10	512	56.1	High	High	High	High	High	High		1.103	1.068	0.756	0.975667	0.19104	19.5805	208.7	230.2	207.2	221.4	277.6	210	7	7	7	7	7	7	29.53
High	A3R0T7	Liver histone H1e OS=Homo sapiens OX=9606 PE=2 SV=1	FALSE	TRUE	35.1598	11	16	4	219	21.9	High	High	High	High	High	High		1.34	0.973	0.855	1.056	0.252929	23.9516	438.7	588	491.9	478.8	648.2	554.3	9	9	9	9	9	9	35.63
High	Q9UPP1	Histone lysine demethylase PHF8 OS=Homo sapiens OX=9606 GN=PHF8 PE=1 SV=3	FALSE	TRUE	12.7358	11	13	9	1060	117.8	High	High	High	High	High	High		0.953	1.49	0.729	1.05733	0.391081	36.9875	173.8	165.7	128.4	191.3	224.6	163.8	6	6	6	6	6	6	24.97
High	P78386	Keratin, type II cuticular Hb5 OS=Homo sapiens OX=9606 GN=KRT85 PE=1 SV=1	TRUE	TRUE	20.3156	11	16	1	507	55.8	High	High	High	Not Found	High	High		0.03	0.01	3.87	1.30333	2.22282	170.549	280.9	8.5	0.9		2.3	8.9	2	2	1		1	1	30.82
High	P05784	Keratin, type I cytoskeletal 18 OS=Mus musculus GN=Krt18 PE=1 SV=5	TRUE	FALSE	24.5863	11	39	1	423	47.5	Medium	Medium	Medium	High	High	Medium					#DIV/0!	#DIV/0!	#DIV/0!													95.15
High	Q12873	Chromodomain-helicase-DNA-binding protein 3 OS=Homo sapiens OX=9606 GN=CHD3 PE=1 SV=3	FALSE	TRUE	5.1	11	15	1	2000	226.5	Not Found	High	Not Found	Not Found	High	Not Found					#DIV/0!	#DIV/0!	#DIV/0!													37.2
High	A0A024RAZ7	Heterogeneous nuclear ribonucleoprotein A1, isoform CRA_b OS=Homo sapiens OX=9606 GN=HNRPA1 PE=4 SV=1	FALSE	TRUE	28.7634	10	19	7	372	38.7	High	High	High	High	High	High		0.717	0.969	0.424	0.703333	0.272757	38.7806	410.2	294.2	356.3	345.3	604.7	256.5	7	7	7	7	7	7	53.98
High	P23396	40S ribosomal protein S3 OS=Homo sapiens OX=9606 GN=RPS3 PE=1 SV=2	FALSE	TRUE	49.7942	10	13	10	243	26.7	High	High	High	High	High	High		0.885	0.596	0.804	0.761667	0.149078	19.5726	292.6	258.9	386.6	230.4	367.7	295.5	7	7	7	7	7	7	35.07
High	Q9NZ01	Very-long-chain enoyl-CoA reductase OS=Homo sapiens OX=9606 GN=TECR PE=1 SV=1	FALSE	TRUE	28.5714	10	15	10	308	36	High	High	High	High	High	High		0.878	0.805	0.61	0.764333	0.138551	18.127	471.8	414.4	505.5	407.1	629.6	383.8	8	8	8	8	8	8	27.97
High	P42285	Exosome RNA helicase MTR4 OS=Homo sapiens OX=9606 GN=MTREX PE=1 SV=3	FALSE	TRUE	10.4607	10	10	10	1042	117.7	High	High	High	High	High	High		0.828	0.963	0.552	0.781	0.209492	26.8236	205.3	170.1	198.9	191.5	299.3	165.3	7	7	7	7	7	7	18.41
High	Q9NSE4	Isoleucine--tRNA ligase, mitochondrial OS=Homo sapiens OX=9606 GN=IARS2 PE=1 SV=2	FALSE	TRUE	11.8577	10	10	10	1012	113.7	High	High	High	High	High	High		0.633	1.024	0.71	0.789	0.207126	26.2517	265.6	168.1	191.5	196	286	203.1	5	5	5	5	5	5	19.54
High	A8K6U7	cDNA FLJ78252, highly similar to Homo sapiens heterogeneous nuclear ribonucleoprotein U-like 1 (HNRPUL1), transcript variant 1, mRNA OS=Homo sapiens OX=9606 PE=2 SV=1	FALSE	TRUE	12.2664	10	13	10	856	95.6	High	High	High	High	High	High		0.727	1.067	0.577	0.790333	0.251064	31.7669	323.2	235	264.7	282.4	430.5	248.2	8	8	8	8	8	8	33.59
High	Q53GQ0	Very-long-chain 3-oxoacyl-CoA reductase OS=Homo sapiens OX=9606 GN=HSD17B12 PE=1 SV=2	FALSE	TRUE	36.2179	10	12	10	312	34.3	High	High	High	High	High	High		0.799	1.038	0.536	0.791	0.251096	31.7441	309.1	247	240.8	249.9	418.5	224.2	9	9	9	9	9	9	35.84
High	Q9Y2X3	Nucleolar protein 58 OS=Homo sapiens OX=9606 GN=NOP58 PE=1 SV=1	FALSE	TRUE	21.5501	10	10	10	529	59.5	High	High	High	High	High	High		0.814	0.985	0.577	0.792	0.204888	25.8697	301.5	245.6	238	234.5	384	221.4	9	9	9	9	9	9	23.9
High	Q9BWT3	Poly(A) polymerase gamma OS=Homo sapiens OX=9606 GN=PAPOLG PE=1 SV=2	FALSE	TRUE	14.6739	10	10	8	736	82.8	High	High	High	High	High	High		0.748	1.072	0.572	0.797333	0.253624	31.8091	197.2	147.6	151.1	162	261	149.3	8	8	8	8	8	8	25.19
High	P31153	S-adenosylmethionine synthase isoform type-2 OS=Homo sapiens OX=9606 GN=MAT2A PE=1 SV=1	FALSE	TRUE	32.1519	10	12	10	395	43.6	High	High	High	High	High	High		0.918	0.992	0.499	0.803	0.265859	33.1082	171.2	157.1	164	162.6	265.1	132.2	6	6	6	6	6	6	31.05
High	P15880	40S ribosomal protein S2 OS=Homo sapiens OX=9606 GN=RPS2 PE=1 SV=2	FALSE	TRUE	34.1297	10	12	10	293	31.3	High	High	High	High	High	High		0.853	0.73	0.864	0.815667	0.0743931	9.12053	277.3	236.5	303.3	221.3	308.9	267	7	7	7	7	7	7	30.45
High	Q29RF7	Sister chromatid cohesion protein PDS5 homolog A OS=Homo sapiens OX=9606 GN=PDS5A PE=1 SV=1	FALSE	TRUE	8.15258	10	11	10	1337	150.7	High	High	High	High	High	High		0.97	0.954	0.525	0.816333	0.252429	30.9223	107.8	104.5	98.5	94	136.5	71.7	4	4	4	4	4	4	30.73
High	B2RDN9	cDNA, FLJ96699, highly similar to Homo sapiens thyroid autoantigen 70kDa (Ku antigen) (G22P1), mRNA OS=Homo sapiens OX=9606 PE=2 SV=1	FALSE	TRUE	16.5846	10	11	10	609	69.7	High	High	High	High	High	High		0.842	0.96	0.651	0.817667	0.155931	19.0702	248.4	209.2	227.6	218.6	341.2	222	6	6	6	6	6	6	31.81
High	Q92538	Golgi-specific brefeldin A-resistance guanine nucleotide exchange factor 1 OS=Homo sapiens OX=9606 GN=GBF1 PE=1 SV=2	FALSE	TRUE	6.45508	10	10	10	1859	206.3	High	High	High	High	High	High		0.763	1.156	0.558	0.825667	0.303885	36.8049	88.9	67.9	59.6	68.9	107.1	59.8	5	5	5	5	5	5	23.49
High	A0A024R419	KIAA0971, isoform CRA_b OS=Homo sapiens OX=9606 GN=KIAA0971 PE=4 SV=1	FALSE	TRUE	15.9155	10	10	10	710	81.4	High	High	High	High	High	High		0.843	0.991	0.655	0.829667	0.168396	20.2969	178.6	150.5	152.9	151.6	221.1	144.8	7	7	7	7	7	7	22.95
High	O15014	Zinc finger protein 609 OS=Homo sapiens OX=9606 GN=ZNF609 PE=1 SV=2	FALSE	TRUE	6.44933	10	10	10	1411	151.1	High	High	High	High	High	High		0.807	1.063	0.62	0.83	0.222394	26.7944	137.8	111.2	118.6	126.1	179.7	111.4	8	8	8	8	8	8	24.02
High	Q96GQ7	Probable ATP-dependent RNA helicase DDX27 OS=Homo sapiens OX=9606 GN=DDX27 PE=1 SV=2	FALSE	TRUE	13.4422	10	11	10	796	89.8	High	High	High	High	High	High		0.942	0.938	0.613	0.831	0.188804	22.7201	173.6	163.5	152.5	143	237	145.3	6	6	6	6	6	6	27.31
High	Q5SSJ5	Heterochromatin protein 1-binding protein 3 OS=Homo sapiens OX=9606 GN=HP1BP3 PE=1 SV=1	FALSE	TRUE	17.179	10	10	10	553	61.2	High	High	High	High	High	High		0.872	1.057	0.59	0.839667	0.235173	28.0079	174.2	151.9	141.7	149.7	241	142.2	7	7	7	7	7	7	19.02
High	Q5T5X7	BEN domain-containing protein 3 OS=Homo sapiens OX=9606 GN=BEND3 PE=1 SV=1	FALSE	TRUE	15.942	10	10	10	828	94.4	High	High	High	High	High	High		0.749	1.189	0.597	0.845	0.307454	36.3851	119.6	89.6	91.7	109.1	161.5	96.4	6	6	6	6	6	6	26.61
High	Q9BPX3	Condensin complex subunit 3 OS=Homo sapiens OX=9606 GN=NCAPG PE=1 SV=1	FALSE	TRUE	11.8227	10	10	10	1015	114.3	High	High	High	High	High	High		0.899	1.117	0.535	0.850333	0.294036	34.5789	91.9	82.7	74.2	82.9	120.5	64.5	5	5	5	5	5	5	26.33
High	A0A024R753	RNA binding motif protein 28 isoform 1 OS=Homo sapiens OX=9606 GN=RBM28 PE=2 SV=1	FALSE	TRUE	14.7563	10	11	10	759	85.7	High	High	High	High	High	High		0.919	1.121	0.516	0.852	0.308015	36.1519	90	82.6	64.3	72.1	112.2	57.9	4	4	4	4	4	4	28.09
High	A0A024R6W2	Nudix (Nucleoside diphosphate linked moiety X)-type motif 21, isoform CRA_a OS=Homo sapiens OX=9606 GN=NUDT21 PE=4 SV=1	FALSE	TRUE	33.4802	10	13	10	227	26.2	High	High	High	High	High	High		0.842	1.169	0.577	0.862667	0.296541	34.3749	384	323.2	306.2	358	516.7	298.2	7	7	7	7	7	7	37
High	Q12769	Nuclear pore complex protein Nup160 OS=Homo sapiens OX=9606 GN=NUP160 PE=1 SV=3	FALSE	TRUE	8.84401	10	11	10	1436	162	High	High	High	High	High	High		0.938	0.897	0.753	0.862667	0.0971614	11.2629	67.4	63.2	63.9	57.3	86.9	65.4	4	4	4	4	4	4	24.6
High	Q9NTJ3	Structural maintenance of chromosomes protein 4 OS=Homo sapiens OX=9606 GN=SMC4 PE=1 SV=2	FALSE	TRUE	7.53106	10	10	10	1288	147.1	High	High	High	High	High	High		0.912	1.101	0.575	0.862667	0.266448	30.8865	146.1	133.3	114.8	126.3	189	108.7	6	6	6	6	6	6	21.46
High	Q02978	Mitochondrial 2-oxoglutarate/malate carrier protein OS=Homo sapiens OX=9606 GN=SLC25A11 PE=1 SV=3	FALSE	TRUE	33.758	10	12	10	314	34	High	High	High	High	High	High		0.926	1.088	0.591	0.868333	0.253469	29.1902	241.6	223.7	207.2	225.4	332.4	196.5	8	8	8	8	8	8	29.34
High	A0A1U9XBB2	MDC1 OS=Homo sapiens OX=9606 PE=4 SV=1	FALSE	TRUE	7.56343	10	10	10	2089	226.6	High	High	High	High	High	High		0.972	1.182	0.453	0.869	0.375256	43.1825	22.3	21.6	20.1	23.7	33.3	15.1	2	2	2	2	2	2	26.54
High	A8K4A1	cDNA FLJ76790 OS=Homo sapiens OX=9606 PE=2 SV=1	FALSE	TRUE	10.6957	10	11	10	963	108.1	High	High	High	High	High	High		0.81	1.2	0.604	0.871333	0.302697	34.7395	76.6	62	58.5	70.2	96.5	58.3	3	3	3	3	3	3	25.58
High	P17980	26S proteasome regulatory subunit 6A OS=Homo sapiens OX=9606 GN=PSMC3 PE=1 SV=3	FALSE	TRUE	29.6128	10	11	10	439	49.2	High	High	High	High	High	High		0.962	1.067	0.595	0.874667	0.247823	28.3334	174.4	167.8	150.7	160.8	247.8	147.4	7	7	7	7	7	7	29.82
High	Q8TDN6	Ribosome biogenesis protein BRX1 homolog OS=Homo sapiens OX=9606 GN=BRIX1 PE=1 SV=2	FALSE	TRUE	35.9773	10	12	10	353	41.4	High	High	High	High	High	High		0.798	1.163	0.667	0.876	0.257035	29.3419	244.5	195.1	197.3	229.4	320.9	213.9	7	7	7	7	7	7	31.76
High	F8W930	Insulin-like growth factor 2 mRNA-binding protein 2 OS=Homo sapiens OX=9606 GN=IGF2BP2 PE=1 SV=1	FALSE	TRUE	20.1653	10	11	10	605	66.7	High	High	High	High	High	High		0.899	1.095	0.641	0.878333	0.227704	25.9246	143.2	128.8	115.3	126.2	177.6	113.8	6	6	6	6	6	6	23.79
High	Q71DI3	Histone H3.2 OS=Homo sapiens OX=9606 GN=HIST2H3A PE=1 SV=3	FALSE	TRUE	59.5588	10	21	3	136	15.4	High	High	High	High	High	High		0.884	1.106	0.663	0.884333	0.2215	25.0471	900.5	795.6	712	787.1	1093.8	725.4	10	10	10	10	10	10	31.84
High	Q8NI27	THO complex subunit 2 OS=Homo sapiens OX=9606 GN=THOC2 PE=1 SV=2	FALSE	TRUE	5.27307	10	10	10	1593	182.7	High	High	High	High	High	High		0.911	1.101	0.649	0.887	0.226954	25.5867	139.5	127.2	115.7	127.4	160.2	104	5	5	5	5	5	5	22.22
High	Q9UBU9	Nuclear RNA export factor 1 OS=Homo sapiens OX=9606 GN=NXF1 PE=1 SV=1	FALSE	TRUE	18.2553	10	11	10	619	70.1	High	High	High	High	High	High		0.872	1.222	0.578	0.890667	0.322406	36.1982	69.5	60.6	52.1	63.6	90.8	52.5	4	4	4	4	4	4	30.56
High	V9HW01	Epididymis secretory protein Li 310 OS=Homo sapiens OX=9606 GN=HEL-S-310 PE=2 SV=1	FALSE	TRUE	43.949	10	17	10	157	17.8	High	High	High	High	High	High		1.008	0.986	0.687	0.893667	0.179316	20.0652	523	527	464	457.6	698.6	480	10	10	10	10	10	10	38.72
High	Q6IT96	Histone deacetylase OS=Homo sapiens OX=9606 GN=HDAC1 PE=1 SV=1	FALSE	TRUE	23.8589	10	10	9	482	55.1	High	High	High	High	High	High		0.891	1.158	0.654	0.901	0.252149	27.9854	185.1	164.9	163.5	189.4	248.2	162.2	7	7	7	7	7	7	24.1
High	B2R9Y2	cDNA, FLJ94609 OS=Homo sapiens OX=9606 PE=2 SV=1	FALSE	TRUE	18.4588	10	11	10	558	66.3	High	High	High	High	High	High		0.847	1.257	0.616	0.906667	0.324639	35.8057	307.8	260.8	237	297.9	397.3	244.9	9	9	9	9	9	9	17.35
High	Q96G25	Mediator of RNA polymerase II transcription subunit 8 OS=Homo sapiens OX=9606 GN=MED8 PE=1 SV=2	FALSE	TRUE	42.9104	10	10	10	268	29.1	High	High	High	High	High	High		0.946	1.13	0.671	0.915667	0.230999	25.2274	146.4	138.4	118.6	134	195	130.8	6	6	6	6	6	6	21.96
High	A8K670	Nitric oxide synthase-interacting protein OS=Homo sapiens OX=9606 PE=2 SV=1	FALSE	TRUE	47.1761	10	12	10	301	33.2	High	High	High	High	High	High		0.827	1.311	0.633	0.923667	0.349184	37.8041	144.6	119.6	108.5	142.2	185.3	117.3	7	7	7	7	7	7	33.86
High	C8C504	Beta-globin OS=Homo sapiens OX=9606 GN=HBB PE=3 SV=1	TRUE	TRUE	75.5102	10	31	5	147	16	High	High	High	High	High	High		0.787	0.989	1.001	0.925667	0.120239	12.9894	463.3	364.5	495.4	490.1	495.5	496.1	9	9	9	9	9	9	97.69
High	B2RBE0	cDNA, FLJ95462, highly similar to Homo sapiens fatty-acid-Coenzyme A ligase, long-chain 3 (FACL3),mRNA OS=Homo sapiens OX=9606 PE=2 SV=1	FALSE	TRUE	16.3889	10	10	10	720	80.3	High	High	High	High	High	High		0.759	1.183	0.858	0.933333	0.221811	23.7655	137.2	104.1	114.9	136	151.2	129.7	7	7	7	7	7	7	25.1
High	A0A024R4M0	40S ribosomal protein S9 OS=Homo sapiens OX=9606 GN=RPS9 PE=1 SV=1	FALSE	TRUE	37.6289	10	13	10	194	22.6	High	High	High	High	High	High		0.927	0.989	0.904	0.94	0.0439659	4.67722	264	244.9	257.9	255.1	303.9	274.7	9	9	9	9	9	9	31.4
High	P07384	Calpain-1 catalytic subunit OS=Homo sapiens OX=9606 GN=CAPN1 PE=1 SV=1	FALSE	TRUE	14.4258	10	10	10	714	81.8	High	High	High	High	High	High		0.871	1.13	0.931	0.977333	0.135574	13.8718	113.5	98.9	106.5	120.3	131	121.9	5	5	5	5	5	5	20.21
High	P06737	Glycogen phosphorylase, liver form OS=Homo sapiens OX=9606 GN=PYGL PE=1 SV=4	FALSE	TRUE	12.5148	10	10	7	847	97.1	High	High	High	High	High	High		0.997	1.234	0.735	0.988667	0.249604	25.2466	103.5	103.1	94.2	116.3	131.8	96.9	5	5	5	5	5	5	27.19
High	A0A0S2Z4Z6	Serine/arginine repetitive matrix 1 isoform 2 (Fragment) OS=Homo sapiens OX=9606 GN=SRRM1 PE=1 SV=1	FALSE	TRUE	16.4488	10	12	10	918	103.9	High	High	High	High	High	High		0.896	1.375	0.698	0.989667	0.348084	35.1718	302.3	270.8	240.7	331.1	393	274.3	7	7	7	7	7	7	36.79
High	C9JA08	60S ribosomal export protein NMD3 OS=Homo sapiens OX=9606 GN=NMD3 PE=1 SV=1	FALSE	TRUE	21.3611	10	11	10	529	60.1	High	High	High	High	High	High		1.363	1.102	0.675	1.04667	0.347322	33.1836	174.5	237.9	140.8	155.1	224	151.2	7	7	7	7	7	7	24.65
High	B3KNS8	cDNA FLJ30322 fis, clone BRACE2006703, highly similar to Surfeit locus protein 6 OS=Homo sapiens OX=9606 PE=2 SV=1	FALSE	TRUE	23.5457	10	12	10	361	41.5	High	High	High	High	High	High		1.02	1.216	1.128	1.12133	0.0981699	8.75475	235.8	240.6	208.3	253.3	225.2	254.1	8	8	8	8	8	8	27.01
High	Q9Y277	Voltage-dependent anion-selective channel protein 3 OS=Homo sapiens OX=9606 GN=VDAC3 PE=1 SV=1	FALSE	TRUE	42.4028	10	18	8	283	30.6	High	High	High	High	High	High		1.087	1.407	0.939	1.14433	0.23921	20.9039	272.7	296.3	217.3	305.9	328	308.1	7	7	7	7	7	7	52.75
High	A0A024QZN9	Voltage-dependent anion channel 2, isoform CRA_a OS=Homo sapiens OX=9606 GN=VDAC2 PE=4 SV=1	FALSE	TRUE	41.6928	10	14	9	319	34.5	High	High	High	High	High	High		1.045	1.301	1.2	1.182	0.128946	10.9091	291.5	304.8	267.3	347.7	329.3	395	7	7	7	7	7	7	38.21
High	P16403	Histone H1.2 OS=Homo sapiens OX=9606 GN=HIST1H1C PE=1 SV=2	FALSE	TRUE	35.6808	10	15	3	213	21.4	High	High	High	High	High	High		1.589	1.083	1.002	1.22467	0.318111	25.9753	29.9	47.5	33.6	36.4	48.8	48.9	1	1	1	1	1	1	36.08
High	Q05CW7	NAT10 protein (Fragment) OS=Homo sapiens OX=9606 GN=NAT10 PE=2 SV=1	FALSE	TRUE	18.5921	10	11	1	554	62.3	High	High	High	High	High	High					#DIV/0!	#DIV/0!	#DIV/0!													26.82
High	Q3TTY5	Keratin, type II cytoskeletal 2 epidermal OS=Mus musculus GN=Krt2 PE=1 SV=1	TRUE	TRUE	8.91089	10	22	0	707	70.9	Not Found	Not Found	Not Found	Not Found	Not Found	Not Found					#DIV/0!	#DIV/0!	#DIV/0!													47.43
High	Q08945	FACT complex subunit SSRP1 OS=Homo sapiens OX=9606 GN=SSRP1 PE=1 SV=1	FALSE	TRUE	13.3992	9	9	9	709	81	High	High	High	High	High	High		0.719	0.87	0.604	0.731	0.133405	18.2497	293.9	211.3	169.5	147.4	215.4	130	6	6	6	6	6	6	17.79
High	Q9H4L5	Oxysterol-binding protein-related protein 3 OS=Homo sapiens OX=9606 GN=OSBPL3 PE=1 SV=1	FALSE	TRUE	15.2198	9	10	9	887	101.2	High	High	High	High	High	High		0.775	0.917	0.521	0.737667	0.200622	27.1969	54.6	42.3	51.1	46.9	73	38	3	3	3	3	3	3	23.2
High	B3KM36	cDNA FLJ10153 fis, clone HEMBA1003417, highly similar to BAG family molecular chaperone regulator 2 OS=Homo sapiens OX=9606 PE=2 SV=1	FALSE	TRUE	47.8673	9	10	9	211	23.7	High	High	High	High	High	High		0.788	1.046	0.421	0.751667	0.31408	41.7845	178.6	140.8	153.1	160.2	290.8	122.5	6	6	6	6	6	6	27.96
High	A0A024RE04	Uncharacterized protein OS=Homo sapiens OX=9606 GN=RP11-98F14.6 PE=4 SV=1	FALSE	TRUE	23.8411	9	10	9	453	52.1	High	High	High	High	High	High		0.742	0.95	0.579	0.757	0.185954	24.5646	110.8	82.2	90.8	86.2	136.7	79.2	6	6	6	6	6	6	26.98
High	Q13619	Cullin-4A OS=Homo sapiens OX=9606 GN=CUL4A PE=1 SV=3	FALSE	TRUE	11.726	9	9	4	759	87.6	High	High	High	High	High	High		0.801	0.955	0.526	0.760667	0.217325	28.5704	137.5	110.1	111.9	106.9	197.8	104.1	5	5	5	5	5	5	20.16
High	Q9HBB9	HC56 OS=Homo sapiens OX=9606 PE=4 SV=1	FALSE	TRUE	8.6915	9	9	9	1047	118.7	High	High	High	High	High	High		0.787	0.947	0.594	0.776	0.176757	22.778	51.5	40.5	44.5	42.1	68.2	40.5	2	2	2	2	2	2	20.58
High	P06899	Histone H2B type 1-J OS=Homo sapiens OX=9606 GN=HIST1H2BJ PE=1 SV=3	FALSE	TRUE	57.9365	9	25	2	126	13.9	High	High	High	High	High	High		0.791	0.996	0.545	0.777333	0.22581	29.0494	104.4	82.6	83.5	83.2	132.8	72.4	2	2	2	2	2	2	68.47
High	P23246	Splicing factor, proline- and glutamine-rich OS=Homo sapiens OX=9606 GN=SFPQ PE=1 SV=2	FALSE	TRUE	12.5884	9	13	8	707	76.1	High	High	High	High	High	High		0.798	0.783	0.755	0.778667	0.0218251	2.80288	138.9	110.8	169.5	132.8	184.5	139.3	7	7	7	7	7	7	34.92
High	O00411	DNA-directed RNA polymerase, mitochondrial OS=Homo sapiens OX=9606 GN=POLRMT PE=1 SV=2	FALSE	TRUE	9.34959	9	10	9	1230	138.5	High	High	High	High	High	High		0.766	0.957	0.613	0.778667	0.172349	22.1339	187.1	143.2	140.4	134.3	215.4	132	5	5	5	5	5	5	29.02
High	Q59GX2	Solute carrier family 2 (Facilitated glucose transporter), member 1 variant (Fragment) OS=Homo sapiens OX=9606 PE=2 SV=1	FALSE	TRUE	13.3462	9	13	9	517	57	High	High	High	High	High	High		0.814	0.961	0.563	0.779333	0.201252	25.8236	328	267.1	260.5	250.2	430.1	242.3	9	9	9	9	9	9	28.9
High	P46977	Dolichyl-diphosphooligosaccharide--protein glycosyltransferase subunit STT3A OS=Homo sapiens OX=9606 GN=STT3A PE=1 SV=2	FALSE	TRUE	11.9149	9	10	8	705	80.5	High	High	High	High	High	High		0.846	0.921	0.572	0.779667	0.183713	23.563	300.9	254.6	242.3	223.1	365.4	209	8	8	8	8	8	8	23.06
High	P17858	ATP-dependent 6-phosphofructokinase, liver type OS=Homo sapiens OX=9606 GN=PFKL PE=1 SV=6	FALSE	TRUE	12.9487	9	13	4	780	85	High	High	High	High	High	High		0.794	1.037	0.514	0.781667	0.261718	33.4821	107.6	85.5	80.5	83.5	132.9	68.3	4	4	4	4	4	4	40.68
High	Q15386	Ubiquitin-protein ligase E3C OS=Homo sapiens OX=9606 GN=UBE3C PE=1 SV=3	FALSE	TRUE	8.77193	9	10	9	1083	123.8	High	High	High	High	High	High		0.804	1.039	0.545	0.796	0.247097	31.0424	92.6	74.5	76.1	79.1	110.7	60.3	5	5	5	5	5	5	21.11
High	A0A024RCM3	DDX39B OS=Homo sapiens OX=9606 GN=hCG_2005638 PE=4 SV=1	FALSE	TRUE	17.757	9	11	2	428	49	Medium	Medium	Medium	Medium	Medium	Medium		0.711	0.951	0.749	0.803667	0.129001	16.0516	40.1	28.5	35.8	34.1	43.9	32.9	2	2	2	2	2	2	26.56
High	P28290	Sperm-specific antigen 2 OS=Homo sapiens OX=9606 GN=SSFA2 PE=1 SV=3	FALSE	TRUE	8.02224	9	10	9	1259	138.3	High	High	High	High	High	High		0.835	1.028	0.558	0.807	0.236248	29.2748	234.2	195.6	192.7	198.1	313	174.7	6	6	6	6	6	6	27.39
High	Q9H0L4	Cleavage stimulation factor subunit 2 tau variant OS=Homo sapiens OX=9606 GN=CSTF2T PE=1 SV=1	FALSE	TRUE	19.1558	9	13	3	616	64.4	High	High	High	High	High	High		0.735	1.175	0.524	0.811333	0.332145	40.9382	96	70.5	64.7	76	119	62.4	2	2	2	2	2	2	36.68
High	P50570	Dynamin-2 OS=Homo sapiens OX=9606 GN=DNM2 PE=1 SV=2	FALSE	TRUE	10.2299	9	10	9	870	98	High	High	High	High	High	High		0.835	0.978	0.621	0.811333	0.179673	22.1454	186.3	155.5	169	165.2	243	151	2	2	2	2	2	2	19.89
High	O95782	AP-2 complex subunit alpha-1 OS=Homo sapiens OX=9606 GN=AP2A1 PE=1 SV=3	FALSE	TRUE	8.90481	9	9	5	977	107.5	High	High	High	High	High	High		0.883	0.922	0.629	0.811333	0.159105	19.6103	123.1	108.7	126.4	116.6	169.9	106.8	6	6	6	6	6	6	24
High	P18085	ADP-ribosylation factor 4 OS=Homo sapiens OX=9606 GN=ARF4 PE=1 SV=3	FALSE	TRUE	52.7778	9	12	6	180	20.5	High	High	High	High	High	High		0.693	1.091	0.654	0.812667	0.241831	29.7577	426.4	295.7	289.4	315.8	444.5	290.5	7	7	7	7	7	7	28.39
High	P04843	Dolichyl-diphosphooligosaccharide--protein glycosyltransferase subunit 1 OS=Homo sapiens OX=9606 GN=RPN1 PE=1 SV=1	FALSE	TRUE	15.6507	9	10	9	607	68.5	High	High	High	High	High	High		0.85	0.913	0.686	0.816333	0.117185	14.355	270.8	230.1	266.8	243.7	344.8	236.7	8	8	8	8	8	8	25.67
High	Q15020	Squamous cell carcinoma antigen recognized by T-cells 3 OS=Homo sapiens OX=9606 GN=SART3 PE=1 SV=1	FALSE	TRUE	9.86501	9	11	9	963	109.9	High	High	High	High	High	High		0.705	1.202	0.548	0.818333	0.341412	41.7204	116.4	82	84.8	102	151.7	83.1	5	5	5	5	5	5	30.78
High	B3KML1	cDNA FLJ11308 fis, clone PLACE1010074, highly similar to Sorting nexin-2 OS=Homo sapiens OX=9606 PE=2 SV=1	FALSE	TRUE	19.2678	9	10	9	519	58.4	High	High	High	High	High	High		0.901	1.018	0.548	0.822333	0.244676	29.7539	94.1	84.8	73.3	74.6	122	66.8	4	4	4	4	4	4	24.72
High	P62495	Eukaryotic peptide chain release factor subunit 1 OS=Homo sapiens OX=9606 GN=ETF1 PE=1 SV=3	FALSE	TRUE	26.087	9	10	9	437	49	High	High	High	High	High	High		0.813	1.041	0.617	0.823667	0.212201	25.763	174.3	141.7	129.8	135.1	197.1	121.7	7	7	7	7	7	7	28.49
High	Q13151	Heterogeneous nuclear ribonucleoprotein A0 OS=Homo sapiens OX=9606 GN=HNRNPA0 PE=1 SV=1	FALSE	TRUE	37.7049	9	15	7	305	30.8	High	High	High	High	High	High		0.831	1.094	0.55	0.825	0.27205	32.9757	110.6	91.8	82.1	89.8	148.1	81.5	5	5	5	5	5	5	45.3
High	Q15758	Neutral amino acid transporter B(0) OS=Homo sapiens OX=9606 GN=SLC1A5 PE=1 SV=2	FALSE	TRUE	22.366	9	11	9	541	56.6	High	High	High	High	High	High		0.872	0.972	0.632	0.825333	0.174738	21.1718	160.7	140.1	142.1	138.1	204.5	129.3	6	6	6	6	6	6	32.82
High	A8K7D9	Importin subunit alpha OS=Homo sapiens OX=9606 PE=2 SV=1	FALSE	TRUE	20.4159	9	14	9	529	57.8	High	High	High	High	High	High		0.903	1.031	0.548	0.827333	0.250233	30.2457	178.4	161.1	133.1	137.3	213.5	116.9	6	6	6	6	6	6	37.72
High	A0A2X0U4T9	RACGAP1 (Fragment) OS=Homo sapiens OX=9606 GN=RACGAP1 PE=4 SV=1	FALSE	TRUE	13.7224	9	11	9	634	71.2	High	High	High	High	High	High		0.826	1.129	0.533	0.829333	0.298014	35.9342	408.8	337.8	325.1	366.9	556.3	296.5	7	7	7	7	7	7	26.79
High	D9HTE9	Plasma membrane citrate carrier OS=Homo sapiens OX=9606 GN=SLC25A1 PE=2 SV=1	FALSE	TRUE	27.044	9	11	9	318	35	High	High	High	High	High	High		0.843	1.009	0.648	0.833333	0.180694	21.6833	318.4	268.4	264.2	266.7	424.5	275.2	9	9	9	9	9	9	24.79
High	Q86UE8	Serine/threonine-protein kinase tousled-like 2 OS=Homo sapiens OX=9606 GN=TLK2 PE=1 SV=2	FALSE	TRUE	10.3627	9	10	6	772	87.6	High	High	High	High	High	High		0.831	1.175	0.498	0.834667	0.338515	40.5569	251.9	209.4	190.5	223.8	338.6	168.5	6	6	6	6	6	6	26.65
High	Q53HB3	Proteasome 26S ATPase subunit 1 variant (Fragment) OS=Homo sapiens OX=9606 PE=1 SV=1	FALSE	TRUE	27.2727	9	11	8	440	49.2	High	High	High	High	High	High		0.917	0.873	0.72	0.836667	0.103404	12.359	79	72.5	72.4	63.2	99.8	71.9	4	4	4	4	4	4	24.77
High	A8K3K1	cDNA FLJ78096, highly similar to Homo sapiens actin, alpha, cardiac muscle (ACTC), mRNA OS=Homo sapiens OX=9606 PE=2 SV=1	FALSE	TRUE	25.1989	9	13	1	377	42	High	High	High	High	High	High		0.841	0.672	1	0.837667	0.164025	19.5812	12.4	10.4	15.3	10.3	14.3	14.3	1	1	1	1	1	1	36.35
High	B2R806	Eukaryotic translation initiation factor 3 subunit E OS=Homo sapiens OX=9606 GN=EIF3E PE=2 SV=1	FALSE	TRUE	20	9	11	9	445	52.2	High	High	High	High	High	High		0.855	0.996	0.665	0.838667	0.166103	19.8056	140.4	120.1	134.7	134.1	171.1	113.7	5	5	5	5	5	5	26.99
High	Q8WVC0	RNA polymerase-associated protein LEO1 OS=Homo sapiens OX=9606 GN=LEO1 PE=1 SV=1	FALSE	TRUE	15.1652	9	15	9	666	75.4	High	High	High	High	High	High		0.752	1.223	0.55	0.841667	0.345344	41.0309	501.2	377	351	429.2	644.9	354.9	7	7	7	7	7	7	39.92
High	B4DR52	Histone H2B OS=Homo sapiens OX=9606 PE=2 SV=1	FALSE	TRUE	43.9759	9	28	2	166	18	High	High	High	High	High	High		0.888	1.004	0.675	0.855667	0.166866	19.5013	963.4	855.5	859.4	863.1	1196	807.3	9	9	9	9	9	9	74.25
High	B7Z8Z6	DNA helicase OS=Homo sapiens OX=9606 PE=2 SV=1	FALSE	TRUE	11.3208	9	11	9	954	106.8	High	High	High	High	High	High		0.935	1.02	0.625	0.86	0.207906	24.1751	228.9	214.1	204	208.1	303	189.5	8	8	8	8	8	8	30.16
High	Q14247	Src substrate cortactin OS=Homo sapiens OX=9606 GN=CTTN PE=1 SV=2	FALSE	TRUE	21.2727	9	10	9	550	61.5	High	High	High	High	High	High		0.852	1.153	0.602	0.869	0.275893	31.7483	105.7	90	88.1	101.6	152.2	91.7	6	6	6	6	6	6	26.04
High	Q8TD26	Chromodomain-helicase-DNA-binding protein 6 OS=Homo sapiens OX=9606 GN=CHD6 PE=1 SV=4	FALSE	TRUE	4.1989	9	10	7	2715	305.2	High	High	High	High	High	High		0.773	1.202	0.651	0.875333	0.289403	33.0621	199.7	154.4	155.5	187	261.4	170.2	6	6	6	6	6	6	22.17
High	O76009	Keratin, type I cuticular Ha3-I OS=Homo sapiens GN=KRT33A PE=2 SV=2	TRUE	TRUE	20.5446	9	13	1	404	45.9	High	High	High	High	High	High		0.251	1.588	0.8	0.879667	0.672051	76.3984	31.2	7.8	6.8	10.8	14	11.2	1	1	1	1	1	1	28.54
High	E9PK25	Cofilin-1 OS=Homo sapiens OX=9606 GN=CFL1 PE=1 SV=1	FALSE	TRUE	47.0588	9	10	8	204	22.7	High	High	High	High	High	High		0.863	1.06	0.728	0.883667	0.166962	18.8942	321.4	277.4	301.6	319.6	407.6	296.7	7	7	7	7	7	7	24.2
High	Q6IPH7	RPL14 protein OS=Homo sapiens OX=9606 GN=RPL14 PE=1 SV=1	FALSE	TRUE	37.2727	9	12	9	220	23.8	High	High	High	High	High	High		0.988	0.955	0.716	0.886333	0.148433	16.7469	289.6	286	277.2	264.8	354.7	254	9	9	9	9	9	9	26.46
High	Q96JM3	Chromosome alignment-maintaining phosphoprotein 1 OS=Homo sapiens OX=9606 GN=CHAMP1 PE=1 SV=2	FALSE	TRUE	11.5764	9	10	9	812	89	High	High	High	High	High	High		0.893	1.213	0.579	0.895	0.317005	35.4195	247.7	221.2	207.8	252.1	373.3	216.2	7	7	7	7	7	7	22
High	Q5JR94	40S ribosomal protein S8 OS=Homo sapiens OX=9606 GN=RPS8 PE=2 SV=1	FALSE	TRUE	46.1538	9	18	9	208	24.2	High	High	High	High	High	High		0.873	0.988	0.85	0.903667	0.0739347	8.18163	368.1	321.3	353.8	349.7	451	383.5	8	8	8	8	8	8	56.94
High	Q6PJT7	Zinc finger CCCH domain-containing protein 14 OS=Homo sapiens OX=9606 GN=ZC3H14 PE=1 SV=1	FALSE	TRUE	14.538	9	9	9	736	82.8	High	High	High	High	High	High		0.802	1.299	0.614	0.905	0.353925	39.1077	167.9	134.6	117.5	152.7	205	125.8	6	6	6	6	6	6	26.22
High	A8K9K6	cDNA FLJ76962, highly similar to Homo sapiens nucleolar protein 5A (56kDa with KKE/D repeat) (NOL5A), mRNA OS=Homo sapiens OX=9606 PE=2 SV=1	FALSE	TRUE	17.3401	9	10	9	594	65.9	High	High	High	High	High	High		0.906	1.24	0.58	0.908667	0.330008	36.3178	256.1	232	202.3	250.9	350.4	203.1	7	7	7	7	7	7	20.73
High	P14866	Heterogeneous nuclear ribonucleoprotein L OS=Homo sapiens OX=9606 GN=HNRNPL PE=1 SV=2	FALSE	TRUE	19.8642	9	11	8	589	64.1	High	High	High	High	High	High		0.855	0.55	1.365	0.923333	0.411775	44.5965	160	136.8	261	143.5	200.5	273.7	8	8	8	8	8	8	31.82
High	B3KY60	cDNA FLJ16777 fis, clone BRHIP2029567, highly similar to Cell division cycle 5-like protein OS=Homo sapiens OX=9606 PE=2 SV=1	FALSE	TRUE	14.2145	9	9	9	802	92.2	High	High	High	High	High	High		0.804	1.393	0.608	0.935	0.408567	43.697	140.6	113.1	100.8	140.4	182.3	110.9	6	6	6	6	6	6	24.9
High	Q9H9B4	Sideroflexin-1 OS=Homo sapiens OX=9606 GN=SFXN1 PE=1 SV=4	FALSE	TRUE	31.677	9	11	8	322	35.6	High	High	High	High	High	High		0.949	1.157	0.705	0.937	0.226239	24.145	214.8	203.9	180.9	209.3	261.5	184.3	8	8	8	8	8	8	27.99
High	P62280	40S ribosomal protein S11 OS=Homo sapiens OX=9606 GN=RPS11 PE=1 SV=3	FALSE	TRUE	55.0633	9	13	9	158	18.4	High	High	High	High	High	High		0.928	1.066	0.835	0.943	0.116228	12.3254	346.4	321.4	325.3	346.8	421.8	352.3	6	6	6	6	6	6	33.65
High	A0A0C4DFX9	Negative elongation factor A OS=Homo sapiens OX=9606 GN=NELFA PE=1 SV=1	FALSE	TRUE	24.1187	9	9	9	539	58.5	High	High	High	High	High	High		0.884	1.387	0.589	0.953333	0.403493	42.3244	161	142.4	127.9	177.3	219.2	129	5	5	5	5	5	5	26.14
High	O75151	Lysine-specific demethylase PHF2 OS=Homo sapiens OX=9606 GN=PHF2 PE=1 SV=4	FALSE	TRUE	9.58029	9	9	8	1096	120.7	High	High	High	High	High	High		0.991	1.355	0.559	0.968333	0.398484	41.1515	56.6	56.1	43	58.3	80.8	45.2	3	3	3	3	3	3	21.94
High	P26599	Polypyrimidine tract-binding protein 1 OS=Homo sapiens OX=9606 GN=PTBP1 PE=1 SV=1	FALSE	TRUE	20.339	9	9	6	531	57.2	High	High	High	High	High	High		0.998	1.185	0.732	0.971667	0.227645	23.4283	133.3	133.1	119	141.1	184	134.6	7	7	7	7	7	7	23.75
High	Q14240	Eukaryotic initiation factor 4A-II OS=Homo sapiens OX=9606 GN=EIF4A2 PE=1 SV=2	FALSE	TRUE	21.1302	9	13	1	407	46.4	High	High	High	High	High	High		0.97	1.22	0.754	0.981333	0.233207	23.7643	34.4	33.4	28.3	34.5	39.8	30	1	1	1	1	1	1	40.78
High	O00268	Transcription initiation factor TFIID subunit 4 OS=Homo sapiens OX=9606 GN=TAF4 PE=1 SV=2	FALSE	TRUE	7.92627	9	13	9	1085	110	High	High	High	High	High	High		0.862	1.706	0.707	1.09167	0.537643	49.2498	94.8	81.7	55.8	95.2	120.2	85	6	6	6	6	6	6	35.38
High	O14647	Chromodomain-helicase-DNA-binding protein 2 OS=Homo sapiens OX=9606 GN=CHD2 PE=1 SV=2	FALSE	TRUE	5.52516	9	10	4	1828	211.2	High	High	High	High	High	High		1.254	1.301	1.218	1.25767	0.0416213	3.30941	12.5	15.7	10.2	13.3	11.9	14.5	1	1	1	1	1	1	20.73
High	A2RUM7	Ribosomal protein L5, isoform CRA_c OS=Homo sapiens OX=9606 GN=RPL5 PE=2 SV=1	FALSE	TRUE	26.2626	8	13	1	297	34.3	High	High	High	High	High	High		0.722	0.748	0.634	0.701333	0.0597439	8.51862	30.8	22.3	31	23.2	35.2	22.3	1	1	1	1	1	1	33.85
High	Q12888	TP53-binding protein 1 OS=Homo sapiens OX=9606 GN=TP53BP1 PE=1 SV=2	FALSE	TRUE	4.56389	8	9	8	1972	213.4	High	High	High	High	High	High		0.273	1.283	0.55	0.702	0.521875	74.3411	170.9	46.6	44.5	57.1	81.4	44.8	4	4	4	4	4	4	21.01
High	P84243	Histone H3.3 OS=Homo sapiens OX=9606 GN=H3F3A PE=1 SV=2	FALSE	TRUE	35.2941	8	16	1	136	15.3	Medium	Medium	Medium	Medium	Medium	Medium		0.79	0.965	0.457	0.737333	0.258063	34.9995	30.8	24.4	22.9	22.1	43.5	19.9	1	1	1	1	1	1	23.87
High	E5KLL9	Mitochondrial dynamin-like 120 kDa protein OS=Homo sapiens OX=9606 PE=3 SV=1	FALSE	TRUE	8.07882	8	8	8	1015	117.7	High	High	High	High	High	High		0.862	0.999	0.463	0.774667	0.278468	35.9468	56.5	48.7	44.7	44.7	81.4	37.7	3	3	3	3	3	3	23.74
High	Q6P1N1	PPM2C protein (Fragment) OS=Homo sapiens OX=9606 GN=PPM2C PE=2 SV=1	FALSE	TRUE	16.3366	8	8	8	606	68.4	High	High	High	High	High	High		0.843	1.016	0.489	0.782667	0.26863	34.3225	82.3	69.4	75.7	76.9	155.5	76	4	4	4	4	4	4	16.42
High	P06748	Nucleophosmin OS=Homo sapiens OX=9606 GN=NPM1 PE=1 SV=2	FALSE	TRUE	27.2109	8	8	8	294	32.6	High	High	High	High	High	High		0.977	0.777	0.596	0.783333	0.190579	24.3292	206.9	202.1	261.1	202.8	319.6	190.6	7	7	7	7	7	7	15.28
High	Q9UEW8	STE20/SPS1-related proline-alanine-rich protein kinase OS=Homo sapiens OX=9606 GN=STK39 PE=1 SV=3	FALSE	TRUE	14.4954	8	11	6	545	59.4	High	High	High	High	High	High		0.863	0.988	0.509	0.786667	0.248456	31.5834	205.3	177.1	168.5	166.5	277.9	141.5	6	6	6	6	6	6	27.35
High	P52597	Heterogeneous nuclear ribonucleoprotein F OS=Homo sapiens OX=9606 GN=HNRNPF PE=1 SV=3	FALSE	TRUE	26.2651	8	13	6	415	45.6	High	High	High	High	High	High		0.793	1.027	0.56	0.793333	0.2335	29.4328	189.9	150.6	155.1	159.2	247.2	138.5	5	5	5	5	5	5	47.39
High	Q9UNX4	WD repeat-containing protein 3 OS=Homo sapiens OX=9606 GN=WDR3 PE=1 SV=1	FALSE	TRUE	8.27147	8	8	8	943	106	High	High	High	High	High	High		0.808	0.95	0.645	0.801	0.15262	19.0537	126.1	101.8	107.7	102.3	163	105.2	6	6	6	6	6	6	18.58
High	G8JLB6	Heterogeneous nuclear ribonucleoprotein H OS=Homo sapiens OX=9606 GN=HNRNPH1 PE=1 SV=1	FALSE	TRUE	22.2458	8	12	5	472	51.2	High	High	High	High	High	High		0.804	1.028	0.578	0.803333	0.225001	28.0084	160.5	129.1	135.7	139.5	208	120.3	5	5	5	5	5	5	40.24
High	Q9UHD8	Septin-9 OS=Homo sapiens OX=9606 GN=SEPT9 PE=1 SV=2	FALSE	TRUE	13.1399	8	9	8	586	65.4	High	High	High	High	High	High		0.795	1.049	0.569	0.804333	0.240136	29.8553	171.8	136.7	139.4	146.2	227.4	129.3	7	7	7	7	7	7	20.68
High	E7ESC6	Exportin-7 OS=Homo sapiens OX=9606 GN=XPO7 PE=1 SV=1	FALSE	TRUE	8.54779	8	8	8	1088	124	High	High	High	High	High	High		0.942	0.925	0.55	0.805667	0.221577	27.5023	46.1	43.5	41.3	38.2	59.1	32.5	3	3	3	3	3	3	19.61
High	A6NMQ1	DNA polymerase OS=Homo sapiens OX=9606 GN=POLA1 PE=1 SV=1	FALSE	TRUE	5.58583	8	9	7	1468	166.4	High	High	High	High	High	High		0.775	1.1	0.555	0.81	0.274181	33.8495	124.3	96.3	97.6	107.4	157.9	87.6	5	5	5	5	5	5	17.08
High	O43175	D-3-phosphoglycerate dehydrogenase OS=Homo sapiens OX=9606 GN=PHGDH PE=1 SV=4	FALSE	TRUE	15.7598	8	10	8	533	56.6	High	High	High	High	High	High		0.909	0.878	0.644	0.810333	0.14488	17.8791	121.7	110.6	109.4	96.1	150.1	96.6	6	6	6	6	6	6	24.38
High	P12004	Proliferating cell nuclear antigen OS=Homo sapiens OX=9606 GN=PCNA PE=1 SV=1	FALSE	TRUE	29.5019	8	9	8	261	28.8	High	High	High	High	High	High		0.925	0.883	0.627	0.811667	0.161299	19.8726	239.7	221.7	231.3	204.3	325.3	204	7	7	7	7	7	7	20.14
High	A0A024QZ45	BRCA1 interacting protein C-terminal helicase 1, isoform CRA_a OS=Homo sapiens OX=9606 GN=BRIP1 PE=4 SV=1	FALSE	TRUE	6.32506	8	8	8	1249	140.8	High	High	High	High	High	High		0.635	1.188	0.618	0.813667	0.324294	39.8558	105.3	66.9	76.4	90.8	122.1	75.4	4	4	4	4	4	4	17.66
High	Q4LE58	eIF4G1 variant protein (Fragment) OS=Homo sapiens OX=9606 GN=EIF4G1 variant protein PE=2 SV=1	FALSE	TRUE	5.66502	8	8	8	1624	178	High	High	High	High	High	High		0.807	0.989	0.65	0.815333	0.169654	20.8079	75.1	60.6	63.9	63.2	90.3	58.7	4	4	4	4	4	4	15.43
High	A1L0T0	Acetolactate synthase-like protein OS=Homo sapiens OX=9606 GN=ILVBL PE=1 SV=2	FALSE	TRUE	18.1962	8	8	8	632	67.8	High	High	High	High	High	High		0.666	1.47	0.327	0.821	0.587053	71.5046	14.7	9.8	8.5	12.5	19.6	6.4	1	1	1	1	1	1	23.39
High	Q59GW5	Tripartite motif-containing 25 variant (Fragment) OS=Homo sapiens OX=9606 PE=2 SV=1	FALSE	TRUE	12.2671	8	8	8	644	72.2	High	High	High	High	High	High		0.813	1.099	0.556	0.822667	0.271629	33.0181	150	122	126.5	139.1	207.4	115.4	7	7	7	7	7	7	24.29
High	A0A087WZN1	Isocitrate dehydrogenase [NAD] subunit, mitochondrial OS=Homo sapiens OX=9606 GN=IDH3B PE=1 SV=1	FALSE	TRUE	21.1886	8	9	8	387	42.4	High	High	High	High	High	High		0.855	1.037	0.579	0.823667	0.230602	27.997	166.8	142.6	121.5	126	215.1	124.6	4	4	4	4	4	4	24.38
High	B3KNC3	cDNA FLJ14222 fis, clone NT2RP3003992, highly similar to Nucleolar complex protein 2 homolog OS=Homo sapiens OX=9606 PE=2 SV=1	FALSE	TRUE	9.61282	8	9	8	749	84.9	High	High	High	High	High	High		0.896	1.023	0.572	0.830333	0.23256	28.0081	144.8	129.7	130.1	133.1	186.6	106.7	5	5	5	5	5	5	18.72
High	P19525	Interferon-induced, double-stranded RNA-activated protein kinase OS=Homo sapiens OX=9606 GN=EIF2AK2 PE=1 SV=2	FALSE	TRUE	18.6933	8	11	8	551	62.1	High	High	High	High	High	High		0.927	0.996	0.576	0.833	0.225227	27.038	188	174.4	161.7	161.1	263.2	151.7	6	6	6	6	6	6	32.31
High	Q8IY37	Probable ATP-dependent RNA helicase DHX37 OS=Homo sapiens OX=9606 GN=DHX37 PE=1 SV=1	FALSE	TRUE	7.9516	8	9	8	1157	129.5	High	High	High	High	High	High		0.891	1.096	0.535	0.840667	0.283867	33.7669	146.7	130.8	119.7	131.1	222.2	118.9	4	4	4	4	4	4	22.33
High	A8K2M0	Proteasome (Prosome, macropain) 26S subunit, ATPase, 4, isoform CRA_b OS=Homo sapiens OX=9606 GN=PSMC4 PE=2 SV=1	FALSE	TRUE	21.2919	8	9	8	418	47.3	High	High	High	High	High	High		0.911	1.053	0.569	0.844333	0.248792	29.4661	127	115.6	110.8	116.6	174.3	99.2	5	5	5	5	5	5	20.06
High	Q02880	DNA topoisomerase 2-beta OS=Homo sapiens OX=9606 GN=TOP2B PE=1 SV=3	FALSE	TRUE	4.98155	8	9	2	1626	183.2	High	High	High	High	High	High		0.854	1.059	0.629	0.847333	0.215078	25.3829	39.8	34	35.1	37.2	53.1	33.4	2	2	2	2	2	2	19.34
High	P23258	Tubulin gamma-1 chain OS=Homo sapiens OX=9606 GN=TUBG1 PE=1 SV=2	FALSE	TRUE	22.6164	8	9	8	451	51.1	High	High	High	High	High	High		0.981	0.96	0.613	0.851333	0.20667	24.276	119.2	117	104.3	100.2	157	96.3	6	6	6	6	6	6	30.03
High	O43148	mRNA cap guanine-N7 methyltransferase OS=Homo sapiens OX=9606 GN=RNMT PE=1 SV=1	FALSE	TRUE	14.916	8	8	8	476	54.8	High	High	High	High	High	High		0.82	1.097	0.647	0.854667	0.226994	26.5594	185.9	152.4	149.5	164	219.7	142.2	5	5	5	5	5	5	14.24
High	A0A024R9D3	Ribosomal protein L30, isoform CRA_b OS=Homo sapiens OX=9606 GN=RPL30 PE=3 SV=1	FALSE	TRUE	76.5217	8	11	8	115	12.8	High	High	High	High	High	High		0.919	0.96	0.687	0.855333	0.147215	17.2114	193.5	177.8	179.8	172.7	239.1	164.3	6	6	6	6	6	6	28.34
High	Q9UKN8	General transcription factor 3C polypeptide 4 OS=Homo sapiens OX=9606 GN=GTF3C4 PE=1 SV=2	FALSE	TRUE	12.7737	8	9	8	822	91.9	High	High	High	High	High	High		0.918	1.177	0.472	0.855667	0.356609	41.6762	80.3	73.7	63.5	74.7	111	52.4	4	4	4	4	4	4	18.64
High	F8VU11	PRP40 pre-mRNA processing factor 40 homolog B (Yeast), isoform CRA_a OS=Homo sapiens OX=9606 GN=PRPF40B PE=1 SV=2	FALSE	TRUE	9.97758	8	9	6	892	101.3	High	High	High	High	High	High		0.756	1.259	0.554	0.856333	0.363051	42.396	122.8	92.8	100.7	126.8	173.7	96.2	5	5	5	5	5	5	19.99
High	Q15717	ELAV-like protein 1 OS=Homo sapiens OX=9606 GN=ELAVL1 PE=1 SV=2	FALSE	TRUE	28.2209	8	8	8	326	36.1	High	High	High	High	High	High		0.954	1.04	0.62	0.871333	0.221868	25.463	116	110.6	111.9	116.4	156.2	96.8	5	5	5	5	5	5	25.14
High	Q9UKJ3	G patch domain-containing protein 8 OS=Homo sapiens OX=9606 GN=GPATCH8 PE=1 SV=2	FALSE	TRUE	7.05726	8	8	8	1502	164.1	High	High	High	High	High	High		0.793	1.203	0.626	0.874	0.296906	33.9709	98.3	77.9	74.7	89.8	112.8	70.6	4	4	4	4	4	4	23.99
High	P62750	60S ribosomal protein L23a OS=Homo sapiens OX=9606 GN=RPL23A PE=1 SV=1	FALSE	TRUE	37.8205	8	11	8	156	17.7	High	High	High	High	High	High		0.935	1.035	0.657	0.875667	0.19586	22.367	423.6	396.1	387.1	400.6	549.7	361.3	6	6	6	6	6	6	24.09
High	P50747	Biotin--protein ligase OS=Homo sapiens OX=9606 GN=HLCS PE=1 SV=1	FALSE	TRUE	11.4325	8	8	8	726	80.7	High	High	High	High	High	High		0.851	1.162	0.622	0.878333	0.271036	30.858	174.9	148.9	152.5	177.2	252.4	157	4	4	4	4	4	4	17.02
High	A8K8T1	cDNA FLJ75800, highly similar to Homo sapiens NGFI-A binding protein 1 (EGR1 binding protein 1) (NAB1), mRNA OS=Homo sapiens OX=9606 PE=2 SV=1	FALSE	TRUE	16.2218	8	9	8	487	54.3	High	High	High	High	High	High		0.859	1.273	0.551	0.894333	0.362295	40.51	116.3	99.9	87.8	111.8	158.3	87.2	5	5	5	5	5	5	23.18
High	P38159	RNA-binding motif protein, X chromosome OS=Homo sapiens OX=9606 GN=RBMX PE=1 SV=3	FALSE	TRUE	19.6931	8	9	8	391	42.3	High	High	High	High	High	High		0.994	1.042	0.662	0.899333	0.206933	23.0096	100.1	99.5	89.1	92.8	152.8	101.2	5	5	5	5	5	5	21.23
High	P26196	Probable ATP-dependent RNA helicase DDX6 OS=Homo sapiens OX=9606 GN=DDX6 PE=1 SV=2	FALSE	TRUE	21.118	8	9	8	483	54.4	High	High	High	High	High	High		0.936	1.086	0.691	0.904333	0.199395	22.0488	140.7	131.7	119.5	129.8	159	109.9	6	6	6	6	6	6	25.7
High	A0A024R2Q4	Ribosomal protein L15 OS=Homo sapiens OX=9606 GN=RPL15 PE=3 SV=1	FALSE	TRUE	38.7255	8	11	8	204	24.1	High	High	High	High	High	High		0.912	1.111	0.694	0.905667	0.208572	23.0297	322	293.8	270.5	300.5	443.8	308.1	8	8	8	8	8	8	26.49
High	P46779	60S ribosomal protein L28 OS=Homo sapiens OX=9606 GN=RPL28 PE=1 SV=3	FALSE	TRUE	52.5547	8	11	8	137	15.7	High	High	High	High	High	High	Met-loss+Acetyl [N-Term]	0.936	0.986	0.805	0.909	0.0934719	10.2829	394.7	369.5	335.6	331	459	369.7	8	8	8	8	8	8	19.71
High	M0QYS1	60S ribosomal protein L13a (Fragment) OS=Homo sapiens OX=9606 GN=RPL13A PE=1 SV=2	FALSE	TRUE	31.4286	8	14	8	210	24.2	High	High	High	High	High	High		0.974	1.022	0.748	0.914667	0.146319	15.997	520.2	506.5	479.6	490	667.9	499.7	7	7	7	7	7	7	34.33
High	Q5VUA4	Zinc finger protein 318 OS=Homo sapiens OX=9606 GN=ZNF318 PE=1 SV=2	FALSE	TRUE	3.90522	8	9	8	2279	251	High	High	High	High	High	High		0.851	1.281	0.615	0.915667	0.337676	36.8777	123	104.6	97.5	124.9	153.2	94.2	5	5	5	5	5	5	26.83
High	Q9UNF1	Melanoma-associated antigen D2 OS=Homo sapiens OX=9606 GN=MAGED2 PE=1 SV=2	FALSE	TRUE	10.231	8	8	7	606	64.9	High	High	High	High	High	High		0.883	1.215	0.668	0.922	0.275578	29.8891	132.5	117	110	133.7	178	118.9	6	6	6	6	6	6	19.5
High	O15371	Eukaryotic translation initiation factor 3 subunit D OS=Homo sapiens OX=9606 GN=EIF3D PE=1 SV=1	FALSE	TRUE	18.2482	8	9	8	548	63.9	High	High	High	High	High	High		0.854	1.209	0.742	0.935	0.243809	26.0759	173.2	147.8	137.6	166.4	196.4	145.7	6	6	6	6	6	6	25.45
High	B4DWX3	Importin subunit alpha OS=Homo sapiens OX=9606 PE=2 SV=1	FALSE	TRUE	18.6691	8	10	8	541	60.5	High	High	High	High	High	High		0.95	1.191	0.669	0.936667	0.261255	27.892	131.8	125.2	104.9	125	146.6	98.1	5	5	5	5	5	5	25.68
High	P22629	Streptavidin OS=Streptomyces avidinii PE=1 SV=1	TRUE	FALSE	43.1694	8	1127	8	183	18.8	High	High	High	High	High	High		0.951	1.181	0.701	0.944333	0.240069	25.4221	9399.8	8936.5	8738.3	10320.8	13335.9	9345.8	12	12	12	12	12	12	3595.25
High	P00761	Trypsin OS=Sus scrofa PE=1 SV=1	TRUE	FALSE	45.4545	8	76	8	231	24.4	High	High	High	High	High	High		1.077	0.969	0.794	0.946667	0.142816	15.0862	753.9	812.3	733.7	711.3	906.1	719.3	10	10	10	10	10	10	208.18
High	O94916	Nuclear factor of activated T-cells 5 OS=Homo sapiens OX=9606 GN=NFAT5 PE=1 SV=1	FALSE	TRUE	6.07446	8	8	8	1531	165.7	High	High	High	High	High	High		0.882	1.403	0.557	0.947333	0.426767	45.0493	112.7	99.4	85.4	119.8	159.2	88.6	5	5	5	5	5	5	20.69
High	Q59GX9	Ribosomal protein L5 variant (Fragment) OS=Homo sapiens OX=9606 PE=2 SV=1	FALSE	TRUE	25.4125	8	12	1	303	35.2	High	High	High	High	High	High		1.08	0.982	0.784	0.948667	0.150789	15.8948	129.9	140.4	133.8	131.3	172.2	135	6	6	6	6	6	6	29.28
High	B2R4C0	60S ribosomal protein L18a OS=Homo sapiens OX=9606 PE=2 SV=1	FALSE	TRUE	42.0455	8	15	8	176	20.7	High	High	High	High	High	High		1.031	1.137	0.689	0.952333	0.234131	24.585	801.9	826.7	770.7	876.3	1090.1	750.7	9	9	9	9	9	9	37.04
High	K7ER00	Phenylalanine--tRNA ligase alpha subunit OS=Homo sapiens OX=9606 GN=FARSA PE=1 SV=1	FALSE	TRUE	14.5985	8	10	8	548	62.4	High	High	High	High	High	High		0.992	1.015	0.871	0.959333	0.0773585	8.06377	123.7	122.7	121.2	123	145.3	126.5	6	6	6	6	6	6	28.15
High	Q15008	26S proteasome non-ATPase regulatory subunit 6 OS=Homo sapiens OX=9606 GN=PSMD6 PE=1 SV=1	FALSE	TRUE	22.365	8	8	8	389	45.5	High	High	High	High	High	High		0.979	0.99	0.93	0.966333	0.0319427	3.30555	41.5	40.6	33.1	32.8	43.1	40.1	2	2	2	2	2	2	23.02
High	Q9GZU8	Protein FAM192A OS=Homo sapiens OX=9606 GN=FAM192A PE=1 SV=1	FALSE	TRUE	28.3465	8	8	8	254	28.9	High	High	High	High	High	High		0.938	1.307	0.654	0.966333	0.327421	33.8828	118.5	111.2	88	115.1	148.7	97.3	5	5	5	5	5	5	17.78
High	B2R9L6	cDNA, FLJ94450, highly similar to Homo sapiens cyclin-dependent kinase 9 (CDC2-related kinase) (CDK9), mRNA OS=Homo sapiens OX=9606 PE=2 SV=1	FALSE	TRUE	20.1613	8	11	5	372	42.7	High	High	High	High	High	High		1.246	1.206	0.516	0.989333	0.410406	41.4831	10.9	13.6	10	12.1	18.8	9.7	1	1	1	1	1	1	27.84
High	Q9UHV7	Mediator of RNA polymerase II transcription subunit 13 OS=Homo sapiens OX=9606 GN=MED13 PE=1 SV=3	FALSE	TRUE	4.09384	8	8	8	2174	239.1	High	High	High	High	High	High		0.703	1.515	0.753	0.990333	0.455062	45.9504	94	66.1	79.2	120	113.2	85.2	5	5	5	5	5	5	19.93
High	A0A024R394	Cysteine and histidine-rich domain (CHORD)-containing 1, isoform CRA_c OS=Homo sapiens OX=9606 GN=CHORDC1 PE=4 SV=1	FALSE	TRUE	33.7349	8	9	8	332	37.5	High	High	High	High	High	High		0.961	1.302	0.738	1.00033	0.28405	28.3955	197.2	189.4	161.8	210.7	227.2	167.7	6	6	6	6	6	6	25.44
High	B3KTS5	cDNA FLJ38670 fis, clone HSYRA2000190, highly similar to Voltage-dependent anion-selective channel protein 1 OS=Homo sapiens OX=9606 PE=2 SV=1	FALSE	TRUE	38.1625	8	10	6	283	30.7	High	High	High	High	High	High		1.07	1.046	1.004	1.04	0.0334066	3.21217	85.3	91.3	84	87.9	96.3	96.7	3	3	3	3	3	3	32.8
High	P42766	60S ribosomal protein L35 OS=Homo sapiens OX=9606 GN=RPL35 PE=1 SV=2	FALSE	TRUE	38.2114	8	11	6	123	14.5	High	High	High	High	High	High		1.186	1.246	0.772	1.068	0.258093	24.166	314.8	373.3	298.2	371.5	448.5	346.1	7	7	7	7	7	7	24.67
High	E5KT65	DNA-directed RNA polymerase subunit RPABC1 OS=Homo sapiens OX=9606 PE=3 SV=1	FALSE	TRUE	47.619	8	11	8	210	24.5	High	High	High	High	High	High		1.271	1.435	0.65	1.11867	0.414078	37.0153	174.4	221.7	121.8	174.7	234.4	152.4	7	7	7	7	7	7	30.37
High	Q8IV32	Coiled-coil domain-containing protein 71 OS=Homo sapiens OX=9606 GN=CCDC71 PE=1 SV=3	FALSE	TRUE	19.9143	8	11	8	467	49.6	High	High	High	High	High	High		0.893	1.576	1.038	1.169	0.359851	30.7828	258.7	231.1	193.6	305.1	279.2	289.7	7	7	7	7	7	7	21.83
High	Q9D646	Keratin, type I cuticular Ha4 OS=Mus musculus GN=Krt34 PE=2 SV=1	TRUE	TRUE	19.898	8	11	1	392	44.5	High	Not Found	Not Found	Not Found	Not Found	High		0.01		100	50.005	70.7036	141.393	192.6					1.5	1					1	27.27
High	Q14525	Keratin, type I cuticular Ha3-II OS=Homo sapiens OX=9606 GN=KRT33B PE=1 SV=3	TRUE	TRUE	18.8119	8	12	1	404	46.2	High	Not Found	High	Not Found	Not Found	Not Found					#DIV/0!	#DIV/0!	#DIV/0!													29.03
High	A0A090N8Y2	Protein disulfide-isomerase A4 OS=Homo sapiens OX=9606 GN=ERP70 PE=2 SV=1	FALSE	TRUE	12.8682	7	8	7	645	72.9	High	High	High	High	High	High		0.781	0.894	0.53	0.735	0.186309	25.3481	83.4	65.2	75.2	67.2	120.3	63.8	5	5	5	5	5	5	13.24
High	P29401	Transketolase OS=Homo sapiens OX=9606 GN=TKT PE=1 SV=3	FALSE	TRUE	14.9278	7	8	7	623	67.8	High	High	High	High	High	High		0.789	0.849	0.58	0.739333	0.14121	19.0997	99.5	78.4	101.5	86.1	134.9	78.2	4	4	4	4	4	4	19.38
High	P31689	DnaJ homolog subfamily A member 1 OS=Homo sapiens OX=9606 GN=DNAJA1 PE=1 SV=2	FALSE	TRUE	18.3879	7	8	5	397	44.8	High	High	High	High	High	High		0.716	0.951	0.567	0.744667	0.193598	25.998	225.9	161.8	187.3	178.1	273.4	155	5	5	5	5	5	5	18.08
High	P58107	Epiplakin OS=Homo sapiens OX=9606 GN=EPPK1 PE=1 SV=3	FALSE	TRUE	9.49292	7	8	4	5088	555.3	High	High	High	High	High	High		0.783	0.837	0.623	0.747667	0.111289	14.8849	90.3	70.7	73.7	61.7	113	70.4	3	3	3	3	3	3	22.44
High	A4D2Q0	Unc-84 homolog A (C. elegans) OS=Homo sapiens OX=9606 GN=UNC84A PE=4 SV=1	FALSE	TRUE	6.87885	7	7	7	974	108.4	High	High	High	High	High	High		0.706	0.971	0.585	0.754	0.197426	26.1838	134.4	95	100.8	97.9	145.7	85.2	4	4	4	4	4	4	17.26
High	B4DR61	cDNA FLJ59739, highly similar to Protein transport protein Sec61 subunit alpha isoform 1 OS=Homo sapiens OX=9606 GN=SEC61A1 PE=1 SV=1	FALSE	TRUE	13.4855	7	10	7	482	52.9	High	High	High	High	High	High		0.811	0.924	0.53	0.755	0.202882	26.8718	325.8	264.2	274.7	253.8	422.3	224	7	7	7	7	7	7	25.58
High	A8K651	cDNA FLJ75700, highly similar to Homo sapiens complement component 1, q subcomponent binding protein (C1QBP), nuclear gene encoding mitochondrial protein, mRNA OS=Homo sapiens OX=9606 PE=2 SV=1	FALSE	TRUE	33.6879	7	14	7	282	31.4	High	High	High	High	High	High		0.77	1.178	0.338	0.762	0.420057	55.1256	240.8	185.5	168.4	198.4	345.6	116.7	5	5	5	5	5	5	51.48
High	A0A024RAD5	Dolichyl-diphosphooligosaccharide--protein glycosyltransferase 48 kDa subunit OS=Homo sapiens OX=9606 GN=DDOST PE=3 SV=1	FALSE	TRUE	16.886	7	10	7	456	50.7	High	High	High	High	High	High		0.843	0.969	0.491	0.767667	0.247744	32.2724	72.5	61.2	53.1	51.5	93.8	46.1	3	3	3	3	3	3	29.2
High	Q5BKZ1	DBIRD complex subunit ZNF326 OS=Homo sapiens OX=9606 GN=ZNF326 PE=1 SV=2	FALSE	TRUE	12.3711	7	8	7	582	65.6	High	High	High	High	High	High		0.763	1.039	0.512	0.771333	0.263599	34.1744	120.1	91.6	88.1	91.6	136.6	70	4	4	4	4	4	4	20.86
High	Q9P275	Ubiquitin carboxyl-terminal hydrolase 36 OS=Homo sapiens OX=9606 GN=USP36 PE=1 SV=4	FALSE	TRUE	7.30187	7	7	7	1123	122.8	High	High	High	High	High	High		0.836	1.008	0.473	0.772333	0.273123	35.3634	44.5	37.2	34.7	35	60.3	28.5	3	3	3	3	3	3	13.29
High	P52434	DNA-directed RNA polymerases I, II, and III subunit RPABC3 OS=Homo sapiens OX=9606 GN=POLR2H PE=1 SV=4	FALSE	TRUE	59.3333	7	32	7	150	17.1	High	High	High	High	High	High		0.821	1.055	0.456	0.777333	0.301878	38.8351	843.1	692.3	649.8	685.8	1163.6	530.4	7	7	7	7	7	7	84.12
High	Q99567	Nuclear pore complex protein Nup88 OS=Homo sapiens OX=9606 GN=NUP88 PE=1 SV=2	FALSE	TRUE	10.3914	7	8	7	741	83.5	High	High	High	High	High	High		0.803	0.98	0.55	0.777667	0.216116	27.7904	173.6	139.3	152.7	149.7	248.2	136.4	5	5	5	5	5	5	16.72
High	A0A024R8S5	Protein disulfide-isomerase OS=Homo sapiens OX=9606 GN=P4HB PE=2 SV=1	FALSE	TRUE	13.189	7	8	7	508	57.1	High	High	High	High	High	High		0.902	0.638	0.795	0.778333	0.132787	17.0604	131.5	118.6	198.4	126.6	180.7	143.7	4	4	4	4	4	4	20.37
High	P37802	Transgelin-2 OS=Homo sapiens OX=9606 GN=TAGLN2 PE=1 SV=3	FALSE	TRUE	36.6834	7	11	7	199	22.4	High	High	High	High	High	High		0.747	1.117	0.508	0.790667	0.306839	38.8077	183.2	136.8	137.1	153.2	224.8	114.3	4	4	4	4	4	4	26.66
High	O75146	Huntingtin-interacting protein 1-related protein OS=Homo sapiens OX=9606 GN=HIP1R PE=1 SV=2	FALSE	TRUE	6.27341	7	7	7	1068	119.3	High	High	High	High	High	High		0.806	0.921	0.648	0.791667	0.137063	17.3133	199.2	160.6	161.9	149.2	227.5	147.5	6	6	6	6	6	6	11.77
High	B3KTL8	cDNA FLJ38476 fis, clone FEBRA2022504, highly similar to YTH domain protein 1 OS=Homo sapiens OX=9606 PE=2 SV=1	FALSE	TRUE	13.9535	7	7	5	559	60.8	High	High	High	High	High	High		0.86	0.929	0.59	0.793	0.179156	22.5922	263.6	226.7	236	219.2	348.3	205.5	7	7	7	7	7	7	14.7
High	P35250	Replication factor C subunit 2 OS=Homo sapiens OX=9606 GN=RFC2 PE=1 SV=3	FALSE	TRUE	22.3164	7	7	7	354	39.1	High	High	High	High	High	High		0.929	0.949	0.502	0.793333	0.2525	31.8278	50.4	46.8	42.4	40.2	65.3	32.8	1	1	1	1	1	1	16.69
High	A0A024QZE9	Uncharacterized protein OS=Homo sapiens OX=9606 GN=FLJ20643 PE=4 SV=1	FALSE	TRUE	39.3103	7	11	1	290	32.4	High	High	High	High	High	High		0.721	1.17	0.493	0.794667	0.344459	43.3464	120.6	87	84.1	98.4	158.2	78	4	4	4	4	4	4	31.99
High	Q7L0Y3	tRNA methyltransferase 10 homolog C OS=Homo sapiens OX=9606 GN=TRMT10C PE=1 SV=2	FALSE	TRUE	23.0769	7	8	7	403	47.3	High	High	High	High	High	High		0.844	0.957	0.584	0.795	0.191267	24.0587	135.4	114.3	107	102.4	171	99.9	6	6	6	6	6	6	22.21
High	F5H070	Lysine-specific demethylase 3A OS=Homo sapiens OX=9606 GN=KDM3A PE=1 SV=2	FALSE	TRUE	5.1997	7	7	5	1327	148	High	High	High	High	High	High		0.789	1.048	0.556	0.797667	0.246114	30.8543	47.4	37.3	37.6	39.4	61.7	34.3	3	3	3	3	3	3	15.14
High	P26641	Elongation factor 1-gamma OS=Homo sapiens OX=9606 GN=EEF1G PE=1 SV=3	FALSE	TRUE	16.2471	7	9	7	437	50.1	High	High	High	High	High	High		0.914	0.607	0.886	0.802333	0.169742	21.156	232.1	212.2	333.9	202.6	307.7	272.5	5	5	5	5	5	5	19.76
High	A0A024R8N6	Thymidine kinase OS=Homo sapiens OX=9606 GN=TK1 PE=3 SV=1	FALSE	TRUE	29.3478	7	7	7	276	29.9	High	High	High	High	High	High		0.846	1.012	0.558	0.805333	0.229716	28.5243	144.1	121.9	121.2	122.6	175	97.7	5	5	5	5	5	5	19.04
High	Q9Y446	Plakophilin-3 OS=Homo sapiens OX=9606 GN=PKP3 PE=1 SV=1	FALSE	TRUE	11.4178	7	9	7	797	87	High	High	High	High	High	High		0.847	0.965	0.608	0.806667	0.181885	22.5478	65.4	55.4	50.6	48.8	82.5	50.2	3	3	3	3	3	3	18.64
High	P62979	Ubiquitin-40S ribosomal protein S27a OS=Homo sapiens GN=RPS27A PE=1 SV=2	TRUE	TRUE	39.1026	7	27	7	156	18	High	High	High	High	High	High		0.819	0.998	0.611	0.809333	0.193681	23.9309	707.5	579.8	578.2	576.9	866	529.5	6	6	6	6	6	6	65
High	A0A024R4E5	High density lipoprotein binding protein (Vigilin), isoform CRA_a OS=Homo sapiens OX=9606 GN=HDLBP PE=1 SV=1	FALSE	TRUE	4.73186	7	7	6	1268	141.4	High	High	High	High	High	High		0.77	1.084	0.574	0.809333	0.257265	31.7873	113.1	87.1	85	92.1	145.3	83.4	3	3	3	3	3	3	15.5
High	Q9NU22	Midasin OS=Homo sapiens OX=9606 GN=MDN1 PE=1 SV=2	FALSE	TRUE	1.53681	7	7	7	5596	632.4	High	High	High	High	High	High		0.862	1.071	0.516	0.816333	0.280304	34.337	46.4	40	42.1	45.1	73.6	38	3	3	3	3	3	3	14.81
High	A0A140VJS9	Serine/threonine-protein phosphatase OS=Homo sapiens OX=9606 PE=2 SV=1	FALSE	TRUE	20.8211	7	8	1	341	38.6	High	High	High	High	High	High		0.857	0.996	0.599	0.817333	0.201451	24.6473	82.7	70.9	75.5	75.2	113.1	67.7	4	4	4	4	4	4	15.58
High	A0A024QZR3	Protein pelota homolog OS=Homo sapiens OX=9606 GN=hCG_2002731 PE=3 SV=1	FALSE	TRUE	16.6234	7	7	7	385	43.4	High	High	High	High	High	High		0.771	1.096	0.587	0.818	0.257734	31.5079	82.5	63.6	58.8	64.4	108.3	63.6	4	4	4	4	4	4	19.31
High	P49750	YLP motif-containing protein 1 OS=Homo sapiens OX=9606 GN=YLPM1 PE=1 SV=4	FALSE	TRUE	3.44828	7	7	7	2146	241.5	High	High	High	High	High	High		0.793	1.088	0.576	0.819	0.256988	31.3783	96.1	76.2	76.8	83.5	136.8	78.8	5	5	5	5	5	5	17.18
High	O60701	UDP-glucose 6-dehydrogenase OS=Homo sapiens OX=9606 GN=UGDH PE=1 SV=1	FALSE	TRUE	17.8138	7	8	7	494	55	High	High	High	High	High	High		0.882	0.951	0.641	0.824667	0.162759	19.7363	118.5	104.6	103.1	98.1	158.1	101.3	3	3	3	3	3	3	22.35
High	Q5VZL5	Zinc finger MYM-type protein 4 OS=Homo sapiens OX=9606 GN=ZMYM4 PE=1 SV=1	FALSE	TRUE	4.65116	7	7	7	1548	172.7	High	High	High	High	High	High		0.846	0.927	0.703	0.825333	0.113421	13.7425	84.7	71.6	77.2	71.5	102	71.7	4	4	4	4	4	4	11.24
High	A0A2R8YG02	DNA mismatch repair protein OS=Homo sapiens OX=9606 GN=MSH2 PE=1 SV=1	FALSE	TRUE	7.67591	7	7	7	938	105	High	High	High	High	High	High		0.838	1.008	0.639	0.828333	0.18469	22.2966	42.5	35.6	34.7	35	56.8	36.3	3	3	3	3	3	3	10.92
High	A0A024RDW4	Uncharacterized protein OS=Homo sapiens OX=9606 GN=FLJ10154 PE=4 SV=1	FALSE	TRUE	16.1172	7	8	7	273	33.2	High	High	High	High	High	High		0.716	1.092	0.677	0.828333	0.229173	27.6668	199.2	142.7	129.4	141.3	208.3	141.1	6	6	6	6	6	6	18.36
High	P36507	Dual specificity mitogen-activated protein kinase kinase 2 OS=Homo sapiens OX=9606 GN=MAP2K2 PE=1 SV=1	FALSE	TRUE	12.25	7	7	4	400	44.4	High	High	High	High	High	High		0.847	1.071	0.568	0.828667	0.252001	30.4104	245.6	207.9	187.6	201	324.8	184.4	7	7	7	7	7	7	16.1
High	O95478	Ribosome biogenesis protein NSA2 homolog OS=Homo sapiens OX=9606 GN=NSA2 PE=1 SV=1	FALSE	TRUE	30.7692	7	7	7	260	30	High	High	High	High	High	High		0.854	0.966	0.666	0.828667	0.151596	18.294	121.7	104	102.4	98.9	154	102.5	5	5	5	5	5	5	15.9
High	Q9Y266	Nuclear migration protein nudC OS=Homo sapiens OX=9606 GN=NUDC PE=1 SV=1	FALSE	TRUE	23.2628	7	8	7	331	38.2	High	High	High	High	High	High		0.861	1.055	0.572	0.829333	0.243052	29.3069	356.8	307.4	336.6	355	525.9	300.9	7	7	7	7	7	7	18.81
High	G3V5T9	Cyclin-dependent kinase 2, isoform CRA_c OS=Homo sapiens OX=9606 GN=CDK2 PE=1 SV=1	FALSE	TRUE	22.5434	7	7	4	346	39.2	High	High	High	High	High	High		0.859	1.058	0.577	0.831333	0.241691	29.0726	34.2	29.4	29.9	31.6	44.9	25.9	2	2	2	2	2	2	20.84
High	P42166	Lamina-associated polypeptide 2, isoform alpha OS=Homo sapiens OX=9606 GN=TMPO PE=1 SV=2	FALSE	TRUE	11.9597	7	8	7	694	75.4	High	High	High	High	High	High		0.907	0.957	0.638	0.834	0.171572	20.5722	63.6	57.7	65	62.2	92	58.7	4	4	4	4	4	4	22.07
High	S4R3S7	Acetyl-CoA carboxylase 2 (Fragment) OS=Homo sapiens OX=9606 GN=ACACB PE=1 SV=1	FALSE	TRUE	44.5161	7	29	2	155	17.6	High	High	High	High	High	High		0.822	1.074	0.624	0.84	0.225539	26.8499	145.7	119.7	126.6	135.9	196.4	122.5	2	2	2	2	2	2	75.07
High	V9GYM8	Rho guanine nucleotide exchange factor 2 OS=Homo sapiens OX=9606 GN=ARHGEF2 PE=1 SV=1	FALSE	TRUE	7.66246	7	7	7	1031	116	High	High	High	High	High	High		0.739	1.079	0.706	0.841333	0.206486	24.5427	83.3	61.6	59.9	64.6	89.9	63.5	4	4	4	4	4	4	15.72
High	P46063	ATP-dependent DNA helicase Q1 OS=Homo sapiens OX=9606 GN=RECQL PE=1 SV=3	FALSE	TRUE	9.55316	7	7	6	649	73.4	High	High	High	High	High	High		0.854	1.086	0.585	0.841667	0.250728	29.7894	60.7	51.8	53.7	58.3	78.8	46.1	4	4	4	4	4	4	17.48
High	A0A024RC37	Uncharacterized protein OS=Homo sapiens OX=9606 GN=P15RS PE=4 SV=1	FALSE	TRUE	25.9615	7	9	4	312	35.7	High	High	High	High	High	High		0.77	1.202	0.564	0.845333	0.325603	38.5177	147	113.1	109.5	131.6	193.2	109	3	3	3	3	3	3	17.84
High	P62244	40S ribosomal protein S15a OS=Homo sapiens OX=9606 GN=RPS15A PE=1 SV=2	FALSE	TRUE	46.1538	7	10	7	130	14.8	High	High	High	High	High	High		0.869	0.924	0.763	0.852	0.0818352	9.60507	161.1	140.1	151.4	139.8	180	137.4	5	5	5	5	5	5	23.89
High	Q9H0H0	Integrator complex subunit 2 OS=Homo sapiens OX=9606 GN=INTS2 PE=1 SV=2	FALSE	TRUE	8.72093	7	7	7	1204	134.2	High	High	High	High	High	High		0.823	1.153	0.581	0.852333	0.287126	33.6871	114.9	94.5	82.4	95	138.1	80.2	4	4	4	4	4	4	16.67
High	A0A024R9W7	Transmembrane protein 33, isoform CRA_a OS=Homo sapiens OX=9606 GN=TMEM33 PE=4 SV=1	FALSE	TRUE	30.7692	7	9	7	247	28	High	High	High	High	High	High		0.826	1.144	0.589	0.853	0.278483	32.6475	104.2	86.1	86	98.4	140	82.4	4	4	4	4	4	4	23.26
High	O95071	E3 ubiquitin-protein ligase UBR5 OS=Homo sapiens OX=9606 GN=UBR5 PE=1 SV=2	FALSE	TRUE	2.85816	7	7	6	2799	309.2	High	High	High	High	High	High		0.802	1.248	0.51	0.853333	0.371668	43.5549	64.1	51.4	48.4	60.4	85.9	43.8	4	4	4	4	4	4	17.04
High	A0A024QZY5	PRP4 pre-mRNA processing factor 4 homolog B (Yeast), isoform CRA_a OS=Homo sapiens OX=9606 GN=PRPF4B PE=4 SV=1	FALSE	TRUE	8.63952	7	7	7	1007	116.9	High	High	High	High	High	High		0.813	1.08	0.668	0.853667	0.208989	24.4813	62.8	51	53.5	57.8	77	51.4	4	4	4	4	4	4	16.07
High	Q8IY18	Structural maintenance of chromosomes protein 5 OS=Homo sapiens OX=9606 GN=SMC5 PE=1 SV=2	FALSE	TRUE	5.72207	7	8	7	1101	128.7	High	High	High	High	High	High		0.888	1.09	0.583	0.853667	0.255238	29.899	84.7	75.2	62.8	68.4	110.1	64.2	4	4	4	4	4	4	15.45
High	A8K0B9	rRNA adenine N(6)-methyltransferase OS=Homo sapiens OX=9606 PE=2 SV=1	FALSE	TRUE	20.8092	7	7	7	346	39.5	High	High	High	High	High	High		0.841	1.116	0.612	0.856333	0.25235	29.4686	129	108.5	103.9	115.9	177	108.4	4	4	4	4	4	4	11.06
High	A0A024R0H1	Solute carrier family 16 (Monocarboxylic acid transporters), member 1, isoform CRA_b OS=Homo sapiens OX=9606 GN=SLC16A1 PE=4 SV=1	FALSE	TRUE	12.8	7	8	7	500	53.9	High	High	High	High	High	High		0.902	1.052	0.616	0.856667	0.221507	25.8568	245.5	221.4	187.8	197.6	302.1	186	6	6	6	6	6	6	27.29
High	Q9H936	Mitochondrial glutamate carrier 1 OS=Homo sapiens OX=9606 GN=SLC25A22 PE=1 SV=1	FALSE	TRUE	22.291	7	10	7	323	34.4	High	High	High	High	High	High		0.834	1.117	0.622	0.857667	0.248347	28.9561	115.6	96.4	82.6	92.2	140.2	87.2	5	5	5	5	5	5	27.65
High	Q5U079	Jun B proto-oncogene OS=Homo sapiens OX=9606 GN=JUNB PE=2 SV=1	FALSE	TRUE	33.4294	7	9	7	347	35.9	High	High	High	High	High	High		0.721	1.307	0.554	0.860667	0.395452	45.9472	93.3	67.3	62.9	82.2	115.8	64.2	3	3	3	3	3	3	23.12
High	Q16795	NADH dehydrogenase [ubiquinone] 1 alpha subcomplex subunit 9, mitochondrial OS=Homo sapiens OX=9606 GN=NDUFA9 PE=1 SV=2	FALSE	TRUE	18.0371	7	7	7	377	42.5	High	High	High	High	High	High		0.862	0.971	0.759	0.864	0.106014	12.2702	127.7	110.1	114.2	110.9	168.1	127.6	7	7	7	7	7	7	17.64
High	Q14694	Ubiquitin carboxyl-terminal hydrolase 10 OS=Homo sapiens OX=9606 GN=USP10 PE=1 SV=2	FALSE	TRUE	10.1504	7	7	7	798	87.1	High	High	High	High	High	High		0.929	1.099	0.565	0.864333	0.27281	31.5631	165.7	153.9	142.4	156.6	231	130.5	5	5	5	5	5	5	14.43
High	Q53GL6	RNA binding protein (Autoantigenic, hnRNP-associated with lethal yellow) long isoform variant (Fragment) OS=Homo sapiens OX=9606 GN=RALY PE=1 SV=1	FALSE	TRUE	21.1726	7	7	7	307	32.5	High	High	High	High	High	High		0.775	1.108	0.715	0.866	0.211714	24.4474	178.5	138.4	133	147.4	181.2	129.5	6	6	6	6	6	6	16.02
High	P00338	L-lactate dehydrogenase A chain OS=Homo sapiens OX=9606 GN=LDHA PE=1 SV=2	FALSE	TRUE	19.8795	7	7	7	332	36.7	High	High	High	High	High	High		0.94	0.599	1.06	0.866333	0.239166	27.6067	128.2	120.6	208	124.6	163.5	173.3	5	5	5	5	5	5	16.85
High	A0A0S2Z4T1	DNA helicase (Fragment) OS=Homo sapiens OX=9606 GN=MCM3 PE=2 SV=1	FALSE	TRUE	9.90099	7	7	7	808	90.9	High	High	High	High	High	High		1.08	0.948	0.577	0.868333	0.260792	30.0336	138.4	149.5	131.4	124.6	207.2	119.6	5	5	5	5	5	5	18.68
High	Q13823	Nucleolar GTP-binding protein 2 OS=Homo sapiens OX=9606 GN=GNL2 PE=1 SV=1	FALSE	TRUE	9.71272	7	8	7	731	83.6	High	High	High	High	High	High		0.932	1.089	0.59	0.870333	0.255152	29.3165	104.4	97.3	95.7	104.2	151.4	89.4	5	5	5	5	5	5	18.37
High	Q8WW12	PEST proteolytic signal-containing nuclear protein OS=Homo sapiens OX=9606 GN=PCNP PE=1 SV=2	FALSE	TRUE	43.2584	7	11	7	178	18.9	High	High	High	High	High	High		0.828	1.258	0.527	0.871	0.367392	42.1805	225.7	187	174.8	219.9	309.7	163.1	5	5	5	5	5	5	29.46
High	B4DWA6	cDNA FLJ60094, highly similar to F-actin capping protein subunit beta OS=Homo sapiens OX=9606 PE=2 SV=1	FALSE	TRUE	20.2985	7	8	6	335	37.5	High	High	High	High	High	High		0.84	1.08	0.7	0.873333	0.19218	22.0054	270.5	227.2	262.3	283.3	370.4	259.4	6	6	6	6	6	6	15.71
High	Q96ST3	Paired amphipathic helix protein Sin3a OS=Homo sapiens OX=9606 GN=SIN3A PE=1 SV=2	FALSE	TRUE	6.36292	7	7	7	1273	145.1	High	High	High	High	High	High		0.898	1.002	0.733	0.877667	0.135648	15.4555	140	125.7	123.4	123.6	181.5	133.1	5	5	5	5	5	5	20.55
High	O00487	26S proteasome non-ATPase regulatory subunit 14 OS=Homo sapiens OX=9606 GN=PSMD14 PE=1 SV=1	FALSE	TRUE	20.9677	7	8	7	310	34.6	High	High	High	High	High	High		0.938	1.073	0.63	0.880333	0.22706	25.7925	155.3	145.7	136.9	146.9	210.1	132.3	7	7	7	7	7	7	24.61
High	A0A1U9X9A1	VARS OS=Homo sapiens OX=9606 PE=3 SV=2	FALSE	TRUE	7.19937	7	7	7	1264	140.4	High	High	High	High	High	High		0.954	0.821	0.901	0.892	0.0669552	7.50619	51.3	49	41.3	33.9	45.3	40.8	2	2	2	2	2	2	20.26
High	P78346	Ribonuclease P protein subunit p30 OS=Homo sapiens OX=9606 GN=RPP30 PE=1 SV=1	FALSE	TRUE	33.5821	7	8	7	268	29.3	High	High	High	High	High	High		0.883	1.151	0.654	0.896	0.248755	27.7628	281.7	248.7	228.8	263.3	379.7	248.3	6	6	6	6	6	6	20.41
High	B4DYF4	cDNA FLJ56176, highly similar to Poly(A) polymerase alpha OS=Homo sapiens OX=9606 PE=2 SV=1	FALSE	TRUE	8.93561	7	7	5	761	84.5	High	High	High	High	High	High		0.906	1.092	0.69	0.896	0.201186	22.4538	59	53.4	51.8	56.6	68	46.9	3	3	3	3	3	3	19.21
High	J3KQE5	GTP-binding nuclear protein Ran (Fragment) OS=Homo sapiens OX=9606 GN=RAN PE=1 SV=1	FALSE	TRUE	30.7692	7	16	7	234	26.8	High	High	High	High	High	High		0.909	1.085	0.714	0.902667	0.185581	20.5592	569.6	517.5	507.1	550.3	735.1	524.9	7	7	7	7	7	7	47.36
High	P62081	40S ribosomal protein S7 OS=Homo sapiens OX=9606 GN=RPS7 PE=1 SV=1	FALSE	TRUE	39.1753	7	12	7	194	22.1	High	High	High	High	High	High		0.999	0.888	0.823	0.903333	0.0889963	9.85198	241.1	240.8	277.4	246.5	312.2	256.9	6	6	6	6	6	6	31.16
High	P00698	Lysozyme C OS=Gallus gallus GN=LYZ PE=1 SV=1	TRUE	FALSE	59.1837	7	12	7	147	16.2	High	High	High	High	High	High		0.877	1.178	0.672	0.909	0.254513	27.9993	225.4	197.7	182.5	215.1	289.2	194.3	6	6	6	6	6	6	34.02
High	P26368	Splicing factor U2AF 65 kDa subunit OS=Homo sapiens OX=9606 GN=U2AF2 PE=1 SV=4	FALSE	TRUE	18.1053	7	7	7	475	53.5	High	High	High	High	High	High		0.823	1.211	0.7	0.911333	0.266706	29.2655	69.8	57.4	61.3	74.3	102.5	71.7	3	3	3	3	3	3	18.77
High	P62917	60S ribosomal protein L8 OS=Homo sapiens OX=9606 GN=RPL8 PE=1 SV=2	FALSE	TRUE	33.463	7	12	7	257	28	High	High	High	High	High	High		0.957	1.087	0.693	0.912333	0.200762	22.0053	455.1	435.5	387	420.5	563.2	390.2	6	6	6	6	6	6	26.21
High	P61247	40S ribosomal protein S3a OS=Homo sapiens OX=9606 GN=RPS3A PE=1 SV=2	FALSE	TRUE	28.4091	7	8	7	264	29.9	High	High	High	High	High	High		1.061	0.693	0.984	0.912667	0.194094	21.2666	212.6	225.6	274.7	190.4	252.6	248.6	6	6	6	6	6	6	22.16
High	F8VXC8	SWI/SNF complex subunit SMARCC2 OS=Homo sapiens OX=9606 GN=SMARCC2 PE=1 SV=1	FALSE	TRUE	6.66667	7	8	4	1245	136.1	High	High	High	High	High	High		1.064	1.086	0.618	0.922667	0.264078	28.6212	26.4	28.1	22.8	24.8	34.6	21.4	2	2	2	2	2	2	19.71
High	Q8NBQ5	Estradiol 17-beta-dehydrogenase 11 OS=Homo sapiens OX=9606 GN=HSD17B11 PE=1 SV=3	FALSE	TRUE	21.3333	7	8	7	300	32.9	High	High	High	High	High	High		0.859	1.177	0.734	0.923333	0.2284	24.7364	162.2	139.3	120.9	142.3	179	131.3	5	5	5	5	5	5	21.01
High	A8K964	cDNA FLJ75071, highly similar to Homo sapiens pinin, desmosome associated protein (PNN), mRNA OS=Homo sapiens OX=9606 PE=2 SV=1	FALSE	TRUE	11.855	7	7	7	717	81.5	High	High	High	High	High	High		0.89	1.254	0.633	0.925667	0.312033	33.709	111	98.8	91.3	114.5	147.5	93.3	5	5	5	5	5	5	21.34
High	Q8TAV0	Protein FAM76A OS=Homo sapiens OX=9606 GN=FAM76A PE=2 SV=1	FALSE	TRUE	21.8241	7	8	6	307	35	High	High	High	High	High	High		0.84	1.339	0.6	0.926333	0.376989	40.6969	159.2	133.8	109.7	146.8	194.4	116.7	7	7	7	7	7	7	21.28
High	A0A0A0MRM9	Nucleolar and coiled-body phosphoprotein 1 (Fragment) OS=Homo sapiens OX=9606 GN=NOLC1 PE=1 SV=1	FALSE	TRUE	7.20339	7	7	7	708	74.6	High	High	High	High	High	High		1.071	1.041	0.706	0.939333	0.202629	21.5715	192.9	206.7	179.6	186.9	261.4	184.5	6	6	6	6	6	6	13.65
High	Q9H0C8	Integrin-linked kinase-associated serine/threonine phosphatase 2C OS=Homo sapiens OX=9606 GN=ILKAP PE=1 SV=1	FALSE	TRUE	16.5816	7	7	7	392	42.9	High	High	High	High	High	High		0.897	1.301	0.624	0.940667	0.340606	36.209	139.9	125.5	103	134	182.4	113.9	6	6	6	6	6	6	17.56
High	B2RDF2	Pescadillo homolog OS=Homo sapiens OX=9606 GN=PES1 PE=2 SV=1	FALSE	TRUE	11.3946	7	9	7	588	68	High	High	High	High	High	High		0.909	1.182	0.748	0.946333	0.219395	23.1837	147	133.7	122.7	145.1	174.2	130.3	5	5	5	5	5	5	19.28
High	A0A024R520	Synaptotagmin VII, isoform CRA_b OS=Homo sapiens OX=9606 GN=SYT7 PE=4 SV=1	FALSE	TRUE	16.3441	7	8	7	465	52.2	High	High	High	High	High	High		0.667	1.199	0.997	0.954333	0.268554	28.1405	151.3	100.9	111.3	133.5	147.4	147	4	4	4	4	4	4	12.88
High	Q53HH3	General transcription factor IIH subunit 4 (Fragment) OS=Homo sapiens OX=9606 PE=2 SV=1	FALSE	TRUE	15.5844	7	7	7	462	52.1	High	High	High	High	High	High		0.906	1.284	0.687	0.959	0.302008	31.492	134.8	122.1	107.8	138.5	180.9	124.2	4	4	4	4	4	4	16.01
High	Q9H5Q4	Dimethyladenosine transferase 2, mitochondrial OS=Homo sapiens OX=9606 GN=TFB2M PE=1 SV=1	FALSE	TRUE	16.9192	7	7	7	396	45.3	High	High	High	High	High	High		1.341	0.953	0.622	0.972	0.359876	37.0243	302.2	405.2	275.5	262.7	392.1	243.9	7	7	7	7	7	7	12.26
High	O15294	UDP-N-acetylglucosamine--peptide N-acetylglucosaminyltransferase 110 kDa subunit OS=Homo sapiens OX=9606 GN=OGT PE=1 SV=3	FALSE	TRUE	7.26577	7	7	7	1046	116.9	High	High	High	High	High	High		0.899	1.312	0.748	0.986333	0.291966	29.6012	98	88.1	75.9	99.5	125	93.5	4	4	4	4	4	4	20.3
High	B3KSZ4	cDNA FLJ37346 fis, clone BRAMY2021310, highly similar to Transcriptional repressor p66 beta OS=Homo sapiens OX=9606 PE=2 SV=1	FALSE	TRUE	13.9966	7	7	6	593	65.2	High	High	High	High	High	High		0.988	1.338	0.684	1.00333	0.32727	32.6182	58.3	57.6	45.7	61.2	80.7	55.2	4	4	4	4	4	4	15.19
High	Q13427	Peptidyl-prolyl cis-trans isomerase G OS=Homo sapiens OX=9606 GN=PPIG PE=1 SV=2	FALSE	TRUE	8.35544	7	8	7	754	88.6	High	High	High	High	High	High		1.015	1.214	0.787	1.00533	0.213664	21.2531	95.6	97	79.5	96.5	121.4	95.5	4	4	4	4	4	4	12.09
High	P62487	DNA-directed RNA polymerase II subunit RPB7 OS=Homo sapiens OX=9606 GN=POLR2G PE=1 SV=1	FALSE	TRUE	50.5814	7	16	7	172	19.3	High	High	High	High	High	High		0.992	1.45	0.588	1.01	0.431282	42.7012	408	404.5	293.9	426.2	578.5	340.4	7	7	7	7	7	7	46.82
High	P12270	Nucleoprotein TPR OS=Homo sapiens OX=9606 GN=TPR PE=1 SV=3	FALSE	TRUE	3.13161	7	7	7	2363	267.1	High	High	High	High	High	High		0.89	1.478	0.674	1.014	0.416096	41.0351	31.7	28.2	29.7	43.9	38.4	25.9	2	2	2	2	2	2	19.37
High	P36873	Serine/threonine-protein phosphatase PP1-gamma catalytic subunit OS=Homo sapiens OX=9606 GN=PPP1CC PE=1 SV=1	FALSE	TRUE	23.839	7	8	1	323	37	Medium	Medium	Medium	Medium	Medium	Medium		0.983	1.306	0.824	1.03767	0.245606	23.6691	13	12.8	11.7	15.3	20.5	16.9	1	1	1	1	1	1	15.41
High	Q16594	Transcription initiation factor TFIID subunit 9 OS=Homo sapiens OX=9606 GN=TAF9 PE=1 SV=1	FALSE	TRUE	26.1364	7	9	7	264	29	High	High	High	High	High	High		0.939	1.569	0.678	1.062	0.458058	43.1316	166.2	156	123.2	193.4	232.9	157.9	5	5	5	5	5	5	22.26
High	P00387	NADH-cytochrome b5 reductase 3 OS=Homo sapiens OX=9606 GN=CYB5R3 PE=1 SV=3	FALSE	TRUE	25.5814	7	7	7	301	34.2	High	High	High	High	High	High		1.075	1.385	1.118	1.19267	0.167947	14.0817	109.6	117.9	101.5	140.6	125.1	139.9	4	4	4	4	4	4	18.47
High	P84098	60S ribosomal protein L19 OS=Homo sapiens OX=9606 GN=RPL19 PE=1 SV=1	FALSE	TRUE	29.0816	7	8	6	196	23.5	High	High	High	High	High	High		1.317	1.434	0.855	1.202	0.306152	25.4702	251.1	330.7	193.5	277.5	324	277.1	5	5	5	5	5	5	21.15
High	Q9NWS0	PIH1 domain-containing protein 1 OS=Homo sapiens OX=9606 GN=PIH1D1 PE=1 SV=1	FALSE	TRUE	39.3103	7	12	1	290	32.3	High	High	High	High	High	High					#DIV/0!	#DIV/0!	#DIV/0!													36.82
High	P02042	Hemoglobin subunit delta OS=Homo sapiens OX=9606 GN=HBD PE=1 SV=2	FALSE	TRUE	47.619	7	17	2	147	16	High	High	High	High	High	High					#DIV/0!	#DIV/0!	#DIV/0!													51.98
High	Q13620	Cullin-4B OS=Homo sapiens OX=9606 GN=CUL4B PE=1 SV=4	FALSE	TRUE	7.11939	7	7	2	913	103.9	High	High	High	High	High	High					#DIV/0!	#DIV/0!	#DIV/0!													17.13
High	A0A2K4X4J0	MHC class I antigen OS=Homo sapiens OX=9606 GN=HLA-C PE=3 SV=1	FALSE	TRUE	16.6667	6	6	1	366	41	High	High	High	High	High	High		0.674	0.894	0.57	0.712667	0.165425	23.2121	30.4	20.5	20.7	18.5	31.4	17.9	1	1	1	1	1	1	15.38
High	A0A024QYS2	Transmembrane 9 superfamily member OS=Homo sapiens OX=9606 PE=2 SV=1	FALSE	TRUE	9.67742	6	6	6	589	67.8	High	High	High	High	High	High		0.789	0.815	0.548	0.717333	0.147222	20.5235	148.1	116.9	137.4	112	210.5	115.4	5	5	5	5	5	5	22.63
High	A0A024R6D1	NIMA (Never in mitosis gene a)-related kinase 9, isoform CRA_a OS=Homo sapiens OX=9606 GN=NEK9 PE=4 SV=1	FALSE	TRUE	7.2523	6	6	6	979	107.1	High	High	High	High	High	High		0.617	1.017	0.569	0.734333	0.24597	33.4957	49.7	30.7	37.4	38	60.5	34.4	3	3	3	3	3	3	14.74
High	Q15596	Nuclear receptor coactivator 2 OS=Homo sapiens OX=9606 GN=NCOA2 PE=1 SV=2	FALSE	TRUE	5.12295	6	6	6	1464	159.1	High	High	High	High	High	High		0.816	0.853	0.541	0.736667	0.170459	23.1393	27	22.1	23.9	20.4	39.4	21.3	1	1	1	1	1	1	15.77
High	A0A024R3Q3	ADP-ribosylation factor 1, isoform CRA_a OS=Homo sapiens OX=9606 GN=ARF1 PE=3 SV=1	FALSE	TRUE	40.884	6	8	2	181	20.7	High	High	High	High	High	High		0.8	0.541	0.9	0.747	0.185275	24.8026	39.3	31.4	53.6	29	47.2	42.5	2	2	2	2	2	2	23.65
High	Q5C9Z4	Nucleolar MIF4G domain-containing protein 1 OS=Homo sapiens OX=9606 GN=NOM1 PE=1 SV=1	FALSE	TRUE	7.44186	6	6	6	860	96.2	High	High	High	High	High	High		0.769	0.913	0.561	0.747667	0.176967	23.6692	25.9	20	24.4	22.3	39.6	22.2	2	2	2	2	2	2	14.65
High	A0A087WYL7	Mediator of RNA polymerase II transcription subunit 6 OS=Homo sapiens OX=9606 GN=MED6 PE=1 SV=1	FALSE	TRUE	29.1829	6	9	6	257	29.7	High	High	High	High	High	High		0.688	1.031	0.534	0.751	0.254419	33.8774	162	111.4	118	121.6	216.5	115.7	3	3	3	3	3	3	18.08
High	B3KW93	Sodium/potassium-transporting ATPase subunit alpha OS=Homo sapiens OX=9606 PE=2 SV=1	FALSE	TRUE	7.93478	6	7	1	920	101.2	High	High	High	High	High	High		0.718	1.007	0.552	0.759	0.230254	30.3365	10.6	7.6	9.9	10	14.5	8	1	1	1	1	1	1	22.32
High	Q6DD88	Atlastin-3 OS=Homo sapiens OX=9606 GN=ATL3 PE=1 SV=1	FALSE	TRUE	11.2754	6	7	6	541	60.5	High	High	High	High	High	High		0.893	0.919	0.471	0.761	0.251484	33.0465	94.4	84.3	84.6	77.7	140.2	66.1	4	4	4	4	4	4	19.54
High	Q13884	Beta-1-syntrophin OS=Homo sapiens OX=9606 GN=SNTB1 PE=1 SV=3	FALSE	TRUE	12.6394	6	6	5	538	58	High	High	High	High	High	High		0.757	1.024	0.504	0.761667	0.260031	34.1398	115.8	87.7	93.6	95.8	169.1	85.2	4	4	4	4	4	4	11.45
High	Q969V3	Nicalin OS=Homo sapiens OX=9606 GN=NCLN PE=1 SV=2	FALSE	TRUE	13.8544	6	6	6	563	62.9	High	High	High	High	High	High		0.893	0.832	0.562	0.762333	0.176154	23.1073	45.5	40.7	43.4	36.1	60.1	33.8	3	3	3	3	3	3	16.62
High	O96005	Cleft lip and palate transmembrane protein 1 OS=Homo sapiens OX=9606 GN=CLPTM1 PE=1 SV=1	FALSE	TRUE	11.9581	6	7	6	669	76	High	High	High	High	High	High		0.802	0.939	0.561	0.767333	0.19137	24.9396	42.4	34	38.1	35.8	54.2	30.4	2	2	2	2	2	2	19.86
High	Q13206	Probable ATP-dependent RNA helicase DDX10 OS=Homo sapiens OX=9606 GN=DDX10 PE=1 SV=2	FALSE	TRUE	8.68571	6	6	6	875	100.8	High	High	High	High	High	High		0.801	0.963	0.588	0.784	0.188077	23.9894	81.2	65	61.6	59.3	95.2	56	4	4	4	4	4	4	18.46
High	A0A0S4T1I4	MHC class I antigen OS=Homo sapiens OX=9606 GN=HLA-C PE=3 SV=1	FALSE	TRUE	21.3115	6	6	1	366	40.9	High	High	High	High	High	High		0.799	0.982	0.573	0.784667	0.204876	26.11	36.8	29.4	31.3	30.7	50.3	28.8	2	2	2	2	2	2	15.57
High	B4DLJ3	cDNA FLJ51495, highly similar to ADP-ribosylation factor 5 OS=Homo sapiens OX=9606 PE=2 SV=1	FALSE	TRUE	30.131	6	8	2	229	25.4	High	High	High	High	High	High		0.77	0.89	0.712	0.790667	0.0907818	11.4817	134	103.2	125.3	111.5	162.7	115.8	2	2	2	2	2	2	19.97
High	Q92804	TATA-binding protein-associated factor 2N OS=Homo sapiens OX=9606 GN=TAF15 PE=1 SV=1	FALSE	TRUE	11.3176	6	7	3	592	61.8	High	High	High	High	High	High		0.719	1.074	0.586	0.793	0.252276	31.8128	274	197	216.2	232.3	348.2	204.2	6	6	6	6	6	6	19.01
High	A0A024R5W1	Suppressor of hairy wing homolog 4 (Drosophila), isoform CRA_a OS=Homo sapiens OX=9606 GN=SUHW4 PE=4 SV=1	FALSE	TRUE	6.64917	6	7	6	1143	127.1	High	High	High	High	High	High		0.745	1.139	0.5	0.794667	0.322382	40.5682	88	65.6	70.1	79.9	122.7	61.4	3	3	3	3	3	3	17.26
High	Q8IY17	Neuropathy target esterase OS=Homo sapiens OX=9606 GN=PNPLA6 PE=1 SV=3	FALSE	TRUE	5.96364	6	6	6	1375	150.9	High	High	High	High	High	High		0.752	1.068	0.567	0.795667	0.253338	31.8398	60.9	45.8	48.5	51.8	79.4	45	2	2	2	2	2	2	15.1
High	Q92572	AP-3 complex subunit sigma-1 OS=Homo sapiens OX=9606 GN=AP3S1 PE=1 SV=1	FALSE	TRUE	37.3057	6	7	6	193	21.7	High	High	High	High	High	High		0.818	1.038	0.535	0.797	0.252157	31.6382	112.6	92.1	92.3	95.8	158.4	84.7	5	5	5	5	5	5	21.84
High	A0A2U3TZU2	Glucose-6-phosphate isomerase OS=Homo sapiens OX=9606 GN=GPI PE=1 SV=1	FALSE	TRUE	13.7353	6	7	6	597	67.2	High	High	High	High	High	High		0.761	1.028	0.628	0.805667	0.203706	25.2842	156.6	119.2	126.7	130.2	194.4	122	4	4	4	4	4	4	18.26
High	P48436	Transcription factor SOX-9 OS=Homo sapiens OX=9606 GN=SOX9 PE=1 SV=1	FALSE	TRUE	8.44794	6	6	6	509	56.1	High	High	High	High	High	High		0.74	1.208	0.475	0.807667	0.371155	45.954	349.7	258.9	245.9	297.1	483	229.2	5	5	5	5	5	5	9.7
High	Q6FHX6	Flap endonuclease 1 OS=Homo sapiens OX=9606 GN=FEN1 PE=2 SV=1	FALSE	TRUE	19.4737	6	7	6	380	42.6	High	High	High	High	High	High		0.869	0.958	0.608	0.811667	0.181907	22.4116	122.2	106.1	109.1	104.5	164.1	99.8	5	5	5	5	5	5	16.52
High	Q9Y5M8	Signal recognition particle receptor subunit beta OS=Homo sapiens OX=9606 GN=SRPRB PE=1 SV=3	FALSE	TRUE	33.2103	6	7	6	271	29.7	High	High	High	High	High	High		0.995	0.893	0.549	0.812333	0.233686	28.7673	49.4	49.1	50.4	45	75.2	41.3	4	4	4	4	4	4	23.21
High	Q96T76	MMS19 nucleotide excision repair protein homolog OS=Homo sapiens OX=9606 GN=MMS19 PE=1 SV=2	FALSE	TRUE	6.69903	6	6	6	1030	113.2	High	High	High	High	High	High		0.762	1.138	0.541	0.813667	0.301835	37.0957	48.5	37	31.9	36.3	65.1	35.2	2	2	2	2	2	2	12.49
High	B4DJ30	cDNA FLJ61290, highly similar to Neutral alpha-glucosidase AB OS=Homo sapiens OX=9606 PE=2 SV=1	FALSE	TRUE	7.43719	6	7	3	995	112.9	High	High	High	High	High	High		0.906	0.975	0.568	0.816333	0.217813	26.6818	91.7	83.1	88.6	86.4	126.5	71.9	4	4	4	4	4	4	16.42
High	O95758	Polypyrimidine tract-binding protein 3 OS=Homo sapiens OX=9606 GN=PTBP3 PE=1 SV=2	FALSE	TRUE	15.3986	6	7	3	552	59.7	High	High	High	High	High	High		0.865	0.991	0.594	0.816667	0.202865	24.8407	30.2	26.2	23.3	23.1	39.7	23.6	2	2	2	2	2	2	16.5
High	A0A024R821	Eukaryotic translation initiation factor 3 subunit B OS=Homo sapiens OX=9606 GN=EIF3S9 PE=3 SV=1	FALSE	TRUE	9.58231	6	6	6	814	92.4	High	High	High	High	High	High		0.91	0.999	0.541	0.816667	0.242846	29.7363	39.1	35.6	38.4	38.4	57.5	31.1	2	2	2	2	2	2	10.79
High	A0A024RDH8	Ribosomal protein L34, isoform CRA_a OS=Homo sapiens OX=9606 GN=RPL34 PE=4 SV=1	FALSE	TRUE	41.8803	6	12	6	117	13.3	High	High	High	High	High	High		0.839	0.988	0.625	0.817333	0.182467	22.3247	445.5	374	346.4	342.2	523.1	326.8	7	7	7	7	7	7	27.38
High	O75582	Ribosomal protein S6 kinase alpha-5 OS=Homo sapiens OX=9606 GN=RPS6KA5 PE=1 SV=1	FALSE	TRUE	7.73067	6	6	6	802	89.8	High	High	High	High	High	High		0.716	1.15	0.587	0.817667	0.294948	36.0719	103.4	74	79.3	91.2	137.7	80.8	3	3	3	3	3	3	16.54
High	Q96GX5	Serine/threonine-protein kinase greatwall OS=Homo sapiens OX=9606 GN=MASTL PE=1 SV=1	FALSE	TRUE	8.07736	6	7	5	879	97.3	High	High	High	High	High	High		0.866	1.025	0.576	0.822333	0.227663	27.685	14.9	12.9	11.8	12.1	15.8	9.1	1	1	1	1	1	1	20.13
High	Q9Y5A9	YTH domain-containing family protein 2 OS=Homo sapiens OX=9606 GN=YTHDF2 PE=1 SV=2	FALSE	TRUE	11.2263	6	6	4	579	62.3	High	High	High	High	High	High		0.795	1.095	0.584	0.824667	0.256788	31.1385	41.6	33.1	32.3	35.4	50	29.2	3	3	3	3	3	3	14.19
High	Q9UKD2	mRNA turnover protein 4 homolog OS=Homo sapiens OX=9606 GN=MRTO4 PE=1 SV=2	FALSE	TRUE	23.431	6	6	6	239	27.5	High	High	High	High	High	High		0.808	1.076	0.591	0.825	0.242946	29.4481	79.2	64	61.7	66.4	102.6	60.6	3	3	3	3	3	3	13.95
High	Q9HCG8	Pre-mRNA-splicing factor CWC22 homolog OS=Homo sapiens OX=9606 GN=CWC22 PE=1 SV=3	FALSE	TRUE	6.05727	6	6	6	908	105.4	High	High	High	High	High	High		0.873	0.853	0.756	0.827333	0.0625806	7.56414	28.2	24.7	23.2	19.8	39.4	29.8	2	2	2	2	2	2	11.67
High	A0A024R1I7	Tuftelin-interacting protein 11 OS=Homo sapiens OX=9606 GN=TFIP11 PE=3 SV=1	FALSE	TRUE	9.55795	6	6	5	837	96.8	High	High	High	High	High	High		0.828	1	0.661	0.829667	0.169506	20.4306	101.6	84.1	92.5	92.5	131.6	87	5	5	5	5	5	5	13.18
High	Q92925	SWI/SNF-related matrix-associated actin-dependent regulator of chromatin subfamily D member 2 OS=Homo sapiens OX=9606 GN=SMARCD2 PE=1 SV=3	FALSE	TRUE	16.0075	6	7	5	531	58.9	High	High	High	High	High	High		0.855	1.028	0.609	0.830667	0.210557	25.348	92.6	79.2	78.9	81.1	118	71.9	5	5	5	5	5	5	22.66
High	Q99700	Ataxin-2 OS=Homo sapiens OX=9606 GN=ATXN2 PE=1 SV=2	FALSE	TRUE	4.26504	6	6	4	1313	140.2	High	High	High	High	High	High		0.824	1.119	0.558	0.833667	0.280625	33.6615	33.5	27.6	24.5	27.4	39.4	22	2	2	2	2	2	2	12.28
High	A0A024R713	Dihydrolipoyl dehydrogenase OS=Homo sapiens OX=9606 GN=DLD PE=3 SV=1	FALSE	TRUE	11.3949	6	6	6	509	54.1	High	High	High	High	High	High		0.898	1.116	0.5	0.838	0.312352	37.2736	83.5	75	69.6	77.6	123.7	61.8	5	5	5	5	5	5	12.57
High	P62316	Small nuclear ribonucleoprotein Sm D2 OS=Homo sapiens OX=9606 GN=SNRPD2 PE=1 SV=1	FALSE	TRUE	53.3898	6	9	6	118	13.5	High	High	High	High	High	High		0.771	1.143	0.603	0.839	0.276348	32.9377	311.1	239.9	244.3	279.2	404.1	243.7	6	6	6	6	6	6	25.29
High	Q8NBU5	ATPase family AAA domain-containing protein 1 OS=Homo sapiens OX=9606 GN=ATAD1 PE=1 SV=1	FALSE	TRUE	20.2216	6	6	6	361	40.7	High	High	High	High	High	High		0.838	1.005	0.675	0.839333	0.165004	19.6589	89.9	75.3	73.4	73.8	107.6	72.6	3	3	3	3	3	3	17.8
High	B4DRM3	cDNA FLJ54492, highly similar to Eukaryotic translation initiation factor 4B OS=Homo sapiens OX=9606 PE=2 SV=1	FALSE	TRUE	12.5	6	7	6	616	69.7	High	High	High	High	High	High		0.753	1.272	0.506	0.843667	0.390966	46.3413	76.9	58	53.7	68.3	96.5	48.8	4	4	4	4	4	4	19.44
High	Q9HCK8	Chromodomain-helicase-DNA-binding protein 8 OS=Homo sapiens OX=9606 GN=CHD8 PE=1 SV=5	FALSE	TRUE	2.90585	6	7	3	2581	290.3	High	High	High	High	High	High		0.805	1.171	0.555	0.843667	0.309815	36.7224	61.3	49.3	52.7	61.7	84.7	47	2	2	2	2	2	2	15.9
High	Q8NI36	WD repeat-containing protein 36 OS=Homo sapiens OX=9606 GN=WDR36 PE=1 SV=1	FALSE	TRUE	5.57308	6	6	6	951	105.3	High	High	High	High	High	High		0.803	1.124	0.624	0.850333	0.253338	29.7928	92.2	74.1	71.9	80.8	113.9	71.1	5	5	5	5	5	5	12.65
High	Q96JC9	ELL-associated factor 1 OS=Homo sapiens OX=9606 GN=EAF1 PE=1 SV=1	FALSE	TRUE	31.3433	6	6	6	268	29	High	High	High	High	High	High		0.824	1.065	0.67	0.853	0.19909	23.34	108.3	89.3	84.8	90.3	131	87.8	5	5	5	5	5	5	11.03
High	A0A140VK39	Protein phosphatase methylesterase 1 OS=Homo sapiens OX=9606 PE=2 SV=1	FALSE	TRUE	21.5026	6	6	6	386	42.3	High	High	High	High	High	High		0.809	1.101	0.65	0.853333	0.228745	26.8061	94.1	76.1	67.3	74.1	111.6	72.5	4	4	4	4	4	4	17.62
High	Q9BTE3	Mini-chromosome maintenance complex-binding protein OS=Homo sapiens OX=9606 GN=MCMBP PE=1 SV=2	FALSE	TRUE	10.4361	6	6	6	642	72.9	High	High	High	High	High	High		0.916	0.995	0.655	0.855333	0.177934	20.8028	122.2	111.9	112.8	112.2	156.3	102.3	5	5	5	5	5	5	17.12
High	P00966	Argininosuccinate synthase OS=Homo sapiens OX=9606 GN=ASS1 PE=1 SV=2	FALSE	TRUE	12.8641	6	7	6	412	46.5	High	High	High	High	High	High		0.811	1.225	0.535	0.857	0.347292	40.5242	133.8	108.5	102	125	181.5	97.1	5	5	5	5	5	5	14.43
High	V9HWF4	Phosphoglycerate kinase OS=Homo sapiens OX=9606 GN=HEL-S-68p PE=2 SV=1	FALSE	TRUE	13.9089	6	6	6	417	44.6	High	High	High	High	High	High		0.981	0.769	0.824	0.858	0.110014	12.8221	62.7	61.5	86.7	66.7	101.3	83.5	4	4	4	4	4	4	14.13
High	P41091	Eukaryotic translation initiation factor 2 subunit 3 OS=Homo sapiens OX=9606 GN=EIF2S3 PE=1 SV=3	FALSE	TRUE	15.678	6	6	6	472	51.1	High	High	High	High	High	High		0.973	0.922	0.682	0.859	0.155393	18.09	103	100.2	94.7	87.3	125.2	85.4	5	5	5	5	5	5	15.16
High	B4DUT8	Calponin OS=Homo sapiens OX=9606 GN=CNN2 PE=1 SV=1	FALSE	TRUE	18.7879	6	6	5	330	35.9	High	High	High	High	High	High		0.895	1.148	0.535	0.859333	0.308052	35.8478	133.3	119.3	104.7	120.2	178.4	95.4	3	3	3	3	3	3	17.39
High	A0A024R4E2	TAR DNA binding protein, isoform CRA_b OS=Homo sapiens OX=9606 GN=TARDBP PE=4 SV=1	FALSE	TRUE	15.942	6	9	6	414	44.7	High	High	High	High	High	High		0.884	1.069	0.63	0.861	0.220402	25.5984	311.7	275.4	253.6	271.1	390.4	246.1	6	6	6	6	6	6	29.08
High	Q8NBS9	Thioredoxin domain-containing protein 5 OS=Homo sapiens OX=9606 GN=TXNDC5 PE=1 SV=2	FALSE	TRUE	16.2037	6	6	6	432	47.6	High	High	High	High	High	High		0.869	1.009	0.707	0.861667	0.151133	17.5397	45.7	39.7	41.8	42.2	59.4	42	3	3	3	3	3	3	10.48
High	Q59GX7	Stearoyl-CoA desaturase variant (Fragment) OS=Homo sapiens OX=9606 PE=2 SV=1	FALSE	TRUE	21.3115	6	7	6	366	42.3	High	High	High	High	High	High		0.803	1.163	0.623	0.863	0.274955	31.8603	172.8	138.7	130	151.2	199.8	124.4	4	4	4	4	4	4	15.23
High	P61254	60S ribosomal protein L26 OS=Homo sapiens OX=9606 GN=RPL26 PE=1 SV=1	FALSE	TRUE	28.9655	6	7	6	145	17.2	High	High	High	High	High	High		0.865	0.869	0.86	0.864667	0.00450925	0.521502	232	200.7	223.2	193.9	250.8	215.6	5	5	5	5	5	5	19.23
High	O60763	General vesicular transport factor p115 OS=Homo sapiens OX=9606 GN=USO1 PE=1 SV=2	FALSE	TRUE	5.09356	6	6	6	962	107.8	High	High	High	High	High	High		0.904	1.068	0.638	0.87	0.217007	24.9433	41.9	37.8	36.3	38.8	53.9	34.4	3	3	3	3	3	3	12.85
High	P62829	60S ribosomal protein L23 OS=Homo sapiens OX=9606 GN=RPL23 PE=1 SV=1	FALSE	TRUE	50.7143	6	10	6	140	14.9	High	High	High	High	High	High		0.907	0.963	0.749	0.873	0.110977	12.7122	334.8	303.7	308.7	297.4	407.6	305.4	5	5	5	5	5	5	32.72
High	A0A024R0F6	Tripartite motif-containing 33, isoform CRA_a OS=Homo sapiens OX=9606 GN=TRIM33 PE=4 SV=1	FALSE	TRUE	5.05768	6	6	5	1127	122.4	High	High	High	High	High	High		0.843	1.162	0.619	0.874667	0.272882	31.1983	54.5	46	42.9	49.9	70.9	43.9	2	2	2	2	2	2	16.06
High	B3KMR5	cDNA FLJ12434 fis, clone NT2RM1000037, highly similar to Homo sapiens KIAA0690 protein OS=Homo sapiens OX=9606 PE=2 SV=1	FALSE	TRUE	4.39476	6	6	6	1297	143.6	High	High	High	High	High	High		0.934	1.012	0.678	0.874667	0.174726	19.9763	63.4	59.2	60.7	61.4	81.4	55.2	4	4	4	4	4	4	10.46
High	B2R841	Serine/threonine-protein kinase PLK OS=Homo sapiens OX=9606 PE=2 SV=1	FALSE	TRUE	8.45771	6	6	6	603	68.2	High	High	High	High	High	High		0.902	1.122	0.618	0.880667	0.252676	28.6915	196.2	177.1	158.4	177.7	253.6	156.6	4	4	4	4	4	4	9.64
High	P18077	60S ribosomal protein L35a OS=Homo sapiens OX=9606 GN=RPL35A PE=1 SV=2	FALSE	TRUE	43.6364	6	10	6	110	12.5	High	High	High	High	High	High		0.936	0.965	0.746	0.882333	0.118955	13.4819	571.4	534.9	551.2	531.8	731.1	545.1	6	6	6	6	6	6	24.22
High	P78318	Immunoglobulin-binding protein 1 OS=Homo sapiens OX=9606 GN=IGBP1 PE=1 SV=1	FALSE	TRUE	15.6342	6	6	6	339	39.2	High	High	High	High	High	High		0.911	1.224	0.517	0.884	0.354272	40.0761	68	62	55.9	68.4	103.8	53.7	4	4	4	4	4	4	15.59
High	P32969	60S ribosomal protein L9 OS=Homo sapiens OX=9606 GN=RPL9 PE=1 SV=1	FALSE	TRUE	35.9375	6	12	6	192	21.9	High	High	High	High	High	High		0.932	1.004	0.728	0.888	0.143164	16.1221	183	170.5	166.6	167.2	240.4	175.1	5	5	5	5	5	5	39.08
High	Q96HS1	Serine/threonine-protein phosphatase PGAM5, mitochondrial OS=Homo sapiens OX=9606 GN=PGAM5 PE=1 SV=2	FALSE	TRUE	27.6817	6	8	6	289	32	High	High	High	High	High	High		0.91	1.063	0.693	0.888667	0.18592	20.9213	440.1	400.3	359.5	382.1	556.8	385.9	6	6	6	6	6	6	16.53
High	P57721	Poly(rC)-binding protein 3 OS=Homo sapiens OX=9606 GN=PCBP3 PE=2 SV=2	FALSE	TRUE	19.6765	6	9	1	371	39.4	High	High	High	High	High	High		0.889	1.172	0.61	0.890333	0.281002	31.5615	23.5	20.9	17.1	20.1	31.3	19.1	1	1	1	1	1	1	26.76
High	Q75N03	E3 ubiquitin-protein ligase Hakai OS=Homo sapiens OX=9606 GN=CBLL1 PE=1 SV=1	FALSE	TRUE	15.6823	6	6	6	491	54.5	High	High	High	High	High	High		0.579	1.106	0.987	0.890667	0.276392	31.032	191.3	110.7	128.5	142.1	132.7	131	5	5	5	5	5	4	11.71
High	A0A2R8YD14	40S ribosomal protein S24 OS=Homo sapiens OX=9606 GN=RPS24 PE=1 SV=1	FALSE	TRUE	31.5152	6	11	6	165	19.2	High	High	High	High	High	High		0.879	1.098	0.698	0.891667	0.200301	22.4636	550.9	484.5	484.9	532.3	701.6	489.6	6	6	6	6	6	6	31.88
High	Q05C46	CASC5 protein (Fragment) OS=Homo sapiens OX=9606 GN=CASC5 PE=2 SV=1	FALSE	TRUE	20.3791	6	6	2	422	47.9	High	High	High	High	High	High		0.898	1.108	0.673	0.893	0.217543	24.3609	11.7	10.5	8.1	9	15	10.1	1	1	1	1	1	1	19.49
High	Q9ULX6	A-kinase anchor protein 8-like OS=Homo sapiens OX=9606 GN=AKAP8L PE=1 SV=4	FALSE	TRUE	13.6223	6	7	6	646	71.6	High	High	High	High	High	High		0.881	1.176	0.633	0.896667	0.271839	30.3166	52.5	46.3	42.9	50.4	72.5	45.9	3	3	3	3	3	3	21.75
High	O15091	Mitochondrial ribonuclease P catalytic subunit OS=Homo sapiens OX=9606 GN=KIAA0391 PE=1 SV=2	FALSE	TRUE	11.1492	6	6	6	583	67.3	High	High	High	High	High	High		0.954	1.159	0.578	0.897	0.294664	32.85	101.4	96.7	75.3	87.3	135.4	78.3	5	5	5	5	5	5	15.38
High	P26373	60S ribosomal protein L13 OS=Homo sapiens OX=9606 GN=RPL13 PE=1 SV=4	FALSE	TRUE	27.0142	6	7	6	211	24.2	High	High	High	High	High	High		0.939	0.901	0.859	0.899667	0.0400167	4.44794	241.6	227	244.9	220.7	296.8	255	4	4	4	4	4	4	15.33
High	Q96L73	Histone-lysine N-methyltransferase, H3 lysine-36 and H4 lysine-20 specific OS=Homo sapiens OX=9606 GN=NSD1 PE=1 SV=1	FALSE	TRUE	2.55935	6	6	5	2696	296.5	High	High	High	High	High	High		0.748	1.233	0.719	0.9	0.288751	32.0834	59.9	44.8	49.3	60.8	77.6	55.8	3	3	3	3	3	3	11.11
High	Q86UU0	B-cell CLL/lymphoma 9-like protein OS=Homo sapiens OX=9606 GN=BCL9L PE=1 SV=1	FALSE	TRUE	4.8032	6	6	6	1499	157	High	High	High	High	High	High		0.771	1.299	0.631	0.900333	0.35228	39.1278	43.9	33.9	29	37.7	60.4	38.1	2	2	2	2	2	2	16.99
High	Q2TNI1	Caveolin OS=Homo sapiens OX=9606 GN=CAV1 PE=2 SV=1	FALSE	TRUE	36.5169	6	8	6	178	20.5	High	High	High	High	High	High		0.972	1.081	0.65	0.901	0.2241	24.8724	159.4	154.9	131.8	142.5	216.5	140.8	5	5	5	5	5	5	19.8
High	Q9BRX9	WD repeat domain-containing protein 83 OS=Homo sapiens OX=9606 GN=WDR83 PE=1 SV=1	FALSE	TRUE	24.127	6	6	6	315	34.3	High	High	High	High	High	High		0.87	1.339	0.503	0.904	0.419036	46.3535	82.3	71.6	69.1	92.5	129.3	65.1	4	4	4	4	4	4	17.37
High	P27635	60S ribosomal protein L10 OS=Homo sapiens OX=9606 GN=RPL10 PE=1 SV=4	FALSE	TRUE	33.6449	6	7	2	214	24.6	High	Medium	High	High	High	Medium		0.972	0.92	0.825	0.905667	0.0745408	8.23049	511.7	497.4	521.7	479.9	643.5	531.1	5	5	5	5	5	5	16.12
High	Q59FR2	MGC13098 protein variant (Fragment) OS=Homo sapiens OX=9606 PE=2 SV=1	FALSE	TRUE	24.4444	6	13	2	180	19	High	High	High	High	High	High		0.797	1.255	0.666	0.906	0.309259	34.1345	418.8	333.7	308.4	387.1	588.6	391.9	5	5	5	5	5	5	25.34
High	A0A0S2Q0B1	AT-rich interactive domain-containing protein 1A OS=Homo sapiens OX=9606 GN=ARID1A PE=4 SV=1	FALSE	TRUE	2.84464	6	6	6	2285	241.9	High	High	High	High	High	High		0.866	1.167	0.685	0.906	0.243477	26.8738	93.9	81.3	84.7	98.8	116.9	80.1	4	4	4	4	4	4	7.36
High	A0A0A6YYL6	Protein RPL17-C18orf32 OS=Homo sapiens OX=9606 GN=RPL17-C18orf32 PE=3 SV=1	FALSE	TRUE	28.9474	6	9	6	228	26.4	High	High	High	High	High	High		0.889	1.031	0.811	0.910333	0.111541	12.2527	179.1	159.2	188.5	194.4	238.9	193.7	5	5	5	5	5	5	22.34
High	O75909	Cyclin-K OS=Homo sapiens OX=9606 GN=CCNK PE=1 SV=2	FALSE	TRUE	15	6	6	6	580	64.2	High	High	High	High	High	High		0.978	1.113	0.651	0.914	0.237556	25.9908	83.6	81.7	65.7	73.1	111.6	72.7	4	4	4	4	4	4	14.9
High	P82675	28S ribosomal protein S5, mitochondrial OS=Homo sapiens OX=9606 GN=MRPS5 PE=1 SV=2	FALSE	TRUE	14.186	6	6	6	430	48	High	High	High	High	High	High		0.893	1.191	0.67	0.918	0.261398	28.4747	163.3	145.8	134.6	160.4	220	147.5	5	5	5	5	5	5	10.98
High	Q8N1N4	Keratin, type II cytoskeletal 78 OS=Homo sapiens OX=9606 GN=KRT78 PE=1 SV=2	FALSE	TRUE	9.61538	6	9	2	520	56.8	High	High	High	High	High	High		0.38	1.273	1.104	0.919	0.474374	51.6185	76	28.9	51.6	65.7	54.8	60.5	2	2	2	2	2	2	12.63
High	Q9BQ39	ATP-dependent RNA helicase DDX50 OS=Homo sapiens OX=9606 GN=DDX50 PE=1 SV=1	FALSE	TRUE	7.05563	6	8	4	737	82.5	High	High	High	High	High	High		0.908	1.169	0.717	0.931333	0.226902	24.3631	73.5	66.7	60.2	70.4	92.8	66.5	3	3	3	3	3	3	19.59
High	P20020	Plasma membrane calcium-transporting ATPase 1 OS=Homo sapiens OX=9606 GN=ATP2B1 PE=1 SV=4	FALSE	TRUE	4.5082	6	6	6	1220	134.6	High	High	High	High	High	High		1.121	1.062	0.614	0.932333	0.277259	29.7381	67.2	75.3	53.6	56.9	82.3	50.5	3	3	3	3	3	3	10.58
High	Q9NVR2	Integrator complex subunit 10 OS=Homo sapiens OX=9606 GN=INTS10 PE=1 SV=2	FALSE	TRUE	10.1408	6	7	6	710	82.2	High	High	High	High	High	High		0.903	1.202	0.696	0.933667	0.25439	27.2464	22.9	20.7	18.6	22.3	32.2	22.4	2	2	2	2	2	2	13.53
High	J3KPF3	4F2 cell-surface antigen heavy chain OS=Homo sapiens OX=9606 GN=SLC3A2 PE=1 SV=1	FALSE	TRUE	10.7765	6	6	6	631	68.1	High	High	High	High	High	High		0.927	1.167	0.728	0.940667	0.219819	23.3684	39.1	36.2	38.1	44.5	59.9	43.6	2	2	2	2	2	2	14.75
High	A0A024RAC5	Regulator of chromosome condensation 2, isoform CRA_a OS=Homo sapiens OX=9606 GN=RCC2 PE=4 SV=1	FALSE	TRUE	11.6858	6	6	6	522	56	High	High	High	High	High	High		0.94	1.041	0.845	0.942	0.0980153	10.405	53.7	50.5	44.9	46.7	62.4	52.7	3	3	3	3	3	3	10.63
High	Q15084	Protein disulfide-isomerase A6 OS=Homo sapiens OX=9606 GN=PDIA6 PE=1 SV=1	FALSE	TRUE	16.5909	6	7	6	440	48.1	High	High	High	High	High	High		1.03	0.784	1.018	0.944	0.138694	14.6922	52.9	54.5	63.2	49.5	68.5	69.7	4	4	4	4	4	4	17.29
High	A0A024R1C1	Peptidylprolyl isomerase (Cyclophilin)-like 2, isoform CRA_b OS=Homo sapiens OX=9606 GN=PPIL2 PE=4 SV=1	FALSE	TRUE	13.2692	6	6	6	520	58.8	High	High	High	High	High	High		0.871	1.377	0.605	0.951	0.392168	41.2375	70.6	61.5	56.8	78.3	106.6	64.5	4	4	4	4	4	4	10.18
High	F8W727	60S ribosomal protein L32 OS=Homo sapiens OX=9606 GN=RPL32 PE=1 SV=1	FALSE	TRUE	37.9085	6	9	6	153	18	High	High	High	High	High	High		1.071	0.932	0.857	0.953333	0.108583	11.3899	239.6	256.5	245.3	228.7	293.6	251.5	5	5	5	5	5	5	18.45
High	E7ESZ7	NADH dehydrogenase [ubiquinone] 1 alpha subcomplex subunit 10, mitochondrial OS=Homo sapiens OX=9606 GN=NDUFA10 PE=1 SV=1	FALSE	TRUE	14.8718	6	7	6	390	44.7	High	High	High	High	High	High		0.925	1.26	0.689	0.958	0.286927	29.9506	179.1	165.6	130.4	164.3	218	150.2	5	5	5	5	5	5	21.03
High	B2R4R0	Histone H4 OS=Homo sapiens OX=9606 GN=HIST1H4L PE=2 SV=1	FALSE	TRUE	51.4563	6	12	6	103	11.4	High	High	High	High	High	High		1.026	1.007	0.855	0.962667	0.0937248	9.73595	299.3	307	306.4	308.5	420	359.3	7	7	7	7	7	7	36.03
High	A4D2N6	Ubiquitin specific protease 42 OS=Homo sapiens OX=9606 GN=USP42 PE=3 SV=1	FALSE	TRUE	6.44444	6	6	1	1350	148.1	High	High	High	High	High	High		0.883	1.304	0.758	0.981667	0.28606	29.1402	83.9	74.1	59.8	77.9	100.5	76.2	4	4	4	4	4	4	18.4
High	Q9NPF5	DNA methyltransferase 1-associated protein 1 OS=Homo sapiens OX=9606 GN=DMAP1 PE=1 SV=1	FALSE	TRUE	16.4882	6	7	6	467	53	High	High	High	High	High	High		0.959	1.248	0.739	0.982	0.255278	25.9958	108.3	103.8	94.2	117.6	128.9	95.2	2	2	2	2	2	2	19.16
High	B3KPJ8	cDNA FLJ31881 fis, clone NT2RP7002829, highly similar to Lethal(3)malignant brain tumor-like 2 protein OS=Homo sapiens OX=9606 PE=2 SV=1	FALSE	TRUE	9.92908	6	6	6	705	79.1	High	High	High	High	High	High		0.797	1.496	0.658	0.983667	0.449104	45.6561	70.8	56.4	59.4	88.9	94.9	62.4	1	1	1	1	1	1	18.45
High	Q13185	Chromobox protein homolog 3 OS=Homo sapiens OX=9606 GN=CBX3 PE=1 SV=4	FALSE	TRUE	27.3224	6	8	6	183	20.8	High	High	High	High	High	High		0.955	1.438	0.587	0.993333	0.426793	42.9657	96.2	91.9	77.7	111.7	141.2	82.9	4	4	4	4	4	4	19.36
High	A0A0G2JK44	Bromodomain-containing protein 2 OS=Homo sapiens OX=9606 GN=BRD2 PE=1 SV=1	FALSE	TRUE	7.05742	6	7	4	836	92	High	High	High	High	High	High		0.927	1.45	0.627	1.00133	0.416505	41.595	60.3	55.9	47.7	69.2	95.7	60	3	3	3	3	3	3	19.26
High	A8K4Z4	60S acidic ribosomal protein P0 OS=Homo sapiens OX=9606 PE=2 SV=1	FALSE	TRUE	25.2366	6	6	6	317	34.2	High	High	High	High	High	High		0.886	0.559	1.567	1.004	0.514256	51.2207	60.6	53.7	67.1	37.5	68.9	108	4	4	4	4	4	4	10.23
High	A0A024R5X2	HCG2001986, isoform CRA_a OS=Homo sapiens OX=9606 GN=hCG_2001986 PE=4 SV=1	FALSE	TRUE	14.2222	6	6	6	450	49.9	High	High	High	High	High	High		0.794	1.348	0.872	1.00467	0.299882	29.8489	47.4	37.6	36.5	49.2	50	43.6	3	3	3	3	3	3	14.1
High	Q6FHK7	PSME3 protein OS=Homo sapiens OX=9606 GN=PSME3 PE=2 SV=1	FALSE	TRUE	19.2913	6	6	6	254	29.6	High	High	High	High	High	High		0.791	1.275	0.989	1.01833	0.24333	23.8949	74	58.5	67.2	85.7	91.9	90.9	4	4	4	4	4	4	15.56
High	O75391	Sperm-associated antigen 7 OS=Homo sapiens OX=9606 GN=SPAG7 PE=1 SV=2	FALSE	TRUE	22.0264	6	6	6	227	26	High	High	High	High	High	High		1.072	1.401	0.602	1.025	0.401568	39.1774	154.3	165.5	91.5	128.2	151.8	91.4	4	4	4	4	4	4	18.05
High	A0A0A0MTC1	E3 ubiquitin-protein ligase RNF213 OS=Homo sapiens OX=9606 GN=RNF213 PE=1 SV=1	FALSE	TRUE	1.1796	6	6	6	5256	596.1	High	High	High	High	High	High		0.915	1.495	0.706	1.03867	0.408779	39.3561	31.3	28.6	18.4	27.5	27.9	19.7	2	2	2	2	2	2	11.82
High	A0A0S2Z462	ArfGAP with FG repeats 1 isoform 2 (Fragment) OS=Homo sapiens OX=9606 GN=AGFG1 PE=2 SV=1	FALSE	TRUE	9.63455	6	7	6	602	62.6	High	High	High	High	High	High		1.057	1.313	0.75	1.04	0.281885	27.1043	66.8	70.7	52.2	68.5	79.7	59.8	3	3	3	3	3	3	13.4
High	O60287	Nucleolar pre-ribosomal-associated protein 1 OS=Homo sapiens OX=9606 GN=URB1 PE=1 SV=4	FALSE	TRUE	2.68604	6	6	5	2271	254.2	High	High	High	High	High	High		1.014	1.462	0.665	1.047	0.399523	38.1589	44.9	45.5	30.5	44.6	55.3	36.8	2	2	2	2	2	2	12.31
High	Q13257	Mitotic spindle assembly checkpoint protein MAD2A OS=Homo sapiens OX=9606 GN=MAD2L1 PE=1 SV=1	FALSE	TRUE	24.878	6	7	6	205	23.5	High	High	High	High	High	High		0.832	1.536	0.857	1.075	0.399433	37.1566	27.2	22.6	18.2	28	28.6	24.5	1	1	1	1	1	1	18.64
High	Q4KMR3	MYO1E variant protein OS=Homo sapiens OX=9606 GN=MYO1E PE=2 SV=1	FALSE	TRUE	5.32491	6	6	6	1108	127	High	High	High	High	High	High		1.171	1.412	0.727	1.10333	0.347477	31.4934	50.9	59.6	39.9	56.3	68.4	49.7	3	3	3	3	3	3	11.16
High	F8W1S1	Keratin, type II cytoskeletal 74 OS=Homo sapiens OX=9606 GN=KRT74 PE=1 SV=1	TRUE	TRUE	7.36648	6	14	1	543	59.4	High	High	High	High	High	High		0.282	1.778	1.437	1.16567	0.784041	67.2612	63.3	17.9	19.8	35.2	21.3	30.6	1	1	1	1	1	1	36.68
High	Q6PJV4	THRAP3 protein (Fragment) OS=Homo sapiens OX=9606 GN=THRAP3 PE=2 SV=1	FALSE	TRUE	22.6667	6	9	1	375	41.8	High	High	High	High	High	High		1.189	1.245	1.119	1.18433	0.0631295	5.33038	11.5	13.7	15	18.7	15.9	17.8	1	1	1	1	1	1	26.08
High	E5RFJ8	DNA replication licensing factor MCM4 (Fragment) OS=Homo sapiens OX=9606 GN=MCM4 PE=1 SV=8	FALSE	TRUE	38.3886	6	8	1	211	23.4	High	High	High	High	High	High					#DIV/0!	#DIV/0!	#DIV/0!													30.29
High	B4DWG7	cDNA FLJ55451, highly similar to Ubiquitin carboxyl-terminal hydrolase 42 (EC3.1.2.15) (Fragment) OS=Homo sapiens OX=9606 PE=2 SV=1	FALSE	TRUE	8.42912	6	6	1	1044	114.4	High	High	High	High	High	High					#DIV/0!	#DIV/0!	#DIV/0!													19.91
High	A0A0M4FEM1	Alpha-1,4 glucan phosphorylase OS=Homo sapiens OX=9606 GN=PYGM PE=3 SV=1	FALSE	TRUE	9.50119	6	6	2	842	97.1	High	High	High	High	High	High					#DIV/0!	#DIV/0!	#DIV/0!													17.09
High	P31942	Heterogeneous nuclear ribonucleoprotein H3 OS=Homo sapiens OX=9606 GN=HNRNPH3 PE=1 SV=2	FALSE	TRUE	18.7861	6	8	4	346	36.9	High	High	High	High	High	High					#DIV/0!	#DIV/0!	#DIV/0!													18.46
High	A0A024R321	Filamin B, beta (Actin binding protein 278), isoform CRA_a OS=Homo sapiens OX=9606 GN=FLNB PE=4 SV=1	FALSE	TRUE	2.02136	6	6	2	2622	280.3	High	High	High	High	High	High					#DIV/0!	#DIV/0!	#DIV/0!													14.67
High	O60216	Double-strand-break repair protein rad21 homolog OS=Homo sapiens OX=9606 GN=RAD21 PE=1 SV=2	FALSE	TRUE	9.50872	5	6	5	631	71.6	High	High	High	High	High	High		0.718	0.863	0.522	0.701	0.171134	24.4129	128.5	92.2	99.2	85.6	166.7	87.1	4	4	4	4	4	4	12.95
High	Q14498	RNA-binding protein 39 OS=Homo sapiens OX=9606 GN=RBM39 PE=1 SV=2	FALSE	TRUE	12.8302	5	5	5	530	59.3	High	High	High	High	High	High		0.734	0.875	0.512	0.707	0.183	25.884	26.2	19.3	25	21.9	33.4	17.1	1	1	1	1	1	1	16.31
High	Q13363	C-terminal-binding protein 1 OS=Homo sapiens OX=9606 GN=CTBP1 PE=1 SV=2	FALSE	TRUE	12.9545	5	6	3	440	47.5	High	High	High	High	High	High		0.603	0.982	0.537	0.707333	0.240146	33.951	32	19.3	22	21.6	33.5	18	1	1	1	1	1	1	14.96
High	O60583	Cyclin-T2 OS=Homo sapiens OX=9606 GN=CCNT2 PE=1 SV=2	FALSE	TRUE	6.16438	5	6	2	730	81	High	High	High	High	High	High		0.715	0.933	0.489	0.712333	0.222012	31.1669	45.9	32.8	36.1	33.7	58.5	28.6	1	1	1	1	1	1	12.31
High	C9J7E5	Transportin-3 OS=Homo sapiens OX=9606 GN=TNPO3 PE=1 SV=1	FALSE	TRUE	6.47858	5	6	5	957	108	High	High	High	High	High	High		0.757	0.837	0.565	0.719667	0.13979	19.4243	46.3	35	35.6	29.8	57	32.2	2	2	2	2	2	2	16
High	Q9NUQ8	ATP-binding cassette sub-family F member 3 OS=Homo sapiens OX=9606 GN=ABCF3 PE=1 SV=2	FALSE	TRUE	7.19323	5	5	5	709	79.7	High	High	High	High	High	High		0.776	0.958	0.449	0.727667	0.257919	35.4447	39.7	30.8	29.9	28.7	45.9	20.6	2	2	2	2	2	2	10.34
High	Q96A33	Coiled-coil domain-containing protein 47 OS=Homo sapiens OX=9606 GN=CCDC47 PE=1 SV=1	FALSE	TRUE	10.352	5	6	5	483	55.8	High	High	High	High	High	High		0.754	0.919	0.513	0.728667	0.204182	28.0213	80.7	60.8	65.1	59.8	90.5	46.4	3	3	3	3	3	3	13.18
High	A8K8Z3	cDNA FLJ77613, highly similar to Homo sapiens tousled-like kinase 1 (TLK1), mRNA OS=Homo sapiens OX=9606 PE=2 SV=1	FALSE	TRUE	6.52742	5	6	2	766	86.6	High	High	High	High	High	High		0.72	0.957	0.527	0.734667	0.215375	29.316	23.2	16.7	19.9	19	32.8	17.3	1	1	1	1	1	1	16.28
High	P15559	NAD(P)H dehydrogenase [quinone] 1 OS=Homo sapiens GN=NQO1 PE=1 SV=1	TRUE	TRUE	21.1679	5	5	5	274	30.8	High	High	High	High	High	High		0.842	0.685	0.7	0.742333	0.0866391	11.6712	117.6	99	126.7	86.8	153.4	107.4	4	4	4	4	4	4	14.02
High	A0A0S2Z5V7	Histocompatibility 13 isoform 1 (Fragment) OS=Homo sapiens OX=9606 GN=HM13 PE=2 SV=1	FALSE	TRUE	12.9973	5	5	5	377	41.5	High	High	High	High	High	High		0.795	0.86	0.578	0.744333	0.14767	19.8392	71.9	57.2	60.1	51.7	89.5	51.7	2	2	2	2	2	2	13.26
High	B4DTK7	cDNA FLJ61387, highly similar to Homo sapiens conserved nuclear protein NHN1 (NHN1), mRNA OS=Homo sapiens OX=9606 PE=2 SV=1	FALSE	TRUE	4.913	5	5	5	977	108.9	High	High	High	High	High	High		0.771	0.964	0.509	0.748	0.22837	30.5308	156.2	120.4	127.5	122.9	215.5	109.6	4	4	4	4	4	4	11.45
High	Q9Y2R4	Probable ATP-dependent RNA helicase DDX52 OS=Homo sapiens OX=9606 GN=DDX52 PE=1 SV=3	FALSE	TRUE	11.6861	5	5	5	599	67.5	High	High	High	High	High	High		0.825	0.861	0.562	0.749333	0.163231	21.7835	92.8	76.6	79.3	68.3	115.4	64.9	4	4	4	4	4	4	14.33
High	A8K245	cDNA FLJ75441, highly similar to Homo sapiens vaccinia related kinase 1 (VRK1), mRNA OS=Homo sapiens OX=9606 PE=2 SV=1	FALSE	TRUE	17.1717	5	6	5	396	45.4	High	High	High	High	High	High		0.827	0.829	0.599	0.751667	0.132217	17.5898	64.8	53.6	56.2	46.6	72.5	43.4	2	2	2	2	2	2	15.53
High	Q9C075	Keratin, type I cytoskeletal 23 OS=Homo sapiens OX=9606 GN=KRT23 PE=1 SV=2	TRUE	TRUE	10.4265	5	7	3	422	48.1	High	High	High	High	High	High		0.735	1.061	0.487	0.761	0.287882	37.8294	12.1	8.9	12.7	13.5	19.9	9.7	1	1	1	1	1	1	11.33
High	P63244	Receptor of activated protein C kinase 1 OS=Homo sapiens OX=9606 GN=RACK1 PE=1 SV=3	FALSE	TRUE	16.0883	5	5	5	317	35.1	High	High	High	High	High	High		0.868	0.505	0.911	0.761333	0.22303	29.2946	67.4	58.5	116.3	58.7	81.6	74.3	3	3	3	3	3	3	10.47
High	Q13344	Fus-like protein (Fragment) OS=Homo sapiens OX=9606 PE=2 SV=1	FALSE	TRUE	7.19697	5	6	2	528	53.3	High	High	High	High	High	High		0.71	1.106	0.47	0.762	0.321173	42.1487	65.6	46.5	51.1	56.5	97	45.6	1	1	1	1	1	1	16.47
High	Q8TCJ2	Dolichyl-diphosphooligosaccharide--protein glycosyltransferase subunit STT3B OS=Homo sapiens OX=9606 GN=STT3B PE=1 SV=1	FALSE	TRUE	5.56901	5	6	4	826	93.6	High	High	High	High	High	High		0.786	0.912	0.606	0.768	0.153792	20.025	135.4	106.3	111.4	101.6	164.1	99.5	2	2	2	2	2	2	16.26
High	Q9UHD2	Serine/threonine-protein kinase TBK1 OS=Homo sapiens OX=9606 GN=TBK1 PE=1 SV=1	FALSE	TRUE	7.54458	5	5	5	729	83.6	High	High	High	High	High	High		0.678	0.959	0.7	0.779	0.156272	20.0606	36.9	25	28.1	26.9	40.4	28.3	2	2	2	2	2	2	7.59
High	Q9UBF2	Coatomer subunit gamma-2 OS=Homo sapiens OX=9606 GN=COPG2 PE=1 SV=1	FALSE	TRUE	5.97015	5	6	3	871	97.6	High	High	High	High	High	High		0.838	1.002	0.506	0.782	0.252697	32.3143	60	50.3	46.4	46.5	77.8	39.4	2	2	2	2	2	2	17.77
High	G5E9Z2	Cisplatin resistance related protein CRR9p, isoform CRA_c OS=Homo sapiens OX=9606 GN=CLPTM1L PE=1 SV=1	FALSE	TRUE	17.6152	5	6	5	369	43.3	High	High	High	High	High	High		0.778	0.992	0.582	0.784	0.205066	26.1564	166.9	129.8	139.3	138.2	217.3	126.5	4	4	4	4	4	4	17.07
High	A0A024R071	Nucleoporin 155kDa, isoform CRA_a OS=Homo sapiens OX=9606 GN=NUP155 PE=4 SV=1	FALSE	TRUE	5.17613	5	5	5	1391	155.1	High	High	High	High	High	High		0.816	1.052	0.5	0.789333	0.276964	35.0884	14.7	12	13.3	14	24	12	1	1	1	1	1	1	15.4
High	Q9H4L4	Sentrin-specific protease 3 OS=Homo sapiens OX=9606 GN=SENP3 PE=1 SV=2	FALSE	TRUE	8.01394	5	5	5	574	65	High	High	High	High	High	High		0.834	0.983	0.555	0.790667	0.217266	27.4788	113.9	95	89.7	88.1	142.4	79	3	3	3	3	3	3	11.16
High	J3KNF8	Cytochrome b5 type B (Outer mitochondrial membrane), isoform CRA_a OS=Homo sapiens OX=9606 GN=CYB5B PE=1 SV=1	FALSE	TRUE	54	5	5	5	150	16.7	High	High	High	High	High	High		0.811	0.584	0.98	0.791667	0.198707	25.0998	62.2	50.5	90.7	53	83.8	82.1	3	3	3	3	3	3	18.34
High	J3KN66	Torsin-1A-interacting protein 1 OS=Homo sapiens OX=9606 GN=TOR1AIP1 PE=1 SV=1	FALSE	TRUE	9.01503	5	5	4	599	67.8	High	High	High	High	High	High		0.838	0.866	0.676	0.793333	0.102574	12.9294	61	51.1	48.4	41.9	75.6	51.1	3	3	3	3	3	3	14.47
High	A0A0J9YX62	DnaJ homolog subfamily B member 6 OS=Homo sapiens OX=9606 GN=DNAJB6 PE=1 SV=1	FALSE	TRUE	14.0719	5	7	5	334	36.6	High	High	High	High	High	High		0.748	1.042	0.594	0.794667	0.227617	28.643	211.9	158.5	176.3	183.8	273.1	162.3	4	4	4	4	4	4	17.07
High	P27824	Calnexin OS=Homo sapiens OX=9606 GN=CANX PE=1 SV=2	FALSE	TRUE	9.96622	5	5	5	592	67.5	High	High	High	High	High	High		0.868	0.548	0.968	0.794667	0.219393	27.6082	34.6	30	55.7	30.5	47.6	46.1	2	2	2	2	2	2	14.1
High	A8K6Q4	cDNA FLJ76888, highly similar to Homo sapiens RNA binding motif protein 6 (RBM6), mRNA OS=Homo sapiens OX=9606 PE=2 SV=1	FALSE	TRUE	3.73998	5	5	2	1123	128.5	High	High	High	High	High	High		1.038	0.986	0.366	0.796667	0.373873	46.9297	15.9	16.5	13.9	13.7	49.2	18	1	1	1	1	1	1	10.22
High	F8VYN9	ADP-ribosylation factor-like protein 1 OS=Homo sapiens OX=9606 GN=ARL1 PE=1 SV=1	FALSE	TRUE	20.6186	5	6	5	194	21.8	High	High	High	High	High	High		0.805	1.062	0.524	0.797	0.269089	33.7628	244.5	196.9	174.7	185.5	319.4	167.5	4	4	4	4	4	4	19.83
High	Q5T1Z8	Pumilio homolog 1 (Drosophila), isoform CRA_c OS=Homo sapiens OX=9606 GN=PUM1 PE=1 SV=1	FALSE	TRUE	4.82026	5	5	5	1224	130	High	High	High	High	High	High		0.95	0.909	0.547	0.802	0.221786	27.6541	77.6	73.7	78.7	71.5	113.2	61.9	5	5	5	5	5	5	12.39
High	A0A024QZY1	JTV1 gene, isoform CRA_a OS=Homo sapiens OX=9606 GN=JTV1 PE=4 SV=1	FALSE	TRUE	21.5625	5	6	5	320	35.3	High	High	High	High	High	High		0.798	1.079	0.53	0.802333	0.274526	34.2159	53.5	42.7	34.7	37.4	67.3	35.7	1	1	1	1	1	1	20.18
High	I6L975	Hydroxysteroid dehydrogenase like 1 OS=Homo sapiens OX=9606 GN=HSDL1 PE=2 SV=1	FALSE	TRUE	15.4545	5	7	5	330	36.9	High	High	High	High	High	High		0.845	0.944	0.62	0.803	0.166033	20.6766	126.8	107.1	107.1	101.1	168.2	104.2	3	3	3	3	3	3	14.44
High	Q9UEG4	Zinc finger protein 629 OS=Homo sapiens OX=9606 GN=ZNF629 PE=1 SV=2	FALSE	TRUE	10.5869	5	5	4	869	96.6	High	High	High	High	High	High		0.788	1.067	0.572	0.809	0.248167	30.6758	93.2	73.5	76.1	81.2	119.5	68.4	3	3	3	3	3	3	12.24
High	Q93008	Probable ubiquitin carboxyl-terminal hydrolase FAF-X OS=Homo sapiens OX=9606 GN=USP9X PE=1 SV=3	FALSE	TRUE	1.4786	5	6	4	2570	292.1	High	High	High	High	High	High		0.881	0.986	0.562	0.809667	0.220817	27.2726	60.5	53.3	58.4	57.6	79.6	44.7	2	2	2	2	2	2	10.85
High	V9HVY3	Protein disulfide-isomerase OS=Homo sapiens OX=9606 GN=HEL-S-269 PE=2 SV=1	FALSE	TRUE	11.2871	5	5	3	505	56.7	High	High	High	High	High	High		0.874	0.896	0.667	0.812333	0.126342	15.553	50.7	44.4	55.5	49.7	65.7	43.8	3	3	3	3	3	3	13.85
High	A8K5Y7	cDNA FLJ78655, highly similar to Homo sapiens exportin 5 (XPO5), mRNA OS=Homo sapiens OX=9606 PE=2 SV=1	FALSE	TRUE	4.31894	5	5	5	1204	136.2	High	High	High	High	High	High		0.824	1.146	0.469	0.813	0.338634	41.6524	91.2	75.1	63.6	72.9	116.1	54.5	4	4	4	4	4	4	14.41
High	O95218	Zinc finger Ran-binding domain-containing protein 2 OS=Homo sapiens OX=9606 GN=ZRANB2 PE=1 SV=2	FALSE	TRUE	16.9697	5	5	5	330	37.4	High	High	High	High	High	High		0.733	1.133	0.574	0.813333	0.288028	35.4133	78	57.1	63.8	72.3	106.2	61	3	3	3	3	3	3	13.9
High	P07195	L-lactate dehydrogenase B chain OS=Homo sapiens OX=9606 GN=LDHB PE=1 SV=2	FALSE	TRUE	14.6707	5	5	5	334	36.6	High	High	High	High	High	High		0.911	0.504	1.031	0.815333	0.276218	33.8779	107	97.5	186.2	93.8	131	135	4	4	4	4	4	4	5.89
High	P55786	Puromycin-sensitive aminopeptidase OS=Homo sapiens OX=9606 GN=NPEPPS PE=1 SV=2	FALSE	TRUE	6.09358	5	5	5	919	103.2	High	High	High	High	High	High		0.932	0.815	0.711	0.819333	0.110564	13.4943	37.8	35.3	39.9	32.5	47.4	33.7	2	2	2	2	2	2	10.77
High	A0A087WYN9	ATP-dependent RNA helicase DHX29 OS=Homo sapiens OX=9606 GN=DHX29 PE=1 SV=1	FALSE	TRUE	2.48175	5	5	5	1370	155.2	High	High	High	High	High	High		0.835	1.064	0.559	0.819333	0.252864	30.8622	102.1	85.3	77.2	82.2	121	67.6	3	3	3	3	3	3	12.65
High	Q53FI8	DNA-directed RNA polymerase III 39 kDa polypeptide F variant (Fragment) OS=Homo sapiens OX=9606 PE=2 SV=1	FALSE	TRUE	18.038	5	6	5	316	35.6	High	High	High	High	High	High		0.737	1.229	0.493	0.819667	0.374899	45.738	61.4	45.2	44.9	55.2	80.5	39.7	2	2	2	2	2	2	17.57
High	Q7Z5J4	Retinoic acid-induced protein 1 OS=Homo sapiens OX=9606 GN=RAI1 PE=1 SV=2	FALSE	TRUE	3.41028	5	6	5	1906	203.2	High	High	High	High	High	High		0.868	1.046	0.547	0.820333	0.252892	30.8279	43.3	37.6	36.8	38.5	60.5	33.1	3	3	3	3	3	3	17.1
High	A5PLN4	Splicing factor 4 OS=Homo sapiens OX=9606 GN=SF4 PE=2 SV=1	FALSE	TRUE	11.4729	5	5	5	645	72.5	High	High	High	High	High	High		0.79	1.135	0.54	0.821667	0.298761	36.3604	81.4	64.3	68.3	77.5	118.2	63.8	4	4	4	4	4	4	12.51
High	Q9BVM2	Protein DPCD OS=Homo sapiens OX=9606 GN=DPCD PE=1 SV=2	FALSE	TRUE	23.6453	5	6	5	203	23.2	High	High	High	High	High	High		0.886	1.032	0.548	0.822	0.248266	30.2027	104.3	92.4	89.7	92.6	142.6	78.2	5	5	5	5	5	5	12.54
High	Q15555	Microtubule-associated protein RP/EB family member 2 OS=Homo sapiens OX=9606 GN=MAPRE2 PE=1 SV=1	FALSE	TRUE	16.208	5	5	5	327	37	High	High	High	High	High	High		0.871	0.986	0.609	0.822	0.193217	23.5058	102.9	89.6	82.4	81.3	125.4	76.4	5	5	5	5	5	5	14.01
High	B2RE46	cDNA, FLJ96923, highly similar to Homo sapiens ribophorin II (RPN2), mRNA OS=Homo sapiens OX=9606 PE=2 SV=1	FALSE	TRUE	13.6292	5	7	5	631	69.3	High	High	High	High	High	High		0.898	0.994	0.577	0.823	0.218383	26.535	165.7	148.8	145.3	144.5	209.7	120.9	4	4	4	4	4	4	18.08
High	Q9NVH1	DnaJ homolog subfamily C member 11 OS=Homo sapiens OX=9606 GN=DNAJC11 PE=1 SV=2	FALSE	TRUE	9.66011	5	5	5	559	63.2	High	High	High	High	High	High		0.784	1.076	0.61	0.823333	0.235477	28.6004	64.4	50.5	55.8	60	87.6	53.4	4	4	4	4	4	4	13.02
High	Q01650	Large neutral amino acids transporter small subunit 1 OS=Homo sapiens OX=9606 GN=SLC7A5 PE=1 SV=2	FALSE	TRUE	11.8343	5	6	5	507	55	High	High	High	High	High	High		0.887	1.003	0.587	0.825667	0.214675	26.0002	161.1	142.8	126.3	126.7	230.7	135.5	5	5	5	5	5	5	19.94
High	A0A1K0GXZ1	Globin C1 OS=Homo sapiens OX=9606 GN=GLNC1 PE=3 SV=1	TRUE	TRUE	33.3333	5	10	5	177	19.2	High	High	High	High	High	High		0.711	0.874	0.893	0.826	0.100045	12.112	184.2	131	211.4	184.7	193.3	172.6	5	5	5	5	5	5	23.64
High	A0A140VJF4	Biliverdin reductase A OS=Homo sapiens OX=9606 PE=2 SV=1	FALSE	TRUE	17.9054	5	5	5	296	33.4	High	High	High	High	High	High		0.841	0.978	0.66	0.826333	0.159507	19.3029	94.2	79.2	82.6	80.8	115.4	76.2	3	3	3	3	3	3	11.77
High	Q70CQ2	Ubiquitin carboxyl-terminal hydrolase 34 OS=Homo sapiens OX=9606 GN=USP34 PE=1 SV=2	FALSE	TRUE	1.29724	5	5	5	3546	404	High	High	High	High	High	High		0.681	1.21	0.593	0.828	0.333735	40.3062	41.5	28.3	26.5	32.1	43.5	25.8	2	2	2	2	2	2	10.58
High	A0A0D9SEY1	Mitogen-activated protein kinase kinase kinase kinase 4, isoform CRA_a OS=Homo sapiens OX=9606 GN=MAP4K4 PE=1 SV=1	FALSE	TRUE	4.62121	5	6	2	1320	151	High	High	High	High	High	High		0.923	1.031	0.532	0.828667	0.262534	31.6815	31.3	28.9	25.9	26.7	42.3	22.5	1	1	1	1	1	1	10.69
High	A8K9K8	rRNA adenine N(6)-methyltransferase OS=Homo sapiens OX=9606 PE=2 SV=1	FALSE	TRUE	17.5719	5	6	5	313	35.2	High	High	High	High	High	High		0.859	1.043	0.585	0.829	0.230469	27.8009	88.9	76.4	75.8	79.1	110.4	64.6	3	3	3	3	3	3	14.72
High	Q6NUL7	SPTLC1 protein OS=Homo sapiens OX=9606 GN=SPTLC1 PE=2 SV=1	FALSE	TRUE	12.2807	5	7	5	513	57.4	High	High	High	High	High	High		0.913	0.993	0.618	0.841333	0.197505	23.4753	109.6	100.2	100.4	99.7	157.7	97.4	4	4	4	4	4	4	12.07
High	A0A024R5F7	7-dehydrocholesterol reductase isoform 1 OS=Homo sapiens OX=9606 GN=DHCR7 PE=2 SV=1	FALSE	TRUE	12	5	7	5	475	54.5	High	High	High	High	High	High		0.823	1.126	0.582	0.843667	0.272588	32.3099	60	49.3	48.3	54.4	77.1	44.9	2	2	2	2	2	2	16.32
High	A0A024RD36	Ribosomal protein L7-like 1, isoform CRA_b OS=Homo sapiens OX=9606 GN=RPL7L1 PE=4 SV=1	FALSE	TRUE	20	5	6	5	255	29.7	High	High	High	High	High	High		0.709	1.222	0.601	0.844	0.331782	39.3106	80.4	57	61.3	74.9	94.9	57	3	3	3	3	3	3	17.34
High	A0A2R8Y7H4	Ribose-phosphate pyrophosphokinase OS=Homo sapiens OX=9606 GN=PRPS1 PE=1 SV=1	FALSE	TRUE	21.1838	5	5	2	321	35.3	High	High	High	High	High	High		0.817	1.024	0.694	0.845	0.166772	19.7364	62.8	51.3	64	65.5	78.8	54.7	3	3	3	3	3	3	13.17
High	A0A024R0M6	Translocase of inner mitochondrial membrane 50 homolog (Yeast), isoform CRA_b OS=Homo sapiens OX=9606 GN=TIMM50 PE=4 SV=1	FALSE	TRUE	13.8158	5	6	5	456	50.4	High	High	High	High	High	High		0.87	1.039	0.629	0.846	0.206051	24.3559	46.8	40.7	33.5	34.8	59.6	37.5	2	2	2	2	2	2	16.84
High	Q9Y2T2	AP-3 complex subunit mu-1 OS=Homo sapiens OX=9606 GN=AP3M1 PE=1 SV=1	FALSE	TRUE	17.9426	5	7	5	418	46.9	High	High	High	High	High	High		0.824	1.114	0.6	0.846	0.257705	30.4616	134.8	111	106.4	118.6	180.7	108.4	4	4	4	4	4	4	22.43
High	B4DU42	cDNA FLJ56153, highly similar to Homo sapiens transforming growth factor beta regulator 4 (TBRG4), transcript variant 1, mRNA OS=Homo sapiens OX=9606 PE=2 SV=1	FALSE	TRUE	9.34579	5	5	5	642	71.8	High	High	High	High	High	High		0.792	1.157	0.592	0.847	0.286487	33.8238	218.2	172.8	159.6	184.6	287.3	170.1	4	4	4	4	4	4	10.86
High	Q96Q89	Kinesin-like protein KIF20B OS=Homo sapiens OX=9606 GN=KIF20B PE=1 SV=3	FALSE	TRUE	3.13187	5	5	5	1820	210.5	High	High	High	High	High	High		0.847	1.086	0.61	0.847667	0.238001	28.0772	110.4	93.5	97.2	105.5	150.1	91.5	4	4	4	4	4	4	13.8
High	B2R665	cDNA, FLJ92810, highly similar to Homo sapiens protein phosphatase 1G (formerly 2C), magnesium-dependent, gamma isoform (PPM1G), mRNA OS=Homo sapiens OX=9606 PE=2 SV=1	FALSE	TRUE	8.05861	5	5	5	546	59.2	High	High	High	High	High	High		0.749	1.181	0.615	0.848333	0.295786	34.8667	41.2	30.8	35.6	42.1	54	33.2	2	2	2	2	2	2	8.82
High	A0A024R4R9	Leukocyte receptor cluster (LRC) member 8, isoform CRA_a OS=Homo sapiens OX=9606 GN=LENG8 PE=4 SV=1	FALSE	TRUE	7.25	5	5	5	800	88.1	High	High	High	High	High	High		0.824	1.148	0.578	0.85	0.285888	33.6339	82.7	68.1	61.6	70.7	101.4	58.6	4	4	4	4	4	4	11.26
High	P27348	14-3-3 protein theta OS=Homo sapiens OX=9606 GN=YWHAQ PE=1 SV=1	FALSE	TRUE	23.6735	5	5	2	245	27.7	High	High	High	High	High	High		0.954	0.885	0.715	0.851333	0.123005	14.4486	44.6	42.5	63.8	56.5	76.4	54.6	3	3	3	3	3	3	11.62
High	A0A090N900	Ras homolog enriched in brain OS=Homo sapiens OX=9606 GN=RHEB PE=4 SV=1	FALSE	TRUE	28.8043	5	6	5	184	20.5	High	High	High	High	High	High		0.801	1.241	0.53	0.857333	0.358832	41.8544	72.6	58.1	52.5	65.2	94.1	49.9	4	4	4	4	4	4	14.38
High	Q8NE86	Calcium uniporter protein, mitochondrial OS=Homo sapiens OX=9606 GN=MCU PE=1 SV=1	FALSE	TRUE	15.3846	5	5	5	351	39.8	High	High	High	High	High	High		0.912	1.108	0.56	0.86	0.277676	32.2879	47.9	43.7	40	44.3	71.4	40	3	3	3	3	3	3	12.53
High	Q2M1J6	Oxidase (Cytochrome c) assembly 1-like OS=Homo sapiens OX=9606 GN=OXA1L PE=2 SV=1	FALSE	TRUE	10.6855	5	6	5	496	55.3	High	High	High	High	High	High		0.881	1.088	0.63	0.866333	0.229352	26.4739	132.6	116.8	102.5	111.6	165	104	4	4	4	4	4	4	16.15
High	Q8N4C8	Misshapen-like kinase 1 OS=Homo sapiens OX=9606 GN=MINK1 PE=1 SV=2	FALSE	TRUE	3.45345	5	5	2	1332	149.7	Medium	Medium	Medium	Medium	Medium	Medium		0.884	1.078	0.637	0.866333	0.22103	25.5133	64.1	56.7	56.7	61.1	82	52.2	3	3	3	3	3	3	7.69
High	Q5QJE6	Deoxynucleotidyltransferase terminal-interacting protein 2 OS=Homo sapiens OX=9606 GN=DNTTIP2 PE=1 SV=2	FALSE	TRUE	8.59788	5	5	5	756	84.4	High	High	High	High	High	High		0.717	1.279	0.605	0.867	0.36117	41.6575	64.7	46.4	46.4	59.3	76.2	46.1	4	4	4	4	4	4	11.73
High	Q6IAX2	RPL21 protein OS=Homo sapiens OX=9606 GN=RPL21 PE=2 SV=1	FALSE	TRUE	30.625	5	9	5	160	18.6	High	High	High	High	High	High		0.924	0.977	0.702	0.867667	0.145898	16.815	398	367.6	370.1	361.5	525.6	368.8	5	5	5	5	5	5	23.25
High	A6H8Y5	Nibrin OS=Homo sapiens OX=9606 GN=NBN PE=2 SV=1	FALSE	TRUE	6.6313	5	5	5	754	84.9	High	High	High	High	High	High		0.623	1.378	0.604	0.868333	0.441487	50.843	28.2	17.6	15.8	21.8	29.8	18	1	1	1	1	1	1	9.12
High	Q12872	Splicing factor, suppressor of white-apricot homolog OS=Homo sapiens OX=9606 GN=SFSWAP PE=1 SV=3	FALSE	TRUE	4.73186	5	5	5	951	104.8	High	High	High	High	High	High		0.959	1.051	0.597	0.869	0.240008	27.6189	12.3	11.8	17.1	18	23.3	13.9	1	1	1	1	1	1	7.14
High	A8K0S9	cDNA FLJ78311, highly similar to Homo sapiens spermatogenesis associated 2 (SPATA2), mRNA OS=Homo sapiens OX=9606 PE=2 SV=1	FALSE	TRUE	10.7692	5	6	5	520	58.5	High	High	High	High	High	High		0.842	1.225	0.541	0.869333	0.342818	39.4346	101.1	85.1	85.5	104.8	140	75.7	5	5	5	5	5	5	14.84
High	A0A1W2PNX8	Protein unc-45 homolog A OS=Homo sapiens OX=9606 GN=UNC45A PE=1 SV=1	FALSE	TRUE	5.81181	5	5	5	1084	118.3	High	High	High	High	High	High		0.924	0.989	0.71	0.874333	0.145981	16.6962	19.6	18.1	15.9	15.7	19.3	13.7	1	1	1	1	1	1	10
High	Q15645	Pachytene checkpoint protein 2 homolog OS=Homo sapiens OX=9606 GN=TRIP13 PE=1 SV=2	FALSE	TRUE	13.1944	5	5	5	432	48.5	High	High	High	High	High	High		0.724	1.288	0.611	0.874333	0.362674	41.48	93.2	67.5	64.5	83.1	121.3	74.1	4	4	4	4	4	4	11.59
High	A8K6V3	cDNA FLJ78677, highly similar to Homo sapiens splicing factor 3b, subunit 3, 130kDa (SF3B3), mRNA OS=Homo sapiens OX=9606 PE=2 SV=1	FALSE	TRUE	3.12243	5	5	5	1217	135.5	High	High	High	High	High	High		0.851	1.201	0.575	0.875667	0.313728	35.8273	85.9	73.2	70	84.1	105	60.4	4	4	4	4	4	4	5.28
High	O00193	Small acidic protein OS=Homo sapiens OX=9606 GN=SMAP PE=1 SV=1	FALSE	TRUE	24.0437	5	6	5	183	20.3	High	High	High	High	High	High		0.769	1.291	0.576	0.878667	0.3699	42.0979	211.9	163	161.2	208.1	280.1	161.3	3	3	3	3	3	3	12.46
High	A0A024R374	Cathepsin B, isoform CRA_a OS=Homo sapiens OX=9606 GN=CTSB PE=3 SV=1	FALSE	TRUE	21.2389	5	5	5	339	37.8	High	High	High	High	High	High		0.873	1.107	0.658	0.879333	0.224567	25.5383	59.1	51.6	43.9	48.6	75.7	49.8	3	3	3	3	3	3	14.45
High	A8K486	Peptidyl-prolyl cis-trans isomerase OS=Homo sapiens OX=9606 PE=2 SV=1	TRUE	TRUE	28.4848	5	6	5	165	18	High	High	High	High	High	High		1.05	0.813	0.781	0.881333	0.146943	16.6728	129.6	136.1	154.5	125.5	165.2	129	4	4	4	4	4	4	15.51
High	Q8TA92	Similar to AFG3 ATPase family gene 3-like 2 (Yeast) (Fragment) OS=Homo sapiens OX=9606 PE=2 SV=1	FALSE	TRUE	8.00493	5	5	5	812	90.1	High	High	High	High	High	High		0.981	1.096	0.568	0.881667	0.277662	31.4929	27.6	27.1	26.8	29.4	37.7	21.4	2	2	2	2	2	2	12.19
High	Q13118	Krueppel-like factor 10 OS=Homo sapiens OX=9606 GN=KLF10 PE=1 SV=1	FALSE	TRUE	11.4583	5	6	5	480	52.5	High	High	High	High	High	High		0.963	1.066	0.621	0.883333	0.232951	26.3719	108.4	104.4	106.7	113.7	162.6	100.9	4	4	4	4	4	4	13.77
High	Q96JP5	E3 ubiquitin-protein ligase ZFP91 OS=Homo sapiens OX=9606 GN=ZFP91 PE=1 SV=1	FALSE	TRUE	10	5	6	5	570	63.4	High	High	High	High	High	High		0.769	1.315	0.578	0.887333	0.382484	43.1049	194.4	149.5	140.3	184.5	251.7	145.5	3	3	3	3	3	3	11.93
High	P10599	Thioredoxin OS=Homo sapiens OX=9606 GN=TXN PE=1 SV=3	TRUE	TRUE	49.5238	5	13	5	105	11.7	High	High	High	High	High	High		0.927	1.324	0.414	0.888333	0.456231	51.358	351.3	325.7	267.2	353.9	508.7	210.5	5	5	5	5	5	5	28.19
High	A8K032	Translocating chain-associated membrane protein OS=Homo sapiens OX=9606 PE=2 SV=1	FALSE	TRUE	12.8342	5	6	5	374	43	High	High	High	High	High	High		1.032	1.056	0.585	0.891	0.265275	29.7728	62.4	64.4	60.3	63.7	90.4	52.9	2	2	2	2	2	2	10.62
High	A0A024R7U9	V-type proton ATPase subunit H OS=Homo sapiens OX=9606 GN=ATP6V1H PE=3 SV=1	FALSE	TRUE	11.3872	5	5	5	483	55.8	High	High	High	High	High	High		1.036	1.1	0.538	0.891333	0.307664	34.5173	32.7	33.9	27.1	29.8	42.9	23.1	2	2	2	2	2	2	8.22
High	Q5JWF2	Guanine nucleotide-binding protein G(s) subunit alpha isoforms XLas OS=Homo sapiens OX=9606 GN=GNAS PE=1 SV=2	FALSE	TRUE	4.72517	5	7	4	1037	111	High	High	High	High	High	High		0.876	1.042	0.76	0.892667	0.141737	15.8779	174.1	152.5	145	151	199.5	151.6	5	5	5	5	5	5	17.19
High	D3DUZ3	Interferon, gamma-inducible protein 16, isoform CRA_a OS=Homo sapiens OX=9606 GN=IFI16 PE=4 SV=1	FALSE	TRUE	7.77626	5	5	4	733	82.4	High	High	High	High	High	High		0.851	1.278	0.572	0.900333	0.355576	39.4938	60.8	51.7	44.6	57	85.8	49.1	3	3	3	3	3	3	14.42
High	Q9Y388	RNA-binding motif protein, X-linked 2 OS=Homo sapiens OX=9606 GN=RBMX2 PE=1 SV=2	FALSE	TRUE	15.8385	5	7	5	322	37.3	High	High	High	High	High	High		0.845	1.228	0.629	0.900667	0.303355	33.6812	127.4	107.7	91.9	112.8	161.6	101.6	3	3	3	3	3	3	15.15
High	P21283	V-type proton ATPase subunit C 1 OS=Homo sapiens OX=9606 GN=ATP6V1C1 PE=1 SV=4	FALSE	TRUE	12.3037	5	5	5	382	43.9	High	High	High	High	High	High		0.943	1.054	0.706	0.901	0.177761	19.7293	59.8	56.4	58.8	62	78.1	55.1	2	2	2	2	2	2	10.18
High	Q08378	Golgin subfamily A member 3 OS=Homo sapiens OX=9606 GN=GOLGA3 PE=1 SV=2	FALSE	TRUE	2.46996	5	5	4	1498	167.3	High	High	High	High	High	High		0.891	1.12	0.735	0.915333	0.19365	21.1562	34.2	30.5	26.1	29.2	32.8	24.1	2	2	2	2	2	2	8.72
High	P49841	Glycogen synthase kinase-3 beta OS=Homo sapiens OX=9606 GN=GSK3B PE=1 SV=2	FALSE	TRUE	17.619	5	5	3	420	46.7	High	High	High	High	High	High		0.89	1.253	0.64	0.927667	0.308231	33.2265	83.3	74.1	65.8	82.4	101.5	65	3	3	3	3	3	3	15.28
High	P50613	Cyclin-dependent kinase 7 OS=Homo sapiens OX=9606 GN=CDK7 PE=1 SV=1	FALSE	TRUE	15.6069	5	6	5	346	39	High	High	High	High	High	High		0.84	1.45	0.497	0.929	0.482693	51.9584	99	83.2	68.3	99	144.2	71.6	4	4	4	4	4	4	15.83
High	Q5HYJ3	Protein FAM76B OS=Homo sapiens OX=9606 GN=FAM76B PE=1 SV=3	FALSE	TRUE	11.7994	5	5	4	339	38.7	High	High	High	High	High	High		0.756	1.395	0.643	0.931333	0.405503	43.54	140.2	106	94.2	131.4	167.3	107.5	4	4	4	4	4	4	9.32
High	Q96DT7	Zinc finger and BTB domain-containing protein 10 OS=Homo sapiens OX=9606 GN=ZBTB10 PE=1 SV=2	FALSE	TRUE	5.85534	5	5	4	871	94.8	High	High	High	High	High	High		0.942	1.318	0.541	0.933667	0.388567	41.6173	46.2	43.6	40.6	53.5	61.7	33.4	3	3	3	3	3	3	12.81
High	A0A0S2Z537	E3 ubiquitin protein ligase (Fragment) OS=Homo sapiens OX=9606 GN=RNF40 PE=2 SV=1	FALSE	TRUE	4.3956	5	6	3	1001	113.6	High	High	High	High	High	High		1.037	1.044	0.724	0.935	0.182765	19.547	23.9	24.8	24.1	25.2	30.1	21.8	1	1	1	1	1	1	14.27
High	Q9BU76	Multiple myeloma tumor-associated protein 2 OS=Homo sapiens OX=9606 GN=MMTAG2 PE=1 SV=1	FALSE	TRUE	21.2928	5	5	5	263	29.4	High	High	High	High	High	High		0.844	1.238	0.724	0.935333	0.268897	28.7487	73.5	62	56.9	70.5	93	67.3	3	3	3	3	3	3	13.26
High	P50453	Serpin B9 OS=Homo sapiens OX=9606 GN=SERPINB9 PE=1 SV=1	FALSE	TRUE	19.1489	5	5	5	376	42.4	High	High	High	High	High	High		1.042	1.059	0.717	0.939333	0.192734	20.5182	18.8	19.6	20.7	21.9	28.3	20.3	2	2	2	2	2	2	13.35
High	B2RAN0	cDNA, FLJ95010, highly similar to Homo sapiens Bloom syndrome (BLM), mRNA OS=Homo sapiens OX=9606 PE=2 SV=1	FALSE	TRUE	4.37544	5	5	4	1417	158.9	High	High	High	High	High	High		0.732	1.442	0.681	0.951667	0.425406	44.7012	16.5	12.1	12	17.3	16.6	11.3	1	1	1	1	1	1	14.42
High	G3V203	60S ribosomal protein L18 OS=Homo sapiens OX=9606 GN=RPL18 PE=1 SV=1	FALSE	TRUE	31.0976	5	7	1	164	18.7	High	High	High	High	High	High		0.802	1.453	0.616	0.957	0.439501	45.9249	27.6	22.1	18.9	27.5	40.1	24.7	1	1	1	1	1	1	17.23
High	V9HWA6	Epididymis luminal protein 32 OS=Homo sapiens OX=9606 GN=HEL32 PE=2 SV=1	FALSE	TRUE	28.4848	5	6	4	165	18.5	High	High	High	High	High	High		0.972	1.105	0.807	0.961333	0.149286	15.5291	66.7	64.9	61.5	67.9	80.8	65.2	3	3	3	3	3	3	16.84
High	Q15182	Small nuclear ribonucleoprotein-associated protein OS=Homo sapiens OX=9606 GN=SNRPB PE=2 SV=1	FALSE	TRUE	17.5439	5	9	5	285	29.7	High	High	High	High	High	High		0.899	1.265	0.722	0.962	0.276928	28.7867	200.5	180.3	169.9	214.9	271.1	195.8	4	4	4	4	4	4	26.29
High	Q9NW64	Pre-mRNA-splicing factor RBM22 OS=Homo sapiens OX=9606 GN=RBM22 PE=1 SV=1	FALSE	TRUE	9.52381	5	5	5	420	46.9	High	High	High	High	High	High		0.865	1.394	0.642	0.967	0.386237	39.9418	138.9	120.1	106.3	148.2	181.8	116.8	4	4	4	4	4	4	15.94
High	A8K800	cDNA FLJ76924, highly similar to Homo sapiens brix domain containing 1 (BXDC1), mRNA OS=Homo sapiens OX=9606 PE=2 SV=1	FALSE	TRUE	16.0131	5	5	5	306	35.6	High	High	High	High	High	High		0.913	1.176	0.813	0.967333	0.1875	19.3832	68.9	62.9	63.5	74.6	87.1	70.8	4	4	4	4	4	4	12.58
High	A0A087WU53	Magnesium transporter protein 1 OS=Homo sapiens OX=9606 GN=MAGT1 PE=1 SV=1	FALSE	TRUE	11.9891	5	5	5	367	41.5	High	High	High	High	High	High		1.107	1.156	0.668	0.977	0.268721	27.5047	50.1	55.4	48.2	55.7	73.7	49.2	3	3	3	3	3	3	13.18
High	A8K2W7	cDNA FLJ78119, highly similar to Homo sapiens G1 to S phase transition 1 (GSPT1), mRNA OS=Homo sapiens OX=9606 PE=2 SV=1	FALSE	TRUE	9.21844	5	5	5	499	55.7	High	High	High	High	High	High		1.08	1.315	0.558	0.984333	0.387461	39.3628	112.4	121.4	103.5	136.1	174	97.1	4	4	4	4	4	4	13.41
High	A8K1B1	cDNA FLJ75211, highly similar to Homo sapiens ubiquitin specific peptidase like 1, mRNA OS=Homo sapiens OX=9606 PE=2 SV=1	FALSE	TRUE	6.41026	5	5	5	1092	120.3	High	High	High	High	High	High		0.755	1.389	0.831	0.991667	0.346193	34.9102	16	12.1	10.8	15	16.6	13.8	1	1	1	1	1	1	12.57
High	B4DYZ7	cDNA FLJ54316, highly similar to DNA polymerase subunit delta 3 OS=Homo sapiens OX=9606 PE=2 SV=1	FALSE	TRUE	9.65665	5	5	5	466	51.3	High	High	High	High	High	High		0.878	1.371	0.735	0.994667	0.333665	33.5454	14	12.3	9.4	12.9	16.6	12.2	1	1	1	1	1	1	10.27
High	A0A0S2Z410	Hydroxysteroid dehydrogenase 10 isoform 1 (Fragment) OS=Homo sapiens OX=9606 GN=HSD17B10 PE=2 SV=1	FALSE	TRUE	22.2222	5	5	5	261	26.9	High	High	High	High	High	High		1.042	1.393	0.615	1.01667	0.389618	38.3231	45.1	47	47.3	65.9	86.4	53.1	4	4	4	4	4	4	15.14
High	P61927	60S ribosomal protein L37 OS=Homo sapiens OX=9606 GN=RPL37 PE=1 SV=2	FALSE	TRUE	34.0206	5	5	5	97	11.1	High	High	High	High	High	High		1.082	1.163	0.821	1.022	0.17872	17.4873	160.3	173.4	136.1	158.2	186.2	152.8	4	4	4	4	4	4	2.47
High	P49915	GMP synthase [glutamine-hydrolyzing] OS=Homo sapiens OX=9606 GN=GMPS PE=1 SV=1	FALSE	TRUE	8.22511	5	5	5	693	76.7	High	High	High	High	High	High		0.894	1.349	0.83	1.02433	0.282985	27.6262	64.2	57.4	51.1	68.9	80.4	66.7	3	3	3	3	3	3	11.63
High	Q6NW34	Nucleolus and neural progenitor protein OS=Homo sapiens OX=9606 GN=NEPRO PE=1 SV=3	FALSE	TRUE	7.58377	5	5	5	567	64.5	High	High	High	High	High	High		1.118	1.236	0.737	1.03033	0.260796	25.3118	48	53.7	42	51.9	62.3	45.9	3	3	3	3	3	3	12.26
High	B8ZZN6	Small ubiquitin-related modifier 1 OS=Homo sapiens OX=9606 GN=SUMO1 PE=1 SV=1	TRUE	TRUE	32.8767	5	5	5	146	16.6	High	High	High	High	High	High	Met-loss+Acetyl [N-Term]	0.885	1.381	0.831	1.03233	0.303159	29.3664	87.4	77.4	69.2	95.6	107.2	89.1	4	4	4	4	4	4	10.63
High	A0A140VJC9	Lysophospholipase II, isoform CRA_f OS=Homo sapiens OX=9606 GN=LYPLA2 PE=2 SV=1	FALSE	TRUE	33.7662	5	5	5	231	24.7	High	High	High	High	High	High		1.054	1.206	0.847	1.03567	0.180201	17.3995	78.8	83	65.2	78.6	89.4	75.7	2	2	2	2	2	2	16.39
High	A0A024QZW7	Nucleoporin 153kDa, isoform CRA_a OS=Homo sapiens OX=9606 GN=NUP153 PE=4 SV=1	FALSE	TRUE	3.66102	5	5	5	1475	153.9	High	High	High	High	High	High		0.77	1.383	0.963	1.03867	0.313427	30.1759	30.2	23.2	20.6	28.5	29.6	28.5	2	2	2	2	2	2	10.86
High	J3QQ67	60S ribosomal protein L18 (Fragment) OS=Homo sapiens OX=9606 GN=RPL18 PE=1 SV=1	FALSE	TRUE	28.9474	5	8	1	190	21.8	High	High	High	High	High	High		1.127	1.161	0.832	1.04	0.180934	17.3975	181	204.1	163.8	190.2	225.4	187.5	5	5	5	5	5	5	19.75
High	O75179	Ankyrin repeat domain-containing protein 17 OS=Homo sapiens OX=9606 GN=ANKRD17 PE=1 SV=3	FALSE	TRUE	1.84403	5	5	5	2603	274.1	High	High	High	High	High	High		0.951	1.189	0.991	1.04367	0.127441	12.2109	25	23.8	25.1	29.9	23.1	22.9	2	2	2	2	2	2	8.69
High	A8MXP9	Matrin-3 OS=Homo sapiens OX=9606 GN=MATR3 PE=1 SV=1	FALSE	TRUE	4.58101	5	5	5	895	99.9	High	High	High	High	High	High		0.866	1.647	0.624	1.04567	0.534642	51.1293	12.9	11.2	8	13.2	16.5	10.3	1	1	1	1	1	1	12.99
High	Q7Z7K6	Centromere protein V OS=Homo sapiens OX=9606 GN=CENPV PE=1 SV=1	FALSE	TRUE	24	5	5	5	275	29.9	High	High	High	High	High	High		0.789	1.26	1.137	1.062	0.244293	23.0031	101.9	80.5	103.3	130.2	105.5	120	4	4	4	4	4	4	11.88
High	O43252	Bifunctional 3'-phosphoadenosine 5'-phosphosulfate synthase 1 OS=Homo sapiens OX=9606 GN=PAPSS1 PE=1 SV=2	FALSE	TRUE	10.0962	5	5	5	624	70.8	High	High	High	High	High	High		0.704	1.805	0.791	1.1	0.612096	55.6451	16	11.3	9.2	16.6	18.2	14.4	1	1	1	1	1	1	12.72
High	A0A087X0H9	RNA-binding protein 26 OS=Homo sapiens OX=9606 GN=RBM26 PE=1 SV=1	FALSE	TRUE	4.65808	5	5	5	1009	113.7	High	High	High	High	High	High		1.147	1.623	0.653	1.141	0.485028	42.509	27.9	32.1	22.1	35.9	38.3	25	2	2	2	2	2	2	6.63
High	Q9BTC8	Metastasis-associated protein MTA3 OS=Homo sapiens OX=9606 GN=MTA3 PE=1 SV=2	FALSE	TRUE	6.39731	5	5	1	594	67.5	High	High	High	High	High	High		0.907	1.894	0.787	1.196	0.607456	50.7906	13.4	12.2	9.7	18.4	16.4	12.9	1	1	1	1	1	1	11.6
High	A0A1U9X8F1	RING1 OS=Homo sapiens OX=9606 PE=4 SV=1	FALSE	TRUE	20.6897	5	5	5	406	42.3	High	High	High	High	High	High		1.017	1.899	0.694	1.20333	0.623736	51.834	19.3	19.6	13.4	25.4	24.8	17.2	1	1	1	1	1	1	15.95
High	A0A024R2B6	Serpin peptidase inhibitor, clade B (Ovalbumin), member 5, isoform CRA_b OS=Homo sapiens OX=9606 GN=SERPINB5 PE=3 SV=1	FALSE	TRUE	18.6667	5	5	5	375	42.1	High	High	High	High	High	High		0.79	3.244	0.577	1.537	1.48214	96.4305	45.9	36.2	37.3	121	61.4	35.4	3	3	3	3	3	3	9.76
High	Q0IIN1	Keratin 77 OS=Homo sapiens OX=9606 GN=KRT77 PE=1 SV=1	TRUE	TRUE	6.7474	5	16	1	578	61.8	High	High	High	High	High	High		1.595	0.853	2.42	1.62267	0.783866	48.3073	2.2	3.5	19	16.2	8.8	21.3	1	1	1	1	1	1	41.89
High	H3BS72	Very-long-chain (3R)-3-hydroxyacyl-CoA dehydratase OS=Homo sapiens OX=9606 GN=HACD3 PE=1 SV=1	FALSE	TRUE	12.25	5	6	5	400	47.1	High	High	High	High	High	High		4.712	0.702	0.506	1.97333	2.37378	120.293	101	475.8	103	72.3	123.5	62.5	3	3	3	3	3	3	14.34
High	Q8WUH6	Transmembrane protein 263 OS=Homo sapiens OX=9606 GN=TMEM263 PE=1 SV=1	FALSE	TRUE	65.5172	5	11	5	116	11.7	High	High	High	High	High	High		0.883	1.84	5.827	2.85	2.62219	92.0065	130.6	115.2	130.9	240.8	115.4	672.4	7	7	7	7	7	7	24.65
High	P02662	Alpha-S1-casein OS=Bos taurus GN=CSN1S1 PE=1 SV=2	TRUE	FALSE	29.4393	5	7	5	214	24.5	High	High	High	High	High	High		5.337	1.309	3.964	3.53667	2.04772	57.8997	57.8	308.3	63.9	83.7	81.6	323.5	3	3	3	3	3	3	21.67
High	A6NFM0	DNA-directed RNA polymerase II subunit RPB11-b1 OS=Homo sapiens OX=9606 GN=POLR2J2 PE=4 SV=1	FALSE	TRUE	25.9494	5	12	1	158	17.2	High	High	High	High	High	High					#DIV/0!	#DIV/0!	#DIV/0!													23.32
High	F8W7C6	60S ribosomal protein L10 OS=Homo sapiens OX=9606 GN=RPL10 PE=1 SV=2	FALSE	TRUE	34.9693	5	6	1	163	18.6	High	High	High	High	High	High					#DIV/0!	#DIV/0!	#DIV/0!													14.74
High	Q92526	T-complex protein 1 subunit zeta-2 OS=Homo sapiens OX=9606 GN=CCT6B PE=1 SV=5	FALSE	TRUE	10	5	7	1	530	57.8	Medium	Medium	Medium	Medium	Medium	Medium					#DIV/0!	#DIV/0!	#DIV/0!													15.69
High	Q9UHB9	Signal recognition particle subunit SRP68 OS=Homo sapiens OX=9606 GN=SRP68 PE=1 SV=2	FALSE	TRUE	12.9187	5	5	5	627	70.7	High	High	High	High	High	High					#DIV/0!	#DIV/0!	#DIV/0!													9.09
High	Q14571	Inositol 1,4,5-trisphosphate receptor type 2 OS=Homo sapiens OX=9606 GN=ITPR2 PE=1 SV=2	FALSE	TRUE	1.592	5	5	1	2701	307.9	High	High	High	High	High	High					#DIV/0!	#DIV/0!	#DIV/0!													11.31
High	Q58EY4	SWI/SNF related, matrix associated, actin dependent regulator of chromatin, subfamily c, member 1 OS=Homo sapiens OX=9606 GN=SMARCC1 PE=2 SV=1	FALSE	TRUE	6.24434	5	6	2	1105	122.8	High	High	High	High	High	High					#DIV/0!	#DIV/0!	#DIV/0!													12.14
High	O94973	AP-2 complex subunit alpha-2 OS=Homo sapiens OX=9606 GN=AP2A2 PE=1 SV=2	FALSE	TRUE	4.47284	5	5	1	939	103.9	High	High	High	High	High	High					#DIV/0!	#DIV/0!	#DIV/0!													12.14
High	E5KS55	Succinate--CoA ligase [ADP-forming] subunit beta, mitochondrial OS=Homo sapiens OX=9606 GN=SUCLA2 PE=3 SV=1	FALSE	TRUE	14.6868	5	5	5	463	50.3	High	High	High	High	High	High					#DIV/0!	#DIV/0!	#DIV/0!													9.81
High	Q96T37	RNA-binding protein 15 OS=Homo sapiens OX=9606 GN=RBM15 PE=1 SV=2	FALSE	TRUE	5.73183	5	5	5	977	107.1	High	High	High	High	High	High					#DIV/0!	#DIV/0!	#DIV/0!													9.95
High	A0A024RDF3	Heterogeneous nuclear ribonucleoprotein D (AU-rich element RNA binding protein 1, 37kDa), isoform CRA_d OS=Homo sapiens OX=9606 GN=HNRPD PE=4 SV=1	FALSE	TRUE	12.1127	4	4	4	355	38.4	High	High	High	High	High	High		0.766	0.92	0.422	0.702667	0.254969	36.286	58.9	45.1	48	44.2	84.1	35.5	2	2	2	2	2	2	7.99
High	P46937	Transcriptional coactivator YAP1 OS=Homo sapiens OX=9606 GN=YAP1 PE=1 SV=2	FALSE	TRUE	18.254	4	4	4	504	54.4	High	High	High	High	High	High		0.655	1.067	0.411	0.711	0.331566	46.6338	20.6	13.5	12.5	13.3	26.5	10.9	1	1	1	1	1	1	15.15
High	O60716	Catenin delta-1 OS=Homo sapiens OX=9606 GN=CTNND1 PE=1 SV=1	FALSE	TRUE	3.6157	4	4	4	968	108.1	High	High	High	High	High	High		0.74	0.889	0.518	0.715667	0.186693	26.0866	124.9	92.4	85.8	76.3	149.5	77.4	3	3	3	3	3	3	7.93
High	Q9Y4B6	DDB1- and CUL4-associated factor 1 OS=Homo sapiens OX=9606 GN=DCAF1 PE=1 SV=3	FALSE	TRUE	2.72064	4	4	4	1507	168.9	High	High	High	High	High	High		0.717	0.922	0.533	0.724	0.194594	26.8777	107.8	77.3	85.9	79.2	123.5	65.8	3	3	3	3	3	3	6.83
High	Q12788	Transducin beta-like protein 3 OS=Homo sapiens OX=9606 GN=TBL3 PE=1 SV=2	FALSE	TRUE	9.28218	4	4	4	808	89	High	High	High	High	High	High		0.829	0.906	0.453	0.729333	0.242389	33.2343	14	11.6	12.8	11.6	17.2	7.8	1	1	1	1	1	1	11.39
High	P51571	Translocon-associated protein subunit delta OS=Homo sapiens OX=9606 GN=SSR4 PE=1 SV=1	FALSE	TRUE	25.4335	4	7	4	173	19	High	High	High	High	High	High		0.753	0.944	0.5	0.732333	0.22272	30.4124	101.9	76.8	89.4	84.4	140.6	70.3	3	3	3	3	3	3	19.56
High	F8W0Q9	Periphilin-1 OS=Homo sapiens OX=9606 GN=PPHLN1 PE=1 SV=1	FALSE	TRUE	10.9091	4	5	4	385	44.7	High	High	High	High	High	High		0.691	1.072	0.455	0.739333	0.311327	42.1091	70.7	48.8	51.8	55.6	87.7	39.9	2	2	2	2	2	2	10.16
High	E7EX29	14-3-3 protein zeta/delta (Fragment) OS=Homo sapiens OX=9606 GN=YWHAZ PE=1 SV=1	FALSE	TRUE	15.8537	4	4	1	246	28	High	High	High	High	High	High		0.727	0.588	0.932	0.749	0.173052	23.1044	12.3	8.9	20.9	12.3	17.6	16.4	1	1	1	1	1	1	9.71
High	Q03111	Protein ENL OS=Homo sapiens OX=9606 GN=MLLT1 PE=1 SV=2	FALSE	TRUE	8.05009	4	4	4	559	62	High	High	High	High	High	High		0.563	1.165	0.528	0.752	0.358096	47.6192	75.8	42.7	55	64.1	102.6	54.2	3	3	3	3	3	3	12.48
High	A0A024R0R4	SUMO-1 activating enzyme subunit 1, isoform CRA_b OS=Homo sapiens OX=9606 GN=SAE1 PE=4 SV=1	FALSE	TRUE	10.9827	4	4	4	346	38.4	High	High	High	High	High	High		0.84	0.962	0.467	0.756333	0.257888	34.0972	41.8	35.1	38	36.6	55.9	26.1	2	2	2	2	2	2	10.08
High	O95831	Apoptosis-inducing factor 1, mitochondrial OS=Homo sapiens OX=9606 GN=AIFM1 PE=1 SV=1	FALSE	TRUE	5.87276	4	4	4	613	66.9	High	High	High	High	High	High		0.669	1.079	0.522	0.756667	0.288663	38.1493	74.9	50.1	45.6	49.2	77.8	40.6	3	3	3	3	3	3	9.38
High	A0A024R0X0	AP1 gamma subunit binding protein 1, isoform CRA_d OS=Homo sapiens OX=9606 GN=AP1GBP1 PE=4 SV=1	FALSE	TRUE	3.12024	4	4	4	1314	140.6	High	High	High	High	High	High		0.644	1.164	0.473	0.760333	0.359889	47.3331	19.4	12.5	13	15.1	26	12.3	1	1	1	1	1	1	10.98
High	P51991	Heterogeneous nuclear ribonucleoprotein A3 OS=Homo sapiens OX=9606 GN=HNRNPA3 PE=1 SV=2	FALSE	TRUE	7.93651	4	7	1	378	39.6	Medium	Medium	Medium	Medium	Medium	Medium		0.747	1.023	0.516	0.762	0.253833	33.3114	48.3	36.1	43.4	44.4	80	41.3	1	1	1	1	1	1	15.42
High	A0A024RE02	Phosphoglycerate dehydrogenase like 1, isoform CRA_c OS=Homo sapiens OX=9606 GN=PHGDHL1 PE=4 SV=1	FALSE	TRUE	14.2442	4	4	4	344	38.9	High	High	High	High	High	High		0.751	0.892	0.647	0.763333	0.122965	16.1089	15.2	11.4	12	10.7	17.3	11.2	1	1	1	1	1	1	10.41
High	B4DJ38	cDNA FLJ56092, highly similar to Pentatricopeptide repeat protein 1 OS=Homo sapiens OX=9606 PE=2 SV=1	FALSE	TRUE	5.47397	4	4	4	749	84.1	High	High	High	High	High	High		0.867	0.898	0.528	0.764333	0.205257	26.8544	74.1	64.2	64.1	57.6	102.6	54.2	4	4	4	4	4	4	11.59
High	P61006	Ras-related protein Rab-8A OS=Homo sapiens OX=9606 GN=RAB8A PE=1 SV=1	FALSE	TRUE	17.8744	4	4	1	207	23.7	High	High	High	High	High	High		0.894	0.594	0.815	0.767667	0.1555	20.2562	63	56.3	88.4	52.5	80.9	65.9	3	3	3	3	3	3	9.66
High	Q9GZR1	Sentrin-specific protease 6 OS=Homo sapiens OX=9606 GN=SENP6 PE=1 SV=2	FALSE	TRUE	3.68705	4	4	4	1112	126.1	High	High	High	High	High	High		0.676	1.08	0.562	0.772667	0.272194	35.2278	39	26.4	33	35.7	47.9	26.9	2	2	2	2	2	2	9.98
High	Q9H5V9	UPF0428 protein CXorf56 OS=Homo sapiens OX=9606 GN=CXorf56 PE=1 SV=1	FALSE	TRUE	20.7207	4	4	4	222	25.6	High	High	High	High	High	High		0.626	1.194	0.518	0.779333	0.363149	46.5974	25.2	15.8	18.3	21.9	28.2	14.6	2	2	2	2	2	2	11.61
High	Q14019	Coactosin-like protein OS=Homo sapiens OX=9606 GN=COTL1 PE=1 SV=3	FALSE	TRUE	37.3239	4	5	4	142	15.9	High	High	High	High	High	High		0.869	0.855	0.618	0.780667	0.141047	18.0675	120.3	104.5	116.6	99.7	156.4	96.6	4	4	4	4	4	4	13.75
High	B2R7E8	cDNA, FLJ93412, highly similar to Homo sapiens replication protein A2, 32kDa (RPA2), mRNA OS=Homo sapiens OX=9606 PE=2 SV=1	FALSE	TRUE	20	4	4	4	270	29.2	High	High	High	High	High	High		0.667	1.121	0.557	0.781667	0.298974	38.2482	76.9	51.3	56.1	62.9	93.2	51.9	4	4	4	4	4	4	11.84
High	O43772	Mitochondrial carnitine/acylcarnitine carrier protein OS=Homo sapiens OX=9606 GN=SLC25A20 PE=1 SV=1	FALSE	TRUE	12.2924	4	4	4	301	32.9	High	High	High	High	High	High		0.691	1.006	0.656	0.784333	0.192765	24.5769	55.6	38.4	43.5	43.8	67.1	44	3	3	3	3	3	3	9.43
High	A0A087X2I1	26S proteasome regulatory subunit 10B OS=Homo sapiens OX=9606 GN=PSMC6 PE=1 SV=1	FALSE	TRUE	10.67	4	5	4	403	45.8	High	High	High	High	High	High		0.815	1.025	0.517	0.785667	0.255267	32.4905	71.4	58.2	58.9	60.4	96.1	49.7	3	3	3	3	3	3	12.48
High	Q6MZT3	Uncharacterized protein DKFZp686C1054 OS=Homo sapiens OX=9606 GN=DKFZp686C1054 PE=2 SV=1	FALSE	TRUE	9.11162	4	6	4	439	48.5	High	High	High	High	High	High		0.907	0.824	0.642	0.791	0.135547	17.1362	46.7	42.4	43.7	36	53.6	34.4	2	2	2	2	2	2	10.79
High	A0A024R254	Melanoma antigen family D, 1, isoform CRA_a OS=Homo sapiens OX=9606 GN=MAGED1 PE=4 SV=1	FALSE	TRUE	4.24165	4	4	3	778	86.1	High	High	High	High	High	High		0.833	0.978	0.576	0.795667	0.203584	25.5866	42.6	35.5	32.9	32.2	50	28.8	2	2	2	2	2	2	9.62
High	O14735	CDP-diacylglycerol--inositol 3-phosphatidyltransferase OS=Homo sapiens OX=9606 GN=CDIPT PE=1 SV=1	FALSE	TRUE	19.2488	4	4	4	213	23.5	High	High	High	High	High	High		0.84	0.93	0.622	0.797333	0.158371	19.8626	62.3	52.3	62.8	58.4	79.8	49.6	2	2	2	2	2	2	9.32
High	J3KR97	Tubulin-specific chaperone D OS=Homo sapiens OX=9606 GN=TBCD PE=1 SV=1	FALSE	TRUE	4.71545	4	4	4	1230	136.5	High	High	High	High	High	High		0.794	1.07	0.529	0.797667	0.270519	33.9137	56.3	44.7	35.3	37.8	67.5	35.7	3	3	3	3	3	3	10.1
High	B5BUB1	RuvB-like helicase (Fragment) OS=Homo sapiens OX=9606 GN=RUVBL1 PE=2 SV=1	FALSE	TRUE	10.5263	4	5	4	456	50.2	High	High	High	High	High	High		0.778	0.948	0.668	0.798	0.141067	17.6776	25.7	20	19.7	18.7	32.2	21.5	2	2	2	2	2	2	15.02
High	P51570	Galactokinase OS=Homo sapiens OX=9606 GN=GALK1 PE=1 SV=1	FALSE	TRUE	12.7551	4	4	4	392	42.2	High	High	High	High	High	High		0.779	1.042	0.574	0.798333	0.234598	29.386	98.7	76.9	89	92.7	137	78.6	4	4	4	4	4	4	13.76
High	A0A024R8D4	Mitochondrial ribosomal protein S2, isoform CRA_a OS=Homo sapiens OX=9606 GN=MRPS2 PE=3 SV=1	FALSE	TRUE	9.09091	4	4	4	319	35.5	High	High	High	High	High	High		0.69	1.061	0.646	0.799	0.227963	28.531	95.4	65.9	64.6	68.5	100.6	65	4	4	4	4	4	4	6.42
High	Q7KZI7	Serine/threonine-protein kinase MARK2 OS=Homo sapiens OX=9606 GN=MARK2 PE=1 SV=2	FALSE	TRUE	5.20305	4	4	4	788	87.9	High	High	High	High	High	High		0.721	1.041	0.636	0.799333	0.213561	26.7174	60.9	43.9	41.6	43.3	69.2	44	3	3	3	3	3	3	8.86
High	Q59GY0	Apolipoprotein B mRNA editing enzyme, catalytic polypeptide-like 3C variant (Fragment) OS=Homo sapiens OX=9606 PE=2 SV=1	FALSE	TRUE	26.4151	4	6	3	212	25.2	High	High	High	High	High	High		0.798	1.051	0.551	0.8	0.250006	31.2507	52.4	41.8	40.2	42.2	73.5	40.5	2	2	2	2	2	2	21.28
High	A8K564	cDNA FLJ76716, highly similar to Homo sapiens WD repeat domain 70 (WDR70), mRNA OS=Homo sapiens OX=9606 PE=2 SV=1	FALSE	TRUE	5.9633	4	4	4	654	73.1	High	High	High	High	High	High		0.756	1.07	0.586	0.804	0.245544	30.5403	81.3	61.5	63.6	68	90.4	53	3	3	3	3	3	3	11.28
High	Q15418	Ribosomal protein S6 kinase alpha-1 OS=Homo sapiens OX=9606 GN=RPS6KA1 PE=1 SV=2	FALSE	TRUE	5.44218	4	6	2	735	82.7	High	High	High	High	High	High		0.802	1.057	0.556	0.805	0.250513	31.1197	50.6	40.6	40.9	43.2	62.8	34.9	2	2	2	2	2	2	15.82
High	M0QZR4	Rho guanine nucleotide exchange factor 1 OS=Homo sapiens OX=9606 GN=ARHGEF1 PE=1 SV=1	FALSE	TRUE	3.6157	4	4	4	968	108.3	High	High	High	High	High	High		0.956	0.957	0.508	0.807	0.258942	32.087	43	41.2	40.3	38.6	61.2	31.1	1	1	1	1	1	1	7.14
High	H0Y368	Dolichol-phosphate mannosyltransferase subunit 1 (Fragment) OS=Homo sapiens OX=9606 GN=DPM1 PE=1 SV=1	FALSE	TRUE	15.5932	4	6	4	295	33.3	High	High	High	High	High	High		0.945	0.84	0.644	0.809667	0.152775	18.8689	48	45.4	45.6	38.3	60.4	38.9	3	3	3	3	3	3	16.6
High	H9STE0	Cytochrome c oxidase subunit 2 OS=Homo sapiens OX=9606 GN=COX2 PE=3 SV=1	FALSE	TRUE	21.645	4	5	4	231	25.9	High	High	High	High	High	High		0.804	0.756	0.88	0.813333	0.0625247	7.68746	82.4	66.3	90.3	68.2	96	84.5	3	3	3	3	3	3	14.47
High	Q8IV48	3'-5' exoribonuclease 1 OS=Homo sapiens OX=9606 GN=ERI1 PE=1 SV=3	FALSE	TRUE	10.8883	4	5	4	349	40	High	High	High	High	High	High		0.895	1.019	0.529	0.814333	0.254765	31.2851	67.3	60.2	48.7	49.6	71.1	37.6	3	3	3	3	3	3	10.24
High	V9HW96	Chaperonin containing TCP1, subunit 2 (Beta), isoform CRA_b OS=Homo sapiens OX=9606 GN=HEL-S-100n PE=1 SV=1	FALSE	TRUE	8.97196	4	4	4	535	57.5	High	High	High	High	High	High		0.896	0.994	0.555	0.815	0.230437	28.2744	16.4	14.7	14.9	14.8	24.7	13.7	1	1	1	1	1	1	10.45
High	D3DUW5	Dynamin 1-like, isoform CRA_c OS=Homo sapiens OX=9606 GN=DNM1L PE=3 SV=1	FALSE	TRUE	6.33714	4	4	4	789	87.8	High	High	High	High	High	High		0.818	1.12	0.507	0.815	0.306511	37.6087	58.3	47.7	45.7	51.2	75.4	38.2	2	2	2	2	2	2	10.63
High	Q9UHV9	Prefoldin subunit 2 OS=Homo sapiens OX=9606 GN=PFDN2 PE=1 SV=1	FALSE	TRUE	29.2208	4	6	4	154	16.6	High	High	High	High	High	High		0.877	1.087	0.487	0.817	0.304467	37.2664	29.2	25.6	22.8	24.8	35.5	17.3	2	2	2	2	2	2	16.69
High	B3KN68	cDNA FLJ13801 fis, clone THYRO1000173, highly similar to AP-1 complex subunit mu-2 OS=Homo sapiens OX=9606 PE=2 SV=1	FALSE	TRUE	8.74704	4	4	4	423	48	High	High	High	High	High	High		0.667	1.098	0.687	0.817333	0.24327	29.7639	65.8	43.9	48.3	53	68	46.7	2	2	2	2	2	2	8.74
High	Q15392	Delta(24)-sterol reductase OS=Homo sapiens OX=9606 GN=DHCR24 PE=1 SV=2	FALSE	TRUE	8.72093	4	4	4	516	60.1	High	High	High	High	High	High		0.841	1.019	0.596	0.818667	0.212383	25.9425	70	58.9	56.7	57.8	95.9	57.2	4	4	4	4	4	4	11.05
High	Q71V07	Signal recognition particle subunit SRP72 OS=Homo sapiens OX=9606 PE=2 SV=1	FALSE	TRUE	6.40835	4	4	4	671	74.6	High	High	High	High	High	High		0.828	1.002	0.628	0.819333	0.187151	22.8418	68.2	56.5	62.8	62.9	89.9	56.5	1	1	1	1	1	1	8.75
High	P15822	Zinc finger protein 40 OS=Homo sapiens OX=9606 GN=HIVEP1 PE=1 SV=3	FALSE	TRUE	1.3613	4	4	4	2718	296.7	High	High	High	High	High	High		0.794	1.067	0.597	0.819333	0.236022	28.8066	34.1	27.1	30	32	47.6	28.4	2	2	2	2	2	2	9.15
High	Q16513	Serine/threonine-protein kinase N2 OS=Homo sapiens OX=9606 GN=PKN2 PE=1 SV=1	FALSE	TRUE	3.55691	4	4	3	984	112	High	High	High	High	High	High		0.872	1.052	0.536	0.82	0.261901	31.9391	139	121.1	112.4	118.2	183.9	98.5	4	4	4	4	4	4	8.56
High	Q13045	Protein flightless-1 homolog OS=Homo sapiens OX=9606 GN=FLII PE=1 SV=2	FALSE	TRUE	2.60047	4	4	4	1269	144.7	High	High	High	High	High	High		0.945	0.975	0.54	0.82	0.242951	29.6281	116.8	110.5	99.4	97	162	87.5	3	3	3	3	3	3	8.89
High	P08240	Signal recognition particle receptor subunit alpha OS=Homo sapiens OX=9606 GN=SRPRA PE=1 SV=2	FALSE	TRUE	5.79937	4	4	4	638	69.8	High	High	High	High	High	High		1.024	0.844	0.594	0.820667	0.215948	26.3137	48.3	49.5	45.4	38.3	65.1	38.7	2	2	2	2	2	2	6.21
High	Q9Y3E8	CGI-150 protein OS=Homo sapiens OX=9606 PE=2 SV=1	FALSE	TRUE	7.93651	4	4	4	504	55	High	High	High	High	High	High		0.797	1.114	0.551	0.820667	0.282245	34.3922	80.1	63.9	70.4	78.4	106.8	58.9	4	4	4	4	4	4	9.27
High	A0A024R5P1	Phosphatidylinositol binding clathrin assembly protein, isoform CRA_i OS=Homo sapiens OX=9606 GN=PICALM PE=4 SV=1	FALSE	TRUE	5.67485	4	4	4	652	70.7	High	High	High	High	High	High		0.785	1.05	0.634	0.823	0.210587	25.5878	81.4	63.9	62.3	65.4	96.1	60.9	3	3	3	3	3	3	10.33
High	A0A024R7L8	UPF1 regulator of nonsense transcripts homolog (Yeast), isoform CRA_a OS=Homo sapiens OX=9606 GN=UPF1 PE=4 SV=1	FALSE	TRUE	6.20018	4	4	4	1129	124.3	High	High	High	High	High	High		0.769	0.993	0.718	0.826667	0.146289	17.6962	32.5	25	26.7	26.5	39.3	28.2	2	2	2	2	2	2	10.16
High	P18074	General transcription and DNA repair factor IIH helicase subunit XPD OS=Homo sapiens OX=9606 GN=ERCC2 PE=1 SV=1	FALSE	TRUE	6.31579	4	4	4	760	86.9	High	High	High	High	High	High		0.886	0.966	0.628	0.826667	0.176639	21.3676	30.7	27.2	26.2	25.3	36	22.6	2	2	2	2	2	2	9.53
High	O00400	Acetyl-coenzyme A transporter 1 OS=Homo sapiens OX=9606 GN=SLC33A1 PE=1 SV=1	FALSE	TRUE	8.37887	4	4	4	549	60.9	High	High	High	High	High	High		0.816	1.122	0.542	0.826667	0.290147	35.0984	40.5	33	35.8	40.2	59	32	3	3	3	3	3	3	8.09
High	F8VV71	Ubiquitin-conjugating enzyme E2 N OS=Homo sapiens OX=9606 GN=UBE2N PE=1 SV=1	FALSE	TRUE	34.2105	4	4	4	152	17.7	High	High	High	High	High	High		0.882	0.957	0.649	0.829333	0.160612	19.3664	69.2	61	66.2	63.3	89.2	57.9	3	3	3	3	3	3	12.57
High	B7Z4C8	cDNA FLJ57527, highly similar to 60S ribosomal protein L31 OS=Homo sapiens OX=9606 GN=RPL31 PE=1 SV=1	FALSE	TRUE	31.5385	4	5	4	130	15.1	High	High	High	High	High	High		0.902	0.899	0.698	0.833	0.116923	14.0364	228.5	206.1	224.5	201.8	288.8	201.6	4	4	4	4	4	4	15.75
High	A0A024R7V7	Chromodomain helicase DNA binding protein 7, isoform CRA_a OS=Homo sapiens OX=9606 GN=CHD7 PE=4 SV=1	FALSE	TRUE	1.49452	4	5	1	3011	337.4	Medium	Medium	Medium	Medium	Medium	Medium		0.909	0.802	0.788	0.833	0.0661891	7.94587	17.4	15.8	23.7	19	24.1	19	1	1	1	1	1	1	8.93
High	A8K9E1	cDNA FLJ77957, highly similar to Homo sapiens HBS1-like (S. cerevisiae) (HBS1L), mRNA OS=Homo sapiens OX=9606 PE=2 SV=1	FALSE	TRUE	5.55556	4	4	4	684	75.5	High	High	High	High	High	High		0.876	1.134	0.491	0.833667	0.323584	38.8145	17	14.9	12	13.6	22	10.8	1	1	1	1	1	1	10.15
High	A0A024R0W3	Solute carrier family 38, member 2, isoform CRA_b OS=Homo sapiens OX=9606 GN=SLC38A2 PE=4 SV=1	FALSE	TRUE	13.6364	4	4	4	506	56	High	High	High	High	High	High		0.726	1.304	0.473	0.834333	0.42596	51.054	11.7	8.5	10.1	13.2	16.9	8	1	1	1	1	1	1	9.57
High	P62277	40S ribosomal protein S13 OS=Homo sapiens OX=9606 GN=RPS13 PE=1 SV=2	FALSE	TRUE	28.4768	4	5	4	151	17.2	High	High	High	High	High	High		0.943	0.536	1.025	0.834667	0.261882	31.3757	48.7	45.9	77.4	41.5	67.7	69.4	3	3	3	3	3	3	13.34
High	Q9NY93	Probable ATP-dependent RNA helicase DDX56 OS=Homo sapiens OX=9606 GN=DDX56 PE=1 SV=1	FALSE	TRUE	7.49543	4	4	4	547	61.6	High	High	High	High	High	High		0.856	1.028	0.63	0.838	0.19961	23.8198	134.5	115.2	109	112.1	160.8	101.3	3	3	3	3	3	3	9.93
High	A0A024R4H0	Procollagen-lysine 1, 2-oxoglutarate 5-dioxygenase 1, isoform CRA_a OS=Homo sapiens OX=9606 GN=PLOD1 PE=4 SV=1	FALSE	TRUE	5.77717	4	4	4	727	83.5	High	High	High	High	High	High		0.774	1.091	0.649	0.838	0.227844	27.1891	53.2	41.2	42.1	45.9	64.3	41.7	3	3	3	3	3	3	9.39
High	Q9H8E8	Cysteine-rich protein 2-binding protein OS=Homo sapiens OX=9606 GN=KAT14 PE=1 SV=3	FALSE	TRUE	4.60358	4	4	4	782	88.8	High	High	High	High	High	High		0.845	1.01	0.674	0.843	0.168009	19.9299	49.7	42	43.7	44.1	55.9	37.7	3	3	3	3	3	3	7.35
High	Q9BZL6	Serine/threonine-protein kinase D2 OS=Homo sapiens OX=9606 GN=PRKD2 PE=1 SV=3	FALSE	TRUE	6.60592	4	5	4	878	96.7	High	High	High	High	High	High		0.839	0.96	0.733	0.844	0.113583	13.4577	24.9	20.9	23.2	22.3	27	19.8	2	2	2	2	2	2	11.33
High	B7Z6Z4	cDNA FLJ56329, highly similar to Myosin light polypeptide 6 OS=Homo sapiens OX=9606 GN=MYL6 PE=1 SV=1	FALSE	TRUE	17.2269	4	4	4	238	26.7	High	High	High	High	High	High		0.889	1.173	0.47	0.844	0.353654	41.9021	106.6	94.8	96.5	113.2	158.3	74.4	2	2	2	2	2	2	9.72
High	B2R4D8	60S ribosomal protein L27 OS=Homo sapiens OX=9606 PE=2 SV=1	FALSE	TRUE	32.3529	4	6	3	136	15.8	High	High	High	High	High	High		0.911	1.013	0.61	0.844667	0.209529	24.8061	201.6	183.6	177.6	179.9	257.9	157.2	3	3	3	3	3	3	14.58
High	A0A024R572	Splicing factor 1, isoform CRA_h OS=Homo sapiens OX=9606 GN=SF1 PE=4 SV=1	FALSE	TRUE	10.3286	4	7	4	639	68.3	High	High	High	High	High	High		0.772	1.17	0.599	0.847	0.292795	34.5685	63	48.6	51.3	60	80.2	48	2	2	2	2	2	2	21.15
High	A8K5J1	Uridine monophosphate synthetase (Orotate phosphoribosyl transferase and orotidine-5'-decarboxylase), isoform CRA_b OS=Homo sapiens OX=9606 GN=UMPS PE=2 SV=1	FALSE	TRUE	9.79167	4	4	4	480	52.2	High	High	High	High	High	High		0.831	1.101	0.613	0.848333	0.244461	28.8167	112.8	93.8	85.3	93.9	127.4	78.1	3	3	3	3	3	3	7.27
High	J3KN16	Proteasome adapter and scaffold protein ECM29 OS=Homo sapiens OX=9606 GN=ECPAS PE=1 SV=1	FALSE	TRUE	1.78483	4	4	4	2017	223.6	High	High	High	High	High	High		0.78	1.25	0.53	0.853333	0.365559	42.8389	66.7	52	44.5	55.6	77.9	41.3	3	3	3	3	3	3	6.73
High	P57772	Selenocysteine-specific elongation factor OS=Homo sapiens OX=9606 GN=EEFSEC PE=1 SV=4	FALSE	TRUE	8.22148	4	4	4	596	65.3	High	High	High	High	High	High		0.683	1.452	0.436	0.857	0.529878	61.8294	19.7	13.5	16	23.2	29.8	13	1	1	1	1	1	1	12.64
High	A0A0A0MT64	NADPH:adrenodoxin oxidoreductase, mitochondrial OS=Homo sapiens OX=9606 GN=FDXR PE=1 SV=1	FALSE	TRUE	8.05243	4	4	4	534	58.2	High	High	High	High	High	High		0.863	0.932	0.782	0.859	0.07508	8.74039	41.5	35.8	29.7	27.7	43.1	33.7	2	2	2	2	2	2	9.51
High	Q5SQH4	DBP2 protein OS=Homo sapiens OX=9606 GN=DBP2 PE=2 SV=1	FALSE	TRUE	3.07397	4	4	3	1041	119.2	High	High	High	High	High	High		0.888	1.106	0.584	0.859333	0.262178	30.5095	51.8	46	42.9	47.4	67	39.1	3	3	3	3	3	3	5.35
High	A8K3S0	cDNA FLJ76127, highly similar to Homo sapiens replication factor C (activator 1) 5, 36.5kDa (RFC5), transcript variant 1, mRNA OS=Homo sapiens OX=9606 PE=2 SV=1	FALSE	TRUE	13.2353	4	5	4	340	38.4	High	High	High	High	High	High		0.889	1.19	0.503	0.860667	0.344375	40.0126	24.6	21.9	18.2	21.7	33.4	16.8	1	1	1	1	1	1	13.39
High	Q6NZI2	Caveolae-associated protein 1 OS=Homo sapiens OX=9606 GN=CAVIN1 PE=1 SV=1	FALSE	TRUE	12.8205	4	5	4	390	43.5	High	High	High	High	High	High		0.777	1.247	0.561	0.861667	0.35075	40.706	28.4	22	21.8	27.2	33.7	18.9	2	2	2	2	2	2	14.49
High	B4DKM0	cDNA FLJ51883, highly similar to Mitochondrial 39S ribosomal protein L3 OS=Homo sapiens OX=9606 PE=2 SV=1	FALSE	TRUE	10.1333	4	4	4	375	41.6	High	High	High	High	High	High		0.89	0.961	0.736	0.862333	0.115023	13.3386	40.9	36.5	39.5	38	53	39	3	3	3	3	3	3	6.34
High	Q9BQ61	Telomerase RNA component interacting RNase OS=Homo sapiens OX=9606 GN=TRIR PE=1 SV=1	FALSE	TRUE	23.2955	4	6	4	176	18.4	High	High	High	High	High	High		0.807	1.207	0.576	0.863333	0.31925	36.9787	158.6	127.9	111	133.9	184.8	106.5	3	3	3	3	3	3	10.25
High	Q9NUQ2	1-acyl-sn-glycerol-3-phosphate acyltransferase epsilon OS=Homo sapiens OX=9606 GN=AGPAT5 PE=1 SV=3	FALSE	TRUE	10.1648	4	5	4	364	42	High	High	High	High	High	High		0.905	0.85	0.843	0.866	0.0339559	3.921	98.1	88.8	103.1	87.6	116.9	98.6	4	4	4	4	4	4	10.82
High	Q9UBK9	Protein UXT OS=Homo sapiens OX=9606 GN=UXT PE=1 SV=1	FALSE	TRUE	28.6624	4	4	4	157	18.2	High	High	High	High	High	High		0.848	1.17	0.581	0.866333	0.294928	34.0432	46.3	39.2	35.9	42	55.9	32.5	3	3	3	3	3	3	11.26
High	Q02750	Dual specificity mitogen-activated protein kinase kinase 1 OS=Homo sapiens OX=9606 GN=MAP2K1 PE=1 SV=2	FALSE	TRUE	7.88804	4	4	1	393	43.4	High	High	High	High	High	High		0.875	1.113	0.615	0.867667	0.249081	28.707	39.3	34.4	26	29	45.5	28	1	1	1	1	1	1	7.81
High	Q9NXE4	Sphingomyelin phosphodiesterase 4 OS=Homo sapiens OX=9606 GN=SMPD4 PE=1 SV=3	FALSE	TRUE	3.9261	4	4	4	866	97.7	High	High	High	High	High	High		0.92	1.079	0.608	0.869	0.239606	27.5726	56.3	51.8	47.6	51.4	80.1	48.7	3	3	3	3	3	3	6.55
High	P85037	Forkhead box protein K1 OS=Homo sapiens OX=9606 GN=FOXK1 PE=1 SV=1	FALSE	TRUE	5.59345	4	4	4	733	75.4	High	High	High	High	High	High		0.96	0.895	0.77	0.875	0.096566	11.0361	24.5	23.6	23.3	20.9	32.2	24.8	2	2	2	2	2	2	8.1
High	Q96BK5	PIN2/TERF1-interacting telomerase inhibitor 1 OS=Homo sapiens OX=9606 GN=PINX1 PE=1 SV=2	FALSE	TRUE	15.5488	4	4	4	328	37	High	High	High	High	High	High		0.74	1.361	0.525	0.875333	0.43412	49.5948	40.3	29.8	28.9	39.4	48.8	25.6	2	2	2	2	2	2	9.27
High	J3KNZ9	Probable fibrosin-1 OS=Homo sapiens OX=9606 GN=FBRS PE=1 SV=1	FALSE	TRUE	5.91837	4	5	4	980	103.7	High	High	High	High	High	High		0.902	1.152	0.573	0.875667	0.290397	33.1629	106.1	95.8	85	97.9	140.7	80.6	2	2	2	2	2	2	10.29
High	Q9NRR4	Ribonuclease 3 OS=Homo sapiens OX=9606 GN=DROSHA PE=1 SV=2	FALSE	TRUE	3.05677	4	4	4	1374	159.2	High	High	High	High	High	High		0.827	1.154	0.652	0.877667	0.254806	29.0323	65.1	53.8	47.6	54.9	79.4	51.8	3	3	3	3	3	3	4.67
High	A0A2R8Y7R9	Liprin-alpha-1 (Fragment) OS=Homo sapiens OX=9606 GN=PPFIA1 PE=1 SV=1	FALSE	TRUE	2.53268	4	4	4	1224	138.5	High	High	High	High	High	High		0.881	1.285	0.469	0.878333	0.408007	46.4524	28.2	24.8	22.4	28.8	40.3	18.9	2	2	2	2	2	2	4.69
High	Q5SVZ6	Zinc finger MYM-type protein 1 OS=Homo sapiens OX=9606 GN=ZMYM1 PE=1 SV=1	FALSE	TRUE	3.76532	4	4	4	1142	128.6	High	High	High	High	High	High		0.887	1.195	0.555	0.879	0.320075	36.4135	30.3	26.9	24.6	29.4	38.2	21.2	2	2	2	2	2	2	11.71
High	Q96N66	Lysophospholipid acyltransferase 7 OS=Homo sapiens OX=9606 GN=MBOAT7 PE=1 SV=2	FALSE	TRUE	11.2288	4	4	4	472	52.7	High	High	High	High	High	High		0.883	1.188	0.568	0.879667	0.310013	35.2421	70.5	62.2	51.4	61.1	90	51.1	3	3	3	3	3	3	11.78
High	Q8WTW3	Conserved oligomeric Golgi complex subunit 1 OS=Homo sapiens OX=9606 GN=COG1 PE=1 SV=1	FALSE	TRUE	3.36735	4	4	4	980	108.9	Medium	Medium	Medium	Medium	Medium	Medium		0.895	1.112	0.632	0.879667	0.240367	27.3248	78.6	70.4	59.1	65.7	93.3	59	2	2	2	2	2	2	6.52
High	E9PB61	THO complex subunit 4 OS=Homo sapiens OX=9606 GN=ALYREF PE=1 SV=1	FALSE	TRUE	22.7273	4	4	4	264	27.5	High	High	High	High	High	High		0.848	1.115	0.678	0.880333	0.220287	25.0231	46.8	39.7	33.9	37.8	59.4	40.3	1	1	1	1	1	1	14.38
High	Q5JPH6	Probable glutamate--tRNA ligase, mitochondrial OS=Homo sapiens OX=9606 GN=EARS2 PE=1 SV=2	FALSE	TRUE	8.413	4	4	4	523	58.7	High	High	High	High	High	High		0.827	1.103	0.721	0.883667	0.197204	22.3165	64.4	53.3	47.8	52.7	70	50.5	3	3	3	3	3	3	11.49
High	P62263	40S ribosomal protein S14 OS=Homo sapiens OX=9606 GN=RPS14 PE=1 SV=3	FALSE	TRUE	29.1391	4	6	4	151	16.3	High	High	High	High	High	High		0.837	0.988	0.828	0.884333	0.0898907	10.1648	114.6	95.9	105.9	104.6	146.5	121.3	2	2	2	2	2	2	18.61
High	Q9UPU5	Ubiquitin carboxyl-terminal hydrolase 24 OS=Homo sapiens OX=9606 GN=USP24 PE=1 SV=3	FALSE	TRUE	1.22137	4	5	3	2620	294.2	High	High	High	High	High	High		0.815	1.181	0.662	0.886	0.266685	30.0999	13.5	11	9.3	11	14.5	9.6	1	1	1	1	1	1	10.98
High	P21675	Transcription initiation factor TFIID subunit 1 OS=Homo sapiens OX=9606 GN=TAF1 PE=1 SV=2	FALSE	TRUE	1.81624	4	4	4	1872	212.5	High	High	High	High	High	High		0.805	1.284	0.569	0.886	0.364317	41.1193	168.4	135.5	139.9	179.7	232.4	132.2	3	3	3	3	3	3	4.69
High	J3QR07	YTH domain-containing protein 1 OS=Homo sapiens OX=9606 GN=YTHDC1 PE=1 SV=1	FALSE	TRUE	4.21769	4	5	4	735	85.5	High	High	High	High	High	High		0.893	1.086	0.679	0.886	0.20359	22.9786	202.3	180.7	168.9	183.4	248.6	168.9	4	4	4	4	4	4	11.4
High	O95747	Serine/threonine-protein kinase OSR1 OS=Homo sapiens OX=9606 GN=OXSR1 PE=1 SV=1	FALSE	TRUE	8.15939	4	5	2	527	58	High	High	High	High	High	High		0.848	1.236	0.576	0.886667	0.331695	37.4092	31.7	26.8	20.4	25.2	42.5	24.5	2	2	2	2	2	2	11.74
High	A8K4T8	Condensin complex subunit 2 OS=Homo sapiens OX=9606 PE=2 SV=1	FALSE	TRUE	5.26316	4	4	4	741	82.5	High	High	High	High	High	High		0.859	1.075	0.727	0.887	0.175682	19.8063	20.6	17.7	15.2	16.3	20.9	15.2	1	1	1	1	1	1	9.89
High	P43897	Elongation factor Ts, mitochondrial OS=Homo sapiens OX=9606 GN=TSFM PE=1 SV=2	FALSE	TRUE	14.4615	4	7	4	325	35.4	High	High	High	High	High	High		0.965	1.067	0.633	0.888333	0.22693	25.5456	88.5	85.4	78.4	83.7	121.9	77.2	4	4	4	4	4	4	17.9
High	P04181	Ornithine aminotransferase, mitochondrial OS=Homo sapiens OX=9606 GN=OAT PE=1 SV=1	FALSE	TRUE	8.42825	4	4	4	439	48.5	High	High	High	High	High	High		0.973	1.092	0.602	0.889	0.255572	28.7482	45.7	44.4	36.7	40.1	61.1	36.8	2	2	2	2	2	2	9.53
High	P46776	60S ribosomal protein L27a OS=Homo sapiens OX=9606 GN=RPL27A PE=1 SV=2	FALSE	TRUE	26.3514	4	6	4	148	16.6	High	High	High	High	High	High		0.946	0.838	0.889	0.891	0.0540278	6.06372	114.5	108.3	111.2	93.1	142.8	127	4	4	4	4	4	4	13.12
High	A0A024R7X7	Staufen, RNA binding protein, homolog 2 (Drosophila), isoform CRA_b OS=Homo sapiens OX=9606 GN=STAU2 PE=4 SV=1	FALSE	TRUE	7.7193	4	4	3	570	62.6	High	High	High	High	High	High		0.989	1.032	0.654	0.891667	0.206945	23.2088	130.9	129.5	118	121.7	178.7	116.9	4	4	4	4	4	4	11.19
High	J3KQN4	60S ribosomal protein L36a OS=Homo sapiens OX=9606 GN=RPL36A PE=1 SV=1	FALSE	TRUE	19.7183	4	4	1	142	16.4	High	High	High	High	High	High		0.99	0.975	0.711	0.892	0.15693	17.593	245.3	243	224.4	218.7	328.7	233.6	4	4	4	4	4	4	7.63
High	Q8NB90	Spermatogenesis-associated protein 5 OS=Homo sapiens OX=9606 GN=SPATA5 PE=1 SV=3	FALSE	TRUE	3.80739	4	6	3	893	97.8	High	High	High	High	High	High		1.014	1.075	0.587	0.892	0.265893	29.8086	54.1	54.9	53.9	58	78.5	46.1	2	2	2	2	2	2	11.52
High	Q5U0I6	H.sapiens ras-related Hrab1A protein OS=Homo sapiens OX=9606 GN=RAB1A PE=2 SV=1	FALSE	TRUE	18.0488	4	4	1	205	22.7	High	High	High	High	High	High		0.852	0.997	0.842	0.897	0.0867468	9.67076	22.3	19	18.9	18.8	24.1	20.3	1	1	1	1	1	1	9.34
High	A0A0A0MTH9	TATA-binding protein-associated factor 172 OS=Homo sapiens OX=9606 GN=BTAF1 PE=1 SV=1	FALSE	TRUE	2.37966	4	5	4	1849	206.8	High	High	High	High	High	High		1.053	0.936	0.707	0.898667	0.175995	19.584	24.5	25.8	25.7	24.1	32.4	22.9	2	2	2	2	2	2	13.63
High	Q99633	Pre-mRNA-splicing factor 18 OS=Homo sapiens OX=9606 GN=PRPF18 PE=1 SV=1	FALSE	TRUE	13.7427	4	4	4	342	39.8	High	High	High	High	High	High		0.814	1.229	0.662	0.901667	0.29349	32.5497	91.8	74.7	76.7	94.3	116.6	77.2	4	4	4	4	4	4	11.49
High	A0A024R8A7	HCG31253, isoform CRA_a OS=Homo sapiens OX=9606 GN=hCG_31253 PE=4 SV=1	FALSE	TRUE	6.11888	4	4	1	572	61.6	High	High	High	High	High	High		0.886	1.156	0.665	0.902333	0.245907	27.2524	18.4	16.3	12.3	14.2	26.3	17.5	1	1	1	1	1	1	5.6
High	A8K594	cDNA FLJ77256, highly similar to Homo sapiens SH3-domain binding protein 4 (SH3BP4), mRNA OS=Homo sapiens OX=9606 PE=2 SV=1	FALSE	TRUE	4.15369	4	4	4	963	107.4	High	High	High	High	High	High		0.854	1.182	0.671	0.902333	0.258906	28.6929	63.1	53.9	41.7	49.3	68.6	46	3	3	3	3	3	3	4.47
High	Q8N1G0	Zinc finger protein 687 OS=Homo sapiens OX=9606 GN=ZNF687 PE=1 SV=1	FALSE	TRUE	4.85044	4	4	4	1237	129.4	High	High	High	High	High	High		0.881	1.218	0.608	0.902333	0.305559	33.8632	45.7	40.2	33.5	40.8	54.3	33	2	2	2	2	2	2	12.26
High	A0A0S2Z3Y1	Lectin galactoside-binding soluble 3 binding protein isoform 1 (Fragment) OS=Homo sapiens OX=9606 GN=LGALS3BP PE=2 SV=1	FALSE	TRUE	8.71795	4	4	4	585	65.3	High	High	High	High	High	High		0.778	1.297	0.647	0.907333	0.343759	37.8868	35.3	27.5	23	29.8	44.2	28.6	2	2	2	2	2	2	10.97
High	A8K5Q1	cDNA FLJ77548, highly similar to Homo sapiens bin3, bicoid-interacting 3, homolog (Drosophila) (BCDIN3), mRNA OS=Homo sapiens OX=9606 PE=2 SV=1	FALSE	TRUE	7.25689	4	4	4	689	74.3	High	High	High	High	High	High		0.733	1.317	0.681	0.910333	0.353142	38.7926	50.1	36.7	35.4	46.6	59.5	40.5	3	3	3	3	3	3	13.71
High	A8K517	Ribosomal protein S23, isoform CRA_a OS=Homo sapiens OX=9606 GN=RPS23 PE=2 SV=1	FALSE	TRUE	28.6713	4	6	4	143	15.8	High	High	High	High	High	High		0.92	1.117	0.706	0.914333	0.205559	22.4818	137.1	126.1	119.5	133.5	176.5	124.6	3	3	3	3	3	3	17.89
High	A8K2T7	Receptor protein-tyrosine kinase OS=Homo sapiens OX=9606 PE=2 SV=1	FALSE	TRUE	3.71901	4	4	4	1210	134.1	High	High	High	High	High	High		1.052	1.078	0.63	0.92	0.251484	27.3352	40.3	42.4	32.8	35.4	53.5	33.7	2	2	2	2	2	2	11.11
High	Q6IBS0	Twinfilin-2 OS=Homo sapiens OX=9606 GN=TWF2 PE=1 SV=2	FALSE	TRUE	12.6074	4	4	4	349	39.5	High	High	High	High	High	High		0.77	1.282	0.712	0.921333	0.31369	34.0474	146.1	112.5	107.5	137.8	176.5	125.6	4	4	4	4	4	4	10.08
High	P62875	DNA-directed RNA polymerases I, II, and III subunit RPABC5 OS=Homo sapiens OX=9606 GN=POLR2L PE=1 SV=1	FALSE	TRUE	47.7612	4	14	4	67	7.6	High	High	High	High	High	High		0.845	1.201	0.729	0.925	0.245959	26.5902	507	428.2	374.9	450.1	636.8	464.3	5	5	5	5	5	5	34.44
High	B2R960	cDNA, FLJ94230, highly similar to Homo sapiens thioredoxin-like 1 (TXNL1), mRNA OS=Homo sapiens OX=9606 PE=2 SV=1	FALSE	TRUE	23.5294	4	5	4	289	32.2	High	High	High	High	High	High		0.973	1.183	0.623	0.926333	0.282902	30.5399	58	56.5	53.9	63.8	82.2	51.2	2	2	2	2	2	2	16.66
High	P62913	60S ribosomal protein L11 OS=Homo sapiens OX=9606 GN=RPL11 PE=1 SV=2	FALSE	TRUE	20.7865	4	8	4	178	20.2	High	High	High	High	High	High		1.002	0.985	0.799	0.928667	0.112616	12.1266	211.8	212.2	200.9	197.9	254.3	203.3	4	4	4	4	4	4	21.11
High	Q5VZK9	F-actin-uncapping protein LRRC16A OS=Homo sapiens OX=9606 GN=CARMIL1 PE=1 SV=1	FALSE	TRUE	3.64697	4	4	4	1371	151.5	High	High	High	High	High	High		1.098	1.086	0.607	0.930333	0.280079	30.1052	10.1	11.1	8.9	9.7	14	8.5	1	1	1	1	1	1	8.18
High	Q32Q12	Nucleoside diphosphate kinase OS=Homo sapiens OX=9606 GN=NME1-NME2 PE=1 SV=1	FALSE	TRUE	17.4658	4	4	4	292	32.6	High	High	High	High	High	High		1.066	0.771	0.955	0.930667	0.148998	16.0098	48.6	51.8	80	61.7	73.6	70.3	4	4	4	4	4	4	10.51
High	O75152	Zinc finger CCCH domain-containing protein 11A OS=Homo sapiens OX=9606 GN=ZC3H11A PE=1 SV=3	FALSE	TRUE	6.04938	4	4	3	810	89.1	High	High	High	High	High	High		0.776	1.211	0.808	0.931667	0.242438	26.022	22.1	17.1	21.6	26.1	31.7	25.6	2	2	2	2	2	2	11.16
High	P48507	Glutamate--cysteine ligase regulatory subunit OS=Homo sapiens OX=9606 GN=GCLM PE=1 SV=1	FALSE	TRUE	16.7883	4	5	4	274	30.7	High	High	High	High	High	High		1.164	0.95	0.686	0.933333	0.239435	25.6538	21.4	24.9	21.3	20.2	32.5	22.3	1	1	1	1	1	1	13.32
High	Q8IWZ3	Ankyrin repeat and KH domain-containing protein 1 OS=Homo sapiens OX=9606 GN=ANKHD1 PE=1 SV=1	FALSE	TRUE	1.21951	4	4	4	2542	269.3	High	High	High	High	High	High		1.164	1.006	0.635	0.935	0.271553	29.0431	53.2	61.9	40.8	41	64.4	40.9	3	3	3	3	3	3	7.3
High	Q9NX20	39S ribosomal protein L16, mitochondrial OS=Homo sapiens OX=9606 GN=MRPL16 PE=1 SV=1	FALSE	TRUE	16.3347	4	4	4	251	28.4	High	High	High	High	High	High		0.914	1.155	0.738	0.935667	0.209343	22.3736	68.5	62.6	61.6	71.1	90	66.4	3	3	3	3	3	3	7.53
High	Q6STE5	SWI/SNF-related matrix-associated actin-dependent regulator of chromatin subfamily D member 3 OS=Homo sapiens OX=9606 GN=SMARCD3 PE=1 SV=1	FALSE	TRUE	10.559	4	5	3	483	55	High	High	High	High	High	High		0.798	1.352	0.679	0.943	0.359167	38.0877	31.4	25.1	23.9	32.3	39.6	26.9	2	2	2	2	2	2	16.41
High	A0A2S1ZR79	Structural maintenance of chromosomes protein 6 OS=Homo sapiens OX=9606 GN=SMC6 PE=2 SV=1	FALSE	TRUE	3.11641	4	4	4	1091	126.3	High	High	High	High	High	High		0.818	1.345	0.675	0.946	0.352864	37.3006	34.2	28	22.7	30.5	43.1	29.1	2	2	2	2	2	2	7.48
High	A0A024R7M6	GATA zinc finger domain containing 2A, isoform CRA_a OS=Homo sapiens OX=9606 GN=GATAD2A PE=4 SV=1	FALSE	TRUE	6.30915	4	4	3	634	68.1	High	High	High	High	High	High		0.856	1.308	0.674	0.946	0.326441	34.5075	47.1	40.4	39.3	51.4	63.5	42.8	2	2	2	2	2	2	6.02
High	O96008	Mitochondrial import receptor subunit TOM40 homolog OS=Homo sapiens OX=9606 GN=TOMM40 PE=1 SV=1	FALSE	TRUE	14.1274	4	4	4	361	37.9	High	High	High	High	High	High		0.976	1.14	0.727	0.947667	0.207953	21.9437	68.6	66.9	64.7	73.7	95.5	69.4	3	3	3	3	3	3	7.35
High	A0A0S2Z595	FOS-like antigen 1 isoform 1 (Fragment) OS=Homo sapiens OX=9606 GN=FOSL1 PE=2 SV=1	FALSE	TRUE	18.8192	4	5	4	271	29.4	High	High	High	High	High	High		0.823	1.467	0.581	0.957	0.457948	47.8524	81.9	67.4	63.3	92.8	114.7	66.6	3	3	3	3	3	3	9.14
High	M4VR43	Apolipoprotein B editing enzyme catalytic polypeptide-like 3F OS=Homo sapiens OX=9606 GN=APOBEC3F PE=2 SV=1	FALSE	TRUE	12.3324	4	4	3	373	45	High	High	High	High	High	High		0.937	1.2	0.734	0.957	0.233643	24.4141	55	51.6	42.8	51.4	78.5	57.6	3	3	3	3	3	3	10.87
High	V9HW00	Epididymis secretory sperm binding protein Li 77p (Fragment) OS=Homo sapiens OX=9606 GN=HEL-S-77p PE=2 SV=1	FALSE	TRUE	14.2012	4	4	4	338	39	High	High	High	High	High	High		0.934	1.248	0.697	0.959667	0.276395	28.8012	54.4	50.8	48.2	60.2	76.3	53.2	3	3	3	3	3	3	8.76
High	A0A024R411	Origin recognition complex, subunit 2-like (Yeast), isoform CRA_a OS=Homo sapiens OX=9606 GN=ORC2L PE=4 SV=1	FALSE	TRUE	8.14558	4	4	4	577	65.9	High	High	High	High	High	High		0.876	1.471	0.538	0.961667	0.472363	49.1192	24.8	21.7	21.1	31.1	45	24.2	2	2	2	2	2	2	9.82
High	O15427	Monocarboxylate transporter 4 OS=Homo sapiens OX=9606 GN=SLC16A3 PE=1 SV=1	FALSE	TRUE	6.45161	4	4	4	465	49.4	High	High	High	High	High	High		0.938	1.16	0.795	0.964333	0.183919	19.0722	229.3	215.1	208.1	241.4	297.4	236.3	4	4	4	4	4	4	7.86
High	Q8NDV7	Trinucleotide repeat-containing gene 6A protein OS=Homo sapiens OX=9606 GN=TNRC6A PE=1 SV=2	FALSE	TRUE	2.03874	4	4	4	1962	210.2	High	High	High	High	High	High		0.911	1.276	0.716	0.967667	0.284268	29.3767	61.4	55.9	47.8	61	79	56.6	2	2	2	2	2	2	9.24
High	Q68CP9	AT-rich interactive domain-containing protein 2 OS=Homo sapiens OX=9606 GN=ARID2 PE=1 SV=2	FALSE	TRUE	2.6158	4	4	4	1835	197.3	High	High	High	High	High	High		0.858	1.427	0.627	0.970667	0.411728	42.4171	35.7	30.6	28.7	40.9	45.9	28.8	2	2	2	2	2	2	7.14
High	B2R4V2	cDNA, FLJ92227, highly similar to Homo sapiens ribosomal protein L36a-like (RPL36AL), mRNA OS=Homo sapiens OX=9606 PE=2 SV=1	FALSE	TRUE	26.4151	4	4	1	106	12.5	Medium	Medium	Medium	Medium	Medium	Medium		1.156	1.161	0.598	0.971667	0.323614	33.3051	26.8	31	30.9	35.9	49	29.3	1	1	1	1	1	1	7.63
High	Q15847	Adipogenesis regulatory factor OS=Homo sapiens OX=9606 GN=ADIRF PE=1 SV=1	FALSE	TRUE	78.9474	4	7	4	76	7.9	High	High	High	High	High	High		0.946	1.351	0.619	0.972	0.366692	37.7255	217.3	205.4	168.8	228	318.1	196.8	4	4	4	4	4	4	22.26
High	A4D0V4	Capping protein (Actin filament) muscle Z-line, alpha 2 OS=Homo sapiens OX=9606 GN=CAPZA2 PE=2 SV=1	FALSE	TRUE	22.028	4	5	3	286	32.9	High	High	High	High	High	High		0.964	1.164	0.79	0.972667	0.187151	19.241	54.3	52.3	51	59.4	69.5	54.9	2	2	2	2	2	2	17.23
High	A0AVK6	Transcription factor E2F8 OS=Homo sapiens OX=9606 GN=E2F8 PE=1 SV=1	FALSE	TRUE	4.95963	4	4	4	867	94.1	High	High	High	High	High	High		0.86	1.387	0.673	0.973333	0.370246	38.039	36.1	31.1	24.4	33.8	48.6	32.7	2	2	2	2	2	2	8.22
High	B4DPD5	Ubiquitin thioesterase OS=Homo sapiens OX=9606 PE=2 SV=1	FALSE	TRUE	18.8312	4	4	4	308	35.2	High	High	High	High	High	High		0.9	1.338	0.685	0.974333	0.332786	34.1552	52.2	47	45.4	60.7	67.3	46.1	3	3	3	3	3	3	10.6
High	Q9BTT4	Mediator of RNA polymerase II transcription subunit 10 OS=Homo sapiens OX=9606 GN=MED10 PE=1 SV=1	FALSE	TRUE	38.5185	4	5	4	135	15.7	High	High	High	High	High	High		0.806	1.357	0.762	0.975	0.331552	34.0054	104.4	84.2	90.9	123.4	154.3	117.5	3	3	3	3	3	3	15.42
High	Q15050	Ribosome biogenesis regulatory protein homolog OS=Homo sapiens OX=9606 GN=RRS1 PE=1 SV=2	FALSE	TRUE	11.2329	4	4	4	365	41.2	High	High	High	High	High	High		0.929	1.187	0.828	0.981333	0.185133	18.8655	35.8	33.3	27.4	32.5	42.5	35.2	2	2	2	2	2	2	10.25
High	Q9NTI5	Sister chromatid cohesion protein PDS5 homolog B OS=Homo sapiens OX=9606 GN=PDS5B PE=1 SV=1	FALSE	TRUE	2.90256	4	4	4	1447	164.6	High	High	High	High	High	High		0.719	1.659	0.608	0.995333	0.577426	58.0133	16.5	11.9	11.1	18.4	15.3	9.3	1	1	1	1	1	1	9.06
High	P46459	Vesicle-fusing ATPase OS=Homo sapiens OX=9606 GN=NSF PE=1 SV=3	FALSE	TRUE	4.97312	4	4	4	744	82.5	High	High	High	High	High	High		1.172	1.358	0.464	0.998	0.471716	47.2661	31	36.4	26.8	36.4	48.1	22.3	2	2	2	2	2	2	10.02
High	Q14320	Protein FAM50A OS=Homo sapiens OX=9606 GN=FAM50A PE=1 SV=2	FALSE	TRUE	12.0944	4	4	4	339	40.2	High	High	High	High	High	High		0.977	1.561	0.486	1.008	0.53817	53.3899	89.5	87.5	68.7	107.3	129.5	63	4	4	4	4	4	4	6.71
High	Q6FHK8	Phosphoglycerate mutase OS=Homo sapiens OX=9606 GN=PGAM1 PE=2 SV=1	FALSE	TRUE	18.8976	4	5	2	254	28.8	High	High	High	High	High	High		0.902	0.693	1.437	1.01067	0.383719	37.9669	94.5	85.3	139.8	96.9	138.6	199.2	2	2	2	2	2	2	14.03
High	A8K3R2	Ribosome biogenesis protein BOP1 OS=Homo sapiens OX=9606 GN=BOP1 PE=2 SV=1	FALSE	TRUE	7.10456	4	4	4	746	83.5	High	High	High	High	High	High		1.042	1.208	0.789	1.013	0.211	20.8292	39.6	41.2	37.8	45.7	52.2	41.2	1	1	1	1	1	1	10.62
High	O75367	Core histone macro-H2A.1 OS=Homo sapiens OX=9606 GN=H2AFY PE=1 SV=4	FALSE	TRUE	17.4731	4	5	3	372	39.6	High	High	High	High	High	High		1.216	1.19	0.641	1.01567	0.324731	31.9722	52.1	63.4	57.7	68.6	88.9	57	3	3	3	3	3	3	12.34
High	Q96NM4	TOX high mobility group box family member 2 OS=Homo sapiens OX=9606 GN=TOX2 PE=2 SV=2	FALSE	TRUE	8.19672	4	6	2	488	51.6	High	High	High	High	High	High		0.714	1.855	0.524	1.031	0.719901	69.8255	21.6	15.4	13.3	24.6	29.2	15.3	1	1	1	1	1	1	19.91
High	Q16777	Histone H2A type 2-C OS=Homo sapiens OX=9606 GN=HIST2H2AC PE=1 SV=4	FALSE	TRUE	31.7829	4	7	3	129	14	High	High	High	High	High	High		0.802	0.444	1.888	1.04467	0.751964	71.9812	221.8	177.9	403.6	179.1	254.9	481.2	3	3	3	3	3	3	20.09
High	A0A140VK41	Testicular secretory protein Li 41 OS=Homo sapiens OX=9606 PE=2 SV=1	FALSE	TRUE	17.134	4	4	1	321	35	Medium	Medium	Medium	Medium	Medium	Medium		1.143	1.539	0.486	1.056	0.531864	50.3659	12.4	14.2	8.3	12.8	22	10.7	1	1	1	1	1	1	9.19
High	Q9H2F5	Enhancer of polycomb homolog 1 OS=Homo sapiens OX=9606 GN=EPC1 PE=1 SV=1	FALSE	TRUE	5.74163	4	4	3	836	93.4	High	High	High	High	High	High		1.048	1.489	0.701	1.07933	0.394933	36.5905	43.4	45.5	35.3	52.6	60.6	42.5	2	2	2	2	2	2	7.62
High	J3KPS3	Fructose-bisphosphate aldolase OS=Homo sapiens OX=9606 GN=ALDOA PE=1 SV=1	TRUE	TRUE	10.8696	4	4	4	368	39.8	High	High	High	High	High	High		1.352	1.208	0.708	1.08933	0.338002	31.0283	16.9	22.8	34.6	41.8	65.4	46.3	2	2	2	2	2	2	10.95
High	O96019	Actin-like protein 6A OS=Homo sapiens OX=9606 GN=ACTL6A PE=1 SV=1	FALSE	TRUE	10.4895	4	4	4	429	47.4	High	High	High	High	High	High		0.971	1.764	0.643	1.126	0.57635	51.1856	72.9	70.7	49.7	87.7	103.9	66.8	2	2	2	2	2	2	8.76
High	Q9HCM4	Band 4.1-like protein 5 OS=Homo sapiens OX=9606 GN=EPB41L5 PE=1 SV=3	FALSE	TRUE	6.54843	4	4	4	733	81.8	High	High	High	High	High	High		0.811	1.233	1.401	1.14833	0.303976	26.471	54.9	44.5	60.6	74.8	57.1	80	3	3	3	3	3	3	10.1
High	B2RBE5	cDNA, FLJ95468, highly similar to Homo sapiens transcriptional coactivator tubedown-100 (TBDN100),transcript variant 1, mRNA OS=Homo sapiens OX=9606 PE=2 SV=1	FALSE	TRUE	4.96536	4	4	4	866	101.2	High	High	High	High	High	High		1.124	1.75	0.642	1.172	0.555557	47.4025	17.2	19.3	13.9	24.3	26	16.7	1	1	1	1	1	1	9.04
High	B7ZLW2	HELZ protein OS=Homo sapiens OX=9606 GN=HELZ PE=2 SV=1	FALSE	TRUE	2.05867	4	4	4	1943	219	High	High	High	High	High	High		1.405	1.423	0.781	1.203	0.365574	30.3885	17.2	24.1	19.2	27.3	30.6	23.9	2	2	2	2	2	2	11.15
High	O15514	DNA-directed RNA polymerase II subunit RPB4 OS=Homo sapiens OX=9606 GN=POLR2D PE=1 SV=1	FALSE	TRUE	38.0282	4	5	4	142	16.3	High	High	High	High	High	High		1.355	1.807	0.738	1.3	0.536618	41.2783	79.5	107.7	60.1	108.6	93.5	69	2	2	2	2	2	2	15.78
High	P02663	Alpha-S2-casein OS=Bos taurus GN=CSN1S2 PE=1 SV=2	TRUE	FALSE	16.6667	4	7	4	222	26	High	High	High	High	High	High		6.073	1.351	4.817	4.08033	2.44568	59.9381	55.2	335.5	78.8	106.5	96.8	466.3	3	3	3	3	3	3	13.26
High	O95373	Importin-7 OS=Homo sapiens OX=9606 GN=IPO7 PE=1 SV=1	FALSE	TRUE	4.81696	4	5	4	1038	119.4	High	High	High	High	High	High					#DIV/0!	#DIV/0!	#DIV/0!													15.26
High	A6NHL2	Tubulin alpha chain-like 3 OS=Homo sapiens OX=9606 GN=TUBAL3 PE=1 SV=2	FALSE	TRUE	9.41704	4	9	1	446	49.9	High	High	High	High	High	High					#DIV/0!	#DIV/0!	#DIV/0!													25.14
High	Q14692	Ribosome biogenesis protein BMS1 homolog OS=Homo sapiens OX=9606 GN=BMS1 PE=1 SV=1	FALSE	TRUE	4.83619	4	4	4	1282	145.7	High	High	High	High	High	High					#DIV/0!	#DIV/0!	#DIV/0!													15.72
High	Q8IWY7	Tau-tubulin kinase 2 OS=Homo sapiens OX=9606 GN=TTBK2 PE=1 SV=1	FALSE	TRUE	1.81928	4	18	1	1649	182.4	High	High	High	High	High	High					#DIV/0!	#DIV/0!	#DIV/0!													33.76
High	B4DZ53	cDNA FLJ59643, highly similar to Neutral alpha-glucosidase AB OS=Homo sapiens OX=9606 PE=2 SV=1	FALSE	TRUE	7.39437	4	4	1	852	96.5	High	High	High	High	High	High					#DIV/0!	#DIV/0!	#DIV/0!													13.29
High	A0A142I7X2	NUP98/PHF23 fusion 2 protein (Fragment) OS=Homo sapiens OX=9606 PE=2 SV=1	FALSE	TRUE	5.08876	4	5	1	845	86.6	High	High	Not Found	High	High	Not Found					#DIV/0!	#DIV/0!	#DIV/0!													11.03
High	B2RAQ8	cDNA, FLJ95058, highly similar to Homo sapiens carnitine palmitoyltransferase 1A (liver) (CPT1A),nuclear gene encoding mitochondrial protein, mRNA OS=Homo sapiens OX=9606 PE=2 SV=1	FALSE	TRUE	6.46831	4	4	4	773	88.3	High	High	High	High	High	High					#DIV/0!	#DIV/0!	#DIV/0!													10.23
High	A0A2K4XGN9	MHC class I antigen OS=Homo sapiens OX=9606 GN=HLA-C PE=3 SV=1	FALSE	TRUE	14.2473	4	4	0	372	41.2	Not Found	Not Found	Not Found	Not Found	Not Found	Not Found					#DIV/0!	#DIV/0!	#DIV/0!													9.98
High	Q14157	Ubiquitin-associated protein 2-like OS=Homo sapiens OX=9606 GN=UBAP2L PE=1 SV=2	FALSE	TRUE	5.24379	4	4	4	1087	114.5	High	High	High	High	High	High					#DIV/0!	#DIV/0!	#DIV/0!													8.22
High	P26038	Moesin OS=Homo sapiens OX=9606 GN=MSN PE=1 SV=3	FALSE	TRUE	5.37262	4	4	1	577	67.8	High	High	High	High	High	High					#DIV/0!	#DIV/0!	#DIV/0!													6.59
High	Q9UKE5	TRAF2 and NCK-interacting protein kinase OS=Homo sapiens OX=9606 GN=TNIK PE=1 SV=1	FALSE	TRUE	2.64706	4	4	1	1360	154.8	High	High	High	High	High	Not Found					#DIV/0!	#DIV/0!	#DIV/0!													9.65
High	O75165	DnaJ homolog subfamily C member 13 OS=Homo sapiens OX=9606 GN=DNAJC13 PE=1 SV=5	FALSE	TRUE	2.31832	4	4	4	2243	254.3	High	High	High	High	High	High					#DIV/0!	#DIV/0!	#DIV/0!													8.25
High	A0A024R2U6	RNA binding motif protein 5, isoform CRA_a OS=Homo sapiens OX=9606 GN=RBM5 PE=4 SV=1	FALSE	TRUE	4.17178	4	5	1	815	92.1	Medium	Medium	Medium	Medium	Medium	Medium					#DIV/0!	#DIV/0!	#DIV/0!													6.61
High	A0A024R9G7	ATPase family, AAA domain containing 2, isoform CRA_c OS=Homo sapiens OX=9606 GN=ATAD2 PE=4 SV=1	FALSE	TRUE	3.09353	4	4	4	1390	158.5	High	High	High	High	High	High					#DIV/0!	#DIV/0!	#DIV/0!													7.82
High	Q9BZZ5	Apoptosis inhibitor 5 OS=Homo sapiens OX=9606 GN=API5 PE=1 SV=3	FALSE	TRUE	7.25191	4	4	4	524	59	High	High	High	High	High	High					#DIV/0!	#DIV/0!	#DIV/0!													9.45
High	Q8IWW6	Rho GTPase-activating protein 12 OS=Homo sapiens OX=9606 GN=ARHGAP12 PE=1 SV=1	FALSE	TRUE	3.30969	3	3	3	846	96.2	High	High	High	High	High	High		0.788	0.79	0.53	0.702667	0.149537	21.2814	15.9	12.5	11.9	9.4	23.2	12.3	1	1	1	1	1	1	8.8
High	Q6IQ16	Speckle-type POZ protein-like OS=Homo sapiens OX=9606 GN=SPOPL PE=1 SV=1	FALSE	TRUE	9.94898	3	3	3	392	44.6	High	High	High	High	High	High		0.736	0.836	0.555	0.709	0.142432	20.0892	57.3	42.1	46.5	38.9	60.9	33.8	2	2	2	2	2	2	5.79
High	A8K322	cDNA FLJ76782, highly similar to Homo sapiens RAD54 homolog B (S. cerevisiae) (RAD54B), transcript variant 1, mRNA OS=Homo sapiens OX=9606 PE=2 SV=1	FALSE	TRUE	3.62637	3	3	3	910	102.9	High	High	High	High	High	High		0.733	0.986	0.442	0.720333	0.272221	37.791	84.5	61.9	74.1	73	118.7	52.5	2	2	2	2	2	2	3.02
High	R4GMW8	BIVM-ERCC5 readthrough OS=Homo sapiens OX=9606 GN=BIVM-ERCC5 PE=1 SV=2	FALSE	TRUE	2.80488	3	3	3	1640	184.3	High	High	High	High	High	High		0.613	1.037	0.514	0.721333	0.277821	38.5149	34.9	21.4	25.1	26	49.2	25.3	2	2	2	2	2	2	12.05
High	A0A1W2PPZ5	Transcription elongation factor A protein 1 OS=Homo sapiens OX=9606 GN=TCEA1 PE=1 SV=1	FALSE	TRUE	9.63455	3	3	3	301	33.9	High	High	High	High	High	High		0.648	1.009	0.514	0.723667	0.256028	35.3793	63.1	40.9	45.9	46.3	73.3	37.7	2	2	2	2	2	2	6.33
High	Q16512	Serine/threonine-protein kinase N1 OS=Homo sapiens OX=9606 GN=PKN1 PE=1 SV=2	FALSE	TRUE	2.33546	3	3	2	942	103.9	High	High	High	High	High	High		0.644	1.106	0.429	0.726333	0.345928	47.6266	24.5	15.8	15.6	17.3	28	12	1	1	1	1	1	1	6.46
High	A0A0A1HAV6	H.sapiens ras-related Hrab3B protein OS=Homo sapiens OX=9606 PE=2 SV=1	FALSE	TRUE	14.1553	3	3	2	219	24.7	High	High	High	High	High	High		0.859	0.769	0.571	0.733	0.147336	20.1005	11.9	10.3	9.6	7.4	14	8	1	1	1	1	1	1	7.22
High	B2RTS4	Centrosomal protein 170kDa OS=Homo sapiens OX=9606 GN=CEP170 PE=2 SV=1	FALSE	TRUE	2.08614	3	3	3	1486	164.5	High	High	High	High	High	High		0.571	1.072	0.557	0.733333	0.293377	40.006	58.3	33.3	42.7	45.8	66.1	36.8	3	3	3	3	3	3	7.88
High	A0A087WVQ6	Clathrin heavy chain OS=Homo sapiens OX=9606 GN=CLTC PE=1 SV=1	FALSE	TRUE	2.50149	3	3	3	1679	191.9	High	High	High	High	High	High		1.013	0.415	0.783	0.737	0.301642	40.9284	15.6	15.8	28.7	11.9	20.3	15.9	1	1	1	1	1	1	6.08
High	Q01167	Forkhead box protein K2 OS=Homo sapiens OX=9606 GN=FOXK2 PE=1 SV=3	FALSE	TRUE	3.63636	3	3	3	660	69	High	High	High	High	High	High		0.707	0.984	0.521	0.737333	0.232986	31.5984	40.6	28.7	28.2	27.8	50.3	26.2	2	2	2	2	2	2	7.35
High	Q9NRL2	Bromodomain adjacent to zinc finger domain protein 1A OS=Homo sapiens OX=9606 GN=BAZ1A PE=1 SV=2	FALSE	TRUE	1.99229	3	3	3	1556	178.6	High	High	High	High	High	High		0.536	1.185	0.518	0.746333	0.380003	50.916	33.9	18.1	20.7	24.5	38.4	19.9	1	1	1	1	1	1	4.5
High	Q8TB61	Adenosine 3'-phospho 5'-phosphosulfate transporter 1 OS=Homo sapiens OX=9606 GN=SLC35B2 PE=1 SV=1	FALSE	TRUE	8.10185	3	3	3	432	47.5	High	High	High	High	High	High		0.547	1.128	0.569	0.748	0.329273	44.0205	82.8	45.3	42.5	47.9	69.6	39.6	2	2	2	2	2	2	6.92
High	Q8NFQ8	Torsin-1A-interacting protein 2 OS=Homo sapiens OX=9606 GN=TOR1AIP2 PE=1 SV=1	FALSE	TRUE	7.02128	3	3	2	470	51.2	High	High	High	High	High	High		0.905	0.732	0.609	0.748667	0.148702	19.8623	16.5	14.9	19.4	14.2	24.3	14.8	1	1	1	1	1	1	7.42
High	D3DQS4	Formin binding protein 4, isoform CRA_d OS=Homo sapiens OX=9606 GN=FNBP4 PE=4 SV=1	FALSE	TRUE	2.26155	3	3	3	1017	110.2	High	High	High	High	High	High		0.712	1	0.54	0.750667	0.232425	30.9625	29.5	21	21.4	21.4	34.1	18.4	2	2	2	2	2	2	5.7
High	Q9NWY4	Histone PARylation factor 1 OS=Homo sapiens OX=9606 GN=HPF1 PE=1 SV=2	FALSE	TRUE	10.4046	3	3	3	346	39.4	High	High	High	High	High	High		0.759	0.971	0.535	0.755	0.218028	28.8778	63.8	48.4	51.6	50.1	78.1	41.8	2	2	2	2	2	2	5.07
High	Q12904	Aminoacyl tRNA synthase complex-interacting multifunctional protein 1 OS=Homo sapiens OX=9606 GN=AIMP1 PE=1 SV=2	FALSE	TRUE	15.7051	3	3	3	312	34.3	High	High	High	High	High	High		0.895	0.805	0.566	0.755333	0.17003	22.5106	38.8	34.7	35.6	28.7	57.2	32.4	1	1	1	1	1	1	11.27
High	Q2YDI2	Origin recognition complex subunit 4 OS=Bos taurus GN=ORC4 PE=2 SV=1	TRUE	FALSE	8.7156	3	3	1	436	50.3	Medium	Medium	Medium	Medium	Medium	Medium		0.671	1.047	0.55	0.756	0.259174	34.2822	123.7	83	93.4	97.8	145.1	79.8	1	1	1	1	1	1	7.13
High	A8KAH1	cDNA FLJ75839, highly similar to Homo sapiens phosphatidylserine synthase 1 (PTDSS1), mRNA OS=Homo sapiens OX=9606 PE=2 SV=1	FALSE	TRUE	9.09091	3	4	3	473	55.4	High	High	High	High	High	High		0.681	0.937	0.65	0.756	0.157515	20.8353	10	6.8	10	9.4	14.3	9.3	1	1	1	1	1	1	11.16
High	P31749	RAC-alpha serine/threonine-protein kinase OS=Homo sapiens OX=9606 GN=AKT1 PE=1 SV=2	FALSE	TRUE	5.83333	3	3	2	480	55.7	High	High	High	High	High	High		0.826	0.923	0.526	0.758333	0.206969	27.2927	70.5	58.2	58.8	54.3	98.4	51.8	2	2	2	2	2	2	7.82
High	A9UK01	Rho GTPase activating protein OS=Homo sapiens OX=9606 PE=2 SV=1	FALSE	TRUE	4.22323	3	4	3	663	74.9	High	High	High	High	High	High		1.005	0.853	0.428	0.762	0.29907	39.2481	26.6	26.7	21.9	18.7	32.7	14	2	2	2	2	2	2	10.8
High	Q9BQB6	Vitamin K epoxide reductase complex subunit 1 OS=Homo sapiens OX=9606 GN=VKORC1 PE=1 SV=1	FALSE	TRUE	12.8834	3	3	3	163	18.2	High	High	High	High	High	High		0.781	0.988	0.525	0.764667	0.231932	30.3311	116.6	91.1	95.2	94.1	149.9	78.7	3	3	3	3	3	3	8.25
High	P62249	40S ribosomal protein S16 OS=Homo sapiens OX=9606 GN=RPS16 PE=1 SV=2	FALSE	TRUE	17.1233	3	3	3	146	16.4	High	High	High	High	High	High		0.829	0.501	0.967	0.765667	0.239369	31.2628	90	74.6	148.6	74.5	113.7	109.9	3	3	3	3	3	3	9.06
High	Q12834	Cell division cycle protein 20 homolog OS=Homo sapiens OX=9606 GN=CDC20 PE=1 SV=2	FALSE	TRUE	6.41283	3	3	3	499	54.7	High	High	High	High	High	High		0.761	0.93	0.609	0.766667	0.160575	20.9446	49.3	37.6	41.1	38.2	59.4	36.2	2	2	2	2	2	2	5.71
High	Q9HAU5	Regulator of nonsense transcripts 2 OS=Homo sapiens OX=9606 GN=UPF2 PE=1 SV=1	FALSE	TRUE	3.30189	3	3	3	1272	147.7	High	High	High	High	High	High		0.894	0.82	0.588	0.767333	0.159654	20.8063	24.3	21.7	22.4	18.4	35.4	20.8	2	2	2	2	2	2	8.78
High	Q9NUQ6	SPATS2-like protein OS=Homo sapiens OX=9606 GN=SPATS2L PE=1 SV=2	FALSE	TRUE	4.83871	3	3	3	558	61.7	High	High	High	High	High	High		0.764	0.952	0.587	0.767667	0.182528	23.7769	53.8	41.1	44.9	42.7	75.3	44.2	1	1	1	1	1	1	2.5
High	Q9UIF9	Bromodomain adjacent to zinc finger domain protein 2A OS=Homo sapiens OX=9606 GN=BAZ2A PE=1 SV=4	FALSE	TRUE	1.83727	3	3	3	1905	211.1	High	High	High	High	High	High		0.857	0.966	0.482	0.768333	0.25389	33.0443	11.8	10.1	9.6	9.3	13.9	6.7	1	1	1	1	1	1	8.52
High	P24390	ER lumen protein-retaining receptor 1 OS=Homo sapiens OX=9606 GN=KDELR1 PE=1 SV=1	FALSE	TRUE	17.9245	3	6	3	212	24.5	High	High	High	High	High	High		0.791	0.967	0.553	0.770333	0.207772	26.9717	96.2	76.1	85.3	82.5	131.7	72.8	2	2	2	2	2	2	14.79
High	O14757	Serine/threonine-protein kinase Chk1 OS=Homo sapiens OX=9606 GN=CHEK1 PE=1 SV=2	FALSE	TRUE	6.30252	3	3	3	476	54.4	High	High	High	High	High	High		0.621	1.097	0.594	0.770667	0.282935	36.713	52.3	32.5	40.7	44.6	60.1	35.7	1	1	1	1	1	1	7.4
High	Q9Y2Q3	Glutathione S-transferase kappa 1 OS=Homo sapiens OX=9606 GN=GSTK1 PE=1 SV=3	FALSE	TRUE	19.9115	3	4	3	226	25.5	High	High	High	High	High	High		0.719	0.92	0.696	0.778333	0.123225	15.8319	56.2	40.4	50.2	46.2	72	50.1	2	2	2	2	2	2	13.74
High	Q9HCJ3	Ribonucleoprotein PTB-binding 2 OS=Homo sapiens OX=9606 GN=RAVER2 PE=1 SV=2	FALSE	TRUE	7.23589	3	3	3	691	74.3	High	High	High	High	High	High		0.72	0.985	0.634	0.779667	0.182949	23.465	14.3	10.3	13.7	13.5	17.5	11.1	1	1	1	1	1	1	10.62
High	P05387	60S acidic ribosomal protein P2 OS=Homo sapiens OX=9606 GN=RPLP2 PE=1 SV=1	FALSE	TRUE	50.4348	3	3	3	115	11.7	High	High	High	High	High	High		0.996	0.499	0.852	0.782333	0.255719	32.6867	54.8	54.6	66.7	33.3	48.6	41.4	2	2	2	2	2	2	8.03
High	P11177	Pyruvate dehydrogenase E1 component subunit beta, mitochondrial OS=Homo sapiens OX=9606 GN=PDHB PE=1 SV=3	FALSE	TRUE	9.47075	3	3	3	359	39.2	High	High	High	High	High	High		0.89	0.895	0.563	0.782667	0.190253	24.3083	26.2	23.3	29.7	26.6	40.3	22.7	2	2	2	2	2	2	8.08
High	Q14008	Cytoskeleton-associated protein 5 OS=Homo sapiens OX=9606 GN=CKAP5 PE=1 SV=3	FALSE	TRUE	1.91929	3	3	3	2032	225.4	High	High	High	High	High	High		0.816	0.813	0.722	0.783667	0.053426	6.81743	36.7	30	27.6	22.4	43.1	31.1	2	2	2	2	2	2	9.02
High	Q9BW27	Nuclear pore complex protein Nup85 OS=Homo sapiens OX=9606 GN=NUP85 PE=1 SV=1	FALSE	TRUE	4.72561	3	3	3	656	75	High	High	High	High	High	High		0.846	0.971	0.534	0.783667	0.22507	28.7201	39.6	33.5	33	32.1	46.8	25	2	2	2	2	2	2	5.43
High	A0A0S2Z5U3	Heterogeneous nuclear ribonucleoprotein L-like isoform 2 (Fragment) OS=Homo sapiens OX=9606 GN=HNRPLL PE=2 SV=1	FALSE	TRUE	6.1082	3	3	2	573	63.6	High	High	High	High	High	High		0.904	0.764	0.683	0.783667	0.111805	14.2669	50.3	45.5	57.2	43.7	67.5	46.1	2	2	2	2	2	2	2.06
High	A8K666	cDNA FLJ75460, highly similar to Homo sapiens phenylalanine-tRNA synthetase-like, beta subunit, mRNA OS=Homo sapiens OX=9606 PE=2 SV=1	FALSE	TRUE	4.24448	3	4	3	589	66	High	High	High	High	High	High		0.874	0.711	0.774	0.786333	0.0821969	10.4532	11.7	10.3	10.8	7.7	15.9	12.3	1	1	1	1	1	1	5.05
High	B4E3W1	cDNA FLJ57204, highly similar to Homo sapiens ancient ubiquitous protein 1 (AUP1), transcript variant 2, mRNA OS=Homo sapiens OX=9606 PE=2 SV=1	FALSE	TRUE	7.06638	3	3	3	467	51	High	High	High	High	High	High		0.666	1.099	0.597	0.787333	0.272107	34.5606	27.3	18.2	19	20.9	29	17.3	1	1	1	1	1	1	5
High	Q5VTL8	Pre-mRNA-splicing factor 38B OS=Homo sapiens OX=9606 GN=PRPF38B PE=1 SV=1	FALSE	TRUE	4.7619	3	3	3	546	64.4	High	High	High	High	High	High		0.662	1.031	0.67	0.787667	0.210771	26.7589	47.4	31.4	35.5	36.6	56	37.5	2	2	2	2	2	2	4.24
High	Q9HC03	Dolichyl-phosphate beta-glucosyltransferase OS=Homo sapiens OX=9606 PE=2 SV=1	FALSE	TRUE	10.1852	3	3	3	324	36.9	High	High	High	High	High	High		0.863	0.96	0.542	0.788333	0.218775	27.7515	35.8	30.9	29	27.8	43.7	23.7	2	2	2	2	2	2	7.93
High	Q8N5M1	ATP synthase mitochondrial F1 complex assembly factor 2 OS=Homo sapiens OX=9606 GN=ATPAF2 PE=1 SV=1	FALSE	TRUE	12.8028	3	3	3	289	32.8	High	High	High	High	High	High		0.901	0.829	0.636	0.788667	0.137027	17.3745	22.9	20.7	23.7	19.6	32.7	20.8	2	2	2	2	2	2	8.14
High	A0A024R7N2	Cation-transporting ATPase OS=Homo sapiens OX=9606 GN=ATP13A1 PE=3 SV=1	FALSE	TRUE	2.15947	3	3	3	1204	132.9	High	High	High	High	High	High		0.844	0.952	0.572	0.789333	0.195809	24.8069	54.3	45.9	38.7	36.9	72.4	41.4	3	3	3	3	3	3	6.15
High	Q76LA1	CSTB protein OS=Homo sapiens OX=9606 GN=CSTB PE=2 SV=1	FALSE	TRUE	30.6122	3	4	3	98	11.1	High	High	High	High	High	High		0.886	0.737	0.749	0.790667	0.0827788	10.4695	103.4	91.6	144.1	106.2	139.6	104.5	3	3	3	3	3	3	11.47
High	Q9P287	BRCA2 and CDKN1A-interacting protein OS=Homo sapiens OX=9606 GN=BCCIP PE=1 SV=1	FALSE	TRUE	15.6051	3	3	3	314	36	High	High	High	High	High	High		0.767	1.013	0.593	0.791	0.211026	26.6784	25.3	19.4	19.7	20	27.3	16.2	1	1	1	1	1	1	8.39
High	Q96G21	U3 small nucleolar ribonucleoprotein protein IMP4 OS=Homo sapiens OX=9606 GN=IMP4 PE=1 SV=1	FALSE	TRUE	12.3711	3	3	3	291	33.7	High	High	High	High	High	High		0.833	0.866	0.675	0.791333	0.10209	12.901	33.4	27.8	27.5	23.8	41.6	28.1	1	1	1	1	1	1	7.17
High	B2RDG1	Fatty acyl-CoA reductase OS=Homo sapiens OX=9606 PE=2 SV=1	FALSE	TRUE	7.76699	3	3	3	515	59.3	High	High	High	High	High	High		0.902	0.787	0.687	0.792	0.107587	13.5842	36.2	32.6	33.2	26.1	48.6	33.4	2	2	2	2	2	2	6.97
High	P25789	Proteasome subunit alpha type-4 OS=Homo sapiens OX=9606 GN=PSMA4 PE=1 SV=1	FALSE	TRUE	9.57854	3	3	3	261	29.5	High	High	High	High	High	High		0.924	0.796	0.661	0.793667	0.131516	16.5706	50.5	46.6	51.3	40.8	65.8	43.5	3	3	3	3	3	3	8.2
High	A0A024R5H6	Phosphofurin acidic cluster sorting protein 1, isoform CRA_a OS=Homo sapiens OX=9606 GN=PACS1 PE=4 SV=1	FALSE	TRUE	4.6729	3	4	3	963	104.8	High	High	High	High	High	High		0.719	1.036	0.629	0.794667	0.21379	26.9032	40.2	28.9	29.5	30.6	48.3	30.4	2	2	2	2	2	2	14.52
High	B2R7W4	cDNA, FLJ93632, highly similar to Homo sapiens heterogeneous nuclear ribonucleoprotein R (HNRPR), mRNA OS=Homo sapiens OX=9606 PE=2 SV=1	FALSE	TRUE	4.42338	3	3	3	633	70.9	High	High	High	High	High	High		0.903	0.77	0.722	0.798333	0.0937674	11.7454	43.5	39.3	48.7	37.5	46.1	33.3	3	3	3	3	3	3	7.31
High	A5YKK6	CCR4-NOT transcription complex subunit 1 OS=Homo sapiens OX=9606 GN=CNOT1 PE=1 SV=2	FALSE	TRUE	1.55724	3	3	3	2376	266.8	High	High	High	High	High	High		0.841	1.037	0.519	0.799	0.261542	32.7336	15.7	13.2	13.6	14.1	21	10.9	1	1	1	1	1	1	6.68
High	A0A024RDR0	High-mobility group box 1, isoform CRA_a OS=Homo sapiens OX=9606 GN=HMGB1 PE=4 SV=1	FALSE	TRUE	9.76744	3	3	2	215	24.9	High	High	High	High	High	High		0.895	0.995	0.515	0.801667	0.253246	31.5899	74.4	66.5	85.7	85.3	121.4	62.5	2	2	2	2	2	2	3.77
High	P46109	Crk-like protein OS=Homo sapiens OX=9606 GN=CRKL PE=1 SV=1	FALSE	TRUE	17.1617	3	4	3	303	33.8	High	High	High	High	High	High		0.889	0.943	0.577	0.803	0.197575	24.6046	27.8	24.7	24.8	23.4	40.9	23.6	2	2	2	2	2	2	9.97
High	P61604	10 kDa heat shock protein, mitochondrial OS=Homo sapiens OX=9606 GN=HSPE1 PE=1 SV=2	FALSE	TRUE	24.5098	3	3	3	102	10.9	High	High	High	High	High	High		1.117	0.704	0.59	0.803667	0.277277	34.5014	33.1	37	50.7	35.7	56.3	33.2	2	2	2	2	2	2	5.92
High	M0R0R2	40S ribosomal protein S5 OS=Homo sapiens OX=9606 GN=RPS5 PE=1 SV=1	FALSE	TRUE	14.6667	3	3	3	225	25.3	High	High	High	High	High	High		0.847	0.579	0.987	0.804333	0.207319	25.7753	61.8	52.4	92.1	53.3	83.4	82.3	2	2	2	2	2	2	8.49
High	P81605	Dermcidin OS=Homo sapiens OX=9606 GN=DCD PE=1 SV=2	FALSE	TRUE	21.8182	3	3	2	110	11.3	High	High	High	High	High	High		0.57	1.312	0.533	0.805	0.439464	54.5919	81.7	46.6	41.1	53.9	69.6	37.1	2	2	2	2	2	2	4.93
High	O15111	Inhibitor of nuclear factor kappa-B kinase subunit alpha OS=Homo sapiens OX=9606 GN=CHUK PE=1 SV=2	FALSE	TRUE	4.56376	3	3	3	745	84.6	High	High	High	High	High	High		0.95	0.899	0.567	0.805333	0.207972	25.8243	35.3	33.5	37.4	33.6	51.7	29.3	1	1	1	1	1	1	3.41
High	A0A0D9SF58	Chromosome transmission fidelity protein 18 homolog OS=Homo sapiens OX=9606 GN=CHTF18 PE=1 SV=1	FALSE	TRUE	2.36486	3	3	3	1184	129.3	High	High	High	High	High	High		0.83	1.086	0.503	0.806333	0.29222	36.2406	43.5	36.1	32.4	35.2	55.7	28	2	2	2	2	2	2	2.2
High	Q969S3	Zinc finger protein 622 OS=Homo sapiens OX=9606 GN=ZNF622 PE=1 SV=1	FALSE	TRUE	5.87002	3	3	3	477	54.2	High	High	High	High	High	High		0.794	0.95	0.676	0.806667	0.137438	17.0378	55.3	43.9	44.7	42.5	59.5	40.2	2	2	2	2	2	2	2.29
High	Q96BD5	PHD finger protein 21A OS=Homo sapiens OX=9606 GN=PHF21A PE=1 SV=1	FALSE	TRUE	3.67647	3	3	3	680	74.8	High	High	High	High	High	High		0.822	1.091	0.508	0.807	0.291789	36.1573	36.1	29.7	32.4	35.3	59.3	30.1	1	1	1	1	1	1	2.88
High	Q9Y3U8	60S ribosomal protein L36 OS=Homo sapiens OX=9606 GN=RPL36 PE=1 SV=3	FALSE	TRUE	23.8095	3	5	3	105	12.2	High	High	High	High	High	High		0.769	0.975	0.677	0.807	0.152591	18.9084	137.3	105.6	114.4	111.5	174.8	118.4	3	3	3	3	3	3	13.23
High	Q53HV2	Chaperonin containing TCP1, subunit 7 (Eta) variant (Fragment) OS=Homo sapiens OX=9606 PE=2 SV=1	FALSE	TRUE	5.70902	3	3	3	543	59.3	High	High	High	High	High	High		0.781	0.775	0.869	0.808333	0.0526245	6.51024	30.9	24.2	29.8	23.1	30.6	26.6	1	1	1	1	1	1	6.94
High	D6RBW1	Eukaryotic translation initiation factor 4E OS=Homo sapiens OX=9606 GN=EIF4E PE=1 SV=1	FALSE	TRUE	13.0612	3	3	3	245	28.5	High	High	High	High	High	High		0.849	0.976	0.601	0.808667	0.190726	23.5852	49.5	42	41.7	40.7	56.6	34	2	2	2	2	2	2	7.42
High	Q9BUK6	Protein misato homolog 1 OS=Homo sapiens OX=9606 GN=MSTO1 PE=1 SV=1	FALSE	TRUE	4.5614	3	3	3	570	61.8	High	High	High	High	High	High		0.841	0.939	0.65	0.81	0.146973	18.1448	49.5	41.6	45.4	42.6	60.6	39.4	2	2	2	2	2	2	4.19
High	Q14807	Kinesin-like protein KIF22 OS=Homo sapiens OX=9606 GN=KIF22 PE=1 SV=5	FALSE	TRUE	5.11278	3	4	3	665	73.2	High	High	High	High	High	High		0.88	1.026	0.531	0.812333	0.254343	31.3102	77.5	68.1	68.6	70.4	109	57.9	2	2	2	2	2	2	8.62
High	A6NJ78	Probable methyltransferase-like protein 15 OS=Homo sapiens OX=9606 GN=METTL15 PE=1 SV=1	FALSE	TRUE	8.35381	3	3	3	407	46.1	High	High	High	High	High	High		0.757	1.19	0.492	0.813	0.352354	43.3399	14.4	10.9	8.4	10	18.9	9.3	1	1	1	1	1	1	5.39
High	Q03701	CCAAT/enhancer-binding protein zeta OS=Homo sapiens OX=9606 GN=CEBPZ PE=1 SV=3	FALSE	TRUE	3.70019	3	3	3	1054	120.9	High	High	High	High	High	High		0.796	1.005	0.645	0.815333	0.180777	22.1722	73	58.1	56.3	56.6	81.9	52.8	2	2	2	2	2	2	8.12
High	Q16380	Metastasis-associated gene protein (Fragment) OS=Homo sapiens OX=9606 GN=metastasis-associated gene PE=2 SV=1	FALSE	TRUE	33.0189	3	14	1	106	11.8	High	High	High	High	High	High	Acetyl [N-Term]	1.03	0.846	0.573	0.816333	0.22994	28.1674	27.9	28.8	27.4	23.2	44.7	25.6	1	1	1	1	1	1	25.93
High	Q8N122	Regulatory-associated protein of mTOR OS=Homo sapiens OX=9606 GN=RPTOR PE=1 SV=1	FALSE	TRUE	2.69663	3	3	3	1335	148.9	High	High	High	High	High	High		0.967	0.951	0.534	0.817333	0.245504	30.0372	29.5	28.5	26.8	25.5	43.6	23.3	1	1	1	1	1	1	6.07
High	A8K4P8	cDNA FLJ75337 OS=Homo sapiens OX=9606 PE=2 SV=1	FALSE	TRUE	2.62467	3	3	3	1524	170.4	High	High	High	High	High	High		0.891	0.905	0.661	0.819	0.137011	16.7291	30.9	27.5	29.4	26.6	36	23.8	1	1	1	1	1	1	6.69
High	A0A024R5X3	SAFB-like, transcription modulator, isoform CRA_b OS=Homo sapiens OX=9606 GN=SLTM PE=4 SV=1	FALSE	TRUE	3.25342	3	3	3	1168	131.5	High	High	High	High	High	High		0.7	1.088	0.669	0.819	0.233476	28.5074	36.7	25.7	25.4	27.6	39.3	26.3	1	1	1	1	1	1	8.16
High	O95707	Ribonuclease P protein subunit p29 OS=Homo sapiens OX=9606 GN=POP4 PE=1 SV=2	FALSE	TRUE	17.7273	3	4	3	220	25.4	High	High	High	High	High	High		0.846	1.063	0.55	0.819667	0.257512	31.4167	60.9	51.5	44.6	47.4	83.1	45.7	3	3	3	3	3	3	11.99
High	O95551	Tyrosyl-DNA phosphodiesterase 2 OS=Homo sapiens OX=9606 GN=TDP2 PE=1 SV=1	FALSE	TRUE	8.56354	3	3	3	362	40.9	High	High	High	High	High	High		0.894	1.098	0.469	0.820333	0.320905	39.1189	85	76	68.8	75.5	124.2	58.3	3	3	3	3	3	3	6.29
High	A0A087X1R1	Smoothelin OS=Homo sapiens OX=9606 GN=SMTN PE=1 SV=1	FALSE	TRUE	2.99401	3	3	3	1002	108	High	High	High	High	High	High		0.943	0.941	0.585	0.823	0.206116	25.0445	22.8	21.5	23.1	21.7	37.1	21.7	2	2	2	2	2	2	7.54
High	A0A0D9SF60	Plakophilin-4 OS=Homo sapiens OX=9606 GN=PKP4 PE=1 SV=1	FALSE	TRUE	2.2351	3	3	3	1208	133.9	High	High	High	High	High	High		0.763	0.894	0.813	0.823333	0.0661085	8.02937	45.9	35	28.3	25.3	36.8	29.9	2	2	2	2	2	2	4.1
High	A0A2Y9D025	NADH dehydrogenase [ubiquinone] 1 alpha subcomplex subunit 6 OS=Homo sapiens OX=9606 GN=NDUFA6 PE=4 SV=1	FALSE	TRUE	15.5844	3	3	3	154	17.9	High	High	High	High	High	High		1.051	0.712	0.726	0.829667	0.191808	23.1187	64.4	67.6	100.8	71.8	79.3	57.6	3	3	3	3	3	3	5.3
High	Q05519	Serine/arginine-rich splicing factor 11 OS=Homo sapiens OX=9606 GN=SRSF11 PE=1 SV=1	FALSE	TRUE	5.16529	3	3	3	484	53.5	High	High	High	High	High	High		0.769	1.112	0.608	0.829667	0.257419	31.0267	114.1	87.7	95.5	106.2	158.7	96.5	3	3	3	3	3	3	4.21
High	H0YMV8	40S ribosomal protein S27 OS=Homo sapiens OX=9606 GN=RPS27L PE=1 SV=1	FALSE	TRUE	32	3	4	1	100	11.3	High	High	High	High	High	High		1.058	0.73	0.704	0.830667	0.197305	23.7526	75.7	80.1	127	92.7	109.8	77.3	3	3	3	3	3	3	12.25
High	Q8IWA0	WD repeat-containing protein 75 OS=Homo sapiens OX=9606 GN=WDR75 PE=1 SV=1	FALSE	TRUE	4.45783	3	3	3	830	94.4	High	High	High	High	High	High		0.766	0.96	0.766	0.830667	0.112006	13.4839	34.5	26.4	24.4	23.4	34.6	26.5	2	2	2	2	2	2	8.5
High	Q8N0Y7	Probable phosphoglycerate mutase 4 OS=Homo sapiens OX=9606 GN=PGAM4 PE=3 SV=1	FALSE	TRUE	15.748	3	4	1	254	28.8	High	High	High	High	High	High	Biotin [K228; K241]	0.882	1.067	0.546	0.831667	0.264122	31.7581	13.6	12	13.3	14.2	19.6	10.7	1	1	1	1	1	1	8.41
High	A0A140VJK2	Glycerol-3-phosphate dehydrogenase OS=Homo sapiens OX=9606 PE=2 SV=1	FALSE	TRUE	4.67675	3	3	3	727	80.8	High	High	High	High	High	High		0.749	1.092	0.656	0.832333	0.229635	27.5893	37.2	27.9	34.3	37.4	43	28.2	1	1	1	1	1	1	8.41
High	A0A024R1K7	Tyrosine 3-monooxygenase/tryptophan 5-monooxygenase activation protein, eta polypeptide, isoform CRA_b OS=Homo sapiens OX=9606 GN=YWHAH PE=3 SV=1	FALSE	TRUE	10.1626	3	3	1	246	28.2	High	High	High	High	High	High		0.619	1.174	0.705	0.832667	0.298714	35.8744	14.2	8.8	12	14.1	18.3	12.9	1	1	1	1	1	1	5.07
High	A0A024RD35	Elongation of very long chain fatty acids protein 5 OS=Homo sapiens OX=9606 GN=ELOVL5 PE=3 SV=1	FALSE	TRUE	7.69231	3	5	3	299	35.3	High	High	High	High	High	High		0.759	1.09	0.653	0.834	0.22795	27.3321	104.1	79.1	89.8	97.9	129.1	84.3	2	2	2	2	2	2	8.41
High	A0A0K0K1K4	Proteasome subunit alpha type OS=Homo sapiens OX=9606 GN=HEL-S-276 PE=2 SV=1	FALSE	TRUE	13.7097	3	3	3	248	27.9	High	High	High	High	High	High		1.197	0.772	0.537	0.835333	0.334527	40.0471	8.7	10.4	13.3	10.3	16.2	8.7	1	1	1	1	1	1	7.51
High	Q53F02	Cleavage and polyadenylation specific factor 3, 73kDa variant (Fragment) OS=Homo sapiens OX=9606 PE=2 SV=1	FALSE	TRUE	5.26316	3	3	3	684	77.4	High	High	High	High	High	High		0.932	0.986	0.588	0.835333	0.215892	25.845	25.1	23.4	24.7	24.4	33.5	19.7	2	2	2	2	2	2	8.05
High	Q8N684	Cleavage and polyadenylation specificity factor subunit 7 OS=Homo sapiens OX=9606 GN=CPSF7 PE=1 SV=1	FALSE	TRUE	6.58174	3	3	3	471	52	High	High	High	High	High	High		0.756	1.136	0.622	0.838	0.266631	31.8175	87.9	66.5	70.4	80	113.4	70.5	2	2	2	2	2	2	7.43
High	Q8WVX7	Ribosomal protein S19 (Fragment) OS=Homo sapiens OX=9606 PE=2 SV=1	FALSE	TRUE	16.5605	3	3	3	157	17.3	High	High	High	High	High	High		0.773	0.477	1.268	0.839333	0.39965	47.6152	28.9	22.3	48.8	23.3	31.4	39.8	2	2	2	2	2	2	7.11
High	A0A0F7KYT8	Fragile X mental retardation autosomal homolog variant p2K OS=Homo sapiens OX=9606 GN=FXR1 PE=2 SV=1	FALSE	TRUE	5.31758	3	3	3	677	76.2	High	High	High	High	High	High		0.878	1.004	0.643	0.841667	0.183222	21.769	63.9	56.1	58.8	59	93.5	60.1	2	2	2	2	2	2	8.98
High	Q6IN85	Serine/threonine-protein phosphatase 4 regulatory subunit 3A OS=Homo sapiens OX=9606 GN=PPP4R3A PE=1 SV=1	FALSE	TRUE	4.08163	3	4	1	833	95.3	High	High	High	High	High	High		0.82	1.051	0.655	0.842	0.198915	23.6241	29.4	24.1	27.1	28.5	37.1	24.3	1	1	1	1	1	1	12.1
High	A0A0A0MQS1	Pyrroline-5-carboxylate reductase OS=Homo sapiens OX=9606 GN=PYCR3 PE=1 SV=1	FALSE	TRUE	10.4895	3	3	3	286	29.9	High	High	High	High	High	High		0.832	1.057	0.638	0.842333	0.209691	24.8941	34	28.3	30.4	32.1	44.8	28.6	1	1	1	1	1	1	9.43
High	A8KA19	cDNA FLJ75831, highly similar to Homo sapiens exportin, tRNA (nuclear export receptor for tRNAs) (XPOT), mRNA OS=Homo sapiens OX=9606 PE=2 SV=1	FALSE	TRUE	3.01455	3	3	3	962	109.8	High	High	High	High	High	High		0.789	1.057	0.687	0.844333	0.191106	22.6339	15.6	12.3	10.6	11.2	19.5	13.4	1	1	1	1	1	1	7.14
High	P23526	Adenosylhomocysteinase OS=Homo sapiens OX=9606 GN=AHCY PE=1 SV=4	FALSE	TRUE	11.3426	3	3	3	432	47.7	High	High	High	High	High	High		0.91	0.814	0.814	0.846	0.0554256	6.55149	100.4	91.3	136	110.8	144.9	117.9	2	2	2	2	2	2	7.51
High	O95881	Thioredoxin domain-containing protein 12 OS=Homo sapiens OX=9606 GN=TXNDC12 PE=1 SV=1	FALSE	TRUE	25.5814	3	3	3	172	19.2	High	High	High	High	High	High		0.787	1.017	0.741	0.848333	0.147869	17.4306	52.5	41.3	44.1	44.8	67.9	50.3	2	2	2	2	2	2	12.14
High	C9JRZ6	MICOS complex subunit OS=Homo sapiens OX=9606 GN=CHCHD3 PE=1 SV=2	FALSE	TRUE	12.5	3	3	3	232	26.7	High	High	High	High	High	High		0.954	0.994	0.605	0.851	0.213979	25.1444	50.4	48.1	49.3	49	70.3	42.5	3	3	3	3	3	3	7.02
High	O75616	GTPase Era, mitochondrial OS=Homo sapiens OX=9606 GN=ERAL1 PE=1 SV=2	FALSE	TRUE	8.23799	3	3	3	437	48.3	High	High	High	High	High	High		0.766	1.3	0.494	0.853333	0.410036	48.0511	37.8	29	26.9	34.9	45.3	22.4	2	2	2	2	2	2	9.4
High	O75821	Eukaryotic translation initiation factor 3 subunit G OS=Homo sapiens OX=9606 GN=EIF3G PE=1 SV=2	FALSE	TRUE	11.5625	3	3	3	320	35.6	High	High	High	High	High	High		0.983	0.98	0.599	0.854	0.220842	25.8597	64.2	63.1	63.7	62.4	90	53.9	2	2	2	2	2	2	11.08
High	A0A024R8A2	GTPase activating protein and VPS9 domains 1, isoform CRA_d OS=Homo sapiens OX=9606 GN=GAPVD1 PE=4 SV=1	FALSE	TRUE	2.21923	3	3	3	1487	166.1	High	High	High	High	High	High		0.977	0.991	0.595	0.854333	0.224698	26.301	34.2	33.4	30.8	30.5	44.9	26.7	2	2	2	2	2	2	7.78
High	Q5SQP8	C-terminal-binding protein 2 OS=Homo sapiens OX=9606 GN=CTBP2 PE=1 SV=1	FALSE	TRUE	5.65302	3	4	1	513	56.1	High	High	High	High	High	High		0.967	0.98	0.62	0.855667	0.204197	23.8641	17.8	17.2	14.5	14.2	21.6	13.4	1	1	1	1	1	1	10.33
High	Q3MHD2	Protein LSM12 homolog OS=Homo sapiens OX=9606 GN=LSM12 PE=1 SV=2	FALSE	TRUE	13.8462	3	3	3	195	21.7	High	High	High	High	High	High		0.958	1.099	0.515	0.857333	0.304736	35.5447	40.5	38.8	32	35.2	55.7	28.7	1	1	1	1	1	1	7.74
High	Q86YQ0	HZGJ OS=Homo sapiens OX=9606 GN=HZGJ PE=2 SV=1	FALSE	TRUE	3.13725	3	3	3	765	84.7	High	High	High	High	High	High		0.777	1.163	0.632	0.857333	0.274464	32.0137	27.4	21.3	23.8	27.7	34.8	22	2	2	2	2	2	2	6.48
High	A0A090N8G7	Similar to RP9 protein OS=Homo sapiens OX=9606 GN=LOC402478 PE=4 SV=1	FALSE	TRUE	11.4286	3	4	3	315	36.4	High	High	High	High	High	High		0.795	1.15	0.639	0.861333	0.261878	30.4038	75.3	59.9	58	66.7	91.4	58.4	2	2	2	2	2	2	10.75
High	A0A024R3U8	Uncharacterized protein OS=Homo sapiens OX=9606 GN=FLJ22555 PE=4 SV=1	FALSE	TRUE	11.3402	3	3	3	291	32.5	High	High	High	High	High	High		0.706	1.21	0.67	0.862	0.301914	35.0248	41	29	29.3	35.5	50.9	34.1	1	1	1	1	1	1	4.87
High	A4D0P7	Origin recognition complex, subunit 5-like (Yeast), isoform CRA_b OS=Homo sapiens OX=9606 GN=ORC5L PE=1 SV=1	FALSE	TRUE	7.58621	3	3	3	435	50.3	High	High	High	High	High	High		1.084	0.934	0.569	0.862333	0.264874	30.716	27.7	30	26.2	24.5	42	23.9	1	1	1	1	1	1	8.59
High	A8K1K8	Chromosome 18 open reading frame 55, isoform CRA_b OS=Homo sapiens OX=9606 GN=C18orf55 PE=2 SV=1	FALSE	TRUE	12.9032	3	3	3	248	28.2	High	High	High	High	High	High		0.867	1.151	0.573	0.863667	0.289014	33.4637	65.1	56.4	49.2	56.6	84.3	48.3	3	3	3	3	3	3	5.26
High	B2R6H3	Kinesin-like protein OS=Homo sapiens OX=9606 PE=2 SV=1	FALSE	TRUE	2.67261	3	3	3	898	102.1	High	High	High	High	High	High		0.895	0.964	0.738	0.865667	0.11582	13.3793	35.3	31.6	32.8	31.6	52.2	38.5	2	2	2	2	2	2	7.08
High	Q9H8V3	Protein ECT2 OS=Homo sapiens OX=9606 GN=ECT2 PE=1 SV=4	FALSE	TRUE	3.17287	3	3	3	914	103.4	High	High	High	High	High	High		0.845	1.066	0.688	0.866333	0.189901	21.9201	56.3	47.5	51.3	54.7	71.7	49.3	2	2	2	2	2	2	7.52
High	P51948	CDK-activating kinase assembly factor MAT1 OS=Homo sapiens OX=9606 GN=MNAT1 PE=1 SV=1	FALSE	TRUE	11.0032	3	3	3	309	35.8	High	High	High	High	High	High		0.735	1.327	0.555	0.872333	0.403908	46.302	51.3	37.7	37.4	49.6	64.7	35.9	2	2	2	2	2	2	10.89
High	B3KMS0	Condensin complex subunit 1 OS=Homo sapiens OX=9606 PE=2 SV=1	FALSE	TRUE	1.92719	3	3	3	1401	157.1	High	High	High	High	High	High		0.829	1.11	0.68	0.873	0.218351	25.0115	24	19.9	18.6	20.7	33.8	23	2	2	2	2	2	2	7.85
High	Q8ND82	Zinc finger protein 280C OS=Homo sapiens OX=9606 GN=ZNF280C PE=1 SV=1	FALSE	TRUE	4.34193	3	3	3	737	83	High	High	High	High	High	High		0.944	1.108	0.569	0.873667	0.276298	31.6251	48.3	45.6	41	45.4	71	40.4	2	2	2	2	2	2	4.28
High	Q92771	Putative ATP-dependent RNA helicase DDX12 OS=Homo sapiens OX=9606 GN=DDX12P PE=5 SV=3	FALSE	TRUE	3.26316	3	3	1	950	105.9	High	High	High	High	High	High		1.15	0.912	0.565	0.875667	0.294188	33.5958	12	13.8	11.6	10.6	19.1	10.8	1	1	1	1	1	1	7.83
High	Q96FC9	ATP-dependent DNA helicase DDX11 OS=Homo sapiens OX=9606 GN=DDX11 PE=1 SV=1	FALSE	TRUE	3.40206	3	3	1	970	108.2	Medium	Medium	Medium	Medium	Medium	Medium		1	1.089	0.541	0.876667	0.294082	33.5455	13.8	13.8	11.1	12.1	21.8	11.8	1	1	1	1	1	1	7.33
High	B3KPM8	cDNA FLJ31974 fis, clone NT2RP7008167, weakly similar to 85.1 kDa PROTEIN IN GREB-FEOA INTERGENIC REGION OS=Homo sapiens OX=9606 PE=2 SV=1	FALSE	TRUE	3.31658	3	3	3	995	111.7	High	High	High	High	High	High		0.868	1.164	0.608	0.88	0.278194	31.613	42	36.4	33.3	38.8	60.9	37	1	1	1	1	1	1	4.9
High	M0QXB4	Coatomer protein complex, subunit epsilon, isoform CRA_g OS=Homo sapiens OX=9606 GN=COPE PE=1 SV=1	FALSE	TRUE	14.5015	3	3	3	331	36.9	High	High	High	High	High	High		0.837	1.1	0.704	0.880333	0.201525	22.8919	45.6	38.2	34.9	38.4	62.4	43.9	2	2	2	2	2	2	8.98
High	E9KL48	Epididymis tissue sperm binding protein Li 18mP OS=Homo sapiens OX=9606 GN=GLUD1 PE=2 SV=1	TRUE	TRUE	6.09319	3	3	3	558	61.4	High	High	High	High	High	High		0.983	0.928	0.732	0.881	0.131936	14.9757	79.2	77.8	78.6	72.9	107.7	78.8	3	3	3	3	3	3	4.84
High	Q5MIZ7	Serine/threonine-protein phosphatase 4 regulatory subunit 3B OS=Homo sapiens OX=9606 GN=PPP4R3B PE=1 SV=2	FALSE	TRUE	3.53357	3	4	1	849	97.4	Medium	Medium	Medium	Medium	Medium	Medium		0.9	1.148	0.601	0.883	0.273896	31.0188	21.1	19	17.2	19.7	32.8	19.7	1	1	1	1	1	1	10.66
High	P08559	Pyruvate dehydrogenase E1 component subunit alpha, somatic form, mitochondrial OS=Homo sapiens OX=9606 GN=PDHA1 PE=1 SV=3	FALSE	TRUE	8.71795	3	3	3	390	43.3	High	High	High	High	High	High		0.942	0.861	0.847	0.883333	0.0512868	5.80605	25.6	24.2	24.6	21.2	28.7	24.3	1	1	1	1	1	1	7.57
High	B2RNR6	Zinc finger RNA binding protein OS=Homo sapiens OX=9606 GN=ZFR PE=2 SV=1	FALSE	TRUE	2.88641	3	3	3	1074	116.9	High	High	High	High	High	High		0.966	1.058	0.638	0.887333	0.220774	24.8807	70.7	68.3	65	68.8	109.1	69.6	2	2	2	2	2	2	5.4
High	B4DRS6	Sideroflexin OS=Homo sapiens OX=9606 PE=2 SV=1	FALSE	TRUE	12.1581	3	3	2	329	36.3	High	High	High	High	High	High		1.033	1.013	0.618	0.888	0.234041	26.3559	39.4	40.7	36.3	36.8	53.7	33.2	2	2	2	2	2	2	8.88
High	Q96JM7	Lethal(3)malignant brain tumor-like protein 3 OS=Homo sapiens OX=9606 GN=L3MBTL3 PE=1 SV=2	FALSE	TRUE	3.97436	3	3	3	780	88.3	High	High	High	High	High	High		0.838	1.201	0.633	0.890667	0.287639	32.2948	57.3	48	45.7	54.9	84	53.2	2	2	2	2	2	2	5.35
High	A0A024RB14	40S ribosomal protein S26 OS=Homo sapiens OX=9606 GN=RPS26 PE=3 SV=1	FALSE	TRUE	26.9565	3	4	3	115	13	High	High	High	High	High	High		0.97	0.94	0.764	0.891333	0.111289	12.4857	139.3	135.1	133.2	125.2	178.9	136.6	2	2	2	2	2	2	8.41
High	F8WCT1	ADP-ribosylation factor-like protein 6-interacting protein 4 OS=Homo sapiens OX=9606 GN=ARL6IP4 PE=1 SV=1	FALSE	TRUE	17.9039	3	4	3	229	25.6	High	High	High	High	High	High		0.904	1.162	0.613	0.893	0.274665	30.7576	60.6	54.7	49.4	57.4	91.7	56.2	3	3	3	3	3	3	9.84
High	I3VM53	F-box and leucine-rich repeat protein 11, isoform CRA_a OS=Homo sapiens OX=9606 GN=KDM2A PE=2 SV=1	FALSE	TRUE	2.75387	3	3	3	1162	132.7	High	High	High	High	High	High		0.862	1.173	0.652	0.895667	0.262127	29.2661	35.7	30.8	26.2	30.7	44.3	28.9	1	1	1	1	1	1	9.58
High	A0A087WUT6	Eukaryotic translation initiation factor 5B OS=Homo sapiens OX=9606 GN=EIF5B PE=1 SV=1	FALSE	TRUE	3.52459	3	3	3	1220	138.6	High	High	High	High	High	High		0.894	1.183	0.615	0.897333	0.284015	31.651	18.1	16.2	16	18.9	21.8	13.4	1	1	1	1	1	1	7.91
High	A0A087WZT2	Methyltransferase-like protein 7B OS=Homo sapiens OX=9606 GN=METTL7B PE=1 SV=1	FALSE	TRUE	10.5072	3	3	3	276	31.3	High	High	High	High	High	High		0.956	0.966	0.773	0.898333	0.108657	12.0954	77.4	74	73.4	70.9	97.7	75.5	3	3	3	3	3	3	4.12
High	Q66LE6	Serine/threonine-protein phosphatase 2A 55 kDa regulatory subunit B delta isoform OS=Homo sapiens OX=9606 GN=PPP2R2D PE=1 SV=1	FALSE	TRUE	5.29801	3	3	3	453	52	High	High	High	High	High	High		0.806	1.049	0.841	0.898667	0.131363	14.6176	43.9	35.4	32.1	33.7	41.6	35	2	2	2	2	2	2	6.5
High	P27144	Adenylate kinase 4, mitochondrial OS=Homo sapiens OX=9606 GN=AK4 PE=1 SV=1	FALSE	TRUE	14.3498	3	3	3	223	25.3	High	High	High	High	High	High		1.105	0.954	0.649	0.902667	0.232294	25.7342	14.3	15.8	13.1	12.5	23.9	15.5	1	1	1	1	1	1	7.63
High	Q9NUU6	Inactive ubiquitin thioesterase FAM105A OS=Homo sapiens OX=9606 GN=FAM105A PE=2 SV=1	FALSE	TRUE	4.49438	3	3	3	356	42.2	High	High	High	High	High	High		1.065	0.813	0.834	0.904	0.139825	15.4674	14.1	15	18.8	15.3	18.1	15.1	1	1	1	1	1	1	5.98
High	B2R921	cDNA, FLJ94171, highly similar to Homo sapiens solute carrier family 25 (mitochondrial carrier; ornithine transporter) member 15 (SLC25A15), nuclear gene encoding mitochondrial protein, mRNA OS=Homo sapiens OX=9606 PE=2 SV=1	FALSE	TRUE	7.97342	3	3	3	301	32.8	High	High	High	High	High	High		0.873	1.26	0.582	0.905	0.340131	37.5835	17.5	15.3	14.3	18	25.1	14.6	1	1	1	1	1	1	7.82
High	B4E290	cDNA FLJ50039, highly similar to Homo sapiens solute carrier family 25, member 24, transcript variant 1, mRNA OS=Homo sapiens OX=9606 PE=2 SV=1	FALSE	TRUE	6.28931	3	3	3	477	53.3	High	High	High	High	High	High		0.98	0.964	0.773	0.905667	0.115171	12.7167	24.2	23.8	23.6	22.8	33.1	25.6	1	1	1	1	1	1	7.47
High	H9KVB4	Trinucleotide repeat-containing gene 18 protein OS=Homo sapiens OX=9606 GN=TNRC18 PE=1 SV=1	FALSE	TRUE	1.07817	3	3	3	2968	314.3	High	High	High	High	High	High		0.814	1.252	0.66	0.908667	0.307144	33.8016	57.4	46.8	41.2	51.6	69.5	45.9	1	1	1	1	1	1	8.65
High	E7EWW0	VPS35 endosomal protein sorting factor-like OS=Homo sapiens OX=9606 GN=VPS35L PE=1 SV=2	FALSE	TRUE	3.327	3	3	3	1052	118.5	High	High	High	High	High	High		0.845	1.184	0.7	0.909667	0.248396	27.3062	38.9	32.9	29.1	34.5	48.4	33.9	2	2	2	2	2	2	6.07
High	A0A1U9X7R2	GNL1 OS=Homo sapiens OX=9606 PE=4 SV=1	FALSE	TRUE	5.10708	3	3	3	607	68.6	High	High	High	High	High	High		0.927	1.147	0.668	0.914	0.239764	26.2324	82.8	76.8	73.9	84.7	108.5	72.5	2	2	2	2	2	2	6.57
High	Q14232	Translation initiation factor eIF-2B subunit alpha OS=Homo sapiens OX=9606 GN=EIF2B1 PE=1 SV=1	FALSE	TRUE	9.83607	3	3	3	305	33.7	High	High	High	High	High	High		1.173	1.035	0.537	0.915	0.33455	36.5629	35.8	42	32.1	33.2	63	33.8	2	2	2	2	2	2	7
High	A0A024R4X7	HCG1989366, isoform CRA_a OS=Homo sapiens OX=9606 GN=hCG_1989366 PE=4 SV=1	FALSE	TRUE	8.33333	3	3	3	468	50.1	High	High	High	High	High	High		0.772	1.265	0.708	0.915	0.304793	33.3108	32.2	24.9	26.1	33	40.7	28.8	1	1	1	1	1	1	8.5
High	B2RD19	cDNA, FLJ96419, highly similar to Homo sapiens fructosamine-3-kinase-related protein (FN3KRP), mRNA OS=Homo sapiens OX=9606 PE=2 SV=1	FALSE	TRUE	11.6505	3	4	3	309	34.3	High	High	High	High	High	High		0.906	1.06	0.796	0.920667	0.13261	14.4037	45.8	41.5	44.6	47.3	54	43	2	2	2	2	2	2	10.34
High	Q4G176	Acyl-CoA synthetase family member 3, mitochondrial OS=Homo sapiens OX=9606 GN=ACSF3 PE=1 SV=3	FALSE	TRUE	4.34028	3	3	2	576	64.1	High	High	High	High	High	High		0.81	1.062	0.891	0.921	0.128651	13.9686	23.7	19.2	18.5	19.7	23	20.5	1	1	1	1	1	1	6.97
High	H0YAA8	Mediator of RNA polymerase II transcription subunit 28 (Fragment) OS=Homo sapiens OX=9606 GN=MED28 PE=1 SV=1	FALSE	TRUE	16.2011	3	3	3	179	19.6	High	High	High	High	High	High		0.92	1.219	0.626	0.921667	0.296504	32.1704	87.7	80.7	76.7	93.5	134.1	84	3	3	3	3	3	3	3.47
High	A0A087X020	Ribosome maturation protein SBDS OS=Homo sapiens OX=9606 GN=SBDS PE=1 SV=1	FALSE	TRUE	9.2	3	3	3	250	28.8	High	High	High	High	High	High		1.068	1.149	0.553	0.923333	0.323265	35.0107	29.3	31.3	22.8	26.2	39.8	22	1	1	1	1	1	1	7.54
High	Q86V38	Atrophin 1 OS=Homo sapiens OX=9606 GN=ATN1 PE=1 SV=1	FALSE	TRUE	3.27456	3	3	3	1191	125.5	High	High	High	High	High	High		0.955	1.329	0.488	0.924	0.421356	45.6013	43.3	41.3	35.5	47.2	61.5	30	1	1	1	1	1	1	5.03
High	Q96HA1	Nuclear envelope pore membrane protein POM 121 OS=Homo sapiens OX=9606 GN=POM121 PE=1 SV=2	FALSE	TRUE	2.72218	3	4	3	1249	127.6	High	High	High	High	High	High		1.015	0.992	0.789	0.932	0.124374	13.3449	13.4	13.6	13.5	13.4	16.1	12.7	1	1	1	1	1	1	9.24
High	Q96EA4	Protein Spindly OS=Homo sapiens OX=9606 GN=SPDL1 PE=1 SV=2	FALSE	TRUE	4.95868	3	3	3	605	70.1	High	High	High	High	High	High		0.667	1.559	0.572	0.932667	0.544496	58.3806	38.6	25.8	24.3	37.8	51.9	29.7	2	2	2	2	2	2	7.41
High	Q96KG9	N-terminal kinase-like protein OS=Homo sapiens OX=9606 GN=SCYL1 PE=1 SV=1	FALSE	TRUE	3.9604	3	3	3	808	89.6	High	High	High	High	High	High		0.95	1.091	0.761	0.934	0.165581	17.7281	48.3	45.9	38.8	42.3	56.9	43.3	3	3	3	3	3	3	4.9
High	P42677	40S ribosomal protein S27 OS=Homo sapiens OX=9606 GN=RPS27 PE=1 SV=3	FALSE	TRUE	38.0952	3	5	1	84	9.5	High	High	High	High	High	High		0.955	0.912	0.939	0.935333	0.0217332	2.32358	35.4	33.8	37.4	34.1	42.8	40.2	1	1	1	1	1	1	12.21
High	Q14129	Protein DGCR6 OS=Homo sapiens OX=9606 GN=DGCR6 PE=1 SV=3	FALSE	TRUE	15	3	3	3	220	25	High	High	High	High	High	High		0.908	1.121	0.779	0.936	0.172711	18.452	27.4	24.9	24.6	27.6	29.8	23.2	1	1	1	1	1	1	8.55
High	Q9Y546	Leucine-rich repeat-containing protein 42 OS=Homo sapiens OX=9606 GN=LRRC42 PE=1 SV=1	FALSE	TRUE	5.84112	3	3	3	428	48.5	High	High	High	High	High	High		0.921	1.266	0.625	0.937333	0.320812	34.226	66.9	61.7	53.6	67.8	95.2	59.5	1	1	1	1	1	1	6.24
High	A0A024R1X8	Junction plakoglobin, isoform CRA_a OS=Homo sapiens OX=9606 GN=JUP PE=4 SV=1	FALSE	TRUE	5.36913	3	3	2	745	81.7	High	High	High	High	High	High		0.502	1.363	0.951	0.938667	0.430632	45.877	70.1	35.2	42	57.3	55.2	52.5	2	2	2	2	2	2	8.9
High	O43684	Mitotic checkpoint protein BUB3 OS=Homo sapiens OX=9606 GN=BUB3 PE=1 SV=1	FALSE	TRUE	10.3659	3	3	3	328	37.1	High	High	High	High	High	High		0.9	1.065	0.855	0.94	0.110567	11.7624	96.2	86.6	89.2	95	105.9	90.5	3	3	3	3	3	3	7.18
High	H0Y8C6	Importin-5 (Fragment) OS=Homo sapiens OX=9606 GN=IPO5 PE=1 SV=1	FALSE	TRUE	2.91174	3	3	3	1099	123.8	High	High	High	High	High	High		0.885	1.319	0.617	0.940333	0.354256	37.6735	8.8	7.8	8.6	11.4	14.9	9.2	1	1	1	1	1	1	7.12
High	Q9Y230	RuvB-like 2 OS=Homo sapiens OX=9606 GN=RUVBL2 PE=1 SV=3	FALSE	TRUE	6.69546	3	3	3	463	51.1	High	High	High	High	High	High		0.871	1.358	0.604	0.944333	0.382312	40.4848	28.1	24.4	18.1	24.6	33.3	20.1	1	1	1	1	1	1	4.91
High	Q59F99	Staufen isoform b variant (Fragment) OS=Homo sapiens OX=9606 PE=2 SV=1	FALSE	TRUE	5.24535	3	3	2	591	64.7	High	High	High	High	High	High		0.849	1.372	0.617	0.946	0.386734	40.8809	10	8.5	8.2	11.3	15.4	9.5	1	1	1	1	1	1	7.24
High	A0A140VJE8	AP complex subunit beta OS=Homo sapiens OX=9606 GN=AP2B1 PE=2 SV=1	FALSE	TRUE	3.68034	3	3	3	951	105.6	High	High	High	High	High	High		1.162	0.837	0.84	0.946333	0.186779	19.7371	17.4	20.2	19.6	16.4	19.4	16.3	1	1	1	1	1	1	8.34
High	I1E4Y6	GRB10-interacting GYF protein 2 OS=Homo sapiens OX=9606 GN=GIGYF2 PE=1 SV=1	FALSE	TRUE	2.95231	3	3	3	1321	152.4	High	High	High	High	High	High		0.943	1.293	0.614	0.95	0.339554	35.7425	123.1	116	92.5	119.6	160.6	98.6	2	2	2	2	2	2	7.56
High	E7ESA6	Focal adhesion kinase 1 OS=Homo sapiens OX=9606 GN=PTK2 PE=1 SV=1	FALSE	TRUE	4.0146	3	3	3	1096	124	High	High	High	High	High	High		0.806	1.351	0.701	0.952667	0.348939	36.6276	48.2	38.8	30	40.5	55.5	38.9	2	2	2	2	2	2	8.27
High	P56182	Ribosomal RNA processing protein 1 homolog A OS=Homo sapiens OX=9606 GN=RRP1 PE=1 SV=1	FALSE	TRUE	6.94143	3	4	3	461	52.8	High	High	High	High	High	High		0.867	1.261	0.76	0.962667	0.263845	27.4078	54.6	47.3	44.2	55.8	71.7	54.5	3	3	3	3	3	3	9.78
High	A0A0B4J1V8	HCG2039996 OS=Homo sapiens OX=9606 GN=PPAN-P2RY11 PE=3 SV=1	FALSE	TRUE	4.28212	3	3	3	794	87.9	High	High	High	High	High	High		0.921	1.264	0.703	0.962667	0.282811	29.3779	47.6	43.9	42.1	53.2	62.9	44.2	3	3	3	3	3	3	7.99
High	D3DQ70	SERPINE1 mRNA binding protein 1, isoform CRA_d OS=Homo sapiens OX=9606 GN=SERBP1 PE=4 SV=1	FALSE	TRUE	10.1075	3	4	3	465	50.9	High	High	High	High	High	High		0.964	0.972	0.955	0.963667	0.0085049	0.882556	55.7	53.7	59.3	57.7	70.8	67.6	2	2	2	2	2	2	11.97
High	A8K4W2	cDNA FLJ78635, highly similar to Homo sapiens ATP synthase, H+ transporting, mitochondrial F0 complex, subunit b, isoform 1 (ATP5F1), transcript variant 1, mRNA OS=Homo sapiens OX=9606 PE=2 SV=1	FALSE	TRUE	11.3281	3	3	3	256	28.9	High	High	High	High	High	High		1.08	0.957	0.859	0.965333	0.110735	11.4712	69.6	75.1	66.2	63.3	81.1	69.7	3	3	3	3	3	3	7.56
High	Q96CS3	FAS-associated factor 2 OS=Homo sapiens OX=9606 GN=FAF2 PE=1 SV=2	FALSE	TRUE	6.51685	3	3	3	445	52.6	High	High	High	High	High	High		0.852	1.47	0.577	0.966333	0.457347	47.3281	25.3	21.5	18.4	27.1	33.8	19.5	2	2	2	2	2	2	8.52
High	A1L3Z9	Glutamine-rich 1 OS=Homo sapiens OX=9606 GN=QRICH1 PE=2 SV=1	FALSE	TRUE	3.60825	3	3	3	776	86.4	High	High	High	High	High	High		0.919	1.387	0.593	0.966333	0.399111	41.3016	52.7	48.4	41	56.8	65.3	38.7	1	1	1	1	1	1	6.07
High	P32119	Peroxiredoxin-2 OS=Homo sapiens OX=9606 GN=PRDX2 PE=1 SV=5	FALSE	TRUE	14.1414	3	3	2	198	21.9	High	High	High	High	High	High		0.607	1.027	1.27	0.968	0.335415	34.6503	51.7	31.4	42.7	43.8	42.2	53.6	1	1	1	1	1	1	3.33
High	E2GH26	T-cell factor-4 variant L OS=Homo sapiens OX=9606 GN=TCF7L2 PE=1 SV=1	FALSE	TRUE	5.93081	3	3	3	607	66.6	High	High	High	High	High	High		0.925	1.382	0.599	0.968667	0.393322	40.6045	27.3	25.2	19.8	27.4	39.2	23.5	2	2	2	2	2	2	5.85
High	Q96RN5	Mediator of RNA polymerase II transcription subunit 15 OS=Homo sapiens OX=9606 GN=MED15 PE=1 SV=2	FALSE	TRUE	4.44162	3	4	3	788	86.7	High	High	High	High	High	High		0.826	1.516	0.568	0.97	0.490131	50.5289	15.7	13	12.4	18.8	23.4	13.3	1	1	1	1	1	1	15.64
High	A0A0S2Z5M1	SEC63-like (S. cerevisiae) (Fragment) OS=Homo sapiens OX=9606 GN=SEC63 PE=2 SV=1	FALSE	TRUE	5.52632	3	3	3	760	87.9	High	High	High	High	High	High		0.964	1.26	0.686	0.97	0.287047	29.5925	14.1	13.6	8.8	11.1	14	9.6	1	1	1	1	1	1	11.68
High	Q6IPI1	60S ribosomal protein L29 OS=Homo sapiens OX=9606 GN=RPL29 PE=2 SV=1	FALSE	TRUE	13.0435	3	3	3	161	17.9	High	High	High	High	High	High		1.118	0.986	0.806	0.97	0.156614	16.1458	115.6	129.2	121.4	119.7	170.1	137.1	2	2	2	2	2	2	6.22
High	P30837	Aldehyde dehydrogenase X, mitochondrial OS=Homo sapiens OX=9606 GN=ALDH1B1 PE=1 SV=3	FALSE	TRUE	6.38298	3	4	2	517	57.2	High	High	High	High	High	High		0.988	1.235	0.693	0.972	0.271354	27.9171	38.2	37.7	36	44.4	56	38.8	2	2	2	2	2	2	12.03
High	P20930	Filaggrin OS=Homo sapiens OX=9606 GN=FLG PE=1 SV=3	TRUE	TRUE	0.787983	3	3	3	4061	434.9	Medium	Medium	Medium	Medium	Medium	Medium		0.559	1.351	1.012	0.974	0.397365	40.7972	105.2	58.8	59.8	80.8	75.5	76.4	2	2	2	2	2	2	2.58
High	A0A087WT20	DDB1- and CUL4-associated factor 13 OS=Homo sapiens OX=9606 GN=DCAF13 PE=1 SV=1	FALSE	TRUE	6.36516	3	3	3	597	67.5	High	High	High	High	High	High		1.042	1.305	0.597	0.981333	0.357878	36.4685	29.9	31.2	26.5	34.6	38.5	23	2	2	2	2	2	2	8.94
High	Q9HBH0	Rho-related GTP-binding protein RhoF OS=Homo sapiens OX=9606 GN=RHOF PE=1 SV=1	FALSE	TRUE	13.2701	3	3	3	211	23.6	High	High	High	High	High	High		1.315	1.219	0.444	0.992667	0.477578	48.1106	30.4	40	29.7	36.2	54.9	24.4	3	3	3	3	3	3	7.09
High	Q8WXF1	Paraspeckle component 1 OS=Homo sapiens OX=9606 GN=PSPC1 PE=1 SV=1	FALSE	TRUE	6.11855	3	3	2	523	58.7	High	High	High	High	High	High		1.081	1.126	0.771	0.992667	0.193283	19.4711	14.7	15.9	13.5	15.2	19.2	14.8	1	1	1	1	1	1	6.19
High	E9PRY8	Elongation factor 1-delta OS=Homo sapiens OX=9606 GN=EEF1D PE=1 SV=1	FALSE	TRUE	4.30416	3	3	3	697	76.5	High	High	High	High	High	High		1.112	1.276	0.619	1.00233	0.341954	34.1158	44.1	49	44.1	56.3	63.6	39.4	3	3	3	3	3	3	5.03
High	Q9Y2Z2	Protein MTO1 homolog, mitochondrial OS=Homo sapiens OX=9606 GN=MTO1 PE=1 SV=2	FALSE	TRUE	3.48675	3	3	3	717	79.9	High	High	High	High	High	High		0.934	1.518	0.559	1.00367	0.483281	48.1515	18.8	17.6	12.8	19.4	29	16.2	1	1	1	1	1	1	7.67
High	A0A087WXF8	Nucleolar protein of 40 kDa OS=Homo sapiens OX=9606 GN=ZCCHC17 PE=1 SV=1	FALSE	TRUE	13.308	3	3	3	263	29.6	High	High	High	High	High	High		0.765	1.419	0.829	1.00433	0.360535	35.8979	14.9	11.4	8.1	11.5	16.4	13.6	1	1	1	1	1	1	4.86
High	P14324	Farnesyl pyrophosphate synthase OS=Homo sapiens OX=9606 GN=FDPS PE=1 SV=4	FALSE	TRUE	8.83055	3	3	3	419	48.2	High	High	High	High	High	High		0.902	1.294	0.821	1.00567	0.252967	25.1542	38.1	34.4	29.8	38.5	49.6	40.7	1	1	1	1	1	1	7.57
High	Q96EY7	Pentatricopeptide repeat domain-containing protein 3, mitochondrial OS=Homo sapiens OX=9606 GN=PTCD3 PE=1 SV=3	FALSE	TRUE	4.06386	3	4	2	689	78.5	High	High	High	High	High	High		1.056	1.239	0.747	1.014	0.248674	24.5241	12.3	13	9.5	11.8	17.4	13	1	1	1	1	1	1	8.66
High	B3KY86	cDNA FLJ16043 fis, clone BRCAN2028355, highly similar to Calcium/calmodulin-dependent protein kinasetype II gamma chain OS=Homo sapiens OX=9606 PE=2 SV=1	FALSE	TRUE	5.04348	3	3	2	575	63.8	High	High	High	High	High	High		1.015	1.189	0.847	1.017	0.171009	16.815	45.2	45.8	34.9	41.5	49.7	42.1	1	1	1	1	1	1	6.49
High	A0A2R8YEM2	Cyclin-H OS=Homo sapiens OX=9606 GN=CCNH PE=1 SV=1	FALSE	TRUE	10.4615	3	3	3	325	37.9	High	High	High	High	High	High		0.802	1.638	0.636	1.02533	0.537038	52.3769	23.6	18.9	18.7	30.7	36.5	23.2	2	2	2	2	2	2	8.91
High	Q9NXR8	Inhibitor of growth protein 3 OS=Homo sapiens OX=9606 GN=ING3 PE=1 SV=2	FALSE	TRUE	5.74163	3	3	3	418	46.7	High	High	High	High	High	High		0.877	1.473	0.733	1.02767	0.392333	38.1771	43.3	38	35.9	52.9	55.1	40.4	2	2	2	2	2	2	7.68
High	Q9Y3C6	Peptidyl-prolyl cis-trans isomerase-like 1 OS=Homo sapiens OX=9606 GN=PPIL1 PE=1 SV=1	FALSE	TRUE	25.3012	3	3	3	166	18.2	High	High	High	High	High	High		0.914	1.48	0.7	1.03133	0.40302	39.0776	30.9	28.2	20.2	29.9	36	25.2	1	1	1	1	1	1	6.93
High	B3KSH1	Eukaryotic translation initiation factor 3 subunit F OS=Homo sapiens OX=9606 GN=EIF3F PE=2 SV=1	FALSE	TRUE	7.25806	3	3	3	372	39.1	High	High	High	High	High	High		1.034	1.077	1.012	1.041	0.0330606	3.17585	44.6	46	36	38.8	42.5	43	2	2	2	2	2	2	5.25
High	Q07666	KH domain-containing, RNA-binding, signal transduction-associated protein 1 OS=Homo sapiens OX=9606 GN=KHDRBS1 PE=1 SV=1	FALSE	TRUE	5.19187	3	3	3	443	48.2	High	High	High	High	High	High		1.118	0.845	1.179	1.04733	0.17786	16.9822	42.7	47.8	63.9	54	66.4	78.3	2	2	2	2	2	2	6.33
High	Q9Y692	Glucocorticoid modulatory element-binding protein 1 OS=Homo sapiens OX=9606 GN=GMEB1 PE=1 SV=2	FALSE	TRUE	4.18848	3	4	2	573	62.6	High	High	High	High	High	High		1.3	1.104	0.739	1.04767	0.284711	27.1757	9.3	12.1	11.1	12.3	11.5	8.5	1	1	1	1	1	1	8.11
High	E9PI68	Signal peptidase complex subunit 2 OS=Homo sapiens OX=9606 GN=SPCS2 PE=1 SV=1	FALSE	TRUE	13.6187	3	4	3	257	28.5	Medium	Medium	Medium	Medium	Medium	Medium		1.499	0.928	0.788	1.07167	0.376644	35.1456	14.3	21.4	22.4	20.8	27.8	21.9	2	2	2	2	2	2	15.21
High	Q9NZE8	39S ribosomal protein L35, mitochondrial OS=Homo sapiens OX=9606 GN=MRPL35 PE=1 SV=3	FALSE	TRUE	13.2979	3	3	3	188	21.5	High	High	High	High	High	High		1.008	1.465	0.758	1.077	0.358515	33.2883	58.1	58.6	44.7	65.5	78.6	59.6	2	2	2	2	2	2	7.43
High	Q9BVS4	Serine/threonine-protein kinase RIO2 OS=Homo sapiens OX=9606 GN=RIOK2 PE=1 SV=2	FALSE	TRUE	7.42754	3	3	3	552	63.2	High	High	High	High	High	High		1.212	1.242	0.778	1.07733	0.259664	24.1025	38.6	46.8	26.3	32.6	45.9	35.7	1	1	1	1	1	1	7.48
High	P07305	Histone H1.0 OS=Homo sapiens OX=9606 GN=H1F0 PE=1 SV=3	FALSE	TRUE	16.4948	3	4	3	194	20.9	High	High	High	High	High	High		1.152	1.095	1.005	1.084	0.0741148	6.83716	116.5	134.2	104.7	114.7	151.6	152.4	3	3	3	3	3	3	11.72
High	A0A024R3N2	Nuclear factor related to kappaB binding protein, isoform CRA_a OS=Homo sapiens OX=9606 GN=NFRKB PE=4 SV=1	FALSE	TRUE	1.89643	3	3	3	1371	147.3	High	High	High	High	High	High		0.85	1.744	0.663	1.08567	0.577749	53.2161	116.4	98.9	70.6	123.2	152.3	101	2	2	2	2	2	2	4.62
High	Q68D10	Protein SPT2 homolog OS=Homo sapiens OX=9606 GN=SPTY2D1 PE=1 SV=3	FALSE	TRUE	4.37956	3	3	3	685	75.6	High	High	High	High	High	High		0.957	1.696	0.614	1.089	0.552946	50.7756	53.4	51.2	40.8	69.1	74.7	45.9	2	2	2	2	2	2	8.6
High	Q00535	Cyclin-dependent-like kinase 5 OS=Homo sapiens OX=9606 GN=CDK5 PE=1 SV=3	FALSE	TRUE	7.87671	3	3	1	292	33.3	High	High	High	High	High	High		0.804	1.608	0.876	1.096	0.444864	40.5898	24.9	20	20.3	32.7	29.8	26.1	1	1	1	1	1	1	4.93
High	Q68CZ2	Tensin-3 OS=Homo sapiens OX=9606 GN=TNS3 PE=1 SV=2	FALSE	TRUE	4.56747	3	3	3	1445	155.2	High	High	High	High	High	High		1.082	1.136	1.096	1.10467	0.0280238	2.53686	13.2	14.3	13.8	15.7	16.6	18.2	1	1	1	1	1	1	7.35
High	A8K962	cDNA FLJ77827, highly similar to Human upstream binding factor (hUBF) OS=Homo sapiens OX=9606 PE=2 SV=1	FALSE	TRUE	4.18848	3	3	3	764	89.4	High	High	High	High	High	High		1.385	1.413	0.541	1.113	0.495564	44.5251	10.3	14.3	10.3	14.6	18.5	10	1	1	1	1	1	1	6.68
High	C9JWJ8	Nuclear factor 1 OS=Homo sapiens OX=9606 GN=NFIX PE=1 SV=2	FALSE	TRUE	10.9181	3	3	2	403	44.6	High	High	High	High	High	High		0.991	1.475	0.895	1.12033	0.310878	27.7487	26.7	26.4	17.8	26.3	29.5	26.4	2	2	2	2	2	2	8.65
High	Q96SQ9	Cytochrome P450 2S1 OS=Homo sapiens OX=9606 GN=CYP2S1 PE=1 SV=2	FALSE	TRUE	7.53968	3	3	3	504	55.8	High	High	High	High	High	High		1.012	1.899	0.623	1.178	0.653996	55.5175	26.2	26.5	16.5	31.4	42.2	26.3	1	1	1	1	1	1	10.32
High	P09382	Galectin-1 OS=Homo sapiens OX=9606 GN=LGALS1 PE=1 SV=2	FALSE	TRUE	24.4444	3	3	3	135	14.7	High	High	High	High	High	High		1.552	0.94	1.29	1.26067	0.307053	24.3564	16.3	25.3	24.9	23.4	24.1	31.1	1	1	1	1	1	1	8.68
High	P02754	Beta-lactoglobulin OS=Bos taurus GN=LGB PE=1 SV=3	TRUE	FALSE	15.7303	3	3	3	178	19.9	High	High	High	High	High	High		5.779	1.149	1.039	2.65567	2.70545	101.874	31.6	182.7	38.4	44.1	40.9	42.5	3	3	3	3	3	3	7.47
High	P02666	Beta-casein OS=Bos taurus GN=CSN2 PE=1 SV=2	TRUE	FALSE	14.2857	3	3	3	224	25.1	High	High	Medium	Medium	Medium	High		7.438	1.987	10.333	6.586	4.23773	64.3445	9.9	73.3	12.9	25.7	12.6	130.2	1	1	1	1	1	1	5.08
High	P49840	Glycogen synthase kinase-3 alpha OS=Homo sapiens OX=9606 GN=GSK3A PE=1 SV=2	FALSE	TRUE	10.352	3	3	1	483	50.9	High	High	High	High	High	High					#DIV/0!	#DIV/0!	#DIV/0!													10.62
High	Q52LR7	Enhancer of polycomb homolog 2 OS=Homo sapiens OX=9606 GN=EPC2 PE=1 SV=2	FALSE	TRUE	4.7088	3	3	2	807	91	High	High	High	High	High	High					#DIV/0!	#DIV/0!	#DIV/0!													7.8
High	A8K7H4	Origin recognition complex subunit 4 OS=Homo sapiens OX=9606 PE=2 SV=1	FALSE	TRUE	9.86239	3	3	1	436	50.4	High	Not Found	High	High	High	High					#DIV/0!	#DIV/0!	#DIV/0!													7.89
High	H7BZJ3	Protein disulfide-isomerase A3 (Fragment) OS=Homo sapiens OX=9606 GN=PDIA3 PE=1 SV=1	FALSE	TRUE	29.2683	3	3	1	123	13.5	High	High	High	High	High	High					#DIV/0!	#DIV/0!	#DIV/0!													9.19
High	A0A024R8M0	Guanine nucleotide binding protein (G protein), alpha 13, isoform CRA_a OS=Homo sapiens OX=9606 GN=GNA13 PE=4 SV=1	FALSE	TRUE	8.75332	3	5	2	377	44	High	High	High	High	High	High					#DIV/0!	#DIV/0!	#DIV/0!													10.61
High	P41227	N-alpha-acetyltransferase 10 OS=Homo sapiens OX=9606 GN=NAA10 PE=1 SV=1	FALSE	TRUE	13.617	3	3	3	235	26.4	High	High	High	High	High	High					#DIV/0!	#DIV/0!	#DIV/0!													8.17
High	A8K228	cDNA FLJ77874, highly similar to Homo sapiens glycine C-acetyltransferase (2-amino-3-ketobutyrate coenzyme A ligase), mRNA OS=Homo sapiens OX=9606 PE=2 SV=1	FALSE	TRUE	11.4558	3	3	1	419	45.2	High	High	High	High	High	High					#DIV/0!	#DIV/0!	#DIV/0!													8.43
High	Q9UPQ9	Trinucleotide repeat-containing gene 6B protein OS=Homo sapiens OX=9606 GN=TNRC6B PE=1 SV=4	FALSE	TRUE	2.40044	3	3	3	1833	193.9	High	High	High	High	High	High	Biotin [K690]				#DIV/0!	#DIV/0!	#DIV/0!													6.69
High	Q9Y520	Protein PRRC2C OS=Homo sapiens OX=9606 GN=PRRC2C PE=1 SV=4	FALSE	TRUE	1.03591	3	3	3	2896	316.7	High	High	High	High	High	High					#DIV/0!	#DIV/0!	#DIV/0!													6.73
High	O75663	TIP41-like protein OS=Homo sapiens OX=9606 GN=TIPRL PE=1 SV=2	FALSE	TRUE	14.3382	3	3	3	272	31.4	High	High	High	High	High	High					#DIV/0!	#DIV/0!	#DIV/0!													7.66
High	P40763	Signal transducer and activator of transcription 3 OS=Homo sapiens OX=9606 GN=STAT3 PE=1 SV=2	FALSE	TRUE	5.71429	3	3	3	770	88	High	High	High	High	High	High					#DIV/0!	#DIV/0!	#DIV/0!													5.63
High	Q92618	Zinc finger protein 516 OS=Homo sapiens OX=9606 GN=ZNF516 PE=1 SV=1	FALSE	TRUE	3.09544	3	4	3	1163	124.2	High	High	High	High	High	High					#DIV/0!	#DIV/0!	#DIV/0!													9.1
High	Q05655	Protein kinase C delta type OS=Homo sapiens OX=9606 GN=PRKCD PE=1 SV=2	FALSE	TRUE	6.36095	3	3	3	676	77.5	High	High	High	High	High	High					#DIV/0!	#DIV/0!	#DIV/0!													9.63
High	O75600	2-amino-3-ketobutyrate coenzyme A ligase, mitochondrial OS=Homo sapiens OX=9606 GN=GCAT PE=1 SV=1	FALSE	TRUE	10.7399	3	3	1	419	45.3	High	High	High	High	High	High					#DIV/0!	#DIV/0!	#DIV/0!													8.6
High	P51812	Ribosomal protein S6 kinase alpha-3 OS=Homo sapiens OX=9606 GN=RPS6KA3 PE=1 SV=1	FALSE	TRUE	3.91892	3	4	1	740	83.7	High	High	High	High	High	High					#DIV/0!	#DIV/0!	#DIV/0!													11.1
High	Q8NF37	Lysophosphatidylcholine acyltransferase 1 OS=Homo sapiens OX=9606 GN=LPCAT1 PE=1 SV=2	FALSE	TRUE	5.80524	3	3	2	534	59.1	High	High	High	High	High	High					#DIV/0!	#DIV/0!	#DIV/0!													5.57
High	V9HW90	Glutathione reductase OS=Homo sapiens OX=9606 GN=HEL-75 PE=2 SV=1	FALSE	TRUE	6.13027	3	3	3	522	56.2	High	High	High	High	High	High					#DIV/0!	#DIV/0!	#DIV/0!													4.84
High	I3L2J0	Protein capicua homolog OS=Homo sapiens OX=9606 GN=CIC PE=1 SV=1	FALSE	TRUE	1.23309	3	4	3	2514	257.6	High	High	High	High	High	High					#DIV/0!	#DIV/0!	#DIV/0!													8.29
High	Q9Y4R8	Telomere length regulation protein TEL2 homolog OS=Homo sapiens OX=9606 GN=TELO2 PE=1 SV=2	FALSE	TRUE	3.82318	3	3	3	837	91.7	High	High	High	High	High	High					#DIV/0!	#DIV/0!	#DIV/0!													6.73
High	A0A024R7G7	Solute carrier family 35, member E1, isoform CRA_c OS=Homo sapiens OX=9606 GN=SLC35E1 PE=4 SV=1	FALSE	TRUE	8.04878	3	3	3	410	44.7	High	High	High	High	High	High					#DIV/0!	#DIV/0!	#DIV/0!													7.59
High	P61160	Actin-related protein 2 OS=Homo sapiens OX=9606 GN=ACTR2 PE=1 SV=1	FALSE	TRUE	7.86802	3	3	2	394	44.7	High	High	High	High	High	High					#DIV/0!	#DIV/0!	#DIV/0!													6.18
High	Q8WWM7	Ataxin-2-like protein OS=Homo sapiens OX=9606 GN=ATXN2L PE=1 SV=2	FALSE	TRUE	3.34884	3	3	2	1075	113.3	High	High	High	High	High	Medium					#DIV/0!	#DIV/0!	#DIV/0!													8.31
High	A8K3H8	cDNA FLJ77680, highly similar to Homo sapiens protein phosphatase 2 (formerly 2A), regulatory subunit A (PR 65), alpha isoform (PPP2R1A), mRNA OS=Homo sapiens OX=9606 PE=2 SV=1	FALSE	TRUE	6.79117	3	3	3	589	65.3	High	High	High	High	High	High					#DIV/0!	#DIV/0!	#DIV/0!													6
High	Q86UU1	Pleckstrin homology-like domain family B member 1 OS=Homo sapiens OX=9606 GN=PHLDB1 PE=1 SV=1	FALSE	TRUE	1.88816	3	5	2	1377	151.1	High	High	High	High	High	High					#DIV/0!	#DIV/0!	#DIV/0!													11.84
High	G5E9G6	E3 ubiquitin-protein ligase TRIP12 OS=Homo sapiens OX=9606 GN=TRIP12 PE=1 SV=1	FALSE	TRUE	7.44186	3	3	1	430	45.3	High	High	High	Not Found	High	Not Found					#DIV/0!	#DIV/0!	#DIV/0!													6.65
High	Q7L8L6	FAST kinase domain-containing protein 5, mitochondrial OS=Homo sapiens OX=9606 GN=FASTKD5 PE=1 SV=1	FALSE	TRUE	6.02094	3	3	3	764	86.5	High	High	High	High	High	High					#DIV/0!	#DIV/0!	#DIV/0!													2.03
High	Q9HAU4	E3 ubiquitin-protein ligase SMURF2 OS=Homo sapiens OX=9606 GN=SMURF2 PE=1 SV=1	FALSE	TRUE	4.41176	3	3	3	748	86.1	High	High	High	High	High	High					#DIV/0!	#DIV/0!	#DIV/0!													5.29
High	H3BND4	Pyridoxal-dependent decarboxylase domain-containing protein 1 OS=Homo sapiens OX=9606 GN=PDXDC1 PE=1 SV=1	FALSE	TRUE	4.59057	3	3	3	806	88.7	High	High	High	High	High	High					#DIV/0!	#DIV/0!	#DIV/0!													7.28
High	Q02413	Desmoglein-1 OS=Homo sapiens OX=9606 GN=DSG1 PE=1 SV=2	FALSE	TRUE	4.2898	3	3	3	1049	113.7	High	High	High	High	High	High					#DIV/0!	#DIV/0!	#DIV/0!													7.41
High	Q86SQ0	Pleckstrin homology-like domain family B member 2 OS=Homo sapiens OX=9606 GN=PHLDB2 PE=1 SV=2	FALSE	TRUE	2.07502	3	3	3	1253	142.1	High	High	High	High	High	High					#DIV/0!	#DIV/0!	#DIV/0!													6.79
High	Q7Z3K3	Pogo transposable element with ZNF domain OS=Homo sapiens OX=9606 GN=POGZ PE=1 SV=2	FALSE	TRUE	2.05674	3	3	3	1410	155.2	High	High	High	High	High	High					#DIV/0!	#DIV/0!	#DIV/0!													2.63
High	P22314	Ubiquitin-like modifier-activating enzyme 1 OS=Homo sapiens OX=9606 GN=UBA1 PE=1 SV=3	FALSE	TRUE	4.15879	3	3	3	1058	117.8	High	High	High	High	High	High					#DIV/0!	#DIV/0!	#DIV/0!													7.69
High	P08243	Asparagine synthetase [glutamine-hydrolyzing] OS=Homo sapiens OX=9606 GN=ASNS PE=1 SV=4	FALSE	TRUE	4.81283	3	3	3	561	64.3	High	High	High	High	High	High					#DIV/0!	#DIV/0!	#DIV/0!													6.8
High	Q92769	Histone deacetylase 2 OS=Homo sapiens OX=9606 GN=HDAC2 PE=1 SV=2	FALSE	TRUE	7.9918	3	3	2	488	55.3	High	High	High	High	High	High					#DIV/0!	#DIV/0!	#DIV/0!													9.19
High	P49454	Centromere protein F OS=Homo sapiens OX=9606 GN=CENPF PE=1 SV=2	FALSE	TRUE	0.685358	3	3	2	3210	367.5	High	High	High	High	High	High					#DIV/0!	#DIV/0!	#DIV/0!													4.23
High	Q9BXW9	Fanconi anemia group D2 protein OS=Homo sapiens OX=9606 GN=FANCD2 PE=1 SV=2	FALSE	TRUE	1.72295	3	3	2	1451	164	High	High	High	High	High	High					#DIV/0!	#DIV/0!	#DIV/0!													7.4
High	A0A1S5UZ07	Talin-1 OS=Homo sapiens OX=9606 GN=TLN1 PE=2 SV=1	FALSE	TRUE	1.36826	3	3	2	2558	271.3	High	High	High	High	High	High					#DIV/0!	#DIV/0!	#DIV/0!													4.35
High	F5H5X6	Probable 28S rRNA (cytosine(4447)-C(5))-methyltransferase (Fragment) OS=Homo sapiens OX=9606 GN=NOP2 PE=1 SV=1	FALSE	TRUE	10	3	3	1	250	27.4	Medium	Medium	Medium	Medium	Medium	Medium					#DIV/0!	#DIV/0!	#DIV/0!													6.02
High	Q03001	Dystonin OS=Homo sapiens OX=9606 GN=DST PE=1 SV=4	FALSE	TRUE	0.554822	3	3	2	7570	860.1	High	Medium	High	High	High	High					#DIV/0!	#DIV/0!	#DIV/0!													2.71
High	Q53HS1	Achalasia, adrenocortical insufficiency, alacrimia (Allgrove, triple-A) variant (Fragment) OS=Homo sapiens OX=9606 PE=2 SV=1	FALSE	TRUE	4.3956	3	3	3	546	59.5	Medium	Medium	Medium	Medium	Medium	Medium					#DIV/0!	#DIV/0!	#DIV/0!													1.66
High	P49916	DNA ligase 3 OS=Homo sapiens OX=9606 GN=LIG3 PE=1 SV=2	FALSE	TRUE	1.98216	2	2	2	1009	112.8	High	High	High	High	High	High		0.867	0.822	0.431	0.706667	0.239792	33.9329	14.9	12.9	10.7	8.8	18.8	8.1	1	1	1	1	1	1	4.94
High	Q8IYV2	DEAD (Asp-Glu-Ala-Asp) box polypeptide 20 OS=Homo sapiens OX=9606 GN=DDX20 PE=2 SV=1	FALSE	TRUE	3.2767	2	2	2	824	92.1	High	High	High	High	High	High		0.822	0.779	0.52	0.707	0.163368	23.1072	25.1	20.6	19.6	15.3	29.8	15.5	1	1	1	1	1	1	7.97
High	Q8IX18	Probable ATP-dependent RNA helicase DHX40 OS=Homo sapiens OX=9606 GN=DHX40 PE=1 SV=2	FALSE	TRUE	2.82413	2	2	2	779	88.5	High	High	High	High	High	High		0.743	0.961	0.468	0.724	0.247049	34.1227	60.3	44.8	43.3	41.6	73.7	34.5	1	1	1	1	1	1	2.56
Medium	P15923	Transcription factor E2-alpha OS=Homo sapiens OX=9606 GN=TCF3 PE=1 SV=1	FALSE	TRUE	2.75229	2	2	1	654	67.6	Medium	Medium	Medium	Medium	Medium	Medium		0.835	0.616	0.722	0.724333	0.109519	15.1199	12.5	10.5	11.5	7.1	14.4	10.4	1	1	1	1	1	1	4.59
High	A0A0A6YYJ8	Putative RNA-binding protein Luc7-like 2 OS=Homo sapiens OX=9606 GN=LUC7L2 PE=4 SV=1	FALSE	TRUE	3.71179	2	2	2	458	54.2	High	High	High	High	High	High		0.677	0.702	0.796	0.725	0.0627455	8.65455	48.8	33	35.5	24.9	60.7	48.3	2	2	2	2	2	2	5.95
High	Q32P41	tRNA (guanine(37)-N1)-methyltransferase OS=Homo sapiens OX=9606 GN=TRMT5 PE=1 SV=2	FALSE	TRUE	2.94695	2	2	2	509	58.2	High	High	High	High	High	High		0.725	0.885	0.568	0.726	0.158502	21.8323	93.9	68.1	75.7	67	112.2	63.7	2	2	2	2	2	2	2.51
High	P55085	Proteinase-activated receptor 2 OS=Homo sapiens OX=9606 GN=F2RL1 PE=1 SV=1	FALSE	TRUE	5.54156	2	2	2	397	44.1	High	High	High	High	High	High		0.71	0.959	0.51	0.726333	0.224945	30.97	25.2	17.9	18.1	17.4	33.5	17.1	1	1	1	1	1	1	6.61
High	A0A0S2Z5H3	Clathrin interactor 1 isoform 2 (Fragment) OS=Homo sapiens OX=9606 GN=CLINT1 PE=2 SV=1	FALSE	TRUE	4.66563	2	2	2	643	70.3	High	High	High	High	High	High		0.539	0.985	0.657	0.727	0.231093	31.7872	24.1	13	16	15.8	28.3	18.6	1	1	1	1	1	1	6.55
High	Q15928	Zinc finger protein 141 OS=Homo sapiens OX=9606 GN=ZNF141 PE=1 SV=1	FALSE	TRUE	8.22785	2	2	2	474	55.2	High	High	High	High	High	High		0.802	0.837	0.55	0.729667	0.156577	21.4587	36.2	29	32.3	27	50.5	27.8	1	1	1	1	1	1	1.73
High	H7C0S8	Uncharacterized protein (Fragment) OS=Homo sapiens OX=9606 PE=4 SV=2	FALSE	TRUE	7.81759	2	2	2	307	34.5	High	High	High	High	High	High		0.597	1.129	0.468	0.731333	0.350377	47.9094	41	24.5	27.7	31.3	50	23.4	2	2	2	2	2	2	5.27
High	Q8NEL9	Phospholipase DDHD1 OS=Homo sapiens OX=9606 GN=DDHD1 PE=1 SV=2	FALSE	TRUE	2	2	5	2	900	100.4	High	High	High	High	High	High		0.746	0.902	0.551	0.733	0.175861	23.9919	212.6	158.7	187	168.7	291.9	160.9	1	1	1	1	1	1	10.28
High	U3KQB3	Casein kinase I isoform gamma-1 OS=Homo sapiens OX=9606 GN=CSNK1G1 PE=1 SV=1	FALSE	TRUE	3.78947	2	2	2	475	54.4	High	High	High	High	High	High		0.637	0.877	0.687	0.733667	0.126623	17.2589	12.9	8.2	10.7	9.4	14.4	9.9	1	1	1	1	1	1	4.33
High	Q53FN7	BZW1 protein variant (Fragment) OS=Homo sapiens OX=9606 PE=2 SV=1	FALSE	TRUE	4.00943	2	2	2	424	48.6	High	High	High	High	High	High		0.786	0.878	0.549	0.737667	0.169742	23.0107	17.2	13.5	10.6	9.3	18.2	10	1	1	1	1	1	1	4.89
High	Q86U06	Probable RNA-binding protein 23 OS=Homo sapiens OX=9606 GN=RBM23 PE=1 SV=1	FALSE	TRUE	5.23918	2	2	2	439	48.7	High	High	High	High	High	High		0.699	0.993	0.53	0.740667	0.234295	31.633	41.2	28.8	32.8	32.6	52.5	27.8	2	2	2	2	2	2	6.63
High	A0A087WYF7	MICOS complex subunit OS=Homo sapiens OX=9606 GN=APOOL PE=1 SV=1	FALSE	TRUE	9.70149	2	3	2	268	29.2	High	High	High	High	High	High		0.797	0.908	0.528	0.744333	0.195398	26.2514	34.9	27.8	27	24.5	40.9	21.6	1	1	1	1	1	1	6.05
Medium	Q8IYU8	Calcium uptake protein 2, mitochondrial OS=Homo sapiens OX=9606 GN=MICU2 PE=1 SV=2	FALSE	TRUE	4.60829	2	2	2	434	49.6	Medium	Medium	Medium	Medium	Medium	Medium		0.82	0.855	0.56	0.745	0.161168	21.6332	11.6	9.5	10.5	9	15	8.4	1	1	1	1	1	1	1.77
High	Q9NZC9	SWI/SNF-related matrix-associated actin-dependent regulator of chromatin subfamily A-like protein 1 OS=Homo sapiens OX=9606 GN=SMARCAL1 PE=1 SV=1	FALSE	TRUE	2.72537	2	3	2	954	105.9	High	High	High	High	High	High		0.618	1.06	0.567	0.748333	0.271113	36.2289	32	19.8	18.4	19.5	36.7	20.8	1	1	1	1	1	1	8.85
Medium	A0A024R0S6	EH-domain containing 2, isoform CRA_a OS=Homo sapiens OX=9606 GN=EHD2 PE=3 SV=1	FALSE	TRUE	2.94659	2	2	1	543	61.1	High	High	High	High	High	High		0.971	0.72	0.555	0.748667	0.209476	27.9799	16.1	15.6	14.3	10.3	22.9	12.7	1	1	1	1	1	1	1.91
High	Q9H8H2	Probable ATP-dependent RNA helicase DDX31 OS=Homo sapiens OX=9606 GN=DDX31 PE=1 SV=2	FALSE	TRUE	2.35018	2	2	2	851	94	High	High	High	High	High	High		0.805	0.875	0.569	0.749667	0.160329	21.3867	57.2	46	50.8	44.5	67.1	38.2	2	2	2	2	2	2	3.29
High	Q9UNL2	Translocon-associated protein subunit gamma OS=Homo sapiens OX=9606 GN=SSR3 PE=1 SV=1	FALSE	TRUE	10.8108	2	3	2	185	21.1	High	High	High	High	High	High		0.799	1.026	0.433	0.752667	0.299203	39.7524	31.8	25.4	27.5	28.2	43.6	18.9	1	1	1	1	1	1	9.13
High	Q9BT22	Chitobiosyldiphosphodolichol beta-mannosyltransferase OS=Homo sapiens OX=9606 GN=ALG1 PE=1 SV=2	FALSE	TRUE	5.38793	2	2	2	464	52.5	High	High	High	High	High	High		0.961	0.766	0.531	0.752667	0.21531	28.6063	19.8	19	23.4	17.9	30.3	16.1	1	1	1	1	1	1	2.73
High	Q1RMC5	Claspin homolog (Xenopus laevis) OS=Homo sapiens OX=9606 GN=CLSPN PE=2 SV=1	FALSE	TRUE	1.34429	2	2	2	1339	150.9	High	High	High	High	High	High		0.679	1.143	0.442	0.754667	0.356573	47.2491	48.7	33	39.2	44.8	77.9	34.4	2	2	2	2	2	2	2.67
High	M0R2B7	DNA polymerase OS=Homo sapiens OX=9606 GN=POLD1 PE=1 SV=1	FALSE	TRUE	2.03001	2	2	2	1133	126.3	High	Medium	Medium	High	High	High		0.674	0.888	0.708	0.756667	0.115001	15.1984	14.1	9.5	14.3	12.7	17.1	12.1	1	1	1	1	1	1	2.55
High	A0A024RDQ8	Replication factor C (Activator 1) 3, 38kDa, isoform CRA_a OS=Homo sapiens OX=9606 GN=RFC3 PE=4 SV=1	FALSE	TRUE	6.46067	2	2	2	356	40.5	High	High	High	High	High	High		0.902	0.86	0.511	0.757667	0.214649	28.3303	19.3	17.4	19.1	16.4	28.2	14.4	1	1	1	1	1	1	6.07
High	A0A0D9SGE8	PHD finger protein 6 OS=Homo sapiens OX=9606 GN=PHF6 PE=1 SV=1	FALSE	TRUE	6.28415	2	2	2	366	41.3	High	High	High	High	High	High		0.87	0.668	0.735	0.757667	0.10289	13.5798	31.1	27.1	29.5	19.7	38.9	28.6	1	1	1	1	1	1	2.02
High	Q01196	Runt-related transcription factor 1 OS=Homo sapiens OX=9606 GN=RUNX1 PE=1 SV=3	FALSE	TRUE	6.84327	2	2	2	453	48.7	High	High	High	High	High	High		0.787	0.861	0.63	0.759333	0.117959	15.5346	14	11	14.4	12.4	23.5	14.8	1	1	1	1	1	1	5.72
Medium	O75306	NADH dehydrogenase [ubiquinone] iron-sulfur protein 2, mitochondrial OS=Homo sapiens OX=9606 GN=NDUFS2 PE=1 SV=2	FALSE	TRUE	4.31965	2	2	2	463	52.5	Medium	Medium	Medium	Medium	Medium	Medium		0.909	0.891	0.478	0.759333	0.243808	32.1082	15.3	13.9	12.9	11.5	18.4	8.8	1	1	1	1	1	1	1.77
High	Q8WV24	Pleckstrin homology-like domain family A member 1 OS=Homo sapiens OX=9606 GN=PHLDA1 PE=1 SV=4	FALSE	TRUE	3.99002	2	2	2	401	45	High	High	High	High	High	High		0.783	0.916	0.585	0.761333	0.16656	21.8774	57	44.6	51.8	47.5	66.1	38.7	2	2	2	2	2	2	4.65
High	B4E2Q0	Calcium-transporting ATPase OS=Homo sapiens OX=9606 GN=ATP2C1 PE=1 SV=1	FALSE	TRUE	1.9937	2	2	2	953	104.6	High	High	High	High	High	High		0.861	0.983	0.445	0.763	0.282071	36.9687	14.3	12.3	11.9	11.7	21.8	9.7	1	1	1	1	1	1	4.68
Medium	A5PLM5	Exosome component 9 OS=Homo sapiens OX=9606 GN=EXOSC9 PE=2 SV=1	FALSE	TRUE	3.18907	2	2	2	439	48.9	Medium	Medium	Medium	Medium	Medium	Medium		0.913	0.845	0.538	0.765333	0.199791	26.1051	23.7	21.7	24.1	20.4	32.9	17.7	1	1	1	1	1	1	4.42
High	Q9P2K3	REST corepressor 3 OS=Homo sapiens OX=9606 GN=RCOR3 PE=1 SV=2	FALSE	TRUE	6.26263	2	2	2	495	55.5	High	High	High	High	High	High		0.891	0.865	0.543	0.766333	0.193849	25.2956	32.8	29.2	37	32	48.6	26.4	2	2	2	2	2	2	3.56
Medium	Q14165	Malectin OS=Homo sapiens OX=9606 GN=MLEC PE=1 SV=1	FALSE	TRUE	4.79452	2	2	2	292	32.2	Medium	Medium	Medium	Medium	Medium	Medium		0.826	0.82	0.654	0.766667	0.0976183	12.7328	53.8	44.5	56.5	46.3	83.9	54.9	2	2	2	2	2	2	1.71
Medium	Q53GF9	Full-length cDNA 5-PRIME end of clone CS0DF013YM24 of Fetal brain of Homo sapiens (Human) variant (Fragment) OS=Homo sapiens OX=9606 PE=2 SV=1	FALSE	TRUE	7.11111	2	2	2	225	25.6	High	High	High	High	High	High		0.885	1.019	0.4	0.768	0.325664	42.4042	110.7	98	94.8	96.6	153	61.2	2	2	2	2	2	2	4.69
High	P61626	Lysozyme C OS=Homo sapiens GN=LYZ PE=1 SV=1	TRUE	TRUE	14.1892	2	2	2	148	16.5	High	High	High	High	High	High		0.736	0.458	1.111	0.768333	0.327699	42.6506	16.3	12	25.1	11.5	10.8	12	1	1	1	1	1	1	3.22
Medium	P61106	Ras-related protein Rab-14 OS=Homo sapiens OX=9606 GN=RAB14 PE=1 SV=4	FALSE	TRUE	9.30233	2	2	1	215	23.9	Medium	Medium	Medium	Medium	Medium	Medium		0.736	0.687	0.903	0.775333	0.113245	14.6059	12	8.8	15.4	10.6	16.5	14.9	1	1	1	1	1	1	4.68
High	P37108	Signal recognition particle 14 kDa protein OS=Homo sapiens OX=9606 GN=SRP14 PE=1 SV=2	FALSE	TRUE	14.7059	2	2	2	136	14.6	High	High	High	High	High	High		0.887	0.768	0.682	0.779	0.102942	13.2146	44.6	39.6	48.4	37.2	64.4	43.9	2	2	2	2	2	2	4.7
High	Q9Y5S5	DNA polymerase epsilon catalytic subunit OS=Homo sapiens OX=9606 GN=POLE1 PE=3 SV=1	FALSE	TRUE	0.740096	2	3	2	2297	262.8	High	High	High	High	High	High		0.89	0.808	0.648	0.782	0.123077	15.7388	15.3	13.6	15.1	12.2	19.6	12.7	1	1	1	1	1	1	7.82
High	P31751	RAC-beta serine/threonine-protein kinase OS=Homo sapiens OX=9606 GN=AKT2 PE=1 SV=2	FALSE	TRUE	3.3264	2	2	1	481	55.7	High	High	High	High	High	High		0.801	1.009	0.543	0.784333	0.233447	29.7637	12	9.6	8.4	8.5	16.2	8.8	1	1	1	1	1	1	4.57
High	A8K8W4	cDNA FLJ77609, highly similar to Homo sapiens DnaJ (Hsp40) homolog, subfamily C, member 16 (DNAJC16), mRNA OS=Homo sapiens OX=9606 PE=2 SV=1	FALSE	TRUE	2.30179	2	2	2	782	90.6	High	High	High	High	High	High		0.833	0.96	0.569	0.787333	0.19946	25.3336	46.7	38.9	37.1	35.6	55.2	31.4	1	1	1	1	1	1	4.67
High	A0A0G2JJD3	HLA-B associated transcript 5, isoform CRA_b OS=Homo sapiens OX=9606 GN=ABHD16A PE=1 SV=1	FALSE	TRUE	2.16306	2	2	2	601	67.5	High	High	High	High	High	High		0.835	1.014	0.515	0.788	0.252798	32.081	13.3	11.1	13.5	13.7	20.6	10.6	1	1	1	1	1	1	2.23
Medium	Q9BY89	Uncharacterized protein KIAA1671 OS=Homo sapiens OX=9606 GN=KIAA1671 PE=1 SV=2	FALSE	TRUE	1.16279	2	2	2	1806	196.6	Medium	Medium	Medium	Medium	Medium	Medium		0.708	0.888	0.768	0.788	0.0916515	11.6309	22.9	16.2	21.1	18.7	28.9	22.2	1	1	1	1	1	1	2.65
High	Q16531	DNA damage-binding protein 1 OS=Homo sapiens OX=9606 GN=DDB1 PE=1 SV=1	FALSE	TRUE	1.57895	2	2	2	1140	126.9	High	High	High	High	High	High		0.656	1.258	0.45	0.788	0.419862	53.282	12.8	8.4	10	12.6	14.9	6.7	1	1	1	1	1	1	2.34
High	Q9P0U3	Sentrin-specific protease 1 OS=Homo sapiens OX=9606 GN=SENP1 PE=1 SV=2	FALSE	TRUE	2.17391	2	3	1	644	73.4	High	High	High	High	High	High		0.906	0.896	0.563	0.788333	0.195208	24.7622	10.6	9.6	12.8	11.5	17.4	9.8	1	1	1	1	1	1	6.65
High	Q9P0H9	Protein RER1 OS=Homo sapiens OX=9606 GN=RER1 PE=1 SV=1	FALSE	TRUE	13.5514	2	2	2	214	24.8	High	High	High	High	High	High		0.862	0.873	0.631	0.788667	0.136654	17.3272	50.5	43.5	48.6	42.4	65.8	41.5	1	1	1	1	1	1	5.62
High	O43324	Eukaryotic translation elongation factor 1 epsilon-1 OS=Homo sapiens OX=9606 GN=EEF1E1 PE=1 SV=1	FALSE	TRUE	12.069	2	3	2	174	19.8	High	High	High	High	High	High		0.87	0.931	0.565	0.788667	0.196088	24.8632	64.1	55.8	53.4	49.7	74.4	42	2	2	2	2	2	2	5.09
High	Q5T200	Zinc finger CCCH domain-containing protein 13 OS=Homo sapiens OX=9606 GN=ZC3H13 PE=1 SV=1	FALSE	TRUE	1.25899	2	2	2	1668	196.5	High	High	High	High	High	High		0.739	1.17	0.458	0.789	0.358624	45.4529	55.8	41.3	43.9	51.4	78.3	35.9	1	1	1	1	1	1	5.06
High	P51858	Hepatoma-derived growth factor OS=Homo sapiens OX=9606 GN=HDGF PE=1 SV=1	FALSE	TRUE	8.33333	2	3	2	240	26.8	High	High	High	High	High	High		0.82	0.903	0.646	0.789667	0.131158	16.6092	10.5	8.6	9.6	8.7	14.4	9.3	1	1	1	1	1	1	9.18
High	P20700	Lamin-B1 OS=Homo sapiens OX=9606 GN=LMNB1 PE=1 SV=2	FALSE	TRUE	3.07167	2	2	2	586	66.4	High	High	High	High	High	High		0.754	0.782	0.835	0.790333	0.041138	5.20514	18.2	13.7	20.1	15.7	18.2	15.2	1	1	1	1	1	1	4.33
High	A0A0A0MTH3	Integrin-linked protein kinase OS=Homo sapiens OX=9606 GN=ILK PE=1 SV=1	FALSE	TRUE	4.7619	2	2	2	483	54.6	High	High	High	High	High	High		0.842	0.934	0.596	0.790667	0.174749	22.1015	12.6	10.6	10.8	10.1	14.1	8.4	1	1	1	1	1	1	5.4
High	Q01804	OTU domain-containing protein 4 OS=Homo sapiens OX=9606 GN=OTUD4 PE=1 SV=4	FALSE	TRUE	2.1544	2	2	2	1114	124	High	High	High	High	High	High		0.852	1.017	0.503	0.790667	0.262432	33.1912	45.4	38.7	41.6	42.3	63	31.7	1	1	1	1	1	1	2.1
High	B3KMV8	cDNA FLJ12766 fis, clone NT2RP2001520, highly similar to Calcium-binding mitochondrial carrier protein Aralar1 OS=Homo sapiens OX=9606 PE=2 SV=1	FALSE	TRUE	2.94985	2	2	2	678	74.7	High	High	High	High	High	High		0.822	0.966	0.591	0.793	0.189175	23.8556	14	11.5	9	8.7	16.4	9.7	1	1	1	1	1	1	4.89
High	H7C0C1	Uncharacterized protein (Fragment) OS=Homo sapiens OX=9606 PE=4 SV=2	FALSE	TRUE	9.09091	2	3	2	242	26.8	High	High	High	High	High	High		0.871	0.73	0.779	0.793333	0.0715844	9.02325	32.2	28	38.8	28.3	48.9	38.1	2	2	2	2	2	2	7.96
High	Q86T24	Transcriptional regulator Kaiso OS=Homo sapiens OX=9606 GN=ZBTB33 PE=1 SV=2	FALSE	TRUE	3.27381	2	2	2	672	74.4	High	High	High	High	High	High		0.686	1.138	0.557	0.793667	0.305097	38.4415	68.3	46.9	45.4	51.6	89.2	49.7	2	2	2	2	2	2	4.94
High	Q9C0G0	Zinc finger protein 407 OS=Homo sapiens OX=9606 GN=ZNF407 PE=1 SV=2	FALSE	TRUE	0.978648	2	2	2	2248	247.2	High	Medium	Medium	High	High	High		0.77	1.03	0.581	0.793667	0.225434	28.4041	44	33.9	36.7	37.8	65.6	38.1	1	1	1	1	1	1	4.22
High	Q86WJ1	Chromodomain-helicase-DNA-binding protein 1-like OS=Homo sapiens OX=9606 GN=CHD1L PE=1 SV=3	FALSE	TRUE	2.11817	2	2	2	897	100.9	High	High	High	High	High	High		0.588	1.311	0.485	0.794667	0.450114	56.6418	13.6	8	9.6	12.6	16.9	8.2	1	1	1	1	1	1	5.29
High	Q96RT1	Erbin OS=Homo sapiens OX=9606 GN=ERBIN PE=1 SV=2	FALSE	TRUE	1.20397	2	2	2	1412	158.2	Medium	Medium	High	High	High	High		0.571	1.055	0.76	0.795333	0.243927	30.6698	18.9	10.8	13.2	13.9	20	15.2	1	1	1	1	1	1	5.78
High	Q9Y3Z3	Deoxynucleoside triphosphate triphosphohydrolase SAMHD1 OS=Homo sapiens OX=9606 GN=SAMHD1 PE=1 SV=2	FALSE	TRUE	3.51438	2	2	2	626	72.2	High	High	High	High	High	High		0.86	0.903	0.628	0.797	0.147929	18.5607	33.6	28.9	40	36.1	44.9	28.2	2	2	2	2	2	2	0
High	C9IZQ1	Translocon-associated protein subunit alpha OS=Homo sapiens OX=9606 GN=SSR1 PE=1 SV=1	FALSE	TRUE	6.37584	2	2	2	298	33.9	High	High	High	High	High	High		0.915	0.842	0.635	0.797333	0.145246	18.2164	29.1	26.6	33.6	28.3	41.7	26.5	2	2	2	2	2	2	1.63
High	Q16186	Proteasomal ubiquitin receptor ADRM1 OS=Homo sapiens OX=9606 GN=ADRM1 PE=1 SV=2	FALSE	TRUE	5.89681	2	2	2	407	42.1	High	High	High	High	High	High		0.842	1.07	0.483	0.798333	0.295926	37.068	27.2	22.9	19.5	20.9	35.2	17	1	1	1	1	1	1	3.83
High	Q59G24	Activated RNA polymerase II transcription cofactor 4 variant (Fragment) OS=Homo sapiens OX=9606 PE=2 SV=1	FALSE	TRUE	17.1642	2	2	2	134	15.1	High	High	High	High	High	High		0.742	1.105	0.556	0.801	0.279215	34.8583	54.3	40.3	41.3	45.7	70.2	39	2	2	2	2	2	2	2.68
High	A0A024RCG2	Solute carrier family 22 (Organic cation transporter), member 18, isoform CRA_a OS=Homo sapiens OX=9606 GN=SLC22A18 PE=1 SV=1	FALSE	TRUE	4.48113	2	2	2	424	44.8	High	High	High	High	High	High		0.774	1.047	0.59	0.803667	0.22994	28.6113	37.7	29.2	28.4	29.7	47.1	27.8	2	2	2	2	2	2	4.9
High	Q9NYZ3	G2 and S phase-expressed protein 1 OS=Homo sapiens OX=9606 GN=GTSE1 PE=1 SV=3	FALSE	TRUE	4.58333	2	2	2	720	76.6	High	High	High	High	High	High		0.78	0.994	0.642	0.805333	0.177362	22.0234	25.1	19.5	23.5	23.4	31.3	20.1	2	2	2	2	2	2	5.53
Medium	O43719	HIV Tat-specific factor 1 OS=Homo sapiens OX=9606 GN=HTATSF1 PE=1 SV=1	FALSE	TRUE	1.98675	2	2	2	755	85.8	High	High	High	High	High	High		0.865	1.017	0.534	0.805333	0.246966	30.6663	57.8	50	50.9	51.8	76.2	40.7	2	2	2	2	2	2	4.55
High	B4DT46	cDNA FLJ57889, highly similar to Cytochrome b-245 light chain OS=Homo sapiens OX=9606 PE=2 SV=1	FALSE	TRUE	12.9771	2	2	2	131	14	High	High	High	High	High	High		0.825	0.931	0.663	0.806333	0.134972	16.7389	32	26.4	30.5	28.4	41.9	27.8	1	1	1	1	1	1	6.74
High	Q9H4L7	SWI/SNF-related matrix-associated actin-dependent regulator of chromatin subfamily A containing DEAD/H box 1 OS=Homo sapiens OX=9606 GN=SMARCAD1 PE=1 SV=2	FALSE	TRUE	1.94932	2	2	2	1026	117.3	High	High	High	High	High	High		0.704	1.032	0.687	0.807667	0.194464	24.0773	72.1	50.8	66.9	69.1	115.2	79.1	1	1	1	1	1	1	5.73
High	Q9BWU0	Kanadaptin OS=Homo sapiens OX=9606 GN=SLC4A1AP PE=1 SV=1	FALSE	TRUE	3.26633	2	2	2	796	88.8	High	High	High	High	High	High		0.783	0.981	0.662	0.808667	0.161041	19.9144	23.5	18.4	18.7	18.4	29.6	19.6	1	1	1	1	1	1	7.37
High	A0A140TA86	MICOS complex subunit MIC13 OS=Homo sapiens OX=9606 GN=C19orf70 PE=1 SV=1	FALSE	TRUE	10	2	2	2	140	15.4	High	High	High	High	High	High		0.769	0.886	0.775	0.81	0.0658863	8.13411	11.2	8.6	10.7	9.5	14.2	11	1	1	1	1	1	1	1.92
High	J3QQJ0	SAP30-binding protein (Fragment) OS=Homo sapiens OX=9606 GN=SAP30BP PE=1 SV=1	FALSE	TRUE	7.07692	2	2	2	325	35.9	High	High	High	High	High	High		0.765	1.141	0.525	0.810333	0.310492	38.3166	46.6	35.7	32.7	37.3	56.4	29.6	2	2	2	2	2	2	7.23
High	B3KS98	Eukaryotic translation initiation factor 3 subunit H OS=Homo sapiens OX=9606 GN=EIF3H PE=1 SV=1	FALSE	TRUE	5.46448	2	2	2	366	41.6	High	High	High	High	High	High		0.983	0.975	0.478	0.812	0.28928	35.6256	22.5	22.1	18.4	17.9	29.7	14.2	1	1	1	1	1	1	5.41
High	Q9ULJ3	Zinc finger and BTB domain-containing protein 21 OS=Homo sapiens OX=9606 GN=ZBTB21 PE=1 SV=2	FALSE	TRUE	2.81426	2	2	2	1066	118.8	High	High	High	High	High	High		0.749	0.916	0.772	0.812333	0.0905115	11.1422	22.3	16.7	18.5	16.9	27.6	21.3	1	1	1	1	1	1	2.08
High	Q99943	1-acyl-sn-glycerol-3-phosphate acyltransferase alpha OS=Homo sapiens OX=9606 GN=AGPAT1 PE=1 SV=2	FALSE	TRUE	5.65371	2	2	2	283	31.7	High	High	High	High	High	High		0.822	1.039	0.578	0.813	0.230632	28.368	21.9	18	19.1	19.8	27.7	16	1	1	1	1	1	1	2.04
High	A0A2X0SFQ7	BCR (Fragment) OS=Homo sapiens OX=9606 GN=BCR PE=4 SV=1	FALSE	TRUE	1.7282	2	2	1	1273	143	High	High	High	High	High	High		1.015	0.942	0.487	0.814667	0.286105	35.1193	20.1	20.4	22	20.7	31	15.1	1	1	1	1	1	1	2.35
High	S4R3E9	NEDD8-MDP1 readthrough OS=Homo sapiens OX=9606 GN=NEDD8-MDP1 PE=4 SV=1	TRUE	TRUE	20.2381	2	3	2	84	9.7	High	High	High	High	High	High		0.892	1.011	0.543	0.815333	0.243237	29.8329	74.4	66.4	62.3	63	100	54.3	2	2	2	2	2	2	6.83
High	A0A024R0C0	Choline/ethanolamine phosphotransferase 1, isoform CRA_b OS=Homo sapiens OX=9606 GN=CEPT1 PE=3 SV=1	FALSE	TRUE	4.08654	2	2	2	416	46.5	High	High	High	High	High	High		0.665	1.113	0.668	0.815333	0.257791	31.6179	34.7	23.1	30.3	33.7	44.9	30	2	2	2	2	2	2	5.33
High	H3BM74	NEDD8 ultimate buster 1 OS=Homo sapiens OX=9606 GN=NUB1 PE=1 SV=1	FALSE	TRUE	4.06886	2	2	2	639	73.3	High	High	High	High	High	High		0.78	1.1	0.567	0.815667	0.268284	32.8914	14.1	11	9.9	10.9	17.1	9.7	1	1	1	1	1	1	6.67
High	A0A1B0GUA3	KIF1-binding protein OS=Homo sapiens OX=9606 GN=KIF1BP PE=1 SV=1	FALSE	TRUE	4.48916	2	2	2	646	74.7	High	High	High	High	High	High		0.817	1.05	0.581	0.816	0.234502	28.7379	27.3	22.3	19.6	20.6	39.1	22.7	2	2	2	2	2	2	6.77
High	O43513	Mediator of RNA polymerase II transcription subunit 7 OS=Homo sapiens OX=9606 GN=MED7 PE=1 SV=1	FALSE	TRUE	11.1588	2	2	2	233	27.2	High	High	High	High	High	High		0.832	0.865	0.752	0.816333	0.0581062	7.11795	13	10.8	9.7	8.4	12.1	9.1	1	1	1	1	1	1	6.13
High	Q92878	DNA repair protein RAD50 OS=Homo sapiens OX=9606 GN=RAD50 PE=1 SV=1	FALSE	TRUE	1.29573	2	2	2	1312	153.8	High	High	High	High	High	High		0.732	1.136	0.584	0.817333	0.285722	34.9579	16.4	12	11.8	13.4	21.9	12.8	1	1	1	1	1	1	4.4
Medium	P42695	Condensin-2 complex subunit D3 OS=Homo sapiens OX=9606 GN=NCAPD3 PE=1 SV=2	FALSE	TRUE	1.13485	2	2	2	1498	168.8	Medium	Medium	Medium	Medium	Medium	Medium		0.863	1.099	0.49	0.817333	0.307058	37.5682	35.1	30.3	27.5	30.2	48.8	23.9	1	1	1	1	1	1	0
High	Q53GW1	Vesicle transport-related protein isoform a variant (Fragment) OS=Homo sapiens OX=9606 PE=2 SV=1	FALSE	TRUE	3.27103	2	2	2	642	72.3	High	High	High	High	High	High		0.931	1.047	0.476	0.818	0.301806	36.8956	11.7	10.9	12.3	12.9	16.8	8	1	1	1	1	1	1	4.34
High	B2R8P6	cDNA, FLJ94000, highly similar to Homo sapiens solute carrier family 27 (fatty acid transporter),member 6 (SLC27A6), mRNA OS=Homo sapiens OX=9606 PE=2 SV=1	FALSE	TRUE	3.55412	2	2	2	619	70	High	High	High	High	High	High		0.799	1.168	0.488	0.818333	0.340412	41.5982	25.5	20.4	24.7	28.9	37.3	18.2	1	1	1	1	1	1	0
Medium	Q8WWH4	Ankyrin repeat, SAM and basic leucine zipper domain-containing protein 1 OS=Homo sapiens OX=9606 GN=ASZ1 PE=2 SV=1	FALSE	TRUE	7.36842	2	3	2	475	53.4	Medium	Medium	Medium	Medium	Medium	Medium		0.724	1.064	0.668	0.818667	0.214302	26.177	219.1	158.6	165.7	176.3	271.4	181.2	2	2	2	2	2	2	4.99
High	B3KQB4	PRA1 family protein OS=Homo sapiens OX=9606 PE=2 SV=1	FALSE	TRUE	9.57447	2	2	2	188	21.5	High	High	High	High	High	High		0.951	0.884	0.622	0.819	0.173865	21.2289	44.2	42	45.1	39.9	71.1	44.2	2	2	2	2	2	2	5.27
High	Q8WYQ5	Microprocessor complex subunit DGCR8 OS=Homo sapiens OX=9606 GN=DGCR8 PE=1 SV=1	FALSE	TRUE	2.19922	2	2	2	773	86	High	High	High	High	High	High		0.619	1.309	0.529	0.819	0.426732	52.104	28.2	17.4	19	24.9	33.1	17.5	1	1	1	1	1	1	2.53
High	A0A024R9G3	Derlin OS=Homo sapiens OX=9606 GN=DERL1 PE=3 SV=1	FALSE	TRUE	7.56972	2	3	2	251	28.8	High	High	High	High	High	High		0.933	1.075	0.452	0.82	0.32651	39.8183	23.9	22.3	19.3	20.8	33.2	15	1	1	1	1	1	1	9.37
High	Q5BJF2	Sigma intracellular receptor 2 OS=Homo sapiens OX=9606 GN=TMEM97 PE=1 SV=1	FALSE	TRUE	10.2273	2	2	2	176	20.8	High	High	High	High	High	High		0.77	0.988	0.706	0.821333	0.147842	18.0003	16.5	12.7	15.5	15.3	23.5	16.6	1	1	1	1	1	1	4.52
High	B2R713	cDNA, FLJ93224 OS=Homo sapiens OX=9606 PE=2 SV=1	FALSE	TRUE	4.36562	2	2	2	733	81.7	High	High	High	High	High	High		0.93	1.093	0.444	0.822333	0.33763	41.0576	24.3	22.6	17.7	19.4	32.9	14.6	1	1	1	1	1	1	7.58
High	Q96EY1	DnaJ homolog subfamily A member 3, mitochondrial OS=Homo sapiens OX=9606 GN=DNAJA3 PE=1 SV=2	FALSE	TRUE	4.375	2	2	2	480	52.5	High	High	High	High	High	High		0.936	0.963	0.568	0.822333	0.220672	26.8349	29.7	27.8	24.4	23.5	35.2	20	1	1	1	1	1	1	4.09
High	P23284	Peptidyl-prolyl cis-trans isomerase B OS=Homo sapiens OX=9606 GN=PPIB PE=1 SV=2	FALSE	TRUE	10.1852	2	2	2	216	23.7	High	High	High	High	High	High		0.998	0.548	0.926	0.824	0.241719	29.3348	19.8	19.8	24.1	13.2	25.7	23.8	1	1	1	1	1	1	4.71
High	Q8NFD5	AT-rich interactive domain-containing protein 1B OS=Homo sapiens OX=9606 GN=ARID1B PE=1 SV=2	FALSE	TRUE	0.626118	2	2	2	2236	236	High	High	High	High	High	High		0.961	1.032	0.485	0.826	0.297441	36.0098	12.9	12.4	12	12.4	22.9	11.1	1	1	1	1	1	1	5.16
High	Q9Y6G9	Cytoplasmic dynein 1 light intermediate chain 1 OS=Homo sapiens OX=9606 GN=DYNC1LI1 PE=1 SV=3	FALSE	TRUE	3.63289	2	2	2	523	56.5	High	High	High	High	High	High		0.956	0.945	0.577	0.826	0.21571	26.1151	33.6	32.1	36.3	34.3	50.1	28.9	2	2	2	2	2	2	5.32
High	O75340	Programmed cell death protein 6 OS=Homo sapiens OX=9606 GN=PDCD6 PE=1 SV=1	FALSE	TRUE	12.0419	2	2	2	191	21.9	High	High	High	High	High	High		0.945	1.024	0.514	0.827667	0.2745	33.1655	12.7	12	11.6	11.9	17.5	9	1	1	1	1	1	1	5.83
High	B3KP18	cDNA FLJ30946 fis, clone FEBRA2007622, highly similar to RAD50-interacting protein 1 OS=Homo sapiens OX=9606 PE=2 SV=1	FALSE	TRUE	1.89394	2	2	2	792	90.5	High	High	High	High	High	High		1.018	0.937	0.528	0.827667	0.26266	31.735	11.4	11.6	13.1	12.3	15.9	8.4	1	1	1	1	1	1	5.41
High	Q8IZ52	Chondroitin sulfate synthase 2 OS=Homo sapiens OX=9606 GN=CHPF PE=1 SV=2	FALSE	TRUE	2.83871	2	2	2	775	85.4	High	High	High	High	High	High		0.8	1.153	0.532	0.828333	0.311468	37.6018	40.1	32.1	29.8	34.4	47.7	25.4	2	2	2	2	2	2	3.27
High	P41162	ETS translocation variant 3 OS=Homo sapiens OX=9606 GN=ETV3 PE=1 SV=2	FALSE	TRUE	5.27344	2	3	2	512	57	High	High	High	High	High	High		0.957	1.072	0.459	0.829333	0.325832	39.2884	11.6	11.1	9.3	10	21.8	10	1	1	1	1	1	1	7.7
High	P28074	Proteasome subunit beta type-5 OS=Homo sapiens OX=9606 GN=PSMB5 PE=1 SV=3	FALSE	TRUE	9.5057	2	2	2	263	28.5	High	High	High	High	High	High		0.772	1.052	0.665	0.829667	0.199841	24.0869	58	44.8	47.8	50.3	67.8	45.1	2	2	2	2	2	2	6.56
High	Q9NVM6	DnaJ homolog subfamily C member 17 OS=Homo sapiens OX=9606 GN=DNAJC17 PE=1 SV=1	FALSE	TRUE	5.92105	2	2	2	304	34.7	High	High	High	High	High	High		0.613	1.055	0.821	0.829667	0.221127	26.6526	18.6	11.4	13.1	13.8	13.4	11	1	1	1	1	1	1	4.84
High	Q96FZ2	Embryonic stem cell-specific 5-hydroxymethylcytosine-binding protein OS=Homo sapiens OX=9606 GN=HMCES PE=1 SV=1	FALSE	TRUE	6.77966	2	3	2	354	40.5	High	High	High	High	High	High		0.826	1.096	0.569	0.830333	0.263527	31.7375	35.6	29.4	27.3	29.9	46.6	26.5	2	2	2	2	2	2	7.1
High	O14641	Segment polarity protein dishevelled homolog DVL-2 OS=Homo sapiens OX=9606 GN=DVL2 PE=1 SV=1	FALSE	TRUE	2.85326	2	2	1	736	78.9	High	High	Not Found	Not Found	High	High		0.828	1.117	0.552	0.832333	0.282525	33.9437	50.2	41.6	40.4	45.1	74.8	41.3	1	1	1	1	1	1	5.51
High	Q69YN2	CWF19-like protein 1 OS=Homo sapiens OX=9606 GN=CWF19L1 PE=1 SV=2	FALSE	TRUE	2.7881	2	2	2	538	60.6	High	High	High	High	High	High		0.894	1.056	0.549	0.833	0.258946	31.0859	73.7	65.9	65.3	69	104.3	57.3	2	2	2	2	2	2	4.8
High	I3L2J1	Mediator of RNA polymerase II transcription subunit 31 OS=Homo sapiens OX=9606 GN=MED31 PE=1 SV=1	FALSE	TRUE	49.1228	2	2	2	57	7	High	High	High	High	High	High		1.144	0.753	0.604	0.833667	0.278891	33.4536	9.8	11.3	8.2	6.2	15.4	9.3	1	1	1	1	1	1	7.46
High	C1PHA2	Tyrosine-protein kinase receptor OS=Homo sapiens OX=9606 GN=KIF5B-ALK PE=2 SV=1	FALSE	TRUE	1.7532	2	2	1	1483	167.8	Not Found	Not Found	Not Found	Not Found	Not Found	Not Found		0.931	1.074	0.498	0.834333	0.299921	35.9473	20.4	19	13.9	14.9	24.1	12	1	1	1	1	1	1	2.26
High	Q8WUM0	Nuclear pore complex protein Nup133 OS=Homo sapiens OX=9606 GN=NUP133 PE=1 SV=2	FALSE	TRUE	2.85467	2	2	2	1156	128.9	High	High	High	High	High	High		1.072	0.882	0.553	0.835667	0.262584	31.4221	26.6	28.5	26.5	23.4	39.6	21.9	1	1	1	1	1	1	4.73
High	Q6P087	Mitochondrial mRNA pseudouridine synthase RPUSD3 OS=Homo sapiens OX=9606 GN=RPUSD3 PE=1 SV=3	FALSE	TRUE	10.2564	2	2	2	351	38.4	High	High	High	High	High	High		0.998	0.914	0.6	0.837333	0.209784	25.0538	42.5	42.4	37.5	34.3	55.5	33.3	1	1	1	1	1	1	6.35
High	P30041	Peroxiredoxin-6 OS=Homo sapiens OX=9606 GN=PRDX6 PE=1 SV=3	FALSE	TRUE	8.03571	2	2	2	224	25	High	High	High	High	High	High		0.874	0.624	1.014	0.837333	0.197569	23.595	21.7	19	30	18.7	22	22.3	1	1	1	1	1	1	3.94
High	P51572	B-cell receptor-associated protein 31 OS=Homo sapiens OX=9606 GN=BCAP31 PE=1 SV=3	FALSE	TRUE	8.53659	2	2	2	246	28	High	High	High	High	High	High		1.109	0.397	1.009	0.838333	0.385462	45.9796	21.6	24	43.1	17.1	33.8	34.1	2	2	2	2	2	2	5.5
High	B4DL85	cDNA FLJ60660, highly similar to Hematological and neurological expressed1-like protein OS=Homo sapiens OX=9606 PE=2 SV=1	FALSE	TRUE	17.3077	2	2	2	208	22.1	High	High	High	High	High	High		0.8	1.089	0.629	0.839333	0.232509	27.7016	64.7	51.7	50.9	55.4	81.2	51.1	2	2	2	2	2	2	2.71
High	Q96ET8	Golgi apparatus membrane protein TVP23 homolog C OS=Homo sapiens OX=9606 GN=TVP23C PE=1 SV=3	FALSE	TRUE	2.89855	2	2	2	276	31.1	High	High	High	High	High	High		0.758	1.115	0.648	0.840333	0.244144	29.0532	45.2	34.2	35.5	39.6	56.8	36.8	2	2	2	2	2	2	5.23
High	A0A0S2Z3W7	Nucleotide diphosphatase (Fragment) OS=Homo sapiens OX=9606 GN=ITPA PE=2 SV=1	FALSE	TRUE	14.433	2	2	2	194	21.4	High	High	High	High	High	High		0.895	1.096	0.538	0.843	0.282611	33.5244	64.1	57.3	52.5	57.5	87.5	47.1	2	2	2	2	2	2	3.04
High	Q9BRU9	rRNA-processing protein UTP23 homolog OS=Homo sapiens OX=9606 GN=UTP23 PE=1 SV=2	FALSE	TRUE	9.63855	2	2	2	249	28.4	High	High	High	High	High	High		0.892	1.048	0.601	0.847	0.226872	26.7854	48.1	42.9	42.2	44.2	65.7	39.5	1	1	1	1	1	1	5.47
High	D6W4Z6	HCG23833, isoform CRA_b OS=Homo sapiens OX=9606 GN=hCG_23833 PE=4 SV=1	FALSE	TRUE	6.23608	2	2	1	449	51	High	High	High	High	High	High		0.893	1.08	0.573	0.848667	0.256391	30.211	45.2	40.4	41.1	44.4	61.1	35	1	1	1	1	1	1	5.17
High	O15164	Transcription intermediary factor 1-alpha OS=Homo sapiens OX=9606 GN=TRIM24 PE=1 SV=3	FALSE	TRUE	1.42857	2	2	1	1050	116.8	Medium	Medium	Medium	Medium	Medium	Medium		0.873	0.997	0.685	0.851667	0.15709	18.445	22	19.2	20	19.9	25.7	17.6	1	1	1	1	1	1	4.82
High	Q9BQ24	Zinc finger FYVE domain-containing protein 21 OS=Homo sapiens OX=9606 GN=ZFYVE21 PE=1 SV=1	FALSE	TRUE	5.55556	2	2	2	234	26.5	High	High	High	High	High	High		1.101	0.997	0.469	0.855667	0.338877	39.6038	20.9	23	21.6	21.5	30.5	14.3	1	1	1	1	1	1	3.84
High	A0A0B4J2E5	Uncharacterized protein OS=Homo sapiens OX=9606 GN=LOC102724159 PE=1 SV=1	FALSE	TRUE	2.28509	2	2	2	919	102.4	High	High	High	High	High	High		0.826	1.211	0.537	0.858	0.338138	39.41	20.2	16.7	16.3	19.7	24.4	13.1	1	1	1	1	1	1	4.76
High	A0A024R1U0	Ran GTPase activating protein 1, isoform CRA_d OS=Homo sapiens OX=9606 GN=RANGAP1 PE=4 SV=1	FALSE	TRUE	3.74787	2	2	2	587	63.5	High	High	High	High	High	High		0.88	1.102	0.592	0.858	0.255711	29.8031	23.4	20.6	19.1	21.1	27.2	16.1	1	1	1	1	1	1	6.75
High	V9HW88	Calreticulin, isoform CRA_b OS=Homo sapiens OX=9606 GN=HEL-S-99n PE=2 SV=1	FALSE	TRUE	5.27578	2	2	2	417	48.1	High	High	High	High	High	High		0.828	0.611	1.136	0.858333	0.263811	30.7353	38.1	31.5	63.6	38.8	51.3	58.3	2	2	2	2	2	2	4.81
High	P49458	Signal recognition particle 9 kDa protein OS=Homo sapiens OX=9606 GN=SRP9 PE=1 SV=2	FALSE	TRUE	19.7674	2	2	2	86	10.1	High	High	High	High	High	High		0.92	1.055	0.602	0.859	0.232579	27.0756	125.6	115.5	110.2	116.2	169.1	101.8	1	1	1	1	1	1	2.21
High	P52735	Guanine nucleotide exchange factor VAV2 OS=Homo sapiens OX=9606 GN=VAV2 PE=1 SV=2	FALSE	TRUE	2.84738	2	2	2	878	101.2	High	High	High	High	High	High		0.826	1.184	0.569	0.859667	0.308879	35.9301	30.5	25.2	25	29.6	46.9	26.7	1	1	1	1	1	1	3.79
Medium	O43149	Zinc finger ZZ-type and EF-hand domain-containing protein 1 OS=Homo sapiens OX=9606 GN=ZZEF1 PE=1 SV=6	FALSE	TRUE	0.607903	2	3	1	2961	330.9	Medium	Medium	Medium	Medium	Medium	Medium		0.975	0.979	0.633	0.862333	0.198619	23.0327	19.4	18.9	13	12.7	19.9	12.6	1	1	1	1	1	1	4.89
High	Q96F86	Enhancer of mRNA-decapping protein 3 OS=Homo sapiens OX=9606 GN=EDC3 PE=1 SV=1	FALSE	TRUE	3.34646	2	2	2	508	56	High	High	High	High	High	High		0.745	1.19	0.653	0.862667	0.287187	33.2906	105.8	78.8	78.9	93.9	126.3	82.5	2	2	2	2	2	2	5.15
High	Q9HCD5	Nuclear receptor coactivator 5 OS=Homo sapiens OX=9606 GN=NCOA5 PE=1 SV=2	FALSE	TRUE	3.79965	2	2	2	579	65.5	High	High	High	High	High	High		0.823	1.059	0.712	0.864667	0.177213	20.4949	30.6	25.2	27.1	28.7	35.8	25.5	2	2	2	2	2	2	4.08
High	Q6P1M0	Long-chain fatty acid transport protein 4 OS=Homo sapiens OX=9606 GN=SLC27A4 PE=1 SV=1	FALSE	TRUE	2.02177	2	2	2	643	72	High	High	High	High	High	High		0.933	1.175	0.487	0.865	0.349004	40.3473	13.4	12.5	8.5	10	19.3	9.4	1	1	1	1	1	1	3.77
High	Q9Y606	tRNA pseudouridine synthase A OS=Homo sapiens OX=9606 GN=PUS1 PE=1 SV=3	FALSE	TRUE	5.8548	2	2	2	427	47.4	High	High	High	High	High	High		1.088	0.843	0.667	0.866	0.21144	24.4157	11.5	12.5	10.3	8.7	18.9	12.6	1	1	1	1	1	1	5.06
Medium	P61513	60S ribosomal protein L37a OS=Homo sapiens OX=9606 GN=RPL37A PE=1 SV=2	FALSE	TRUE	26.087	2	2	2	92	10.3	High	High	High	High	High	High		0.926	0.907	0.776	0.869667	0.0816721	9.3912	60.6	56.1	64.8	58.8	79.4	61.6	1	1	1	1	1	1	4.56
High	X6R8A1	Carboxypeptidase OS=Homo sapiens OX=9606 GN=CTSA PE=1 SV=1	FALSE	TRUE	4.81928	2	2	2	498	56.2	High	High	High	High	High	High		1.039	0.987	0.592	0.872667	0.244451	28.012	20.9	21.7	20.9	20.6	28.2	16.7	1	1	1	1	1	1	5.77
High	Q96TA1	Niban-like protein 1 OS=Homo sapiens OX=9606 GN=FAM129B PE=1 SV=3	FALSE	TRUE	2.54692	2	2	2	746	84.1	High	High	High	High	High	High		0.853	1.421	0.345	0.873	0.538279	61.6585	13.8	11.8	11.6	16.5	20	6.9	1	1	1	1	1	1	4.8
High	O75964	ATP synthase subunit g, mitochondrial OS=Homo sapiens OX=9606 GN=ATP5L PE=1 SV=3	FALSE	TRUE	23.301	2	2	2	103	11.4	High	High	High	High	High	High		0.902	1.167	0.551	0.873333	0.308999	35.3816	32.7	29.5	22.3	26	42.5	23.4	1	1	1	1	1	1	5.42
High	D3DUE7	Cytokine-like nuclear factor n-pac, isoform CRA_a OS=Homo sapiens OX=9606 GN=N-PAC PE=4 SV=1	FALSE	TRUE	3.51494	2	2	2	569	62.1	High	High	High	High	High	High		0.847	1.059	0.725	0.877	0.169009	19.2713	30.1	25.5	30.3	32.1	39.6	28.7	1	1	1	1	1	1	5.29
High	A0A024RBB2	Solute carrier family 16 (Monocarboxylic acid transporters), member 7, isoform CRA_a OS=Homo sapiens OX=9606 GN=SLC16A7 PE=4 SV=1	FALSE	TRUE	3.34728	2	2	2	478	52.2	High	High	High	High	High	High		0.991	0.942	0.699	0.877333	0.156372	17.8236	32.4	32.1	29.3	27.6	43.5	30.4	2	2	2	2	2	2	2.26
Medium	Q9Y6X9	MORC family CW-type zinc finger protein 2 OS=Homo sapiens OX=9606 GN=MORC2 PE=1 SV=2	FALSE	TRUE	1.25969	2	2	1	1032	117.8	Medium	Medium	Medium	Medium	Medium	Medium		0.938	1.114	0.581	0.877667	0.271574	30.9427	47.1	44.2	32.4	36.1	59.7	34.7	1	1	1	1	1	1	4.13
High	Q69YH5	Cell division cycle-associated protein 2 OS=Homo sapiens OX=9606 GN=CDCA2 PE=1 SV=2	FALSE	TRUE	2.44379	2	2	2	1023	112.6	High	High	High	High	High	High		0.741	1.4	0.5	0.880333	0.465897	52.9228	47.1	34.9	31.8	44.5	72	36	2	2	2	2	2	2	3.45
High	Q9H845	Acyl-CoA dehydrogenase family member 9, mitochondrial OS=Homo sapiens OX=9606 GN=ACAD9 PE=1 SV=1	FALSE	TRUE	4.1868	2	2	2	621	68.7	High	High	High	High	High	High		0.887	1.186	0.57	0.881	0.308044	34.9652	21.3	18.9	13.7	16.2	27.9	15.9	1	1	1	1	1	1	5.43
High	A0A024R0A8	Adenosylhomocysteinase OS=Homo sapiens OX=9606 GN=AHCYL1 PE=3 SV=1	FALSE	TRUE	5.28302	2	2	2	530	58.9	High	High	High	High	High	High		0.614	1.329	0.7	0.881	0.390355	44.3082	45.5	28	28.2	37.5	46.4	32.5	2	2	2	2	2	2	5.21
High	B2R9W9	Craniofacial development protein 1 OS=Homo sapiens OX=9606 PE=2 SV=1	FALSE	TRUE	9.36455	2	2	2	299	33.6	High	High	High	High	High	High		0.806	1.346	0.494	0.882	0.431055	48.8724	49.7	40	31.6	42.5	67.4	33.3	1	1	1	1	1	1	6.09
High	A0A024R601	Ceroid-lipofuscinosis neuronal 6 late infantile variant isoform 1 OS=Homo sapiens OX=9606 GN=CLN6 PE=2 SV=1	FALSE	TRUE	10.2894	2	3	2	311	35.9	High	High	High	High	High	High		1.073	1.13	0.447	0.883333	0.378949	42.8999	17.8	19.1	12.4	14	31.1	13.9	1	1	1	1	1	1	10.58
High	Q32P45	GTPase activating protein (SH3 domain) binding protein 1 OS=Homo sapiens OX=9606 GN=G3BP1 PE=2 SV=1	FALSE	TRUE	3.43348	2	2	1	466	52.1	High	High	High	High	High	High		0.896	1.106	0.648	0.883333	0.229263	25.9543	12.5	11.2	12.1	13.4	21	13.6	1	1	1	1	1	1	3.7
High	Q15800	Methylsterol monooxygenase 1 OS=Homo sapiens OX=9606 GN=MSMO1 PE=1 SV=1	FALSE	TRUE	8.53242	2	3	2	293	35.2	High	High	High	High	High	High		0.951	1.076	0.624	0.883667	0.233402	26.4129	55.8	53.1	45.4	48.9	74.5	46.5	2	2	2	2	2	2	12.48
High	B2RBJ7	cDNA, FLJ95547, highly similar to Homo sapiens nuclear receptor coactivator 6 interacting protein (NCOA6IP), mRNA OS=Homo sapiens OX=9606 PE=2 SV=1	FALSE	TRUE	1.99297	2	2	2	853	96.5	High	High	High	High	High	High		0.848	1.263	0.546	0.885667	0.359981	40.6452	9.9	8.4	8.2	10.4	15.2	8.3	1	1	1	1	1	1	4.88
High	I6L8A6	DNA endonuclease RBBP8 OS=Homo sapiens OX=9606 GN=RBBP8 PE=1 SV=1	FALSE	TRUE	1.77384	2	2	2	902	102.5	High	High	High	High	High	High		0.923	1.2	0.535	0.886	0.33404	37.7021	28.8	26.6	25.9	31.1	46.5	24.9	2	2	2	2	2	2	3.17
High	B4DNB9	cDNA FLJ53069, highly similar to AP-2 complex subunit mu-1 OS=Homo sapiens OX=9606 PE=2 SV=1	FALSE	TRUE	3.69565	2	2	2	460	52.3	High	High	High	High	High	High		0.836	1.173	0.654	0.887667	0.263329	29.6653	43.5	36.4	40.3	47.3	55.2	36.1	1	1	1	1	1	1	5.7
High	P52655	Transcription initiation factor IIA subunit 1 OS=Homo sapiens OX=9606 GN=GTF2A1 PE=1 SV=1	FALSE	TRUE	4.52128	2	2	2	376	41.5	High	High	High	High	High	High		0.785	1.341	0.547	0.891	0.407475	45.7323	30	23.5	21.7	29.1	41.5	22.7	2	2	2	2	2	2	4.32
[truncated: 754 more rows]
