# Supplementary material for: ZC3H4 restricts non-coding transcription in human cells
Source: eLife. 2021 Apr 29;10:e67305. doi: 10.7554/eLife.67305 (PMC8137146; doi:10.7554/eLife.67305)
Supplement: Supplementary file 2. [file elife-67305-supp2.csv]

UniRef100 cluster ID	UniRef100 cluster size	representative sequence ID	annotation	sequence length	PTHR13119 domain start-stop	hmmer domain C-evalue	hmmer domain score	representative species	common TaxID	common taxonomic lineage
UniRef100_Q0UVJ8	1	Q0UVJ8	Uncharacterized protein	1211	1-1135	1.4e-188	630.3	Phaeosphaeria nodorum (strain SN15 / ATCC MYA-4574 / FGSC 10173) (Glume blotch fungus) (Parastagonospora nodorum)	321614	cellular organisms;Eukaryota;Opisthokonta;Fungi;Dikarya;Ascomycota;saccharomyceta;Pezizomycotina;leotiomyceta;dothideomyceta;Dothideomycetes;Pleosporomycetidae;Pleosporales;Pleosporineae;Phaeosphaeriaceae;Parastagonospora;Parastagonospora nodorum;Parastagonospora nodorum SN15
UniRef100_A0A178BE08	1	A0A178BE08	Uncharacterized protein	732	1-724	3.2e-173	579.4	Stagonospora sp. SRC1lsM3a	765868	cellular organisms;Eukaryota;Opisthokonta;Fungi;Dikarya;Ascomycota;saccharomyceta;Pezizomycotina;leotiomyceta;dothideomyceta;Dothideomycetes;Pleosporomycetidae;Pleosporales;Massarineae;Massarinaceae;Stagonospora;Stagonospora sp. SRC1lsM3a
UniRef100_A0A364NE83	1	A0A364NE83	Ccch zinc finger and smr domain-containing protein	728	1-718	5e-164	549.0	Stemphylium lycopersici	183478	cellular organisms;Eukaryota;Opisthokonta;Fungi;Dikarya;Ascomycota;saccharomyceta;Pezizomycotina;leotiomyceta;dothideomyceta;Dothideomycetes;Pleosporomycetidae;Pleosporales;Pleosporineae;Pleosporaceae;Stemphylium;Stemphylium lycopersici
UniRef100_W6YIP4	2	W6YIP4	Uncharacterized protein	725	1-710	4.2e-157	526.1	Bipolaris zeicola 26-R-13	33194	cellular organisms;Eukaryota;Opisthokonta;Fungi;Dikarya;Ascomycota;saccharomyceta;Pezizomycotina;leotiomyceta;dothideomyceta;Dothideomycetes;Pleosporomycetidae;Pleosporales;Pleosporineae;Pleosporaceae;Bipolaris
UniRef100_M2SLU0	1	M2SLU0	Uncharacterized protein	725	1-710	1.9e-155	520.6	Cochliobolus sativus (strain ND90Pr / ATCC 201652) (Common root rot and spot blotch fungus) (Bipolaris sorokiniana)	665912	cellular organisms;Eukaryota;Opisthokonta;Fungi;Dikarya;Ascomycota;saccharomyceta;Pezizomycotina;leotiomyceta;dothideomyceta;Dothideomycetes;Pleosporomycetidae;Pleosporales;Pleosporineae;Pleosporaceae;Bipolaris;Bipolaris sorokiniana;Bipolaris sorokiniana ND90Pr
UniRef100_W6ZCE5	1	W6ZCE5	Uncharacterized protein	725	1-710	1.6e-154	517.6	Bipolaris oryzae ATCC 44560	930090	cellular organisms;Eukaryota;Opisthokonta;Fungi;Dikarya;Ascomycota;saccharomyceta;Pezizomycotina;leotiomyceta;dothideomyceta;Dothideomycetes;Pleosporomycetidae;Pleosporales;Pleosporineae;Pleosporaceae;Bipolaris;Bipolaris oryzae;Bipolaris oryzae ATCC 44560
UniRef100_N4X398	2	N4X398	Uncharacterized protein	725	1-710	8.9e-155	518.4	Cochliobolus heterostrophus (strain C4 / ATCC 48331 / race T) (Southern corn leaf blight fungus) (Bipolaris maydis)	5016	cellular organisms;Eukaryota;Opisthokonta;Fungi;Dikarya;Ascomycota;saccharomyceta;Pezizomycotina;leotiomyceta;dothideomyceta;Dothideomycetes;Pleosporomycetidae;Pleosporales;Pleosporineae;Pleosporaceae;Bipolaris;Bipolaris maydis
UniRef100_R0IWF0	1	R0IWF0	Uncharacterized protein	727	1-712	1.3e-155	521.2	Setosphaeria turcica (strain 28A) (Northern leaf blight fungus) (Exserohilum turcicum)	671987	cellular organisms;Eukaryota;Opisthokonta;Fungi;Dikarya;Ascomycota;saccharomyceta;Pezizomycotina;leotiomyceta;dothideomyceta;Dothideomycetes;Pleosporomycetidae;Pleosporales;Pleosporineae;Pleosporaceae;Exserohilum;Exserohilum turcicum;Exserohilum turcica Et28A
UniRef100_A0A177DAP0	1	A0A177DAP0	CCCH zinc finger and SMR domain-containing protein	727	1-718	5.2e-160	535.7	Alternaria alternata (Alternaria rot fungus) (Torula alternata)	5599	cellular organisms;Eukaryota;Opisthokonta;Fungi;Dikarya;Ascomycota;saccharomyceta;Pezizomycotina;leotiomyceta;dothideomyceta;Dothideomycetes;Pleosporomycetidae;Pleosporales;Pleosporineae;Pleosporaceae;Alternaria;Alternaria sect. Alternaria;Alternaria alternata complex;Alternaria alternata
UniRef100_A0A4Q4NQH5	3	A0A4Q4NQH5	Uncharacterized protein	727	1-718	7.6e-160	535.2	Alternaria alternata (Alternaria rot fungus) (Torula alternata)	2499237	cellular organisms;Eukaryota;Opisthokonta;Fungi;Dikarya;Ascomycota;saccharomyceta;Pezizomycotina;leotiomyceta;dothideomyceta;Dothideomycetes;Pleosporomycetidae;Pleosporales;Pleosporineae;Pleosporaceae;Alternaria;Alternaria sect. Alternaria
UniRef100_A0A4V1X575	1	A0A4V1X575	Uncharacterized protein	727	1-718	1.6e-159	534.2	Alternaria tenuissima	119927	cellular organisms;Eukaryota;Opisthokonta;Fungi;Dikarya;Ascomycota;saccharomyceta;Pezizomycotina;leotiomyceta;dothideomyceta;Dothideomycetes;Pleosporomycetidae;Pleosporales;Pleosporineae;Pleosporaceae;Alternaria;Alternaria sect. Alternaria;Alternaria alternata complex;Alternaria tenuissima
UniRef100_A0A4Q4SBV9	1	A0A4Q4SBV9	Uncharacterized protein	727	1-718	9.5e-160	534.9	Alternaria arborescens	156630	cellular organisms;Eukaryota;Opisthokonta;Fungi;Dikarya;Ascomycota;saccharomyceta;Pezizomycotina;leotiomyceta;dothideomyceta;Dothideomycetes;Pleosporomycetidae;Pleosporales;Pleosporineae;Pleosporaceae;Alternaria;Alternaria sect. Alternaria;Alternaria arborescens
UniRef100_E3S9J8	1	E3S9J8	Uncharacterized protein	725	1-711	1.3e-159	534.4	Pyrenophora teres f. teres (strain 0-1) (Barley net blotch fungus) (Drechslera teres f. teres)	861557	cellular organisms;Eukaryota;Opisthokonta;Fungi;Dikarya;Ascomycota;saccharomyceta;Pezizomycotina;leotiomyceta;dothideomyceta;Dothideomycetes;Pleosporomycetidae;Pleosporales;Pleosporineae;Pleosporaceae;Pyrenophora;Pyrenophora teres;Pyrenophora teres f. teres;Pyrenophora teres f. teres 0-1
UniRef100_B2WC41	2	B2WC41	CCCH zinc finger and SMR domain containing protein	726	1-717	1.7e-157	527.4	Pyrenophora tritici-repentis (strain Pt-1C-BFP) (Wheat tan spot fungus) (Drechslera tritici-repentis)	45151	cellular organisms;Eukaryota;Opisthokonta;Fungi;Dikarya;Ascomycota;saccharomyceta;Pezizomycotina;leotiomyceta;dothideomyceta;Dothideomycetes;Pleosporomycetidae;Pleosporales;Pleosporineae;Pleosporaceae;Pyrenophora;Pyrenophora tritici-repentis
UniRef100_A0A2W1G7G1	3	A0A2W1G7G1	CCCH zinc finger and SMR domain containing protein	1180	1-716	1e-156	524.8	Pyrenophora tritici-repentis	45151	cellular organisms;Eukaryota;Opisthokonta;Fungi;Dikarya;Ascomycota;saccharomyceta;Pezizomycotina;leotiomyceta;dothideomyceta;Dothideomycetes;Pleosporomycetidae;Pleosporales;Pleosporineae;Pleosporaceae;Pyrenophora;Pyrenophora tritici-repentis
UniRef100_E4ZVL9	1	E4ZVL9	Uncharacterized protein	1285	6-827	1.8e-160	537.2	Leptosphaeria maculans (strain JN3 / isolate v23.1.3 / race Av1-4-5-6-7-8) (Blackleg fungus) (Phoma lingam)	985895	cellular organisms;Eukaryota;Opisthokonta;Fungi;Dikarya;Ascomycota;saccharomyceta;Pezizomycotina;leotiomyceta;dothideomyceta;Dothideomycetes;Pleosporomycetidae;Pleosporales;Pleosporineae;Leptosphaeriaceae;Leptosphaeria;Leptosphaeria maculans species complex;Leptosphaeria maculans;Leptosphaeria maculans 'brassicae' group;Leptosphaeria maculans JN3
UniRef100_A0A178EIV4	1	A0A178EIV4	Uncharacterized protein	733	1-724	9.7e-154	515.0	Pyrenochaeta sp. DS3sAY3a	765867	cellular organisms;Eukaryota;Opisthokonta;Fungi;Dikarya;Ascomycota;saccharomyceta;Pezizomycotina;leotiomyceta;dothideomyceta;Dothideomycetes;Pleosporomycetidae;Pleosporales;Pleosporineae;Cucurbitariaceae;Pyrenochaeta;Pyrenochaeta sp. DS3sAY3a
UniRef100_A0A162VQY1	1	A0A162VQY1	Metal ion binding	730	1-721	2.5e-155	520.2	Didymella rabiei (Chickpea ascochyta blight fungus) (Mycosphaerella rabiei)	5454	cellular organisms;Eukaryota;Opisthokonta;Fungi;Dikarya;Ascomycota;saccharomyceta;Pezizomycotina;leotiomyceta;dothideomyceta;Dothideomycetes;Pleosporomycetidae;Pleosporales;Pleosporineae;Didymellaceae;Ascochyta;Ascochyta rabiei
UniRef100_A0A1Y2M531	1	A0A1Y2M531	Uncharacterized protein	730	2-689	5.9e-149	499.2	Epicoccum nigrum (Soil fungus) (Epicoccum purpurascens)	105696	cellular organisms;Eukaryota;Opisthokonta;Fungi;Dikarya;Ascomycota;saccharomyceta;Pezizomycotina;leotiomyceta;dothideomyceta;Dothideomycetes;Pleosporomycetidae;Pleosporales;Pleosporineae;Didymellaceae;Epicoccum;Epicoccum nigrum
UniRef100_A0A2V1ED82	1	A0A2V1ED82	CCCH zinc finger and SMR domain-containing protein	739	5-731	8.6e-140	468.8	Periconia macrospinosa	97972	cellular organisms;Eukaryota;Opisthokonta;Fungi;Dikarya;Ascomycota;saccharomyceta;Pezizomycotina;leotiomyceta;dothideomyceta;Dothideomycetes;Pleosporomycetidae;Pleosporales;Massarineae;Periconiaceae;Periconia;Periconia macrospinosa
UniRef100_A0A177CPA8	1	A0A177CPA8	Uncharacterized protein	740	10-705	1.9e-135	454.5	Paraphaeosphaeria sporulosa	1460663	cellular organisms;Eukaryota;Opisthokonta;Fungi;Dikarya;Ascomycota;saccharomyceta;Pezizomycotina;leotiomyceta;dothideomyceta;Dothideomycetes;Pleosporomycetidae;Pleosporales;Massarineae;Didymosphaeriaceae;Paraphaeosphaeria;Paraphaeosphaeria sporulosa
UniRef100_A0A2T2ND55	1	A0A2T2ND55	Uncharacterized protein	736	2-706	8.1e-144	482.1	Corynespora cassiicola Philippines	1448308	cellular organisms;Eukaryota;Opisthokonta;Fungi;Dikarya;Ascomycota;saccharomyceta;Pezizomycotina;leotiomyceta;dothideomyceta;Dothideomycetes;Pleosporomycetidae;Pleosporales;Corynesporascaceae;Corynespora;Corynespora cassiicola;Corynespora cassiicola Philippines
UniRef100_A0A1Y1ZY66	1	A0A1Y1ZY66	Uncharacterized protein	742	7-732	4.1e-142	476.5	Clohesyomyces aquaticus	1231657	cellular organisms;Eukaryota;Opisthokonta;Fungi;Dikarya;Ascomycota;saccharomyceta;Pezizomycotina;leotiomyceta;dothideomyceta;Dothideomycetes;Pleosporomycetidae;Pleosporales;Lindgomycetaceae;Clohesyomyces;Clohesyomyces aquaticus
UniRef100_A0A1S8BIM7	1	A0A1S8BIM7	NEDD4-binding protein 2	738	10-687	2.3e-118	397.9	Diplodia seriata	420778	cellular organisms;Eukaryota;Opisthokonta;Fungi;Dikarya;Ascomycota;saccharomyceta;Pezizomycotina;leotiomyceta;dothideomyceta;Dothideomycetes;Dothideomycetes incertae sedis;Botryosphaeriales;Botryosphaeriaceae;Diplodia;Diplodia seriata
UniRef100_A0A1J9QWU7	1	A0A1J9QWU7	Ccch zinc finger and smr domain-containing protein	740	10-691	3.3e-118	397.4	Diplodia corticola	236234	cellular organisms;Eukaryota;Opisthokonta;Fungi;Dikarya;Ascomycota;saccharomyceta;Pezizomycotina;leotiomyceta;dothideomyceta;Dothideomycetes;Dothideomycetes incertae sedis;Botryosphaeriales;Botryosphaeriaceae;Diplodia;Diplodia corticola
UniRef100_R7YQY9	1	R7YQY9	Uncharacterized protein	740	10-693	1.6e-108	365.4	Coniosporium apollinis (strain CBS 100218) (Rock-inhabiting black yeast)	1168221	cellular organisms;Eukaryota;Opisthokonta;Fungi;Dikarya;Ascomycota;saccharomyceta;Pezizomycotina;leotiomyceta;dothideomyceta;Dothideomycetes;Dothideomycetes incertae sedis;Coniosporium;Coniosporium apollinis;Coniosporium apollinis CBS 100218
UniRef100_A0A4U0X5G3	1	A0A4U0X5G3	Uncharacterized protein	724	5-701	6.8e-110	369.9	Cryomyces minteri	331657	cellular organisms;Eukaryota;Opisthokonta;Fungi;Dikarya;Ascomycota;saccharomyceta;Pezizomycotina;leotiomyceta;dothideomyceta;Dothideomycetes;Dothideomycetes incertae sedis;Cryomyces;Cryomyces minteri
UniRef100_Q5B7A2	2	Q5B7A2	CCCH zinc finger and SMR domain protein (AFU_orthologue AFUA_4G13020)	734	1-698	4.1e-102	344.2	Emericella nidulans (strain FGSC A4 / ATCC 38163 / CBS 112.46 / NRRL 194 / M139) (Aspergillus nidulans)	227321	cellular organisms;Eukaryota;Opisthokonta;Fungi;Dikarya;Ascomycota;saccharomyceta;Pezizomycotina;leotiomyceta;Eurotiomycetes;Eurotiomycetidae;Eurotiales;Aspergillaceae;Aspergillus;Aspergillus nidulans;Aspergillus nidulans FGSC A4
UniRef100_A0A1L9TDR7	1	A0A1L9TDR7	Uncharacterized protein	732	1-692	4.7e-101	340.7	Aspergillus sydowii CBS 593.65	1036612	cellular organisms;Eukaryota;Opisthokonta;Fungi;Dikarya;Ascomycota;saccharomyceta;Pezizomycotina;leotiomyceta;Eurotiomycetes;Eurotiomycetidae;Eurotiales;Aspergillaceae;Aspergillus;Aspergillus sydowii;Aspergillus sydowii CBS 593.65
UniRef100_A0A425BQ86	1	A0A425BQ86	Uncharacterized protein	740	6-694	1.5e-110	372.1	Scytalidium sp. 3C	2487125	cellular organisms;Eukaryota;Opisthokonta;Fungi;Dikarya;Ascomycota;saccharomyceta;Pezizomycotina;leotiomyceta;sordariomyceta;Leotiomycetes;Leotiomycetes incertae sedis;Scytalidium;Scytalidium sp. 3C
UniRef100_A0A3E2HFV5	1	A0A3E2HFV5	Uncharacterized protein (Fragment)	738	6-691	2.1e-108	365.0	Scytalidium lignicola (Hyphomycete)	5539	cellular organisms;Eukaryota;Opisthokonta;Fungi;Dikarya;Ascomycota;saccharomyceta;Pezizomycotina;leotiomyceta;sordariomyceta;Leotiomycetes;Leotiomycetes incertae sedis;Scytalidium;Scytalidium lignicola
UniRef100_A0A2S7QL36	1	A0A2S7QL36	Uncharacterized protein	738	2-688	4.8e-106	357.2	Rutstroemia sp. NJR-2017a WRK4	2070412	cellular organisms;Eukaryota;Opisthokonta;Fungi;Dikarya;Ascomycota;saccharomyceta;Pezizomycotina;leotiomyceta;sordariomyceta;Leotiomycetes;Helotiales;Rutstroemiaceae;Rutstroemia;Rutstroemia sp. NJR-2017a WRK4
UniRef100_A7EFX8	2	A7EFX8	Uncharacterized protein	737	3-699	4.8e-106	357.2	Sclerotinia sclerotiorum (strain ATCC 18683 / 1980 / Ss-1) (White mold) (Whetzelinia sclerotiorum)	665079	cellular organisms;Eukaryota;Opisthokonta;Fungi;Dikarya;Ascomycota;saccharomyceta;Pezizomycotina;leotiomyceta;sordariomyceta;Leotiomycetes;Helotiales;Sclerotiniaceae;Sclerotinia;Sclerotinia sclerotiorum;Sclerotinia sclerotiorum 1980 UF-70
UniRef100_W9BZY0	1	W9BZY0	Uncharacterized protein	737	3-691	3.2e-104	351.2	Sclerotinia borealis (strain F-4128)	1432307	cellular organisms;Eukaryota;Opisthokonta;Fungi;Dikarya;Ascomycota;saccharomyceta;Pezizomycotina;leotiomyceta;sordariomyceta;Leotiomycetes;Helotiales;Sclerotiniaceae;Sclerotinia;Sclerotinia borealis;Sclerotinia borealis F-4128
UniRef100_A0A5M9K5Z2	1	A0A5M9K5Z2	Uncharacterized protein	736	3-687	2.1e-104	351.8	Monilinia fructicola (Brown rot fungus) (Ciboria fructicola)	38448	cellular organisms;Eukaryota;Opisthokonta;Fungi;Dikarya;Ascomycota;saccharomyceta;Pezizomycotina;leotiomyceta;sordariomyceta;Leotiomycetes;Helotiales;Sclerotiniaceae;Monilinia;Monilinia fructicola
UniRef100_A0A4Z1F2I7	1	A0A4Z1F2I7	Uncharacterized protein	738	3-696	1.1e-102	346.1	Botrytis tulipae	87230	cellular organisms;Eukaryota;Opisthokonta;Fungi;Dikarya;Ascomycota;saccharomyceta;Pezizomycotina;leotiomyceta;sordariomyceta;Leotiomycetes;Helotiales;Sclerotiniaceae;Botrytis;Botrytis tulipae
UniRef100_A0A4Z1H603	1	A0A4Z1H603	Uncharacterized protein	738	3-694	1.6e-102	345.5	Botrytis hyacinthi	278943	cellular organisms;Eukaryota;Opisthokonta;Fungi;Dikarya;Ascomycota;saccharomyceta;Pezizomycotina;leotiomyceta;sordariomyceta;Leotiomycetes;Helotiales;Sclerotiniaceae;Botrytis;Botrytis hyacinthi
UniRef100_M7TT19	1	M7TT19	Putative ccch zinc finger and smr domain-containing protein	738	3-692	2.2e-102	345.1	Botryotinia fuckeliana (strain BcDW1) (Noble rot fungus) (Botrytis cinerea)	1290391	cellular organisms;Eukaryota;Opisthokonta;Fungi;Dikarya;Ascomycota;saccharomyceta;Pezizomycotina;leotiomyceta;sordariomyceta;Leotiomycetes;Helotiales;Sclerotiniaceae;Botrytis;Botrytis cinerea;Botrytis cinerea BcDW1
UniRef100_A0A384J6X8	2	A0A384J6X8	Uncharacterized protein	738	3-692	2.6e-102	344.9	Botryotinia fuckeliana (strain B05.10) (Noble rot fungus) (Botrytis cinerea)	40559	cellular organisms;Eukaryota;Opisthokonta;Fungi;Dikarya;Ascomycota;saccharomyceta;Pezizomycotina;leotiomyceta;sordariomyceta;Leotiomycetes;Helotiales;Sclerotiniaceae;Botrytis;Botrytis cinerea
UniRef100_A0A4Z1K6X0	1	A0A4Z1K6X0	Uncharacterized protein	738	3-696	2.3e-102	345.0	Botrytis elliptica	278938	cellular organisms;Eukaryota;Opisthokonta;Fungi;Dikarya;Ascomycota;saccharomyceta;Pezizomycotina;leotiomyceta;sordariomyceta;Leotiomycetes;Helotiales;Sclerotiniaceae;Botrytis;Botrytis elliptica
UniRef100_A0A4Z1KGA3	1	A0A4Z1KGA3	Uncharacterized protein	738	3-696	6.8e-102	343.5	Botrytis porri	87229	cellular organisms;Eukaryota;Opisthokonta;Fungi;Dikarya;Ascomycota;saccharomyceta;Pezizomycotina;leotiomyceta;sordariomyceta;Leotiomycetes;Helotiales;Sclerotiniaceae;Botrytis;Botrytis porri
UniRef100_A0A4Z1G789	1	A0A4Z1G789	Uncharacterized protein	738	3-696	3.6e-102	344.4	Botrytis paeoniae	278948	cellular organisms;Eukaryota;Opisthokonta;Fungi;Dikarya;Ascomycota;saccharomyceta;Pezizomycotina;leotiomyceta;sordariomyceta;Leotiomycetes;Helotiales;Sclerotiniaceae;Botrytis;Botrytis paeoniae
UniRef100_A0A4Z1JBX3	1	A0A4Z1JBX3	Uncharacterized protein	738	3-696	2.8e-102	344.7	Botryotinia narcissicola	278944	cellular organisms;Eukaryota;Opisthokonta;Fungi;Dikarya;Ascomycota;saccharomyceta;Pezizomycotina;leotiomyceta;sordariomyceta;Leotiomycetes;Helotiales;Sclerotiniaceae;Botryotinia;Botryotinia narcissicola
UniRef100_A0A4Z1IUL1	1	A0A4Z1IUL1	Uncharacterized protein	738	3-696	2.8e-102	344.7	Botryotinia convoluta	54673	cellular organisms;Eukaryota;Opisthokonta;Fungi;Dikarya;Ascomycota;saccharomyceta;Pezizomycotina;leotiomyceta;sordariomyceta;Leotiomycetes;Helotiales;Sclerotiniaceae;Botryotinia;Botryotinia convoluta
UniRef100_A0A4S8R5P1	1	A0A4S8R5P1	Uncharacterized protein	738	3-696	1.8e-102	345.4	Botrytis galanthina	278940	cellular organisms;Eukaryota;Opisthokonta;Fungi;Dikarya;Ascomycota;saccharomyceta;Pezizomycotina;leotiomyceta;sordariomyceta;Leotiomycetes;Helotiales;Sclerotiniaceae;Botrytis;Botrytis galanthina
UniRef100_A0A0C3CYU3	1	A0A0C3CYU3	Uncharacterized protein	738	3-696	1.8e-110	371.8	Oidiodendron maius Zn	913774	cellular organisms;Eukaryota;Opisthokonta;Fungi;Dikarya;Ascomycota;saccharomyceta;Pezizomycotina;leotiomyceta;sordariomyceta;Leotiomycetes;Leotiomycetes incertae sedis;Myxotrichaceae;Oidiodendron;Oidiodendron maius;Oidiodendron maius Zn
UniRef100_A0A2T3BF47	1	A0A2T3BF47	Uncharacterized protein	733	3-690	8.4e-110	369.6	Amorphotheca resinae ATCC 22711	857342	cellular organisms;Eukaryota;Opisthokonta;Fungi;Dikarya;Ascomycota;saccharomyceta;Pezizomycotina;leotiomyceta;sordariomyceta;Leotiomycetes;Leotiomycetes incertae sedis;Myxotrichaceae;Amorphotheca;Amorphotheca resinae;Amorphotheca resinae ATCC 22711
UniRef100_A0A2J6RNB8	1	A0A2J6RNB8	Uncharacterized protein	746	1-704	2.9e-109	367.8	Hyaloscypha variabilis F	1149755	cellular organisms;Eukaryota;Opisthokonta;Fungi;Dikarya;Ascomycota;saccharomyceta;Pezizomycotina;leotiomyceta;sordariomyceta;Leotiomycetes;Helotiales;Hyaloscyphaceae;Hyaloscypha;Hyaloscypha variabilis;Hyaloscypha variabilis F
UniRef100_A0A2J6QFK3	1	A0A2J6QFK3	Uncharacterized protein	748	1-705	1.2e-107	362.5	Pezoloma ericae	1745343	cellular organisms;Eukaryota;Opisthokonta;Fungi;Dikarya;Ascomycota;saccharomyceta;Pezizomycotina;leotiomyceta;sordariomyceta;Leotiomycetes;Helotiales;Leotiaceae;Pezoloma;Pezoloma ericae species complex;Pezoloma ericae
UniRef100_A0A2J6SM99	1	A0A2J6SM99	Uncharacterized protein	746	1-706	1e-106	359.4	Hyaloscypha bicolor E	1095630	cellular organisms;Eukaryota;Opisthokonta;Fungi;Dikarya;Ascomycota;saccharomyceta;Pezizomycotina;leotiomyceta;sordariomyceta;Leotiomycetes;Helotiales;Hyaloscyphaceae;Hyaloscypha;Hyaloscypha bicolor;Meliniomyces bicolor E
UniRef100_A0A559MC71	1	A0A559MC71	Polyadenylate-binding protein-interacting protein	731	10-691	4e-108	364.1	Lachnellula willkommii	215461	cellular organisms;Eukaryota;Opisthokonta;Fungi;Dikarya;Ascomycota;saccharomyceta;Pezizomycotina;leotiomyceta;sordariomyceta;Leotiomycetes;Helotiales;Lachnaceae;Lachnellula;Lachnellula willkommii
UniRef100_UPI001249C17B	1	UPI001249C17B	Polyadenylate-binding protein-interacting protein	734	10-688	3.2e-105	354.5	Lachnellula hyalina	1316788	cellular organisms;Eukaryota;Opisthokonta;Fungi;Dikarya;Ascomycota;saccharomyceta;Pezizomycotina;leotiomyceta;sordariomyceta;Leotiomycetes;Helotiales;Lachnaceae;Lachnellula;Lachnellula hyalina
UniRef100_S3CSF5	1	S3CSF5	CCCH zinc finger	737	3-694	6.8e-102	343.5	Glarea lozoyensis (strain ATCC 20868 / MF5171)	1116229	cellular organisms;Eukaryota;Opisthokonta;Fungi;Dikarya;Ascomycota;saccharomyceta;Pezizomycotina;leotiomyceta;sordariomyceta;Leotiomycetes;Helotiales;Helotiaceae;Glarea;Glarea lozoyensis;Glarea lozoyensis ATCC 20868
UniRef100_A0A370TMV9	1	A0A370TMV9	CCCH zinc finger	747	5-699	7.2e-106	356.6	Venustampulla echinocandica	2656787	cellular organisms;Eukaryota;Opisthokonta;Fungi;Dikarya;Ascomycota;saccharomyceta;Pezizomycotina;leotiomyceta;sordariomyceta;Leotiomycetes;Helotiales;Pleuroascaceae;Venustampulla
UniRef100_A0A1L7WDS6	1	A0A1L7WDS6	Related to nuclear WD protein PRL1	744	1-695	5.5e-108	363.6	Phialocephala subalpina	576137	cellular organisms;Eukaryota;Opisthokonta;Fungi;Dikarya;Ascomycota;saccharomyceta;Pezizomycotina;leotiomyceta;sordariomyceta;Leotiomycetes;Helotiales;Helotiales incertae sedis;Phialocephala;Phialocephala fortinii species complex;Phialocephala subalpina
UniRef100_A0A194XRB0	1	A0A194XRB0	Uncharacterized protein	746	1-697	1.2e-107	362.5	Phialocephala scopiformis	149040	cellular organisms;Eukaryota;Opisthokonta;Fungi;Dikarya;Ascomycota;saccharomyceta;Pezizomycotina;leotiomyceta;sordariomyceta;Leotiomycetes;Helotiales;Helotiales incertae sedis;Phialocephala;Phialocephala scopiformis
UniRef100_A0A1E1KTW0	1	A0A1E1KTW0	Related to nuclear WD protein PRL1	744	10-696	7.2e-106	356.6	Rhynchosporium commune	914237	cellular organisms;Eukaryota;Opisthokonta;Fungi;Dikarya;Ascomycota;saccharomyceta;Pezizomycotina;leotiomyceta;sordariomyceta;Leotiomycetes;Helotiales;Helotiales incertae sedis;Rhynchosporium;Rhynchosporium commune
UniRef100_A0A1E1K8Y4	1	A0A1E1K8Y4	Related to nuclear WD protein PRL1	730	10-682	4.5e-103	347.4	Rhynchosporium agropyri	914238	cellular organisms;Eukaryota;Opisthokonta;Fungi;Dikarya;Ascomycota;saccharomyceta;Pezizomycotina;leotiomyceta;sordariomyceta;Leotiomycetes;Helotiales;Helotiales incertae sedis;Rhynchosporium;Rhynchosporium agropyri
UniRef100_A0A1E1M0V6	1	A0A1E1M0V6	Related to nuclear WD protein PRL1	744	10-696	1.4e-105	355.6	Rhynchosporium secalis (Barley scald fungus)	38038	cellular organisms;Eukaryota;Opisthokonta;Fungi;Dikarya;Ascomycota;saccharomyceta;Pezizomycotina;leotiomyceta;sordariomyceta;Leotiomycetes;Helotiales;Helotiales incertae sedis;Rhynchosporium;Rhynchosporium secalis
UniRef100_A0A2V1CT62	1	A0A2V1CT62	CCCH zinc finger and SMR domain-containing protein	748	10-698	1.4e-104	352.4	Cadophora sp. DSE1049	1485229	cellular organisms;Eukaryota;Opisthokonta;Fungi;Dikarya;Ascomycota;saccharomyceta;Pezizomycotina;leotiomyceta;sordariomyceta;Leotiomycetes;Helotiales;Helotiales incertae sedis;Cadophora;Cadophora sp. DSE1049
UniRef100_A0A3D8R109	1	A0A3D8R109	Uncharacterized protein	733	10-690	1.4e-106	359.0	Coleophoma cylindrospora	1849047	cellular organisms;Eukaryota;Opisthokonta;Fungi;Dikarya;Ascomycota;saccharomyceta;Pezizomycotina;leotiomyceta;sordariomyceta;Leotiomycetes;Helotiales;Helotiales incertae sedis;Coleophoma;Coleophoma cylindrospora
UniRef100_A0A3D8RJ98	1	A0A3D8RJ98	Uncharacterized protein	733	10-690	1.4e-106	359.0	Coleophoma crateriformis	565419	cellular organisms;Eukaryota;Opisthokonta;Fungi;Dikarya;Ascomycota;saccharomyceta;Pezizomycotina;leotiomyceta;sordariomyceta;Leotiomycetes;Helotiales;Helotiales incertae sedis;Coleophoma;Coleophoma crateriformis
UniRef100_G2PZV7	1	G2PZV7	Uncharacterized protein	732	1-729	2.3e-109	368.2	Myceliophthora thermophila (strain ATCC 42464 / BCRC 31852 / DSM 1799) (Sporotrichum thermophile)	573729	cellular organisms;Eukaryota;Opisthokonta;Fungi;Dikarya;Ascomycota;saccharomyceta;Pezizomycotina;leotiomyceta;sordariomyceta;Sordariomycetes;Sordariomycetidae;Sordariales;Chaetomiaceae;Thermothelomyces;Thermothelomyces thermophilus;Thermothelomyces thermophilus ATCC 42464
UniRef100_A0A175VS29	1	A0A175VS29	Polyadenylate-binding protein-interacting protein 7	734	1-679	4.3e-105	354.0	Madurella mycetomatis	100816	cellular organisms;Eukaryota;Opisthokonta;Fungi;Dikarya;Ascomycota;saccharomyceta;Pezizomycotina;leotiomyceta;sordariomyceta;Sordariomycetes;Sordariomycetidae;Sordariales;Sordariales incertae sedis;Madurella;Madurella mycetomatis
UniRef100_F8N1I7	1	F8N1I7	Uncharacterized protein	747	1-729	1.7e-106	358.7	Neurospora tetrasperma (strain FGSC 2508 / ATCC MYA-4615 / P0657)	510951	cellular organisms;Eukaryota;Opisthokonta;Fungi;Dikarya;Ascomycota;saccharomyceta;Pezizomycotina;leotiomyceta;sordariomyceta;Sordariomycetes;Sordariomycetidae;Sordariales;Sordariaceae;Neurospora;Neurospora tetrasperma;Neurospora tetrasperma FGSC 2508
UniRef100_G4UBX2	1	G4UBX2	Uncharacterized protein	747	1-704	1.3e-105	355.7	Neurospora tetrasperma (strain FGSC 2509 / P0656)	510952	cellular organisms;Eukaryota;Opisthokonta;Fungi;Dikarya;Ascomycota;saccharomyceta;Pezizomycotina;leotiomyceta;sordariomyceta;Sordariomycetes;Sordariomycetidae;Sordariales;Sordariaceae;Neurospora;Neurospora tetrasperma;Neurospora tetrasperma FGSC 2509
UniRef100_F7VKX5	1	F7VKX5	WGS project CABT00000000 data contig 2.1	748	1-697	2.4e-105	354.9	Sordaria macrospora (strain ATCC MYA-333 / DSM 997 / K(L3346) / K-hell)	771870	cellular organisms;Eukaryota;Opisthokonta;Fungi;Dikarya;Ascomycota;saccharomyceta;Pezizomycotina;leotiomyceta;sordariomyceta;Sordariomycetes;Sordariomycetidae;Sordariales;Sordariaceae;Sordaria;Sordaria macrospora;Sordaria macrospora k-hell
UniRef100_Q7S1F5	2	Q7S1F5	CCCH zinc finger and SMR domain-containing protein	747	1-729	9.1e-106	356.3	Neurospora crassa (strain ATCC 24698 / 74-OR23-1A / CBS 708.71 / DSM 1257 / FGSC 987)	5141	cellular organisms;Eukaryota;Opisthokonta;Fungi;Dikarya;Ascomycota;saccharomyceta;Pezizomycotina;leotiomyceta;sordariomyceta;Sordariomycetes;Sordariomycetidae;Sordariales;Sordariaceae;Neurospora;Neurospora crassa
UniRef100_A0A1Y2XBH0	1	A0A1Y2XBH0	Uncharacterized protein	730	6-693	6e-101	340.3	Daldinia sp. EC12	1001832	cellular organisms;Eukaryota;Opisthokonta;Fungi;Dikarya;Ascomycota;saccharomyceta;Pezizomycotina;leotiomyceta;sordariomyceta;Sordariomycetes;Xylariomycetidae;Xylariales;Hypoxylaceae;Daldinia;Daldinia sp. EC12
UniRef100_C7YQD6	1	C7YQD6	Predicted protein	730	8-697	4.2e-106	357.4	Nectria haematococca (strain 77-13-4 / ATCC MYA-4622 / FGSC 9596 / MPVI) (Fusarium solani subsp. pisi)	660122	cellular organisms;Eukaryota;Opisthokonta;Fungi;Dikarya;Ascomycota;saccharomyceta;Pezizomycotina;leotiomyceta;sordariomyceta;Sordariomycetes;Hypocreomycetidae;Hypocreales;Nectriaceae;Fusarium;Fusarium solani species complex;[Nectria] haematococca;[Nectria] haematococca mpVI;[Nectria] haematococca mpVI 77-13-4
UniRef100_A0A428QJC3	1	A0A428QJC3	Uncharacterized protein	732	8-697	2.3e-104	351.7	Fusarium sp. AF-8	1325734	cellular organisms;Eukaryota;Opisthokonta;Fungi;Dikarya;Ascomycota;saccharomyceta;Pezizomycotina;leotiomyceta;sordariomyceta;Sordariomycetes;Hypocreomycetidae;Hypocreales;Nectriaceae;Fusarium;Fusarium solani species complex;Fusarium sp. AF-8
UniRef100_A0A430LVM3	3	A0A430LVM3	Uncharacterized protein	732	8-697	7.2e-105	353.3	Fusarium euwallaceae	232080	cellular organisms;Eukaryota;Opisthokonta;Fungi;Dikarya;Ascomycota;saccharomyceta;Pezizomycotina;leotiomyceta;sordariomyceta;Sordariomycetes;Hypocreomycetidae;Hypocreales;Nectriaceae;Fusarium;Fusarium solani species complex
UniRef100_A0A3M2S144	1	A0A3M2S144	Uncharacterized protein	732	8-696	9.6e-105	352.9	Fusarium kuroshium	2010991	cellular organisms;Eukaryota;Opisthokonta;Fungi;Dikarya;Ascomycota;saccharomyceta;Pezizomycotina;leotiomyceta;sordariomyceta;Sordariomycetes;Hypocreomycetidae;Hypocreales;Nectriaceae;Fusarium;Fusarium solani species complex;Fusarium kuroshium
UniRef100_A0A428S3X9	1	A0A428S3X9	Uncharacterized protein	732	8-697	8.4e-105	353.1	Fusarium sp. AF-3	1325733	cellular organisms;Eukaryota;Opisthokonta;Fungi;Dikarya;Ascomycota;saccharomyceta;Pezizomycotina;leotiomyceta;sordariomyceta;Sordariomycetes;Hypocreomycetidae;Hypocreales;Nectriaceae;Fusarium;Fusarium solani species complex;Fusarium sp. AF-3
UniRef100_A0A395MFK5	1	A0A395MFK5	Nuclear wd protein prl1	723	10-680	1.2e-102	345.9	Fusarium fasciculatum	2594813	cellular organisms;Eukaryota;Opisthokonta;Fungi;Dikarya;Ascomycota;saccharomyceta;Pezizomycotina;leotiomyceta;sordariomyceta;Sordariomycetes;Hypocreomycetidae;Hypocreales;Nectriaceae;Fusarium;Fusarium incarnatum-equiseti species complex
UniRef100_A0A366RMJ1	1	A0A366RMJ1	Uncharacterized protein	723	10-680	3.5e-102	344.4	Fusarium coffeatum	231269	cellular organisms;Eukaryota;Opisthokonta;Fungi;Dikarya;Ascomycota;saccharomyceta;Pezizomycotina;leotiomyceta;sordariomyceta;Sordariomycetes;Hypocreomycetidae;Hypocreales;Nectriaceae;Fusarium;Fusarium incarnatum-equiseti species complex;Fusarium coffeatum
UniRef100_A0A0M9F5M5	1	A0A0M9F5M5	Ccch zinc finger and smr containing protein	723	10-685	1.7e-102	345.4	Fusarium langsethiae	179993	cellular organisms;Eukaryota;Opisthokonta;Fungi;Dikarya;Ascomycota;saccharomyceta;Pezizomycotina;leotiomyceta;sordariomyceta;Sordariomycetes;Hypocreomycetidae;Hypocreales;Nectriaceae;Fusarium;Fusarium sambucinum species complex;Fusarium langsethiae
UniRef100_A0A395RPJ3	1	A0A395RPJ3	Uncharacterized protein	723	10-685	5.3e-102	343.8	Fusarium sporotrichioides	5514	cellular organisms;Eukaryota;Opisthokonta;Fungi;Dikarya;Ascomycota;saccharomyceta;Pezizomycotina;leotiomyceta;sordariomyceta;Sordariomycetes;Hypocreomycetidae;Hypocreales;Nectriaceae;Fusarium;Fusarium sambucinum species complex;Fusarium sporotrichioides
UniRef100_A0A098DP43	2	A0A098DP43	Uncharacterized protein	723	10-685	3.6e-102	344.4	Gibberella zeae (strain PH-1 / ATCC MYA-4620 / FGSC 9075 / NRRL 31084) (Wheat head blight fungus) (Fusarium graminearum)	5518	cellular organisms;Eukaryota;Opisthokonta;Fungi;Dikarya;Ascomycota;saccharomyceta;Pezizomycotina;leotiomyceta;sordariomyceta;Sordariomycetes;Hypocreomycetidae;Hypocreales;Nectriaceae;Fusarium;Fusarium sambucinum species complex;Fusarium graminearum
UniRef100_A0A2T4H010	1	A0A2T4H010	Golgi apparatus membrane protein tvp38	1126	10-686	1.4e-101	342.4	Fusarium culmorum	5516	cellular organisms;Eukaryota;Opisthokonta;Fungi;Dikarya;Ascomycota;saccharomyceta;Pezizomycotina;leotiomyceta;sordariomyceta;Sordariomycetes;Hypocreomycetidae;Hypocreales;Nectriaceae;Fusarium;Fusarium sambucinum species complex;Fusarium culmorum
UniRef100_K3U9Q4	1	K3U9Q4	Uncharacterized protein	723	10-685	4.9e-102	343.9	Fusarium pseudograminearum (strain CS3096) (Wheat and barley crown-rot fungus)	1028729	cellular organisms;Eukaryota;Opisthokonta;Fungi;Dikarya;Ascomycota;saccharomyceta;Pezizomycotina;leotiomyceta;sordariomyceta;Sordariomycetes;Hypocreomycetidae;Hypocreales;Nectriaceae;Fusarium;Fusarium sambucinum species complex;Fusarium pseudograminearum;Fusarium pseudograminearum CS3096
UniRef100_A0A1B8AC74	1	A0A1B8AC74	Uncharacterized protein	806	89-763	5.8e-101	340.4	Fusarium poae	36050	cellular organisms;Eukaryota;Opisthokonta;Fungi;Dikarya;Ascomycota;saccharomyceta;Pezizomycotina;leotiomyceta;sordariomyceta;Sordariomycetes;Hypocreomycetidae;Hypocreales;Nectriaceae;Fusarium;Fusarium sambucinum species complex;Fusarium poae
UniRef100_A0A2L2SPY9	1	A0A2L2SPY9	Uncharacterized protein	723	10-680	4.7e-102	344.0	Fusarium venenatum	56646	cellular organisms;Eukaryota;Opisthokonta;Fungi;Dikarya;Ascomycota;saccharomyceta;Pezizomycotina;leotiomyceta;sordariomyceta;Sordariomycetes;Hypocreomycetidae;Hypocreales;Nectriaceae;Fusarium;Fusarium sambucinum species complex;Fusarium venenatum
UniRef100_X0J2B3	2	X0J2B3	Uncharacterized protein	723	10-686	8.9e-101	339.8	Fusarium oxysporum f. sp. cubense tropical race 4 54006	61366	cellular organisms;Eukaryota;Opisthokonta;Fungi;Dikarya;Ascomycota;saccharomyceta;Pezizomycotina;leotiomyceta;sordariomyceta;Sordariomycetes;Hypocreomycetidae;Hypocreales;Nectriaceae;Fusarium;Fusarium oxysporum species complex;Fusarium oxysporum;Fusarium oxysporum f. sp. cubense
UniRef100_E9F0A7	2	E9F0A7	Smr domain-containing protein	728	10-693	9.5e-104	349.6	Metarhizium robertsii (strain ARSEF 23 / ATCC MYA-3075) (Metarhizium anisopliae (strain ARSEF 23))	568076	cellular organisms;Eukaryota;Opisthokonta;Fungi;Dikarya;Ascomycota;saccharomyceta;Pezizomycotina;leotiomyceta;sordariomyceta;Sordariomycetes;Hypocreomycetidae;Hypocreales;Clavicipitaceae;Metarhizium;Metarhizium robertsii
UniRef100_A0A0B4FDS3	1	A0A0B4FDS3	CCCH zinc finger and SMR domain containing protein (Fragment)	729	10-687	7.1e-104	350.0	Metarhizium anisopliae (strain ARSEF 549)	1276135	cellular organisms;Eukaryota;Opisthokonta;Fungi;Dikarya;Ascomycota;saccharomyceta;Pezizomycotina;leotiomyceta;sordariomyceta;Sordariomycetes;Hypocreomycetidae;Hypocreales;Clavicipitaceae;Metarhizium;Metarhizium anisopliae;Metarhizium anisopliae ARSEF 549
UniRef100_A0A0D9PDS7	1	A0A0D9PDS7	Uncharacterized protein	729	10-687	7.3e-103	346.7	Metarhizium anisopliae BRIP 53293	1291518	cellular organisms;Eukaryota;Opisthokonta;Fungi;Dikarya;Ascomycota;saccharomyceta;Pezizomycotina;leotiomyceta;sordariomyceta;Sordariomycetes;Hypocreomycetidae;Hypocreales;Clavicipitaceae;Metarhizium;Metarhizium anisopliae;Metarhizium anisopliae BRIP 53293
UniRef100_A0A0B4GKB2	1	A0A0B4GKB2	CCCH zinc finger and SMR domain containing protein (Fragment)	728	10-693	1.7e-102	345.4	Metarhizium brunneum (strain ARSEF 3297)	1276141	cellular organisms;Eukaryota;Opisthokonta;Fungi;Dikarya;Ascomycota;saccharomyceta;Pezizomycotina;leotiomyceta;sordariomyceta;Sordariomycetes;Hypocreomycetidae;Hypocreales;Clavicipitaceae;Metarhizium;Metarhizium brunneum;Metarhizium brunneum ARSEF 3297
UniRef100_A0A0B4I4A0	1	A0A0B4I4A0	CCCH zinc finger and SMR domain containing protein (Fragment)	722	10-688	1.9e-103	348.6	Metarhizium majus (strain ARSEF 297)	1276143	cellular organisms;Eukaryota;Opisthokonta;Fungi;Dikarya;Ascomycota;saccharomyceta;Pezizomycotina;leotiomyceta;sordariomyceta;Sordariomycetes;Hypocreomycetidae;Hypocreales;Clavicipitaceae;Metarhizium;Metarhizium majus;Metarhizium majus ARSEF 297
UniRef100_A0A0B4GUH7	1	A0A0B4GUH7	CCCH zinc finger and SMR domain containing protein	728	10-692	1.9e-103	348.6	Metarhizium guizhouense (strain ARSEF 977)	1276136	cellular organisms;Eukaryota;Opisthokonta;Fungi;Dikarya;Ascomycota;saccharomyceta;Pezizomycotina;leotiomyceta;sordariomyceta;Sordariomycetes;Hypocreomycetidae;Hypocreales;Clavicipitaceae;Metarhizium;Metarhizium guizhouense;Metarhizium guizhouense ARSEF 977
UniRef100_E9DTS8	1	E9DTS8	CCCH zinc finger and SMR domain containing protein	729	10-698	6.4e-103	346.9	Metarhizium acridum (strain CQMa 102)	655827	cellular organisms;Eukaryota;Opisthokonta;Fungi;Dikarya;Ascomycota;saccharomyceta;Pezizomycotina;leotiomyceta;sordariomyceta;Sordariomycetes;Hypocreomycetidae;Hypocreales;Clavicipitaceae;Metarhizium;Metarhizium acridum;Metarhizium acridum CQMa 102
UniRef100_A0A5C6GJM7	1	A0A5C6GJM7	Uncharacterized protein	727	10-725	3.3e-103	347.8	Metarhizium rileyi	1649241	cellular organisms;Eukaryota;Opisthokonta;Fungi;Dikarya;Ascomycota;saccharomyceta;Pezizomycotina;leotiomyceta;sordariomyceta;Sordariomycetes;Hypocreomycetidae;Hypocreales;Clavicipitaceae;Metarhizium;Metarhizium rileyi
UniRef100_A0A167E2K1	1	A0A167E2K1	CCCH zinc finger and SMR domain containing protein	727	10-725	1.5e-102	345.6	Metarhizium rileyi RCEF 4871	1081105	cellular organisms;Eukaryota;Opisthokonta;Fungi;Dikarya;Ascomycota;saccharomyceta;Pezizomycotina;leotiomyceta;sordariomyceta;Sordariomycetes;Hypocreomycetidae;Hypocreales;Clavicipitaceae;Metarhizium;Metarhizium rileyi;Metarhizium rileyi RCEF 4871
UniRef100_A0A179FY57	2	A0A179FY57	CCCH zinc finger and SMR domain-containing protein	728	10-691	3.8e-102	344.3	Pochonia chlamydosporia 170	280754	cellular organisms;Eukaryota;Opisthokonta;Fungi;Dikarya;Ascomycota;saccharomyceta;Pezizomycotina;leotiomyceta;sordariomyceta;Sordariomycetes;Hypocreomycetidae;Hypocreales;Clavicipitaceae;Pochonia;Pochonia chlamydosporia
UniRef100_A0A2S4KPD5	1	A0A2S4KPD5	Polyadenylate-binding protein-interacting protein 7	730	10-692	5.4e-102	343.8	Tolypocladium paradoxum	94208	cellular organisms;Eukaryota;Opisthokonta;Fungi;Dikarya;Ascomycota;saccharomyceta;Pezizomycotina;leotiomyceta;sordariomyceta;Sordariomycetes;Hypocreomycetidae;Hypocreales;Ophiocordycipitaceae;Tolypocladium;Tolypocladium paradoxum
UniRef100_A0A2K3QM98	1	A0A2K3QM98	Polyadenylate-binding protein-interacting protein 7	736	10-704	7.9e-101	339.9	Tolypocladium capitatum	45235	cellular organisms;Eukaryota;Opisthokonta;Fungi;Dikarya;Ascomycota;saccharomyceta;Pezizomycotina;leotiomyceta;sordariomyceta;Sordariomycetes;Hypocreomycetidae;Hypocreales;Ophiocordycipitaceae;Tolypocladium;Tolypocladium capitatum
UniRef100_A0A0L0NLF3	1	A0A0L0NLF3	Polyadenylate-binding protein-interacting protein 7	730	10-712	5.4e-101	340.5	Tolypocladium ophioglossoides CBS 100239	1163406	cellular organisms;Eukaryota;Opisthokonta;Fungi;Dikarya;Ascomycota;saccharomyceta;Pezizomycotina;leotiomyceta;sordariomyceta;Sordariomycetes;Hypocreomycetidae;Hypocreales;Ophiocordycipitaceae;Tolypocladium;Tolypocladium ophioglossoides;Tolypocladium ophioglossoides CBS 100239
UniRef100_A0A0B7JJR2	1	A0A0B7JJR2	Uncharacterized protein	730	10-684	7e-106	356.7	Bionectria ochroleuca (Gliocladium roseum)	29856	cellular organisms;Eukaryota;Opisthokonta;Fungi;Dikarya;Ascomycota;saccharomyceta;Pezizomycotina;leotiomyceta;sordariomyceta;Sordariomycetes;Hypocreomycetidae;Hypocreales;Bionectriaceae;Clonostachys;Clonostachys rosea
UniRef100_A0A084QBX0	1	A0A084QBX0	Uncharacterized protein	1235	10-867	5.2e-104	350.5	Stachybotrys chlorohalonata (strain IBT 40285)	1283841	cellular organisms;Eukaryota;Opisthokonta;Fungi;Dikarya;Ascomycota;saccharomyceta;Pezizomycotina;leotiomyceta;sordariomyceta;Sordariomycetes;Hypocreomycetidae;Hypocreales;Stachybotryaceae;Stachybotrys;Stachybotrys chlorohalonata;Stachybotrys chlorohalonata IBT 40285
UniRef100_A0A086TF60	1	A0A086TF60	Polyadenylate-binding protein-interacting protein-like protein	726	10-702	3.1e-102	344.6	Acremonium chrysogenum (strain ATCC 11550 / CBS 779.69 / DSM 880 / JCM 23072 / IMI 49137)	857340	cellular organisms;Eukaryota;Opisthokonta;Fungi;Dikarya;Ascomycota;saccharomyceta;Pezizomycotina;leotiomyceta;sordariomyceta;Sordariomycetes;Hypocreomycetidae;Hypocreales;Hypocreales incertae sedis;Acremonium;Acremonium chrysogenum;Acremonium chrysogenum ATCC 11550
UniRef100_A0A3N2PS84	1	A0A3N2PS84	Uncharacterized protein	1283	10-697	1e-103	349.5	Sodiomyces alkalinus F11	1314773	cellular organisms;Eukaryota;Opisthokonta;Fungi;Dikarya;Ascomycota;saccharomyceta;Pezizomycotina;leotiomyceta;sordariomyceta;Sordariomycetes;Hypocreomycetidae;Glomerellales;Plectosphaerellaceae;Sodiomyces;Sodiomyces alkalinus;Sodiomyces alkalinus F11
UniRef100_A0A2R9ABP8	1	A0A2R9ABP8	Zinc finger CCCH-type containing 6	1178	1-1109	8e-208	693.9	Pan paniscus (Pygmy chimpanzee) (Bonobo)	9597	cellular organisms;Eukaryota;Opisthokonta;Metazoa;Eumetazoa;Bilateria;Deuterostomia;Chordata;Craniata;Vertebrata;Gnathostomata;Teleostomi;Euteleostomi;Sarcopterygii;Dipnotetrapodomorpha;Tetrapoda;Amniota;Mammalia;Theria;Eutheria;Boreoeutheria;Euarchontoglires;Primates;Haplorrhini;Simiiformes;Catarrhini;Hominoidea;Hominidae;Homininae;Pan;Pan paniscus
UniRef100_H2QIJ9	1	H2QIJ9	ZC3H6 isoform 1	1189	5-1120	1.8e-207	692.8	Pan troglodytes (Chimpanzee)	9598	cellular organisms;Eukaryota;Opisthokonta;Metazoa;Eumetazoa;Bilateria;Deuterostomia;Chordata;Craniata;Vertebrata;Gnathostomata;Teleostomi;Euteleostomi;Sarcopterygii;Dipnotetrapodomorpha;Tetrapoda;Amniota;Mammalia;Theria;Eutheria;Boreoeutheria;Euarchontoglires;Primates;Haplorrhini;Simiiformes;Catarrhini;Hominoidea;Hominidae;Homininae;Pan;Pan troglodytes
UniRef100_K7C0N3	1	K7C0N3	Zinc finger CCCH-type containing 6	1189	5-1120	3.9e-207	691.6	Pan troglodytes (Chimpanzee)	9598	cellular organisms;Eukaryota;Opisthokonta;Metazoa;Eumetazoa;Bilateria;Deuterostomia;Chordata;Craniata;Vertebrata;Gnathostomata;Teleostomi;Euteleostomi;Sarcopterygii;Dipnotetrapodomorpha;Tetrapoda;Amniota;Mammalia;Theria;Eutheria;Boreoeutheria;Euarchontoglires;Primates;Haplorrhini;Simiiformes;Catarrhini;Hominoidea;Hominidae;Homininae;Pan;Pan troglodytes
UniRef100_UPI00123E5DA0	1	UPI00123E5DA0	zinc finger CCCH domain-containing protein 6	1189	5-1114	1.3e-207	693.3	Gorilla gorilla gorilla (Western lowland gorilla)	9595	cellular organisms;Eukaryota;Opisthokonta;Metazoa;Eumetazoa;Bilateria;Deuterostomia;Chordata;Craniata;Vertebrata;Gnathostomata;Teleostomi;Euteleostomi;Sarcopterygii;Dipnotetrapodomorpha;Tetrapoda;Amniota;Mammalia;Theria;Eutheria;Boreoeutheria;Euarchontoglires;Primates;Haplorrhini;Simiiformes;Catarrhini;Hominoidea;Hominidae;Homininae;Gorilla;Gorilla gorilla;Gorilla gorilla gorilla
UniRef100_G3SEF8	1	G3SEF8	Zinc finger CCCH-type containing 6	1189	5-1114	1.3e-207	693.3	Gorilla gorilla gorilla (Western lowland gorilla)	9595	cellular organisms;Eukaryota;Opisthokonta;Metazoa;Eumetazoa;Bilateria;Deuterostomia;Chordata;Craniata;Vertebrata;Gnathostomata;Teleostomi;Euteleostomi;Sarcopterygii;Dipnotetrapodomorpha;Tetrapoda;Amniota;Mammalia;Theria;Eutheria;Boreoeutheria;Euarchontoglires;Primates;Haplorrhini;Simiiformes;Catarrhini;Hominoidea;Hominidae;Homininae;Gorilla;Gorilla gorilla;Gorilla gorilla gorilla
UniRef100_UPI0006C97A6A	1	UPI0006C97A6A	LOW QUALITY PROTEIN: zinc finger CCCH domain-containing protein 6	1167	16-1098	7.7e-195	651.0	Pan paniscus (Pygmy chimpanzee) (Bonobo)	9597	cellular organisms;Eukaryota;Opisthokonta;Metazoa;Eumetazoa;Bilateria;Deuterostomia;Chordata;Craniata;Vertebrata;Gnathostomata;Teleostomi;Euteleostomi;Sarcopterygii;Dipnotetrapodomorpha;Tetrapoda;Amniota;Mammalia;Theria;Eutheria;Boreoeutheria;Euarchontoglires;Primates;Haplorrhini;Simiiformes;Catarrhini;Hominoidea;Hominidae;Homininae;Pan;Pan paniscus
UniRef100_UPI0005F3FB41	1	UPI0005F3FB41	LOW QUALITY PROTEIN: zinc finger CCCH domain-containing protein 6	1114	17-1091	8.1e-191	637.7	Colobus angolensis palliatus (Peters' Angolan colobus)	336983	cellular organisms;Eukaryota;Opisthokonta;Metazoa;Eumetazoa;Bilateria;Deuterostomia;Chordata;Craniata;Vertebrata;Gnathostomata;Teleostomi;Euteleostomi;Sarcopterygii;Dipnotetrapodomorpha;Tetrapoda;Amniota;Mammalia;Theria;Eutheria;Boreoeutheria;Euarchontoglires;Primates;Haplorrhini;Simiiformes;Catarrhini;Cercopithecoidea;Cercopithecidae;Colobinae;Colobus;Colobus angolensis;Colobus angolensis pallia…
UniRef100_Q6ZN12	1	Q6ZN12	cDNA FLJ16526 fis clone OCBBF2006987	892	16-891	9.9e-167	558.0	Homo sapiens (Human)	9606	cellular organisms;Eukaryota;Opisthokonta;Metazoa;Eumetazoa;Bilateria;Deuterostomia;Chordata;Craniata;Vertebrata;Gnathostomata;Teleostomi;Euteleostomi;Sarcopterygii;Dipnotetrapodomorpha;Tetrapoda;Amniota;Mammalia;Theria;Eutheria;Boreoeutheria;Euarchontoglires;Primates;Haplorrhini;Simiiformes;Catarrhini;Hominoidea;Hominidae;Homininae;Homo;Homo sapiens
UniRef100_UPI0003EAE95C	1	UPI0003EAE95C	zinc finger CCCH domain-containing protein 6 isoform X1	1124	5-1110	4.2e-207	691.5	Homo sapiens (Human)	9606	cellular organisms;Eukaryota;Opisthokonta;Metazoa;Eumetazoa;Bilateria;Deuterostomia;Chordata;Craniata;Vertebrata;Gnathostomata;Teleostomi;Euteleostomi;Sarcopterygii;Dipnotetrapodomorpha;Tetrapoda;Amniota;Mammalia;Theria;Eutheria;Boreoeutheria;Euarchontoglires;Primates;Haplorrhini;Simiiformes;Catarrhini;Hominoidea;Hominidae;Homininae;Homo;Homo sapiens
UniRef100_P61129	1	P61129	Zinc finger CCCH domain-containing protein 6	1189	5-1113	9.2e-207	690.4	Homo sapiens (Human)	9606	cellular organisms;Eukaryota;Opisthokonta;Metazoa;Eumetazoa;Bilateria;Deuterostomia;Chordata;Craniata;Vertebrata;Gnathostomata;Teleostomi;Euteleostomi;Sarcopterygii;Dipnotetrapodomorpha;Tetrapoda;Amniota;Mammalia;Theria;Eutheria;Boreoeutheria;Euarchontoglires;Primates;Haplorrhini;Simiiformes;Catarrhini;Hominoidea;Hominidae;Homininae;Homo;Homo sapiens
UniRef100_A0A2J8SGY6	1	A0A2J8SGY6	ZC3H6 isoform 1	1188	5-1113	2.1e-207	692.5	Pongo abelii (Sumatran orangutan) (Pongo pygmaeus abelii)	9601	cellular organisms;Eukaryota;Opisthokonta;Metazoa;Eumetazoa;Bilateria;Deuterostomia;Chordata;Craniata;Vertebrata;Gnathostomata;Teleostomi;Euteleostomi;Sarcopterygii;Dipnotetrapodomorpha;Tetrapoda;Amniota;Mammalia;Theria;Eutheria;Boreoeutheria;Euarchontoglires;Primates;Haplorrhini;Simiiformes;Catarrhini;Hominoidea;Hominidae;Ponginae;Pongo;Pongo abelii
UniRef100_UPI00122DAD9F	1	UPI00122DAD9F	zinc finger CCCH domain-containing protein 6	1189	5-1114	2.1e-204	682.6	Nomascus leucogenys (Northern white-cheeked gibbon) (Hylobates leucogenys)	61853	cellular organisms;Eukaryota;Opisthokonta;Metazoa;Eumetazoa;Bilateria;Deuterostomia;Chordata;Craniata;Vertebrata;Gnathostomata;Teleostomi;Euteleostomi;Sarcopterygii;Dipnotetrapodomorpha;Tetrapoda;Amniota;Mammalia;Theria;Eutheria;Boreoeutheria;Euarchontoglires;Primates;Haplorrhini;Simiiformes;Catarrhini;Hominoidea;Hylobatidae;Nomascus;Nomascus leucogenys
UniRef100_A0A2I3HGB0	1	A0A2I3HGB0	Zinc finger CCCH-type containing 6	1181	7-1106	2.2e-192	642.8	Nomascus leucogenys (Northern white-cheeked gibbon) (Hylobates leucogenys)	61853	cellular organisms;Eukaryota;Opisthokonta;Metazoa;Eumetazoa;Bilateria;Deuterostomia;Chordata;Craniata;Vertebrata;Gnathostomata;Teleostomi;Euteleostomi;Sarcopterygii;Dipnotetrapodomorpha;Tetrapoda;Amniota;Mammalia;Theria;Eutheria;Boreoeutheria;Euarchontoglires;Primates;Haplorrhini;Simiiformes;Catarrhini;Hominoidea;Hylobatidae;Nomascus;Nomascus leucogenys
UniRef100_UPI0012AE1DBB	1	UPI0012AE1DBB	zinc finger CCCH domain-containing protein 6	1188	5-1113	9.8e-205	683.7	Papio anubis (Olive baboon)	9555	cellular organisms;Eukaryota;Opisthokonta;Metazoa;Eumetazoa;Bilateria;Deuterostomia;Chordata;Craniata;Vertebrata;Gnathostomata;Teleostomi;Euteleostomi;Sarcopterygii;Dipnotetrapodomorpha;Tetrapoda;Amniota;Mammalia;Theria;Eutheria;Boreoeutheria;Euarchontoglires;Primates;Haplorrhini;Simiiformes;Catarrhini;Cercopithecoidea;Cercopithecidae;Cercopithecinae;Papio;Papio anubis
UniRef100_A0A096N5V7	1	A0A096N5V7	Zinc finger CCCH-type containing 6	1188	5-1113	2.1e-204	682.6	Papio anubis (Olive baboon)	9555	cellular organisms;Eukaryota;Opisthokonta;Metazoa;Eumetazoa;Bilateria;Deuterostomia;Chordata;Craniata;Vertebrata;Gnathostomata;Teleostomi;Euteleostomi;Sarcopterygii;Dipnotetrapodomorpha;Tetrapoda;Amniota;Mammalia;Theria;Eutheria;Boreoeutheria;Euarchontoglires;Primates;Haplorrhini;Simiiformes;Catarrhini;Cercopithecoidea;Cercopithecidae;Cercopithecinae;Papio;Papio anubis
UniRef100_A0A2K5ZN77	1	A0A2K5ZN77	Zinc finger CCCH-type containing 6	1188	5-1113	2.9e-204	682.2	Mandrillus leucophaeus (Drill) (Papio leucophaeus)	9568	cellular organisms;Eukaryota;Opisthokonta;Metazoa;Eumetazoa;Bilateria;Deuterostomia;Chordata;Craniata;Vertebrata;Gnathostomata;Teleostomi;Euteleostomi;Sarcopterygii;Dipnotetrapodomorpha;Tetrapoda;Amniota;Mammalia;Theria;Eutheria;Boreoeutheria;Euarchontoglires;Primates;Haplorrhini;Simiiformes;Catarrhini;Cercopithecoidea;Cercopithecidae;Cercopithecinae;Mandrillus;Mandrillus leucophaeus
UniRef100_A0A2K5MM98	2	A0A2K5MM98	Zinc finger CCCH-type containing 6	1188	5-1113	3.6e-204	681.8	Cercocebus atys (Sooty mangabey) (Cercocebus torquatus atys)	9531	cellular organisms;Eukaryota;Opisthokonta;Metazoa;Eumetazoa;Bilateria;Deuterostomia;Chordata;Craniata;Vertebrata;Gnathostomata;Teleostomi;Euteleostomi;Sarcopterygii;Dipnotetrapodomorpha;Tetrapoda;Amniota;Mammalia;Theria;Eutheria;Boreoeutheria;Euarchontoglires;Primates;Haplorrhini;Simiiformes;Catarrhini;Cercopithecoidea;Cercopithecidae;Cercopithecinae;Cercocebus;Cercocebus atys
UniRef100_UPI000DC18D17	1	UPI000DC18D17	zinc finger CCCH domain-containing protein 6	1188	5-1113	6.2e-204	681.0	Theropithecus gelada (Gelada baboon)	9565	cellular organisms;Eukaryota;Opisthokonta;Metazoa;Eumetazoa;Bilateria;Deuterostomia;Chordata;Craniata;Vertebrata;Gnathostomata;Teleostomi;Euteleostomi;Sarcopterygii;Dipnotetrapodomorpha;Tetrapoda;Amniota;Mammalia;Theria;Eutheria;Boreoeutheria;Euarchontoglires;Primates;Haplorrhini;Simiiformes;Catarrhini;Cercopithecoidea;Cercopithecidae;Cercopithecinae;Theropithecus;Theropithecus gelada
UniRef100_A0A0D9RW58	2	A0A0D9RW58	Zinc finger CCCH-type containing 6	1068	3-993	8.6e-175	584.6	Chlorocebus sabaeus (Green monkey) (Cercopithecus sabaeus)	60711	cellular organisms;Eukaryota;Opisthokonta;Metazoa;Eumetazoa;Bilateria;Deuterostomia;Chordata;Craniata;Vertebrata;Gnathostomata;Teleostomi;Euteleostomi;Sarcopterygii;Dipnotetrapodomorpha;Tetrapoda;Amniota;Mammalia;Theria;Eutheria;Boreoeutheria;Euarchontoglires;Primates;Haplorrhini;Simiiformes;Catarrhini;Cercopithecoidea;Cercopithecidae;Cercopithecinae;Chlorocebus;Chlorocebus sabaeus
UniRef100_F7GTV4	1	F7GTV4	Zinc finger CCCH-type containing 6	1188	5-1113	2.4e-204	682.4	Macaca mulatta (Rhesus macaque)	9544	cellular organisms;Eukaryota;Opisthokonta;Metazoa;Eumetazoa;Bilateria;Deuterostomia;Chordata;Craniata;Vertebrata;Gnathostomata;Teleostomi;Euteleostomi;Sarcopterygii;Dipnotetrapodomorpha;Tetrapoda;Amniota;Mammalia;Theria;Eutheria;Boreoeutheria;Euarchontoglires;Primates;Haplorrhini;Simiiformes;Catarrhini;Cercopithecoidea;Cercopithecidae;Cercopithecinae;Macaca;Macaca mulatta
UniRef100_A0A2K6BRM7	2	A0A2K6BRM7	Zinc finger CCCH-type containing 6	1188	5-1113	3.4e-204	681.9	Macaca nemestrina (Pig-tailed macaque)	9545	cellular organisms;Eukaryota;Opisthokonta;Metazoa;Eumetazoa;Bilateria;Deuterostomia;Chordata;Craniata;Vertebrata;Gnathostomata;Teleostomi;Euteleostomi;Sarcopterygii;Dipnotetrapodomorpha;Tetrapoda;Amniota;Mammalia;Theria;Eutheria;Boreoeutheria;Euarchontoglires;Primates;Haplorrhini;Simiiformes;Catarrhini;Cercopithecoidea;Cercopithecidae;Cercopithecinae;Macaca;Macaca nemestrina
UniRef100_A0A2K5W447	1	A0A2K5W447	Zinc finger CCCH-type containing 6	1188	5-1113	2.9e-204	682.1	Macaca fascicularis (Crab-eating macaque) (Cynomolgus monkey)	9541	cellular organisms;Eukaryota;Opisthokonta;Metazoa;Eumetazoa;Bilateria;Deuterostomia;Chordata;Craniata;Vertebrata;Gnathostomata;Teleostomi;Euteleostomi;Sarcopterygii;Dipnotetrapodomorpha;Tetrapoda;Amniota;Mammalia;Theria;Eutheria;Boreoeutheria;Euarchontoglires;Primates;Haplorrhini;Simiiformes;Catarrhini;Cercopithecoidea;Cercopithecidae;Cercopithecinae;Macaca;Macaca fascicularis
UniRef100_G7PMY9	1	G7PMY9	Uncharacterized protein	1188	5-1114	3.5e-204	681.8	Macaca fascicularis (Crab-eating macaque) (Cynomolgus monkey)	9541	cellular organisms;Eukaryota;Opisthokonta;Metazoa;Eumetazoa;Bilateria;Deuterostomia;Chordata;Craniata;Vertebrata;Gnathostomata;Teleostomi;Euteleostomi;Sarcopterygii;Dipnotetrapodomorpha;Tetrapoda;Amniota;Mammalia;Theria;Eutheria;Boreoeutheria;Euarchontoglires;Primates;Haplorrhini;Simiiformes;Catarrhini;Cercopithecoidea;Cercopithecidae;Cercopithecinae;Macaca;Macaca fascicularis
UniRef100_G7NAX4	1	G7NAX4	Uncharacterized protein	1188	5-1113	3.3e-204	681.9	Macaca mulatta (Rhesus macaque)	9544	cellular organisms;Eukaryota;Opisthokonta;Metazoa;Eumetazoa;Bilateria;Deuterostomia;Chordata;Craniata;Vertebrata;Gnathostomata;Teleostomi;Euteleostomi;Sarcopterygii;Dipnotetrapodomorpha;Tetrapoda;Amniota;Mammalia;Theria;Eutheria;Boreoeutheria;Euarchontoglires;Primates;Haplorrhini;Simiiformes;Catarrhini;Cercopithecoidea;Cercopithecidae;Cercopithecinae;Macaca;Macaca mulatta
UniRef100_G3QH21	1	G3QH21	Zinc finger CCCH-type containing 6	1179	4-1104	2.4e-196	656.0	Gorilla gorilla gorilla (Western lowland gorilla)	9595	cellular organisms;Eukaryota;Opisthokonta;Metazoa;Eumetazoa;Bilateria;Deuterostomia;Chordata;Craniata;Vertebrata;Gnathostomata;Teleostomi;Euteleostomi;Sarcopterygii;Dipnotetrapodomorpha;Tetrapoda;Amniota;Mammalia;Theria;Eutheria;Boreoeutheria;Euarchontoglires;Primates;Haplorrhini;Simiiformes;Catarrhini;Hominoidea;Hominidae;Homininae;Gorilla;Gorilla gorilla;Gorilla gorilla gorilla
UniRef100_A0A2I3MRT5	1	A0A2I3MRT5	Zinc finger CCCH-type containing 6	1185	11-1110	1.8e-193	646.5	Papio anubis (Olive baboon)	9555	cellular organisms;Eukaryota;Opisthokonta;Metazoa;Eumetazoa;Bilateria;Deuterostomia;Chordata;Craniata;Vertebrata;Gnathostomata;Teleostomi;Euteleostomi;Sarcopterygii;Dipnotetrapodomorpha;Tetrapoda;Amniota;Mammalia;Theria;Eutheria;Boreoeutheria;Euarchontoglires;Primates;Haplorrhini;Simiiformes;Catarrhini;Cercopithecoidea;Cercopithecidae;Cercopithecinae;Papio;Papio anubis
UniRef100_A0A2K5ZN36	1	A0A2K5ZN36	Zinc finger CCCH-type containing 6	1185	11-1110	2.4e-193	646.0	Mandrillus leucophaeus (Drill) (Papio leucophaeus)	9568	cellular organisms;Eukaryota;Opisthokonta;Metazoa;Eumetazoa;Bilateria;Deuterostomia;Chordata;Craniata;Vertebrata;Gnathostomata;Teleostomi;Euteleostomi;Sarcopterygii;Dipnotetrapodomorpha;Tetrapoda;Amniota;Mammalia;Theria;Eutheria;Boreoeutheria;Euarchontoglires;Primates;Haplorrhini;Simiiformes;Catarrhini;Cercopithecoidea;Cercopithecidae;Cercopithecinae;Mandrillus;Mandrillus leucophaeus
UniRef100_A0A2K5MMC6	1	A0A2K5MMC6	Zinc finger CCCH-type containing 6	1185	11-1110	3e-193	645.7	Cercocebus atys (Sooty mangabey) (Cercocebus torquatus atys)	9531	cellular organisms;Eukaryota;Opisthokonta;Metazoa;Eumetazoa;Bilateria;Deuterostomia;Chordata;Craniata;Vertebrata;Gnathostomata;Teleostomi;Euteleostomi;Sarcopterygii;Dipnotetrapodomorpha;Tetrapoda;Amniota;Mammalia;Theria;Eutheria;Boreoeutheria;Euarchontoglires;Primates;Haplorrhini;Simiiformes;Catarrhini;Cercopithecoidea;Cercopithecidae;Cercopithecinae;Cercocebus;Cercocebus atys
UniRef100_A0A2K5W433	1	A0A2K5W433	Zinc finger CCCH-type containing 6	1185	11-1110	2.4e-193	646.0	Macaca fascicularis (Crab-eating macaque) (Cynomolgus monkey)	9541	cellular organisms;Eukaryota;Opisthokonta;Metazoa;Eumetazoa;Bilateria;Deuterostomia;Chordata;Craniata;Vertebrata;Gnathostomata;Teleostomi;Euteleostomi;Sarcopterygii;Dipnotetrapodomorpha;Tetrapoda;Amniota;Mammalia;Theria;Eutheria;Boreoeutheria;Euarchontoglires;Primates;Haplorrhini;Simiiformes;Catarrhini;Cercopithecoidea;Cercopithecidae;Cercopithecinae;Macaca;Macaca fascicularis
UniRef100_A0A2K6BRV0	1	A0A2K6BRV0	Zinc finger CCCH-type containing 6	1185	11-1110	2.8e-193	645.8	Macaca nemestrina (Pig-tailed macaque)	9545	cellular organisms;Eukaryota;Opisthokonta;Metazoa;Eumetazoa;Bilateria;Deuterostomia;Chordata;Craniata;Vertebrata;Gnathostomata;Teleostomi;Euteleostomi;Sarcopterygii;Dipnotetrapodomorpha;Tetrapoda;Amniota;Mammalia;Theria;Eutheria;Boreoeutheria;Euarchontoglires;Primates;Haplorrhini;Simiiformes;Catarrhini;Cercopithecoidea;Cercopithecidae;Cercopithecinae;Macaca;Macaca nemestrina
UniRef100_UPI0012373761	1	UPI0012373761	zinc finger CCCH domain-containing protein 6	1188	5-1113	3.3e-204	681.9	Rhinopithecus roxellana (Golden snub-nosed monkey) (Pygathrix roxellana)	61622	cellular organisms;Eukaryota;Opisthokonta;Metazoa;Eumetazoa;Bilateria;Deuterostomia;Chordata;Craniata;Vertebrata;Gnathostomata;Teleostomi;Euteleostomi;Sarcopterygii;Dipnotetrapodomorpha;Tetrapoda;Amniota;Mammalia;Theria;Eutheria;Boreoeutheria;Euarchontoglires;Primates;Haplorrhini;Simiiformes;Catarrhini;Cercopithecoidea;Cercopithecidae;Colobinae;Rhinopithecus;Rhinopithecus roxellana
UniRef100_A0A2K6KZ61	1	A0A2K6KZ61	Zinc finger CCCH-type containing 6	1170	9-1095	6.3e-173	578.5	Rhinopithecus bieti (Black snub-nosed monkey) (Pygathrix bieti)	61621	cellular organisms;Eukaryota;Opisthokonta;Metazoa;Eumetazoa;Bilateria;Deuterostomia;Chordata;Craniata;Vertebrata;Gnathostomata;Teleostomi;Euteleostomi;Sarcopterygii;Dipnotetrapodomorpha;Tetrapoda;Amniota;Mammalia;Theria;Eutheria;Boreoeutheria;Euarchontoglires;Primates;Haplorrhini;Simiiformes;Catarrhini;Cercopithecoidea;Cercopithecidae;Colobinae;Rhinopithecus;Rhinopithecus bieti
UniRef100_A0A2K6N7H4	1	A0A2K6N7H4	Zinc finger CCCH-type containing 6	1144	9-1070	2.7e-163	546.6	Rhinopithecus roxellana (Golden snub-nosed monkey) (Pygathrix roxellana)	61622	cellular organisms;Eukaryota;Opisthokonta;Metazoa;Eumetazoa;Bilateria;Deuterostomia;Chordata;Craniata;Vertebrata;Gnathostomata;Teleostomi;Euteleostomi;Sarcopterygii;Dipnotetrapodomorpha;Tetrapoda;Amniota;Mammalia;Theria;Eutheria;Boreoeutheria;Euarchontoglires;Primates;Haplorrhini;Simiiformes;Catarrhini;Cercopithecoidea;Cercopithecidae;Colobinae;Rhinopithecus;Rhinopithecus roxellana
UniRef100_A0A2K6N7H8	1	A0A2K6N7H8	Zinc finger CCCH-type containing 6	1150	5-1076	1.9e-169	567.0	Rhinopithecus roxellana (Golden snub-nosed monkey) (Pygathrix roxellana)	61622	cellular organisms;Eukaryota;Opisthokonta;Metazoa;Eumetazoa;Bilateria;Deuterostomia;Chordata;Craniata;Vertebrata;Gnathostomata;Teleostomi;Euteleostomi;Sarcopterygii;Dipnotetrapodomorpha;Tetrapoda;Amniota;Mammalia;Theria;Eutheria;Boreoeutheria;Euarchontoglires;Primates;Haplorrhini;Simiiformes;Catarrhini;Cercopithecoidea;Cercopithecidae;Colobinae;Rhinopithecus;Rhinopithecus roxellana
UniRef100_UPI000C2B1CDB	2	UPI000C2B1CDB	zinc finger CCCH domain-containing protein 6 isoform X1	1197	18-1122	2.8e-203	678.9	Piliocolobus tephrosceles (Ugandan red Colobus)	591936	cellular organisms;Eukaryota;Opisthokonta;Metazoa;Eumetazoa;Bilateria;Deuterostomia;Chordata;Craniata;Vertebrata;Gnathostomata;Teleostomi;Euteleostomi;Sarcopterygii;Dipnotetrapodomorpha;Tetrapoda;Amniota;Mammalia;Theria;Eutheria;Boreoeutheria;Euarchontoglires;Primates;Haplorrhini;Simiiformes;Catarrhini;Cercopithecoidea;Cercopithecidae;Colobinae;Piliocolobus;Piliocolobus tephrosceles
UniRef100_UPI000C2A463E	1	UPI000C2A463E	zinc finger CCCH domain-containing protein 6 isoform X2	1188	5-1113	3.2e-203	678.7	Piliocolobus tephrosceles (Ugandan red Colobus)	591936	cellular organisms;Eukaryota;Opisthokonta;Metazoa;Eumetazoa;Bilateria;Deuterostomia;Chordata;Craniata;Vertebrata;Gnathostomata;Teleostomi;Euteleostomi;Sarcopterygii;Dipnotetrapodomorpha;Tetrapoda;Amniota;Mammalia;Theria;Eutheria;Boreoeutheria;Euarchontoglires;Primates;Haplorrhini;Simiiformes;Catarrhini;Cercopithecoidea;Cercopithecidae;Colobinae;Piliocolobus;Piliocolobus tephrosceles
UniRef100_A0A2K5K0X1	1	A0A2K5K0X1	Zinc finger CCCH-type containing 6	1177	1-1102	8.2e-204	680.6	Colobus angolensis palliatus (Peters' Angolan colobus)	336983	cellular organisms;Eukaryota;Opisthokonta;Metazoa;Eumetazoa;Bilateria;Deuterostomia;Chordata;Craniata;Vertebrata;Gnathostomata;Teleostomi;Euteleostomi;Sarcopterygii;Dipnotetrapodomorpha;Tetrapoda;Amniota;Mammalia;Theria;Eutheria;Boreoeutheria;Euarchontoglires;Primates;Haplorrhini;Simiiformes;Catarrhini;Cercopithecoidea;Cercopithecidae;Colobinae;Colobus;Colobus angolensis;Colobus angolensis pallia…
UniRef100_A0A2K5CV66	2	A0A2K5CV66	Zinc finger CCCH-type containing 6	1190	5-1117	2.5e-206	689.0	Aotus nancymaae (Ma's night monkey)	37293	cellular organisms;Eukaryota;Opisthokonta;Metazoa;Eumetazoa;Bilateria;Deuterostomia;Chordata;Craniata;Vertebrata;Gnathostomata;Teleostomi;Euteleostomi;Sarcopterygii;Dipnotetrapodomorpha;Tetrapoda;Amniota;Mammalia;Theria;Eutheria;Boreoeutheria;Euarchontoglires;Primates;Haplorrhini;Simiiformes;Platyrrhini;Aotidae;Aotus;Aotus nancymaae
UniRef100_UPI0001CA4016	1	UPI0001CA4016	zinc finger CCCH domain-containing protein 6	1190	5-1122	2.8e-206	688.8	Callithrix jacchus (White-tufted-ear marmoset)	9483	cellular organisms;Eukaryota;Opisthokonta;Metazoa;Eumetazoa;Bilateria;Deuterostomia;Chordata;Craniata;Vertebrata;Gnathostomata;Teleostomi;Euteleostomi;Sarcopterygii;Dipnotetrapodomorpha;Tetrapoda;Amniota;Mammalia;Theria;Eutheria;Boreoeutheria;Euarchontoglires;Primates;Haplorrhini;Simiiformes;Platyrrhini;Cebidae;Callitrichinae;Callithrix;Callithrix;Callithrix jacchus
UniRef100_A0A2K5CV65	1	A0A2K5CV65	Zinc finger CCCH-type containing 6	1187	4-1114	1.7e-195	653.1	Aotus nancymaae (Ma's night monkey)	37293	cellular organisms;Eukaryota;Opisthokonta;Metazoa;Eumetazoa;Bilateria;Deuterostomia;Chordata;Craniata;Vertebrata;Gnathostomata;Teleostomi;Euteleostomi;Sarcopterygii;Dipnotetrapodomorpha;Tetrapoda;Amniota;Mammalia;Theria;Eutheria;Boreoeutheria;Euarchontoglires;Primates;Haplorrhini;Simiiformes;Platyrrhini;Aotidae;Aotus;Aotus nancymaae
UniRef100_A0A2K6URV3	1	A0A2K6URV3	Zinc finger CCCH-type containing 6	1188	12-1115	2.7e-195	652.5	Saimiri boliviensis boliviensis (Bolivian squirrel monkey)	39432	cellular organisms;Eukaryota;Opisthokonta;Metazoa;Eumetazoa;Bilateria;Deuterostomia;Chordata;Craniata;Vertebrata;Gnathostomata;Teleostomi;Euteleostomi;Sarcopterygii;Dipnotetrapodomorpha;Tetrapoda;Amniota;Mammalia;Theria;Eutheria;Boreoeutheria;Euarchontoglires;Primates;Haplorrhini;Simiiformes;Platyrrhini;Cebidae;Saimiriinae;Saimiri;Saimiri boliviensis;Saimiri boliviensis boliviensis
UniRef100_F6Z2A6	1	F6Z2A6	Zinc finger CCCH-type containing 6	1184	8-1116	3.1e-195	652.3	Callithrix jacchus (White-tufted-ear marmoset)	9483	cellular organisms;Eukaryota;Opisthokonta;Metazoa;Eumetazoa;Bilateria;Deuterostomia;Chordata;Craniata;Vertebrata;Gnathostomata;Teleostomi;Euteleostomi;Sarcopterygii;Dipnotetrapodomorpha;Tetrapoda;Amniota;Mammalia;Theria;Eutheria;Boreoeutheria;Euarchontoglires;Primates;Haplorrhini;Simiiformes;Platyrrhini;Cebidae;Callitrichinae;Callithrix;Callithrix;Callithrix jacchus
UniRef100_U3EKR1	1	U3EKR1	Zinc finger CCCH domain-containing protein 6	1190	5-1122	2.2e-205	685.8	Callithrix jacchus (White-tufted-ear marmoset)	9483	cellular organisms;Eukaryota;Opisthokonta;Metazoa;Eumetazoa;Bilateria;Deuterostomia;Chordata;Craniata;Vertebrata;Gnathostomata;Teleostomi;Euteleostomi;Sarcopterygii;Dipnotetrapodomorpha;Tetrapoda;Amniota;Mammalia;Theria;Eutheria;Boreoeutheria;Euarchontoglires;Primates;Haplorrhini;Simiiformes;Platyrrhini;Cebidae;Callitrichinae;Callithrix;Callithrix;Callithrix jacchus
UniRef100_A0A2K6URZ3	2	A0A2K6URZ3	Zinc finger CCCH-type containing 6	1190	5-1117	3.3e-206	688.5	Saimiri boliviensis boliviensis (Bolivian squirrel monkey)	39432	cellular organisms;Eukaryota;Opisthokonta;Metazoa;Eumetazoa;Bilateria;Deuterostomia;Chordata;Craniata;Vertebrata;Gnathostomata;Teleostomi;Euteleostomi;Sarcopterygii;Dipnotetrapodomorpha;Tetrapoda;Amniota;Mammalia;Theria;Eutheria;Boreoeutheria;Euarchontoglires;Primates;Haplorrhini;Simiiformes;Platyrrhini;Cebidae;Saimiriinae;Saimiri;Saimiri boliviensis;Saimiri boliviensis boliviensis
UniRef100_UPI000809F0CF	1	UPI000809F0CF	zinc finger CCCH domain-containing protein 6	880	5-807	3.9e-200	668.5	Cebus capucinus imitator	1737458	cellular organisms;Eukaryota;Opisthokonta;Metazoa;Eumetazoa;Bilateria;Deuterostomia;Chordata;Craniata;Vertebrata;Gnathostomata;Teleostomi;Euteleostomi;Sarcopterygii;Dipnotetrapodomorpha;Tetrapoda;Amniota;Mammalia;Theria;Eutheria;Boreoeutheria;Euarchontoglires;Primates;Haplorrhini;Simiiformes;Platyrrhini;Cebidae;Cebinae;Cebus;Cebus capucinus;Cebus capucinus imitator
UniRef100_UPI00064323F8	1	UPI00064323F8	zinc finger CCCH domain-containing protein 6	1186	5-1117	1.3e-202	676.7	Microcebus murinus (Lesser mouse lemur) (Gray Mouse Lemur)	30608	cellular organisms;Eukaryota;Opisthokonta;Metazoa;Eumetazoa;Bilateria;Deuterostomia;Chordata;Craniata;Vertebrata;Gnathostomata;Teleostomi;Euteleostomi;Sarcopterygii;Dipnotetrapodomorpha;Tetrapoda;Amniota;Mammalia;Theria;Eutheria;Boreoeutheria;Euarchontoglires;Primates;Strepsirrhini;Lemuriformes;Cheirogaleidae;Microcebus;Microcebus murinus
UniRef100_A0A2K6F8L8	1	A0A2K6F8L8	Zinc finger CCCH-type containing 6	1188	5-1108	3.3e-201	672.0	Propithecus coquereli (Coquerel's sifaka) (Propithecus verreauxi coquereli)	379532	cellular organisms;Eukaryota;Opisthokonta;Metazoa;Eumetazoa;Bilateria;Deuterostomia;Chordata;Craniata;Vertebrata;Gnathostomata;Teleostomi;Euteleostomi;Sarcopterygii;Dipnotetrapodomorpha;Tetrapoda;Amniota;Mammalia;Theria;Eutheria;Boreoeutheria;Euarchontoglires;Primates;Strepsirrhini;Lemuriformes;Indriidae;Propithecus;Propithecus coquereli
UniRef100_UPI00063FC74E	1	UPI00063FC74E	LOW QUALITY PROTEIN: zinc finger CCCH domain-containing protein 6	1167	14-1087	3.2e-187	625.8	Propithecus coquereli (Coquerel's sifaka) (Propithecus verreauxi coquereli)	379532	cellular organisms;Eukaryota;Opisthokonta;Metazoa;Eumetazoa;Bilateria;Deuterostomia;Chordata;Craniata;Vertebrata;Gnathostomata;Teleostomi;Euteleostomi;Sarcopterygii;Dipnotetrapodomorpha;Tetrapoda;Amniota;Mammalia;Theria;Eutheria;Boreoeutheria;Euarchontoglires;Primates;Strepsirrhini;Lemuriformes;Indriidae;Propithecus;Propithecus coquereli
UniRef100_UPI0006444EA8	1	UPI0006444EA8	zinc finger CCCH domain-containing protein 6	1188	5-1116	4.1e-198	661.8	Otolemur garnettii (Small-eared galago) (Garnett's greater bushbaby)	30611	cellular organisms;Eukaryota;Opisthokonta;Metazoa;Eumetazoa;Bilateria;Deuterostomia;Chordata;Craniata;Vertebrata;Gnathostomata;Teleostomi;Euteleostomi;Sarcopterygii;Dipnotetrapodomorpha;Tetrapoda;Amniota;Mammalia;Theria;Eutheria;Boreoeutheria;Euarchontoglires;Primates;Strepsirrhini;Lorisiformes;Galagidae;Otolemur;Otolemur garnettii
UniRef100_H0WKZ9	1	H0WKZ9	Zinc finger CCCH-type containing 6	1178	2-1106	5.7e-197	658.0	Otolemur garnettii (Small-eared galago) (Garnett's greater bushbaby)	30611	cellular organisms;Eukaryota;Opisthokonta;Metazoa;Eumetazoa;Bilateria;Deuterostomia;Chordata;Craniata;Vertebrata;Gnathostomata;Teleostomi;Euteleostomi;Sarcopterygii;Dipnotetrapodomorpha;Tetrapoda;Amniota;Mammalia;Theria;Eutheria;Boreoeutheria;Euarchontoglires;Primates;Strepsirrhini;Lorisiformes;Galagidae;Otolemur;Otolemur garnettii
UniRef100_A0A1U7TNG5	1	A0A1U7TNG5	zinc finger CCCH domain-containing protein 6	1184	5-1110	3.6e-200	668.6	Tarsius syrichta (Philippine tarsier)	1868482	cellular organisms;Eukaryota;Opisthokonta;Metazoa;Eumetazoa;Bilateria;Deuterostomia;Chordata;Craniata;Vertebrata;Gnathostomata;Teleostomi;Euteleostomi;Sarcopterygii;Dipnotetrapodomorpha;Tetrapoda;Amniota;Mammalia;Theria;Eutheria;Boreoeutheria;Euarchontoglires;Primates;Haplorrhini;Tarsiiformes;Tarsiidae;Carlito;Carlito syrichta
UniRef100_UPI0003C8FBCA	1	UPI0003C8FBCA	zinc finger CCCH domain-containing protein 6	1227	14-686	3.6e-123	413.8	Tupaia chinensis (Chinese tree shrew)	246437	cellular organisms;Eukaryota;Opisthokonta;Metazoa;Eumetazoa;Bilateria;Deuterostomia;Chordata;Craniata;Vertebrata;Gnathostomata;Teleostomi;Euteleostomi;Sarcopterygii;Dipnotetrapodomorpha;Tetrapoda;Amniota;Mammalia;Theria;Eutheria;Boreoeutheria;Euarchontoglires;Scandentia;Tupaiidae;Tupaia;Tupaia chinensis
UniRef100_A0A091DAS7	2	A0A091DAS7	Zinc finger CCCH domain-containing protein 6	1214	30-1140	7.4e-206	687.4	Fukomys damarensis (Damaraland mole rat) (Cryptomys damarensis)	885580	cellular organisms;Eukaryota;Opisthokonta;Metazoa;Eumetazoa;Bilateria;Deuterostomia;Chordata;Craniata;Vertebrata;Gnathostomata;Teleostomi;Euteleostomi;Sarcopterygii;Dipnotetrapodomorpha;Tetrapoda;Amniota;Mammalia;Theria;Eutheria;Boreoeutheria;Euarchontoglires;Glires;Rodentia;Hystricomorpha;Bathyergidae;Fukomys;Fukomys damarensis
UniRef100_UPI000A357ABC	1	UPI000A357ABC	zinc finger CCCH domain-containing protein 6 isoform X1	1187	5-1120	1.9e-192	643.0	Heterocephalus glaber (Naked mole rat)	10181	cellular organisms;Eukaryota;Opisthokonta;Metazoa;Eumetazoa;Bilateria;Deuterostomia;Chordata;Craniata;Vertebrata;Gnathostomata;Teleostomi;Euteleostomi;Sarcopterygii;Dipnotetrapodomorpha;Tetrapoda;Amniota;Mammalia;Theria;Eutheria;Boreoeutheria;Euarchontoglires;Glires;Rodentia;Hystricomorpha;Bathyergidae;Heterocephalus;Heterocephalus glaber
UniRef100_UPI000A346940	1	UPI000A346940	zinc finger CCCH domain-containing protein 6 isoform X2	1180	6-1113	1.3e-191	640.3	Heterocephalus glaber (Naked mole rat)	10181	cellular organisms;Eukaryota;Opisthokonta;Metazoa;Eumetazoa;Bilateria;Deuterostomia;Chordata;Craniata;Vertebrata;Gnathostomata;Teleostomi;Euteleostomi;Sarcopterygii;Dipnotetrapodomorpha;Tetrapoda;Amniota;Mammalia;Theria;Eutheria;Boreoeutheria;Euarchontoglires;Glires;Rodentia;Hystricomorpha;Bathyergidae;Heterocephalus;Heterocephalus glaber
UniRef100_G5BFC6	1	G5BFC6	Zinc finger CCCH domain-containing protein 6	1143	12-1076	1.9e-177	593.4	Heterocephalus glaber (Naked mole rat)	10181	cellular organisms;Eukaryota;Opisthokonta;Metazoa;Eumetazoa;Bilateria;Deuterostomia;Chordata;Craniata;Vertebrata;Gnathostomata;Teleostomi;Euteleostomi;Sarcopterygii;Dipnotetrapodomorpha;Tetrapoda;Amniota;Mammalia;Theria;Eutheria;Boreoeutheria;Euarchontoglires;Glires;Rodentia;Hystricomorpha;Bathyergidae;Heterocephalus;Heterocephalus glaber
UniRef100_UPI000A33E37D	1	UPI000A33E37D	zinc finger CCCH domain-containing protein 6 isoform X3	1118	3-1051	9.5e-175	584.5	Heterocephalus glaber (Naked mole rat)	10181	cellular organisms;Eukaryota;Opisthokonta;Metazoa;Eumetazoa;Bilateria;Deuterostomia;Chordata;Craniata;Vertebrata;Gnathostomata;Teleostomi;Euteleostomi;Sarcopterygii;Dipnotetrapodomorpha;Tetrapoda;Amniota;Mammalia;Theria;Eutheria;Boreoeutheria;Euarchontoglires;Glires;Rodentia;Hystricomorpha;Bathyergidae;Heterocephalus;Heterocephalus glaber
UniRef100_UPI000696C196	1	UPI000696C196	zinc finger CCCH domain-containing protein 6	1212	32-1143	6.7e-199	664.4	Chinchilla lanigera (Long-tailed chinchilla) (Chinchilla villidera)	34839	cellular organisms;Eukaryota;Opisthokonta;Metazoa;Eumetazoa;Bilateria;Deuterostomia;Chordata;Craniata;Vertebrata;Gnathostomata;Teleostomi;Euteleostomi;Sarcopterygii;Dipnotetrapodomorpha;Tetrapoda;Amniota;Mammalia;Theria;Eutheria;Boreoeutheria;Euarchontoglires;Glires;Rodentia;Hystricomorpha;Chinchillidae;Chinchilla;Chinchilla lanigera
UniRef100_UPI000C9FE123	1	UPI000C9FE123	zinc finger CCCH domain-containing protein 6 isoform X1	1184	5-1099	1.6e-195	653.2	Octodon degus (Degu) (Sciurus degus)	10160	cellular organisms;Eukaryota;Opisthokonta;Metazoa;Eumetazoa;Bilateria;Deuterostomia;Chordata;Craniata;Vertebrata;Gnathostomata;Teleostomi;Euteleostomi;Sarcopterygii;Dipnotetrapodomorpha;Tetrapoda;Amniota;Mammalia;Theria;Eutheria;Boreoeutheria;Euarchontoglires;Glires;Rodentia;Hystricomorpha;Octodontidae;Octodon;Octodon degus
UniRef100_UPI000C877BCA	1	UPI000C877BCA	LOW QUALITY PROTEIN: zinc finger CCCH domain-containing protein 6	1181	6-1110	2e-188	629.7	Cavia porcellus (Guinea pig)	10141	cellular organisms;Eukaryota;Opisthokonta;Metazoa;Eumetazoa;Bilateria;Deuterostomia;Chordata;Craniata;Vertebrata;Gnathostomata;Teleostomi;Euteleostomi;Sarcopterygii;Dipnotetrapodomorpha;Tetrapoda;Amniota;Mammalia;Theria;Eutheria;Boreoeutheria;Euarchontoglires;Glires;Rodentia;Hystricomorpha;Caviidae;Cavia;Cavia porcellus
UniRef100_A0A1S3FEY9	1	A0A1S3FEY9	zinc finger CCCH domain-containing protein 6	1181	6-1104	8.6e-195	650.8	Dipodomys ordii (Ord's kangaroo rat)	10020	cellular organisms;Eukaryota;Opisthokonta;Metazoa;Eumetazoa;Bilateria;Deuterostomia;Chordata;Craniata;Vertebrata;Gnathostomata;Teleostomi;Euteleostomi;Sarcopterygii;Dipnotetrapodomorpha;Tetrapoda;Amniota;Mammalia;Theria;Eutheria;Boreoeutheria;Euarchontoglires;Glires;Rodentia;Castorimorpha;Heteromyidae;Dipodomyinae;Dipodomys;Dipodomys ordii
UniRef100_UPI000982522A	1	UPI000982522A	LOW QUALITY PROTEIN: zinc finger CCCH domain-containing protein 6-like	945	8-873	2.3e-144	483.9	Castor canadensis (American beaver)	51338	cellular organisms;Eukaryota;Opisthokonta;Metazoa;Eumetazoa;Bilateria;Deuterostomia;Chordata;Craniata;Vertebrata;Gnathostomata;Teleostomi;Euteleostomi;Sarcopterygii;Dipnotetrapodomorpha;Tetrapoda;Amniota;Mammalia;Theria;Eutheria;Boreoeutheria;Euarchontoglires;Glires;Rodentia;Castorimorpha;Castoridae;Castor;Castor canadensis
UniRef100_A0A250Y5Y2	1	A0A250Y5Y2	Zinc finger CCCH domain-containing protein 6	929	1-860	6.7e-141	472.5	Castor canadensis (American beaver)	51338	cellular organisms;Eukaryota;Opisthokonta;Metazoa;Eumetazoa;Bilateria;Deuterostomia;Chordata;Craniata;Vertebrata;Gnathostomata;Teleostomi;Euteleostomi;Sarcopterygii;Dipnotetrapodomorpha;Tetrapoda;Amniota;Mammalia;Theria;Eutheria;Boreoeutheria;Euarchontoglires;Glires;Rodentia;Castorimorpha;Castoridae;Castor;Castor canadensis
UniRef100_UPI0010A1E89B	1	UPI0010A1E89B	zinc finger CCCH domain-containing protein 6	1177	5-1090	4e-189	632.1	Peromyscus leucopus (White-footed mouse)	10041	cellular organisms;Eukaryota;Opisthokonta;Metazoa;Eumetazoa;Bilateria;Deuterostomia;Chordata;Craniata;Vertebrata;Gnathostomata;Teleostomi;Euteleostomi;Sarcopterygii;Dipnotetrapodomorpha;Tetrapoda;Amniota;Mammalia;Theria;Eutheria;Boreoeutheria;Euarchontoglires;Glires;Rodentia;Myomorpha;Muroidea;Cricetidae;Neotominae;Peromyscus;Peromyscus leucopus
UniRef100_UPI00077DA8A1	1	UPI00077DA8A1	zinc finger CCCH domain-containing protein 6 isoform X2	1186	17-1094	4.5e-188	628.6	Peromyscus maniculatus bairdii (Prairie deer mouse)	230844	cellular organisms;Eukaryota;Opisthokonta;Metazoa;Eumetazoa;Bilateria;Deuterostomia;Chordata;Craniata;Vertebrata;Gnathostomata;Teleostomi;Euteleostomi;Sarcopterygii;Dipnotetrapodomorpha;Tetrapoda;Amniota;Mammalia;Theria;Eutheria;Boreoeutheria;Euarchontoglires;Glires;Rodentia;Myomorpha;Muroidea;Cricetidae;Neotominae;Peromyscus;Peromyscus maniculatus;Peromyscus maniculatus bairdii
UniRef100_UPI00077DB54A	1	UPI00077DB54A	zinc finger CCCH domain-containing protein 6 isoform X1	1190	21-1102	2.3e-187	626.2	Peromyscus maniculatus bairdii (Prairie deer mouse)	230844	cellular organisms;Eukaryota;Opisthokonta;Metazoa;Eumetazoa;Bilateria;Deuterostomia;Chordata;Craniata;Vertebrata;Gnathostomata;Teleostomi;Euteleostomi;Sarcopterygii;Dipnotetrapodomorpha;Tetrapoda;Amniota;Mammalia;Theria;Eutheria;Boreoeutheria;Euarchontoglires;Glires;Rodentia;Myomorpha;Muroidea;Cricetidae;Neotominae;Peromyscus;Peromyscus maniculatus;Peromyscus maniculatus bairdii
UniRef100_A0A1A6HKH9	1	A0A1A6HKH9	Uncharacterized protein	1403	67-1036	2e-155	520.5	Neotoma lepida (Desert woodrat)	56216	cellular organisms;Eukaryota;Opisthokonta;Metazoa;Eumetazoa;Bilateria;Deuterostomia;Chordata;Craniata;Vertebrata;Gnathostomata;Teleostomi;Euteleostomi;Sarcopterygii;Dipnotetrapodomorpha;Tetrapoda;Amniota;Mammalia;Theria;Eutheria;Boreoeutheria;Euarchontoglires;Glires;Rodentia;Myomorpha;Muroidea;Cricetidae;Neotominae;Neotoma;Neotoma lepida
UniRef100_UPI00038C19EF	1	UPI00038C19EF	zinc finger CCCH domain-containing protein 6	1175	5-1094	8.4e-178	594.6	Microtus ochrogaster (Prairie vole)	79684	cellular organisms;Eukaryota;Opisthokonta;Metazoa;Eumetazoa;Bilateria;Deuterostomia;Chordata;Craniata;Vertebrata;Gnathostomata;Teleostomi;Euteleostomi;Sarcopterygii;Dipnotetrapodomorpha;Tetrapoda;Amniota;Mammalia;Theria;Eutheria;Boreoeutheria;Euarchontoglires;Glires;Rodentia;Myomorpha;Muroidea;Cricetidae;Arvicolinae;Microtus;Microtus ochrogaster
UniRef100_UPI000F736A6C	2	UPI000F736A6C	zinc finger CCCH domain-containing protein 6 isoform X2	1176	5-1093	8.9e-179	597.8	Cricetulus griseus (Chinese hamster) (Cricetulus barabensis griseus)	10029	cellular organisms;Eukaryota;Opisthokonta;Metazoa;Eumetazoa;Bilateria;Deuterostomia;Chordata;Craniata;Vertebrata;Gnathostomata;Teleostomi;Euteleostomi;Sarcopterygii;Dipnotetrapodomorpha;Tetrapoda;Amniota;Mammalia;Theria;Eutheria;Boreoeutheria;Euarchontoglires;Glires;Rodentia;Myomorpha;Muroidea;Cricetidae;Cricetinae;Cricetulus;Cricetulus griseus
UniRef100_A0A1U7Q9F7	3	A0A1U7Q9F7	zinc finger CCCH domain-containing protein 6 isoform X1	1177	5-1088	1.5e-178	597.1	Mesocricetus auratus (Golden hamster)	10036	cellular organisms;Eukaryota;Opisthokonta;Metazoa;Eumetazoa;Bilateria;Deuterostomia;Chordata;Craniata;Vertebrata;Gnathostomata;Teleostomi;Euteleostomi;Sarcopterygii;Dipnotetrapodomorpha;Tetrapoda;Amniota;Mammalia;Theria;Eutheria;Boreoeutheria;Euarchontoglires;Glires;Rodentia;Myomorpha;Muroidea;Cricetidae;Cricetinae;Mesocricetus;Mesocricetus auratus
UniRef100_A0A3Q0CN62	1	A0A3Q0CN62	zinc finger CCCH domain-containing protein 6 isoform X2	1132	5-1043	1.2e-170	571.0	Mesocricetus auratus (Golden hamster)	10036	cellular organisms;Eukaryota;Opisthokonta;Metazoa;Eumetazoa;Bilateria;Deuterostomia;Chordata;Craniata;Vertebrata;Gnathostomata;Teleostomi;Euteleostomi;Sarcopterygii;Dipnotetrapodomorpha;Tetrapoda;Amniota;Mammalia;Theria;Eutheria;Boreoeutheria;Euarchontoglires;Glires;Rodentia;Myomorpha;Muroidea;Cricetidae;Cricetinae;Mesocricetus;Mesocricetus auratus
UniRef100_Q8BYK8	1	Q8BYK8	Zinc finger CCCH domain-containing protein 6	1177	5-1089	1.5e-178	597.1	Mus musculus (Mouse)	10090	cellular organisms;Eukaryota;Opisthokonta;Metazoa;Eumetazoa;Bilateria;Deuterostomia;Chordata;Craniata;Vertebrata;Gnathostomata;Teleostomi;Euteleostomi;Sarcopterygii;Dipnotetrapodomorpha;Tetrapoda;Amniota;Mammalia;Theria;Eutheria;Boreoeutheria;Euarchontoglires;Glires;Rodentia;Myomorpha;Muroidea;Muridae;Murinae;Mus;Mus;Mus musculus
UniRef100_A2AP88	3	A2AP88	Zinc finger CCCH domain-containing protein 6	1177	5-1087	3.7e-178	595.8	Mus musculus (Mouse)	10090	cellular organisms;Eukaryota;Opisthokonta;Metazoa;Eumetazoa;Bilateria;Deuterostomia;Chordata;Craniata;Vertebrata;Gnathostomata;Teleostomi;Euteleostomi;Sarcopterygii;Dipnotetrapodomorpha;Tetrapoda;Amniota;Mammalia;Theria;Eutheria;Boreoeutheria;Euarchontoglires;Glires;Rodentia;Myomorpha;Muroidea;Muridae;Murinae;Mus;Mus;Mus musculus
UniRef100_UPI0005ABB2D8	1	UPI0005ABB2D8	zinc finger CCCH domain-containing protein 6 isoform X1	1154	92-1064	2.5e-158	530.2	Mus musculus (Mouse)	10090	cellular organisms;Eukaryota;Opisthokonta;Metazoa;Eumetazoa;Bilateria;Deuterostomia;Chordata;Craniata;Vertebrata;Gnathostomata;Teleostomi;Euteleostomi;Sarcopterygii;Dipnotetrapodomorpha;Tetrapoda;Amniota;Mammalia;Theria;Eutheria;Boreoeutheria;Euarchontoglires;Glires;Rodentia;Myomorpha;Muroidea;Muridae;Murinae;Mus;Mus;Mus musculus
UniRef100_UPI000FC62784	1	UPI000FC62784	zinc finger CCCH domain-containing protein 6 isoform X1	1172	5-1085	8.3e-177	591.3	Mus caroli (Ryukyu mouse) (Ricefield mouse)	10089	cellular organisms;Eukaryota;Opisthokonta;Metazoa;Eumetazoa;Bilateria;Deuterostomia;Chordata;Craniata;Vertebrata;Gnathostomata;Teleostomi;Euteleostomi;Sarcopterygii;Dipnotetrapodomorpha;Tetrapoda;Amniota;Mammalia;Theria;Eutheria;Boreoeutheria;Euarchontoglires;Glires;Rodentia;Myomorpha;Muroidea;Muridae;Murinae;Mus;Mus;Mus caroli
UniRef100_UPI0011116AAD	1	UPI0011116AAD	zinc finger CCCH domain-containing protein 6 isoform X2	1149	92-1062	7e-155	518.8	Mus caroli (Ryukyu mouse) (Ricefield mouse)	10089	cellular organisms;Eukaryota;Opisthokonta;Metazoa;Eumetazoa;Bilateria;Deuterostomia;Chordata;Craniata;Vertebrata;Gnathostomata;Teleostomi;Euteleostomi;Sarcopterygii;Dipnotetrapodomorpha;Tetrapoda;Amniota;Mammalia;Theria;Eutheria;Boreoeutheria;Euarchontoglires;Glires;Rodentia;Myomorpha;Muroidea;Muridae;Murinae;Mus;Mus;Mus caroli
UniRef100_UPI000A306DEB	1	UPI000A306DEB	zinc finger CCCH domain-containing protein 6 isoform X1	1176	5-1088	5.9e-178	595.1	Mus pahari (Gairdner's shrew-mouse) (Coelomys pahari)	10093	cellular organisms;Eukaryota;Opisthokonta;Metazoa;Eumetazoa;Bilateria;Deuterostomia;Chordata;Craniata;Vertebrata;Gnathostomata;Teleostomi;Euteleostomi;Sarcopterygii;Dipnotetrapodomorpha;Tetrapoda;Amniota;Mammalia;Theria;Eutheria;Boreoeutheria;Euarchontoglires;Glires;Rodentia;Myomorpha;Muroidea;Muridae;Murinae;Mus;Coelomys;Mus pahari
UniRef100_UPI0011150202	1	UPI0011150202	zinc finger CCCH domain-containing protein 6 isoform X2	1153	13-1065	2.1e-156	523.8	Mus pahari (Gairdner's shrew-mouse) (Coelomys pahari)	10093	cellular organisms;Eukaryota;Opisthokonta;Metazoa;Eumetazoa;Bilateria;Deuterostomia;Chordata;Craniata;Vertebrata;Gnathostomata;Teleostomi;Euteleostomi;Sarcopterygii;Dipnotetrapodomorpha;Tetrapoda;Amniota;Mammalia;Theria;Eutheria;Boreoeutheria;Euarchontoglires;Glires;Rodentia;Myomorpha;Muroidea;Muridae;Murinae;Mus;Coelomys;Mus pahari
UniRef100_UPI001261A897	1	UPI001261A897	zinc finger CCCH domain-containing protein 6	1176	5-1082	8.6e-178	594.6	Mastomys coucha (Southern multimammate mouse) (Praomys coucha)	35658	cellular organisms;Eukaryota;Opisthokonta;Metazoa;Eumetazoa;Bilateria;Deuterostomia;Chordata;Craniata;Vertebrata;Gnathostomata;Teleostomi;Euteleostomi;Sarcopterygii;Dipnotetrapodomorpha;Tetrapoda;Amniota;Mammalia;Theria;Eutheria;Boreoeutheria;Euarchontoglires;Glires;Rodentia;Myomorpha;Muroidea;Muridae;Murinae;Mastomys;Mastomys coucha
UniRef100_UPI00109FEA4E	1	UPI00109FEA4E	zinc finger CCCH domain-containing protein 6	1180	5-1083	2.1e-176	589.9	Grammomys surdaster	491861	cellular organisms;Eukaryota;Opisthokonta;Metazoa;Eumetazoa;Bilateria;Deuterostomia;Chordata;Craniata;Vertebrata;Gnathostomata;Teleostomi;Euteleostomi;Sarcopterygii;Dipnotetrapodomorpha;Tetrapoda;Amniota;Mammalia;Theria;Eutheria;Boreoeutheria;Euarchontoglires;Glires;Rodentia;Myomorpha;Muroidea;Muridae;Murinae;Grammomys;Grammomys surdaster
UniRef100_F1LTU5	1	F1LTU5	Zinc finger CCCH type containing 6 (Predicted)	1180	5-1092	1.9e-176	590.1	Rattus norvegicus (Rat)	10116	cellular organisms;Eukaryota;Opisthokonta;Metazoa;Eumetazoa;Bilateria;Deuterostomia;Chordata;Craniata;Vertebrata;Gnathostomata;Teleostomi;Euteleostomi;Sarcopterygii;Dipnotetrapodomorpha;Tetrapoda;Amniota;Mammalia;Theria;Eutheria;Boreoeutheria;Euarchontoglires;Glires;Rodentia;Myomorpha;Muroidea;Muridae;Murinae;Rattus;Rattus norvegicus
UniRef100_UPI0003D08BD8	1	UPI0003D08BD8	zinc finger CCCH domain-containing protein 6 isoform X1	1157	14-1069	1.1e-158	531.4	Rattus norvegicus (Rat)	10116	cellular organisms;Eukaryota;Opisthokonta;Metazoa;Eumetazoa;Bilateria;Deuterostomia;Chordata;Craniata;Vertebrata;Gnathostomata;Teleostomi;Euteleostomi;Sarcopterygii;Dipnotetrapodomorpha;Tetrapoda;Amniota;Mammalia;Theria;Eutheria;Boreoeutheria;Euarchontoglires;Glires;Rodentia;Myomorpha;Muroidea;Muridae;Murinae;Rattus;Rattus norvegicus
UniRef100_UPI000B4F19A6	1	UPI000B4F19A6	zinc finger CCCH domain-containing protein 6	1172	12-1087	4.1e-174	582.4	Meriones unguiculatus (Mongolian jird) (Mongolian gerbil)	10047	cellular organisms;Eukaryota;Opisthokonta;Metazoa;Eumetazoa;Bilateria;Deuterostomia;Chordata;Craniata;Vertebrata;Gnathostomata;Teleostomi;Euteleostomi;Sarcopterygii;Dipnotetrapodomorpha;Tetrapoda;Amniota;Mammalia;Theria;Eutheria;Boreoeutheria;Euarchontoglires;Glires;Rodentia;Myomorpha;Muroidea;Muridae;Gerbillinae;Meriones;Meriones unguiculatus
UniRef100_UPI0004ED677E	1	UPI0004ED677E	zinc finger CCCH domain-containing protein 6 isoform X3	1171	9-1099	3.2e-187	625.8	Nannospalax galili (Northern Israeli blind subterranean mole rat) (Spalax galili)	1026970	cellular organisms;Eukaryota;Opisthokonta;Metazoa;Eumetazoa;Bilateria;Deuterostomia;Chordata;Craniata;Vertebrata;Gnathostomata;Teleostomi;Euteleostomi;Sarcopterygii;Dipnotetrapodomorpha;Tetrapoda;Amniota;Mammalia;Theria;Eutheria;Boreoeutheria;Euarchontoglires;Glires;Rodentia;Myomorpha;Muroidea;Spalacidae;Spalacinae;Nannospalax;Nannospalax galili
UniRef100_UPI0004ED3D76	1	UPI0004ED3D76	zinc finger CCCH domain-containing protein 6 isoform X1	1170	9-1098	3.5e-187	625.6	Nannospalax galili (Northern Israeli blind subterranean mole rat) (Spalax galili)	1026970	cellular organisms;Eukaryota;Opisthokonta;Metazoa;Eumetazoa;Bilateria;Deuterostomia;Chordata;Craniata;Vertebrata;Gnathostomata;Teleostomi;Euteleostomi;Sarcopterygii;Dipnotetrapodomorpha;Tetrapoda;Amniota;Mammalia;Theria;Eutheria;Boreoeutheria;Euarchontoglires;Glires;Rodentia;Myomorpha;Muroidea;Spalacidae;Spalacinae;Nannospalax;Nannospalax galili
UniRef100_UPI0004ED2533	1	UPI0004ED2533	zinc finger CCCH domain-containing protein 6 isoform X2	1169	5-1097	6.6e-187	624.7	Nannospalax galili (Northern Israeli blind subterranean mole rat) (Spalax galili)	1026970	cellular organisms;Eukaryota;Opisthokonta;Metazoa;Eumetazoa;Bilateria;Deuterostomia;Chordata;Craniata;Vertebrata;Gnathostomata;Teleostomi;Euteleostomi;Sarcopterygii;Dipnotetrapodomorpha;Tetrapoda;Amniota;Mammalia;Theria;Eutheria;Boreoeutheria;Euarchontoglires;Glires;Rodentia;Myomorpha;Muroidea;Spalacidae;Spalacinae;Nannospalax;Nannospalax galili
UniRef100_UPI0003331F09	1	UPI0003331F09	zinc finger CCCH domain-containing protein 6	1179	5-1111	7.1e-188	627.9	Jaculus jaculus (Lesser Egyptian jerboa)	51337	cellular organisms;Eukaryota;Opisthokonta;Metazoa;Eumetazoa;Bilateria;Deuterostomia;Chordata;Craniata;Vertebrata;Gnathostomata;Teleostomi;Euteleostomi;Sarcopterygii;Dipnotetrapodomorpha;Tetrapoda;Amniota;Mammalia;Theria;Eutheria;Boreoeutheria;Euarchontoglires;Glires;Rodentia;Myomorpha;Dipodoidea;Dipodidae;Dipodinae;Jaculus;Jaculus jaculus
UniRef100_UPI000E560ADE	1	UPI000E560ADE	zinc finger CCCH domain-containing protein 6	1176	12-1091	9e-197	657.3	Urocitellus parryii (Arctic ground squirrel) (Spermophilus parryii)	9999	cellular organisms;Eukaryota;Opisthokonta;Metazoa;Eumetazoa;Bilateria;Deuterostomia;Chordata;Craniata;Vertebrata;Gnathostomata;Teleostomi;Euteleostomi;Sarcopterygii;Dipnotetrapodomorpha;Tetrapoda;Amniota;Mammalia;Theria;Eutheria;Boreoeutheria;Euarchontoglires;Glires;Rodentia;Sciuromorpha;Sciuridae;Xerinae;Marmotini;Urocitellus;Urocitellus parryii
UniRef100_UPI0007624922	1	UPI0007624922	zinc finger CCCH domain-containing protein 6	1172	8-1104	9.2e-196	654.0	Marmota marmota marmota (Alpine marmot)	9994	cellular organisms;Eukaryota;Opisthokonta;Metazoa;Eumetazoa;Bilateria;Deuterostomia;Chordata;Craniata;Vertebrata;Gnathostomata;Teleostomi;Euteleostomi;Sarcopterygii;Dipnotetrapodomorpha;Tetrapoda;Amniota;Mammalia;Theria;Eutheria;Boreoeutheria;Euarchontoglires;Glires;Rodentia;Sciuromorpha;Sciuridae;Xerinae;Marmotini;Marmota;Marmota marmota;Marmota marmota marmota
UniRef100_UPI000FFFC1CB	1	UPI000FFFC1CB	zinc finger CCCH domain-containing protein 6	1176	12-1103	8.5e-196	654.1	Marmota flaviventris (Yellow-bellied marmot)	93162	cellular organisms;Eukaryota;Opisthokonta;Metazoa;Eumetazoa;Bilateria;Deuterostomia;Chordata;Craniata;Vertebrata;Gnathostomata;Teleostomi;Euteleostomi;Sarcopterygii;Dipnotetrapodomorpha;Tetrapoda;Amniota;Mammalia;Theria;Eutheria;Boreoeutheria;Euarchontoglires;Glires;Rodentia;Sciuromorpha;Sciuridae;Xerinae;Marmotini;Marmota;Marmota flaviventris
UniRef100_A0A5E4CQ55	1	A0A5E4CQ55	Uncharacterized protein	890	1-822	3.9e-112	377.3	Marmota monax (Woodchuck)	9995	cellular organisms;Eukaryota;Opisthokonta;Metazoa;Eumetazoa;Bilateria;Deuterostomia;Chordata;Craniata;Vertebrata;Gnathostomata;Teleostomi;Euteleostomi;Sarcopterygii;Dipnotetrapodomorpha;Tetrapoda;Amniota;Mammalia;Theria;Eutheria;Boreoeutheria;Euarchontoglires;Glires;Rodentia;Sciuromorpha;Sciuridae;Xerinae;Marmotini;Marmota;Marmota monax
UniRef100_A0A5E4CPS1	1	A0A5E4CPS1	Uncharacterized protein	917	1-849	3.2e-141	473.6	Marmota monax (Woodchuck)	9995	cellular organisms;Eukaryota;Opisthokonta;Metazoa;Eumetazoa;Bilateria;Deuterostomia;Chordata;Craniata;Vertebrata;Gnathostomata;Teleostomi;Euteleostomi;Sarcopterygii;Dipnotetrapodomorpha;Tetrapoda;Amniota;Mammalia;Theria;Eutheria;Boreoeutheria;Euarchontoglires;Glires;Rodentia;Sciuromorpha;Sciuridae;Xerinae;Marmotini;Marmota;Marmota monax
UniRef100_I3MB37	2	I3MB37	Uncharacterized protein	1056	1-982	1.4e-165	554.1	Ictidomys tridecemlineatus (Thirteen-lined ground squirrel) (Spermophilus tridecemlineatus)	43179	cellular organisms;Eukaryota;Opisthokonta;Metazoa;Eumetazoa;Bilateria;Deuterostomia;Chordata;Craniata;Vertebrata;Gnathostomata;Teleostomi;Euteleostomi;Sarcopterygii;Dipnotetrapodomorpha;Tetrapoda;Amniota;Mammalia;Theria;Eutheria;Boreoeutheria;Euarchontoglires;Glires;Rodentia;Sciuromorpha;Sciuridae;Xerinae;Marmotini;Ictidomys;Ictidomys tridecemlineatus
UniRef100_UPI0004911931	1	UPI0004911931	zinc finger CCCH domain-containing protein 6	1193	12-1117	2.7e-199	665.7	Oryctolagus cuniculus (Rabbit)	9986	cellular organisms;Eukaryota;Opisthokonta;Metazoa;Eumetazoa;Bilateria;Deuterostomia;Chordata;Craniata;Vertebrata;Gnathostomata;Teleostomi;Euteleostomi;Sarcopterygii;Dipnotetrapodomorpha;Tetrapoda;Amniota;Mammalia;Theria;Eutheria;Boreoeutheria;Euarchontoglires;Glires;Lagomorpha;Leporidae;Oryctolagus;Oryctolagus cuniculus
UniRef100_G1T0N9	1	G1T0N9	Zinc finger CCCH-type containing 6	1176	1-1100	1.6e-196	656.6	Oryctolagus cuniculus (Rabbit)	9986	cellular organisms;Eukaryota;Opisthokonta;Metazoa;Eumetazoa;Bilateria;Deuterostomia;Chordata;Craniata;Vertebrata;Gnathostomata;Teleostomi;Euteleostomi;Sarcopterygii;Dipnotetrapodomorpha;Tetrapoda;Amniota;Mammalia;Theria;Eutheria;Boreoeutheria;Euarchontoglires;Glires;Lagomorpha;Leporidae;Oryctolagus;Oryctolagus cuniculus
UniRef100_UPI00064BD30B	1	UPI00064BD30B	zinc finger CCCH domain-containing protein 6	1125	12-1054	2.1e-169	566.8	Ochotona princeps (Southern American pika)	9978	cellular organisms;Eukaryota;Opisthokonta;Metazoa;Eumetazoa;Bilateria;Deuterostomia;Chordata;Craniata;Vertebrata;Gnathostomata;Teleostomi;Euteleostomi;Sarcopterygii;Dipnotetrapodomorpha;Tetrapoda;Amniota;Mammalia;Theria;Eutheria;Boreoeutheria;Euarchontoglires;Glires;Lagomorpha;Ochotonidae;Ochotona;Ochotona princeps
UniRef100_UPI0004D05C75	1	UPI0004D05C75	zinc finger CCCH domain-containing protein 6	1068	1-1000	1.6e-173	580.4	Galeopterus variegatus (Malayan flying lemur) (Cynocephalus variegatus)	482537	cellular organisms;Eukaryota;Opisthokonta;Metazoa;Eumetazoa;Bilateria;Deuterostomia;Chordata;Craniata;Vertebrata;Gnathostomata;Teleostomi;Euteleostomi;Sarcopterygii;Dipnotetrapodomorpha;Tetrapoda;Amniota;Mammalia;Theria;Eutheria;Boreoeutheria;Euarchontoglires;Dermoptera;Cynocephalidae;Galeopterus;Galeopterus variegatus
UniRef100_A0A384BDB4	1	A0A384BDB4	zinc finger CCCH domain-containing protein 6	1185	5-1116	1.7e-202	676.3	Balaenoptera acutorostrata scammoni (North Pacific minke whale) (Balaenoptera davidsoni)	310752	cellular organisms;Eukaryota;Opisthokonta;Metazoa;Eumetazoa;Bilateria;Deuterostomia;Chordata;Craniata;Vertebrata;Gnathostomata;Teleostomi;Euteleostomi;Sarcopterygii;Dipnotetrapodomorpha;Tetrapoda;Amniota;Mammalia;Theria;Eutheria;Boreoeutheria;Laurasiatheria;Cetartiodactyla;Cetacea;Mysticeti;Balaenopteridae;Balaenoptera;Balaenoptera acutorostrata;Balaenoptera acutorostrata scammoni
UniRef100_A0A2Y9TBZ3	2	A0A2Y9TBZ3	zinc finger CCCH domain-containing protein 6 isoform X1	1185	5-1105	6.4e-202	674.4	Physeter macrocephalus (Sperm whale) (Physeter catodon)	9755	cellular organisms;Eukaryota;Opisthokonta;Metazoa;Eumetazoa;Bilateria;Deuterostomia;Chordata;Craniata;Vertebrata;Gnathostomata;Teleostomi;Euteleostomi;Sarcopterygii;Dipnotetrapodomorpha;Tetrapoda;Amniota;Mammalia;Theria;Eutheria;Boreoeutheria;Laurasiatheria;Cetartiodactyla;Cetacea;Odontoceti;Physeteridae;Physeter;Physeter catodon
UniRef100_A0A2Y9T7H3	1	A0A2Y9T7H3	zinc finger CCCH domain-containing protein 6 isoform X3	1022	168-942	4e-101	340.9	Physeter macrocephalus (Sperm whale) (Physeter catodon)	9755	cellular organisms;Eukaryota;Opisthokonta;Metazoa;Eumetazoa;Bilateria;Deuterostomia;Chordata;Craniata;Vertebrata;Gnathostomata;Teleostomi;Euteleostomi;Sarcopterygii;Dipnotetrapodomorpha;Tetrapoda;Amniota;Mammalia;Theria;Eutheria;Boreoeutheria;Laurasiatheria;Cetartiodactyla;Cetacea;Odontoceti;Physeteridae;Physeter;Physeter catodon
UniRef100_UPI000F43F2C4	1	UPI000F43F2C4	zinc finger CCCH domain-containing protein 6 isoform X1	1188	5-1107	3e-200	668.8	Lagenorhynchus obliquidens (Pacific white-sided dolphin)	90247	cellular organisms;Eukaryota;Opisthokonta;Metazoa;Eumetazoa;Bilateria;Deuterostomia;Chordata;Craniata;Vertebrata;Gnathostomata;Teleostomi;Euteleostomi;Sarcopterygii;Dipnotetrapodomorpha;Tetrapoda;Amniota;Mammalia;Theria;Eutheria;Boreoeutheria;Laurasiatheria;Cetartiodactyla;Cetacea;Odontoceti;Delphinidae;Lagenorhynchus;Lagenorhynchus obliquidens
UniRef100_UPI000F445895	1	UPI000F445895	zinc finger CCCH domain-containing protein 6 isoform X2	1185	5-1104	4e-200	668.5	Lagenorhynchus obliquidens (Pacific white-sided dolphin)	90247	cellular organisms;Eukaryota;Opisthokonta;Metazoa;Eumetazoa;Bilateria;Deuterostomia;Chordata;Craniata;Vertebrata;Gnathostomata;Teleostomi;Euteleostomi;Sarcopterygii;Dipnotetrapodomorpha;Tetrapoda;Amniota;Mammalia;Theria;Eutheria;Boreoeutheria;Laurasiatheria;Cetartiodactyla;Cetacea;Odontoceti;Delphinidae;Lagenorhynchus;Lagenorhynchus obliquidens
UniRef100_A0A2U4B068	1	A0A2U4B068	zinc finger CCCH domain-containing protein 6 isoform X1	1188	5-1107	3.4e-200	668.7	Tursiops truncatus (Atlantic bottle-nosed dolphin) (Delphinus truncatus)	9739	cellular organisms;Eukaryota;Opisthokonta;Metazoa;Eumetazoa;Bilateria;Deuterostomia;Chordata;Craniata;Vertebrata;Gnathostomata;Teleostomi;Euteleostomi;Sarcopterygii;Dipnotetrapodomorpha;Tetrapoda;Amniota;Mammalia;Theria;Eutheria;Boreoeutheria;Laurasiatheria;Cetartiodactyla;Cetacea;Odontoceti;Delphinidae;Tursiops;Tursiops truncatus
UniRef100_A0A2U4B065	1	A0A2U4B065	zinc finger CCCH domain-containing protein 6 isoform X2	1185	5-1104	4.4e-200	668.3	Tursiops truncatus (Atlantic bottle-nosed dolphin) (Delphinus truncatus)	9739	cellular organisms;Eukaryota;Opisthokonta;Metazoa;Eumetazoa;Bilateria;Deuterostomia;Chordata;Craniata;Vertebrata;Gnathostomata;Teleostomi;Euteleostomi;Sarcopterygii;Dipnotetrapodomorpha;Tetrapoda;Amniota;Mammalia;Theria;Eutheria;Boreoeutheria;Laurasiatheria;Cetartiodactyla;Cetacea;Odontoceti;Delphinidae;Tursiops;Tursiops truncatus
UniRef100_A0A2U4B0K6	1	A0A2U4B0K6	zinc finger CCCH domain-containing protein 6 isoform X3	1145	5-1064	5.7e-158	529.0	Tursiops truncatus (Atlantic bottle-nosed dolphin) (Delphinus truncatus)	9739	cellular organisms;Eukaryota;Opisthokonta;Metazoa;Eumetazoa;Bilateria;Deuterostomia;Chordata;Craniata;Vertebrata;Gnathostomata;Teleostomi;Euteleostomi;Sarcopterygii;Dipnotetrapodomorpha;Tetrapoda;Amniota;Mammalia;Theria;Eutheria;Boreoeutheria;Laurasiatheria;Cetartiodactyla;Cetacea;Odontoceti;Delphinidae;Tursiops;Tursiops truncatus
UniRef100_UPI0002BD189F	1	UPI0002BD189F	zinc finger CCCH domain-containing protein 6	1185	5-1104	5e-200	668.1	Orcinus orca (Killer whale) (Delphinus orca)	9733	cellular organisms;Eukaryota;Opisthokonta;Metazoa;Eumetazoa;Bilateria;Deuterostomia;Chordata;Craniata;Vertebrata;Gnathostomata;Teleostomi;Euteleostomi;Sarcopterygii;Dipnotetrapodomorpha;Tetrapoda;Amniota;Mammalia;Theria;Eutheria;Boreoeutheria;Laurasiatheria;Cetartiodactyla;Cetacea;Odontoceti;Delphinidae;Orcinus;Orcinus orca
UniRef100_UPI00122EDF6A	1	UPI00122EDF6A	zinc finger CCCH domain-containing protein 6 isoform X1	1187	5-1106	4.4e-200	668.3	Globicephala melas (Long-finned pilot whale) (Globicephala melaena)	9731	cellular organisms;Eukaryota;Opisthokonta;Metazoa;Eumetazoa;Bilateria;Deuterostomia;Chordata;Craniata;Vertebrata;Gnathostomata;Teleostomi;Euteleostomi;Sarcopterygii;Dipnotetrapodomorpha;Tetrapoda;Amniota;Mammalia;Theria;Eutheria;Boreoeutheria;Laurasiatheria;Cetartiodactyla;Cetacea;Odontoceti;Delphinidae;Globicephala;Globicephala melas
UniRef100_UPI00122F1A46	1	UPI00122F1A46	zinc finger CCCH domain-containing protein 6 isoform X2	1184	5-1103	5.7e-200	667.9	Globicephala melas (Long-finned pilot whale) (Globicephala melaena)	9731	cellular organisms;Eukaryota;Opisthokonta;Metazoa;Eumetazoa;Bilateria;Deuterostomia;Chordata;Craniata;Vertebrata;Gnathostomata;Teleostomi;Euteleostomi;Sarcopterygii;Dipnotetrapodomorpha;Tetrapoda;Amniota;Mammalia;Theria;Eutheria;Boreoeutheria;Laurasiatheria;Cetartiodactyla;Cetacea;Odontoceti;Delphinidae;Globicephala;Globicephala melas
UniRef100_A0A341BDJ4	2	A0A341BDJ4	zinc finger CCCH domain-containing protein 6 isoform X1	1180	5-1099	7.2e-196	654.4	Neophocaena asiaeorientalis asiaeorientalis (Yangtze finless porpoise) (Neophocaena phocaenoides subsp. asiaeorientalis)	1706337	cellular organisms;Eukaryota;Opisthokonta;Metazoa;Eumetazoa;Bilateria;Deuterostomia;Chordata;Craniata;Vertebrata;Gnathostomata;Teleostomi;Euteleostomi;Sarcopterygii;Dipnotetrapodomorpha;Tetrapoda;Amniota;Mammalia;Theria;Eutheria;Boreoeutheria;Laurasiatheria;Cetartiodactyla;Cetacea;Odontoceti;Phocoenidae;Neophocaena;Neophocaena asiaeorientalis;Neophocaena asiaeorientalis asiaeorientalis
UniRef100_A0A341BDJ2	1	A0A341BDJ2	zinc finger CCCH domain-containing protein 6 isoform X2	1177	5-1096	9.5e-196	654.0	Neophocaena asiaeorientalis asiaeorientalis (Yangtze finless porpoise) (Neophocaena phocaenoides subsp. asiaeorientalis)	1706337	cellular organisms;Eukaryota;Opisthokonta;Metazoa;Eumetazoa;Bilateria;Deuterostomia;Chordata;Craniata;Vertebrata;Gnathostomata;Teleostomi;Euteleostomi;Sarcopterygii;Dipnotetrapodomorpha;Tetrapoda;Amniota;Mammalia;Theria;Eutheria;Boreoeutheria;Laurasiatheria;Cetartiodactyla;Cetacea;Odontoceti;Phocoenidae;Neophocaena;Neophocaena asiaeorientalis;Neophocaena asiaeorientalis asiaeorientalis
UniRef100_A0A2Y9Q6P2	1	A0A2Y9Q6P2	zinc finger CCCH domain-containing protein 6 isoform X2	1188	5-1107	3.5e-198	662.0	Delphinapterus leucas (Beluga whale)	9749	cellular organisms;Eukaryota;Opisthokonta;Metazoa;Eumetazoa;Bilateria;Deuterostomia;Chordata;Craniata;Vertebrata;Gnathostomata;Teleostomi;Euteleostomi;Sarcopterygii;Dipnotetrapodomorpha;Tetrapoda;Amniota;Mammalia;Theria;Eutheria;Boreoeutheria;Laurasiatheria;Cetartiodactyla;Cetacea;Odontoceti;Monodontidae;Delphinapterus;Delphinapterus leucas
UniRef100_A0A2Y9QH46	1	A0A2Y9QH46	zinc finger CCCH domain-containing protein 6 isoform X1	1189	5-1108	1.2e-196	656.9	Delphinapterus leucas (Beluga whale)	9749	cellular organisms;Eukaryota;Opisthokonta;Metazoa;Eumetazoa;Bilateria;Deuterostomia;Chordata;Craniata;Vertebrata;Gnathostomata;Teleostomi;Euteleostomi;Sarcopterygii;Dipnotetrapodomorpha;Tetrapoda;Amniota;Mammalia;Theria;Eutheria;Boreoeutheria;Laurasiatheria;Cetartiodactyla;Cetacea;Odontoceti;Monodontidae;Delphinapterus;Delphinapterus leucas
UniRef100_A0A2Y9QAZ4	1	A0A2Y9QAZ4	zinc finger CCCH domain-containing protein 6 isoform X3	1185	5-1104	4.6e-198	661.6	Delphinapterus leucas (Beluga whale)	9749	cellular organisms;Eukaryota;Opisthokonta;Metazoa;Eumetazoa;Bilateria;Deuterostomia;Chordata;Craniata;Vertebrata;Gnathostomata;Teleostomi;Euteleostomi;Sarcopterygii;Dipnotetrapodomorpha;Tetrapoda;Amniota;Mammalia;Theria;Eutheria;Boreoeutheria;Laurasiatheria;Cetartiodactyla;Cetacea;Odontoceti;Monodontidae;Delphinapterus;Delphinapterus leucas
UniRef100_A0A4U1EGF7	1	A0A4U1EGF7	C3H1-type domain-containing protein (Fragment)	1141	301-1060	8.2e-102	343.2	Monodon monoceros (Narwhal) (Ceratodon monodon)	40151	cellular organisms;Eukaryota;Opisthokonta;Metazoa;Eumetazoa;Bilateria;Deuterostomia;Chordata;Craniata;Vertebrata;Gnathostomata;Teleostomi;Euteleostomi;Sarcopterygii;Dipnotetrapodomorpha;Tetrapoda;Amniota;Mammalia;Theria;Eutheria;Boreoeutheria;Laurasiatheria;Cetartiodactyla;Cetacea;Odontoceti;Monodontidae;Monodon;Monodon monoceros
UniRef100_UPI0010F8DE18	1	UPI0010F8DE18	zinc finger CCCH domain-containing protein 6 isoform X2	970	37-889	1.9e-146	490.9	Monodon monoceros (Narwhal) (Ceratodon monodon)	40151	cellular organisms;Eukaryota;Opisthokonta;Metazoa;Eumetazoa;Bilateria;Deuterostomia;Chordata;Craniata;Vertebrata;Gnathostomata;Teleostomi;Euteleostomi;Sarcopterygii;Dipnotetrapodomorpha;Tetrapoda;Amniota;Mammalia;Theria;Eutheria;Boreoeutheria;Laurasiatheria;Cetartiodactyla;Cetacea;Odontoceti;Monodontidae;Monodon;Monodon monoceros
UniRef100_UPI0010F77514	1	UPI0010F77514	zinc finger CCCH domain-containing protein 6 isoform X1	1178	5-1097	4.6e-197	658.3	Monodon monoceros (Narwhal) (Ceratodon monodon)	40151	cellular organisms;Eukaryota;Opisthokonta;Metazoa;Eumetazoa;Bilateria;Deuterostomia;Chordata;Craniata;Vertebrata;Gnathostomata;Teleostomi;Euteleostomi;Sarcopterygii;Dipnotetrapodomorpha;Tetrapoda;Amniota;Mammalia;Theria;Eutheria;Boreoeutheria;Laurasiatheria;Cetartiodactyla;Cetacea;Odontoceti;Monodontidae;Monodon;Monodon monoceros
UniRef100_A0A340YE79	1	A0A340YE79	zinc finger CCCH domain-containing protein 6	1057	4-976	4.7e-173	578.9	Lipotes vexillifer (Yangtze river dolphin)	118797	cellular organisms;Eukaryota;Opisthokonta;Metazoa;Eumetazoa;Bilateria;Deuterostomia;Chordata;Craniata;Vertebrata;Gnathostomata;Teleostomi;Euteleostomi;Sarcopterygii;Dipnotetrapodomorpha;Tetrapoda;Amniota;Mammalia;Theria;Eutheria;Boreoeutheria;Laurasiatheria;Cetartiodactyla;Cetacea;Odontoceti;Lipotidae;Lipotes;Lipotes vexillifer
UniRef100_A0A4W2ENT1	1	A0A4W2ENT1	Zinc finger CCCH-type containing 6	1170	5-1104	1.9e-193	646.4	Bos indicus x Bos taurus (Hybrid cattle)	30522	cellular organisms;Eukaryota;Opisthokonta;Metazoa;Eumetazoa;Bilateria;Deuterostomia;Chordata;Craniata;Vertebrata;Gnathostomata;Teleostomi;Euteleostomi;Sarcopterygii;Dipnotetrapodomorpha;Tetrapoda;Amniota;Mammalia;Theria;Eutheria;Boreoeutheria;Laurasiatheria;Cetartiodactyla;Ruminantia;Pecora;Bovidae;Bovinae;Bos;Bos indicus x Bos taurus
UniRef100_UPI000D5383B6	1	UPI000D5383B6	zinc finger CCCH domain-containing protein 6 isoform X2	1041	115-975	5.6e-154	515.8	Bos taurus (Bovine)	9913	cellular organisms;Eukaryota;Opisthokonta;Metazoa;Eumetazoa;Bilateria;Deuterostomia;Chordata;Craniata;Vertebrata;Gnathostomata;Teleostomi;Euteleostomi;Sarcopterygii;Dipnotetrapodomorpha;Tetrapoda;Amniota;Mammalia;Theria;Eutheria;Boreoeutheria;Laurasiatheria;Cetartiodactyla;Ruminantia;Pecora;Bovidae;Bovinae;Bos;Bos taurus
UniRef100_UPI000952EA6F	1	UPI000952EA6F	zinc finger CCCH domain-containing protein 6 isoform X1	1170	5-1104	3.5e-193	645.5	Bos indicus (Zebu)	9915	cellular organisms;Eukaryota;Opisthokonta;Metazoa;Eumetazoa;Bilateria;Deuterostomia;Chordata;Craniata;Vertebrata;Gnathostomata;Teleostomi;Euteleostomi;Sarcopterygii;Dipnotetrapodomorpha;Tetrapoda;Amniota;Mammalia;Theria;Eutheria;Boreoeutheria;Laurasiatheria;Cetartiodactyla;Ruminantia;Pecora;Bovidae;Bovinae;Bos;Bos indicus
UniRef100_UPI0005776CCB	1	UPI0005776CCB	zinc finger CCCH domain-containing protein 6	1170	5-1104	7.3e-193	644.4	Bison bison bison	43346	cellular organisms;Eukaryota;Opisthokonta;Metazoa;Eumetazoa;Bilateria;Deuterostomia;Chordata;Craniata;Vertebrata;Gnathostomata;Teleostomi;Euteleostomi;Sarcopterygii;Dipnotetrapodomorpha;Tetrapoda;Amniota;Mammalia;Theria;Eutheria;Boreoeutheria;Laurasiatheria;Cetartiodactyla;Ruminantia;Pecora;Bovidae;Bovinae;Bison;Bison bison;Bison bison bison
UniRef100_UPI0009510BDE	1	UPI0009510BDE	zinc finger CCCH domain-containing protein 6 isoform X2	1041	115-975	2.7e-153	513.5	Bos indicus (Zebu)	9915	cellular organisms;Eukaryota;Opisthokonta;Metazoa;Eumetazoa;Bilateria;Deuterostomia;Chordata;Craniata;Vertebrata;Gnathostomata;Teleostomi;Euteleostomi;Sarcopterygii;Dipnotetrapodomorpha;Tetrapoda;Amniota;Mammalia;Theria;Eutheria;Boreoeutheria;Laurasiatheria;Cetartiodactyla;Ruminantia;Pecora;Bovidae;Bovinae;Bos;Bos indicus
UniRef100_UPI0006D925AE	1	UPI0006D925AE	zinc finger CCCH domain-containing protein 6	1168	10-1102	1.5e-191	640.1	Bos mutus (wild yak)	72004	cellular organisms;Eukaryota;Opisthokonta;Metazoa;Eumetazoa;Bilateria;Deuterostomia;Chordata;Craniata;Vertebrata;Gnathostomata;Teleostomi;Euteleostomi;Sarcopterygii;Dipnotetrapodomorpha;Tetrapoda;Amniota;Mammalia;Theria;Eutheria;Boreoeutheria;Laurasiatheria;Cetartiodactyla;Ruminantia;Pecora;Bovidae;Bovinae;Bos;Bos mutus
UniRef100_L8ITJ6	1	L8ITJ6	Zinc finger CCCH domain-containing protein 6 (Fragment)	1171	12-1105	4.4e-191	638.5	Bos mutus (wild yak)	72004	cellular organisms;Eukaryota;Opisthokonta;Metazoa;Eumetazoa;Bilateria;Deuterostomia;Chordata;Craniata;Vertebrata;Gnathostomata;Teleostomi;Euteleostomi;Sarcopterygii;Dipnotetrapodomorpha;Tetrapoda;Amniota;Mammalia;Theria;Eutheria;Boreoeutheria;Laurasiatheria;Cetartiodactyla;Ruminantia;Pecora;Bovidae;Bovinae;Bos;Bos mutus
UniRef100_UPI00042CAFF2	2	UPI00042CAFF2	zinc finger CCCH domain-containing protein 6 isoform X1	1201	25-1139	7.4e-193	644.4	Bubalus bubalis (Domestic water buffalo)	89462	cellular organisms;Eukaryota;Opisthokonta;Metazoa;Eumetazoa;Bilateria;Deuterostomia;Chordata;Craniata;Vertebrata;Gnathostomata;Teleostomi;Euteleostomi;Sarcopterygii;Dipnotetrapodomorpha;Tetrapoda;Amniota;Mammalia;Theria;Eutheria;Boreoeutheria;Laurasiatheria;Cetartiodactyla;Ruminantia;Pecora;Bovidae;Bovinae;Bubalus;Bubalus bubalis
UniRef100_UPI00042CB78B	1	UPI00042CB78B	zinc finger CCCH domain-containing protein 6 isoform X3	1170	5-1108	3.2e-192	642.3	Bubalus bubalis (Domestic water buffalo)	89462	cellular organisms;Eukaryota;Opisthokonta;Metazoa;Eumetazoa;Bilateria;Deuterostomia;Chordata;Craniata;Vertebrata;Gnathostomata;Teleostomi;Euteleostomi;Sarcopterygii;Dipnotetrapodomorpha;Tetrapoda;Amniota;Mammalia;Theria;Eutheria;Boreoeutheria;Laurasiatheria;Cetartiodactyla;Ruminantia;Pecora;Bovidae;Bovinae;Bubalus;Bubalus bubalis
UniRef100_UPI00042CEB62	1	UPI00042CEB62	zinc finger CCCH domain-containing protein 6 isoform X2	1172	14-1110	1.9e-192	643.0	Bubalus bubalis (Domestic water buffalo)	89462	cellular organisms;Eukaryota;Opisthokonta;Metazoa;Eumetazoa;Bilateria;Deuterostomia;Chordata;Craniata;Vertebrata;Gnathostomata;Teleostomi;Euteleostomi;Sarcopterygii;Dipnotetrapodomorpha;Tetrapoda;Amniota;Mammalia;Theria;Eutheria;Boreoeutheria;Laurasiatheria;Cetartiodactyla;Ruminantia;Pecora;Bovidae;Bovinae;Bubalus;Bubalus bubalis
UniRef100_UPI000DBC8CBB	1	UPI000DBC8CBB	zinc finger CCCH domain-containing protein 6 isoform X4	1090	35-1028	4.7e-165	552.4	Bubalus bubalis (Domestic water buffalo)	89462	cellular organisms;Eukaryota;Opisthokonta;Metazoa;Eumetazoa;Bilateria;Deuterostomia;Chordata;Craniata;Vertebrata;Gnathostomata;Teleostomi;Euteleostomi;Sarcopterygii;Dipnotetrapodomorpha;Tetrapoda;Amniota;Mammalia;Theria;Eutheria;Boreoeutheria;Laurasiatheria;Cetartiodactyla;Ruminantia;Pecora;Bovidae;Bovinae;Bubalus;Bubalus bubalis
UniRef100_UPI000DBC5562	1	UPI000DBC5562	zinc finger CCCH domain-containing protein 6 isoform X5	1072	146-1010	7.9e-154	515.3	Bubalus bubalis (Domestic water buffalo)	89462	cellular organisms;Eukaryota;Opisthokonta;Metazoa;Eumetazoa;Bilateria;Deuterostomia;Chordata;Craniata;Vertebrata;Gnathostomata;Teleostomi;Euteleostomi;Sarcopterygii;Dipnotetrapodomorpha;Tetrapoda;Amniota;Mammalia;Theria;Eutheria;Boreoeutheria;Laurasiatheria;Cetartiodactyla;Ruminantia;Pecora;Bovidae;Bovinae;Bubalus;Bubalus bubalis
UniRef100_W5PYM9	1	W5PYM9	Zinc finger CCCH-type containing 6	1171	13-1107	3.2e-191	639.0	Ovis aries (Sheep)	9940	cellular organisms;Eukaryota;Opisthokonta;Metazoa;Eumetazoa;Bilateria;Deuterostomia;Chordata;Craniata;Vertebrata;Gnathostomata;Teleostomi;Euteleostomi;Sarcopterygii;Dipnotetrapodomorpha;Tetrapoda;Amniota;Mammalia;Theria;Eutheria;Boreoeutheria;Laurasiatheria;Cetartiodactyla;Ruminantia;Pecora;Bovidae;Caprinae;Ovis;Ovis aries
UniRef100_W5PYM8	1	W5PYM8	Zinc finger CCCH-type containing 6	1170	5-1106	5.1e-191	638.3	Ovis aries (Sheep)	9940	cellular organisms;Eukaryota;Opisthokonta;Metazoa;Eumetazoa;Bilateria;Deuterostomia;Chordata;Craniata;Vertebrata;Gnathostomata;Teleostomi;Euteleostomi;Sarcopterygii;Dipnotetrapodomorpha;Tetrapoda;Amniota;Mammalia;Theria;Eutheria;Boreoeutheria;Laurasiatheria;Cetartiodactyla;Ruminantia;Pecora;Bovidae;Caprinae;Ovis;Ovis aries
UniRef100_UPI0005FAB093	2	UPI0005FAB093	zinc finger CCCH domain-containing protein 6 isoform X1	1209	154-1145	2.6e-162	543.4	Ovis aries (Sheep)	9940	cellular organisms;Eukaryota;Opisthokonta;Metazoa;Eumetazoa;Bilateria;Deuterostomia;Chordata;Craniata;Vertebrata;Gnathostomata;Teleostomi;Euteleostomi;Sarcopterygii;Dipnotetrapodomorpha;Tetrapoda;Amniota;Mammalia;Theria;Eutheria;Boreoeutheria;Laurasiatheria;Cetartiodactyla;Ruminantia;Pecora;Bovidae;Caprinae;Ovis;Ovis aries
UniRef100_UPI0008472C50	1	UPI0008472C50	LOW QUALITY PROTEIN: zinc finger CCCH domain-containing protein 6	732	5-681	5.7e-121	406.6	Capra hircus (Goat)	9925	cellular organisms;Eukaryota;Opisthokonta;Metazoa;Eumetazoa;Bilateria;Deuterostomia;Chordata;Craniata;Vertebrata;Gnathostomata;Teleostomi;Euteleostomi;Sarcopterygii;Dipnotetrapodomorpha;Tetrapoda;Amniota;Mammalia;Theria;Eutheria;Boreoeutheria;Laurasiatheria;Cetartiodactyla;Ruminantia;Pecora;Bovidae;Caprinae;Capra;Capra hircus
UniRef100_UPI0008473B0B	1	UPI0008473B0B	zinc finger CCCH domain-containing protein 6	919	1-844	5.8e-138	462.8	Capra hircus (Goat)	9925	cellular organisms;Eukaryota;Opisthokonta;Metazoa;Eumetazoa;Bilateria;Deuterostomia;Chordata;Craniata;Vertebrata;Gnathostomata;Teleostomi;Euteleostomi;Sarcopterygii;Dipnotetrapodomorpha;Tetrapoda;Amniota;Mammalia;Theria;Eutheria;Boreoeutheria;Laurasiatheria;Cetartiodactyla;Ruminantia;Pecora;Bovidae;Caprinae;Capra;Capra hircus
UniRef100_A0A452FAQ6	1	A0A452FAQ6	Uncharacterized protein	958	49-889	8.8e-127	425.8	Capra hircus (Goat)	9925	cellular organisms;Eukaryota;Opisthokonta;Metazoa;Eumetazoa;Bilateria;Deuterostomia;Chordata;Craniata;Vertebrata;Gnathostomata;Teleostomi;Euteleostomi;Sarcopterygii;Dipnotetrapodomorpha;Tetrapoda;Amniota;Mammalia;Theria;Eutheria;Boreoeutheria;Laurasiatheria;Cetartiodactyla;Ruminantia;Pecora;Bovidae;Caprinae;Capra;Capra hircus
UniRef100_UPI000A1BE7C5	1	UPI000A1BE7C5	zinc finger CCCH domain-containing protein 6 isoform X3	1100	5-1061	1.7e-179	600.2	Odocoileus virginianus texanus	9880	cellular organisms;Eukaryota;Opisthokonta;Metazoa;Eumetazoa;Bilateria;Deuterostomia;Chordata;Craniata;Vertebrata;Gnathostomata;Teleostomi;Euteleostomi;Sarcopterygii;Dipnotetrapodomorpha;Tetrapoda;Amniota;Mammalia;Theria;Eutheria;Boreoeutheria;Laurasiatheria;Cetartiodactyla;Ruminantia;Pecora;Cervidae;Odocoileinae;Odocoileus;Odocoileus virginianus;Odocoileus virginianus texanus
UniRef100_UPI000A1BDBE8	1	UPI000A1BDBE8	zinc finger CCCH domain-containing protein 6 isoform X1	1135	5-1061	1.9e-179	600.0	Odocoileus virginianus texanus	9880	cellular organisms;Eukaryota;Opisthokonta;Metazoa;Eumetazoa;Bilateria;Deuterostomia;Chordata;Craniata;Vertebrata;Gnathostomata;Teleostomi;Euteleostomi;Sarcopterygii;Dipnotetrapodomorpha;Tetrapoda;Amniota;Mammalia;Theria;Eutheria;Boreoeutheria;Laurasiatheria;Cetartiodactyla;Ruminantia;Pecora;Cervidae;Odocoileinae;Odocoileus;Odocoileus virginianus;Odocoileus virginianus texanus
UniRef100_UPI000A1BD25C	1	UPI000A1BD25C	zinc finger CCCH domain-containing protein 6 isoform X2	1129	5-1061	1.8e-179	600.1	Odocoileus virginianus texanus	9880	cellular organisms;Eukaryota;Opisthokonta;Metazoa;Eumetazoa;Bilateria;Deuterostomia;Chordata;Craniata;Vertebrata;Gnathostomata;Teleostomi;Euteleostomi;Sarcopterygii;Dipnotetrapodomorpha;Tetrapoda;Amniota;Mammalia;Theria;Eutheria;Boreoeutheria;Laurasiatheria;Cetartiodactyla;Ruminantia;Pecora;Cervidae;Odocoileinae;Odocoileus;Odocoileus virginianus;Odocoileus virginianus texanus
UniRef100_A0A5N3WJK0	1	A0A5N3WJK0	Uncharacterized protein (Fragment)	1135	1-1072	9.3e-170	568.0	Muntiacus muntjak (Barking deer) (Indian muntjac)	9888	cellular organisms;Eukaryota;Opisthokonta;Metazoa;Eumetazoa;Bilateria;Deuterostomia;Chordata;Craniata;Vertebrata;Gnathostomata;Teleostomi;Euteleostomi;Sarcopterygii;Dipnotetrapodomorpha;Tetrapoda;Amniota;Mammalia;Theria;Eutheria;Boreoeutheria;Laurasiatheria;Cetartiodactyla;Ruminantia;Pecora;Cervidae;Muntiacinae;Muntiacus;Muntiacus muntjak
UniRef100_A0A5J5MMX0	1	A0A5J5MMX0	Uncharacterized protein (Fragment)	1135	1-1072	3.6e-169	566.0	Muntiacus reevesi (Reeves' muntjac) (Cervus reevesi)	9886	cellular organisms;Eukaryota;Opisthokonta;Metazoa;Eumetazoa;Bilateria;Deuterostomia;Chordata;Craniata;Vertebrata;Gnathostomata;Teleostomi;Euteleostomi;Sarcopterygii;Dipnotetrapodomorpha;Tetrapoda;Amniota;Mammalia;Theria;Eutheria;Boreoeutheria;Laurasiatheria;Cetartiodactyla;Ruminantia;Pecora;Cervidae;Muntiacinae;Muntiacus;Muntiacus reevesi
UniRef100_A0A287AXB3	2	A0A287AXB3	Zinc finger CCCH-type containing 6	1183	5-1115	3.8e-199	665.2	Sus scrofa (Pig)	9823	cellular organisms;Eukaryota;Opisthokonta;Metazoa;Eumetazoa;Bilateria;Deuterostomia;Chordata;Craniata;Vertebrata;Gnathostomata;Teleostomi;Euteleostomi;Sarcopterygii;Dipnotetrapodomorpha;Tetrapoda;Amniota;Mammalia;Theria;Eutheria;Boreoeutheria;Laurasiatheria;Cetartiodactyla;Suina;Suidae;Sus;Sus scrofa
UniRef100_A0A4X1VB97	1	A0A4X1VB97	Uncharacterized protein	1153	5-1115	3.5e-199	665.3	Sus scrofa (Pig)	9823	cellular organisms;Eukaryota;Opisthokonta;Metazoa;Eumetazoa;Bilateria;Deuterostomia;Chordata;Craniata;Vertebrata;Gnathostomata;Teleostomi;Euteleostomi;Sarcopterygii;Dipnotetrapodomorpha;Tetrapoda;Amniota;Mammalia;Theria;Eutheria;Boreoeutheria;Laurasiatheria;Cetartiodactyla;Suina;Suidae;Sus;Sus scrofa
UniRef100_A0A287AK61	1	A0A287AK61	Zinc finger CCCH-type containing 6	1105	5-1037	1.7e-194	649.8	Sus scrofa (Pig)	9823	cellular organisms;Eukaryota;Opisthokonta;Metazoa;Eumetazoa;Bilateria;Deuterostomia;Chordata;Craniata;Vertebrata;Gnathostomata;Teleostomi;Euteleostomi;Sarcopterygii;Dipnotetrapodomorpha;Tetrapoda;Amniota;Mammalia;Theria;Eutheria;Boreoeutheria;Laurasiatheria;Cetartiodactyla;Suina;Suidae;Sus;Sus scrofa
UniRef100_A0A4X1VAZ6	1	A0A4X1VAZ6	Uncharacterized protein	1132	82-1064	1.9e-174	583.5	Sus scrofa (Pig)	9823	cellular organisms;Eukaryota;Opisthokonta;Metazoa;Eumetazoa;Bilateria;Deuterostomia;Chordata;Craniata;Vertebrata;Gnathostomata;Teleostomi;Euteleostomi;Sarcopterygii;Dipnotetrapodomorpha;Tetrapoda;Amniota;Mammalia;Theria;Eutheria;Boreoeutheria;Laurasiatheria;Cetartiodactyla;Suina;Suidae;Sus;Sus scrofa
UniRef100_UPI0012B0A95A	2	UPI0012B0A95A	zinc finger CCCH domain-containing protein 6 isoform X1	1180	6-1103	6e-196	654.6	Vicugna pacos (Alpaca) (Lama pacos)	30538	cellular organisms;Eukaryota;Opisthokonta;Metazoa;Eumetazoa;Bilateria;Deuterostomia;Chordata;Craniata;Vertebrata;Gnathostomata;Teleostomi;Euteleostomi;Sarcopterygii;Dipnotetrapodomorpha;Tetrapoda;Amniota;Mammalia;Theria;Eutheria;Boreoeutheria;Laurasiatheria;Cetartiodactyla;Tylopoda;Camelidae;Vicugna;Vicugna pacos
UniRef100_UPI0007380877	1	UPI0007380877	zinc finger CCCH domain-containing protein 6 isoform X2	1177	6-1100	8e-196	654.2	Vicugna pacos (Alpaca) (Lama pacos)	30538	cellular organisms;Eukaryota;Opisthokonta;Metazoa;Eumetazoa;Bilateria;Deuterostomia;Chordata;Craniata;Vertebrata;Gnathostomata;Teleostomi;Euteleostomi;Sarcopterygii;Dipnotetrapodomorpha;Tetrapoda;Amniota;Mammalia;Theria;Eutheria;Boreoeutheria;Laurasiatheria;Cetartiodactyla;Tylopoda;Camelidae;Vicugna;Vicugna pacos
UniRef100_UPI0012AF3588	1	UPI0012AF3588	zinc finger CCCH domain-containing protein 6 isoform X3	1128	6-1051	1.4e-187	627.0	Vicugna pacos (Alpaca) (Lama pacos)	30538	cellular organisms;Eukaryota;Opisthokonta;Metazoa;Eumetazoa;Bilateria;Deuterostomia;Chordata;Craniata;Vertebrata;Gnathostomata;Teleostomi;Euteleostomi;Sarcopterygii;Dipnotetrapodomorpha;Tetrapoda;Amniota;Mammalia;Theria;Eutheria;Boreoeutheria;Laurasiatheria;Cetartiodactyla;Tylopoda;Camelidae;Vicugna;Vicugna pacos
UniRef100_UPI001263DD2B	1	UPI001263DD2B	zinc finger CCCH domain-containing protein 6 isoform X2	1180	12-1104	4e-195	651.9	Camelus dromedarius (Dromedary) (Arabian camel)	9838	cellular organisms;Eukaryota;Opisthokonta;Metazoa;Eumetazoa;Bilateria;Deuterostomia;Chordata;Craniata;Vertebrata;Gnathostomata;Teleostomi;Euteleostomi;Sarcopterygii;Dipnotetrapodomorpha;Tetrapoda;Amniota;Mammalia;Theria;Eutheria;Boreoeutheria;Laurasiatheria;Cetartiodactyla;Tylopoda;Camelidae;Camelus;Camelus dromedarius
UniRef100_UPI001262FAA0	1	UPI001262FAA0	zinc finger CCCH domain-containing protein 6 isoform X3	1177	5-1101	5.6e-195	651.4	Camelus dromedarius (Dromedary) (Arabian camel)	9838	cellular organisms;Eukaryota;Opisthokonta;Metazoa;Eumetazoa;Bilateria;Deuterostomia;Chordata;Craniata;Vertebrata;Gnathostomata;Teleostomi;Euteleostomi;Sarcopterygii;Dipnotetrapodomorpha;Tetrapoda;Amniota;Mammalia;Theria;Eutheria;Boreoeutheria;Laurasiatheria;Cetartiodactyla;Tylopoda;Camelidae;Camelus;Camelus dromedarius
UniRef100_UPI0012639FAD	1	UPI0012639FAD	zinc finger CCCH domain-containing protein 6 isoform X1	1180	5-1104	4.1e-195	651.9	Camelus dromedarius (Dromedary) (Arabian camel)	9838	cellular organisms;Eukaryota;Opisthokonta;Metazoa;Eumetazoa;Bilateria;Deuterostomia;Chordata;Craniata;Vertebrata;Gnathostomata;Teleostomi;Euteleostomi;Sarcopterygii;Dipnotetrapodomorpha;Tetrapoda;Amniota;Mammalia;Theria;Eutheria;Boreoeutheria;Laurasiatheria;Cetartiodactyla;Tylopoda;Camelidae;Camelus;Camelus dromedarius
UniRef100_UPI001262ECC8	1	UPI001262ECC8	zinc finger CCCH domain-containing protein 6 isoform X4	1128	5-1052	5.1e-187	625.1	Camelus dromedarius (Dromedary) (Arabian camel)	9838	cellular organisms;Eukaryota;Opisthokonta;Metazoa;Eumetazoa;Bilateria;Deuterostomia;Chordata;Craniata;Vertebrata;Gnathostomata;Teleostomi;Euteleostomi;Sarcopterygii;Dipnotetrapodomorpha;Tetrapoda;Amniota;Mammalia;Theria;Eutheria;Boreoeutheria;Laurasiatheria;Cetartiodactyla;Tylopoda;Camelidae;Camelus;Camelus dromedarius
UniRef100_UPI00057B766A	1	UPI00057B766A	LOW QUALITY PROTEIN: zinc finger CCCH domain-containing protein 6	834	14-831	1.6e-133	448.1	Camelus bactrianus (Bactrian camel)	9837	cellular organisms;Eukaryota;Opisthokonta;Metazoa;Eumetazoa;Bilateria;Deuterostomia;Chordata;Craniata;Vertebrata;Gnathostomata;Teleostomi;Euteleostomi;Sarcopterygii;Dipnotetrapodomorpha;Tetrapoda;Amniota;Mammalia;Theria;Eutheria;Boreoeutheria;Laurasiatheria;Cetartiodactyla;Tylopoda;Camelidae;Camelus;Camelus bactrianus
UniRef100_UPI000703E3C1	1	UPI000703E3C1	zinc finger CCCH domain-containing protein 6 isoform X1	1177	12-1101	5.4e-194	648.2	Camelus ferus (Wild bactrian camel) (Camelus bactrianus ferus)	419612	cellular organisms;Eukaryota;Opisthokonta;Metazoa;Eumetazoa;Bilateria;Deuterostomia;Chordata;Craniata;Vertebrata;Gnathostomata;Teleostomi;Euteleostomi;Sarcopterygii;Dipnotetrapodomorpha;Tetrapoda;Amniota;Mammalia;Theria;Eutheria;Boreoeutheria;Laurasiatheria;Cetartiodactyla;Tylopoda;Camelidae;Camelus;Camelus ferus
UniRef100_UPI00070403C2	1	UPI00070403C2	zinc finger CCCH domain-containing protein 6 isoform X2	1060	1-984	6.3e-163	545.4	Camelus ferus (Wild bactrian camel) (Camelus bactrianus ferus)	419612	cellular organisms;Eukaryota;Opisthokonta;Metazoa;Eumetazoa;Bilateria;Deuterostomia;Chordata;Craniata;Vertebrata;Gnathostomata;Teleostomi;Euteleostomi;Sarcopterygii;Dipnotetrapodomorpha;Tetrapoda;Amniota;Mammalia;Theria;Eutheria;Boreoeutheria;Laurasiatheria;Cetartiodactyla;Tylopoda;Camelidae;Camelus;Camelus ferus
UniRef100_UPI000D184D07	1	UPI000D184D07	zinc finger CCCH domain-containing protein 6	1281	48-1208	1.9e-198	662.9	Desmodus rotundus (Vampire bat)	9430	cellular organisms;Eukaryota;Opisthokonta;Metazoa;Eumetazoa;Bilateria;Deuterostomia;Chordata;Craniata;Vertebrata;Gnathostomata;Teleostomi;Euteleostomi;Sarcopterygii;Dipnotetrapodomorpha;Tetrapoda;Amniota;Mammalia;Theria;Eutheria;Boreoeutheria;Laurasiatheria;Chiroptera;Microchiroptera;Phyllostomidae;Desmodontinae;Desmodus;Desmodus rotundus
UniRef100_K9IVV2	1	K9IVV2	Putative polyadenylation factor i complex subunit yth1 cpsf subunit (Fragment)	1177	4-1104	1.5e-197	659.9	Desmodus rotundus (Vampire bat)	9430	cellular organisms;Eukaryota;Opisthokonta;Metazoa;Eumetazoa;Bilateria;Deuterostomia;Chordata;Craniata;Vertebrata;Gnathostomata;Teleostomi;Euteleostomi;Sarcopterygii;Dipnotetrapodomorpha;Tetrapoda;Amniota;Mammalia;Theria;Eutheria;Boreoeutheria;Laurasiatheria;Chiroptera;Microchiroptera;Phyllostomidae;Desmodontinae;Desmodus;Desmodus rotundus
UniRef100_K9IUQ5	1	K9IUQ5	Putative polyadenylation factor i complex subunit yth1 cpsf subunit (Fragment)	1169	4-1096	2.9e-196	655.6	Desmodus rotundus (Vampire bat)	9430	cellular organisms;Eukaryota;Opisthokonta;Metazoa;Eumetazoa;Bilateria;Deuterostomia;Chordata;Craniata;Vertebrata;Gnathostomata;Teleostomi;Euteleostomi;Sarcopterygii;Dipnotetrapodomorpha;Tetrapoda;Amniota;Mammalia;Theria;Eutheria;Boreoeutheria;Laurasiatheria;Chiroptera;Microchiroptera;Phyllostomidae;Desmodontinae;Desmodus;Desmodus rotundus
UniRef100_K9IVS8	1	K9IVS8	Putative polyadenylation factor i complex subunit yth1 cpsf subunit (Fragment)	1110	133-1037	1.1e-160	538.0	Desmodus rotundus (Vampire bat)	9430	cellular organisms;Eukaryota;Opisthokonta;Metazoa;Eumetazoa;Bilateria;Deuterostomia;Chordata;Craniata;Vertebrata;Gnathostomata;Teleostomi;Euteleostomi;Sarcopterygii;Dipnotetrapodomorpha;Tetrapoda;Amniota;Mammalia;Theria;Eutheria;Boreoeutheria;Laurasiatheria;Chiroptera;Microchiroptera;Phyllostomidae;Desmodontinae;Desmodus;Desmodus rotundus
UniRef100_UPI00105B0211	1	UPI00105B0211	zinc finger CCCH domain-containing protein 6	1184	12-1111	5.6e-196	654.7	Phyllostomus discolor (pale spear-nosed bat)	89673	cellular organisms;Eukaryota;Opisthokonta;Metazoa;Eumetazoa;Bilateria;Deuterostomia;Chordata;Craniata;Vertebrata;Gnathostomata;Teleostomi;Euteleostomi;Sarcopterygii;Dipnotetrapodomorpha;Tetrapoda;Amniota;Mammalia;Theria;Eutheria;Boreoeutheria;Laurasiatheria;Chiroptera;Microchiroptera;Phyllostomidae;Phyllostominae;Phyllostomus;Phyllostomus discolor
UniRef100_UPI0007A72D00	1	UPI0007A72D00	zinc finger CCCH domain-containing protein 6	1237	48-1160	5.4e-193	644.8	Miniopterus natalensis (Natal long-fingered bat) (Miniopterus schreibersii natalensis)	291302	cellular organisms;Eukaryota;Opisthokonta;Metazoa;Eumetazoa;Bilateria;Deuterostomia;Chordata;Craniata;Vertebrata;Gnathostomata;Teleostomi;Euteleostomi;Sarcopterygii;Dipnotetrapodomorpha;Tetrapoda;Amniota;Mammalia;Theria;Eutheria;Boreoeutheria;Laurasiatheria;Chiroptera;Microchiroptera;Vespertilionidae;Miniopterinae;Miniopterus;Miniopterus natalensis
UniRef100_UPI0007679CCA	1	UPI0007679CCA	zinc finger CCCH domain-containing protein 6	1227	51-1146	3.7e-192	642.1	Myotis davidii (David's myotis)	225400	cellular organisms;Eukaryota;Opisthokonta;Metazoa;Eumetazoa;Bilateria;Deuterostomia;Chordata;Craniata;Vertebrata;Gnathostomata;Teleostomi;Euteleostomi;Sarcopterygii;Dipnotetrapodomorpha;Tetrapoda;Amniota;Mammalia;Theria;Eutheria;Boreoeutheria;Laurasiatheria;Chiroptera;Microchiroptera;Vespertilionidae;Myotis;Myotis davidii
UniRef100_L5LWC8	1	L5LWC8	Zinc finger CCCH domain-containing protein 6	1248	74-1167	1.5e-190	636.8	Myotis davidii (David's myotis)	225400	cellular organisms;Eukaryota;Opisthokonta;Metazoa;Eumetazoa;Bilateria;Deuterostomia;Chordata;Craniata;Vertebrata;Gnathostomata;Teleostomi;Euteleostomi;Sarcopterygii;Dipnotetrapodomorpha;Tetrapoda;Amniota;Mammalia;Theria;Eutheria;Boreoeutheria;Laurasiatheria;Chiroptera;Microchiroptera;Vespertilionidae;Myotis;Myotis davidii
UniRef100_UPI000703D787	1	UPI000703D787	zinc finger CCCH domain-containing protein 6	1171	10-1090	6.2e-185	618.2	Myotis brandtii (Brandt's bat)	109478	cellular organisms;Eukaryota;Opisthokonta;Metazoa;Eumetazoa;Bilateria;Deuterostomia;Chordata;Craniata;Vertebrata;Gnathostomata;Teleostomi;Euteleostomi;Sarcopterygii;Dipnotetrapodomorpha;Tetrapoda;Amniota;Mammalia;Theria;Eutheria;Boreoeutheria;Laurasiatheria;Chiroptera;Microchiroptera;Vespertilionidae;Myotis;Myotis brandtii
UniRef100_S7NNY1	1	S7NNY1	Zinc finger CCCH domain-containing protein 6	1193	16-1112	3.8e-183	612.3	Myotis brandtii (Brandt's bat)	109478	cellular organisms;Eukaryota;Opisthokonta;Metazoa;Eumetazoa;Bilateria;Deuterostomia;Chordata;Craniata;Vertebrata;Gnathostomata;Teleostomi;Euteleostomi;Sarcopterygii;Dipnotetrapodomorpha;Tetrapoda;Amniota;Mammalia;Theria;Eutheria;Boreoeutheria;Laurasiatheria;Chiroptera;Microchiroptera;Vespertilionidae;Myotis;Myotis brandtii
UniRef100_UPI000CCBD817	1	UPI000CCBD817	zinc finger CCCH domain-containing protein 6 isoform X3	1189	7-1108	8e-185	617.8	Myotis lucifugus (Little brown bat)	59463	cellular organisms;Eukaryota;Opisthokonta;Metazoa;Eumetazoa;Bilateria;Deuterostomia;Chordata;Craniata;Vertebrata;Gnathostomata;Teleostomi;Euteleostomi;Sarcopterygii;Dipnotetrapodomorpha;Tetrapoda;Amniota;Mammalia;Theria;Eutheria;Boreoeutheria;Laurasiatheria;Chiroptera;Microchiroptera;Vespertilionidae;Myotis;Myotis lucifugus
UniRef100_UPI000CCC6E9E	1	UPI000CCC6E9E	zinc finger CCCH domain-containing protein 6 isoform X2	1191	12-1110	1.7e-182	610.1	Myotis lucifugus (Little brown bat)	59463	cellular organisms;Eukaryota;Opisthokonta;Metazoa;Eumetazoa;Bilateria;Deuterostomia;Chordata;Craniata;Vertebrata;Gnathostomata;Teleostomi;Euteleostomi;Sarcopterygii;Dipnotetrapodomorpha;Tetrapoda;Amniota;Mammalia;Theria;Eutheria;Boreoeutheria;Laurasiatheria;Chiroptera;Microchiroptera;Vespertilionidae;Myotis;Myotis lucifugus
UniRef100_UPI000CCBED60	2	UPI000CCBED60	zinc finger CCCH domain-containing protein 6 isoform X1	1209	7-1128	8.3e-183	611.1	Myotis lucifugus (Little brown bat)	59463	cellular organisms;Eukaryota;Opisthokonta;Metazoa;Eumetazoa;Bilateria;Deuterostomia;Chordata;Craniata;Vertebrata;Gnathostomata;Teleostomi;Euteleostomi;Sarcopterygii;Dipnotetrapodomorpha;Tetrapoda;Amniota;Mammalia;Theria;Eutheria;Boreoeutheria;Laurasiatheria;Chiroptera;Microchiroptera;Vespertilionidae;Myotis;Myotis lucifugus
UniRef100_G1P3G5	1	G1P3G5	Zinc finger CCCH-type containing 6	1171	12-1090	1.8e-182	610.0	Myotis lucifugus (Little brown bat)	59463	cellular organisms;Eukaryota;Opisthokonta;Metazoa;Eumetazoa;Bilateria;Deuterostomia;Chordata;Craniata;Vertebrata;Gnathostomata;Teleostomi;Euteleostomi;Sarcopterygii;Dipnotetrapodomorpha;Tetrapoda;Amniota;Mammalia;Theria;Eutheria;Boreoeutheria;Laurasiatheria;Chiroptera;Microchiroptera;Vespertilionidae;Myotis;Myotis lucifugus
UniRef100_UPI000CCBD744	1	UPI000CCBD744	zinc finger CCCH domain-containing protein 6 isoform X5	1052	129-971	1.1e-146	491.7	Myotis lucifugus (Little brown bat)	59463	cellular organisms;Eukaryota;Opisthokonta;Metazoa;Eumetazoa;Bilateria;Deuterostomia;Chordata;Craniata;Vertebrata;Gnathostomata;Teleostomi;Euteleostomi;Sarcopterygii;Dipnotetrapodomorpha;Tetrapoda;Amniota;Mammalia;Theria;Eutheria;Boreoeutheria;Laurasiatheria;Chiroptera;Microchiroptera;Vespertilionidae;Myotis;Myotis lucifugus
UniRef100_UPI00101A8DC3	1	UPI00101A8DC3	zinc finger CCCH domain-containing protein 6 isoform X1	1223	32-1145	6.3e-187	624.8	Eptesicus fuscus (Big brown bat) (Vespertilio fuscus)	29078	cellular organisms;Eukaryota;Opisthokonta;Metazoa;Eumetazoa;Bilateria;Deuterostomia;Chordata;Craniata;Vertebrata;Gnathostomata;Teleostomi;Euteleostomi;Sarcopterygii;Dipnotetrapodomorpha;Tetrapoda;Amniota;Mammalia;Theria;Eutheria;Boreoeutheria;Laurasiatheria;Chiroptera;Microchiroptera;Vespertilionidae;Eptesicus;Eptesicus fuscus
UniRef100_UPI00101A4FC5	1	UPI00101A4FC5	zinc finger CCCH domain-containing protein 6 isoform X2	1175	12-1097	5.7e-186	621.6	Eptesicus fuscus (Big brown bat) (Vespertilio fuscus)	29078	cellular organisms;Eukaryota;Opisthokonta;Metazoa;Eumetazoa;Bilateria;Deuterostomia;Chordata;Craniata;Vertebrata;Gnathostomata;Teleostomi;Euteleostomi;Sarcopterygii;Dipnotetrapodomorpha;Tetrapoda;Amniota;Mammalia;Theria;Eutheria;Boreoeutheria;Laurasiatheria;Chiroptera;Microchiroptera;Vespertilionidae;Eptesicus;Eptesicus fuscus
UniRef100_UPI000788E519	1	UPI000788E519	zinc finger CCCH domain-containing protein 6 isoform X1	1169	12-1099	3.2e-196	655.5	Rousettus aegyptiacus (Egyptian rousette) (Egyptian fruit bat)	9407	cellular organisms;Eukaryota;Opisthokonta;Metazoa;Eumetazoa;Bilateria;Deuterostomia;Chordata;Craniata;Vertebrata;Gnathostomata;Teleostomi;Euteleostomi;Sarcopterygii;Dipnotetrapodomorpha;Tetrapoda;Amniota;Mammalia;Theria;Eutheria;Boreoeutheria;Laurasiatheria;Chiroptera;Megachiroptera;Pteropodidae;Pteropodinae;Rousettus;Rousettus aegyptiacus
UniRef100_UPI00078812F4	1	UPI00078812F4	zinc finger CCCH domain-containing protein 6 isoform X2	997	23-927	5e-150	502.7	Rousettus aegyptiacus (Egyptian rousette) (Egyptian fruit bat)	9407	cellular organisms;Eukaryota;Opisthokonta;Metazoa;Eumetazoa;Bilateria;Deuterostomia;Chordata;Craniata;Vertebrata;Gnathostomata;Teleostomi;Euteleostomi;Sarcopterygii;Dipnotetrapodomorpha;Tetrapoda;Amniota;Mammalia;Theria;Eutheria;Boreoeutheria;Laurasiatheria;Chiroptera;Megachiroptera;Pteropodidae;Pteropodinae;Rousettus;Rousettus aegyptiacus
UniRef100_UPI000D532A01	2	UPI000D532A01	zinc finger CCCH domain-containing protein 6 isoform X1	1176	19-1100	4.1e-194	648.5	Pteropus alecto (Black flying fox)	9402	cellular organisms;Eukaryota;Opisthokonta;Metazoa;Eumetazoa;Bilateria;Deuterostomia;Chordata;Craniata;Vertebrata;Gnathostomata;Teleostomi;Euteleostomi;Sarcopterygii;Dipnotetrapodomorpha;Tetrapoda;Amniota;Mammalia;Theria;Eutheria;Boreoeutheria;Laurasiatheria;Chiroptera;Megachiroptera;Pteropodidae;Pteropodinae;Pteropus;Pteropus alecto
UniRef100_UPI000D536042	1	UPI000D536042	zinc finger CCCH domain-containing protein 6 isoform X2	1135	19-1059	2.9e-178	596.1	Pteropus alecto (Black flying fox)	9402	cellular organisms;Eukaryota;Opisthokonta;Metazoa;Eumetazoa;Bilateria;Deuterostomia;Chordata;Craniata;Vertebrata;Gnathostomata;Teleostomi;Euteleostomi;Sarcopterygii;Dipnotetrapodomorpha;Tetrapoda;Amniota;Mammalia;Theria;Eutheria;Boreoeutheria;Laurasiatheria;Chiroptera;Megachiroptera;Pteropodidae;Pteropodinae;Pteropus;Pteropus alecto
UniRef100_UPI000C879BAE	1	UPI000C879BAE	zinc finger CCCH domain-containing protein 6	1138	19-1062	7.2e-176	588.2	Pteropus vampyrus (Large flying fox)	132908	cellular organisms;Eukaryota;Opisthokonta;Metazoa;Eumetazoa;Bilateria;Deuterostomia;Chordata;Craniata;Vertebrata;Gnathostomata;Teleostomi;Euteleostomi;Sarcopterygii;Dipnotetrapodomorpha;Tetrapoda;Amniota;Mammalia;Theria;Eutheria;Boreoeutheria;Laurasiatheria;Chiroptera;Megachiroptera;Pteropodidae;Pteropodinae;Pteropus;Pteropus vampyrus
UniRef100_UPI00093EE173	1	UPI00093EE173	zinc finger CCCH domain-containing protein 6 isoform X1	1169	12-1107	1.7e-180	603.5	Hipposideros armiger (great roundleaf bat)	186990	cellular organisms;Eukaryota;Opisthokonta;Metazoa;Eumetazoa;Bilateria;Deuterostomia;Chordata;Craniata;Vertebrata;Gnathostomata;Teleostomi;Euteleostomi;Sarcopterygii;Dipnotetrapodomorpha;Tetrapoda;Amniota;Mammalia;Theria;Eutheria;Boreoeutheria;Laurasiatheria;Chiroptera;Microchiroptera;Hipposideridae;Hipposideros;Hipposideros armiger
UniRef100_UPI00093E5042	1	UPI00093E5042	zinc finger CCCH domain-containing protein 6 isoform X2	707	12-693	1.8e-120	404.9	Hipposideros armiger (great roundleaf bat)	186990	cellular organisms;Eukaryota;Opisthokonta;Metazoa;Eumetazoa;Bilateria;Deuterostomia;Chordata;Craniata;Vertebrata;Gnathostomata;Teleostomi;Euteleostomi;Sarcopterygii;Dipnotetrapodomorpha;Tetrapoda;Amniota;Mammalia;Theria;Eutheria;Boreoeutheria;Laurasiatheria;Chiroptera;Microchiroptera;Hipposideridae;Hipposideros;Hipposideros armiger
UniRef100_UPI0003343E76	1	UPI0003343E76	zinc finger CCCH domain-containing protein 6	1170	5-1089	6.1e-194	648.0	Condylura cristata (Star-nosed mole)	143302	cellular organisms;Eukaryota;Opisthokonta;Metazoa;Eumetazoa;Bilateria;Deuterostomia;Chordata;Craniata;Vertebrata;Gnathostomata;Teleostomi;Euteleostomi;Sarcopterygii;Dipnotetrapodomorpha;Tetrapoda;Amniota;Mammalia;Theria;Eutheria;Boreoeutheria;Laurasiatheria;Eulipotyphla;Talpidae;Condylura;Condylura cristata
UniRef100_UPI0006496EEA	1	UPI0006496EEA	zinc finger CCCH domain-containing protein 6	1172	5-1099	5.4e-194	648.1	Sorex araneus (Eurasian common shrew) (European shrew)	42254	cellular organisms;Eukaryota;Opisthokonta;Metazoa;Eumetazoa;Bilateria;Deuterostomia;Chordata;Craniata;Vertebrata;Gnathostomata;Teleostomi;Euteleostomi;Sarcopterygii;Dipnotetrapodomorpha;Tetrapoda;Amniota;Mammalia;Theria;Eutheria;Boreoeutheria;Laurasiatheria;Eulipotyphla;Soricidae;Soricinae;Sorex;Sorex araneus
UniRef100_UPI0007662343	1	UPI0007662343	zinc finger CCCH domain-containing protein 6	1176	8-1108	7.2e-201	670.9	Panthera tigris altaica (Siberian tiger)	74533	cellular organisms;Eukaryota;Opisthokonta;Metazoa;Eumetazoa;Bilateria;Deuterostomia;Chordata;Craniata;Vertebrata;Gnathostomata;Teleostomi;Euteleostomi;Sarcopterygii;Dipnotetrapodomorpha;Tetrapoda;Amniota;Mammalia;Theria;Eutheria;Boreoeutheria;Laurasiatheria;Carnivora;Feliformia;Felidae;Pantherinae;Panthera;Panthera tigris;Panthera tigris altaica
UniRef100_UPI000904CD35	1	UPI000904CD35	zinc finger CCCH domain-containing protein 6 isoform X2	1169	5-1101	2.3e-200	669.2	Panthera pardus (Leopard) (Felis pardus)	9691	cellular organisms;Eukaryota;Opisthokonta;Metazoa;Eumetazoa;Bilateria;Deuterostomia;Chordata;Craniata;Vertebrata;Gnathostomata;Teleostomi;Euteleostomi;Sarcopterygii;Dipnotetrapodomorpha;Tetrapoda;Amniota;Mammalia;Theria;Eutheria;Boreoeutheria;Laurasiatheria;Carnivora;Feliformia;Felidae;Pantherinae;Panthera;Panthera pardus
UniRef100_UPI000905BAB0	1	UPI000905BAB0	zinc finger CCCH domain-containing protein 6 isoform X1	1172	5-1104	1.8e-200	669.6	Panthera pardus (Leopard) (Felis pardus)	9691	cellular organisms;Eukaryota;Opisthokonta;Metazoa;Eumetazoa;Bilateria;Deuterostomia;Chordata;Craniata;Vertebrata;Gnathostomata;Teleostomi;Euteleostomi;Sarcopterygii;Dipnotetrapodomorpha;Tetrapoda;Amniota;Mammalia;Theria;Eutheria;Boreoeutheria;Laurasiatheria;Carnivora;Feliformia;Felidae;Pantherinae;Panthera;Panthera pardus
UniRef100_UPI00094869AC	1	UPI00094869AC	zinc finger CCCH domain-containing protein 6 isoform X1	1172	5-1104	8.3e-201	670.7	Felis catus (Cat) (Felis silvestris catus)	9685	cellular organisms;Eukaryota;Opisthokonta;Metazoa;Eumetazoa;Bilateria;Deuterostomia;Chordata;Craniata;Vertebrata;Gnathostomata;Teleostomi;Euteleostomi;Sarcopterygii;Dipnotetrapodomorpha;Tetrapoda;Amniota;Mammalia;Theria;Eutheria;Boreoeutheria;Laurasiatheria;Carnivora;Feliformia;Felidae;Felinae;Felis;Felis catus
UniRef100_M3W8Y7	1	M3W8Y7	Zinc finger CCCH-type containing 6	1169	5-1101	1.1e-200	670.3	Felis catus (Cat) (Felis silvestris catus)	9685	cellular organisms;Eukaryota;Opisthokonta;Metazoa;Eumetazoa;Bilateria;Deuterostomia;Chordata;Craniata;Vertebrata;Gnathostomata;Teleostomi;Euteleostomi;Sarcopterygii;Dipnotetrapodomorpha;Tetrapoda;Amniota;Mammalia;Theria;Eutheria;Boreoeutheria;Laurasiatheria;Carnivora;Feliformia;Felidae;Felinae;Felis;Felis catus
UniRef100_UPI000DF386E0	1	UPI000DF386E0	zinc finger CCCH domain-containing protein 6	1138	18-1070	6.6e-165	551.9	Puma concolor (Mountain lion)	9696	cellular organisms;Eukaryota;Opisthokonta;Metazoa;Eumetazoa;Bilateria;Deuterostomia;Chordata;Craniata;Vertebrata;Gnathostomata;Teleostomi;Euteleostomi;Sarcopterygii;Dipnotetrapodomorpha;Tetrapoda;Amniota;Mammalia;Theria;Eutheria;Boreoeutheria;Laurasiatheria;Carnivora;Feliformia;Felidae;Felinae;Puma;Puma concolor
UniRef100_UPI000F42BEAE	1	UPI000F42BEAE	zinc finger CCCH domain-containing protein 6 isoform X1	1172	5-1104	4.5e-200	668.3	Acinonyx jubatus (Cheetah)	32536	cellular organisms;Eukaryota;Opisthokonta;Metazoa;Eumetazoa;Bilateria;Deuterostomia;Chordata;Craniata;Vertebrata;Gnathostomata;Teleostomi;Euteleostomi;Sarcopterygii;Dipnotetrapodomorpha;Tetrapoda;Amniota;Mammalia;Theria;Eutheria;Boreoeutheria;Laurasiatheria;Carnivora;Feliformia;Felidae;Acinonychinae;Acinonyx;Acinonyx jubatus
UniRef100_UPI000F428D8E	1	UPI000F428D8E	zinc finger CCCH domain-containing protein 6 isoform X2	1169	5-1101	5.7e-200	667.9	Acinonyx jubatus (Cheetah)	32536	cellular organisms;Eukaryota;Opisthokonta;Metazoa;Eumetazoa;Bilateria;Deuterostomia;Chordata;Craniata;Vertebrata;Gnathostomata;Teleostomi;Euteleostomi;Sarcopterygii;Dipnotetrapodomorpha;Tetrapoda;Amniota;Mammalia;Theria;Eutheria;Boreoeutheria;Laurasiatheria;Carnivora;Feliformia;Felidae;Acinonychinae;Acinonyx;Acinonyx jubatus
UniRef100_UPI0011B0AC34	1	UPI0011B0AC34	LOW QUALITY PROTEIN: zinc finger CCCH domain-containing protein 6	1171	5-1103	1.6e-190	636.7	Lynx canadensis (Canada lynx)	61383	cellular organisms;Eukaryota;Opisthokonta;Metazoa;Eumetazoa;Bilateria;Deuterostomia;Chordata;Craniata;Vertebrata;Gnathostomata;Teleostomi;Euteleostomi;Sarcopterygii;Dipnotetrapodomorpha;Tetrapoda;Amniota;Mammalia;Theria;Eutheria;Boreoeutheria;Laurasiatheria;Carnivora;Feliformia;Felidae;Felinae;Lynx;Lynx canadensis
UniRef100_A0A485MP28	1	A0A485MP28	Zinc finger ccch domain-containing	1049	1-981	2.3e-169	566.7	Lynx pardinus (Iberian lynx) (Felis pardina)	191816	cellular organisms;Eukaryota;Opisthokonta;Metazoa;Eumetazoa;Bilateria;Deuterostomia;Chordata;Craniata;Vertebrata;Gnathostomata;Teleostomi;Euteleostomi;Sarcopterygii;Dipnotetrapodomorpha;Tetrapoda;Amniota;Mammalia;Theria;Eutheria;Boreoeutheria;Laurasiatheria;Carnivora;Feliformia;Felidae;Felinae;Lynx;Lynx pardinus
UniRef100_UPI0011557084	1	UPI0011557084	zinc finger CCCH domain-containing protein 6	1169	5-1101	2.3e-198	662.6	Suricata suricatta (Meerkat)	37032	cellular organisms;Eukaryota;Opisthokonta;Metazoa;Eumetazoa;Bilateria;Deuterostomia;Chordata;Craniata;Vertebrata;Gnathostomata;Teleostomi;Euteleostomi;Sarcopterygii;Dipnotetrapodomorpha;Tetrapoda;Amniota;Mammalia;Theria;Eutheria;Boreoeutheria;Laurasiatheria;Carnivora;Feliformia;Herpestidae;Suricata;Suricata suricatta
UniRef100_A0A2Y9HMP7	1	A0A2Y9HMP7	LOW QUALITY PROTEIN: zinc finger CCCH domain-containing protein 6	1167	5-1101	1.2e-200	670.2	Neomonachus schauinslandi (Hawaiian monk seal) (Monachus schauinslandi)	29088	cellular organisms;Eukaryota;Opisthokonta;Metazoa;Eumetazoa;Bilateria;Deuterostomia;Chordata;Craniata;Vertebrata;Gnathostomata;Teleostomi;Euteleostomi;Sarcopterygii;Dipnotetrapodomorpha;Tetrapoda;Amniota;Mammalia;Theria;Eutheria;Boreoeutheria;Laurasiatheria;Carnivora;Caniformia;Phocidae;Neomonachus;Neomonachus schauinslandi
UniRef100_UPI00123E9CF6	2	UPI00123E9CF6	zinc finger CCCH domain-containing protein 6 isoform X1	1049	1-983	3.1e-171	572.9	Leptonychotes weddellii (Weddell seal) (Otaria weddellii)	9713	cellular organisms;Eukaryota;Opisthokonta;Metazoa;Eumetazoa;Bilateria;Deuterostomia;Chordata;Craniata;Vertebrata;Gnathostomata;Teleostomi;Euteleostomi;Sarcopterygii;Dipnotetrapodomorpha;Tetrapoda;Amniota;Mammalia;Theria;Eutheria;Boreoeutheria;Laurasiatheria;Carnivora;Caniformia;Phocidae;Leptonychotes;Leptonychotes weddellii
UniRef100_A0A2U3VWQ1	1	A0A2U3VWQ1	zinc finger CCCH domain-containing protein 6	1170	5-1107	1.5e-197	659.9	Odobenus rosmarus divergens (Pacific walrus)	9708	cellular organisms;Eukaryota;Opisthokonta;Metazoa;Eumetazoa;Bilateria;Deuterostomia;Chordata;Craniata;Vertebrata;Gnathostomata;Teleostomi;Euteleostomi;Sarcopterygii;Dipnotetrapodomorpha;Tetrapoda;Amniota;Mammalia;Theria;Eutheria;Boreoeutheria;Laurasiatheria;Carnivora;Caniformia;Odobenidae;Odobenus;Odobenus rosmarus;Odobenus rosmarus divergens
UniRef100_UPI000F8052A7	1	UPI000F8052A7	zinc finger CCCH domain-containing protein 6 isoform X1	1169	5-1103	1e-195	653.8	Zalophus californianus (California sealion)	9704	cellular organisms;Eukaryota;Opisthokonta;Metazoa;Eumetazoa;Bilateria;Deuterostomia;Chordata;Craniata;Vertebrata;Gnathostomata;Teleostomi;Euteleostomi;Sarcopterygii;Dipnotetrapodomorpha;Tetrapoda;Amniota;Mammalia;Theria;Eutheria;Boreoeutheria;Laurasiatheria;Carnivora;Caniformia;Otariidae;Zalophus;Zalophus californianus
UniRef100_UPI001016BDBF	1	UPI001016BDBF	zinc finger CCCH domain-containing protein 6	1169	5-1103	1.1e-195	653.7	Eumetopias jubatus (Steller sea lion) (Phoca jubata)	34886	cellular organisms;Eukaryota;Opisthokonta;Metazoa;Eumetazoa;Bilateria;Deuterostomia;Chordata;Craniata;Vertebrata;Gnathostomata;Teleostomi;Euteleostomi;Sarcopterygii;Dipnotetrapodomorpha;Tetrapoda;Amniota;Mammalia;Theria;Eutheria;Boreoeutheria;Laurasiatheria;Carnivora;Caniformia;Otariidae;Eumetopias;Eumetopias jubatus
UniRef100_A0A3Q7NRN1	1	A0A3Q7NRN1	zinc finger CCCH domain-containing protein 6	1169	5-1103	2.6e-195	652.5	Callorhinus ursinus (Northern fur seal)	34884	cellular organisms;Eukaryota;Opisthokonta;Metazoa;Eumetazoa;Bilateria;Deuterostomia;Chordata;Craniata;Vertebrata;Gnathostomata;Teleostomi;Euteleostomi;Sarcopterygii;Dipnotetrapodomorpha;Tetrapoda;Amniota;Mammalia;Theria;Eutheria;Boreoeutheria;Laurasiatheria;Carnivora;Caniformia;Otariidae;Callorhinus;Callorhinus ursinus
UniRef100_A0A2Y9KQH8	1	A0A2Y9KQH8	zinc finger CCCH domain-containing protein 6 isoform X1	1170	5-1107	8.8e-200	667.3	Enhydra lutris kenyoni	391180	cellular organisms;Eukaryota;Opisthokonta;Metazoa;Eumetazoa;Bilateria;Deuterostomia;Chordata;Craniata;Vertebrata;Gnathostomata;Teleostomi;Euteleostomi;Sarcopterygii;Dipnotetrapodomorpha;Tetrapoda;Amniota;Mammalia;Theria;Eutheria;Boreoeutheria;Laurasiatheria;Carnivora;Caniformia;Mustelidae;Lutrinae;Enhydra;Enhydra lutris;Enhydra lutris kenyoni
UniRef100_A0A2Y9KST4	1	A0A2Y9KST4	zinc finger CCCH domain-containing protein 6 isoform X2	1092	5-1029	6.9e-192	641.2	Enhydra lutris kenyoni	391180	cellular organisms;Eukaryota;Opisthokonta;Metazoa;Eumetazoa;Bilateria;Deuterostomia;Chordata;Craniata;Vertebrata;Gnathostomata;Teleostomi;Euteleostomi;Sarcopterygii;Dipnotetrapodomorpha;Tetrapoda;Amniota;Mammalia;Theria;Eutheria;Boreoeutheria;Laurasiatheria;Carnivora;Caniformia;Mustelidae;Lutrinae;Enhydra;Enhydra lutris;Enhydra lutris kenyoni
UniRef100_G9KYN3	1	G9KYN3	Zinc finger CCCH-type containing 6 (Fragment)	1170	5-1100	1.1e-199	667.0	Mustela putorius furo (European domestic ferret) (Mustela furo)	9669	cellular organisms;Eukaryota;Opisthokonta;Metazoa;Eumetazoa;Bilateria;Deuterostomia;Chordata;Craniata;Vertebrata;Gnathostomata;Teleostomi;Euteleostomi;Sarcopterygii;Dipnotetrapodomorpha;Tetrapoda;Amniota;Mammalia;Theria;Eutheria;Boreoeutheria;Laurasiatheria;Carnivora;Caniformia;Mustelidae;Mustelinae;Mustela;Mustela putorius;Mustela putorius furo
UniRef100_M3YDZ1	2	M3YDZ1	Zinc finger CCCH-type containing 6	1050	1-979	4.8e-169	565.6	Mustela putorius furo (European domestic ferret) (Mustela furo)	9669	cellular organisms;Eukaryota;Opisthokonta;Metazoa;Eumetazoa;Bilateria;Deuterostomia;Chordata;Craniata;Vertebrata;Gnathostomata;Teleostomi;Euteleostomi;Sarcopterygii;Dipnotetrapodomorpha;Tetrapoda;Amniota;Mammalia;Theria;Eutheria;Boreoeutheria;Laurasiatheria;Carnivora;Caniformia;Mustelidae;Mustelinae;Mustela;Mustela putorius;Mustela putorius furo
UniRef100_G1MCM6	2	G1MCM6	Zinc finger CCCH-type containing 6	1170	5-1101	1.4e-200	669.9	Ailuropoda melanoleuca (Giant panda)	9646	cellular organisms;Eukaryota;Opisthokonta;Metazoa;Eumetazoa;Bilateria;Deuterostomia;Chordata;Craniata;Vertebrata;Gnathostomata;Teleostomi;Euteleostomi;Sarcopterygii;Dipnotetrapodomorpha;Tetrapoda;Amniota;Mammalia;Theria;Eutheria;Boreoeutheria;Laurasiatheria;Carnivora;Caniformia;Ursidae;Ailuropoda;Ailuropoda melanoleuca
UniRef100_D2HPG8	1	D2HPG8	Uncharacterized protein (Fragment)	1161	2-1092	4.7e-199	664.9	Ailuropoda melanoleuca (Giant panda)	9646	cellular organisms;Eukaryota;Opisthokonta;Metazoa;Eumetazoa;Bilateria;Deuterostomia;Chordata;Craniata;Vertebrata;Gnathostomata;Teleostomi;Euteleostomi;Sarcopterygii;Dipnotetrapodomorpha;Tetrapoda;Amniota;Mammalia;Theria;Eutheria;Boreoeutheria;Laurasiatheria;Carnivora;Caniformia;Ursidae;Ailuropoda;Ailuropoda melanoleuca
UniRef100_A0A3Q7TJI2	1	A0A3Q7TJI2	zinc finger CCCH domain-containing protein 6 isoform X1	1169	5-1100	7e-200	667.6	Ursus arctos horribilis	116960	cellular organisms;Eukaryota;Opisthokonta;Metazoa;Eumetazoa;Bilateria;Deuterostomia;Chordata;Craniata;Vertebrata;Gnathostomata;Teleostomi;Euteleostomi;Sarcopterygii;Dipnotetrapodomorpha;Tetrapoda;Amniota;Mammalia;Theria;Eutheria;Boreoeutheria;Laurasiatheria;Carnivora;Caniformia;Ursidae;Ursus;Ursus arctos;Ursus arctos horribilis
UniRef100_A0A452QDF7	1	A0A452QDF7	Zinc finger CCCH-type containing 6	1049	1-980	3.4e-169	566.1	Ursus americanus (American black bear) (Euarctos americanus)	9643	cellular organisms;Eukaryota;Opisthokonta;Metazoa;Eumetazoa;Bilateria;Deuterostomia;Chordata;Craniata;Vertebrata;Gnathostomata;Teleostomi;Euteleostomi;Sarcopterygii;Dipnotetrapodomorpha;Tetrapoda;Amniota;Mammalia;Theria;Eutheria;Boreoeutheria;Laurasiatheria;Carnivora;Caniformia;Ursidae;Ursus;Ursus americanus
UniRef100_A0A384CV65	2	A0A384CV65	zinc finger CCCH domain-containing protein 6	1165	8-1095	4.6e-199	664.9	Ursus maritimus (Polar bear) (Thalarctos maritimus)	29073	cellular organisms;Eukaryota;Opisthokonta;Metazoa;Eumetazoa;Bilateria;Deuterostomia;Chordata;Craniata;Vertebrata;Gnathostomata;Teleostomi;Euteleostomi;Sarcopterygii;Dipnotetrapodomorpha;Tetrapoda;Amniota;Mammalia;Theria;Eutheria;Boreoeutheria;Laurasiatheria;Carnivora;Caniformia;Ursidae;Ursus;Ursus maritimus
UniRef100_A0A452TTI4	1	A0A452TTI4	Zinc finger CCCH-type containing 6	971	1-901	1.9e-160	537.1	Ursus maritimus (Polar bear) (Thalarctos maritimus)	29073	cellular organisms;Eukaryota;Opisthokonta;Metazoa;Eumetazoa;Bilateria;Deuterostomia;Chordata;Craniata;Vertebrata;Gnathostomata;Teleostomi;Euteleostomi;Sarcopterygii;Dipnotetrapodomorpha;Tetrapoda;Amniota;Mammalia;Theria;Eutheria;Boreoeutheria;Laurasiatheria;Carnivora;Caniformia;Ursidae;Ursus;Ursus maritimus
UniRef100_A0A3Q7V025	1	A0A3Q7V025	zinc finger CCCH domain-containing protein 6 isoform X2	1091	5-1022	1.5e-191	640.1	Ursus arctos horribilis	116960	cellular organisms;Eukaryota;Opisthokonta;Metazoa;Eumetazoa;Bilateria;Deuterostomia;Chordata;Craniata;Vertebrata;Gnathostomata;Teleostomi;Euteleostomi;Sarcopterygii;Dipnotetrapodomorpha;Tetrapoda;Amniota;Mammalia;Theria;Eutheria;Boreoeutheria;Laurasiatheria;Carnivora;Caniformia;Ursidae;Ursus;Ursus arctos;Ursus arctos horribilis
UniRef100_A0A3Q7S307	2	A0A3Q7S307	zinc finger CCCH domain-containing protein 6 isoform X1	1166	5-1092	4.2e-198	661.7	Vulpes vulpes (Red fox)	9627	cellular organisms;Eukaryota;Opisthokonta;Metazoa;Eumetazoa;Bilateria;Deuterostomia;Chordata;Craniata;Vertebrata;Gnathostomata;Teleostomi;Euteleostomi;Sarcopterygii;Dipnotetrapodomorpha;Tetrapoda;Amniota;Mammalia;Theria;Eutheria;Boreoeutheria;Laurasiatheria;Carnivora;Caniformia;Canidae;Vulpes;Vulpes vulpes
UniRef100_A0A3Q7RXC3	1	A0A3Q7RXC3	zinc finger CCCH domain-containing protein 6 isoform X2	1158	4-1084	6.2e-198	661.2	Vulpes vulpes (Red fox)	9627	cellular organisms;Eukaryota;Opisthokonta;Metazoa;Eumetazoa;Bilateria;Deuterostomia;Chordata;Craniata;Vertebrata;Gnathostomata;Teleostomi;Euteleostomi;Sarcopterygii;Dipnotetrapodomorpha;Tetrapoda;Amniota;Mammalia;Theria;Eutheria;Boreoeutheria;Laurasiatheria;Carnivora;Caniformia;Canidae;Vulpes;Vulpes vulpes
UniRef100_F1PWF3	2	F1PWF3	Zinc finger CCCH-type containing 6	1166	5-1089	5e-198	661.5	Canis lupus familiaris (Dog) (Canis familiaris)	9615	cellular organisms;Eukaryota;Opisthokonta;Metazoa;Eumetazoa;Bilateria;Deuterostomia;Chordata;Craniata;Vertebrata;Gnathostomata;Teleostomi;Euteleostomi;Sarcopterygii;Dipnotetrapodomorpha;Tetrapoda;Amniota;Mammalia;Theria;Eutheria;Boreoeutheria;Laurasiatheria;Carnivora;Caniformia;Canidae;Canis;Canis lupus;Canis lupus familiaris
UniRef100_UPI00071966DC	2	UPI00071966DC	zinc finger CCCH domain-containing protein 6 isoform X1	1183	13-1121	9.5e-202	673.8	Ceratotherium simum simum (southern white rhinoceros)	73337	cellular organisms;Eukaryota;Opisthokonta;Metazoa;Eumetazoa;Bilateria;Deuterostomia;Chordata;Craniata;Vertebrata;Gnathostomata;Teleostomi;Euteleostomi;Sarcopterygii;Dipnotetrapodomorpha;Tetrapoda;Amniota;Mammalia;Theria;Eutheria;Boreoeutheria;Laurasiatheria;Perissodactyla;Rhinocerotidae;Ceratotherium;Ceratotherium simum;Ceratotherium simum simum
UniRef100_UPI000C9E629A	2	UPI000C9E629A	zinc finger CCCH domain-containing protein 6 isoform X1	1184	13-1122	1.4e-201	673.3	Equus caballus (Horse)	35510	cellular organisms;Eukaryota;Opisthokonta;Metazoa;Eumetazoa;Bilateria;Deuterostomia;Chordata;Craniata;Vertebrata;Gnathostomata;Teleostomi;Euteleostomi;Sarcopterygii;Dipnotetrapodomorpha;Tetrapoda;Amniota;Mammalia;Theria;Eutheria;Boreoeutheria;Laurasiatheria;Perissodactyla;Equidae;Equus;Equus
UniRef100_F7CPY0	1	F7CPY0	Zinc finger CCCH-type containing 6	1183	12-1121	1.7e-201	673.0	Equus caballus (Horse)	9796	cellular organisms;Eukaryota;Opisthokonta;Metazoa;Eumetazoa;Bilateria;Deuterostomia;Chordata;Craniata;Vertebrata;Gnathostomata;Teleostomi;Euteleostomi;Sarcopterygii;Dipnotetrapodomorpha;Tetrapoda;Amniota;Mammalia;Theria;Eutheria;Boreoeutheria;Laurasiatheria;Perissodactyla;Equidae;Equus;Equus;Equus caballus
UniRef100_UPI000719FD5A	2	UPI000719FD5A	zinc finger CCCH domain-containing protein 6 isoform X1	1184	13-1122	1.9e-200	669.5	Equus asinus (Donkey) (Equus africanus asinus)	9793	cellular organisms;Eukaryota;Opisthokonta;Metazoa;Eumetazoa;Bilateria;Deuterostomia;Chordata;Craniata;Vertebrata;Gnathostomata;Teleostomi;Euteleostomi;Sarcopterygii;Dipnotetrapodomorpha;Tetrapoda;Amniota;Mammalia;Theria;Eutheria;Boreoeutheria;Laurasiatheria;Perissodactyla;Equidae;Equus;Asinus;Equus asinus
UniRef100_UPI00071A050C	1	UPI00071A050C	zinc finger CCCH domain-containing protein 6 isoform X2	1183	12-1121	2.4e-200	669.2	Equus asinus (Donkey) (Equus africanus asinus)	9793	cellular organisms;Eukaryota;Opisthokonta;Metazoa;Eumetazoa;Bilateria;Deuterostomia;Chordata;Craniata;Vertebrata;Gnathostomata;Teleostomi;Euteleostomi;Sarcopterygii;Dipnotetrapodomorpha;Tetrapoda;Amniota;Mammalia;Theria;Eutheria;Boreoeutheria;Laurasiatheria;Perissodactyla;Equidae;Equus;Asinus;Equus asinus
UniRef100_UPI000812FA1C	2	UPI000812FA1C	zinc finger CCCH domain-containing protein 6 isoform X1	1197	5-1129	2.6e-196	655.8	Manis javanica (Malayan pangolin) (Sunda pangolin)	9974	cellular organisms;Eukaryota;Opisthokonta;Metazoa;Eumetazoa;Bilateria;Deuterostomia;Chordata;Craniata;Vertebrata;Gnathostomata;Teleostomi;Euteleostomi;Sarcopterygii;Dipnotetrapodomorpha;Tetrapoda;Amniota;Mammalia;Theria;Eutheria;Boreoeutheria;Laurasiatheria;Pholidota;Manidae;Manis;Manis javanica
UniRef100_UPI0003F178CE	1	UPI0003F178CE	zinc finger CCCH domain-containing protein 6	1184	5-1114	1.9e-199	666.2	Chrysochloris asiatica (Cape golden mole)	185453	cellular organisms;Eukaryota;Opisthokonta;Metazoa;Eumetazoa;Bilateria;Deuterostomia;Chordata;Craniata;Vertebrata;Gnathostomata;Teleostomi;Euteleostomi;Sarcopterygii;Dipnotetrapodomorpha;Tetrapoda;Amniota;Mammalia;Theria;Eutheria;Afrotheria;Chrysochloridae;Chrysochlorinae;Chrysochloris;Chrysochloris asiatica
UniRef100_UPI0003341359	1	UPI0003341359	zinc finger CCCH domain-containing protein 6	1123	9-1038	2.8e-168	563.1	Echinops telfairi (Lesser hedgehog tenrec)	9371	cellular organisms;Eukaryota;Opisthokonta;Metazoa;Eumetazoa;Bilateria;Deuterostomia;Chordata;Craniata;Vertebrata;Gnathostomata;Teleostomi;Euteleostomi;Sarcopterygii;Dipnotetrapodomorpha;Tetrapoda;Amniota;Mammalia;Theria;Eutheria;Afrotheria;Tenrecidae;Tenrecinae;Echinops;Echinops telfairi
UniRef100_UPI000C810F16	1	UPI000C810F16	LOW QUALITY PROTEIN: zinc finger CCCH domain-containing protein 6	1177	5-1097	9.1e-194	647.4	Loxodonta africana (African elephant)	9785	cellular organisms;Eukaryota;Opisthokonta;Metazoa;Eumetazoa;Bilateria;Deuterostomia;Chordata;Craniata;Vertebrata;Gnathostomata;Teleostomi;Euteleostomi;Sarcopterygii;Dipnotetrapodomorpha;Tetrapoda;Amniota;Mammalia;Theria;Eutheria;Afrotheria;Proboscidea;Elephantidae;Loxodonta;Loxodonta africana
UniRef100_G3SN24	1	G3SN24	Zinc finger CCCH-type containing 6	1094	1-1014	1.2e-169	567.6	Loxodonta africana (African elephant)	9785	cellular organisms;Eukaryota;Opisthokonta;Metazoa;Eumetazoa;Bilateria;Deuterostomia;Chordata;Craniata;Vertebrata;Gnathostomata;Teleostomi;Euteleostomi;Sarcopterygii;Dipnotetrapodomorpha;Tetrapoda;Amniota;Mammalia;Theria;Eutheria;Afrotheria;Proboscidea;Elephantidae;Loxodonta;Loxodonta africana
UniRef100_A0A2Y9RVE1	1	A0A2Y9RVE1	zinc finger CCCH domain-containing protein 6 isoform X1	1201	33-1138	4.7e-190	635.1	Trichechus manatus latirostris (Florida manatee)	127582	cellular organisms;Eukaryota;Opisthokonta;Metazoa;Eumetazoa;Bilateria;Deuterostomia;Chordata;Craniata;Vertebrata;Gnathostomata;Teleostomi;Euteleostomi;Sarcopterygii;Dipnotetrapodomorpha;Tetrapoda;Amniota;Mammalia;Theria;Eutheria;Afrotheria;Sirenia;Trichechidae;Trichechus;Trichechus manatus;Trichechus manatus latirostris
UniRef100_A0A2Y9S393	1	A0A2Y9S393	zinc finger CCCH domain-containing protein 6 isoform X2	1176	5-1113	9.7e-190	634.1	Trichechus manatus latirostris (Florida manatee)	127582	cellular organisms;Eukaryota;Opisthokonta;Metazoa;Eumetazoa;Bilateria;Deuterostomia;Chordata;Craniata;Vertebrata;Gnathostomata;Teleostomi;Euteleostomi;Sarcopterygii;Dipnotetrapodomorpha;Tetrapoda;Amniota;Mammalia;Theria;Eutheria;Afrotheria;Sirenia;Trichechidae;Trichechus;Trichechus manatus;Trichechus manatus latirostris
UniRef100_A0A2Y9S2F7	1	A0A2Y9S2F7	zinc finger CCCH domain-containing protein 6 isoform X3	1124	33-1061	4e-182	608.9	Trichechus manatus latirostris (Florida manatee)	127582	cellular organisms;Eukaryota;Opisthokonta;Metazoa;Eumetazoa;Bilateria;Deuterostomia;Chordata;Craniata;Vertebrata;Gnathostomata;Teleostomi;Euteleostomi;Sarcopterygii;Dipnotetrapodomorpha;Tetrapoda;Amniota;Mammalia;Theria;Eutheria;Afrotheria;Sirenia;Trichechidae;Trichechus;Trichechus manatus;Trichechus manatus latirostris
UniRef100_UPI00045E0204	1	UPI00045E0204	zinc finger CCCH domain-containing protein 6	1104	4-1031	1.5e-173	580.5	Orycteropus afer afer	1230840	cellular organisms;Eukaryota;Opisthokonta;Metazoa;Eumetazoa;Bilateria;Deuterostomia;Chordata;Craniata;Vertebrata;Gnathostomata;Teleostomi;Euteleostomi;Sarcopterygii;Dipnotetrapodomorpha;Tetrapoda;Amniota;Mammalia;Theria;Eutheria;Afrotheria;Tubulidentata;Orycteropodidae;Orycteropus;Orycteropus afer;Orycteropus afer afer
UniRef100_UPI0003F086DD	1	UPI0003F086DD	zinc finger CCCH domain-containing protein 6-like	1172	10-1096	5.8e-190	634.8	Elephantulus edwardii (Cape long-eared elephant shrew)	28737	cellular organisms;Eukaryota;Opisthokonta;Metazoa;Eumetazoa;Bilateria;Deuterostomia;Chordata;Craniata;Vertebrata;Gnathostomata;Teleostomi;Euteleostomi;Sarcopterygii;Dipnotetrapodomorpha;Tetrapoda;Amniota;Mammalia;Theria;Eutheria;Afrotheria;Macroscelidea;Macroscelididae;Elephantulus;Elephantulus edwardii
UniRef100_UPI00062A6C88	1	UPI00062A6C88	LOW QUALITY PROTEIN: zinc finger CCCH domain-containing protein 6	1038	2-964	3.3e-158	529.8	Dasypus novemcinctus (Nine-banded armadillo)	9361	cellular organisms;Eukaryota;Opisthokonta;Metazoa;Eumetazoa;Bilateria;Deuterostomia;Chordata;Craniata;Vertebrata;Gnathostomata;Teleostomi;Euteleostomi;Sarcopterygii;Dipnotetrapodomorpha;Tetrapoda;Amniota;Mammalia;Theria;Eutheria;Xenarthra;Cingulata;Dasypodidae;Dasypus;Dasypus novemcinctus
UniRef100_UPI000A28A8B2	1	UPI000A28A8B2	zinc finger CCCH domain-containing protein 6 isoform X1	1207	1-1137	3.7e-200	668.5	Phascolarctos cinereus (Koala)	38626	cellular organisms;Eukaryota;Opisthokonta;Metazoa;Eumetazoa;Bilateria;Deuterostomia;Chordata;Craniata;Vertebrata;Gnathostomata;Teleostomi;Euteleostomi;Sarcopterygii;Dipnotetrapodomorpha;Tetrapoda;Amniota;Mammalia;Theria;Metatheria;Diprotodontia;Phascolarctidae;Phascolarctos;Phascolarctos cinereus
UniRef100_UPI000A283EC4	1	UPI000A283EC4	zinc finger CCCH domain-containing protein 6 isoform X3	1189	10-1119	5.7e-197	658.0	Phascolarctos cinereus (Koala)	38626	cellular organisms;Eukaryota;Opisthokonta;Metazoa;Eumetazoa;Bilateria;Deuterostomia;Chordata;Craniata;Vertebrata;Gnathostomata;Teleostomi;Euteleostomi;Sarcopterygii;Dipnotetrapodomorpha;Tetrapoda;Amniota;Mammalia;Theria;Metatheria;Diprotodontia;Phascolarctidae;Phascolarctos;Phascolarctos cinereus
UniRef100_UPI000A281E15	1	UPI000A281E15	zinc finger CCCH domain-containing protein 6 isoform X2	1202	25-1132	2.4e-197	659.3	Phascolarctos cinereus (Koala)	38626	cellular organisms;Eukaryota;Opisthokonta;Metazoa;Eumetazoa;Bilateria;Deuterostomia;Chordata;Craniata;Vertebrata;Gnathostomata;Teleostomi;Euteleostomi;Sarcopterygii;Dipnotetrapodomorpha;Tetrapoda;Amniota;Mammalia;Theria;Metatheria;Diprotodontia;Phascolarctidae;Phascolarctos;Phascolarctos cinereus
UniRef100_UPI000FFD9434	1	UPI000FFD9434	zinc finger CCCH domain-containing protein 6 isoform X2	1182	5-1103	1.4e-195	653.4	Vombatus ursinus (Common wombat)	29139	cellular organisms;Eukaryota;Opisthokonta;Metazoa;Eumetazoa;Bilateria;Deuterostomia;Chordata;Craniata;Vertebrata;Gnathostomata;Teleostomi;Euteleostomi;Sarcopterygii;Dipnotetrapodomorpha;Tetrapoda;Amniota;Mammalia;Theria;Metatheria;Diprotodontia;Vombatidae;Vombatus;Vombatus ursinus
UniRef100_A0A4X2L7P2	2	A0A4X2L7P2	Zinc finger CCCH-type containing 6	1068	3-989	6.8e-166	555.2	Vombatus ursinus (Common wombat)	29139	cellular organisms;Eukaryota;Opisthokonta;Metazoa;Eumetazoa;Bilateria;Deuterostomia;Chordata;Craniata;Vertebrata;Gnathostomata;Teleostomi;Euteleostomi;Sarcopterygii;Dipnotetrapodomorpha;Tetrapoda;Amniota;Mammalia;Theria;Metatheria;Diprotodontia;Vombatidae;Vombatus;Vombatus ursinus
UniRef100_F7GEW5	1	F7GEW5	Zinc finger CCCH-type containing 6	1189	4-1114	1.5e-195	653.3	Monodelphis domestica (Gray short-tailed opossum)	13616	cellular organisms;Eukaryota;Opisthokonta;Metazoa;Eumetazoa;Bilateria;Deuterostomia;Chordata;Craniata;Vertebrata;Gnathostomata;Teleostomi;Euteleostomi;Sarcopterygii;Dipnotetrapodomorpha;Tetrapoda;Amniota;Mammalia;Theria;Metatheria;Didelphimorphia;Didelphidae;Didelphinae;Monodelphis;Monodelphis domestica
UniRef100_G3WVY8	2	G3WVY8	Zinc finger CCCH-type containing 6	990	5-926	5e-148	496.1	Sarcophilus harrisii (Tasmanian devil) (Sarcophilus laniarius)	9305	cellular organisms;Eukaryota;Opisthokonta;Metazoa;Eumetazoa;Bilateria;Deuterostomia;Chordata;Craniata;Vertebrata;Gnathostomata;Teleostomi;Euteleostomi;Sarcopterygii;Dipnotetrapodomorpha;Tetrapoda;Amniota;Mammalia;Theria;Metatheria;Dasyuromorphia;Dasyuridae;Sarcophilus;Sarcophilus harrisii
UniRef100_UPI0010A8DD64	1	UPI0010A8DD64	zinc finger CCCH domain-containing protein 6 isoform X2	1209	1-1135	1.6e-200	669.8	Ornithorhynchus anatinus (Duckbill platypus)	9258	cellular organisms;Eukaryota;Opisthokonta;Metazoa;Eumetazoa;Bilateria;Deuterostomia;Chordata;Craniata;Vertebrata;Gnathostomata;Teleostomi;Euteleostomi;Sarcopterygii;Dipnotetrapodomorpha;Tetrapoda;Amniota;Mammalia;Prototheria;Monotremata;Ornithorhynchidae;Ornithorhynchus;Ornithorhynchus anatinus
UniRef100_UPI0010A7654F	2	UPI0010A7654F	zinc finger CCCH domain-containing protein 6 isoform X1	1233	50-1159	7.7e-197	657.6	Ornithorhynchus anatinus (Duckbill platypus)	9258	cellular organisms;Eukaryota;Opisthokonta;Metazoa;Eumetazoa;Bilateria;Deuterostomia;Chordata;Craniata;Vertebrata;Gnathostomata;Teleostomi;Euteleostomi;Sarcopterygii;Dipnotetrapodomorpha;Tetrapoda;Amniota;Mammalia;Prototheria;Monotremata;Ornithorhynchidae;Ornithorhynchus;Ornithorhynchus anatinus
UniRef100_F7DDS5	1	F7DDS5	Zinc finger CCCH-type containing 6	1223	50-1161	9.5e-197	657.3	Ornithorhynchus anatinus (Duckbill platypus)	9258	cellular organisms;Eukaryota;Opisthokonta;Metazoa;Eumetazoa;Bilateria;Deuterostomia;Chordata;Craniata;Vertebrata;Gnathostomata;Teleostomi;Euteleostomi;Sarcopterygii;Dipnotetrapodomorpha;Tetrapoda;Amniota;Mammalia;Prototheria;Monotremata;Ornithorhynchidae;Ornithorhynchus;Ornithorhynchus anatinus
UniRef100_F7DDT2	1	F7DDT2	Zinc finger CCCH-type containing 6	1167	30-1093	1.3e-182	610.6	Ornithorhynchus anatinus (Duckbill platypus)	9258	cellular organisms;Eukaryota;Opisthokonta;Metazoa;Eumetazoa;Bilateria;Deuterostomia;Chordata;Craniata;Vertebrata;Gnathostomata;Teleostomi;Euteleostomi;Sarcopterygii;Dipnotetrapodomorpha;Tetrapoda;Amniota;Mammalia;Prototheria;Monotremata;Ornithorhynchidae;Ornithorhynchus;Ornithorhynchus anatinus
UniRef100_UPI00042C09F8	1	UPI00042C09F8	zinc finger CCCH domain-containing protein 6	1207	1-1138	3.4e-206	688.5	Chelonia mydas (Green sea-turtle) (Chelonia agassizi)	8469	cellular organisms;Eukaryota;Opisthokonta;Metazoa;Eumetazoa;Bilateria;Deuterostomia;Chordata;Craniata;Vertebrata;Gnathostomata;Teleostomi;Euteleostomi;Sarcopterygii;Dipnotetrapodomorpha;Tetrapoda;Amniota;Sauropsida;Sauria;Archelosauria;Testudines;Cryptodira;Durocryptodira;Americhelydia;Chelonioidea;Cheloniidae;Chelonia;Chelonia mydas
UniRef100_M7BH78	1	M7BH78	Zinc finger CCCH domain-containing protein 6	1104	3-1035	9.9e-122	409.1	Chelonia mydas (Green sea-turtle) (Chelonia agassizi)	8469	cellular organisms;Eukaryota;Opisthokonta;Metazoa;Eumetazoa;Bilateria;Deuterostomia;Chordata;Craniata;Vertebrata;Gnathostomata;Teleostomi;Euteleostomi;Sarcopterygii;Dipnotetrapodomorpha;Tetrapoda;Amniota;Sauropsida;Sauria;Archelosauria;Testudines;Cryptodira;Durocryptodira;Americhelydia;Chelonioidea;Cheloniidae;Chelonia;Chelonia mydas
UniRef100_K7F3G3	1	K7F3G3	Zinc finger CCCH-type containing 6	1166	2-1104	1.6e-205	686.3	Pelodiscus sinensis (Chinese softshell turtle) (Trionyx sinensis)	13735	cellular organisms;Eukaryota;Opisthokonta;Metazoa;Eumetazoa;Bilateria;Deuterostomia;Chordata;Craniata;Vertebrata;Gnathostomata;Teleostomi;Euteleostomi;Sarcopterygii;Dipnotetrapodomorpha;Tetrapoda;Amniota;Sauropsida;Sauria;Archelosauria;Testudines;Cryptodira;Trionychia;Trionychidae;Pelodiscus;Pelodiscus sinensis
UniRef100_UPI0003C43DCF	1	UPI0003C43DCF	zinc finger CCCH domain-containing protein 6	1195	20-1133	6.9e-204	680.9	Pelodiscus sinensis (Chinese softshell turtle) (Trionyx sinensis)	13735	cellular organisms;Eukaryota;Opisthokonta;Metazoa;Eumetazoa;Bilateria;Deuterostomia;Chordata;Craniata;Vertebrata;Gnathostomata;Teleostomi;Euteleostomi;Sarcopterygii;Dipnotetrapodomorpha;Tetrapoda;Amniota;Sauropsida;Sauria;Archelosauria;Testudines;Cryptodira;Trionychia;Trionychidae;Pelodiscus;Pelodiscus sinensis
UniRef100_K7F3G2	1	K7F3G2	Zinc finger CCCH-type containing 6	1169	1-1107	7.1e-198	661.0	Pelodiscus sinensis (Chinese softshell turtle) (Trionyx sinensis)	13735	cellular organisms;Eukaryota;Opisthokonta;Metazoa;Eumetazoa;Bilateria;Deuterostomia;Chordata;Craniata;Vertebrata;Gnathostomata;Teleostomi;Euteleostomi;Sarcopterygii;Dipnotetrapodomorpha;Tetrapoda;Amniota;Sauropsida;Sauria;Archelosauria;Testudines;Cryptodira;Trionychia;Trionychidae;Pelodiscus;Pelodiscus sinensis
UniRef100_UPI00046BFF82	1	UPI00046BFF82	zinc finger CCCH domain-containing protein 6	1207	1-1149	9.7e-204	680.4	Chrysemys picta bellii (Western painted turtle) (Emys bellii)	8478	cellular organisms;Eukaryota;Opisthokonta;Metazoa;Eumetazoa;Bilateria;Deuterostomia;Chordata;Craniata;Vertebrata;Gnathostomata;Teleostomi;Euteleostomi;Sarcopterygii;Dipnotetrapodomorpha;Tetrapoda;Amniota;Sauropsida;Sauria;Archelosauria;Testudines;Cryptodira;Durocryptodira;Testudinoidea;Emydidae;Chrysemys;Chrysemys picta;Chrysemys picta bellii
UniRef100_UPI000E778026	1	UPI000E778026	zinc finger CCCH domain-containing protein 6 isoform X1	1076	5-1017	5.6e-174	581.9	Terrapene carolina triunguis (Three-toed box turtle)	2587831	cellular organisms;Eukaryota;Opisthokonta;Metazoa;Eumetazoa;Bilateria;Deuterostomia;Chordata;Craniata;Vertebrata;Gnathostomata;Teleostomi;Euteleostomi;Sarcopterygii;Dipnotetrapodomorpha;Tetrapoda;Amniota;Sauropsida;Sauria;Archelosauria;Testudines;Cryptodira;Durocryptodira;Testudinoidea;Emydidae;Terrapene;Terrapene carolina;Terrapene carolina triunguis
UniRef100_UPI000E776522	1	UPI000E776522	zinc finger CCCH domain-containing protein 6 isoform X2	1030	5-972	8e-172	574.8	Terrapene carolina triunguis (Three-toed box turtle)	2587831	cellular organisms;Eukaryota;Opisthokonta;Metazoa;Eumetazoa;Bilateria;Deuterostomia;Chordata;Craniata;Vertebrata;Gnathostomata;Teleostomi;Euteleostomi;Sarcopterygii;Dipnotetrapodomorpha;Tetrapoda;Amniota;Sauropsida;Sauria;Archelosauria;Testudines;Cryptodira;Durocryptodira;Testudinoidea;Emydidae;Terrapene;Terrapene carolina;Terrapene carolina triunguis
UniRef100_UPI0011CF8C0F	1	UPI0011CF8C0F	LOW QUALITY PROTEIN: zinc finger CCCH domain-containing protein 6	1207	1-1148	1.4e-202	676.5	Gopherus evgoodei (Goodes thornscrub tortoise)	1825980	cellular organisms;Eukaryota;Opisthokonta;Metazoa;Eumetazoa;Bilateria;Deuterostomia;Chordata;Craniata;Vertebrata;Gnathostomata;Teleostomi;Euteleostomi;Sarcopterygii;Dipnotetrapodomorpha;Tetrapoda;Amniota;Sauropsida;Sauria;Archelosauria;Testudines;Cryptodira;Durocryptodira;Testudinoidea;Testudinidae;Gopherus;Gopherus evgoodei
UniRef100_A0A452HHA7	1	A0A452HHA7	Zinc finger CCCH-type containing 6	1207	1-1149	1.1e-198	663.6	Gopherus agassizii (Agassiz's desert tortoise)	38772	cellular organisms;Eukaryota;Opisthokonta;Metazoa;Eumetazoa;Bilateria;Deuterostomia;Chordata;Craniata;Vertebrata;Gnathostomata;Teleostomi;Euteleostomi;Sarcopterygii;Dipnotetrapodomorpha;Tetrapoda;Amniota;Sauropsida;Sauria;Archelosauria;Testudines;Cryptodira;Durocryptodira;Testudinoidea;Testudinidae;Gopherus;Gopherus agassizii
UniRef100_A0A452HHB3	1	A0A452HHB3	Zinc finger CCCH-type containing 6	1177	2-1119	1.4e-196	656.7	Gopherus agassizii (Agassiz's desert tortoise)	38772	cellular organisms;Eukaryota;Opisthokonta;Metazoa;Eumetazoa;Bilateria;Deuterostomia;Chordata;Craniata;Vertebrata;Gnathostomata;Teleostomi;Euteleostomi;Sarcopterygii;Dipnotetrapodomorpha;Tetrapoda;Amniota;Sauropsida;Sauria;Archelosauria;Testudines;Cryptodira;Durocryptodira;Testudinoidea;Testudinidae;Gopherus;Gopherus agassizii
UniRef100_A0A4D9E631	1	A0A4D9E631	Protein NipSnap-like protein 1	1207	1-1149	9.4e-205	683.8	Platysternon megacephalum (big-headed turtle)	55544	cellular organisms;Eukaryota;Opisthokonta;Metazoa;Eumetazoa;Bilateria;Deuterostomia;Chordata;Craniata;Vertebrata;Gnathostomata;Teleostomi;Euteleostomi;Sarcopterygii;Dipnotetrapodomorpha;Tetrapoda;Amniota;Sauropsida;Sauria;Archelosauria;Testudines;Cryptodira;Durocryptodira;Testudinoidea;Platysternidae;Platysternon;Platysternon megacephalum
UniRef100_A0A151M1N7	1	A0A151M1N7	Zinc finger CCCH domain-containing protein 6	1195	1-1140	1.3e-201	673.3	Alligator mississippiensis (American alligator)	8496	cellular organisms;Eukaryota;Opisthokonta;Metazoa;Eumetazoa;Bilateria;Deuterostomia;Chordata;Craniata;Vertebrata;Gnathostomata;Teleostomi;Euteleostomi;Sarcopterygii;Dipnotetrapodomorpha;Tetrapoda;Amniota;Sauropsida;Sauria;Archelosauria;Archosauria;Crocodylia;Alligatoridae;Alligatorinae;Alligator;Alligator mississippiensis
UniRef100_UPI0009072815	1	UPI0009072815	zinc finger CCCH domain-containing protein 6 isoform X2	1195	18-1126	5.1e-198	661.5	Alligator mississippiensis (American alligator)	8496	cellular organisms;Eukaryota;Opisthokonta;Metazoa;Eumetazoa;Bilateria;Deuterostomia;Chordata;Craniata;Vertebrata;Gnathostomata;Teleostomi;Euteleostomi;Sarcopterygii;Dipnotetrapodomorpha;Tetrapoda;Amniota;Sauropsida;Sauria;Archelosauria;Archosauria;Crocodylia;Alligatoridae;Alligatorinae;Alligator;Alligator mississippiensis
UniRef100_UPI000907634D	1	UPI000907634D	zinc finger CCCH domain-containing protein 6 isoform X3	1192	15-1123	1.4e-198	663.3	Alligator mississippiensis (American alligator)	8496	cellular organisms;Eukaryota;Opisthokonta;Metazoa;Eumetazoa;Bilateria;Deuterostomia;Chordata;Craniata;Vertebrata;Gnathostomata;Teleostomi;Euteleostomi;Sarcopterygii;Dipnotetrapodomorpha;Tetrapoda;Amniota;Sauropsida;Sauria;Archelosauria;Archosauria;Crocodylia;Alligatoridae;Alligatorinae;Alligator;Alligator mississippiensis
UniRef100_UPI0009071945	1	UPI0009071945	zinc finger CCCH domain-containing protein 6 isoform X4	1185	8-1116	4.8e-198	661.6	Alligator mississippiensis (American alligator)	8496	cellular organisms;Eukaryota;Opisthokonta;Metazoa;Eumetazoa;Bilateria;Deuterostomia;Chordata;Craniata;Vertebrata;Gnathostomata;Teleostomi;Euteleostomi;Sarcopterygii;Dipnotetrapodomorpha;Tetrapoda;Amniota;Sauropsida;Sauria;Archelosauria;Archosauria;Crocodylia;Alligatoridae;Alligatorinae;Alligator;Alligator mississippiensis
UniRef100_UPI0007113368	1	UPI0007113368	zinc finger CCCH domain-containing protein 6 isoform X1	1209	1-1140	4.2e-201	671.7	Alligator mississippiensis (American alligator)	8496	cellular organisms;Eukaryota;Opisthokonta;Metazoa;Eumetazoa;Bilateria;Deuterostomia;Chordata;Craniata;Vertebrata;Gnathostomata;Teleostomi;Euteleostomi;Sarcopterygii;Dipnotetrapodomorpha;Tetrapoda;Amniota;Sauropsida;Sauria;Archelosauria;Archosauria;Crocodylia;Alligatoridae;Alligatorinae;Alligator;Alligator mississippiensis
UniRef100_A0A3Q0GPZ1	1	A0A3Q0GPZ1	LOW QUALITY PROTEIN: zinc finger CCCH domain-containing protein 6	1185	8-1116	1e-197	660.5	Alligator sinensis (Chinese alligator)	38654	cellular organisms;Eukaryota;Opisthokonta;Metazoa;Eumetazoa;Bilateria;Deuterostomia;Chordata;Craniata;Vertebrata;Gnathostomata;Teleostomi;Euteleostomi;Sarcopterygii;Dipnotetrapodomorpha;Tetrapoda;Amniota;Sauropsida;Sauria;Archelosauria;Archosauria;Crocodylia;Alligatoridae;Alligatorinae;Alligator;Alligator sinensis
UniRef100_UPI00092FB632	1	UPI00092FB632	zinc finger CCCH domain-containing protein 6 isoform X1	1192	15-1123	2.7e-198	662.4	Gavialis gangeticus (Indian gharial)	94835	cellular organisms;Eukaryota;Opisthokonta;Metazoa;Eumetazoa;Bilateria;Deuterostomia;Chordata;Craniata;Vertebrata;Gnathostomata;Teleostomi;Euteleostomi;Sarcopterygii;Dipnotetrapodomorpha;Tetrapoda;Amniota;Sauropsida;Sauria;Archelosauria;Archosauria;Crocodylia;Longirostres;Gavialidae;Gavialinae;Gavialis;Gavialis gangeticus
UniRef100_UPI00092F6163	1	UPI00092F6163	zinc finger CCCH domain-containing protein 6 isoform X2	1191	7-1122	6.4e-198	661.1	Gavialis gangeticus (Indian gharial)	94835	cellular organisms;Eukaryota;Opisthokonta;Metazoa;Eumetazoa;Bilateria;Deuterostomia;Chordata;Craniata;Vertebrata;Gnathostomata;Teleostomi;Euteleostomi;Sarcopterygii;Dipnotetrapodomorpha;Tetrapoda;Amniota;Sauropsida;Sauria;Archelosauria;Archosauria;Crocodylia;Longirostres;Gavialidae;Gavialinae;Gavialis;Gavialis gangeticus
UniRef100_UPI000938F942	1	UPI000938F942	zinc finger CCCH domain-containing protein 6	1192	15-1123	1.6e-197	659.8	Crocodylus porosus (Saltwater crocodile) (Estuarine crocodile)	8502	cellular organisms;Eukaryota;Opisthokonta;Metazoa;Eumetazoa;Bilateria;Deuterostomia;Chordata;Craniata;Vertebrata;Gnathostomata;Teleostomi;Euteleostomi;Sarcopterygii;Dipnotetrapodomorpha;Tetrapoda;Amniota;Sauropsida;Sauria;Archelosauria;Archosauria;Crocodylia;Longirostres;Crocodylidae;Crocodylus;Crocodylus porosus
UniRef100_UPI0011D00FCF	2	UPI0011D00FCF	zinc finger CCCH domain-containing protein 6 isoform X1	1207	1-1139	9.4e-201	670.5	Strigops habroptila (Kakapo)	2489341	cellular organisms;Eukaryota;Opisthokonta;Metazoa;Eumetazoa;Bilateria;Deuterostomia;Chordata;Craniata;Vertebrata;Gnathostomata;Teleostomi;Euteleostomi;Sarcopterygii;Dipnotetrapodomorpha;Tetrapoda;Amniota;Sauropsida;Sauria;Archelosauria;Archosauria;Dinosauria;Saurischia;Theropoda;Coelurosauria;Aves;Neognathae;Psittaciformes;Psittacidae;Strigops;Strigops habroptila
UniRef100_UPI000523C0A1	1	UPI000523C0A1	zinc finger CCCH domain-containing protein 6	988	4-921	5e-143	479.6	Nestor notabilis (Kea)	176057	cellular organisms;Eukaryota;Opisthokonta;Metazoa;Eumetazoa;Bilateria;Deuterostomia;Chordata;Craniata;Vertebrata;Gnathostomata;Teleostomi;Euteleostomi;Sarcopterygii;Dipnotetrapodomorpha;Tetrapoda;Amniota;Sauropsida;Sauria;Archelosauria;Archosauria;Dinosauria;Saurischia;Theropoda;Coelurosauria;Aves;Neognathae;Psittaciformes;Psittacidae;Nestor;Nestor notabilis
UniRef100_A0A091S0R4	1	A0A091S0R4	Zinc finger CCCH domain-containing protein 6 (Fragment)	987	4-920	3.7e-141	473.3	Nestor notabilis (Kea)	176057	cellular organisms;Eukaryota;Opisthokonta;Metazoa;Eumetazoa;Bilateria;Deuterostomia;Chordata;Craniata;Vertebrata;Gnathostomata;Teleostomi;Euteleostomi;Sarcopterygii;Dipnotetrapodomorpha;Tetrapoda;Amniota;Sauropsida;Sauria;Archelosauria;Archosauria;Dinosauria;Saurischia;Theropoda;Coelurosauria;Aves;Neognathae;Psittaciformes;Psittacidae;Nestor;Nestor notabilis
UniRef100_UPI000661C0F1	1	UPI000661C0F1	zinc finger CCCH domain-containing protein 6	1176	3-1109	1.3e-192	643.6	Melopsittacus undulatus (Budgerigar) (Psittacus undulatus)	13146	cellular organisms;Eukaryota;Opisthokonta;Metazoa;Eumetazoa;Bilateria;Deuterostomia;Chordata;Craniata;Vertebrata;Gnathostomata;Teleostomi;Euteleostomi;Sarcopterygii;Dipnotetrapodomorpha;Tetrapoda;Amniota;Sauropsida;Sauria;Archelosauria;Archosauria;Dinosauria;Saurischia;Theropoda;Coelurosauria;Aves;Neognathae;Psittaciformes;Psittaculidae;Melopsittacus;Melopsittacus undulatus
UniRef100_UPI00052160BE	1	UPI00052160BE	zinc finger CCCH domain-containing protein 6-like	1210	1-1152	6.3e-187	624.8	Dryobates pubescens (Downy woodpecker) (Picoides pubescens)	118200	cellular organisms;Eukaryota;Opisthokonta;Metazoa;Eumetazoa;Bilateria;Deuterostomia;Chordata;Craniata;Vertebrata;Gnathostomata;Teleostomi;Euteleostomi;Sarcopterygii;Dipnotetrapodomorpha;Tetrapoda;Amniota;Sauropsida;Sauria;Archelosauria;Archosauria;Dinosauria;Saurischia;Theropoda;Coelurosauria;Aves;Neognathae;Piciformes;Picidae;Picoides;Picoides pubescens
UniRef100_A0A093GP37	1	A0A093GP37	Zinc finger CCCH domain-containing protein 6 (Fragment)	1188	2-1130	5.2e-185	618.4	Dryobates pubescens (Downy woodpecker) (Picoides pubescens)	118200	cellular organisms;Eukaryota;Opisthokonta;Metazoa;Eumetazoa;Bilateria;Deuterostomia;Chordata;Craniata;Vertebrata;Gnathostomata;Teleostomi;Euteleostomi;Sarcopterygii;Dipnotetrapodomorpha;Tetrapoda;Amniota;Sauropsida;Sauria;Archelosauria;Archosauria;Dinosauria;Saurischia;Theropoda;Coelurosauria;Aves;Neognathae;Piciformes;Picidae;Picoides;Picoides pubescens
UniRef100_UPI0005214AA4	1	UPI0005214AA4	zinc finger CCCH domain-containing protein 6	1168	1-1110	5.6e-199	664.6	Apaloderma vittatum (Bar-tailed trogon)	57397	cellular organisms;Eukaryota;Opisthokonta;Metazoa;Eumetazoa;Bilateria;Deuterostomia;Chordata;Craniata;Vertebrata;Gnathostomata;Teleostomi;Euteleostomi;Sarcopterygii;Dipnotetrapodomorpha;Tetrapoda;Amniota;Sauropsida;Sauria;Archelosauria;Archosauria;Dinosauria;Saurischia;Theropoda;Coelurosauria;Aves;Neognathae;Trogoniformes;Trogonidae;Apaloderma;Apaloderma vittatum
UniRef100_A0A091NDW7	1	A0A091NDW7	Zinc finger CCCH domain-containing protein 6 (Fragment)	1157	2-1099	3.7e-195	652.0	Apaloderma vittatum (Bar-tailed trogon)	57397	cellular organisms;Eukaryota;Opisthokonta;Metazoa;Eumetazoa;Bilateria;Deuterostomia;Chordata;Craniata;Vertebrata;Gnathostomata;Teleostomi;Euteleostomi;Sarcopterygii;Dipnotetrapodomorpha;Tetrapoda;Amniota;Sauropsida;Sauria;Archelosauria;Archosauria;Dinosauria;Saurischia;Theropoda;Coelurosauria;Aves;Neognathae;Trogoniformes;Trogonidae;Apaloderma;Apaloderma vittatum
UniRef100_UPI00051C66C7	1	UPI00051C66C7	LOW QUALITY PROTEIN: zinc finger CCCH domain-containing protein 6-like	1191	1-1133	1.3e-197	660.2	Cuculus canorus (common cuckoo)	55661	cellular organisms;Eukaryota;Opisthokonta;Metazoa;Eumetazoa;Bilateria;Deuterostomia;Chordata;Craniata;Vertebrata;Gnathostomata;Teleostomi;Euteleostomi;Sarcopterygii;Dipnotetrapodomorpha;Tetrapoda;Amniota;Sauropsida;Sauria;Archelosauria;Archosauria;Dinosauria;Saurischia;Theropoda;Coelurosauria;Aves;Neognathae;Cuculiformes;Cuculidae;Cuculus;Cuculus canorus
UniRef100_UPI0011C34F66	1	UPI0011C34F66	LOW QUALITY PROTEIN: zinc finger CCCH domain-containing protein 6	1212	1-1151	2.2e-196	656.1	Calypte anna (Anna's hummingbird) (Archilochus anna)	9244	cellular organisms;Eukaryota;Opisthokonta;Metazoa;Eumetazoa;Bilateria;Deuterostomia;Chordata;Craniata;Vertebrata;Gnathostomata;Teleostomi;Euteleostomi;Sarcopterygii;Dipnotetrapodomorpha;Tetrapoda;Amniota;Sauropsida;Sauria;Archelosauria;Archosauria;Dinosauria;Saurischia;Theropoda;Coelurosauria;Aves;Neognathae;Apodiformes;Trochilidae;Calypte;Calypte anna
UniRef100_A0A091IBH4	1	A0A091IBH4	Zinc finger CCCH domain-containing protein 6 (Fragment)	1191	2-1130	5.6e-193	644.8	Calypte anna (Anna's hummingbird) (Archilochus anna)	9244	cellular organisms;Eukaryota;Opisthokonta;Metazoa;Eumetazoa;Bilateria;Deuterostomia;Chordata;Craniata;Vertebrata;Gnathostomata;Teleostomi;Euteleostomi;Sarcopterygii;Dipnotetrapodomorpha;Tetrapoda;Amniota;Sauropsida;Sauria;Archelosauria;Archosauria;Dinosauria;Saurischia;Theropoda;Coelurosauria;Aves;Neognathae;Apodiformes;Trochilidae;Calypte;Calypte anna
UniRef100_A0A094N2R5	1	A0A094N2R5	Zinc finger CCCH domain-containing protein 6 (Fragment)	1178	2-1118	4.8e-188	628.5	Podiceps cristatus (Great crested grebe)	345573	cellular organisms;Eukaryota;Opisthokonta;Metazoa;Eumetazoa;Bilateria;Deuterostomia;Chordata;Craniata;Vertebrata;Gnathostomata;Teleostomi;Euteleostomi;Sarcopterygii;Dipnotetrapodomorpha;Tetrapoda;Amniota;Sauropsida;Sauria;Archelosauria;Archosauria;Dinosauria;Saurischia;Theropoda;Coelurosauria;Aves;Neognathae;Podicipediformes;Podicipedidae;Podiceps;Podiceps cristatus
UniRef100_UPI000A393657	1	UPI000A393657	LOW QUALITY PROTEIN: zinc finger CCCH domain-containing protein 6	1107	1-1058	1.3e-189	633.6	Columba livia (Rock dove)	8932	cellular organisms;Eukaryota;Opisthokonta;Metazoa;Eumetazoa;Bilateria;Deuterostomia;Chordata;Craniata;Vertebrata;Gnathostomata;Teleostomi;Euteleostomi;Sarcopterygii;Dipnotetrapodomorpha;Tetrapoda;Amniota;Sauropsida;Sauria;Archelosauria;Archosauria;Dinosauria;Saurischia;Theropoda;Coelurosauria;Aves;Neognathae;Columbiformes;Columbidae;Columba;Columba livia
UniRef100_A0A2I0M9G9	1	A0A2I0M9G9	Zinc finger CCCH-type containing 6	1058	1-1053	1.2e-188	630.4	Columba livia (Rock dove)	8932	cellular organisms;Eukaryota;Opisthokonta;Metazoa;Eumetazoa;Bilateria;Deuterostomia;Chordata;Craniata;Vertebrata;Gnathostomata;Teleostomi;Euteleostomi;Sarcopterygii;Dipnotetrapodomorpha;Tetrapoda;Amniota;Sauropsida;Sauria;Archelosauria;Archosauria;Dinosauria;Saurischia;Theropoda;Coelurosauria;Aves;Neognathae;Columbiformes;Columbidae;Columba;Columba livia
UniRef100_A0A1V4IGJ0	1	A0A1V4IGJ0	Zinc finger CCCH domain-containing protein 6	708	3-657	4.2e-109	367.3	Patagioenas fasciata monilis	372326	cellular organisms;Eukaryota;Opisthokonta;Metazoa;Eumetazoa;Bilateria;Deuterostomia;Chordata;Craniata;Vertebrata;Gnathostomata;Teleostomi;Euteleostomi;Sarcopterygii;Dipnotetrapodomorpha;Tetrapoda;Amniota;Sauropsida;Sauria;Archelosauria;Archosauria;Dinosauria;Saurischia;Theropoda;Coelurosauria;Aves;Neognathae;Columbiformes;Columbidae;Patagioenas;Patagioenas fasciata;Patagioenas fasciata monilis
UniRef100_UPI000528A051	1	UPI000528A051	zinc finger CCCH domain-containing protein 6	821	6-821	9.7e-139	465.4	Buceros rhinoceros silvestris	175836	cellular organisms;Eukaryota;Opisthokonta;Metazoa;Eumetazoa;Bilateria;Deuterostomia;Chordata;Craniata;Vertebrata;Gnathostomata;Teleostomi;Euteleostomi;Sarcopterygii;Dipnotetrapodomorpha;Tetrapoda;Amniota;Sauropsida;Sauria;Archelosauria;Archosauria;Dinosauria;Saurischia;Theropoda;Coelurosauria;Aves;Neognathae;Bucerotiformes;Bucerotidae;Buceros;Buceros rhinoceros;Buceros rhinoceros silvestris
UniRef100_A0A091GLT6	1	A0A091GLT6	Zinc finger CCCH domain-containing protein 6 (Fragment)	822	2-820	2.3e-135	454.2	Buceros rhinoceros silvestris	175836	cellular organisms;Eukaryota;Opisthokonta;Metazoa;Eumetazoa;Bilateria;Deuterostomia;Chordata;Craniata;Vertebrata;Gnathostomata;Teleostomi;Euteleostomi;Sarcopterygii;Dipnotetrapodomorpha;Tetrapoda;Amniota;Sauropsida;Sauria;Archelosauria;Archosauria;Dinosauria;Saurischia;Theropoda;Coelurosauria;Aves;Neognathae;Bucerotiformes;Bucerotidae;Buceros;Buceros rhinoceros;Buceros rhinoceros silvestris
UniRef100_UPI0007715849	1	UPI0007715849	zinc finger CCCH domain-containing protein 6	1202	1-1138	5.3e-197	658.1	Parus major (Great tit)	9157	cellular organisms;Eukaryota;Opisthokonta;Metazoa;Eumetazoa;Bilateria;Deuterostomia;Chordata;Craniata;Vertebrata;Gnathostomata;Teleostomi;Euteleostomi;Sarcopterygii;Dipnotetrapodomorpha;Tetrapoda;Amniota;Sauropsida;Sauria;Archelosauria;Archosauria;Dinosauria;Saurischia;Theropoda;Coelurosauria;Aves;Neognathae;Passeriformes;Paridae;Parus;Parus major
UniRef100_UPI000CDB10E4	1	UPI000CDB10E4	zinc finger CCCH domain-containing protein 6	1202	1-1138	1.4e-196	656.8	Cyanistes caeruleus (Eurasian blue tit) (Parus caeruleus)	156563	cellular organisms;Eukaryota;Opisthokonta;Metazoa;Eumetazoa;Bilateria;Deuterostomia;Chordata;Craniata;Vertebrata;Gnathostomata;Teleostomi;Euteleostomi;Sarcopterygii;Dipnotetrapodomorpha;Tetrapoda;Amniota;Sauropsida;Sauria;Archelosauria;Archosauria;Dinosauria;Saurischia;Theropoda;Coelurosauria;Aves;Neognathae;Passeriformes;Paridae;Cyanistes;Cyanistes caeruleus
UniRef100_UPI0003955B55	1	UPI0003955B55	zinc finger CCCH domain-containing protein 6 isoform X1	1202	1-1138	1.4e-196	656.7	Pseudopodoces humilis (Tibetan ground jay) (Podoces humilis)	181119	cellular organisms;Eukaryota;Opisthokonta;Metazoa;Eumetazoa;Bilateria;Deuterostomia;Chordata;Craniata;Vertebrata;Gnathostomata;Teleostomi;Euteleostomi;Sarcopterygii;Dipnotetrapodomorpha;Tetrapoda;Amniota;Sauropsida;Sauria;Archelosauria;Archosauria;Dinosauria;Saurischia;Theropoda;Coelurosauria;Aves;Neognathae;Passeriformes;Paridae;Pseudopodoces;Pseudopodoces humilis
UniRef100_UPI0006B78673	1	UPI0006B78673	zinc finger CCCH domain-containing protein 6 isoform X2	1188	1-1138	1.4e-196	656.7	Pseudopodoces humilis (Tibetan ground jay) (Podoces humilis)	181119	cellular organisms;Eukaryota;Opisthokonta;Metazoa;Eumetazoa;Bilateria;Deuterostomia;Chordata;Craniata;Vertebrata;Gnathostomata;Teleostomi;Euteleostomi;Sarcopterygii;Dipnotetrapodomorpha;Tetrapoda;Amniota;Sauropsida;Sauria;Archelosauria;Archosauria;Dinosauria;Saurischia;Theropoda;Coelurosauria;Aves;Neognathae;Passeriformes;Paridae;Pseudopodoces;Pseudopodoces humilis
UniRef100_UPI00071A917E	1	UPI00071A917E	zinc finger CCCH domain-containing protein 6	1205	1-1146	2e-195	652.9	Sturnus vulgaris (Starling)	9172	cellular organisms;Eukaryota;Opisthokonta;Metazoa;Eumetazoa;Bilateria;Deuterostomia;Chordata;Craniata;Vertebrata;Gnathostomata;Teleostomi;Euteleostomi;Sarcopterygii;Dipnotetrapodomorpha;Tetrapoda;Amniota;Sauropsida;Sauria;Archelosauria;Archosauria;Dinosauria;Saurischia;Theropoda;Coelurosauria;Aves;Neognathae;Passeriformes;Sturnidae;Sturnus;Sturnus vulgaris
UniRef100_UPI0005348B66	1	UPI0005348B66	zinc finger CCCH domain-containing protein 6	1204	1-1146	9e-197	657.3	Corvus cornix cornix	932674	cellular organisms;Eukaryota;Opisthokonta;Metazoa;Eumetazoa;Bilateria;Deuterostomia;Chordata;Craniata;Vertebrata;Gnathostomata;Teleostomi;Euteleostomi;Sarcopterygii;Dipnotetrapodomorpha;Tetrapoda;Amniota;Sauropsida;Sauria;Archelosauria;Archosauria;Dinosauria;Saurischia;Theropoda;Coelurosauria;Aves;Neognathae;Passeriformes;Corvoidea;Corvidae;Corvus;Corvus cornix;Corvus cornix cornix
UniRef100_UPI0004DDF9B8	1	UPI0004DDF9B8	zinc finger CCCH domain-containing protein 6	1204	1-1146	5.1e-196	654.8	Corvus brachyrhynchos (American crow)	85066	cellular organisms;Eukaryota;Opisthokonta;Metazoa;Eumetazoa;Bilateria;Deuterostomia;Chordata;Craniata;Vertebrata;Gnathostomata;Teleostomi;Euteleostomi;Sarcopterygii;Dipnotetrapodomorpha;Tetrapoda;Amniota;Sauropsida;Sauria;Archelosauria;Archosauria;Dinosauria;Saurischia;Theropoda;Coelurosauria;Aves;Neognathae;Passeriformes;Corvoidea;Corvidae;Corvus;Corvus brachyrhynchos
UniRef100_A0A091EKG4	1	A0A091EKG4	Zinc finger CCCH domain-containing protein 6 (Fragment)	1172	2-1114	3.1e-185	619.2	Corvus brachyrhynchos (American crow)	85066	cellular organisms;Eukaryota;Opisthokonta;Metazoa;Eumetazoa;Bilateria;Deuterostomia;Chordata;Craniata;Vertebrata;Gnathostomata;Teleostomi;Euteleostomi;Sarcopterygii;Dipnotetrapodomorpha;Tetrapoda;Amniota;Sauropsida;Sauria;Archelosauria;Archosauria;Dinosauria;Saurischia;Theropoda;Coelurosauria;Aves;Neognathae;Passeriformes;Corvoidea;Corvidae;Corvus;Corvus brachyrhynchos
UniRef100_UPI0003959A75	1	UPI0003959A75	LOW QUALITY PROTEIN: zinc finger CCCH domain-containing protein 6	1204	1-1146	3.2e-195	652.2	Geospiza parvula (Small tree-finch) (Camarhynchus parvulus)	87175	cellular organisms;Eukaryota;Opisthokonta;Metazoa;Eumetazoa;Bilateria;Deuterostomia;Chordata;Craniata;Vertebrata;Gnathostomata;Teleostomi;Euteleostomi;Sarcopterygii;Dipnotetrapodomorpha;Tetrapoda;Amniota;Sauropsida;Sauria;Archelosauria;Archosauria;Dinosauria;Saurischia;Theropoda;Coelurosauria;Aves;Neognathae;Passeriformes;Thraupidae;Camarhynchus;Camarhynchus parvulus
UniRef100_UPI00124380E8	1	UPI00124380E8	zinc finger CCCH domain-containing protein 6 isoform X1	1210	1-1152	1.2e-194	650.3	Geospiza fortis (Medium ground-finch)	48883	cellular organisms;Eukaryota;Opisthokonta;Metazoa;Eumetazoa;Bilateria;Deuterostomia;Chordata;Craniata;Vertebrata;Gnathostomata;Teleostomi;Euteleostomi;Sarcopterygii;Dipnotetrapodomorpha;Tetrapoda;Amniota;Sauropsida;Sauria;Archelosauria;Archosauria;Dinosauria;Saurischia;Theropoda;Coelurosauria;Aves;Neognathae;Passeriformes;Thraupidae;Geospiza;Geospiza fortis
UniRef100_UPI000194BE9B	1	UPI000194BE9B	zinc finger CCCH domain-containing protein 6 isoform X2	1204	1-1145	7e-196	654.4	Taeniopygia guttata (Zebra finch) (Poephila guttata)	59729	cellular organisms;Eukaryota;Opisthokonta;Metazoa;Eumetazoa;Bilateria;Deuterostomia;Chordata;Craniata;Vertebrata;Gnathostomata;Teleostomi;Euteleostomi;Sarcopterygii;Dipnotetrapodomorpha;Tetrapoda;Amniota;Sauropsida;Sauria;Archelosauria;Archosauria;Dinosauria;Saurischia;Theropoda;Coelurosauria;Aves;Neognathae;Passeriformes;Passeroidea;Estrildidae;Estrildinae;Taeniopygia;Taeniopygia guttata
UniRef100_UPI00063C1D34	2	UPI00063C1D34	zinc finger CCCH domain-containing protein 6 isoform X1	1210	1-1151	2.6e-195	652.5	Taeniopygia guttata (Zebra finch) (Poephila guttata)	59729	cellular organisms;Eukaryota;Opisthokonta;Metazoa;Eumetazoa;Bilateria;Deuterostomia;Chordata;Craniata;Vertebrata;Gnathostomata;Teleostomi;Euteleostomi;Sarcopterygii;Dipnotetrapodomorpha;Tetrapoda;Amniota;Sauropsida;Sauria;Archelosauria;Archosauria;Dinosauria;Saurischia;Theropoda;Coelurosauria;Aves;Neognathae;Passeriformes;Passeroidea;Estrildidae;Estrildinae;Taeniopygia;Taeniopygia guttata
UniRef100_H0ZAU4	1	H0ZAU4	Zinc finger CCCH-type containing 6	1181	5-1122	6.2e-188	628.1	Taeniopygia guttata (Zebra finch) (Poephila guttata)	59729	cellular organisms;Eukaryota;Opisthokonta;Metazoa;Eumetazoa;Bilateria;Deuterostomia;Chordata;Craniata;Vertebrata;Gnathostomata;Teleostomi;Euteleostomi;Sarcopterygii;Dipnotetrapodomorpha;Tetrapoda;Amniota;Sauropsida;Sauria;Archelosauria;Archosauria;Dinosauria;Saurischia;Theropoda;Coelurosauria;Aves;Neognathae;Passeriformes;Passeroidea;Estrildidae;Estrildinae;Taeniopygia;Taeniopygia guttata
UniRef100_A0A218UI18	1	A0A218UI18	Zinc finger CCCH domain-containing protein 6	1204	1-1135	2.5e-195	652.6	Lonchura striata domestica (Bengalese finch)	299123	cellular organisms;Eukaryota;Opisthokonta;Metazoa;Eumetazoa;Bilateria;Deuterostomia;Chordata;Craniata;Vertebrata;Gnathostomata;Teleostomi;Euteleostomi;Sarcopterygii;Dipnotetrapodomorpha;Tetrapoda;Amniota;Sauropsida;Sauria;Archelosauria;Archosauria;Dinosauria;Saurischia;Theropoda;Coelurosauria;Aves;Neognathae;Passeriformes;Passeroidea;Estrildidae;Estrildinae;Lonchura;Lonchura striata;Lonchura stri…
UniRef100_UPI000B4D440F	1	UPI000B4D440F	zinc finger CCCH domain-containing protein 6 isoform X2	1186	1-1135	2.3e-195	652.7	Lonchura striata domestica (Bengalese finch)	299123	cellular organisms;Eukaryota;Opisthokonta;Metazoa;Eumetazoa;Bilateria;Deuterostomia;Chordata;Craniata;Vertebrata;Gnathostomata;Teleostomi;Euteleostomi;Sarcopterygii;Dipnotetrapodomorpha;Tetrapoda;Amniota;Sauropsida;Sauria;Archelosauria;Archosauria;Dinosauria;Saurischia;Theropoda;Coelurosauria;Aves;Neognathae;Passeriformes;Passeroidea;Estrildidae;Estrildinae;Lonchura;Lonchura striata;Lonchura stri…
UniRef100_A0A3L8SSE6	1	A0A3L8SSE6	Uncharacterized protein	1252	72-1194	2.1e-167	560.2	Chloebia gouldiae (Gouldian finch) (Erythrura gouldiae)	44316	cellular organisms;Eukaryota;Opisthokonta;Metazoa;Eumetazoa;Bilateria;Deuterostomia;Chordata;Craniata;Vertebrata;Gnathostomata;Teleostomi;Euteleostomi;Sarcopterygii;Dipnotetrapodomorpha;Tetrapoda;Amniota;Sauropsida;Sauria;Archelosauria;Archosauria;Dinosauria;Saurischia;Theropoda;Coelurosauria;Aves;Neognathae;Passeriformes;Passeroidea;Estrildidae;Erythrura;Erythrura gouldiae
UniRef100_UPI0004F11F1E	1	UPI0004F11F1E	zinc finger CCCH domain-containing protein 6 isoform X1	1204	1-1135	7.6e-197	657.6	Serinus canaria (Island canary) (Fringilla canaria)	9135	cellular organisms;Eukaryota;Opisthokonta;Metazoa;Eumetazoa;Bilateria;Deuterostomia;Chordata;Craniata;Vertebrata;Gnathostomata;Teleostomi;Euteleostomi;Sarcopterygii;Dipnotetrapodomorpha;Tetrapoda;Amniota;Sauropsida;Sauria;Archelosauria;Archosauria;Dinosauria;Saurischia;Theropoda;Coelurosauria;Aves;Neognathae;Passeriformes;Passeroidea;Fringillidae;Carduelinae;Serinus;Serinus canaria
UniRef100_UPI0008DB4F94	1	UPI0008DB4F94	zinc finger CCCH domain-containing protein 6 isoform X2	1210	1-1141	2.8e-196	655.7	Serinus canaria (Island canary) (Fringilla canaria)	9135	cellular organisms;Eukaryota;Opisthokonta;Metazoa;Eumetazoa;Bilateria;Deuterostomia;Chordata;Craniata;Vertebrata;Gnathostomata;Teleostomi;Euteleostomi;Sarcopterygii;Dipnotetrapodomorpha;Tetrapoda;Amniota;Sauropsida;Sauria;Archelosauria;Archosauria;Dinosauria;Saurischia;Theropoda;Coelurosauria;Aves;Neognathae;Passeriformes;Passeroidea;Fringillidae;Carduelinae;Serinus;Serinus canaria
UniRef100_UPI0003941B90	1	UPI0003941B90	zinc finger CCCH domain-containing protein 6	1204	1-1146	4e-195	651.9	Zonotrichia albicollis (White-throated sparrow)	44394	cellular organisms;Eukaryota;Opisthokonta;Metazoa;Eumetazoa;Bilateria;Deuterostomia;Chordata;Craniata;Vertebrata;Gnathostomata;Teleostomi;Euteleostomi;Sarcopterygii;Dipnotetrapodomorpha;Tetrapoda;Amniota;Sauropsida;Sauria;Archelosauria;Archosauria;Dinosauria;Saurischia;Theropoda;Coelurosauria;Aves;Neognathae;Passeriformes;Passerellidae;Zonotrichia;Zonotrichia albicollis
UniRef100_UPI0003592F6F	1	UPI0003592F6F	zinc finger CCCH domain-containing protein 6	1204	1-1146	9e-197	657.3	Ficedula albicollis (Collared flycatcher) (Muscicapa albicollis)	59894	cellular organisms;Eukaryota;Opisthokonta;Metazoa;Eumetazoa;Bilateria;Deuterostomia;Chordata;Craniata;Vertebrata;Gnathostomata;Teleostomi;Euteleostomi;Sarcopterygii;Dipnotetrapodomorpha;Tetrapoda;Amniota;Sauropsida;Sauria;Archelosauria;Archosauria;Dinosauria;Saurischia;Theropoda;Coelurosauria;Aves;Neognathae;Passeriformes;Muscicapidae;Ficedula;Ficedula albicollis
UniRef100_U3KAQ6	1	U3KAQ6	Zinc finger CCCH-type containing 6	1184	12-1126	3e-194	649.0	Ficedula albicollis (Collared flycatcher) (Muscicapa albicollis)	59894	cellular organisms;Eukaryota;Opisthokonta;Metazoa;Eumetazoa;Bilateria;Deuterostomia;Chordata;Craniata;Vertebrata;Gnathostomata;Teleostomi;Euteleostomi;Sarcopterygii;Dipnotetrapodomorpha;Tetrapoda;Amniota;Sauropsida;Sauria;Archelosauria;Archosauria;Dinosauria;Saurischia;Theropoda;Coelurosauria;Aves;Neognathae;Passeriformes;Muscicapidae;Ficedula;Ficedula albicollis
UniRef100_UPI000FCD104D	2	UPI000FCD104D	zinc finger CCCH domain-containing protein 6 isoform X1	1203	1-1139	1.1e-196	657.1	Neopelma chrysocephalum (saffron-crested tyrant-manakin)	114329	cellular organisms;Eukaryota;Opisthokonta;Metazoa;Eumetazoa;Bilateria;Deuterostomia;Chordata;Craniata;Vertebrata;Gnathostomata;Teleostomi;Euteleostomi;Sarcopterygii;Dipnotetrapodomorpha;Tetrapoda;Amniota;Sauropsida;Sauria;Archelosauria;Archosauria;Dinosauria;Saurischia;Theropoda;Coelurosauria;Aves;Neognathae;Passeriformes;Pipridae;Neopelma;Neopelma chrysocephalum
UniRef100_UPI00081A2403	1	UPI00081A2403	zinc finger CCCH domain-containing protein 6	1203	1-1134	4.9e-196	654.9	Lepidothrix coronata (blue-crowned manakin)	321398	cellular organisms;Eukaryota;Opisthokonta;Metazoa;Eumetazoa;Bilateria;Deuterostomia;Chordata;Craniata;Vertebrata;Gnathostomata;Teleostomi;Euteleostomi;Sarcopterygii;Dipnotetrapodomorpha;Tetrapoda;Amniota;Sauropsida;Sauria;Archelosauria;Archosauria;Dinosauria;Saurischia;Theropoda;Coelurosauria;Aves;Neognathae;Passeriformes;Pipridae;Lepidothrix;Lepidothrix coronata
UniRef100_UPI000FD671DD	1	UPI000FD671DD	zinc finger CCCH domain-containing protein 6	1191	20-1122	1e-189	634.0	Corapipo altera (White-ruffed manakin)	415028	cellular organisms;Eukaryota;Opisthokonta;Metazoa;Eumetazoa;Bilateria;Deuterostomia;Chordata;Craniata;Vertebrata;Gnathostomata;Teleostomi;Euteleostomi;Sarcopterygii;Dipnotetrapodomorpha;Tetrapoda;Amniota;Sauropsida;Sauria;Archelosauria;Archosauria;Dinosauria;Saurischia;Theropoda;Coelurosauria;Aves;Neognathae;Passeriformes;Pipridae;Corapipo;Corapipo altera
UniRef100_UPI00115D009A	1	UPI00115D009A	zinc finger CCCH domain-containing protein 6	1095	4-1026	7e-169	565.1	Manacus vitellinus (golden-collared manakin)	328815	cellular organisms;Eukaryota;Opisthokonta;Metazoa;Eumetazoa;Bilateria;Deuterostomia;Chordata;Craniata;Vertebrata;Gnathostomata;Teleostomi;Euteleostomi;Sarcopterygii;Dipnotetrapodomorpha;Tetrapoda;Amniota;Sauropsida;Sauria;Archelosauria;Archosauria;Dinosauria;Saurischia;Theropoda;Coelurosauria;Aves;Neognathae;Passeriformes;Pipridae;Manacus;Manacus vitellinus
UniRef100_UPI000FE1E9CE	1	UPI000FE1E9CE	zinc finger CCCH domain-containing protein 6	1095	4-1026	6.3e-169	565.2	Pipra filicauda (Wire-tailed manakin)	649802	cellular organisms;Eukaryota;Opisthokonta;Metazoa;Eumetazoa;Bilateria;Deuterostomia;Chordata;Craniata;Vertebrata;Gnathostomata;Teleostomi;Euteleostomi;Sarcopterygii;Dipnotetrapodomorpha;Tetrapoda;Amniota;Sauropsida;Sauria;Archelosauria;Archosauria;Dinosauria;Saurischia;Theropoda;Coelurosauria;Aves;Neognathae;Passeriformes;Pipridae;Pipra;Pipra filicauda
UniRef100_UPI000FFCF470	2	UPI000FFCF470	zinc finger CCCH domain-containing protein 6 isoform X1	1203	1-1143	3e-196	655.6	Empidonax traillii (Willow flycatcher)	164674	cellular organisms;Eukaryota;Opisthokonta;Metazoa;Eumetazoa;Bilateria;Deuterostomia;Chordata;Craniata;Vertebrata;Gnathostomata;Teleostomi;Euteleostomi;Sarcopterygii;Dipnotetrapodomorpha;Tetrapoda;Amniota;Sauropsida;Sauria;Archelosauria;Archosauria;Dinosauria;Saurischia;Theropoda;Coelurosauria;Aves;Neognathae;Passeriformes;Tyrannidae;Empidonax;Empidonax traillii
UniRef100_UPI0004F0C91C	1	UPI0004F0C91C	zinc finger CCCH domain-containing protein 6	1203	1-1145	1.4e-193	646.8	Acanthisitta chloris (rifleman)	57068	cellular organisms;Eukaryota;Opisthokonta;Metazoa;Eumetazoa;Bilateria;Deuterostomia;Chordata;Craniata;Vertebrata;Gnathostomata;Teleostomi;Euteleostomi;Sarcopterygii;Dipnotetrapodomorpha;Tetrapoda;Amniota;Sauropsida;Sauria;Archelosauria;Archosauria;Dinosauria;Saurischia;Theropoda;Coelurosauria;Aves;Neognathae;Passeriformes;Acanthisittidae;Acanthisitta;Acanthisitta chloris
UniRef100_A0A091MPC9	1	A0A091MPC9	Zinc finger CCCH domain-containing protein 6 (Fragment)	1177	2-1119	2.2e-187	626.3	Acanthisitta chloris (rifleman)	57068	cellular organisms;Eukaryota;Opisthokonta;Metazoa;Eumetazoa;Bilateria;Deuterostomia;Chordata;Craniata;Vertebrata;Gnathostomata;Teleostomi;Euteleostomi;Sarcopterygii;Dipnotetrapodomorpha;Tetrapoda;Amniota;Sauropsida;Sauria;Archelosauria;Archosauria;Dinosauria;Saurischia;Theropoda;Coelurosauria;Aves;Neognathae;Passeriformes;Acanthisittidae;Acanthisitta;Acanthisitta chloris
UniRef100_UPI0005286EF5	1	UPI0005286EF5	zinc finger CCCH domain-containing protein 6	1179	1-1120	9.2e-191	637.5	Pterocles gutturalis (yellow-throated sandgrouse)	240206	cellular organisms;Eukaryota;Opisthokonta;Metazoa;Eumetazoa;Bilateria;Deuterostomia;Chordata;Craniata;Vertebrata;Gnathostomata;Teleostomi;Euteleostomi;Sarcopterygii;Dipnotetrapodomorpha;Tetrapoda;Amniota;Sauropsida;Sauria;Archelosauria;Archosauria;Dinosauria;Saurischia;Theropoda;Coelurosauria;Aves;Neognathae;Ciconiiformes;Pteroclidae;Pterocles;Pterocles gutturalis
UniRef100_A0A093ELD4	1	A0A093ELD4	Zinc finger CCCH domain-containing protein 6 (Fragment)	1192	2-1133	4.5e-190	635.2	Pterocles gutturalis (yellow-throated sandgrouse)	240206	cellular organisms;Eukaryota;Opisthokonta;Metazoa;Eumetazoa;Bilateria;Deuterostomia;Chordata;Craniata;Vertebrata;Gnathostomata;Teleostomi;Euteleostomi;Sarcopterygii;Dipnotetrapodomorpha;Tetrapoda;Amniota;Sauropsida;Sauria;Archelosauria;Archosauria;Dinosauria;Saurischia;Theropoda;Coelurosauria;Aves;Neognathae;Ciconiiformes;Pteroclidae;Pterocles;Pterocles gutturalis
UniRef100_UPI0010A98BD4	1	UPI0010A98BD4	zinc finger CCCH domain-containing protein 6-like	569	1-410	1.6e-121	408.4	Antrostomus carolinensis (Chuck-will's-widow) (Caprimulgus carolinensis)	279965	cellular organisms;Eukaryota;Opisthokonta;Metazoa;Eumetazoa;Bilateria;Deuterostomia;Chordata;Craniata;Vertebrata;Gnathostomata;Teleostomi;Euteleostomi;Sarcopterygii;Dipnotetrapodomorpha;Tetrapoda;Amniota;Sauropsida;Sauria;Archelosauria;Archosauria;Dinosauria;Saurischia;Theropoda;Coelurosauria;Aves;Neognathae;Caprimulgiformes;Caprimulgidae;Antrostomus;Antrostomus carolinensis
UniRef100_UPI000529E271	1	UPI000529E271	zinc finger CCCH domain-containing protein 6	1210	1-1152	4.6e-197	658.3	Chlamydotis macqueenii (Macqueen's bustard)	187382	cellular organisms;Eukaryota;Opisthokonta;Metazoa;Eumetazoa;Bilateria;Deuterostomia;Chordata;Craniata;Vertebrata;Gnathostomata;Teleostomi;Euteleostomi;Sarcopterygii;Dipnotetrapodomorpha;Tetrapoda;Amniota;Sauropsida;Sauria;Archelosauria;Archosauria;Dinosauria;Saurischia;Theropoda;Coelurosauria;Aves;Neognathae;Gruiformes;Otididae;Chlamydotis;Chlamydotis macqueenii
UniRef100_A0A091KL23	1	A0A091KL23	Zinc finger CCCH domain-containing protein 6 (Fragment)	1192	2-1134	4.2e-192	641.9	Chlamydotis macqueenii (Macqueen's bustard)	187382	cellular organisms;Eukaryota;Opisthokonta;Metazoa;Eumetazoa;Bilateria;Deuterostomia;Chordata;Craniata;Vertebrata;Gnathostomata;Teleostomi;Euteleostomi;Sarcopterygii;Dipnotetrapodomorpha;Tetrapoda;Amniota;Sauropsida;Sauria;Archelosauria;Archosauria;Dinosauria;Saurischia;Theropoda;Coelurosauria;Aves;Neognathae;Gruiformes;Otididae;Chlamydotis;Chlamydotis macqueenii
UniRef100_UPI0005294E7A	1	UPI0005294E7A	zinc finger CCCH domain-containing protein 6	1210	1-1151	1.1e-194	650.4	Eurypyga helias (Sunbittern)	54383	cellular organisms;Eukaryota;Opisthokonta;Metazoa;Eumetazoa;Bilateria;Deuterostomia;Chordata;Craniata;Vertebrata;Gnathostomata;Teleostomi;Euteleostomi;Sarcopterygii;Dipnotetrapodomorpha;Tetrapoda;Amniota;Sauropsida;Sauria;Archelosauria;Archosauria;Dinosauria;Saurischia;Theropoda;Coelurosauria;Aves;Neognathae;Gruiformes;Eurypygidae;Eurypyga;Eurypyga helias
UniRef100_A0A093KX74	1	A0A093KX74	Zinc finger CCCH domain-containing protein 6 (Fragment)	1188	2-1129	1e-190	637.3	Eurypyga helias (Sunbittern)	54383	cellular organisms;Eukaryota;Opisthokonta;Metazoa;Eumetazoa;Bilateria;Deuterostomia;Chordata;Craniata;Vertebrata;Gnathostomata;Teleostomi;Euteleostomi;Sarcopterygii;Dipnotetrapodomorpha;Tetrapoda;Amniota;Sauropsida;Sauria;Archelosauria;Archosauria;Dinosauria;Saurischia;Theropoda;Coelurosauria;Aves;Neognathae;Gruiformes;Eurypygidae;Eurypyga;Eurypyga helias
UniRef100_UPI0005108777	1	UPI0005108777	zinc finger CCCH domain-containing protein 6-like	1210	1-1149	1.4e-196	656.7	Nipponia nippon (Crested ibis) (Ibis nippon)	128390	cellular organisms;Eukaryota;Opisthokonta;Metazoa;Eumetazoa;Bilateria;Deuterostomia;Chordata;Craniata;Vertebrata;Gnathostomata;Teleostomi;Euteleostomi;Sarcopterygii;Dipnotetrapodomorpha;Tetrapoda;Amniota;Sauropsida;Sauria;Archelosauria;Archosauria;Dinosauria;Saurischia;Theropoda;Coelurosauria;Aves;Neognathae;Pelecaniformes;Threskiornithidae;Nipponia;Nipponia nippon
UniRef100_UPI0005325EB0	1	UPI0005325EB0	zinc finger CCCH domain-containing protein 6	1192	13-1122	5.6e-188	628.3	Balearica regulorum gibbericeps (East African grey crowned-crane)	100784	cellular organisms;Eukaryota;Opisthokonta;Metazoa;Eumetazoa;Bilateria;Deuterostomia;Chordata;Craniata;Vertebrata;Gnathostomata;Teleostomi;Euteleostomi;Sarcopterygii;Dipnotetrapodomorpha;Tetrapoda;Amniota;Sauropsida;Sauria;Archelosauria;Archosauria;Dinosauria;Saurischia;Theropoda;Coelurosauria;Aves;Neognathae;Gruiformes;Gruidae;Balearica;Balearica regulorum;Balearica regulorum gibbericeps
UniRef100_A0A087V467	1	A0A087V467	Zinc finger CCCH domain-containing protein 6 (Fragment)	1189	2-1119	2.1e-187	626.4	Balearica regulorum gibbericeps (East African grey crowned-crane)	100784	cellular organisms;Eukaryota;Opisthokonta;Metazoa;Eumetazoa;Bilateria;Deuterostomia;Chordata;Craniata;Vertebrata;Gnathostomata;Teleostomi;Euteleostomi;Sarcopterygii;Dipnotetrapodomorpha;Tetrapoda;Amniota;Sauropsida;Sauria;Archelosauria;Archosauria;Dinosauria;Saurischia;Theropoda;Coelurosauria;Aves;Neognathae;Gruiformes;Gruidae;Balearica;Balearica regulorum;Balearica regulorum gibbericeps
UniRef100_UPI0004F4DE05	1	UPI0004F4DE05	LOW QUALITY PROTEIN: zinc finger CCCH domain-containing protein 6-like	1217	1-1156	2.3e-196	656.0	Pygoscelis adeliae (Adelie penguin)	9238	cellular organisms;Eukaryota;Opisthokonta;Metazoa;Eumetazoa;Bilateria;Deuterostomia;Chordata;Craniata;Vertebrata;Gnathostomata;Teleostomi;Euteleostomi;Sarcopterygii;Dipnotetrapodomorpha;Tetrapoda;Amniota;Sauropsida;Sauria;Archelosauria;Archosauria;Dinosauria;Saurischia;Theropoda;Coelurosauria;Aves;Neognathae;Sphenisciformes;Spheniscidae;Pygoscelis;Pygoscelis adeliae
UniRef100_A0A093P8D5	1	A0A093P8D5	Zinc finger CCCH domain-containing protein 6 (Fragment)	1175	2-1114	5.2e-187	625.1	Pygoscelis adeliae (Adelie penguin)	9238	cellular organisms;Eukaryota;Opisthokonta;Metazoa;Eumetazoa;Bilateria;Deuterostomia;Chordata;Craniata;Vertebrata;Gnathostomata;Teleostomi;Euteleostomi;Sarcopterygii;Dipnotetrapodomorpha;Tetrapoda;Amniota;Sauropsida;Sauria;Archelosauria;Archosauria;Dinosauria;Saurischia;Theropoda;Coelurosauria;Aves;Neognathae;Sphenisciformes;Spheniscidae;Pygoscelis;Pygoscelis adeliae
UniRef100_UPI0006B6EEFD	1	UPI0006B6EEFD	LOW QUALITY PROTEIN: zinc finger CCCH domain-containing protein 6	1219	1-1150	1.4e-198	663.3	Falco cherrug (Saker falcon)	345164	cellular organisms;Eukaryota;Opisthokonta;Metazoa;Eumetazoa;Bilateria;Deuterostomia;Chordata;Craniata;Vertebrata;Gnathostomata;Teleostomi;Euteleostomi;Sarcopterygii;Dipnotetrapodomorpha;Tetrapoda;Amniota;Sauropsida;Sauria;Archelosauria;Archosauria;Dinosauria;Saurischia;Theropoda;Coelurosauria;Aves;Neognathae;Falconiformes;Falconidae;Falco;Falco cherrug
UniRef100_UPI000678D150	1	UPI000678D150	LOW QUALITY PROTEIN: zinc finger CCCH domain-containing protein 6	1218	1-1150	6.6e-198	661.1	Falco peregrinus (Peregrine falcon)	8954	cellular organisms;Eukaryota;Opisthokonta;Metazoa;Eumetazoa;Bilateria;Deuterostomia;Chordata;Craniata;Vertebrata;Gnathostomata;Teleostomi;Euteleostomi;Sarcopterygii;Dipnotetrapodomorpha;Tetrapoda;Amniota;Sauropsida;Sauria;Archelosauria;Archosauria;Dinosauria;Saurischia;Theropoda;Coelurosauria;Aves;Neognathae;Falconiformes;Falconidae;Falco;Falco peregrinus
UniRef100_UPI0005235937	1	UPI0005235937	zinc finger CCCH domain-containing protein 8	347	3-345	1.8e-115	388.4	Tauraco erythrolophus (Red-crested turaco)	121530	cellular organisms;Eukaryota;Opisthokonta;Metazoa;Eumetazoa;Bilateria;Deuterostomia;Chordata;Craniata;Vertebrata;Gnathostomata;Teleostomi;Euteleostomi;Sarcopterygii;Dipnotetrapodomorpha;Tetrapoda;Amniota;Sauropsida;Sauria;Archelosauria;Archosauria;Dinosauria;Saurischia;Theropoda;Coelurosauria;Aves;Neognathae;Musophagiformes;Musophagidae;Tauraco;Tauraco erythrolophus
UniRef100_UPI0005296E18	1	UPI0005296E18	zinc finger CCCH domain-containing protein 6-like	480	1-379	7.1e-118	396.3	Colius striatus (Speckled mousebird)	57412	cellular organisms;Eukaryota;Opisthokonta;Metazoa;Eumetazoa;Bilateria;Deuterostomia;Chordata;Craniata;Vertebrata;Gnathostomata;Teleostomi;Euteleostomi;Sarcopterygii;Dipnotetrapodomorpha;Tetrapoda;Amniota;Sauropsida;Sauria;Archelosauria;Archosauria;Dinosauria;Saurischia;Theropoda;Coelurosauria;Aves;Neognathae;Coliiformes;Coliidae;Colius;Colius striatus
UniRef100_UPI000520B531	1	UPI000520B531	zinc finger CCCH domain-containing protein 6	1179	1-1120	8.5e-190	634.3	Gavia stellata (Red-throated diver) (Red-throated loon)	37040	cellular organisms;Eukaryota;Opisthokonta;Metazoa;Eumetazoa;Bilateria;Deuterostomia;Chordata;Craniata;Vertebrata;Gnathostomata;Teleostomi;Euteleostomi;Sarcopterygii;Dipnotetrapodomorpha;Tetrapoda;Amniota;Sauropsida;Sauria;Archelosauria;Archosauria;Dinosauria;Saurischia;Theropoda;Coelurosauria;Aves;Neognathae;Gaviiformes;Gaviidae;Gavia;Gavia stellata
UniRef100_A0A093HF69	1	A0A093HF69	Zinc finger CCCH domain-containing protein 6 (Fragment)	1182	2-1123	4.3e-181	605.5	Gavia stellata (Red-throated diver) (Red-throated loon)	37040	cellular organisms;Eukaryota;Opisthokonta;Metazoa;Eumetazoa;Bilateria;Deuterostomia;Chordata;Craniata;Vertebrata;Gnathostomata;Teleostomi;Euteleostomi;Sarcopterygii;Dipnotetrapodomorpha;Tetrapoda;Amniota;Sauropsida;Sauria;Archelosauria;Archosauria;Dinosauria;Saurischia;Theropoda;Coelurosauria;Aves;Neognathae;Gaviiformes;Gaviidae;Gavia;Gavia stellata
UniRef100_UPI00051F0DA5	1	UPI00051F0DA5	zinc finger CCCH domain-containing protein 6	1208	1-1148	8.4e-188	627.7	Egretta garzetta (Little egret)	188379	cellular organisms;Eukaryota;Opisthokonta;Metazoa;Eumetazoa;Bilateria;Deuterostomia;Chordata;Craniata;Vertebrata;Gnathostomata;Teleostomi;Euteleostomi;Sarcopterygii;Dipnotetrapodomorpha;Tetrapoda;Amniota;Sauropsida;Sauria;Archelosauria;Archosauria;Dinosauria;Saurischia;Theropoda;Coelurosauria;Aves;Neognathae;Pelecaniformes;Ardeidae;Egretta;Egretta garzetta
UniRef100_A0A091JQ59	1	A0A091JQ59	Zinc finger CCCH domain-containing protein 6 (Fragment)	1186	2-1126	5.6e-183	611.7	Egretta garzetta (Little egret)	188379	cellular organisms;Eukaryota;Opisthokonta;Metazoa;Eumetazoa;Bilateria;Deuterostomia;Chordata;Craniata;Vertebrata;Gnathostomata;Teleostomi;Euteleostomi;Sarcopterygii;Dipnotetrapodomorpha;Tetrapoda;Amniota;Sauropsida;Sauria;Archelosauria;Archosauria;Dinosauria;Saurischia;Theropoda;Coelurosauria;Aves;Neognathae;Pelecaniformes;Ardeidae;Egretta;Egretta garzetta
UniRef100_UPI0004F02DF8	1	UPI0004F02DF8	zinc finger CCCH domain-containing protein 6-like	341	1-341	1.7e-113	381.9	Merops nubicus (Northern carmine bee-eater)	57421	cellular organisms;Eukaryota;Opisthokonta;Metazoa;Eumetazoa;Bilateria;Deuterostomia;Chordata;Craniata;Vertebrata;Gnathostomata;Teleostomi;Euteleostomi;Sarcopterygii;Dipnotetrapodomorpha;Tetrapoda;Amniota;Sauropsida;Sauria;Archelosauria;Archosauria;Dinosauria;Saurischia;Theropoda;Coelurosauria;Aves;Neognathae;Coraciiformes;Meropidae;Merops;Merops nubicus
UniRef100_UPI0005224038	1	UPI0005224038	LOW QUALITY PROTEIN: zinc finger CCCH domain-containing protein 6-like	1200	1-1141	9.9e-199	663.8	Opisthocomus hoazin (Hoatzin) (Phasianus hoazin)	30419	cellular organisms;Eukaryota;Opisthokonta;Metazoa;Eumetazoa;Bilateria;Deuterostomia;Chordata;Craniata;Vertebrata;Gnathostomata;Teleostomi;Euteleostomi;Sarcopterygii;Dipnotetrapodomorpha;Tetrapoda;Amniota;Sauropsida;Sauria;Archelosauria;Archosauria;Dinosauria;Saurischia;Theropoda;Coelurosauria;Aves;Neognathae;Opisthocomiformes;Opisthocomidae;Opisthocomus;Opisthocomus hoazin
UniRef100_UPI0005151D24	1	UPI0005151D24	zinc finger CCCH domain-containing protein 6	1158	1-1100	2.6e-194	649.2	Phalacrocorax carbo (Great cormorant) (Pelecanus carbo)	9209	cellular organisms;Eukaryota;Opisthokonta;Metazoa;Eumetazoa;Bilateria;Deuterostomia;Chordata;Craniata;Vertebrata;Gnathostomata;Teleostomi;Euteleostomi;Sarcopterygii;Dipnotetrapodomorpha;Tetrapoda;Amniota;Sauropsida;Sauria;Archelosauria;Archosauria;Dinosauria;Saurischia;Theropoda;Coelurosauria;Aves;Neognathae;Pelecaniformes;Phalacrocoracidae;Phalacrocorax;Phalacrocorax carbo
UniRef100_A0A093TG31	1	A0A093TG31	Zinc finger CCCH domain-containing protein 6 (Fragment)	1156	8-1098	2.2e-186	623.0	Phalacrocorax carbo (Great cormorant) (Pelecanus carbo)	9209	cellular organisms;Eukaryota;Opisthokonta;Metazoa;Eumetazoa;Bilateria;Deuterostomia;Chordata;Craniata;Vertebrata;Gnathostomata;Teleostomi;Euteleostomi;Sarcopterygii;Dipnotetrapodomorpha;Tetrapoda;Amniota;Sauropsida;Sauria;Archelosauria;Archosauria;Dinosauria;Saurischia;Theropoda;Coelurosauria;Aves;Neognathae;Pelecaniformes;Phalacrocoracidae;Phalacrocorax;Phalacrocorax carbo
UniRef100_UPI0005D0CF11	1	UPI0005D0CF11	zinc finger CCCH domain-containing protein 6-like	694	1-657	3.9e-102	344.3	Aquila chrysaetos canadensis	216574	cellular organisms;Eukaryota;Opisthokonta;Metazoa;Eumetazoa;Bilateria;Deuterostomia;Chordata;Craniata;Vertebrata;Gnathostomata;Teleostomi;Euteleostomi;Sarcopterygii;Dipnotetrapodomorpha;Tetrapoda;Amniota;Sauropsida;Sauria;Archelosauria;Archosauria;Dinosauria;Saurischia;Theropoda;Coelurosauria;Aves;Neognathae;Accipitriformes;Accipitridae;Accipitrinae;Aquila;Aquila chrysaetos;Aquila chrysaetos cana…
UniRef100_A0A093I469	1	A0A093I469	Zinc finger CCCH domain-containing protein 6 (Fragment)	1186	2-1128	3.7e-194	648.7	Fulmarus glacialis (Northern fulmar)	30455	cellular organisms;Eukaryota;Opisthokonta;Metazoa;Eumetazoa;Bilateria;Deuterostomia;Chordata;Craniata;Vertebrata;Gnathostomata;Teleostomi;Euteleostomi;Sarcopterygii;Dipnotetrapodomorpha;Tetrapoda;Amniota;Sauropsida;Sauria;Archelosauria;Archosauria;Dinosauria;Saurischia;Theropoda;Coelurosauria;Aves;Neognathae;Procellariiformes;Procellariidae;Fulmarus;Fulmarus glacialis
UniRef100_UPI00051B7664	1	UPI00051B7664	zinc finger CCCH domain-containing protein 6	1067	1-1009	7.4e-165	551.8	Fulmarus glacialis (Northern fulmar)	30455	cellular organisms;Eukaryota;Opisthokonta;Metazoa;Eumetazoa;Bilateria;Deuterostomia;Chordata;Craniata;Vertebrata;Gnathostomata;Teleostomi;Euteleostomi;Sarcopterygii;Dipnotetrapodomorpha;Tetrapoda;Amniota;Sauropsida;Sauria;Archelosauria;Archosauria;Dinosauria;Saurischia;Theropoda;Coelurosauria;Aves;Neognathae;Procellariiformes;Procellariidae;Fulmarus;Fulmarus glacialis
UniRef100_UPI0005307D31	1	UPI0005307D31	LOW QUALITY PROTEIN: zinc finger CCCH domain-containing protein 6-like	1183	1-1114	4.5e-194	648.4	Phaethon lepturus (White-tailed tropicbird)	97097	cellular organisms;Eukaryota;Opisthokonta;Metazoa;Eumetazoa;Bilateria;Deuterostomia;Chordata;Craniata;Vertebrata;Gnathostomata;Teleostomi;Euteleostomi;Sarcopterygii;Dipnotetrapodomorpha;Tetrapoda;Amniota;Sauropsida;Sauria;Archelosauria;Archosauria;Dinosauria;Saurischia;Theropoda;Coelurosauria;Aves;Neognathae;Pelecaniformes;Phaethontidae;Phaethon;Phaethon lepturus
UniRef100_A0A091TLN2	1	A0A091TLN2	Zinc finger CCCH domain-containing protein 6 (Fragment)	1178	2-1109	2e-190	636.3	Phaethon lepturus (White-tailed tropicbird)	97097	cellular organisms;Eukaryota;Opisthokonta;Metazoa;Eumetazoa;Bilateria;Deuterostomia;Chordata;Craniata;Vertebrata;Gnathostomata;Teleostomi;Euteleostomi;Sarcopterygii;Dipnotetrapodomorpha;Tetrapoda;Amniota;Sauropsida;Sauria;Archelosauria;Archosauria;Dinosauria;Saurischia;Theropoda;Coelurosauria;Aves;Neognathae;Pelecaniformes;Phaethontidae;Phaethon;Phaethon lepturus
UniRef100_UPI00052891C6	1	UPI00052891C6	zinc finger CCCH domain-containing protein 6	974	2-905	2.5e-140	470.6	Mesitornis unicolor (brown roatelo)	54374	cellular organisms;Eukaryota;Opisthokonta;Metazoa;Eumetazoa;Bilateria;Deuterostomia;Chordata;Craniata;Vertebrata;Gnathostomata;Teleostomi;Euteleostomi;Sarcopterygii;Dipnotetrapodomorpha;Tetrapoda;Amniota;Sauropsida;Sauria;Archelosauria;Archosauria;Dinosauria;Saurischia;Theropoda;Coelurosauria;Aves;Neognathae;Gruiformes;Mesitornithidae;Mesitornis;Mesitornis unicolor
UniRef100_A0A091QQR4	1	A0A091QQR4	Zinc finger CCCH domain-containing protein 6 (Fragment)	987	4-918	3.1e-135	453.8	Mesitornis unicolor (brown roatelo)	54374	cellular organisms;Eukaryota;Opisthokonta;Metazoa;Eumetazoa;Bilateria;Deuterostomia;Chordata;Craniata;Vertebrata;Gnathostomata;Teleostomi;Euteleostomi;Sarcopterygii;Dipnotetrapodomorpha;Tetrapoda;Amniota;Sauropsida;Sauria;Archelosauria;Archosauria;Dinosauria;Saurischia;Theropoda;Coelurosauria;Aves;Neognathae;Gruiformes;Mesitornithidae;Mesitornis;Mesitornis unicolor
UniRef100_UPI0005200B16	1	UPI0005200B16	zinc finger CCCH domain-containing protein 6	1207	1-1138	2.3e-192	642.8	Cariama cristata (Red-legged seriema)	54380	cellular organisms;Eukaryota;Opisthokonta;Metazoa;Eumetazoa;Bilateria;Deuterostomia;Chordata;Craniata;Vertebrata;Gnathostomata;Teleostomi;Euteleostomi;Sarcopterygii;Dipnotetrapodomorpha;Tetrapoda;Amniota;Sauropsida;Sauria;Archelosauria;Archosauria;Dinosauria;Saurischia;Theropoda;Coelurosauria;Aves;Neognathae;Cariamiformes;Cariamidae;Cariama;Cariama cristata
UniRef100_A0A091MHP3	1	A0A091MHP3	Zinc finger CCCH domain-containing protein 6 (Fragment)	1185	2-1116	3.1e-189	632.4	Cariama cristata (Red-legged seriema)	54380	cellular organisms;Eukaryota;Opisthokonta;Metazoa;Eumetazoa;Bilateria;Deuterostomia;Chordata;Craniata;Vertebrata;Gnathostomata;Teleostomi;Euteleostomi;Sarcopterygii;Dipnotetrapodomorpha;Tetrapoda;Amniota;Sauropsida;Sauria;Archelosauria;Archosauria;Dinosauria;Saurischia;Theropoda;Coelurosauria;Aves;Neognathae;Cariamiformes;Cariamidae;Cariama;Cariama cristata
UniRef100_UPI0011772891	1	UPI0011772891	LOW QUALITY PROTEIN: zinc finger CCCH domain-containing protein 6	1210	1-1151	1.6e-194	649.9	Aquila chrysaetos chrysaetos	223781	cellular organisms;Eukaryota;Opisthokonta;Metazoa;Eumetazoa;Bilateria;Deuterostomia;Chordata;Craniata;Vertebrata;Gnathostomata;Teleostomi;Euteleostomi;Sarcopterygii;Dipnotetrapodomorpha;Tetrapoda;Amniota;Sauropsida;Sauria;Archelosauria;Archosauria;Dinosauria;Saurischia;Theropoda;Coelurosauria;Aves;Neognathae;Accipitriformes;Accipitridae;Accipitrinae;Aquila;Aquila chrysaetos;Aquila chrysaetos chry…
UniRef100_UPI000EF649CD	1	UPI000EF649CD	zinc finger CCCH domain-containing protein 6	1186	8-1127	3.9e-195	651.9	Athene cunicularia (Burrowing owl) (Speotyto cunicularia)	194338	cellular organisms;Eukaryota;Opisthokonta;Metazoa;Eumetazoa;Bilateria;Deuterostomia;Chordata;Craniata;Vertebrata;Gnathostomata;Teleostomi;Euteleostomi;Sarcopterygii;Dipnotetrapodomorpha;Tetrapoda;Amniota;Sauropsida;Sauria;Archelosauria;Archosauria;Dinosauria;Saurischia;Theropoda;Coelurosauria;Aves;Neognathae;Strigiformes;Strigidae;Athene;Athene cunicularia
UniRef100_UPI00052322DC	1	UPI00052322DC	LOW QUALITY PROTEIN: zinc finger CCCH domain-containing protein 6	1178	1-1119	6.8e-191	637.9	Tyto alba (Barn owl)	56313	cellular organisms;Eukaryota;Opisthokonta;Metazoa;Eumetazoa;Bilateria;Deuterostomia;Chordata;Craniata;Vertebrata;Gnathostomata;Teleostomi;Euteleostomi;Sarcopterygii;Dipnotetrapodomorpha;Tetrapoda;Amniota;Sauropsida;Sauria;Archelosauria;Archosauria;Dinosauria;Saurischia;Theropoda;Coelurosauria;Aves;Neognathae;Strigiformes;Tytonidae;Tyto;Tyto alba
UniRef100_E2RFS8	1	E2RFS8	Zinc finger CCCH-type containing 8	307	1-298	2.1e-109	368.3	Canis lupus familiaris (Dog) (Canis familiaris)	9615	cellular organisms;Eukaryota;Opisthokonta;Metazoa;Eumetazoa;Bilateria;Deuterostomia;Chordata;Craniata;Vertebrata;Gnathostomata;Teleostomi;Euteleostomi;Sarcopterygii;Dipnotetrapodomorpha;Tetrapoda;Amniota;Mammalia;Theria;Eutheria;Boreoeutheria;Laurasiatheria;Carnivora;Caniformia;Canidae;Canis;Canis lupus;Canis lupus familiaris
UniRef100_A0A5F4CM01	2	A0A5F4CM01	Zinc finger CCCH-type containing 8	393	89-386	5.1e-109	367.0	Canis lupus familiaris (Dog) (Canis familiaris)	9612	cellular organisms;Eukaryota;Opisthokonta;Metazoa;Eumetazoa;Bilateria;Deuterostomia;Chordata;Craniata;Vertebrata;Gnathostomata;Teleostomi;Euteleostomi;Sarcopterygii;Dipnotetrapodomorpha;Tetrapoda;Amniota;Mammalia;Theria;Eutheria;Boreoeutheria;Laurasiatheria;Carnivora;Caniformia;Canidae;Canis;Canis lupus
UniRef100_UPI000BAA088D	1	UPI000BAA088D	zinc finger CCCH domain-containing protein 8 isoform X1	331	48-324	1.4e-105	355.7	Canis lupus familiaris (Dog) (Canis familiaris)	9615	cellular organisms;Eukaryota;Opisthokonta;Metazoa;Eumetazoa;Bilateria;Deuterostomia;Chordata;Craniata;Vertebrata;Gnathostomata;Teleostomi;Euteleostomi;Sarcopterygii;Dipnotetrapodomorpha;Tetrapoda;Amniota;Mammalia;Theria;Eutheria;Boreoeutheria;Laurasiatheria;Carnivora;Caniformia;Canidae;Canis;Canis lupus;Canis lupus familiaris
UniRef100_A0A3Q7T5Q0	1	A0A3Q7T5Q0	zinc finger CCCH domain-containing protein 8	305	1-298	5.3e-109	367.0	Vulpes vulpes (Red fox)	9627	cellular organisms;Eukaryota;Opisthokonta;Metazoa;Eumetazoa;Bilateria;Deuterostomia;Chordata;Craniata;Vertebrata;Gnathostomata;Teleostomi;Euteleostomi;Sarcopterygii;Dipnotetrapodomorpha;Tetrapoda;Amniota;Mammalia;Theria;Eutheria;Boreoeutheria;Laurasiatheria;Carnivora;Caniformia;Canidae;Vulpes;Vulpes vulpes
UniRef100_A0A3Q7NRS8	1	A0A3Q7NRS8	zinc finger CCCH domain-containing protein 8	305	1-298	3.3e-108	364.4	Callorhinus ursinus (Northern fur seal)	34884	cellular organisms;Eukaryota;Opisthokonta;Metazoa;Eumetazoa;Bilateria;Deuterostomia;Chordata;Craniata;Vertebrata;Gnathostomata;Teleostomi;Euteleostomi;Sarcopterygii;Dipnotetrapodomorpha;Tetrapoda;Amniota;Mammalia;Theria;Eutheria;Boreoeutheria;Laurasiatheria;Carnivora;Caniformia;Otariidae;Callorhinus;Callorhinus ursinus
UniRef100_A0A2U3VWT6	1	A0A2U3VWT6	zinc finger CCCH domain-containing protein 8	305	1-298	6.6e-108	363.4	Odobenus rosmarus divergens (Pacific walrus)	9708	cellular organisms;Eukaryota;Opisthokonta;Metazoa;Eumetazoa;Bilateria;Deuterostomia;Chordata;Craniata;Vertebrata;Gnathostomata;Teleostomi;Euteleostomi;Sarcopterygii;Dipnotetrapodomorpha;Tetrapoda;Amniota;Mammalia;Theria;Eutheria;Boreoeutheria;Laurasiatheria;Carnivora;Caniformia;Odobenidae;Odobenus;Odobenus rosmarus;Odobenus rosmarus divergens
UniRef100_UPI000F7FD1E7	2	UPI000F7FD1E7	zinc finger CCCH domain-containing protein 8	305	1-297	1.5e-107	362.2	Zalophus californianus (California sealion)	9702	cellular organisms;Eukaryota;Opisthokonta;Metazoa;Eumetazoa;Bilateria;Deuterostomia;Chordata;Craniata;Vertebrata;Gnathostomata;Teleostomi;Euteleostomi;Sarcopterygii;Dipnotetrapodomorpha;Tetrapoda;Amniota;Mammalia;Theria;Eutheria;Boreoeutheria;Laurasiatheria;Carnivora;Caniformia;Otariidae
UniRef100_A0A2U3Y0X3	1	A0A2U3Y0X3	zinc finger CCCH domain-containing protein 8	305	1-298	4.5e-108	363.9	Leptonychotes weddellii (Weddell seal) (Otaria weddellii)	9713	cellular organisms;Eukaryota;Opisthokonta;Metazoa;Eumetazoa;Bilateria;Deuterostomia;Chordata;Craniata;Vertebrata;Gnathostomata;Teleostomi;Euteleostomi;Sarcopterygii;Dipnotetrapodomorpha;Tetrapoda;Amniota;Mammalia;Theria;Eutheria;Boreoeutheria;Laurasiatheria;Carnivora;Caniformia;Phocidae;Leptonychotes;Leptonychotes weddellii
UniRef100_A0A2Y9HN86	1	A0A2Y9HN86	zinc finger CCCH domain-containing protein 8	305	1-298	1.4e-106	358.9	Neomonachus schauinslandi (Hawaiian monk seal) (Monachus schauinslandi)	29088	cellular organisms;Eukaryota;Opisthokonta;Metazoa;Eumetazoa;Bilateria;Deuterostomia;Chordata;Craniata;Vertebrata;Gnathostomata;Teleostomi;Euteleostomi;Sarcopterygii;Dipnotetrapodomorpha;Tetrapoda;Amniota;Mammalia;Theria;Eutheria;Boreoeutheria;Laurasiatheria;Carnivora;Caniformia;Phocidae;Neomonachus;Neomonachus schauinslandi
UniRef100_A0A3Q7UJA8	1	A0A3Q7UJA8	zinc finger CCCH domain-containing protein 8 isoform X1	305	1-297	3.9e-105	354.2	Ursus arctos horribilis	116960	cellular organisms;Eukaryota;Opisthokonta;Metazoa;Eumetazoa;Bilateria;Deuterostomia;Chordata;Craniata;Vertebrata;Gnathostomata;Teleostomi;Euteleostomi;Sarcopterygii;Dipnotetrapodomorpha;Tetrapoda;Amniota;Mammalia;Theria;Eutheria;Boreoeutheria;Laurasiatheria;Carnivora;Caniformia;Ursidae;Ursus;Ursus arctos;Ursus arctos horribilis
UniRef100_A0A384CV37	1	A0A384CV37	Zinc finger CCCH-type containing 8	305	1-297	4.7e-104	350.6	Ursus maritimus (Polar bear) (Thalarctos maritimus)	29073	cellular organisms;Eukaryota;Opisthokonta;Metazoa;Eumetazoa;Bilateria;Deuterostomia;Chordata;Craniata;Vertebrata;Gnathostomata;Teleostomi;Euteleostomi;Sarcopterygii;Dipnotetrapodomorpha;Tetrapoda;Amniota;Mammalia;Theria;Eutheria;Boreoeutheria;Laurasiatheria;Carnivora;Caniformia;Ursidae;Ursus;Ursus maritimus
UniRef100_A0A3Q7UZZ3	1	A0A3Q7UZZ3	zinc finger CCCH domain-containing protein 8 isoform X2	304	1-296	2.6e-104	351.5	Ursus arctos horribilis	116960	cellular organisms;Eukaryota;Opisthokonta;Metazoa;Eumetazoa;Bilateria;Deuterostomia;Chordata;Craniata;Vertebrata;Gnathostomata;Teleostomi;Euteleostomi;Sarcopterygii;Dipnotetrapodomorpha;Tetrapoda;Amniota;Mammalia;Theria;Eutheria;Boreoeutheria;Laurasiatheria;Carnivora;Caniformia;Ursidae;Ursus;Ursus arctos;Ursus arctos horribilis
UniRef100_A0A452QDH3	1	A0A452QDH3	Zinc finger CCCH-type containing 8	307	1-297	8.1e-101	339.9	Ursus americanus (American black bear) (Euarctos americanus)	9643	cellular organisms;Eukaryota;Opisthokonta;Metazoa;Eumetazoa;Bilateria;Deuterostomia;Chordata;Craniata;Vertebrata;Gnathostomata;Teleostomi;Euteleostomi;Sarcopterygii;Dipnotetrapodomorpha;Tetrapoda;Amniota;Mammalia;Theria;Eutheria;Boreoeutheria;Laurasiatheria;Carnivora;Caniformia;Ursidae;Ursus;Ursus americanus
UniRef100_UPI0009478ECF	1	UPI0009478ECF	zinc finger CCCH domain-containing protein 8 isoform X2	304	1-296	3.5e-102	344.4	Ailuropoda melanoleuca (Giant panda)	9646	cellular organisms;Eukaryota;Opisthokonta;Metazoa;Eumetazoa;Bilateria;Deuterostomia;Chordata;Craniata;Vertebrata;Gnathostomata;Teleostomi;Euteleostomi;Sarcopterygii;Dipnotetrapodomorpha;Tetrapoda;Amniota;Mammalia;Theria;Eutheria;Boreoeutheria;Laurasiatheria;Carnivora;Caniformia;Ursidae;Ailuropoda;Ailuropoda melanoleuca
UniRef100_A0A3P4Q8R0	2	A0A3P4Q8R0	Uncharacterized protein	312	1-305	1.8e-104	352.0	Gulo gulo (Wolverine) (Gluton)	9655	cellular organisms;Eukaryota;Opisthokonta;Metazoa;Eumetazoa;Bilateria;Deuterostomia;Chordata;Craniata;Vertebrata;Gnathostomata;Teleostomi;Euteleostomi;Sarcopterygii;Dipnotetrapodomorpha;Tetrapoda;Amniota;Mammalia;Theria;Eutheria;Boreoeutheria;Laurasiatheria;Carnivora;Caniformia;Mustelidae
UniRef100_M3YDS8	2	M3YDS8	Zinc finger CCCH-type containing 8	311	1-304	1.8e-104	352.0	Mustela putorius furo (European domestic ferret) (Mustela furo)	9669	cellular organisms;Eukaryota;Opisthokonta;Metazoa;Eumetazoa;Bilateria;Deuterostomia;Chordata;Craniata;Vertebrata;Gnathostomata;Teleostomi;Euteleostomi;Sarcopterygii;Dipnotetrapodomorpha;Tetrapoda;Amniota;Mammalia;Theria;Eutheria;Boreoeutheria;Laurasiatheria;Carnivora;Caniformia;Mustelidae;Mustelinae;Mustela;Mustela putorius;Mustela putorius furo
UniRef100_UPI000DF4133B	1	UPI000DF4133B	zinc finger CCCH domain-containing protein 8	304	1-297	9.2e-103	346.3	Puma concolor (Mountain lion)	9696	cellular organisms;Eukaryota;Opisthokonta;Metazoa;Eumetazoa;Bilateria;Deuterostomia;Chordata;Craniata;Vertebrata;Gnathostomata;Teleostomi;Euteleostomi;Sarcopterygii;Dipnotetrapodomorpha;Tetrapoda;Amniota;Mammalia;Theria;Eutheria;Boreoeutheria;Laurasiatheria;Carnivora;Feliformia;Felidae;Felinae;Puma;Puma concolor
UniRef100_UPI000643C8FB	1	UPI000643C8FB	zinc finger CCCH domain-containing protein 8	319	1-300	4.3e-102	344.1	Microcebus murinus (Lesser mouse lemur) (Gray Mouse Lemur)	30608	cellular organisms;Eukaryota;Opisthokonta;Metazoa;Eumetazoa;Bilateria;Deuterostomia;Chordata;Craniata;Vertebrata;Gnathostomata;Teleostomi;Euteleostomi;Sarcopterygii;Dipnotetrapodomorpha;Tetrapoda;Amniota;Mammalia;Theria;Eutheria;Boreoeutheria;Euarchontoglires;Primates;Strepsirrhini;Lemuriformes;Cheirogaleidae;Microcebus;Microcebus murinus
UniRef100_UPI00072E669B	1	UPI00072E669B	zinc finger CCCH domain-containing protein 8 isoform X1	304	1-297	4.4e-102	344.1	Acinonyx jubatus (Cheetah)	32536	cellular organisms;Eukaryota;Opisthokonta;Metazoa;Eumetazoa;Bilateria;Deuterostomia;Chordata;Craniata;Vertebrata;Gnathostomata;Teleostomi;Euteleostomi;Sarcopterygii;Dipnotetrapodomorpha;Tetrapoda;Amniota;Mammalia;Theria;Eutheria;Boreoeutheria;Laurasiatheria;Carnivora;Feliformia;Felidae;Acinonychinae;Acinonyx;Acinonyx jubatus
UniRef100_UPI0011B04FEC	2	UPI0011B04FEC	zinc finger CCCH domain-containing protein 8 isoform X1	328	25-321	1.5e-102	345.6	Lynx canadensis (Canada lynx)	9681	cellular organisms;Eukaryota;Opisthokonta;Metazoa;Eumetazoa;Bilateria;Deuterostomia;Chordata;Craniata;Vertebrata;Gnathostomata;Teleostomi;Euteleostomi;Sarcopterygii;Dipnotetrapodomorpha;Tetrapoda;Amniota;Mammalia;Theria;Eutheria;Boreoeutheria;Laurasiatheria;Carnivora;Feliformia;Felidae
UniRef100_M3W8Y6	2	M3W8Y6	Zinc finger CCCH-type containing 8	311	1-299	4.4e-102	344.1	Felis catus (Cat) (Felis silvestris catus)	9685	cellular organisms;Eukaryota;Opisthokonta;Metazoa;Eumetazoa;Bilateria;Deuterostomia;Chordata;Craniata;Vertebrata;Gnathostomata;Teleostomi;Euteleostomi;Sarcopterygii;Dipnotetrapodomorpha;Tetrapoda;Amniota;Mammalia;Theria;Eutheria;Boreoeutheria;Laurasiatheria;Carnivora;Feliformia;Felidae;Felinae;Felis;Felis catus
UniRef100_UPI0002C687CC	1	UPI0002C687CC	zinc finger CCCH domain-containing protein 8 isoform X1	306	2-299	1.4e-101	342.4	Ceratotherium simum simum (southern white rhinoceros)	73337	cellular organisms;Eukaryota;Opisthokonta;Metazoa;Eumetazoa;Bilateria;Deuterostomia;Chordata;Craniata;Vertebrata;Gnathostomata;Teleostomi;Euteleostomi;Sarcopterygii;Dipnotetrapodomorpha;Tetrapoda;Amniota;Mammalia;Theria;Eutheria;Boreoeutheria;Laurasiatheria;Perissodactyla;Rhinocerotidae;Ceratotherium;Ceratotherium simum;Ceratotherium simum simum
UniRef100_UPI00053CD988	2	UPI00053CD988	zinc finger CCCH domain-containing protein 6-like isoform X1	1210	1-1150	2.2e-195	652.8	Haliaeetus leucocephalus (Bald eagle)	52644	cellular organisms;Eukaryota;Opisthokonta;Metazoa;Eumetazoa;Bilateria;Deuterostomia;Chordata;Craniata;Vertebrata;Gnathostomata;Teleostomi;Euteleostomi;Sarcopterygii;Dipnotetrapodomorpha;Tetrapoda;Amniota;Sauropsida;Sauria;Archelosauria;Archosauria;Dinosauria;Saurischia;Theropoda;Coelurosauria;Aves;Neognathae;Accipitriformes;Accipitridae;Accipitrinae;Haliaeetus;Haliaeetus leucocephalus
UniRef100_UPI00053CE6E2	1	UPI00053CE6E2	zinc finger CCCH domain-containing protein 6-like isoform X3	1199	1-1150	3.3e-195	652.2	Haliaeetus leucocephalus (Bald eagle)	52644	cellular organisms;Eukaryota;Opisthokonta;Metazoa;Eumetazoa;Bilateria;Deuterostomia;Chordata;Craniata;Vertebrata;Gnathostomata;Teleostomi;Euteleostomi;Sarcopterygii;Dipnotetrapodomorpha;Tetrapoda;Amniota;Sauropsida;Sauria;Archelosauria;Archosauria;Dinosauria;Saurischia;Theropoda;Coelurosauria;Aves;Neognathae;Accipitriformes;Accipitridae;Accipitrinae;Haliaeetus;Haliaeetus leucocephalus
UniRef100_UPI00053CD0FC	1	UPI00053CD0FC	zinc finger CCCH domain-containing protein 6-like isoform X2	1205	1-1150	1.9e-195	652.9	Haliaeetus leucocephalus (Bald eagle)	52644	cellular organisms;Eukaryota;Opisthokonta;Metazoa;Eumetazoa;Bilateria;Deuterostomia;Chordata;Craniata;Vertebrata;Gnathostomata;Teleostomi;Euteleostomi;Sarcopterygii;Dipnotetrapodomorpha;Tetrapoda;Amniota;Sauropsida;Sauria;Archelosauria;Archosauria;Dinosauria;Saurischia;Theropoda;Coelurosauria;Aves;Neognathae;Accipitriformes;Accipitridae;Accipitrinae;Haliaeetus;Haliaeetus leucocephalus
UniRef100_UPI00053CB154	1	UPI00053CB154	zinc finger CCCH domain-containing protein 6-like isoform X5	835	1-798	4.3e-137	459.9	Haliaeetus leucocephalus (Bald eagle)	52644	cellular organisms;Eukaryota;Opisthokonta;Metazoa;Eumetazoa;Bilateria;Deuterostomia;Chordata;Craniata;Vertebrata;Gnathostomata;Teleostomi;Euteleostomi;Sarcopterygii;Dipnotetrapodomorpha;Tetrapoda;Amniota;Sauropsida;Sauria;Archelosauria;Archosauria;Dinosauria;Saurischia;Theropoda;Coelurosauria;Aves;Neognathae;Accipitriformes;Accipitridae;Accipitrinae;Haliaeetus;Haliaeetus leucocephalus
UniRef100_UPI0005228B84	1	UPI0005228B84	LOW QUALITY PROTEIN: zinc finger CCCH domain-containing protein 6-like	966	2-911	7.4e-147	492.2	Haliaeetus albicilla (White-tailed sea-eagle) (Falco albicilla)	8969	cellular organisms;Eukaryota;Opisthokonta;Metazoa;Eumetazoa;Bilateria;Deuterostomia;Chordata;Craniata;Vertebrata;Gnathostomata;Teleostomi;Euteleostomi;Sarcopterygii;Dipnotetrapodomorpha;Tetrapoda;Amniota;Sauropsida;Sauria;Archelosauria;Archosauria;Dinosauria;Saurischia;Theropoda;Coelurosauria;Aves;Neognathae;Accipitriformes;Accipitridae;Accipitrinae;Haliaeetus;Haliaeetus albicilla
UniRef100_UPI00053CCF26	1	UPI00053CCF26	zinc finger CCCH domain-containing protein 6-like isoform X6	385	1-372	3.4e-119	400.7	Haliaeetus leucocephalus (Bald eagle)	52644	cellular organisms;Eukaryota;Opisthokonta;Metazoa;Eumetazoa;Bilateria;Deuterostomia;Chordata;Craniata;Vertebrata;Gnathostomata;Teleostomi;Euteleostomi;Sarcopterygii;Dipnotetrapodomorpha;Tetrapoda;Amniota;Sauropsida;Sauria;Archelosauria;Archosauria;Dinosauria;Saurischia;Theropoda;Coelurosauria;Aves;Neognathae;Accipitriformes;Accipitridae;Accipitrinae;Haliaeetus;Haliaeetus leucocephalus
UniRef100_UPI0005215DCE	1	UPI0005215DCE	LOW QUALITY PROTEIN: zinc finger CCCH domain-containing protein 6-like	1209	1-1151	2.5e-198	662.5	Charadrius vociferus (Killdeer) (Aegialitis vocifera)	50402	cellular organisms;Eukaryota;Opisthokonta;Metazoa;Eumetazoa;Bilateria;Deuterostomia;Chordata;Craniata;Vertebrata;Gnathostomata;Teleostomi;Euteleostomi;Sarcopterygii;Dipnotetrapodomorpha;Tetrapoda;Amniota;Sauropsida;Sauria;Archelosauria;Archosauria;Dinosauria;Saurischia;Theropoda;Coelurosauria;Aves;Neognathae;Charadriiformes;Charadriidae;Charadrius;Charadrius vociferus
UniRef100_A0A0A0AM73	1	A0A0A0AM73	Zinc finger CCCH domain-containing protein 6 (Fragment)	1172	2-1114	6.9e-188	627.9	Charadrius vociferus (Killdeer) (Aegialitis vocifera)	50402	cellular organisms;Eukaryota;Opisthokonta;Metazoa;Eumetazoa;Bilateria;Deuterostomia;Chordata;Craniata;Vertebrata;Gnathostomata;Teleostomi;Euteleostomi;Sarcopterygii;Dipnotetrapodomorpha;Tetrapoda;Amniota;Sauropsida;Sauria;Archelosauria;Archosauria;Dinosauria;Saurischia;Theropoda;Coelurosauria;Aves;Neognathae;Charadriiformes;Charadriidae;Charadrius;Charadrius vociferus
UniRef100_UPI00071DD09D	1	UPI00071DD09D	zinc finger CCCH domain-containing protein 6 isoform X1	1210	1-1151	1.4e-193	646.8	Calidris pugnax (Ruff) (Philomachus pugnax)	198806	cellular organisms;Eukaryota;Opisthokonta;Metazoa;Eumetazoa;Bilateria;Deuterostomia;Chordata;Craniata;Vertebrata;Gnathostomata;Teleostomi;Euteleostomi;Sarcopterygii;Dipnotetrapodomorpha;Tetrapoda;Amniota;Sauropsida;Sauria;Archelosauria;Archosauria;Dinosauria;Saurischia;Theropoda;Coelurosauria;Aves;Neognathae;Charadriiformes;Scolopacidae;Calidris;Calidris pugnax
UniRef100_UPI00071E2FCD	1	UPI00071E2FCD	zinc finger CCCH domain-containing protein 6 isoform X2	1123	3-1064	9.2e-175	584.5	Calidris pugnax (Ruff) (Philomachus pugnax)	198806	cellular organisms;Eukaryota;Opisthokonta;Metazoa;Eumetazoa;Bilateria;Deuterostomia;Chordata;Craniata;Vertebrata;Gnathostomata;Teleostomi;Euteleostomi;Sarcopterygii;Dipnotetrapodomorpha;Tetrapoda;Amniota;Sauropsida;Sauria;Archelosauria;Archosauria;Dinosauria;Saurischia;Theropoda;Coelurosauria;Aves;Neognathae;Charadriiformes;Scolopacidae;Calidris;Calidris pugnax
UniRef100_UPI0004F44704	1	UPI0004F44704	zinc finger CCCH domain-containing protein 6	1210	1-1149	2.3e-192	642.8	Aptenodytes forsteri (Emperor penguin)	9233	cellular organisms;Eukaryota;Opisthokonta;Metazoa;Eumetazoa;Bilateria;Deuterostomia;Chordata;Craniata;Vertebrata;Gnathostomata;Teleostomi;Euteleostomi;Sarcopterygii;Dipnotetrapodomorpha;Tetrapoda;Amniota;Sauropsida;Sauria;Archelosauria;Archosauria;Dinosauria;Saurischia;Theropoda;Coelurosauria;Aves;Neognathae;Sphenisciformes;Spheniscidae;Aptenodytes;Aptenodytes forsteri
UniRef100_A0A087RJN9	1	A0A087RJN9	Zinc finger CCCH domain-containing protein 6 (Fragment)	1178	2-1117	1.1e-180	604.1	Aptenodytes forsteri (Emperor penguin)	9233	cellular organisms;Eukaryota;Opisthokonta;Metazoa;Eumetazoa;Bilateria;Deuterostomia;Chordata;Craniata;Vertebrata;Gnathostomata;Teleostomi;Euteleostomi;Sarcopterygii;Dipnotetrapodomorpha;Tetrapoda;Amniota;Sauropsida;Sauria;Archelosauria;Archosauria;Dinosauria;Saurischia;Theropoda;Coelurosauria;Aves;Neognathae;Sphenisciformes;Spheniscidae;Aptenodytes;Aptenodytes forsteri
UniRef100_UPI00129DB3CD	1	UPI00129DB3CD	zinc finger CCCH domain-containing protein 6	1206	1-1148	5.5e-198	661.4	Phasianus colchicus (Common pheasant)	9054	cellular organisms;Eukaryota;Opisthokonta;Metazoa;Eumetazoa;Bilateria;Deuterostomia;Chordata;Craniata;Vertebrata;Gnathostomata;Teleostomi;Euteleostomi;Sarcopterygii;Dipnotetrapodomorpha;Tetrapoda;Amniota;Sauropsida;Sauria;Archelosauria;Archosauria;Dinosauria;Saurischia;Theropoda;Coelurosauria;Aves;Neognathae;Galloanserae;Galliformes;Phasianidae;Phasianinae;Phasianus;Phasianus colchicus
UniRef100_G1MVN5	2	G1MVN5	Zinc finger CCCH-type containing 6	1188	7-1130	4.4e-195	651.8	Meleagris gallopavo (Wild turkey)	9103	cellular organisms;Eukaryota;Opisthokonta;Metazoa;Eumetazoa;Bilateria;Deuterostomia;Chordata;Craniata;Vertebrata;Gnathostomata;Teleostomi;Euteleostomi;Sarcopterygii;Dipnotetrapodomorpha;Tetrapoda;Amniota;Sauropsida;Sauria;Archelosauria;Archosauria;Dinosauria;Saurischia;Theropoda;Coelurosauria;Aves;Neognathae;Galloanserae;Galliformes;Phasianidae;Meleagridinae;Meleagris;Meleagris gallopavo
UniRef100_UPI00077756B0	1	UPI00077756B0	zinc finger CCCH domain-containing protein 6	1206	1-1148	2.3e-197	659.3	Coturnix japonica (Japanese quail) (Coturnix coturnix japonica)	93934	cellular organisms;Eukaryota;Opisthokonta;Metazoa;Eumetazoa;Bilateria;Deuterostomia;Chordata;Craniata;Vertebrata;Gnathostomata;Teleostomi;Euteleostomi;Sarcopterygii;Dipnotetrapodomorpha;Tetrapoda;Amniota;Sauropsida;Sauria;Archelosauria;Archosauria;Dinosauria;Saurischia;Theropoda;Coelurosauria;Aves;Neognathae;Galloanserae;Galliformes;Phasianidae;Perdicinae;Coturnix;Coturnix japonica
UniRef100_E1C259	1	E1C259	Uncharacterized protein	1206	1-1147	8.8e-197	657.4	Gallus gallus (Chicken)	9031	cellular organisms;Eukaryota;Opisthokonta;Metazoa;Eumetazoa;Bilateria;Deuterostomia;Chordata;Craniata;Vertebrata;Gnathostomata;Teleostomi;Euteleostomi;Sarcopterygii;Dipnotetrapodomorpha;Tetrapoda;Amniota;Sauropsida;Sauria;Archelosauria;Archosauria;Dinosauria;Saurischia;Theropoda;Coelurosauria;Aves;Neognathae;Galloanserae;Galliformes;Phasianidae;Phasianinae;Gallus;Gallus gallus
UniRef100_UPI000B3DD351	1	UPI000B3DD351	zinc finger CCCH domain-containing protein 6 isoform X1	1206	1-1142	6.3e-196	654.6	Numida meleagris (Helmeted guineafowl) (Phasianus meleagris)	8996	cellular organisms;Eukaryota;Opisthokonta;Metazoa;Eumetazoa;Bilateria;Deuterostomia;Chordata;Craniata;Vertebrata;Gnathostomata;Teleostomi;Euteleostomi;Sarcopterygii;Dipnotetrapodomorpha;Tetrapoda;Amniota;Sauropsida;Sauria;Archelosauria;Archosauria;Dinosauria;Saurischia;Theropoda;Coelurosauria;Aves;Neognathae;Galloanserae;Galliformes;Numididae;Numida;Numida meleagris
UniRef100_UPI000B3DB7EC	1	UPI000B3DB7EC	zinc finger CCCH domain-containing protein 6 isoform X2	1198	24-1134	4.3e-194	648.5	Numida meleagris (Helmeted guineafowl) (Phasianus meleagris)	8996	cellular organisms;Eukaryota;Opisthokonta;Metazoa;Eumetazoa;Bilateria;Deuterostomia;Chordata;Craniata;Vertebrata;Gnathostomata;Teleostomi;Euteleostomi;Sarcopterygii;Dipnotetrapodomorpha;Tetrapoda;Amniota;Sauropsida;Sauria;Archelosauria;Archosauria;Dinosauria;Saurischia;Theropoda;Coelurosauria;Aves;Neognathae;Galloanserae;Galliformes;Numididae;Numida;Numida meleagris
UniRef100_UPI000670B4C5	1	UPI000670B4C5	LOW QUALITY PROTEIN: zinc finger CCCH domain-containing protein 6	1206	1-1148	3.7e-197	658.6	Anser cygnoides domesticus	381198	cellular organisms;Eukaryota;Opisthokonta;Metazoa;Eumetazoa;Bilateria;Deuterostomia;Chordata;Craniata;Vertebrata;Gnathostomata;Teleostomi;Euteleostomi;Sarcopterygii;Dipnotetrapodomorpha;Tetrapoda;Amniota;Sauropsida;Sauria;Archelosauria;Archosauria;Dinosauria;Saurischia;Theropoda;Coelurosauria;Aves;Neognathae;Galloanserae;Anseriformes;Anatidae;Anserinae;Anser;Anser cygnoides;Anser cygnoides domest…
UniRef100_UPI000351387A	1	UPI000351387A	zinc finger CCCH domain-containing protein 6 isoform X2	1211	1-1152	1.5e-190	636.7	Anas platyrhynchos (Mallard) (Anas boschas)	8839	cellular organisms;Eukaryota;Opisthokonta;Metazoa;Eumetazoa;Bilateria;Deuterostomia;Chordata;Craniata;Vertebrata;Gnathostomata;Teleostomi;Euteleostomi;Sarcopterygii;Dipnotetrapodomorpha;Tetrapoda;Amniota;Sauropsida;Sauria;Archelosauria;Archosauria;Dinosauria;Saurischia;Theropoda;Coelurosauria;Aves;Neognathae;Galloanserae;Anseriformes;Anatidae;Anatinae;Anas;Anas platyrhynchos
UniRef100_R0L853	1	R0L853	Zinc finger CCCH domain-containing protein 6 (Fragment)	1189	2-1130	2.9e-186	622.6	Anas platyrhynchos (Mallard) (Anas boschas)	8839	cellular organisms;Eukaryota;Opisthokonta;Metazoa;Eumetazoa;Bilateria;Deuterostomia;Chordata;Craniata;Vertebrata;Gnathostomata;Teleostomi;Euteleostomi;Sarcopterygii;Dipnotetrapodomorpha;Tetrapoda;Amniota;Sauropsida;Sauria;Archelosauria;Archosauria;Dinosauria;Saurischia;Theropoda;Coelurosauria;Aves;Neognathae;Galloanserae;Anseriformes;Anatidae;Anatinae;Anas;Anas platyrhynchos
UniRef100_U3J3P5	1	U3J3P5	Zinc finger CCCH-type containing 6	847	1-788	2.1e-114	384.8	Anas platyrhynchos platyrhynchos (Northern mallard)	8840	cellular organisms;Eukaryota;Opisthokonta;Metazoa;Eumetazoa;Bilateria;Deuterostomia;Chordata;Craniata;Vertebrata;Gnathostomata;Teleostomi;Euteleostomi;Sarcopterygii;Dipnotetrapodomorpha;Tetrapoda;Amniota;Sauropsida;Sauria;Archelosauria;Archosauria;Dinosauria;Saurischia;Theropoda;Coelurosauria;Aves;Neognathae;Galloanserae;Anseriformes;Anatidae;Anatinae;Anas;Anas platyrhynchos;Anas platyrhynchos pl…
UniRef100_UPI000523D425	1	UPI000523D425	LOW QUALITY PROTEIN: zinc finger CCCH domain-containing protein 6-like	1212	1-1147	6.1e-186	621.5	Chaetura pelagica (Chimney swift)	8897	cellular organisms;Eukaryota;Opisthokonta;Metazoa;Eumetazoa;Bilateria;Deuterostomia;Chordata;Craniata;Vertebrata;Gnathostomata;Teleostomi;Euteleostomi;Sarcopterygii;Dipnotetrapodomorpha;Tetrapoda;Amniota;Sauropsida;Sauria;Archelosauria;Archosauria;Dinosauria;Saurischia;Theropoda;Coelurosauria;Aves;Neognathae;Apodiformes;Apodidae;Chaetura;Chaetura pelagica
UniRef100_UPI000522DE85	1	UPI000522DE85	LOW QUALITY PROTEIN: zinc finger CCCH domain-containing protein 6-like	1207	1-1148	1e-197	660.5	Leptosomus discolor (Madagascar cuckoo roller) (Cuculus discolor)	188344	cellular organisms;Eukaryota;Opisthokonta;Metazoa;Eumetazoa;Bilateria;Deuterostomia;Chordata;Craniata;Vertebrata;Gnathostomata;Teleostomi;Euteleostomi;Sarcopterygii;Dipnotetrapodomorpha;Tetrapoda;Amniota;Sauropsida;Sauria;Archelosauria;Archosauria;Dinosauria;Saurischia;Theropoda;Coelurosauria;Aves;Neognathae;Coraciiformes;Leptosomidae;Leptosomus;Leptosomus discolor
UniRef100_A0A091PQD0	1	A0A091PQD0	Zinc finger CCCH domain-containing protein 6 (Fragment)	1173	2-1114	7.6e-194	647.7	Leptosomus discolor (Madagascar cuckoo roller) (Cuculus discolor)	188344	cellular organisms;Eukaryota;Opisthokonta;Metazoa;Eumetazoa;Bilateria;Deuterostomia;Chordata;Craniata;Vertebrata;Gnathostomata;Teleostomi;Euteleostomi;Sarcopterygii;Dipnotetrapodomorpha;Tetrapoda;Amniota;Sauropsida;Sauria;Archelosauria;Archosauria;Dinosauria;Saurischia;Theropoda;Coelurosauria;Aves;Neognathae;Coraciiformes;Leptosomidae;Leptosomus;Leptosomus discolor
UniRef100_UPI000E1B7892	1	UPI000E1B7892	zinc finger CCCH domain-containing protein 6	1206	1-1146	1.9e-197	659.5	Nothoprocta perdicaria (Chilean tinamou) (Crypturus perdicarius)	30464	cellular organisms;Eukaryota;Opisthokonta;Metazoa;Eumetazoa;Bilateria;Deuterostomia;Chordata;Craniata;Vertebrata;Gnathostomata;Teleostomi;Euteleostomi;Sarcopterygii;Dipnotetrapodomorpha;Tetrapoda;Amniota;Sauropsida;Sauria;Archelosauria;Archosauria;Dinosauria;Saurischia;Theropoda;Coelurosauria;Aves;Palaeognathae;Tinamiformes;Tinamidae;Nothoprocta;Nothoprocta perdicaria
UniRef100_UPI00052EE5E7	1	UPI00052EE5E7	zinc finger CCCH domain-containing protein 6	1208	1-1143	3e-195	652.3	Tinamus guttatus (White-throated tinamou)	94827	cellular organisms;Eukaryota;Opisthokonta;Metazoa;Eumetazoa;Bilateria;Deuterostomia;Chordata;Craniata;Vertebrata;Gnathostomata;Teleostomi;Euteleostomi;Sarcopterygii;Dipnotetrapodomorpha;Tetrapoda;Amniota;Sauropsida;Sauria;Archelosauria;Archosauria;Dinosauria;Saurischia;Theropoda;Coelurosauria;Aves;Palaeognathae;Tinamiformes;Tinamidae;Tinamus;Tinamus guttatus
UniRef100_A0A099ZT52	1	A0A099ZT52	Zinc finger CCCH domain-containing protein 6 (Fragment)	1182	2-1117	1.1e-190	637.2	Tinamus guttatus (White-throated tinamou)	94827	cellular organisms;Eukaryota;Opisthokonta;Metazoa;Eumetazoa;Bilateria;Deuterostomia;Chordata;Craniata;Vertebrata;Gnathostomata;Teleostomi;Euteleostomi;Sarcopterygii;Dipnotetrapodomorpha;Tetrapoda;Amniota;Sauropsida;Sauria;Archelosauria;Archosauria;Dinosauria;Saurischia;Theropoda;Coelurosauria;Aves;Palaeognathae;Tinamiformes;Tinamidae;Tinamus;Tinamus guttatus
UniRef100_UPI000E1ECA24	1	UPI000E1ECA24	zinc finger CCCH domain-containing protein 6 isoform X2	1201	1-1134	4.3e-194	648.5	Dromaius novaehollandiae (Emu)	8790	cellular organisms;Eukaryota;Opisthokonta;Metazoa;Eumetazoa;Bilateria;Deuterostomia;Chordata;Craniata;Vertebrata;Gnathostomata;Teleostomi;Euteleostomi;Sarcopterygii;Dipnotetrapodomorpha;Tetrapoda;Amniota;Sauropsida;Sauria;Archelosauria;Archosauria;Dinosauria;Saurischia;Theropoda;Coelurosauria;Aves;Palaeognathae;Casuariiformes;Dromaiidae;Dromaius;Dromaius novaehollandiae
UniRef100_UPI000E1E7E9A	1	UPI000E1E7E9A	zinc finger CCCH domain-containing protein 6 isoform X1	1256	1-1189	1.7e-187	626.7	Dromaius novaehollandiae (Emu)	8790	cellular organisms;Eukaryota;Opisthokonta;Metazoa;Eumetazoa;Bilateria;Deuterostomia;Chordata;Craniata;Vertebrata;Gnathostomata;Teleostomi;Euteleostomi;Sarcopterygii;Dipnotetrapodomorpha;Tetrapoda;Amniota;Sauropsida;Sauria;Archelosauria;Archosauria;Dinosauria;Saurischia;Theropoda;Coelurosauria;Aves;Palaeognathae;Casuariiformes;Dromaiidae;Dromaius;Dromaius novaehollandiae
UniRef100_UPI00051E536E	1	UPI00051E536E	zinc finger CCCH domain-containing protein 6-like isoform X2	1208	1-1139	3.5e-197	658.7	Struthio camelus australis	441894	cellular organisms;Eukaryota;Opisthokonta;Metazoa;Eumetazoa;Bilateria;Deuterostomia;Chordata;Craniata;Vertebrata;Gnathostomata;Teleostomi;Euteleostomi;Sarcopterygii;Dipnotetrapodomorpha;Tetrapoda;Amniota;Sauropsida;Sauria;Archelosauria;Archosauria;Dinosauria;Saurischia;Theropoda;Coelurosauria;Aves;Palaeognathae;Struthioniformes;Struthionidae;Struthio;Struthio camelus;Struthio camelus australis
UniRef100_UPI00051E348A	1	UPI00051E348A	zinc finger CCCH domain-containing protein 6-like isoform X1	1263	1-1194	3.7e-184	615.6	Struthio camelus australis	441894	cellular organisms;Eukaryota;Opisthokonta;Metazoa;Eumetazoa;Bilateria;Deuterostomia;Chordata;Craniata;Vertebrata;Gnathostomata;Teleostomi;Euteleostomi;Sarcopterygii;Dipnotetrapodomorpha;Tetrapoda;Amniota;Sauropsida;Sauria;Archelosauria;Archosauria;Dinosauria;Saurischia;Theropoda;Coelurosauria;Aves;Palaeognathae;Struthioniformes;Struthionidae;Struthio;Struthio camelus;Struthio camelus australis
UniRef100_A0A093HXI8	1	A0A093HXI8	Zinc finger CCCH domain-containing protein 6 (Fragment)	1186	2-1117	3.1e-192	642.3	Struthio camelus australis	441894	cellular organisms;Eukaryota;Opisthokonta;Metazoa;Eumetazoa;Bilateria;Deuterostomia;Chordata;Craniata;Vertebrata;Gnathostomata;Teleostomi;Euteleostomi;Sarcopterygii;Dipnotetrapodomorpha;Tetrapoda;Amniota;Sauropsida;Sauria;Archelosauria;Archosauria;Dinosauria;Saurischia;Theropoda;Coelurosauria;Aves;Palaeognathae;Struthioniformes;Struthionidae;Struthio;Struthio camelus;Struthio camelus australis
UniRef100_UPI000E1C8D57	1	UPI000E1C8D57	zinc finger CCCH domain-containing protein 6 isoform X3	1208	1-1139	9.2e-194	647.4	Apteryx rowi (Okarito brown kiwi)	308060	cellular organisms;Eukaryota;Opisthokonta;Metazoa;Eumetazoa;Bilateria;Deuterostomia;Chordata;Craniata;Vertebrata;Gnathostomata;Teleostomi;Euteleostomi;Sarcopterygii;Dipnotetrapodomorpha;Tetrapoda;Amniota;Sauropsida;Sauria;Archelosauria;Archosauria;Dinosauria;Saurischia;Theropoda;Coelurosauria;Aves;Palaeognathae;Apterygiformes;Apterygidae;Apteryx;Apteryx rowi
UniRef100_UPI000E1D72C5	1	UPI000E1D72C5	zinc finger CCCH domain-containing protein 6 isoform X2	1239	8-1170	3.8e-184	615.6	Apteryx rowi (Okarito brown kiwi)	308060	cellular organisms;Eukaryota;Opisthokonta;Metazoa;Eumetazoa;Bilateria;Deuterostomia;Chordata;Craniata;Vertebrata;Gnathostomata;Teleostomi;Euteleostomi;Sarcopterygii;Dipnotetrapodomorpha;Tetrapoda;Amniota;Sauropsida;Sauria;Archelosauria;Archosauria;Dinosauria;Saurischia;Theropoda;Coelurosauria;Aves;Palaeognathae;Apterygiformes;Apterygidae;Apteryx;Apteryx rowi
UniRef100_UPI0006B0BFB5	1	UPI0006B0BFB5	zinc finger CCCH domain-containing protein 6	1208	1-1146	4.8e-193	645.0	Apteryx australis mantelli	202946	cellular organisms;Eukaryota;Opisthokonta;Metazoa;Eumetazoa;Bilateria;Deuterostomia;Chordata;Craniata;Vertebrata;Gnathostomata;Teleostomi;Euteleostomi;Sarcopterygii;Dipnotetrapodomorpha;Tetrapoda;Amniota;Sauropsida;Sauria;Archelosauria;Archosauria;Dinosauria;Saurischia;Theropoda;Coelurosauria;Aves;Palaeognathae;Apterygiformes;Apterygidae;Apteryx;Apteryx australis;Apteryx australis mantelli
UniRef100_UPI000E1C6AC5	1	UPI000E1C6AC5	zinc finger CCCH domain-containing protein 6 isoform X1	1263	1-1194	4.4e-187	625.3	Apteryx rowi (Okarito brown kiwi)	308060	cellular organisms;Eukaryota;Opisthokonta;Metazoa;Eumetazoa;Bilateria;Deuterostomia;Chordata;Craniata;Vertebrata;Gnathostomata;Teleostomi;Euteleostomi;Sarcopterygii;Dipnotetrapodomorpha;Tetrapoda;Amniota;Sauropsida;Sauria;Archelosauria;Archosauria;Dinosauria;Saurischia;Theropoda;Coelurosauria;Aves;Palaeognathae;Apterygiformes;Apterygidae;Apteryx;Apteryx rowi
UniRef100_UPI0004628D07	1	UPI0004628D07	zinc finger CCCH domain-containing protein 6 isoform X1	1176	1-1089	2.7e-204	682.2	Anolis carolinensis (Green anole) (American chameleon)	28377	cellular organisms;Eukaryota;Opisthokonta;Metazoa;Eumetazoa;Bilateria;Deuterostomia;Chordata;Craniata;Vertebrata;Gnathostomata;Teleostomi;Euteleostomi;Sarcopterygii;Dipnotetrapodomorpha;Tetrapoda;Amniota;Sauropsida;Sauria;Lepidosauria;Squamata;Bifurcata;Unidentata;Episquamata;Toxicofera;Iguania;Dactyloidae;Anolis;Anolis carolinensis
UniRef100_H9GAL6	1	H9GAL6	Zinc finger CCCH-type containing 6	1168	12-1080	3.6e-204	681.8	Anolis carolinensis (Green anole) (American chameleon)	28377	cellular organisms;Eukaryota;Opisthokonta;Metazoa;Eumetazoa;Bilateria;Deuterostomia;Chordata;Craniata;Vertebrata;Gnathostomata;Teleostomi;Euteleostomi;Sarcopterygii;Dipnotetrapodomorpha;Tetrapoda;Amniota;Sauropsida;Sauria;Lepidosauria;Squamata;Bifurcata;Unidentata;Episquamata;Toxicofera;Iguania;Dactyloidae;Anolis;Anolis carolinensis
UniRef100_UPI000462632E	1	UPI000462632E	zinc finger CCCH domain-containing protein 6 isoform X2	1095	1-1004	2.2e-192	642.8	Anolis carolinensis (Green anole) (American chameleon)	28377	cellular organisms;Eukaryota;Opisthokonta;Metazoa;Eumetazoa;Bilateria;Deuterostomia;Chordata;Craniata;Vertebrata;Gnathostomata;Teleostomi;Euteleostomi;Sarcopterygii;Dipnotetrapodomorpha;Tetrapoda;Amniota;Sauropsida;Sauria;Lepidosauria;Squamata;Bifurcata;Unidentata;Episquamata;Toxicofera;Iguania;Dactyloidae;Anolis;Anolis carolinensis
UniRef100_UPI00074FEB30	1	UPI00074FEB30	zinc finger CCCH domain-containing protein 6	1182	1-1092	2.9e-198	662.3	Gekko japonicus (Schlegel's Japanese gecko)	146911	cellular organisms;Eukaryota;Opisthokonta;Metazoa;Eumetazoa;Bilateria;Deuterostomia;Chordata;Craniata;Vertebrata;Gnathostomata;Teleostomi;Euteleostomi;Sarcopterygii;Dipnotetrapodomorpha;Tetrapoda;Amniota;Sauropsida;Sauria;Lepidosauria;Squamata;Bifurcata;Gekkota;Gekkonidae;Gekkoninae;Gekko;Gekko japonicus
UniRef100_A0A402F5Y3	1	A0A402F5Y3	Uncharacterized protein	1131	1-1051	2.6e-171	573.1	Paroedura picta	143630	cellular organisms;Eukaryota;Opisthokonta;Metazoa;Eumetazoa;Bilateria;Deuterostomia;Chordata;Craniata;Vertebrata;Gnathostomata;Teleostomi;Euteleostomi;Sarcopterygii;Dipnotetrapodomorpha;Tetrapoda;Amniota;Sauropsida;Sauria;Lepidosauria;Squamata;Bifurcata;Gekkota;Gekkonidae;Gekkoninae;Paroedura;Paroedura picta
UniRef100_UPI0007758F67	1	UPI0007758F67	zinc finger CCCH domain-containing protein 6	1182	1-1120	5.2e-192	641.6	Protobothrops mucrosquamatus (Taiwan habu) (Trimeresurus mucrosquamatus)	103944	cellular organisms;Eukaryota;Opisthokonta;Metazoa;Eumetazoa;Bilateria;Deuterostomia;Chordata;Craniata;Vertebrata;Gnathostomata;Teleostomi;Euteleostomi;Sarcopterygii;Dipnotetrapodomorpha;Tetrapoda;Amniota;Sauropsida;Sauria;Lepidosauria;Squamata;Bifurcata;Unidentata;Episquamata;Toxicofera;Serpentes;Colubroidea;Viperidae;Crotalinae;Protobothrops;Protobothrops mucrosquamatus
UniRef100_UPI000E785955	1	UPI000E785955	zinc finger CCCH domain-containing protein 6 isoform X2	1182	1-1117	1.7e-186	623.4	Notechis scutatus (mainland tiger snake)	8663	cellular organisms;Eukaryota;Opisthokonta;Metazoa;Eumetazoa;Bilateria;Deuterostomia;Chordata;Craniata;Vertebrata;Gnathostomata;Teleostomi;Euteleostomi;Sarcopterygii;Dipnotetrapodomorpha;Tetrapoda;Amniota;Sauropsida;Sauria;Lepidosauria;Squamata;Bifurcata;Unidentata;Episquamata;Toxicofera;Serpentes;Colubroidea;Elapidae;Acanthophiinae;Notechis;Notechis scutatus
UniRef100_UPI000E78100B	1	UPI000E78100B	zinc finger CCCH domain-containing protein 6 isoform X1	1183	1-1118	2.1e-186	623.0	Notechis scutatus (mainland tiger snake)	8663	cellular organisms;Eukaryota;Opisthokonta;Metazoa;Eumetazoa;Bilateria;Deuterostomia;Chordata;Craniata;Vertebrata;Gnathostomata;Teleostomi;Euteleostomi;Sarcopterygii;Dipnotetrapodomorpha;Tetrapoda;Amniota;Sauropsida;Sauria;Lepidosauria;Squamata;Bifurcata;Unidentata;Episquamata;Toxicofera;Serpentes;Colubroidea;Elapidae;Acanthophiinae;Notechis;Notechis scutatus
UniRef100_UPI000EA8CFA8	1	UPI000EA8CFA8	zinc finger CCCH domain-containing protein 6 isoform X2	1182	1-1117	4.6e-186	621.9	Pseudonaja textilis (Eastern brown snake)	8673	cellular organisms;Eukaryota;Opisthokonta;Metazoa;Eumetazoa;Bilateria;Deuterostomia;Chordata;Craniata;Vertebrata;Gnathostomata;Teleostomi;Euteleostomi;Sarcopterygii;Dipnotetrapodomorpha;Tetrapoda;Amniota;Sauropsida;Sauria;Lepidosauria;Squamata;Bifurcata;Unidentata;Episquamata;Toxicofera;Serpentes;Colubroidea;Elapidae;Acanthophiinae;Pseudonaja;Pseudonaja textilis
UniRef100_UPI000EAA5609	2	UPI000EAA5609	zinc finger CCCH domain-containing protein 6 isoform X1	1183	1-1118	5.8e-186	621.6	Pseudonaja textilis (Eastern brown snake)	8673	cellular organisms;Eukaryota;Opisthokonta;Metazoa;Eumetazoa;Bilateria;Deuterostomia;Chordata;Craniata;Vertebrata;Gnathostomata;Teleostomi;Euteleostomi;Sarcopterygii;Dipnotetrapodomorpha;Tetrapoda;Amniota;Sauropsida;Sauria;Lepidosauria;Squamata;Bifurcata;Unidentata;Episquamata;Toxicofera;Serpentes;Colubroidea;Elapidae;Acanthophiinae;Pseudonaja;Pseudonaja textilis
UniRef100_V8P6Z6	1	V8P6Z6	Zinc finger CCCH domain-containing protein 6 (Fragment)	1140	1-1080	9.3e-159	531.6	Ophiophagus hannah (King cobra) (Naja hannah)	8665	cellular organisms;Eukaryota;Opisthokonta;Metazoa;Eumetazoa;Bilateria;Deuterostomia;Chordata;Craniata;Vertebrata;Gnathostomata;Teleostomi;Euteleostomi;Sarcopterygii;Dipnotetrapodomorpha;Tetrapoda;Amniota;Sauropsida;Sauria;Lepidosauria;Squamata;Bifurcata;Unidentata;Episquamata;Toxicofera;Serpentes;Colubroidea;Elapidae;Elapinae;Ophiophagus;Ophiophagus hannah
UniRef100_UPI0006B17F55	1	UPI0006B17F55	zinc finger CCCH domain-containing protein 6	1182	1-1122	2.3e-186	622.9	Thamnophis sirtalis	35019	cellular organisms;Eukaryota;Opisthokonta;Metazoa;Eumetazoa;Bilateria;Deuterostomia;Chordata;Craniata;Vertebrata;Gnathostomata;Teleostomi;Euteleostomi;Sarcopterygii;Dipnotetrapodomorpha;Tetrapoda;Amniota;Sauropsida;Sauria;Lepidosauria;Squamata;Bifurcata;Unidentata;Episquamata;Toxicofera;Serpentes;Colubroidea;Colubridae;Natricinae;Thamnophis;Thamnophis sirtalis
UniRef100_UPI000441A16D	1	UPI000441A16D	zinc finger CCCH domain-containing protein 6 isoform X4	1183	1-1125	2e-186	623.1	Python bivittatus (Burmese python) (Python molurus bivittatus)	176946	cellular organisms;Eukaryota;Opisthokonta;Metazoa;Eumetazoa;Bilateria;Deuterostomia;Chordata;Craniata;Vertebrata;Gnathostomata;Teleostomi;Euteleostomi;Sarcopterygii;Dipnotetrapodomorpha;Tetrapoda;Amniota;Sauropsida;Sauria;Lepidosauria;Squamata;Bifurcata;Unidentata;Episquamata;Toxicofera;Serpentes;Henophidia;Pythonidae;Python;Python bivittatus
UniRef100_UPI000D6A5FDE	1	UPI000D6A5FDE	zinc finger CCCH domain-containing protein 6 isoform X1	1202	24-1144	2.5e-184	616.2	Python bivittatus (Burmese python) (Python molurus bivittatus)	176946	cellular organisms;Eukaryota;Opisthokonta;Metazoa;Eumetazoa;Bilateria;Deuterostomia;Chordata;Craniata;Vertebrata;Gnathostomata;Teleostomi;Euteleostomi;Sarcopterygii;Dipnotetrapodomorpha;Tetrapoda;Amniota;Sauropsida;Sauria;Lepidosauria;Squamata;Bifurcata;Unidentata;Episquamata;Toxicofera;Serpentes;Henophidia;Pythonidae;Python;Python bivittatus
UniRef100_UPI000D6A2521	1	UPI000D6A2521	zinc finger CCCH domain-containing protein 6 isoform X2	1201	24-1143	4.7e-184	615.3	Python bivittatus (Burmese python) (Python molurus bivittatus)	176946	cellular organisms;Eukaryota;Opisthokonta;Metazoa;Eumetazoa;Bilateria;Deuterostomia;Chordata;Craniata;Vertebrata;Gnathostomata;Teleostomi;Euteleostomi;Sarcopterygii;Dipnotetrapodomorpha;Tetrapoda;Amniota;Sauropsida;Sauria;Lepidosauria;Squamata;Bifurcata;Unidentata;Episquamata;Toxicofera;Serpentes;Henophidia;Pythonidae;Python;Python bivittatus
UniRef100_UPI000D6A1E8F	1	UPI000D6A1E8F	zinc finger CCCH domain-containing protein 6 isoform X6	1174	15-1116	6.5e-184	614.8	Python bivittatus (Burmese python) (Python molurus bivittatus)	176946	cellular organisms;Eukaryota;Opisthokonta;Metazoa;Eumetazoa;Bilateria;Deuterostomia;Chordata;Craniata;Vertebrata;Gnathostomata;Teleostomi;Euteleostomi;Sarcopterygii;Dipnotetrapodomorpha;Tetrapoda;Amniota;Sauropsida;Sauria;Lepidosauria;Squamata;Bifurcata;Unidentata;Episquamata;Toxicofera;Serpentes;Henophidia;Pythonidae;Python;Python bivittatus
UniRef100_UPI000441EFC4	1	UPI000441EFC4	zinc finger CCCH domain-containing protein 6 isoform X5	1182	1-1124	3.6e-186	622.3	Python bivittatus (Burmese python) (Python molurus bivittatus)	176946	cellular organisms;Eukaryota;Opisthokonta;Metazoa;Eumetazoa;Bilateria;Deuterostomia;Chordata;Craniata;Vertebrata;Gnathostomata;Teleostomi;Euteleostomi;Sarcopterygii;Dipnotetrapodomorpha;Tetrapoda;Amniota;Sauropsida;Sauria;Lepidosauria;Squamata;Bifurcata;Unidentata;Episquamata;Toxicofera;Serpentes;Henophidia;Pythonidae;Python;Python bivittatus
UniRef100_UPI000D6A2142	1	UPI000D6A2142	zinc finger CCCH domain-containing protein 6 isoform X3	1184	1-1126	2.5e-186	622.8	Python bivittatus (Burmese python) (Python molurus bivittatus)	176946	cellular organisms;Eukaryota;Opisthokonta;Metazoa;Eumetazoa;Bilateria;Deuterostomia;Chordata;Craniata;Vertebrata;Gnathostomata;Teleostomi;Euteleostomi;Sarcopterygii;Dipnotetrapodomorpha;Tetrapoda;Amniota;Sauropsida;Sauria;Lepidosauria;Squamata;Bifurcata;Unidentata;Episquamata;Toxicofera;Serpentes;Henophidia;Pythonidae;Python;Python bivittatus
UniRef100_UPI00109FB04A	1	UPI00109FB04A	zinc finger CCCH domain-containing protein 6 isoform X1	1177	1-1098	3.5e-191	638.9	Podarcis muralis (Wall lizard) (Lacerta muralis)	64176	cellular organisms;Eukaryota;Opisthokonta;Metazoa;Eumetazoa;Bilateria;Deuterostomia;Chordata;Craniata;Vertebrata;Gnathostomata;Teleostomi;Euteleostomi;Sarcopterygii;Dipnotetrapodomorpha;Tetrapoda;Amniota;Sauropsida;Sauria;Lepidosauria;Squamata;Bifurcata;Unidentata;Episquamata;Laterata;Lacertibaenia;Lacertidae;Lacertinae;Podarcis;Podarcis muralis
UniRef100_UPI00109FDE2F	1	UPI00109FDE2F	zinc finger CCCH domain-containing protein 6 isoform X2	1158	13-1079	3.4e-188	629.0	Podarcis muralis (Wall lizard) (Lacerta muralis)	64176	cellular organisms;Eukaryota;Opisthokonta;Metazoa;Eumetazoa;Bilateria;Deuterostomia;Chordata;Craniata;Vertebrata;Gnathostomata;Teleostomi;Euteleostomi;Sarcopterygii;Dipnotetrapodomorpha;Tetrapoda;Amniota;Sauropsida;Sauria;Lepidosauria;Squamata;Bifurcata;Unidentata;Episquamata;Laterata;Lacertibaenia;Lacertidae;Lacertinae;Podarcis;Podarcis muralis
UniRef100_UPI0009E1EEE1	1	UPI0009E1EEE1	zinc finger CCCH domain-containing protein 6	1190	1-1128	4.5e-192	641.8	Pogona vitticeps (central bearded dragon)	103695	cellular organisms;Eukaryota;Opisthokonta;Metazoa;Eumetazoa;Bilateria;Deuterostomia;Chordata;Craniata;Vertebrata;Gnathostomata;Teleostomi;Euteleostomi;Sarcopterygii;Dipnotetrapodomorpha;Tetrapoda;Amniota;Sauropsida;Sauria;Lepidosauria;Squamata;Bifurcata;Unidentata;Episquamata;Toxicofera;Iguania;Acrodonta;Agamidae;Amphibolurinae;Pogona;Pogona vitticeps
UniRef100_UPI001128AAD2	1	UPI001128AAD2	zinc finger CCCH domain-containing protein 6 isoform X2	1226	1-1131	6e-194	648.0	Rhinatrema bivittatum (Two-lined caecilian) (Coecilia bivittatum)	194408	cellular organisms;Eukaryota;Opisthokonta;Metazoa;Eumetazoa;Bilateria;Deuterostomia;Chordata;Craniata;Vertebrata;Gnathostomata;Teleostomi;Euteleostomi;Sarcopterygii;Dipnotetrapodomorpha;Tetrapoda;Amphibia;Gymnophiona;Rhinatrematidae;Rhinatrema;Rhinatrema bivittatum
UniRef100_UPI001129E72A	2	UPI001129E72A	zinc finger CCCH domain-containing protein 6 isoform X1	1061	7-966	2.1e-161	540.3	Rhinatrema bivittatum (Two-lined caecilian) (Coecilia bivittatum)	194408	cellular organisms;Eukaryota;Opisthokonta;Metazoa;Eumetazoa;Bilateria;Deuterostomia;Chordata;Craniata;Vertebrata;Gnathostomata;Teleostomi;Euteleostomi;Sarcopterygii;Dipnotetrapodomorpha;Tetrapoda;Amphibia;Gymnophiona;Rhinatrematidae;Rhinatrema;Rhinatrema bivittatum
UniRef100_UPI00118501A0	2	UPI00118501A0	zinc finger CCCH domain-containing protein 6 isoform X1	1206	1-1102	6.8e-174	581.7	Microcaecilia unicolor	1415580	cellular organisms;Eukaryota;Opisthokonta;Metazoa;Eumetazoa;Bilateria;Deuterostomia;Chordata;Craniata;Vertebrata;Gnathostomata;Teleostomi;Euteleostomi;Sarcopterygii;Dipnotetrapodomorpha;Tetrapoda;Amphibia;Gymnophiona;Siphonopidae;Microcaecilia;Microcaecilia unicolor
UniRef100_UPI00118532B9	1	UPI00118532B9	zinc finger CCCH domain-containing protein 6 isoform X3	1005	16-913	3.4e-133	447.0	Microcaecilia unicolor	1415580	cellular organisms;Eukaryota;Opisthokonta;Metazoa;Eumetazoa;Bilateria;Deuterostomia;Chordata;Craniata;Vertebrata;Gnathostomata;Teleostomi;Euteleostomi;Sarcopterygii;Dipnotetrapodomorpha;Tetrapoda;Amphibia;Gymnophiona;Siphonopidae;Microcaecilia;Microcaecilia unicolor
UniRef100_A4IHK0	1	A4IHK0	Zc3h6 protein	1005	4-930	1.8e-168	563.7	Xenopus tropicalis (Western clawed frog) (Silurana tropicalis)	8364	cellular organisms;Eukaryota;Opisthokonta;Metazoa;Eumetazoa;Bilateria;Deuterostomia;Chordata;Craniata;Vertebrata;Gnathostomata;Teleostomi;Euteleostomi;Sarcopterygii;Dipnotetrapodomorpha;Tetrapoda;Amphibia;Batrachia;Anura;Pipoidea;Pipidae;Xenopodinae;Xenopus;Silurana;Xenopus tropicalis
UniRef100_F6UZQ4	1	F6UZQ4	Uncharacterized protein	1023	1-948	7.1e-167	558.4	Xenopus tropicalis (Western clawed frog) (Silurana tropicalis)	8364	cellular organisms;Eukaryota;Opisthokonta;Metazoa;Eumetazoa;Bilateria;Deuterostomia;Chordata;Craniata;Vertebrata;Gnathostomata;Teleostomi;Euteleostomi;Sarcopterygii;Dipnotetrapodomorpha;Tetrapoda;Amphibia;Batrachia;Anura;Pipoidea;Pipidae;Xenopodinae;Xenopus;Silurana;Xenopus tropicalis
UniRef100_L7N3K4	1	L7N3K4	Uncharacterized protein	996	5-921	1.3e-158	531.1	Xenopus tropicalis (Western clawed frog) (Silurana tropicalis)	8364	cellular organisms;Eukaryota;Opisthokonta;Metazoa;Eumetazoa;Bilateria;Deuterostomia;Chordata;Craniata;Vertebrata;Gnathostomata;Teleostomi;Euteleostomi;Sarcopterygii;Dipnotetrapodomorpha;Tetrapoda;Amphibia;Batrachia;Anura;Pipoidea;Pipidae;Xenopodinae;Xenopus;Silurana;Xenopus tropicalis
UniRef100_A0A1L8G1V5	1	A0A1L8G1V5	Uncharacterized protein	1040	1-972	8.6e-156	521.8	Xenopus laevis (African clawed frog)	8355	cellular organisms;Eukaryota;Opisthokonta;Metazoa;Eumetazoa;Bilateria;Deuterostomia;Chordata;Craniata;Vertebrata;Gnathostomata;Teleostomi;Euteleostomi;Sarcopterygii;Dipnotetrapodomorpha;Tetrapoda;Amphibia;Batrachia;Anura;Pipoidea;Pipidae;Xenopodinae;Xenopus;Xenopus;Xenopus laevis
UniRef100_UPI00084D761A	1	UPI00084D761A	zinc finger CCCH domain-containing protein 6-like	1021	1-935	3.5e-152	509.8	Xenopus laevis (African clawed frog)	8355	cellular organisms;Eukaryota;Opisthokonta;Metazoa;Eumetazoa;Bilateria;Deuterostomia;Chordata;Craniata;Vertebrata;Gnathostomata;Teleostomi;Euteleostomi;Sarcopterygii;Dipnotetrapodomorpha;Tetrapoda;Amphibia;Batrachia;Anura;Pipoidea;Pipidae;Xenopodinae;Xenopus;Xenopus;Xenopus laevis
UniRef100_A0A1L8G7R9	1	A0A1L8G7R9	Uncharacterized protein	1038	1-955	1.6e-142	477.9	Xenopus laevis (African clawed frog)	8355	cellular organisms;Eukaryota;Opisthokonta;Metazoa;Eumetazoa;Bilateria;Deuterostomia;Chordata;Craniata;Vertebrata;Gnathostomata;Teleostomi;Euteleostomi;Sarcopterygii;Dipnotetrapodomorpha;Tetrapoda;Amphibia;Batrachia;Anura;Pipoidea;Pipidae;Xenopodinae;Xenopus;Xenopus;Xenopus laevis
UniRef100_UPI000854E509	1	UPI000854E509	zinc finger CCCH domain-containing protein 6	1040	1-954	4.7e-144	482.9	Nanorana parkeri	125878	cellular organisms;Eukaryota;Opisthokonta;Metazoa;Eumetazoa;Bilateria;Deuterostomia;Chordata;Craniata;Vertebrata;Gnathostomata;Teleostomi;Euteleostomi;Sarcopterygii;Dipnotetrapodomorpha;Tetrapoda;Amphibia;Batrachia;Anura;Neobatrachia;Ranoidea;Dicroglossidae;Dicroglossinae;Nanorana;Nanorana parkeri
UniRef100_UPI0006D91D27	1	UPI0006D91D27	zinc finger CCCH domain-containing protein 6	1240	2-1160	9.7e-161	538.1	Latimeria chalumnae (Coelacanth)	7897	cellular organisms;Eukaryota;Opisthokonta;Metazoa;Eumetazoa;Bilateria;Deuterostomia;Chordata;Craniata;Vertebrata;Gnathostomata;Teleostomi;Euteleostomi;Sarcopterygii;Coelacanthimorpha;Coelacanthiformes;Coelacanthidae;Latimeria;Latimeria chalumnae
UniRef100_H3AVH9	1	H3AVH9	Zinc finger CCCH-type containing 6	1217	5-1137	1.5e-158	530.9	Latimeria chalumnae (Coelacanth)	7897	cellular organisms;Eukaryota;Opisthokonta;Metazoa;Eumetazoa;Bilateria;Deuterostomia;Chordata;Craniata;Vertebrata;Gnathostomata;Teleostomi;Euteleostomi;Sarcopterygii;Coelacanthimorpha;Coelacanthiformes;Coelacanthidae;Latimeria;Latimeria chalumnae
UniRef100_UPI000F09DDAD	1	UPI000F09DDAD	zinc finger CCCH domain-containing protein 6	1180	1-1078	3.2e-169	566.2	Electrophorus electricus (Electric eel) (Gymnotus electricus)	8005	cellular organisms;Eukaryota;Opisthokonta;Metazoa;Eumetazoa;Bilateria;Deuterostomia;Chordata;Craniata;Vertebrata;Gnathostomata;Teleostomi;Euteleostomi;Actinopterygii;Actinopteri;Neopterygii;Teleostei;Osteoglossocephalai;Clupeocephala;Otomorpha;Ostariophysi;Otophysi;Characiphysae;Gymnotiformes;Gymnotoidei;Gymnotidae;Electrophorus;Electrophorus electricus
UniRef100_A0A4W4HBW9	1	A0A4W4HBW9	Uncharacterized protein	1177	1-1075	1.9e-164	550.4	Electrophorus electricus (Electric eel) (Gymnotus electricus)	8005	cellular organisms;Eukaryota;Opisthokonta;Metazoa;Eumetazoa;Bilateria;Deuterostomia;Chordata;Craniata;Vertebrata;Gnathostomata;Teleostomi;Euteleostomi;Actinopterygii;Actinopteri;Neopterygii;Teleostei;Osteoglossocephalai;Clupeocephala;Otomorpha;Ostariophysi;Otophysi;Characiphysae;Gymnotiformes;Gymnotoidei;Gymnotidae;Electrophorus;Electrophorus electricus
UniRef100_A0A3B4DMI9	1	A0A3B4DMI9	Zinc finger CCCH-type containing 6	1157	1-1060	1.6e-168	563.9	Pygocentrus nattereri (Red-bellied piranha)	42514	cellular organisms;Eukaryota;Opisthokonta;Metazoa;Eumetazoa;Bilateria;Deuterostomia;Chordata;Craniata;Vertebrata;Gnathostomata;Teleostomi;Euteleostomi;Actinopterygii;Actinopteri;Neopterygii;Teleostei;Osteoglossocephalai;Clupeocephala;Otomorpha;Ostariophysi;Otophysi;Characiphysae;Characiformes;Characoidei;Serrasalmidae;Pygocentrus;Pygocentrus nattereri
UniRef100_UPI000BBD53AC	1	UPI000BBD53AC	LOW QUALITY PROTEIN: zinc finger CCCH domain-containing protein 6	1169	1-1011	2.8e-154	516.7	Astyanax mexicanus (Blind cave fish) (Astyanax fasciatus mexicanus)	7994	cellular organisms;Eukaryota;Opisthokonta;Metazoa;Eumetazoa;Bilateria;Deuterostomia;Chordata;Craniata;Vertebrata;Gnathostomata;Teleostomi;Euteleostomi;Actinopterygii;Actinopteri;Neopterygii;Teleostei;Osteoglossocephalai;Clupeocephala;Otomorpha;Ostariophysi;Otophysi;Characiphysae;Characiformes;Characoidei;Characidae;Stethaprioninae;Astyanax;Astyanax mexicanus
UniRef100_W5L2E4	1	W5L2E4	Zinc finger CCCH-type containing 6	1156	1-999	3.4e-149	499.9	Astyanax mexicanus (Blind cave fish) (Astyanax fasciatus mexicanus)	7994	cellular organisms;Eukaryota;Opisthokonta;Metazoa;Eumetazoa;Bilateria;Deuterostomia;Chordata;Craniata;Vertebrata;Gnathostomata;Teleostomi;Euteleostomi;Actinopterygii;Actinopteri;Neopterygii;Teleostei;Osteoglossocephalai;Clupeocephala;Otomorpha;Ostariophysi;Otophysi;Characiphysae;Characiformes;Characoidei;Characidae;Stethaprioninae;Astyanax;Astyanax mexicanus
UniRef100_UPI000F00C413	1	UPI000F00C413	zinc finger CCCH domain-containing protein 6 isoform X2	1157	1-1027	2.1e-162	543.6	Pangasianodon hypophthalmus (Striped catfish) (Helicophagus hypophthalmus)	310915	cellular organisms;Eukaryota;Opisthokonta;Metazoa;Eumetazoa;Bilateria;Deuterostomia;Chordata;Craniata;Vertebrata;Gnathostomata;Teleostomi;Euteleostomi;Actinopterygii;Actinopteri;Neopterygii;Teleostei;Osteoglossocephalai;Clupeocephala;Otomorpha;Ostariophysi;Otophysi;Characiphysae;Siluriformes;Siluroidei;Pangasiidae;Pangasianodon;Pangasianodon hypophthalmus
UniRef100_UPI000EFE6851	1	UPI000EFE6851	zinc finger CCCH domain-containing protein 6 isoform X1	1158	1-1028	2.6e-161	540.0	Pangasianodon hypophthalmus (Striped catfish) (Helicophagus hypophthalmus)	310915	cellular organisms;Eukaryota;Opisthokonta;Metazoa;Eumetazoa;Bilateria;Deuterostomia;Chordata;Craniata;Vertebrata;Gnathostomata;Teleostomi;Euteleostomi;Actinopterygii;Actinopteri;Neopterygii;Teleostei;Osteoglossocephalai;Clupeocephala;Otomorpha;Ostariophysi;Otophysi;Characiphysae;Siluriformes;Siluroidei;Pangasiidae;Pangasianodon;Pangasianodon hypophthalmus
UniRef100_W5UH00	1	W5UH00	Zinc finger CCCH domain-containing protein 6	1148	1-1009	5.2e-153	512.6	Ictalurus punctatus (Channel catfish) (Silurus punctatus)	7998	cellular organisms;Eukaryota;Opisthokonta;Metazoa;Eumetazoa;Bilateria;Deuterostomia;Chordata;Craniata;Vertebrata;Gnathostomata;Teleostomi;Euteleostomi;Actinopterygii;Actinopteri;Neopterygii;Teleostei;Osteoglossocephalai;Clupeocephala;Otomorpha;Ostariophysi;Otophysi;Characiphysae;Siluriformes;Siluroidei;Ictaluridae;Ictalurus;Ictalurus punctatus
UniRef100_A0A2D0QPG3	1	A0A2D0QPG3	zinc finger CCCH domain-containing protein 6 isoform X2	1147	1-1008	1.2e-152	511.4	Ictalurus punctatus (Channel catfish) (Silurus punctatus)	7998	cellular organisms;Eukaryota;Opisthokonta;Metazoa;Eumetazoa;Bilateria;Deuterostomia;Chordata;Craniata;Vertebrata;Gnathostomata;Teleostomi;Euteleostomi;Actinopterygii;Actinopteri;Neopterygii;Teleostei;Osteoglossocephalai;Clupeocephala;Otomorpha;Ostariophysi;Otophysi;Characiphysae;Siluriformes;Siluroidei;Ictaluridae;Ictalurus;Ictalurus punctatus
UniRef100_UPI000F4ED687	1	UPI000F4ED687	zinc finger CCCH domain-containing protein 6	1138	1-1007	6.1e-150	502.4	Tachysurus fulvidraco (Yellow catfish) (Pimelodus fulvidraco)	1234273	cellular organisms;Eukaryota;Opisthokonta;Metazoa;Eumetazoa;Bilateria;Deuterostomia;Chordata;Craniata;Vertebrata;Gnathostomata;Teleostomi;Euteleostomi;Actinopterygii;Actinopteri;Neopterygii;Teleostei;Osteoglossocephalai;Clupeocephala;Otomorpha;Ostariophysi;Otophysi;Characiphysae;Siluriformes;Siluroidei;Bagridae;Tachysurus;Tachysurus fulvidraco
UniRef100_A0A556VC41	1	A0A556VC41	Zinc finger CCCH domain-containing protein 6	1164	1-1075	2e-137	461.0	Bagarius yarrelli (Goonch) (Bagrus yarrelli)	175774	cellular organisms;Eukaryota;Opisthokonta;Metazoa;Eumetazoa;Bilateria;Deuterostomia;Chordata;Craniata;Vertebrata;Gnathostomata;Teleostomi;Euteleostomi;Actinopterygii;Actinopteri;Neopterygii;Teleostei;Osteoglossocephalai;Clupeocephala;Otomorpha;Ostariophysi;Otophysi;Characiphysae;Siluriformes;Siluroidei;Sisoridae;Sisorinae;Bagarius;Bagarius yarrelli
UniRef100_UPI0003837A7F	1	UPI0003837A7F	zinc finger CCCH domain-containing protein 6	1134	1-1035	5.6e-158	529.0	Danio rerio (Zebrafish) (Brachydanio rerio)	7955	cellular organisms;Eukaryota;Opisthokonta;Metazoa;Eumetazoa;Bilateria;Deuterostomia;Chordata;Craniata;Vertebrata;Gnathostomata;Teleostomi;Euteleostomi;Actinopterygii;Actinopteri;Neopterygii;Teleostei;Osteoglossocephalai;Clupeocephala;Otomorpha;Ostariophysi;Otophysi;Cypriniphysae;Cypriniformes;Cyprinoidei;Cyprinidae;Danio;Danio rerio
UniRef100_F1Q6H4	1	F1Q6H4	Zinc finger CCCH-type-containing 6	1039	157-940	5.7e-126	423.1	Danio rerio (Zebrafish) (Brachydanio rerio)	7955	cellular organisms;Eukaryota;Opisthokonta;Metazoa;Eumetazoa;Bilateria;Deuterostomia;Chordata;Craniata;Vertebrata;Gnathostomata;Teleostomi;Euteleostomi;Actinopterygii;Actinopteri;Neopterygii;Teleostei;Osteoglossocephalai;Clupeocephala;Otomorpha;Ostariophysi;Otophysi;Cypriniphysae;Cypriniformes;Cyprinoidei;Cyprinidae;Danio;Danio rerio
UniRef100_A0A553R601	1	A0A553R601	Uncharacterized protein	1092	1-1005	1.2e-136	458.5	Danionella translucida	623744	cellular organisms;Eukaryota;Opisthokonta;Metazoa;Eumetazoa;Bilateria;Deuterostomia;Chordata;Craniata;Vertebrata;Gnathostomata;Teleostomi;Euteleostomi;Actinopterygii;Actinopteri;Neopterygii;Teleostei;Osteoglossocephalai;Clupeocephala;Otomorpha;Ostariophysi;Otophysi;Cypriniphysae;Cypriniformes;Cyprinoidei;Cyprinidae;Danionella;Danionella translucida
UniRef100_UPI000E40E6E4	2	UPI000E40E6E4	zinc finger CCCH domain-containing protein 6-like isoform X1	1145	1-1056	2.1e-154	517.2	Carassius auratus (Goldfish)	7957	cellular organisms;Eukaryota;Opisthokonta;Metazoa;Eumetazoa;Bilateria;Deuterostomia;Chordata;Craniata;Vertebrata;Gnathostomata;Teleostomi;Euteleostomi;Actinopterygii;Actinopteri;Neopterygii;Teleostei;Osteoglossocephalai;Clupeocephala;Otomorpha;Ostariophysi;Otophysi;Cypriniphysae;Cypriniformes;Cyprinoidei;Cyprinidae;Carassius;Carassius auratus
UniRef100_UPI000E417244	1	UPI000E417244	zinc finger CCCH domain-containing protein 6-like isoform X3	1132	1-1043	2.6e-154	516.9	Carassius auratus (Goldfish)	7957	cellular organisms;Eukaryota;Opisthokonta;Metazoa;Eumetazoa;Bilateria;Deuterostomia;Chordata;Craniata;Vertebrata;Gnathostomata;Teleostomi;Euteleostomi;Actinopterygii;Actinopteri;Neopterygii;Teleostei;Osteoglossocephalai;Clupeocephala;Otomorpha;Ostariophysi;Otophysi;Cypriniphysae;Cypriniformes;Cyprinoidei;Cyprinidae;Carassius;Carassius auratus
UniRef100_UPI000E41A82D	1	UPI000E41A82D	zinc finger CCCH domain-containing protein 6-like isoform X2	1144	1-1055	2.3e-154	517.0	Carassius auratus (Goldfish)	7957	cellular organisms;Eukaryota;Opisthokonta;Metazoa;Eumetazoa;Bilateria;Deuterostomia;Chordata;Craniata;Vertebrata;Gnathostomata;Teleostomi;Euteleostomi;Actinopterygii;Actinopteri;Neopterygii;Teleostei;Osteoglossocephalai;Clupeocephala;Otomorpha;Ostariophysi;Otophysi;Cypriniphysae;Cypriniformes;Cyprinoidei;Cyprinidae;Carassius;Carassius auratus
UniRef100_UPI0007B9DB88	1	UPI0007B9DB88	zinc finger CCCH domain-containing protein 6-like isoform X1	1145	1-1049	2.3e-153	513.8	Sinocyclocheilus rhinocerous	307959	cellular organisms;Eukaryota;Opisthokonta;Metazoa;Eumetazoa;Bilateria;Deuterostomia;Chordata;Craniata;Vertebrata;Gnathostomata;Teleostomi;Euteleostomi;Actinopterygii;Actinopteri;Neopterygii;Teleostei;Osteoglossocephalai;Clupeocephala;Otomorpha;Ostariophysi;Otophysi;Cypriniphysae;Cypriniformes;Cyprinoidei;Cyprinidae;Sinocyclocheilus;Sinocyclocheilus rhinocerous
UniRef100_UPI0007B9A9EA	1	UPI0007B9A9EA	zinc finger CCCH domain-containing protein 6-like isoform X3	1140	1-1044	1.3e-149	501.3	Sinocyclocheilus rhinocerous	307959	cellular organisms;Eukaryota;Opisthokonta;Metazoa;Eumetazoa;Bilateria;Deuterostomia;Chordata;Craniata;Vertebrata;Gnathostomata;Teleostomi;Euteleostomi;Actinopterygii;Actinopteri;Neopterygii;Teleostei;Osteoglossocephalai;Clupeocephala;Otomorpha;Ostariophysi;Otophysi;Cypriniphysae;Cypriniformes;Cyprinoidei;Cyprinidae;Sinocyclocheilus;Sinocyclocheilus rhinocerous
UniRef100_UPI0007B9202F	1	UPI0007B9202F	zinc finger CCCH domain-containing protein 6-like isoform X2	1144	1-1048	3e-150	503.4	Sinocyclocheilus rhinocerous	307959	cellular organisms;Eukaryota;Opisthokonta;Metazoa;Eumetazoa;Bilateria;Deuterostomia;Chordata;Craniata;Vertebrata;Gnathostomata;Teleostomi;Euteleostomi;Actinopterygii;Actinopteri;Neopterygii;Teleostei;Osteoglossocephalai;Clupeocephala;Otomorpha;Ostariophysi;Otophysi;Cypriniphysae;Cypriniformes;Cyprinoidei;Cyprinidae;Sinocyclocheilus;Sinocyclocheilus rhinocerous
UniRef100_UPI0007ACA2D2	1	UPI0007ACA2D2	zinc finger CCCH domain-containing protein 6-like	1142	1-1035	8.2e-153	511.9	Sinocyclocheilus grahami (Dianchi golden-line fish) (Barbus grahami)	75366	cellular organisms;Eukaryota;Opisthokonta;Metazoa;Eumetazoa;Bilateria;Deuterostomia;Chordata;Craniata;Vertebrata;Gnathostomata;Teleostomi;Euteleostomi;Actinopterygii;Actinopteri;Neopterygii;Teleostei;Osteoglossocephalai;Clupeocephala;Otomorpha;Ostariophysi;Otophysi;Cypriniphysae;Cypriniformes;Cyprinoidei;Cyprinidae;Sinocyclocheilus;Sinocyclocheilus grahami
UniRef100_UPI0007BAD450	1	UPI0007BAD450	zinc finger CCCH domain-containing protein 6-like isoform X1	1145	1-1038	6.2e-153	512.3	Sinocyclocheilus anshuiensis	1608454	cellular organisms;Eukaryota;Opisthokonta;Metazoa;Eumetazoa;Bilateria;Deuterostomia;Chordata;Craniata;Vertebrata;Gnathostomata;Teleostomi;Euteleostomi;Actinopterygii;Actinopteri;Neopterygii;Teleostei;Osteoglossocephalai;Clupeocephala;Otomorpha;Ostariophysi;Otophysi;Cypriniphysae;Cypriniformes;Cyprinoidei;Cyprinidae;Sinocyclocheilus;Sinocyclocheilus anshuiensis
UniRef100_UPI0007B80F37	1	UPI0007B80F37	zinc finger CCCH domain-containing protein 6-like isoform X2	1140	1-1033	1.9e-150	504.1	Sinocyclocheilus anshuiensis	1608454	cellular organisms;Eukaryota;Opisthokonta;Metazoa;Eumetazoa;Bilateria;Deuterostomia;Chordata;Craniata;Vertebrata;Gnathostomata;Teleostomi;Euteleostomi;Actinopterygii;Actinopteri;Neopterygii;Teleostei;Osteoglossocephalai;Clupeocephala;Otomorpha;Ostariophysi;Otophysi;Cypriniphysae;Cypriniformes;Cyprinoidei;Cyprinidae;Sinocyclocheilus;Sinocyclocheilus anshuiensis
UniRef100_UPI0008FA2564	1	UPI0008FA2564	LOW QUALITY PROTEIN: zinc finger CCCH domain-containing protein 6-like	1128	1-1019	2.5e-145	487.1	Cyprinus carpio (Common carp)	7962	cellular organisms;Eukaryota;Opisthokonta;Metazoa;Eumetazoa;Bilateria;Deuterostomia;Chordata;Craniata;Vertebrata;Gnathostomata;Teleostomi;Euteleostomi;Actinopterygii;Actinopteri;Neopterygii;Teleostei;Osteoglossocephalai;Clupeocephala;Otomorpha;Ostariophysi;Otophysi;Cypriniphysae;Cypriniformes;Cyprinoidei;Cyprinidae;Cyprinus;Cyprinus carpio
UniRef100_UPI0007AD3DF6	1	UPI0007AD3DF6	zinc finger CCCH domain-containing protein 6-like	1125	10-1033	1.2e-150	504.8	Sinocyclocheilus grahami (Dianchi golden-line fish) (Barbus grahami)	75366	cellular organisms;Eukaryota;Opisthokonta;Metazoa;Eumetazoa;Bilateria;Deuterostomia;Chordata;Craniata;Vertebrata;Gnathostomata;Teleostomi;Euteleostomi;Actinopterygii;Actinopteri;Neopterygii;Teleostei;Osteoglossocephalai;Clupeocephala;Otomorpha;Ostariophysi;Otophysi;Cypriniphysae;Cypriniformes;Cyprinoidei;Cyprinidae;Sinocyclocheilus;Sinocyclocheilus grahami
UniRef100_UPI0007BA9767	1	UPI0007BA9767	zinc finger CCCH domain-containing protein 6-like	1143	1-1047	5.6e-150	502.5	Sinocyclocheilus rhinocerous	307959	cellular organisms;Eukaryota;Opisthokonta;Metazoa;Eumetazoa;Bilateria;Deuterostomia;Chordata;Craniata;Vertebrata;Gnathostomata;Teleostomi;Euteleostomi;Actinopterygii;Actinopteri;Neopterygii;Teleostei;Osteoglossocephalai;Clupeocephala;Otomorpha;Ostariophysi;Otophysi;Cypriniphysae;Cypriniformes;Cyprinoidei;Cyprinidae;Sinocyclocheilus;Sinocyclocheilus rhinocerous
UniRef100_UPI0007B96A29	1	UPI0007B96A29	zinc finger CCCH domain-containing protein 6-like	1143	1-1047	2.8e-149	500.2	Sinocyclocheilus anshuiensis	1608454	cellular organisms;Eukaryota;Opisthokonta;Metazoa;Eumetazoa;Bilateria;Deuterostomia;Chordata;Craniata;Vertebrata;Gnathostomata;Teleostomi;Euteleostomi;Actinopterygii;Actinopteri;Neopterygii;Teleostei;Osteoglossocephalai;Clupeocephala;Otomorpha;Ostariophysi;Otophysi;Cypriniphysae;Cypriniformes;Cyprinoidei;Cyprinidae;Sinocyclocheilus;Sinocyclocheilus anshuiensis
UniRef100_UPI000E4091D5	1	UPI000E4091D5	zinc finger CCCH domain-containing protein 6-like	1142	1-1052	1.2e-149	501.5	Carassius auratus (Goldfish)	7957	cellular organisms;Eukaryota;Opisthokonta;Metazoa;Eumetazoa;Bilateria;Deuterostomia;Chordata;Craniata;Vertebrata;Gnathostomata;Teleostomi;Euteleostomi;Actinopterygii;Actinopteri;Neopterygii;Teleostei;Osteoglossocephalai;Clupeocephala;Otomorpha;Ostariophysi;Otophysi;Cypriniphysae;Cypriniformes;Cyprinoidei;Cyprinidae;Carassius;Carassius auratus
UniRef100_UPI000E404529	1	UPI000E404529	LOW QUALITY PROTEIN: zinc finger CCCH domain-containing protein 6-like	1126	9-1036	1.1e-144	485.0	Carassius auratus (Goldfish)	7957	cellular organisms;Eukaryota;Opisthokonta;Metazoa;Eumetazoa;Bilateria;Deuterostomia;Chordata;Craniata;Vertebrata;Gnathostomata;Teleostomi;Euteleostomi;Actinopterygii;Actinopteri;Neopterygii;Teleostei;Osteoglossocephalai;Clupeocephala;Otomorpha;Ostariophysi;Otophysi;Cypriniphysae;Cypriniformes;Cyprinoidei;Cyprinidae;Carassius;Carassius auratus
UniRef100_A0A5A9PBE7	1	A0A5A9PBE7	Zinc finger CCCH domain-containing protein 6	1142	1-1054	1.2e-147	494.8	Triplophysa tibetana	1572043	cellular organisms;Eukaryota;Opisthokonta;Metazoa;Eumetazoa;Bilateria;Deuterostomia;Chordata;Craniata;Vertebrata;Gnathostomata;Teleostomi;Euteleostomi;Actinopterygii;Actinopteri;Neopterygii;Teleostei;Osteoglossocephalai;Clupeocephala;Otomorpha;Ostariophysi;Otophysi;Cypriniphysae;Cypriniformes;Cobitoidei;Nemacheilidae;Triplophysa;Triplophysa tibetana
UniRef100_UPI0011F2F11E	1	UPI0011F2F11E	zinc finger CCCH domain-containing protein 6	1181	1-1095	7.1e-140	469.1	Chanos chanos (Milkfish) (Mugil chanos)	29144	cellular organisms;Eukaryota;Opisthokonta;Metazoa;Eumetazoa;Bilateria;Deuterostomia;Chordata;Craniata;Vertebrata;Gnathostomata;Teleostomi;Euteleostomi;Actinopterygii;Actinopteri;Neopterygii;Teleostei;Osteoglossocephalai;Clupeocephala;Otomorpha;Ostariophysi;Anotophysi;Gonorynchiformes;Chanoidei;Chanidae;Chanos;Chanos chanos
UniRef100_UPI000B3659D9	1	UPI000B3659D9	zinc finger CCCH domain-containing protein 6-like	1298	1-1197	9.7e-168	561.3	Fundulus heteroclitus (Killifish) (Mummichog)	8078	cellular organisms;Eukaryota;Opisthokonta;Metazoa;Eumetazoa;Bilateria;Deuterostomia;Chordata;Craniata;Vertebrata;Gnathostomata;Teleostomi;Euteleostomi;Actinopterygii;Actinopteri;Neopterygii;Teleostei;Osteoglossocephalai;Clupeocephala;Euteleosteomorpha;Neoteleostei;Eurypterygia;Ctenosquamata;Acanthomorphata;Euacanthomorphacea;Percomorphaceae;Ovalentaria;Atherinomorphae;Cyprinodontiformes;Cyprinodo…
UniRef100_UPI0007426857	1	UPI0007426857	zinc finger CCCH domain-containing protein 6-like	1153	1-1051	3.6e-161	539.5	Cyprinodon variegatus (Sheepshead minnow)	28743	cellular organisms;Eukaryota;Opisthokonta;Metazoa;Eumetazoa;Bilateria;Deuterostomia;Chordata;Craniata;Vertebrata;Gnathostomata;Teleostomi;Euteleostomi;Actinopterygii;Actinopteri;Neopterygii;Teleostei;Osteoglossocephalai;Clupeocephala;Euteleosteomorpha;Neoteleostei;Eurypterygia;Ctenosquamata;Acanthomorphata;Euacanthomorphacea;Percomorphaceae;Ovalentaria;Atherinomorphae;Cyprinodontiformes;Cyprinodo…
UniRef100_UPI0004440A35	1	UPI0004440A35	zinc finger CCCH domain-containing protein 6-like isoform X1	1150	3-1046	3.6e-163	546.2	Poecilia formosa (Amazon molly) (Limia formosa)	48698	cellular organisms;Eukaryota;Opisthokonta;Metazoa;Eumetazoa;Bilateria;Deuterostomia;Chordata;Craniata;Vertebrata;Gnathostomata;Teleostomi;Euteleostomi;Actinopterygii;Actinopteri;Neopterygii;Teleostei;Osteoglossocephalai;Clupeocephala;Euteleosteomorpha;Neoteleostei;Eurypterygia;Ctenosquamata;Acanthomorphata;Euacanthomorphacea;Percomorphaceae;Ovalentaria;Atherinomorphae;Cyprinodontiformes;Cyprinodo…
UniRef100_A0A087YCR9	1	A0A087YCR9	Zinc finger CCCH-type containing 6	1138	18-1034	2.5e-162	543.4	Poecilia formosa (Amazon molly) (Limia formosa)	48698	cellular organisms;Eukaryota;Opisthokonta;Metazoa;Eumetazoa;Bilateria;Deuterostomia;Chordata;Craniata;Vertebrata;Gnathostomata;Teleostomi;Euteleostomi;Actinopterygii;Actinopteri;Neopterygii;Teleostei;Osteoglossocephalai;Clupeocephala;Euteleosteomorpha;Neoteleostei;Eurypterygia;Ctenosquamata;Acanthomorphata;Euacanthomorphacea;Percomorphaceae;Ovalentaria;Atherinomorphae;Cyprinodontiformes;Cyprinodo…
UniRef100_UPI00072E0DC0	1	UPI00072E0DC0	zinc finger CCCH domain-containing protein 6-like isoform X1	1150	3-1046	3e-162	543.1	Poecilia latipinna (sailfin molly)	48699	cellular organisms;Eukaryota;Opisthokonta;Metazoa;Eumetazoa;Bilateria;Deuterostomia;Chordata;Craniata;Vertebrata;Gnathostomata;Teleostomi;Euteleostomi;Actinopterygii;Actinopteri;Neopterygii;Teleostei;Osteoglossocephalai;Clupeocephala;Euteleosteomorpha;Neoteleostei;Eurypterygia;Ctenosquamata;Acanthomorphata;Euacanthomorphacea;Percomorphaceae;Ovalentaria;Atherinomorphae;Cyprinodontiformes;Cyprinodo…
UniRef100_A0A3B3TLE8	1	A0A3B3TLE8	Zinc finger CCCH-type containing 6	1138	18-1034	1.9e-156	523.9	Poecilia latipinna (sailfin molly)	48699	cellular organisms;Eukaryota;Opisthokonta;Metazoa;Eumetazoa;Bilateria;Deuterostomia;Chordata;Craniata;Vertebrata;Gnathostomata;Teleostomi;Euteleostomi;Actinopterygii;Actinopteri;Neopterygii;Teleostei;Osteoglossocephalai;Clupeocephala;Euteleosteomorpha;Neoteleostei;Eurypterygia;Ctenosquamata;Acanthomorphata;Euacanthomorphacea;Percomorphaceae;Ovalentaria;Atherinomorphae;Cyprinodontiformes;Cyprinodo…
UniRef100_A0A3B3YZC0	4	A0A3B3YZC0	Zinc finger CCCH-type containing 6	965	4-861	2.8e-135	453.9	Poecilia mexicana	48701	cellular organisms;Eukaryota;Opisthokonta;Metazoa;Eumetazoa;Bilateria;Deuterostomia;Chordata;Craniata;Vertebrata;Gnathostomata;Teleostomi;Euteleostomi;Actinopterygii;Actinopteri;Neopterygii;Teleostei;Osteoglossocephalai;Clupeocephala;Euteleosteomorpha;Neoteleostei;Eurypterygia;Ctenosquamata;Acanthomorphata;Euacanthomorphacea;Percomorphaceae;Ovalentaria;Atherinomorphae;Cyprinodontiformes;Cyprinodo…
UniRef100_UPI00072DF850	1	UPI00072DF850	zinc finger CCCH domain-containing protein 6-like isoform X3	1127	7-1023	8.1e-162	541.7	Poecilia mexicana	48701	cellular organisms;Eukaryota;Opisthokonta;Metazoa;Eumetazoa;Bilateria;Deuterostomia;Chordata;Craniata;Vertebrata;Gnathostomata;Teleostomi;Euteleostomi;Actinopterygii;Actinopteri;Neopterygii;Teleostei;Osteoglossocephalai;Clupeocephala;Euteleosteomorpha;Neoteleostei;Eurypterygia;Ctenosquamata;Acanthomorphata;Euacanthomorphacea;Percomorphaceae;Ovalentaria;Atherinomorphae;Cyprinodontiformes;Cyprinodo…
UniRef100_UPI00072DF5D0	1	UPI00072DF5D0	zinc finger CCCH domain-containing protein 6-like isoform X2	1138	18-1034	8.1e-162	541.7	Poecilia mexicana	48701	cellular organisms;Eukaryota;Opisthokonta;Metazoa;Eumetazoa;Bilateria;Deuterostomia;Chordata;Craniata;Vertebrata;Gnathostomata;Teleostomi;Euteleostomi;Actinopterygii;Actinopteri;Neopterygii;Teleostei;Osteoglossocephalai;Clupeocephala;Euteleosteomorpha;Neoteleostei;Eurypterygia;Ctenosquamata;Acanthomorphata;Euacanthomorphacea;Percomorphaceae;Ovalentaria;Atherinomorphae;Cyprinodontiformes;Cyprinodo…
UniRef100_UPI0004A4D55B	1	UPI0004A4D55B	zinc finger CCCH domain-containing protein 6 isoform X1	1154	1-1050	2.7e-162	543.3	Poecilia reticulata (Guppy) (Acanthophacelus reticulatus)	8081	cellular organisms;Eukaryota;Opisthokonta;Metazoa;Eumetazoa;Bilateria;Deuterostomia;Chordata;Craniata;Vertebrata;Gnathostomata;Teleostomi;Euteleostomi;Actinopterygii;Actinopteri;Neopterygii;Teleostei;Osteoglossocephalai;Clupeocephala;Euteleosteomorpha;Neoteleostei;Eurypterygia;Ctenosquamata;Acanthomorphata;Euacanthomorphacea;Percomorphaceae;Ovalentaria;Atherinomorphae;Cyprinodontiformes;Cyprinodo…
UniRef100_UPI0004A4F2FA	1	UPI0004A4F2FA	zinc finger CCCH domain-containing protein 6 isoform X2	1142	18-1038	1.7e-160	537.3	Poecilia reticulata (Guppy) (Acanthophacelus reticulatus)	8081	cellular organisms;Eukaryota;Opisthokonta;Metazoa;Eumetazoa;Bilateria;Deuterostomia;Chordata;Craniata;Vertebrata;Gnathostomata;Teleostomi;Euteleostomi;Actinopterygii;Actinopteri;Neopterygii;Teleostei;Osteoglossocephalai;Clupeocephala;Euteleosteomorpha;Neoteleostei;Eurypterygia;Ctenosquamata;Acanthomorphata;Euacanthomorphacea;Percomorphaceae;Ovalentaria;Atherinomorphae;Cyprinodontiformes;Cyprinodo…
UniRef100_A0A3P9QJ12	1	A0A3P9QJ12	Zinc finger CCCH-type containing 6	1018	136-914	4.3e-129	433.4	Poecilia reticulata (Guppy) (Acanthophacelus reticulatus)	8081	cellular organisms;Eukaryota;Opisthokonta;Metazoa;Eumetazoa;Bilateria;Deuterostomia;Chordata;Craniata;Vertebrata;Gnathostomata;Teleostomi;Euteleostomi;Actinopterygii;Actinopteri;Neopterygii;Teleostei;Osteoglossocephalai;Clupeocephala;Euteleosteomorpha;Neoteleostei;Eurypterygia;Ctenosquamata;Acanthomorphata;Euacanthomorphacea;Percomorphaceae;Ovalentaria;Atherinomorphae;Cyprinodontiformes;Cyprinodo…
UniRef100_A0A3B5PWP1	1	A0A3B5PWP1	Zinc finger CCCH-type containing 6	1152	1-1058	7.4e-163	545.1	Xiphophorus maculatus (Southern platyfish) (Platypoecilus maculatus)	8083	cellular organisms;Eukaryota;Opisthokonta;Metazoa;Eumetazoa;Bilateria;Deuterostomia;Chordata;Craniata;Vertebrata;Gnathostomata;Teleostomi;Euteleostomi;Actinopterygii;Actinopteri;Neopterygii;Teleostei;Osteoglossocephalai;Clupeocephala;Euteleosteomorpha;Neoteleostei;Eurypterygia;Ctenosquamata;Acanthomorphata;Euacanthomorphacea;Percomorphaceae;Ovalentaria;Atherinomorphae;Cyprinodontiformes;Cyprinodo…
UniRef100_UPI000C6EA360	1	UPI000C6EA360	zinc finger CCCH domain-containing protein 6 isoform X2	1140	18-1049	1.3e-157	527.8	Xiphophorus maculatus (Southern platyfish) (Platypoecilus maculatus)	8083	cellular organisms;Eukaryota;Opisthokonta;Metazoa;Eumetazoa;Bilateria;Deuterostomia;Chordata;Craniata;Vertebrata;Gnathostomata;Teleostomi;Euteleostomi;Actinopterygii;Actinopteri;Neopterygii;Teleostei;Osteoglossocephalai;Clupeocephala;Euteleosteomorpha;Neoteleostei;Eurypterygia;Ctenosquamata;Acanthomorphata;Euacanthomorphacea;Percomorphaceae;Ovalentaria;Atherinomorphae;Cyprinodontiformes;Cyprinodo…
UniRef100_UPI001016388E	1	UPI001016388E	zinc finger CCCH domain-containing protein 6 isoform X1	1152	1-1051	1.5e-161	540.8	Xiphophorus couchianus (Monterrey platyfish)	32473	cellular organisms;Eukaryota;Opisthokonta;Metazoa;Eumetazoa;Bilateria;Deuterostomia;Chordata;Craniata;Vertebrata;Gnathostomata;Teleostomi;Euteleostomi;Actinopterygii;Actinopteri;Neopterygii;Teleostei;Osteoglossocephalai;Clupeocephala;Euteleosteomorpha;Neoteleostei;Eurypterygia;Ctenosquamata;Acanthomorphata;Euacanthomorphacea;Percomorphaceae;Ovalentaria;Atherinomorphae;Cyprinodontiformes;Cyprinodo…
UniRef100_UPI001016EE8C	1	UPI001016EE8C	zinc finger CCCH domain-containing protein 6 isoform X2	1140	18-1039	2.5e-161	540.1	Xiphophorus couchianus (Monterrey platyfish)	32473	cellular organisms;Eukaryota;Opisthokonta;Metazoa;Eumetazoa;Bilateria;Deuterostomia;Chordata;Craniata;Vertebrata;Gnathostomata;Teleostomi;Euteleostomi;Actinopterygii;Actinopteri;Neopterygii;Teleostei;Osteoglossocephalai;Clupeocephala;Euteleosteomorpha;Neoteleostei;Eurypterygia;Ctenosquamata;Acanthomorphata;Euacanthomorphacea;Percomorphaceae;Ovalentaria;Atherinomorphae;Cyprinodontiformes;Cyprinodo…
UniRef100_A0A3B5LWZ3	1	A0A3B5LWZ3	Zinc finger CCCH-type containing 6	873	136-860	1.4e-131	441.6	Xiphophorus couchianus (Monterrey platyfish)	32473	cellular organisms;Eukaryota;Opisthokonta;Metazoa;Eumetazoa;Bilateria;Deuterostomia;Chordata;Craniata;Vertebrata;Gnathostomata;Teleostomi;Euteleostomi;Actinopterygii;Actinopteri;Neopterygii;Teleostei;Osteoglossocephalai;Clupeocephala;Euteleosteomorpha;Neoteleostei;Eurypterygia;Ctenosquamata;Acanthomorphata;Euacanthomorphacea;Percomorphaceae;Ovalentaria;Atherinomorphae;Cyprinodontiformes;Cyprinodo…
UniRef100_A0A3B5LTS3	1	A0A3B5LTS3	Zinc finger CCCH-type containing 6	863	83-787	2.7e-101	341.5	Xiphophorus couchianus (Monterrey platyfish)	32473	cellular organisms;Eukaryota;Opisthokonta;Metazoa;Eumetazoa;Bilateria;Deuterostomia;Chordata;Craniata;Vertebrata;Gnathostomata;Teleostomi;Euteleostomi;Actinopterygii;Actinopteri;Neopterygii;Teleostei;Osteoglossocephalai;Clupeocephala;Euteleosteomorpha;Neoteleostei;Eurypterygia;Ctenosquamata;Acanthomorphata;Euacanthomorphacea;Percomorphaceae;Ovalentaria;Atherinomorphae;Cyprinodontiformes;Cyprinodo…
UniRef100_A0A315VRM7	1	A0A315VRM7	C3H1-type domain-containing protein	1108	1-984	1.8e-115	388.3	Gambusia affinis (Western mosquitofish) (Heterandria affinis)	33528	cellular organisms;Eukaryota;Opisthokonta;Metazoa;Eumetazoa;Bilateria;Deuterostomia;Chordata;Craniata;Vertebrata;Gnathostomata;Teleostomi;Euteleostomi;Actinopterygii;Actinopteri;Neopterygii;Teleostei;Osteoglossocephalai;Clupeocephala;Euteleosteomorpha;Neoteleostei;Eurypterygia;Ctenosquamata;Acanthomorphata;Euacanthomorphacea;Percomorphaceae;Ovalentaria;Atherinomorphae;Cyprinodontiformes;Cyprinodo…
UniRef100_A0A3Q3AZ61	1	A0A3Q3AZ61	Zinc finger CCCH-type containing 6	1151	1-1053	2e-145	487.5	Kryptolebias marmoratus (Mangrove killifish) (Rivulus marmoratus)	37003	cellular organisms;Eukaryota;Opisthokonta;Metazoa;Eumetazoa;Bilateria;Deuterostomia;Chordata;Craniata;Vertebrata;Gnathostomata;Teleostomi;Euteleostomi;Actinopterygii;Actinopteri;Neopterygii;Teleostei;Osteoglossocephalai;Clupeocephala;Euteleosteomorpha;Neoteleostei;Eurypterygia;Ctenosquamata;Acanthomorphata;Euacanthomorphacea;Percomorphaceae;Ovalentaria;Atherinomorphae;Cyprinodontiformes;Aplocheil…
UniRef100_UPI0007F8FE8E	1	UPI0007F8FE8E	zinc finger CCCH domain-containing protein 6 isoform X2	1139	18-1041	4.4e-144	483.1	Kryptolebias marmoratus (Mangrove killifish) (Rivulus marmoratus)	37003	cellular organisms;Eukaryota;Opisthokonta;Metazoa;Eumetazoa;Bilateria;Deuterostomia;Chordata;Craniata;Vertebrata;Gnathostomata;Teleostomi;Euteleostomi;Actinopterygii;Actinopteri;Neopterygii;Teleostei;Osteoglossocephalai;Clupeocephala;Euteleosteomorpha;Neoteleostei;Eurypterygia;Ctenosquamata;Acanthomorphata;Euacanthomorphacea;Percomorphaceae;Ovalentaria;Atherinomorphae;Cyprinodontiformes;Aplocheil…
UniRef100_A0A2I4AYR9	1	A0A2I4AYR9	zinc finger CCCH domain-containing protein 6	1148	1-1048	1.5e-135	454.8	Austrofundulus limnaeus	52670	cellular organisms;Eukaryota;Opisthokonta;Metazoa;Eumetazoa;Bilateria;Deuterostomia;Chordata;Craniata;Vertebrata;Gnathostomata;Teleostomi;Euteleostomi;Actinopterygii;Actinopteri;Neopterygii;Teleostei;Osteoglossocephalai;Clupeocephala;Euteleosteomorpha;Neoteleostei;Eurypterygia;Ctenosquamata;Acanthomorphata;Euacanthomorphacea;Percomorphaceae;Ovalentaria;Atherinomorphae;Cyprinodontiformes;Aplocheil…
UniRef100_A0A1A8HZ01	1	A0A1A8HZ01	Uncharacterized protein	1131	1-1039	8.3e-144	482.1	Nothobranchius kuhntae (Beira killifish)	321403	cellular organisms;Eukaryota;Opisthokonta;Metazoa;Eumetazoa;Bilateria;Deuterostomia;Chordata;Craniata;Vertebrata;Gnathostomata;Teleostomi;Euteleostomi;Actinopterygii;Actinopteri;Neopterygii;Teleostei;Osteoglossocephalai;Clupeocephala;Euteleosteomorpha;Neoteleostei;Eurypterygia;Ctenosquamata;Acanthomorphata;Euacanthomorphacea;Percomorphaceae;Ovalentaria;Atherinomorphae;Cyprinodontiformes;Aplocheil…
UniRef100_A0A1A8KGI1	1	A0A1A8KGI1	Uncharacterized protein (Fragment)	875	11-784	6.1e-109	366.8	Nothobranchius kuhntae (Beira killifish)	321403	cellular organisms;Eukaryota;Opisthokonta;Metazoa;Eumetazoa;Bilateria;Deuterostomia;Chordata;Craniata;Vertebrata;Gnathostomata;Teleostomi;Euteleostomi;Actinopterygii;Actinopteri;Neopterygii;Teleostei;Osteoglossocephalai;Clupeocephala;Euteleosteomorpha;Neoteleostei;Eurypterygia;Ctenosquamata;Acanthomorphata;Euacanthomorphacea;Percomorphaceae;Ovalentaria;Atherinomorphae;Cyprinodontiformes;Aplocheil…
UniRef100_UPI00077D3A95	1	UPI00077D3A95	zinc finger CCCH domain-containing protein 6-like isoform X1	1136	1-1038	3e-140	470.4	Nothobranchius furzeri (Turquoise killifish)	105023	cellular organisms;Eukaryota;Opisthokonta;Metazoa;Eumetazoa;Bilateria;Deuterostomia;Chordata;Craniata;Vertebrata;Gnathostomata;Teleostomi;Euteleostomi;Actinopterygii;Actinopteri;Neopterygii;Teleostei;Osteoglossocephalai;Clupeocephala;Euteleosteomorpha;Neoteleostei;Eurypterygia;Ctenosquamata;Acanthomorphata;Euacanthomorphacea;Percomorphaceae;Ovalentaria;Atherinomorphae;Cyprinodontiformes;Aplocheil…
UniRef100_A0A1A7ZN10	1	A0A1A7ZN10	Uncharacterized protein	1135	1-1035	3.4e-140	470.2	Nothobranchius furzeri (Turquoise killifish)	105023	cellular organisms;Eukaryota;Opisthokonta;Metazoa;Eumetazoa;Bilateria;Deuterostomia;Chordata;Craniata;Vertebrata;Gnathostomata;Teleostomi;Euteleostomi;Actinopterygii;Actinopteri;Neopterygii;Teleostei;Osteoglossocephalai;Clupeocephala;Euteleosteomorpha;Neoteleostei;Eurypterygia;Ctenosquamata;Acanthomorphata;Euacanthomorphacea;Percomorphaceae;Ovalentaria;Atherinomorphae;Cyprinodontiformes;Aplocheil…
UniRef100_A0A1A8QWV4	1	A0A1A8QWV4	Uncharacterized protein	1142	1-1026	1.8e-141	474.4	Nothobranchius rachovii (bluefin notho)	451742	cellular organisms;Eukaryota;Opisthokonta;Metazoa;Eumetazoa;Bilateria;Deuterostomia;Chordata;Craniata;Vertebrata;Gnathostomata;Teleostomi;Euteleostomi;Actinopterygii;Actinopteri;Neopterygii;Teleostei;Osteoglossocephalai;Clupeocephala;Euteleosteomorpha;Neoteleostei;Eurypterygia;Ctenosquamata;Acanthomorphata;Euacanthomorphacea;Percomorphaceae;Ovalentaria;Atherinomorphae;Cyprinodontiformes;Aplocheil…
UniRef100_A0A1A8QIN0	1	A0A1A8QIN0	Uncharacterized protein	1143	1-1027	2.1e-141	474.2	Nothobranchius rachovii (bluefin notho)	451742	cellular organisms;Eukaryota;Opisthokonta;Metazoa;Eumetazoa;Bilateria;Deuterostomia;Chordata;Craniata;Vertebrata;Gnathostomata;Teleostomi;Euteleostomi;Actinopterygii;Actinopteri;Neopterygii;Teleostei;Osteoglossocephalai;Clupeocephala;Euteleosteomorpha;Neoteleostei;Eurypterygia;Ctenosquamata;Acanthomorphata;Euacanthomorphacea;Percomorphaceae;Ovalentaria;Atherinomorphae;Cyprinodontiformes;Aplocheil…
UniRef100_A0A1A8MGB6	2	A0A1A8MGB6	Uncharacterized protein	1140	1-1028	1.4e-140	471.5	Nothobranchius pienaari	704102	cellular organisms;Eukaryota;Opisthokonta;Metazoa;Eumetazoa;Bilateria;Deuterostomia;Chordata;Craniata;Vertebrata;Gnathostomata;Teleostomi;Euteleostomi;Actinopterygii;Actinopteri;Neopterygii;Teleostei;Osteoglossocephalai;Clupeocephala;Euteleosteomorpha;Neoteleostei;Eurypterygia;Ctenosquamata;Acanthomorphata;Euacanthomorphacea;Percomorphaceae;Ovalentaria;Atherinomorphae;Cyprinodontiformes;Aplocheil…
UniRef100_A0A1A8FHZ0	1	A0A1A8FHZ0	Uncharacterized protein (Fragment)	762	1-723	1.3e-102	345.8	Nothobranchius korthausae	1143690	cellular organisms;Eukaryota;Opisthokonta;Metazoa;Eumetazoa;Bilateria;Deuterostomia;Chordata;Craniata;Vertebrata;Gnathostomata;Teleostomi;Euteleostomi;Actinopterygii;Actinopteri;Neopterygii;Teleostei;Osteoglossocephalai;Clupeocephala;Euteleosteomorpha;Neoteleostei;Eurypterygia;Ctenosquamata;Acanthomorphata;Euacanthomorphacea;Percomorphaceae;Ovalentaria;Atherinomorphae;Cyprinodontiformes;Aplocheil…
UniRef100_A0A1A8HEQ2	1	A0A1A8HEQ2	Uncharacterized protein (Fragment)	767	1-727	2.5e-101	341.6	Nothobranchius korthausae	1143690	cellular organisms;Eukaryota;Opisthokonta;Metazoa;Eumetazoa;Bilateria;Deuterostomia;Chordata;Craniata;Vertebrata;Gnathostomata;Teleostomi;Euteleostomi;Actinopterygii;Actinopteri;Neopterygii;Teleostei;Osteoglossocephalai;Clupeocephala;Euteleosteomorpha;Neoteleostei;Eurypterygia;Ctenosquamata;Acanthomorphata;Euacanthomorphacea;Percomorphaceae;Ovalentaria;Atherinomorphae;Cyprinodontiformes;Aplocheil…
UniRef100_A0A1A7X9Q4	1	A0A1A7X9Q4	Uncharacterized protein	1096	4-1008	8.6e-137	458.9	Iconisemion striatum	60296	cellular organisms;Eukaryota;Opisthokonta;Metazoa;Eumetazoa;Bilateria;Deuterostomia;Chordata;Craniata;Vertebrata;Gnathostomata;Teleostomi;Euteleostomi;Actinopterygii;Actinopteri;Neopterygii;Teleostei;Osteoglossocephalai;Clupeocephala;Euteleosteomorpha;Neoteleostei;Eurypterygia;Ctenosquamata;Acanthomorphata;Euacanthomorphacea;Percomorphaceae;Ovalentaria;Atherinomorphae;Cyprinodontiformes;Aplocheil…
UniRef100_A0A1A7XY51	2	A0A1A7XY51	Uncharacterized protein (Fragment)	866	13-778	1.7e-107	362.0	Iconisemion striatum	60296	cellular organisms;Eukaryota;Opisthokonta;Metazoa;Eumetazoa;Bilateria;Deuterostomia;Chordata;Craniata;Vertebrata;Gnathostomata;Teleostomi;Euteleostomi;Actinopterygii;Actinopteri;Neopterygii;Teleostei;Osteoglossocephalai;Clupeocephala;Euteleosteomorpha;Neoteleostei;Eurypterygia;Ctenosquamata;Acanthomorphata;Euacanthomorphacea;Percomorphaceae;Ovalentaria;Atherinomorphae;Cyprinodontiformes;Aplocheil…
UniRef100_H2M6D1	1	H2M6D1	Zinc finger CCCH-type containing 6	1131	1-1024	1.4e-155	521.0	Oryzias latipes (Japanese rice fish) (Japanese killifish)	8090	cellular organisms;Eukaryota;Opisthokonta;Metazoa;Eumetazoa;Bilateria;Deuterostomia;Chordata;Craniata;Vertebrata;Gnathostomata;Teleostomi;Euteleostomi;Actinopterygii;Actinopteri;Neopterygii;Teleostei;Osteoglossocephalai;Clupeocephala;Euteleosteomorpha;Neoteleostei;Eurypterygia;Ctenosquamata;Acanthomorphata;Euacanthomorphacea;Percomorphaceae;Ovalentaria;Atherinomorphae;Beloniformes;Adrianichthyoid…
UniRef100_UPI000CE2487E	1	UPI000CE2487E	zinc finger CCCH domain-containing protein 6 isoform X1	1158	1-1052	1.4e-151	507.9	Oryzias latipes (Japanese rice fish) (Japanese killifish)	8090	cellular organisms;Eukaryota;Opisthokonta;Metazoa;Eumetazoa;Bilateria;Deuterostomia;Chordata;Craniata;Vertebrata;Gnathostomata;Teleostomi;Euteleostomi;Actinopterygii;Actinopteri;Neopterygii;Teleostei;Osteoglossocephalai;Clupeocephala;Euteleosteomorpha;Neoteleostei;Eurypterygia;Ctenosquamata;Acanthomorphata;Euacanthomorphacea;Percomorphaceae;Ovalentaria;Atherinomorphae;Beloniformes;Adrianichthyoid…
UniRef100_A0A3B3H5L8	1	A0A3B3H5L8	Zinc finger CCCH-type containing 6	1161	1-1056	2.3e-154	517.0	Oryzias latipes (Japanese rice fish) (Japanese killifish)	8090	cellular organisms;Eukaryota;Opisthokonta;Metazoa;Eumetazoa;Bilateria;Deuterostomia;Chordata;Craniata;Vertebrata;Gnathostomata;Teleostomi;Euteleostomi;Actinopterygii;Actinopteri;Neopterygii;Teleostei;Osteoglossocephalai;Clupeocephala;Euteleosteomorpha;Neoteleostei;Eurypterygia;Ctenosquamata;Acanthomorphata;Euacanthomorphacea;Percomorphaceae;Ovalentaria;Atherinomorphae;Beloniformes;Adrianichthyoid…
UniRef100_A0A3P9MFY5	1	A0A3P9MFY5	Zinc finger CCCH-type containing 6	1131	1-1024	1.5e-153	514.4	Oryzias latipes (Japanese rice fish) (Japanese killifish)	8090	cellular organisms;Eukaryota;Opisthokonta;Metazoa;Eumetazoa;Bilateria;Deuterostomia;Chordata;Craniata;Vertebrata;Gnathostomata;Teleostomi;Euteleostomi;Actinopterygii;Actinopteri;Neopterygii;Teleostei;Osteoglossocephalai;Clupeocephala;Euteleosteomorpha;Neoteleostei;Eurypterygia;Ctenosquamata;Acanthomorphata;Euacanthomorphacea;Percomorphaceae;Ovalentaria;Atherinomorphae;Beloniformes;Adrianichthyoid…
UniRef100_A0A3P9GZY9	1	A0A3P9GZY9	Zinc finger CCCH-type containing 6	1131	1-1034	1.5e-152	511.1	Oryzias latipes (Japanese rice fish) (Japanese killifish)	8090	cellular organisms;Eukaryota;Opisthokonta;Metazoa;Eumetazoa;Bilateria;Deuterostomia;Chordata;Craniata;Vertebrata;Gnathostomata;Teleostomi;Euteleostomi;Actinopterygii;Actinopteri;Neopterygii;Teleostei;Osteoglossocephalai;Clupeocephala;Euteleosteomorpha;Neoteleostei;Eurypterygia;Ctenosquamata;Acanthomorphata;Euacanthomorphacea;Percomorphaceae;Ovalentaria;Atherinomorphae;Beloniformes;Adrianichthyoid…
UniRef100_UPI000CF83C6E	1	UPI000CF83C6E	zinc finger CCCH domain-containing protein 6-like isoform X1	1151	1-1042	7.5e-153	512.0	Oryzias melastigma (Marine medaka)	30732	cellular organisms;Eukaryota;Opisthokonta;Metazoa;Eumetazoa;Bilateria;Deuterostomia;Chordata;Craniata;Vertebrata;Gnathostomata;Teleostomi;Euteleostomi;Actinopterygii;Actinopteri;Neopterygii;Teleostei;Osteoglossocephalai;Clupeocephala;Euteleosteomorpha;Neoteleostei;Eurypterygia;Ctenosquamata;Acanthomorphata;Euacanthomorphacea;Percomorphaceae;Ovalentaria;Atherinomorphae;Beloniformes;Adrianichthyoid…
UniRef100_A0A3B3CXV0	1	A0A3B3CXV0	Zinc finger CCCH-type containing 6	1138	1-1030	3.8e-152	509.7	Oryzias melastigma (Marine medaka)	30732	cellular organisms;Eukaryota;Opisthokonta;Metazoa;Eumetazoa;Bilateria;Deuterostomia;Chordata;Craniata;Vertebrata;Gnathostomata;Teleostomi;Euteleostomi;Actinopterygii;Actinopteri;Neopterygii;Teleostei;Osteoglossocephalai;Clupeocephala;Euteleosteomorpha;Neoteleostei;Eurypterygia;Ctenosquamata;Acanthomorphata;Euacanthomorphacea;Percomorphaceae;Ovalentaria;Atherinomorphae;Beloniformes;Adrianichthyoid…
UniRef100_UPI0010566F4A	1	UPI0010566F4A	zinc finger CCCH domain-containing protein 6	1091	1-983	1.8e-134	451.3	Gouania willdenowi (blunt-snouted clingfish)	441366	cellular organisms;Eukaryota;Opisthokonta;Metazoa;Eumetazoa;Bilateria;Deuterostomia;Chordata;Craniata;Vertebrata;Gnathostomata;Teleostomi;Euteleostomi;Actinopterygii;Actinopteri;Neopterygii;Teleostei;Osteoglossocephalai;Clupeocephala;Euteleosteomorpha;Neoteleostei;Eurypterygia;Ctenosquamata;Acanthomorphata;Euacanthomorphacea;Percomorphaceae;Ovalentaria;Blenniimorphae;Blenniiformes;Gobiesocoidei;G…
UniRef100_UPI00117671D6	1	UPI00117671D6	zinc finger CCCH domain-containing protein 6	1149	1-1057	8.3e-140	468.9	Salarias fasciatus (Jewelled blenny) (Blennius fasciatus)	181472	cellular organisms;Eukaryota;Opisthokonta;Metazoa;Eumetazoa;Bilateria;Deuterostomia;Chordata;Craniata;Vertebrata;Gnathostomata;Teleostomi;Euteleostomi;Actinopterygii;Actinopteri;Neopterygii;Teleostei;Osteoglossocephalai;Clupeocephala;Euteleosteomorpha;Neoteleostei;Eurypterygia;Ctenosquamata;Acanthomorphata;Euacanthomorphacea;Percomorphaceae;Ovalentaria;Blenniimorphae;Blenniiformes;Blennioidei;Ble…
UniRef100_A0A3P8VV99	2	A0A3P8VV99	Zinc finger CCCH-type containing 6	968	22-809	3.7e-113	380.7	Cynoglossus semilaevis (Tongue sole)	244447	cellular organisms;Eukaryota;Opisthokonta;Metazoa;Eumetazoa;Bilateria;Deuterostomia;Chordata;Craniata;Vertebrata;Gnathostomata;Teleostomi;Euteleostomi;Actinopterygii;Actinopteri;Neopterygii;Teleostei;Osteoglossocephalai;Clupeocephala;Euteleosteomorpha;Neoteleostei;Eurypterygia;Ctenosquamata;Acanthomorphata;Euacanthomorphacea;Percomorphaceae;Carangaria;Pleuronectiformes;Pleuronectoidei;Cynoglossid…
UniRef100_UPI0003AFF00C	1	UPI0003AFF00C	zinc finger CCCH domain-containing protein 6-like	1159	1-1059	2.6e-160	536.7	Pundamilia nyererei	303518	cellular organisms;Eukaryota;Opisthokonta;Metazoa;Eumetazoa;Bilateria;Deuterostomia;Chordata;Craniata;Vertebrata;Gnathostomata;Teleostomi;Euteleostomi;Actinopterygii;Actinopteri;Neopterygii;Teleostei;Osteoglossocephalai;Clupeocephala;Euteleosteomorpha;Neoteleostei;Eurypterygia;Ctenosquamata;Acanthomorphata;Euacanthomorphacea;Percomorphaceae;Ovalentaria;Cichlomorphae;Cichliformes;Cichlidae;African…
UniRef100_A0A3B4GLY4	1	A0A3B4GLY4	Zinc finger CCCH-type containing 6	1012	139-915	1.8e-123	414.9	Pundamilia nyererei	303518	cellular organisms;Eukaryota;Opisthokonta;Metazoa;Eumetazoa;Bilateria;Deuterostomia;Chordata;Craniata;Vertebrata;Gnathostomata;Teleostomi;Euteleostomi;Actinopterygii;Actinopteri;Neopterygii;Teleostei;Osteoglossocephalai;Clupeocephala;Euteleosteomorpha;Neoteleostei;Eurypterygia;Ctenosquamata;Acanthomorphata;Euacanthomorphacea;Percomorphaceae;Ovalentaria;Cichlomorphae;Cichliformes;Cichlidae;African…
UniRef100_A0A3Q2VCA0	1	A0A3Q2VCA0	Zinc finger CCCH-type containing 6	1159	1-1059	3.2e-159	533.1	Haplochromis burtoni (Burton's mouthbrooder) (Chromis burtoni)	8153	cellular organisms;Eukaryota;Opisthokonta;Metazoa;Eumetazoa;Bilateria;Deuterostomia;Chordata;Craniata;Vertebrata;Gnathostomata;Teleostomi;Euteleostomi;Actinopterygii;Actinopteri;Neopterygii;Teleostei;Osteoglossocephalai;Clupeocephala;Euteleosteomorpha;Neoteleostei;Eurypterygia;Ctenosquamata;Acanthomorphata;Euacanthomorphacea;Percomorphaceae;Ovalentaria;Cichlomorphae;Cichliformes;Cichlidae;African…
UniRef100_A0A3P9BGI9	2	A0A3P9BGI9	Zinc finger CCCH-type containing 6	1159	1-1059	9.2e-159	531.6	Maylandia zebra (zebra mbuna)	319058	cellular organisms;Eukaryota;Opisthokonta;Metazoa;Eumetazoa;Bilateria;Deuterostomia;Chordata;Craniata;Vertebrata;Gnathostomata;Teleostomi;Euteleostomi;Actinopterygii;Actinopteri;Neopterygii;Teleostei;Osteoglossocephalai;Clupeocephala;Euteleosteomorpha;Neoteleostei;Eurypterygia;Ctenosquamata;Acanthomorphata;Euacanthomorphacea;Percomorphaceae;Ovalentaria;Cichlomorphae;Cichliformes;Cichlidae;African…
UniRef100_UPI000E41ED89	1	UPI000E41ED89	zinc finger CCCH domain-containing protein 6 isoform X1	1187	171-1087	3.7e-136	456.8	Astatotilapia calliptera (Eastern happy) (Chromis callipterus)	8154	cellular organisms;Eukaryota;Opisthokonta;Metazoa;Eumetazoa;Bilateria;Deuterostomia;Chordata;Craniata;Vertebrata;Gnathostomata;Teleostomi;Euteleostomi;Actinopterygii;Actinopteri;Neopterygii;Teleostei;Osteoglossocephalai;Clupeocephala;Euteleosteomorpha;Neoteleostei;Eurypterygia;Ctenosquamata;Acanthomorphata;Euacanthomorphacea;Percomorphaceae;Ovalentaria;Cichlomorphae;Cichliformes;Cichlidae;African…
UniRef100_UPI0003EBF0CA	1	UPI0003EBF0CA	zinc finger CCCH domain-containing protein 6-like	1159	1-1059	5.4e-154	515.8	Neolamprologus brichardi (Fairy cichlid) (Lamprologus brichardi)	32507	cellular organisms;Eukaryota;Opisthokonta;Metazoa;Eumetazoa;Bilateria;Deuterostomia;Chordata;Craniata;Vertebrata;Gnathostomata;Teleostomi;Euteleostomi;Actinopterygii;Actinopteri;Neopterygii;Teleostei;Osteoglossocephalai;Clupeocephala;Euteleosteomorpha;Neoteleostei;Eurypterygia;Ctenosquamata;Acanthomorphata;Euacanthomorphacea;Percomorphaceae;Ovalentaria;Cichlomorphae;Cichliformes;Cichlidae;African…
UniRef100_A0A3Q4HHN8	1	A0A3Q4HHN8	Zinc finger CCCH-type containing 6	966	140-914	3.8e-119	400.5	Neolamprologus brichardi (Fairy cichlid) (Lamprologus brichardi)	32507	cellular organisms;Eukaryota;Opisthokonta;Metazoa;Eumetazoa;Bilateria;Deuterostomia;Chordata;Craniata;Vertebrata;Gnathostomata;Teleostomi;Euteleostomi;Actinopterygii;Actinopteri;Neopterygii;Teleostei;Osteoglossocephalai;Clupeocephala;Euteleosteomorpha;Neoteleostei;Eurypterygia;Ctenosquamata;Acanthomorphata;Euacanthomorphacea;Percomorphaceae;Ovalentaria;Cichlomorphae;Cichliformes;Cichlidae;African…
UniRef100_I3JU71	1	I3JU71	Zinc finger CCCH-type containing 6	1169	1-1059	3.9e-154	516.3	Oreochromis niloticus (Nile tilapia) (Tilapia nilotica)	8128	cellular organisms;Eukaryota;Opisthokonta;Metazoa;Eumetazoa;Bilateria;Deuterostomia;Chordata;Craniata;Vertebrata;Gnathostomata;Teleostomi;Euteleostomi;Actinopterygii;Actinopteri;Neopterygii;Teleostei;Osteoglossocephalai;Clupeocephala;Euteleosteomorpha;Neoteleostei;Eurypterygia;Ctenosquamata;Acanthomorphata;Euacanthomorphacea;Percomorphaceae;Ovalentaria;Cichlomorphae;Cichliformes;Cichlidae;African…
UniRef100_I3JU72	1	I3JU72	Zinc finger CCCH-type containing 6	1119	3-1056	3.4e-153	513.2	Oreochromis niloticus (Nile tilapia) (Tilapia nilotica)	8128	cellular organisms;Eukaryota;Opisthokonta;Metazoa;Eumetazoa;Bilateria;Deuterostomia;Chordata;Craniata;Vertebrata;Gnathostomata;Teleostomi;Euteleostomi;Actinopterygii;Actinopteri;Neopterygii;Teleostei;Osteoglossocephalai;Clupeocephala;Euteleosteomorpha;Neoteleostei;Eurypterygia;Ctenosquamata;Acanthomorphata;Euacanthomorphacea;Percomorphaceae;Ovalentaria;Cichlomorphae;Cichliformes;Cichlidae;African…
UniRef100_UPI0012BC4B56	1	UPI0012BC4B56	zinc finger CCCH domain-containing protein 6	1161	1-1058	5.7e-154	515.7	Oreochromis aureus (Israeli tilapia) (Chromis aureus)	47969	cellular organisms;Eukaryota;Opisthokonta;Metazoa;Eumetazoa;Bilateria;Deuterostomia;Chordata;Craniata;Vertebrata;Gnathostomata;Teleostomi;Euteleostomi;Actinopterygii;Actinopteri;Neopterygii;Teleostei;Osteoglossocephalai;Clupeocephala;Euteleosteomorpha;Neoteleostei;Eurypterygia;Ctenosquamata;Acanthomorphata;Euacanthomorphacea;Percomorphaceae;Ovalentaria;Cichlomorphae;Cichliformes;Cichlidae;African…
UniRef100_UPI0011E9E252	1	UPI0011E9E252	zinc finger CCCH domain-containing protein 6	1155	1-1066	6.8e-152	508.9	Archocentrus centrarchus (Flier cichlid) (Cichlasoma centrarchus)	63155	cellular organisms;Eukaryota;Opisthokonta;Metazoa;Eumetazoa;Bilateria;Deuterostomia;Chordata;Craniata;Vertebrata;Gnathostomata;Teleostomi;Euteleostomi;Actinopterygii;Actinopteri;Neopterygii;Teleostei;Osteoglossocephalai;Clupeocephala;Euteleosteomorpha;Neoteleostei;Eurypterygia;Ctenosquamata;Acanthomorphata;Euacanthomorphacea;Percomorphaceae;Ovalentaria;Cichlomorphae;Cichliformes;Cichlidae;New Wor…
UniRef100_A0A3Q0SZS4	1	A0A3Q0SZS4	Zinc finger CCCH-type containing 6	1019	142-923	8.5e-118	396.1	Amphilophus citrinellus (Midas cichlid) (Cichlasoma citrinellum)	61819	cellular organisms;Eukaryota;Opisthokonta;Metazoa;Eumetazoa;Bilateria;Deuterostomia;Chordata;Craniata;Vertebrata;Gnathostomata;Teleostomi;Euteleostomi;Actinopterygii;Actinopteri;Neopterygii;Teleostei;Osteoglossocephalai;Clupeocephala;Euteleosteomorpha;Neoteleostei;Eurypterygia;Ctenosquamata;Acanthomorphata;Euacanthomorphacea;Percomorphaceae;Ovalentaria;Cichlomorphae;Cichliformes;Cichlidae;New Wor…
UniRef100_UPI0010422138	1	UPI0010422138	zinc finger CCCH domain-containing protein 6 isoform X1	1161	1-1063	9e-155	518.4	Parambassis ranga (Indian glassy fish)	210632	cellular organisms;Eukaryota;Opisthokonta;Metazoa;Eumetazoa;Bilateria;Deuterostomia;Chordata;Craniata;Vertebrata;Gnathostomata;Teleostomi;Euteleostomi;Actinopterygii;Actinopteri;Neopterygii;Teleostei;Osteoglossocephalai;Clupeocephala;Euteleosteomorpha;Neoteleostei;Eurypterygia;Ctenosquamata;Acanthomorphata;Euacanthomorphacea;Percomorphaceae;Ovalentaria;Ovalentaria incertae sedis;Ambassidae;Paramb…
UniRef100_UPI001041E6A5	1	UPI001041E6A5	zinc finger CCCH domain-containing protein 6 isoform X2	1149	18-1051	6.1e-154	515.7	Parambassis ranga (Indian glassy fish)	210632	cellular organisms;Eukaryota;Opisthokonta;Metazoa;Eumetazoa;Bilateria;Deuterostomia;Chordata;Craniata;Vertebrata;Gnathostomata;Teleostomi;Euteleostomi;Actinopterygii;Actinopteri;Neopterygii;Teleostei;Osteoglossocephalai;Clupeocephala;Euteleosteomorpha;Neoteleostei;Eurypterygia;Ctenosquamata;Acanthomorphata;Euacanthomorphacea;Percomorphaceae;Ovalentaria;Ovalentaria incertae sedis;Ambassidae;Paramb…
UniRef100_A0A3Q1EBG9	1	A0A3Q1EBG9	Zinc finger CCCH-type containing 6	1162	1-1063	3.5e-145	486.7	Acanthochromis polyacanthus (spiny chromis)	80966	cellular organisms;Eukaryota;Opisthokonta;Metazoa;Eumetazoa;Bilateria;Deuterostomia;Chordata;Craniata;Vertebrata;Gnathostomata;Teleostomi;Euteleostomi;Actinopterygii;Actinopteri;Neopterygii;Teleostei;Osteoglossocephalai;Clupeocephala;Euteleosteomorpha;Neoteleostei;Eurypterygia;Ctenosquamata;Acanthomorphata;Euacanthomorphacea;Percomorphaceae;Ovalentaria;Ovalentaria incertae sedis;Pomacentridae;Aca…
UniRef100_A0A3P8T8K5	1	A0A3P8T8K5	Zinc finger CCCH-type containing 6	1163	1-1034	8.9e-144	482.0	Amphiprion percula (Orange clownfish) (Lutjanus percula)	161767	cellular organisms;Eukaryota;Opisthokonta;Metazoa;Eumetazoa;Bilateria;Deuterostomia;Chordata;Craniata;Vertebrata;Gnathostomata;Teleostomi;Euteleostomi;Actinopterygii;Actinopteri;Neopterygii;Teleostei;Osteoglossocephalai;Clupeocephala;Euteleosteomorpha;Neoteleostei;Eurypterygia;Ctenosquamata;Acanthomorphata;Euacanthomorphacea;Percomorphaceae;Ovalentaria;Ovalentaria incertae sedis;Pomacentridae;Amp…
UniRef100_A0A3Q1AJ69	1	A0A3Q1AJ69	Zinc finger CCCH-type containing 6	1162	1-1033	4.3e-142	476.5	Amphiprion ocellaris (Clown anemonefish)	80972	cellular organisms;Eukaryota;Opisthokonta;Metazoa;Eumetazoa;Bilateria;Deuterostomia;Chordata;Craniata;Vertebrata;Gnathostomata;Teleostomi;Euteleostomi;Actinopterygii;Actinopteri;Neopterygii;Teleostei;Osteoglossocephalai;Clupeocephala;Euteleosteomorpha;Neoteleostei;Eurypterygia;Ctenosquamata;Acanthomorphata;Euacanthomorphacea;Percomorphaceae;Ovalentaria;Ovalentaria incertae sedis;Pomacentridae;Amp…
UniRef100_UPI0004982F0F	1	UPI0004982F0F	zinc finger CCCH domain-containing protein 6-like	1178	1-1056	3.1e-144	483.6	Stegastes partitus (bicolor damselfish)	144197	cellular organisms;Eukaryota;Opisthokonta;Metazoa;Eumetazoa;Bilateria;Deuterostomia;Chordata;Craniata;Vertebrata;Gnathostomata;Teleostomi;Euteleostomi;Actinopterygii;Actinopteri;Neopterygii;Teleostei;Osteoglossocephalai;Clupeocephala;Euteleosteomorpha;Neoteleostei;Eurypterygia;Ctenosquamata;Acanthomorphata;Euacanthomorphacea;Percomorphaceae;Ovalentaria;Ovalentaria incertae sedis;Pomacentridae;Ste…
UniRef100_A0A3B5B458	1	A0A3B5B458	Zinc finger CCCH-type containing 6	944	131-877	4.4e-102	344.1	Stegastes partitus (bicolor damselfish)	144197	cellular organisms;Eukaryota;Opisthokonta;Metazoa;Eumetazoa;Bilateria;Deuterostomia;Chordata;Craniata;Vertebrata;Gnathostomata;Teleostomi;Euteleostomi;Actinopterygii;Actinopteri;Neopterygii;Teleostei;Osteoglossocephalai;Clupeocephala;Euteleosteomorpha;Neoteleostei;Eurypterygia;Ctenosquamata;Acanthomorphata;Euacanthomorphacea;Percomorphaceae;Ovalentaria;Ovalentaria incertae sedis;Pomacentridae;Ste…
UniRef100_UPI0010F716FC	1	UPI0010F716FC	zinc finger CCCH domain-containing protein 6 isoform X1	1143	1-1054	8.6e-153	511.8	Betta splendens (Siamese fighting fish)	158456	cellular organisms;Eukaryota;Opisthokonta;Metazoa;Eumetazoa;Bilateria;Deuterostomia;Chordata;Craniata;Vertebrata;Gnathostomata;Teleostomi;Euteleostomi;Actinopterygii;Actinopteri;Neopterygii;Teleostei;Osteoglossocephalai;Clupeocephala;Euteleosteomorpha;Neoteleostei;Eurypterygia;Ctenosquamata;Acanthomorphata;Euacanthomorphacea;Percomorphaceae;Anabantaria;Anabantiformes;Anabantoidei;Osphronemidae;Ma…
UniRef100_UPI0010F9894A	1	UPI0010F9894A	zinc finger CCCH domain-containing protein 6 isoform X2	1131	18-1042	7.2e-151	505.5	Betta splendens (Siamese fighting fish)	158456	cellular organisms;Eukaryota;Opisthokonta;Metazoa;Eumetazoa;Bilateria;Deuterostomia;Chordata;Craniata;Vertebrata;Gnathostomata;Teleostomi;Euteleostomi;Actinopterygii;Actinopteri;Neopterygii;Teleostei;Osteoglossocephalai;Clupeocephala;Euteleosteomorpha;Neoteleostei;Eurypterygia;Ctenosquamata;Acanthomorphata;Euacanthomorphacea;Percomorphaceae;Anabantaria;Anabantiformes;Anabantoidei;Osphronemidae;Ma…
UniRef100_A0A3Q1J8T5	1	A0A3Q1J8T5	Zinc finger CCCH-type containing 6	1165	1-1075	3.7e-151	506.4	Anabas testudineus (Climbing perch) (Anthias testudineus)	64144	cellular organisms;Eukaryota;Opisthokonta;Metazoa;Eumetazoa;Bilateria;Deuterostomia;Chordata;Craniata;Vertebrata;Gnathostomata;Teleostomi;Euteleostomi;Actinopterygii;Actinopteri;Neopterygii;Teleostei;Osteoglossocephalai;Clupeocephala;Euteleosteomorpha;Neoteleostei;Eurypterygia;Ctenosquamata;Acanthomorphata;Euacanthomorphacea;Percomorphaceae;Anabantaria;Anabantiformes;Anabantoidei;Anabantidae;Anab…
UniRef100_UPI000E4616CC	1	UPI000E4616CC	zinc finger CCCH domain-containing protein 6 isoform X2	1153	18-1063	2.4e-150	503.7	Anabas testudineus (Climbing perch) (Anthias testudineus)	64144	cellular organisms;Eukaryota;Opisthokonta;Metazoa;Eumetazoa;Bilateria;Deuterostomia;Chordata;Craniata;Vertebrata;Gnathostomata;Teleostomi;Euteleostomi;Actinopterygii;Actinopteri;Neopterygii;Teleostei;Osteoglossocephalai;Clupeocephala;Euteleosteomorpha;Neoteleostei;Eurypterygia;Ctenosquamata;Acanthomorphata;Euacanthomorphacea;Percomorphaceae;Anabantaria;Anabantiformes;Anabantoidei;Anabantidae;Anab…
UniRef100_A0A3Q3NH84	1	A0A3Q3NH84	Zinc finger CCCH-type containing 6	1167	1-1077	1.5e-146	491.2	Mastacembelus armatus (zig-zag eel)	205130	cellular organisms;Eukaryota;Opisthokonta;Metazoa;Eumetazoa;Bilateria;Deuterostomia;Chordata;Craniata;Vertebrata;Gnathostomata;Teleostomi;Euteleostomi;Actinopterygii;Actinopteri;Neopterygii;Teleostei;Osteoglossocephalai;Clupeocephala;Euteleosteomorpha;Neoteleostei;Eurypterygia;Ctenosquamata;Acanthomorphata;Euacanthomorphacea;Percomorphaceae;Anabantaria;Synbranchiformes;Mastacembeloidei;Mastacembe…
UniRef100_UPI000E459C57	1	UPI000E459C57	zinc finger CCCH domain-containing protein 6 isoform X2	1155	18-1065	1.3e-144	484.8	Mastacembelus armatus (zig-zag eel)	205130	cellular organisms;Eukaryota;Opisthokonta;Metazoa;Eumetazoa;Bilateria;Deuterostomia;Chordata;Craniata;Vertebrata;Gnathostomata;Teleostomi;Euteleostomi;Actinopterygii;Actinopteri;Neopterygii;Teleostei;Osteoglossocephalai;Clupeocephala;Euteleosteomorpha;Neoteleostei;Eurypterygia;Ctenosquamata;Acanthomorphata;Euacanthomorphacea;Percomorphaceae;Anabantaria;Synbranchiformes;Mastacembeloidei;Mastacembe…
UniRef100_UPI0009B3A735	1	UPI0009B3A735	zinc finger CCCH domain-containing protein 6	1171	1-1046	1.6e-144	484.5	Monopterus albus (Swamp eel)	43700	cellular organisms;Eukaryota;Opisthokonta;Metazoa;Eumetazoa;Bilateria;Deuterostomia;Chordata;Craniata;Vertebrata;Gnathostomata;Teleostomi;Euteleostomi;Actinopterygii;Actinopteri;Neopterygii;Teleostei;Osteoglossocephalai;Clupeocephala;Euteleosteomorpha;Neoteleostei;Eurypterygia;Ctenosquamata;Acanthomorphata;Euacanthomorphacea;Percomorphaceae;Anabantaria;Synbranchiformes;Synbranchoidei;Synbranchida…
UniRef100_A0A3Q3Q267	1	A0A3Q3Q267	Zinc finger CCCH-type containing 6	1001	145-876	5e-108	363.8	Monopterus albus (Swamp eel)	43700	cellular organisms;Eukaryota;Opisthokonta;Metazoa;Eumetazoa;Bilateria;Deuterostomia;Chordata;Craniata;Vertebrata;Gnathostomata;Teleostomi;Euteleostomi;Actinopterygii;Actinopteri;Neopterygii;Teleostei;Osteoglossocephalai;Clupeocephala;Euteleosteomorpha;Neoteleostei;Eurypterygia;Ctenosquamata;Acanthomorphata;Euacanthomorphacea;Percomorphaceae;Anabantaria;Synbranchiformes;Synbranchoidei;Synbranchida…
UniRef100_UPI001113AD46	1	UPI001113AD46	zinc finger CCCH domain-containing protein 6 isoform X3	1182	14-1045	1.7e-151	507.6	Echeneis naucrates (Live sharksucker)	173247	cellular organisms;Eukaryota;Opisthokonta;Metazoa;Eumetazoa;Bilateria;Deuterostomia;Chordata;Craniata;Vertebrata;Gnathostomata;Teleostomi;Euteleostomi;Actinopterygii;Actinopteri;Neopterygii;Teleostei;Osteoglossocephalai;Clupeocephala;Euteleosteomorpha;Neoteleostei;Eurypterygia;Ctenosquamata;Acanthomorphata;Euacanthomorphacea;Percomorphaceae;Carangaria;Carangiformes;Echeneidae;Echeneis;Echeneis na…
UniRef100_UPI00111414C1	1	UPI00111414C1	zinc finger CCCH domain-containing protein 6 isoform X2	1186	18-1049	3.3e-151	506.6	Echeneis naucrates (Live sharksucker)	173247	cellular organisms;Eukaryota;Opisthokonta;Metazoa;Eumetazoa;Bilateria;Deuterostomia;Chordata;Craniata;Vertebrata;Gnathostomata;Teleostomi;Euteleostomi;Actinopterygii;Actinopteri;Neopterygii;Teleostei;Osteoglossocephalai;Clupeocephala;Euteleosteomorpha;Neoteleostei;Eurypterygia;Ctenosquamata;Acanthomorphata;Euacanthomorphacea;Percomorphaceae;Carangaria;Carangiformes;Echeneidae;Echeneis;Echeneis na…
UniRef100_UPI001113E647	1	UPI001113E647	zinc finger CCCH domain-containing protein 6 isoform X1	1198	1-1061	1.8e-151	507.5	Echeneis naucrates (Live sharksucker)	173247	cellular organisms;Eukaryota;Opisthokonta;Metazoa;Eumetazoa;Bilateria;Deuterostomia;Chordata;Craniata;Vertebrata;Gnathostomata;Teleostomi;Euteleostomi;Actinopterygii;Actinopteri;Neopterygii;Teleostei;Osteoglossocephalai;Clupeocephala;Euteleosteomorpha;Neoteleostei;Eurypterygia;Ctenosquamata;Acanthomorphata;Euacanthomorphacea;Percomorphaceae;Carangaria;Carangiformes;Echeneidae;Echeneis;Echeneis na…
UniRef100_A0A3B4YZE6	1	A0A3B4YZE6	Zinc finger CCCH-type containing 6	1168	1-1070	5.4e-151	505.9	Seriola lalandi dorsalis	1841481	cellular organisms;Eukaryota;Opisthokonta;Metazoa;Eumetazoa;Bilateria;Deuterostomia;Chordata;Craniata;Vertebrata;Gnathostomata;Teleostomi;Euteleostomi;Actinopterygii;Actinopteri;Neopterygii;Teleostei;Osteoglossocephalai;Clupeocephala;Euteleosteomorpha;Neoteleostei;Eurypterygia;Ctenosquamata;Acanthomorphata;Euacanthomorphacea;Percomorphaceae;Carangaria;Carangiformes;Carangidae;Seriola;Seriola lala…
UniRef100_A0A3B4TPZ1	1	A0A3B4TPZ1	Zinc finger CCCH-type containing 6	1170	1-1070	2.4e-150	503.7	Seriola dumerili (Greater amberjack) (Caranx dumerili)	41447	cellular organisms;Eukaryota;Opisthokonta;Metazoa;Eumetazoa;Bilateria;Deuterostomia;Chordata;Craniata;Vertebrata;Gnathostomata;Teleostomi;Euteleostomi;Actinopterygii;Actinopteri;Neopterygii;Teleostei;Osteoglossocephalai;Clupeocephala;Euteleosteomorpha;Neoteleostei;Eurypterygia;Ctenosquamata;Acanthomorphata;Euacanthomorphacea;Percomorphaceae;Carangaria;Carangiformes;Carangidae;Seriola;Seriola dume…
UniRef100_A0A2U9CH26	1	A0A2U9CH26	Putative zinc finger CCCH domain-containing protein 6-like	1125	1-1025	1.8e-115	388.4	Scophthalmus maximus (Turbot) (Psetta maxima)	52904	cellular organisms;Eukaryota;Opisthokonta;Metazoa;Eumetazoa;Bilateria;Deuterostomia;Chordata;Craniata;Vertebrata;Gnathostomata;Teleostomi;Euteleostomi;Actinopterygii;Actinopteri;Neopterygii;Teleostei;Osteoglossocephalai;Clupeocephala;Euteleosteomorpha;Neoteleostei;Eurypterygia;Ctenosquamata;Acanthomorphata;Euacanthomorphacea;Percomorphaceae;Carangaria;Pleuronectiformes;Pleuronectoidei;Scophthalmi…
UniRef100_A0A4W6F1Q3	1	A0A4W6F1Q3	Uncharacterized protein	1162	1-1063	1.5e-148	497.8	Lates calcarifer (Barramundi) (Holocentrus calcarifer)	8187	cellular organisms;Eukaryota;Opisthokonta;Metazoa;Eumetazoa;Bilateria;Deuterostomia;Chordata;Craniata;Vertebrata;Gnathostomata;Teleostomi;Euteleostomi;Actinopterygii;Actinopteri;Neopterygii;Teleostei;Osteoglossocephalai;Clupeocephala;Euteleosteomorpha;Neoteleostei;Eurypterygia;Ctenosquamata;Acanthomorphata;Euacanthomorphacea;Percomorphaceae;Carangaria;Carangaria incertae sedis;Centropomidae;Lates…
UniRef100_UPI000873B384	1	UPI000873B384	zinc finger CCCH domain-containing protein 6 isoform X3	1161	1-1063	6.8e-148	495.6	Lates calcarifer (Barramundi) (Holocentrus calcarifer)	8187	cellular organisms;Eukaryota;Opisthokonta;Metazoa;Eumetazoa;Bilateria;Deuterostomia;Chordata;Craniata;Vertebrata;Gnathostomata;Teleostomi;Euteleostomi;Actinopterygii;Actinopteri;Neopterygii;Teleostei;Osteoglossocephalai;Clupeocephala;Euteleosteomorpha;Neoteleostei;Eurypterygia;Ctenosquamata;Acanthomorphata;Euacanthomorphacea;Percomorphaceae;Carangaria;Carangaria incertae sedis;Centropomidae;Lates…
UniRef100_UPI0008735EDC	1	UPI0008735EDC	zinc finger CCCH domain-containing protein 6 isoform X2	1161	1-1062	5.4e-148	496.0	Lates calcarifer (Barramundi) (Holocentrus calcarifer)	8187	cellular organisms;Eukaryota;Opisthokonta;Metazoa;Eumetazoa;Bilateria;Deuterostomia;Chordata;Craniata;Vertebrata;Gnathostomata;Teleostomi;Euteleostomi;Actinopterygii;Actinopteri;Neopterygii;Teleostei;Osteoglossocephalai;Clupeocephala;Euteleosteomorpha;Neoteleostei;Eurypterygia;Ctenosquamata;Acanthomorphata;Euacanthomorphacea;Percomorphaceae;Carangaria;Carangaria incertae sedis;Centropomidae;Lates…
UniRef100_UPI00097DACBC	1	UPI00097DACBC	zinc finger CCCH domain-containing protein 6	1150	1-1043	3.9e-139	466.7	Paralichthys olivaceus (Bastard halibut) (Hippoglossus olivaceus)	8255	cellular organisms;Eukaryota;Opisthokonta;Metazoa;Eumetazoa;Bilateria;Deuterostomia;Chordata;Craniata;Vertebrata;Gnathostomata;Teleostomi;Euteleostomi;Actinopterygii;Actinopteri;Neopterygii;Teleostei;Osteoglossocephalai;Clupeocephala;Euteleosteomorpha;Neoteleostei;Eurypterygia;Ctenosquamata;Acanthomorphata;Euacanthomorphacea;Percomorphaceae;Carangaria;Pleuronectiformes;Pleuronectoidei;Paralichthy…
UniRef100_UPI000A1C7495	1	UPI000A1C7495	zinc finger CCCH domain-containing protein 6	1103	1-1006	1.1e-150	504.9	Boleophthalmus pectinirostris (Great blue-spotted mudskipper) (Gobius pectinirostris)	150288	cellular organisms;Eukaryota;Opisthokonta;Metazoa;Eumetazoa;Bilateria;Deuterostomia;Chordata;Craniata;Vertebrata;Gnathostomata;Teleostomi;Euteleostomi;Actinopterygii;Actinopteri;Neopterygii;Teleostei;Osteoglossocephalai;Clupeocephala;Euteleosteomorpha;Neoteleostei;Eurypterygia;Ctenosquamata;Acanthomorphata;Euacanthomorphacea;Percomorphaceae;Gobiaria;Gobiiformes;Gobioidei;Gobiidae;Oxudercinae;Bole…
UniRef100_UPI001180D7F7	1	UPI001180D7F7	zinc finger CCCH domain-containing protein 6 isoform X1	1159	1-619	7.8e-101	340.0	Sphaeramia orbicularis (orbiculate cardinalfish)	375764	cellular organisms;Eukaryota;Opisthokonta;Metazoa;Eumetazoa;Bilateria;Deuterostomia;Chordata;Craniata;Vertebrata;Gnathostomata;Teleostomi;Euteleostomi;Actinopterygii;Actinopteri;Neopterygii;Teleostei;Osteoglossocephalai;Clupeocephala;Euteleosteomorpha;Neoteleostei;Eurypterygia;Ctenosquamata;Acanthomorphata;Euacanthomorphacea;Percomorphaceae;Gobiaria;Kurtiformes;Apogonoidei;Apogonidae;Apogoninae;S…
UniRef100_UPI00117C6226	1	UPI00117C6226	zinc finger CCCH domain-containing protein 6 isoform X2	1147	18-1050	1.7e-140	471.2	Sphaeramia orbicularis (orbiculate cardinalfish)	375764	cellular organisms;Eukaryota;Opisthokonta;Metazoa;Eumetazoa;Bilateria;Deuterostomia;Chordata;Craniata;Vertebrata;Gnathostomata;Teleostomi;Euteleostomi;Actinopterygii;Actinopteri;Neopterygii;Teleostei;Osteoglossocephalai;Clupeocephala;Euteleosteomorpha;Neoteleostei;Eurypterygia;Ctenosquamata;Acanthomorphata;Euacanthomorphacea;Percomorphaceae;Gobiaria;Kurtiformes;Apogonoidei;Apogonidae;Apogoninae;S…
UniRef100_UPI00094EEDF9	1	UPI00094EEDF9	zinc finger CCCH domain-containing protein 6 isoform X1	1134	2-1032	2.5e-138	464.0	Hippocampus comes (Tiger tail seahorse)	109280	cellular organisms;Eukaryota;Opisthokonta;Metazoa;Eumetazoa;Bilateria;Deuterostomia;Chordata;Craniata;Vertebrata;Gnathostomata;Teleostomi;Euteleostomi;Actinopterygii;Actinopteri;Neopterygii;Teleostei;Osteoglossocephalai;Clupeocephala;Euteleosteomorpha;Neoteleostei;Eurypterygia;Ctenosquamata;Acanthomorphata;Euacanthomorphacea;Percomorphaceae;Syngnathiaria;Syngnathiformes;Syngnathoidei;Syngnathidae…
UniRef100_UPI00094EC002	1	UPI00094EC002	zinc finger CCCH domain-containing protein 6 isoform X2	1122	13-1020	4.2e-137	459.9	Hippocampus comes (Tiger tail seahorse)	109280	cellular organisms;Eukaryota;Opisthokonta;Metazoa;Eumetazoa;Bilateria;Deuterostomia;Chordata;Craniata;Vertebrata;Gnathostomata;Teleostomi;Euteleostomi;Actinopterygii;Actinopteri;Neopterygii;Teleostei;Osteoglossocephalai;Clupeocephala;Euteleosteomorpha;Neoteleostei;Eurypterygia;Ctenosquamata;Acanthomorphata;Euacanthomorphacea;Percomorphaceae;Syngnathiaria;Syngnathiformes;Syngnathoidei;Syngnathidae…
UniRef100_A0A3Q2XY16	1	A0A3Q2XY16	Zinc finger CCCH-type containing 6	1099	13-997	5.6e-135	452.9	Hippocampus comes (Tiger tail seahorse)	109280	cellular organisms;Eukaryota;Opisthokonta;Metazoa;Eumetazoa;Bilateria;Deuterostomia;Chordata;Craniata;Vertebrata;Gnathostomata;Teleostomi;Euteleostomi;Actinopterygii;Actinopteri;Neopterygii;Teleostei;Osteoglossocephalai;Clupeocephala;Euteleosteomorpha;Neoteleostei;Eurypterygia;Ctenosquamata;Acanthomorphata;Euacanthomorphacea;Percomorphaceae;Syngnathiaria;Syngnathiformes;Syngnathoidei;Syngnathidae…
UniRef100_UPI00054CF095	1	UPI00054CF095	zinc finger CCCH domain-containing protein 6 isoform X1	1148	2-1058	6e-150	502.4	Notothenia coriiceps (black rockcod)	8208	cellular organisms;Eukaryota;Opisthokonta;Metazoa;Eumetazoa;Bilateria;Deuterostomia;Chordata;Craniata;Vertebrata;Gnathostomata;Teleostomi;Euteleostomi;Actinopterygii;Actinopteri;Neopterygii;Teleostei;Osteoglossocephalai;Clupeocephala;Euteleosteomorpha;Neoteleostei;Eurypterygia;Ctenosquamata;Acanthomorphata;Euacanthomorphacea;Percomorphaceae;Eupercaria;Perciformes;Notothenioidei;Nototheniidae;Noto…
UniRef100_UPI0005592F42	1	UPI0005592F42	zinc finger CCCH domain-containing protein 6 isoform X2	1136	18-1046	1.1e-148	498.3	Notothenia coriiceps (black rockcod)	8208	cellular organisms;Eukaryota;Opisthokonta;Metazoa;Eumetazoa;Bilateria;Deuterostomia;Chordata;Craniata;Vertebrata;Gnathostomata;Teleostomi;Euteleostomi;Actinopterygii;Actinopteri;Neopterygii;Teleostei;Osteoglossocephalai;Clupeocephala;Euteleosteomorpha;Neoteleostei;Eurypterygia;Ctenosquamata;Acanthomorphata;Euacanthomorphacea;Percomorphaceae;Eupercaria;Perciformes;Notothenioidei;Nototheniidae;Noto…
UniRef100_UPI00110E4EDF	1	UPI00110E4EDF	LOW QUALITY PROTEIN: zinc finger CCCH domain-containing protein 6-like	1162	1-1033	1.4e-138	464.8	Cottoperca gobio (Frogmouth) (Aphritis gobio)	56716	cellular organisms;Eukaryota;Opisthokonta;Metazoa;Eumetazoa;Bilateria;Deuterostomia;Chordata;Craniata;Vertebrata;Gnathostomata;Teleostomi;Euteleostomi;Actinopterygii;Actinopteri;Neopterygii;Teleostei;Osteoglossocephalai;Clupeocephala;Euteleosteomorpha;Neoteleostei;Eurypterygia;Ctenosquamata;Acanthomorphata;Euacanthomorphacea;Percomorphaceae;Eupercaria;Perciformes;Notothenioidei;Bovichtidae;Cottop…
UniRef100_UPI0012EE87E4	1	UPI0012EE87E4	zinc finger CCCH domain-containing protein 6 isoform X1	1162	1-1065	2.7e-140	470.5	Anarrhichthys ocellatus (wolf-eel)	433405	cellular organisms;Eukaryota;Opisthokonta;Metazoa;Eumetazoa;Bilateria;Deuterostomia;Chordata;Craniata;Vertebrata;Gnathostomata;Teleostomi;Euteleostomi;Actinopterygii;Actinopteri;Neopterygii;Teleostei;Osteoglossocephalai;Clupeocephala;Euteleosteomorpha;Neoteleostei;Eurypterygia;Ctenosquamata;Acanthomorphata;Euacanthomorphacea;Percomorphaceae;Eupercaria;Perciformes;Cottioidei;Zoarcales;Anarhichadid…
UniRef100_UPI0012EDA60B	1	UPI0012EDA60B	zinc finger CCCH domain-containing protein 6 isoform X2	1161	1-1064	2.8e-140	470.5	Anarrhichthys ocellatus (wolf-eel)	433405	cellular organisms;Eukaryota;Opisthokonta;Metazoa;Eumetazoa;Bilateria;Deuterostomia;Chordata;Craniata;Vertebrata;Gnathostomata;Teleostomi;Euteleostomi;Actinopterygii;Actinopteri;Neopterygii;Teleostei;Osteoglossocephalai;Clupeocephala;Euteleosteomorpha;Neoteleostei;Eurypterygia;Ctenosquamata;Acanthomorphata;Euacanthomorphacea;Percomorphaceae;Eupercaria;Perciformes;Cottioidei;Zoarcales;Anarhichadid…
UniRef100_G3NP02	1	G3NP02	Zinc finger CCCH-type containing 6	1091	5-1025	9.2e-128	429.0	Gasterosteus aculeatus (Three-spined stickleback)	69293	cellular organisms;Eukaryota;Opisthokonta;Metazoa;Eumetazoa;Bilateria;Deuterostomia;Chordata;Craniata;Vertebrata;Gnathostomata;Teleostomi;Euteleostomi;Actinopterygii;Actinopteri;Neopterygii;Teleostei;Osteoglossocephalai;Clupeocephala;Euteleosteomorpha;Neoteleostei;Eurypterygia;Ctenosquamata;Acanthomorphata;Euacanthomorphacea;Percomorphaceae;Eupercaria;Perciformes;Cottioidei;Gasterosteales;Gastero…
UniRef100_A0A5J5CUB7	1	A0A5J5CUB7	Uncharacterized protein	1152	1-1055	1.4e-143	481.4	Etheostoma spectabile (orangethroat darter)	54343	cellular organisms;Eukaryota;Opisthokonta;Metazoa;Eumetazoa;Bilateria;Deuterostomia;Chordata;Craniata;Vertebrata;Gnathostomata;Teleostomi;Euteleostomi;Actinopterygii;Actinopteri;Neopterygii;Teleostei;Osteoglossocephalai;Clupeocephala;Euteleosteomorpha;Neoteleostei;Eurypterygia;Ctenosquamata;Acanthomorphata;Euacanthomorphacea;Percomorphaceae;Eupercaria;Perciformes;Percoidei;Percidae;Etheostomatina…
UniRef100_UPI00106E1B4B	1	UPI00106E1B4B	zinc finger CCCH domain-containing protein 6	1166	1-1067	3.1e-143	480.2	Perca flavescens (American yellow perch) (Morone flavescens)	8167	cellular organisms;Eukaryota;Opisthokonta;Metazoa;Eumetazoa;Bilateria;Deuterostomia;Chordata;Craniata;Vertebrata;Gnathostomata;Teleostomi;Euteleostomi;Actinopterygii;Actinopteri;Neopterygii;Teleostei;Osteoglossocephalai;Clupeocephala;Euteleosteomorpha;Neoteleostei;Eurypterygia;Ctenosquamata;Acanthomorphata;Euacanthomorphacea;Percomorphaceae;Eupercaria;Perciformes;Percoidei;Percidae;Percinae;Perca…
UniRef100_A0A484CGN2	1	A0A484CGN2	C3H1-type domain-containing protein	1131	1-1032	2.9e-102	344.7	Perca flavescens (American yellow perch) (Morone flavescens)	8167	cellular organisms;Eukaryota;Opisthokonta;Metazoa;Eumetazoa;Bilateria;Deuterostomia;Chordata;Craniata;Vertebrata;Gnathostomata;Teleostomi;Euteleostomi;Actinopterygii;Actinopteri;Neopterygii;Teleostei;Osteoglossocephalai;Clupeocephala;Euteleosteomorpha;Neoteleostei;Eurypterygia;Ctenosquamata;Acanthomorphata;Euacanthomorphacea;Percomorphaceae;Eupercaria;Perciformes;Percoidei;Percidae;Percinae;Perca…
UniRef100_UPI00125E2460	1	UPI00125E2460	LOW QUALITY PROTEIN: zinc finger CCCH domain-containing protein 6-like	1168	1-1069	2e-140	471.0	Sander lucioperca (Pike-perch) (Perca lucioperca)	283035	cellular organisms;Eukaryota;Opisthokonta;Metazoa;Eumetazoa;Bilateria;Deuterostomia;Chordata;Craniata;Vertebrata;Gnathostomata;Teleostomi;Euteleostomi;Actinopterygii;Actinopteri;Neopterygii;Teleostei;Osteoglossocephalai;Clupeocephala;Euteleosteomorpha;Neoteleostei;Eurypterygia;Ctenosquamata;Acanthomorphata;Euacanthomorphacea;Percomorphaceae;Eupercaria;Perciformes;Percoidei;Percidae;Luciopercinae;…
UniRef100_A0A0F8AJI2	1	A0A0F8AJI2	Zinc finger CCCH domain-containing protein 6	1158	1-1060	1.4e-146	491.3	Larimichthys crocea (Large yellow croaker) (Pseudosciaena crocea)	215358	cellular organisms;Eukaryota;Opisthokonta;Metazoa;Eumetazoa;Bilateria;Deuterostomia;Chordata;Craniata;Vertebrata;Gnathostomata;Teleostomi;Euteleostomi;Actinopterygii;Actinopteri;Neopterygii;Teleostei;Osteoglossocephalai;Clupeocephala;Euteleosteomorpha;Neoteleostei;Eurypterygia;Ctenosquamata;Acanthomorphata;Euacanthomorphacea;Percomorphaceae;Eupercaria;Eupercaria incertae sedis;Sciaenidae;Larimich…
UniRef100_UPI000F5E4A82	1	UPI000F5E4A82	zinc finger CCCH domain-containing protein 6	1158	1-1060	1.7e-146	491.0	Larimichthys crocea (Large yellow croaker) (Pseudosciaena crocea)	215358	cellular organisms;Eukaryota;Opisthokonta;Metazoa;Eumetazoa;Bilateria;Deuterostomia;Chordata;Craniata;Vertebrata;Gnathostomata;Teleostomi;Euteleostomi;Actinopterygii;Actinopteri;Neopterygii;Teleostei;Osteoglossocephalai;Clupeocephala;Euteleosteomorpha;Neoteleostei;Eurypterygia;Ctenosquamata;Acanthomorphata;Euacanthomorphacea;Percomorphaceae;Eupercaria;Eupercaria incertae sedis;Sciaenidae;Larimich…
UniRef100_UPI0010FAEF40	1	UPI0010FAEF40	zinc finger CCCH domain-containing protein 6	1162	1-1067	1.3e-145	488.1	Labrus bergylta (ballan wrasse)	56723	cellular organisms;Eukaryota;Opisthokonta;Metazoa;Eumetazoa;Bilateria;Deuterostomia;Chordata;Craniata;Vertebrata;Gnathostomata;Teleostomi;Euteleostomi;Actinopterygii;Actinopteri;Neopterygii;Teleostei;Osteoglossocephalai;Clupeocephala;Euteleosteomorpha;Neoteleostei;Eurypterygia;Ctenosquamata;Acanthomorphata;Euacanthomorphacea;Percomorphaceae;Eupercaria;Labriformes;Labridae;Labrus;Labrus bergylta
UniRef100_A0A3Q3EA89	1	A0A3Q3EA89	Zinc finger CCCH-type containing 6	963	130-909	1.2e-106	359.2	Labrus bergylta (ballan wrasse)	56723	cellular organisms;Eukaryota;Opisthokonta;Metazoa;Eumetazoa;Bilateria;Deuterostomia;Chordata;Craniata;Vertebrata;Gnathostomata;Teleostomi;Euteleostomi;Actinopterygii;Actinopteri;Neopterygii;Teleostei;Osteoglossocephalai;Clupeocephala;Euteleosteomorpha;Neoteleostei;Eurypterygia;Ctenosquamata;Acanthomorphata;Euacanthomorphacea;Percomorphaceae;Eupercaria;Labriformes;Labridae;Labrus;Labrus bergylta
UniRef100_UPI0011C14E3C	1	UPI0011C14E3C	zinc finger CCCH domain-containing protein 6	1162	1-1053	3.3e-145	486.8	Sparus aurata (Gilthead sea bream)	8175	cellular organisms;Eukaryota;Opisthokonta;Metazoa;Eumetazoa;Bilateria;Deuterostomia;Chordata;Craniata;Vertebrata;Gnathostomata;Teleostomi;Euteleostomi;Actinopterygii;Actinopteri;Neopterygii;Teleostei;Osteoglossocephalai;Clupeocephala;Euteleosteomorpha;Neoteleostei;Eurypterygia;Ctenosquamata;Acanthomorphata;Euacanthomorphacea;Percomorphaceae;Eupercaria;Spariformes;Sparidae;Sparus;Sparus aurata
UniRef100_UPI0011454498	1	UPI0011454498	zinc finger CCCH domain-containing protein 6	1146	1-1054	2.3e-143	480.7	Takifugu rubripes (Japanese pufferfish) (Fugu rubripes)	31033	cellular organisms;Eukaryota;Opisthokonta;Metazoa;Eumetazoa;Bilateria;Deuterostomia;Chordata;Craniata;Vertebrata;Gnathostomata;Teleostomi;Euteleostomi;Actinopterygii;Actinopteri;Neopterygii;Teleostei;Osteoglossocephalai;Clupeocephala;Euteleosteomorpha;Neoteleostei;Eurypterygia;Ctenosquamata;Acanthomorphata;Euacanthomorphacea;Percomorphaceae;Eupercaria;Tetraodontiformes;Tetraodontoidei;Tetradontoi…
UniRef100_H2U6X1	1	H2U6X1	Zinc finger CCCH-type containing 6	1146	1-1054	4.3e-143	479.8	Takifugu rubripes (Japanese pufferfish) (Fugu rubripes)	31033	cellular organisms;Eukaryota;Opisthokonta;Metazoa;Eumetazoa;Bilateria;Deuterostomia;Chordata;Craniata;Vertebrata;Gnathostomata;Teleostomi;Euteleostomi;Actinopterygii;Actinopteri;Neopterygii;Teleostei;Osteoglossocephalai;Clupeocephala;Euteleosteomorpha;Neoteleostei;Eurypterygia;Ctenosquamata;Acanthomorphata;Euacanthomorphacea;Percomorphaceae;Eupercaria;Tetraodontiformes;Tetraodontoidei;Tetradontoi…
UniRef100_H3DGR9	1	H3DGR9	Zinc finger CCCH-type containing 6	1057	1-1004	1.4e-135	454.9	Tetraodon nigroviridis (Spotted green pufferfish) (Chelonodon nigroviridis)	99883	cellular organisms;Eukaryota;Opisthokonta;Metazoa;Eumetazoa;Bilateria;Deuterostomia;Chordata;Craniata;Vertebrata;Gnathostomata;Teleostomi;Euteleostomi;Actinopterygii;Actinopteri;Neopterygii;Teleostei;Osteoglossocephalai;Clupeocephala;Euteleosteomorpha;Neoteleostei;Eurypterygia;Ctenosquamata;Acanthomorphata;Euacanthomorphacea;Percomorphaceae;Eupercaria;Tetraodontiformes;Tetraodontoidei;Tetradontoi…
UniRef100_H3C0K3	1	H3C0K3	Zinc finger CCCH-type containing 6	903	2-843	1.1e-111	375.8	Tetraodon nigroviridis (Spotted green pufferfish) (Chelonodon nigroviridis)	99883	cellular organisms;Eukaryota;Opisthokonta;Metazoa;Eumetazoa;Bilateria;Deuterostomia;Chordata;Craniata;Vertebrata;Gnathostomata;Teleostomi;Euteleostomi;Actinopterygii;Actinopteri;Neopterygii;Teleostei;Osteoglossocephalai;Clupeocephala;Euteleosteomorpha;Neoteleostei;Eurypterygia;Ctenosquamata;Acanthomorphata;Euacanthomorphacea;Percomorphaceae;Eupercaria;Tetraodontiformes;Tetraodontoidei;Tetradontoi…
UniRef100_Q4RQ54	1	Q4RQ54	Chromosome 17 SCAF15006 whole genome shotgun sequence (Fragment)	855	2-729	2.5e-101	341.6	Tetraodon nigroviridis (Spotted green pufferfish) (Chelonodon nigroviridis)	99883	cellular organisms;Eukaryota;Opisthokonta;Metazoa;Eumetazoa;Bilateria;Deuterostomia;Chordata;Craniata;Vertebrata;Gnathostomata;Teleostomi;Euteleostomi;Actinopterygii;Actinopteri;Neopterygii;Teleostei;Osteoglossocephalai;Clupeocephala;Euteleosteomorpha;Neoteleostei;Eurypterygia;Ctenosquamata;Acanthomorphata;Euacanthomorphacea;Percomorphaceae;Eupercaria;Tetraodontiformes;Tetraodontoidei;Tetradontoi…
UniRef100_UPI0011763A55	1	UPI0011763A55	zinc finger CCCH domain-containing protein 6	1178	1-1052	1.2e-146	491.5	Myripristis murdjan (pinecone soldierfish)	586833	cellular organisms;Eukaryota;Opisthokonta;Metazoa;Eumetazoa;Bilateria;Deuterostomia;Chordata;Craniata;Vertebrata;Gnathostomata;Teleostomi;Euteleostomi;Actinopterygii;Actinopteri;Neopterygii;Teleostei;Osteoglossocephalai;Clupeocephala;Euteleosteomorpha;Neoteleostei;Eurypterygia;Ctenosquamata;Acanthomorphata;Euacanthomorphacea;Holocentrimorphaceae;Holocentriformes;Holocentridae;Myripristinae;Myripr…
UniRef100_UPI0011B4FFA7	1	UPI0011B4FFA7	LOW QUALITY PROTEIN: zinc finger CCCH domain-containing protein 6-like	1279	3-1093	2.5e-125	421.0	Gadus morhua (Atlantic cod)	8049	cellular organisms;Eukaryota;Opisthokonta;Metazoa;Eumetazoa;Bilateria;Deuterostomia;Chordata;Craniata;Vertebrata;Gnathostomata;Teleostomi;Euteleostomi;Actinopterygii;Actinopteri;Neopterygii;Teleostei;Osteoglossocephalai;Clupeocephala;Euteleosteomorpha;Neoteleostei;Eurypterygia;Ctenosquamata;Acanthomorphata;Paracanthomorphacea;Zeiogadaria;Gadariae;Gadiformes;Gadoidei;Gadidae;Gadus;Gadus morhua
UniRef100_A0A1S3Q7V6	1	A0A1S3Q7V6	zinc finger CCCH domain-containing protein 6-like	1316	16-1217	5.3e-122	410.0	Salmo salar (Atlantic salmon)	8030	cellular organisms;Eukaryota;Opisthokonta;Metazoa;Eumetazoa;Bilateria;Deuterostomia;Chordata;Craniata;Vertebrata;Gnathostomata;Teleostomi;Euteleostomi;Actinopterygii;Actinopteri;Neopterygii;Teleostei;Osteoglossocephalai;Clupeocephala;Euteleosteomorpha;Protacanthopterygii;Salmoniformes;Salmonidae;Salmoninae;Salmo;Salmo salar
UniRef100_UPI001130D79F	1	UPI001130D79F	zinc finger CCCH domain-containing protein 6	1315	16-1216	1.3e-120	405.4	Salmo trutta (Brown trout)	8032	cellular organisms;Eukaryota;Opisthokonta;Metazoa;Eumetazoa;Bilateria;Deuterostomia;Chordata;Craniata;Vertebrata;Gnathostomata;Teleostomi;Euteleostomi;Actinopterygii;Actinopteri;Neopterygii;Teleostei;Osteoglossocephalai;Clupeocephala;Euteleosteomorpha;Protacanthopterygii;Salmoniformes;Salmonidae;Salmoninae;Salmo;Salmo trutta
UniRef100_UPI0011328400	1	UPI0011328400	zinc finger CCCH domain-containing protein 6	1310	16-1216	2.5e-120	404.4	Oncorhynchus nerka (Sockeye salmon) (Salmo nerka)	8023	cellular organisms;Eukaryota;Opisthokonta;Metazoa;Eumetazoa;Bilateria;Deuterostomia;Chordata;Craniata;Vertebrata;Gnathostomata;Teleostomi;Euteleostomi;Actinopterygii;Actinopteri;Neopterygii;Teleostei;Osteoglossocephalai;Clupeocephala;Euteleosteomorpha;Protacanthopterygii;Salmoniformes;Salmonidae;Salmoninae;Oncorhynchus;Oncorhynchus nerka
UniRef100_UPI00099F4DE3	1	UPI00099F4DE3	zinc finger CCCH domain-containing protein 6	1317	16-1219	4.4e-120	403.6	Oncorhynchus kisutch (Coho salmon) (Salmo kisutch)	8019	cellular organisms;Eukaryota;Opisthokonta;Metazoa;Eumetazoa;Bilateria;Deuterostomia;Chordata;Craniata;Vertebrata;Gnathostomata;Teleostomi;Euteleostomi;Actinopterygii;Actinopteri;Neopterygii;Teleostei;Osteoglossocephalai;Clupeocephala;Euteleosteomorpha;Protacanthopterygii;Salmoniformes;Salmonidae;Salmoninae;Oncorhynchus;Oncorhynchus kisutch
UniRef100_UPI000CDFA478	1	UPI000CDFA478	zinc finger CCCH domain-containing protein 6	1309	16-1212	2e-118	398.1	Salvelinus alpinus (Arctic char) (Salmo alpinus)	8036	cellular organisms;Eukaryota;Opisthokonta;Metazoa;Eumetazoa;Bilateria;Deuterostomia;Chordata;Craniata;Vertebrata;Gnathostomata;Teleostomi;Euteleostomi;Actinopterygii;Actinopteri;Neopterygii;Teleostei;Osteoglossocephalai;Clupeocephala;Euteleosteomorpha;Protacanthopterygii;Salmoniformes;Salmonidae;Salmoninae;Salvelinus;Salvelinus alpinus
UniRef100_A0A3P8Y5L3	1	A0A3P8Y5L3	Zinc finger CCCH-type containing 6	1314	2-1212	7.3e-121	406.2	Esox lucius (Northern pike)	8010	cellular organisms;Eukaryota;Opisthokonta;Metazoa;Eumetazoa;Bilateria;Deuterostomia;Chordata;Craniata;Vertebrata;Gnathostomata;Teleostomi;Euteleostomi;Actinopterygii;Actinopteri;Neopterygii;Teleostei;Osteoglossocephalai;Clupeocephala;Euteleosteomorpha;Protacanthopterygii;Esociformes;Esocidae;Esox;Esox lucius
UniRef100_UPI0010A31544	1	UPI0010A31544	zinc finger CCCH domain-containing protein 6	1154	1-1034	7.6e-147	492.2	Denticeps clupeoides (denticle herring)	299321	cellular organisms;Eukaryota;Opisthokonta;Metazoa;Eumetazoa;Bilateria;Deuterostomia;Chordata;Craniata;Vertebrata;Gnathostomata;Teleostomi;Euteleostomi;Actinopterygii;Actinopteri;Neopterygii;Teleostei;Osteoglossocephalai;Clupeocephala;Otomorpha;Clupei;Clupeiformes;Denticipitoidei;Denticipitidae;Denticeps;Denticeps clupeoides
UniRef100_UPI000CD64200	1	UPI000CD64200	zinc finger CCCH domain-containing protein 6 isoform X1	1110	1-1003	8.9e-158	528.3	Paramormyrops kingsleyae	1676925	cellular organisms;Eukaryota;Opisthokonta;Metazoa;Eumetazoa;Bilateria;Deuterostomia;Chordata;Craniata;Vertebrata;Gnathostomata;Teleostomi;Euteleostomi;Actinopterygii;Actinopteri;Neopterygii;Teleostei;Osteoglossocephalai;Osteoglossocephala;Osteoglossomorpha;Osteoglossiformes;Mormyridae;Paramormyrops;Paramormyrops kingsleyae
UniRef100_UPI000CD66612	1	UPI000CD66612	zinc finger CCCH domain-containing protein 6 isoform X2	1110	21-1003	2.7e-155	520.1	Paramormyrops kingsleyae	1676925	cellular organisms;Eukaryota;Opisthokonta;Metazoa;Eumetazoa;Bilateria;Deuterostomia;Chordata;Craniata;Vertebrata;Gnathostomata;Teleostomi;Euteleostomi;Actinopterygii;Actinopteri;Neopterygii;Teleostei;Osteoglossocephalai;Osteoglossocephala;Osteoglossomorpha;Osteoglossiformes;Mormyridae;Paramormyrops;Paramormyrops kingsleyae
UniRef100_UPI000CD66E30	1	UPI000CD66E30	zinc finger CCCH domain-containing protein 6 isoform X5	1096	16-989	2.2e-155	520.4	Paramormyrops kingsleyae	1676925	cellular organisms;Eukaryota;Opisthokonta;Metazoa;Eumetazoa;Bilateria;Deuterostomia;Chordata;Craniata;Vertebrata;Gnathostomata;Teleostomi;Euteleostomi;Actinopterygii;Actinopteri;Neopterygii;Teleostei;Osteoglossocephalai;Osteoglossocephala;Osteoglossomorpha;Osteoglossiformes;Mormyridae;Paramormyrops;Paramormyrops kingsleyae
UniRef100_UPI000CD66CEE	1	UPI000CD66CEE	zinc finger CCCH domain-containing protein 6 isoform X3	1109	1-1002	1.2e-157	528.0	Paramormyrops kingsleyae	1676925	cellular organisms;Eukaryota;Opisthokonta;Metazoa;Eumetazoa;Bilateria;Deuterostomia;Chordata;Craniata;Vertebrata;Gnathostomata;Teleostomi;Euteleostomi;Actinopterygii;Actinopteri;Neopterygii;Teleostei;Osteoglossocephalai;Osteoglossocephala;Osteoglossomorpha;Osteoglossiformes;Mormyridae;Paramormyrops;Paramormyrops kingsleyae
UniRef100_A0A3B3RZK9	1	A0A3B3RZK9	Zinc finger CCCH-type containing 6	851	126-744	3.8e-119	400.5	Paramormyrops kingsleyae	1676925	cellular organisms;Eukaryota;Opisthokonta;Metazoa;Eumetazoa;Bilateria;Deuterostomia;Chordata;Craniata;Vertebrata;Gnathostomata;Teleostomi;Euteleostomi;Actinopterygii;Actinopteri;Neopterygii;Teleostei;Osteoglossocephalai;Osteoglossocephala;Osteoglossomorpha;Osteoglossiformes;Mormyridae;Paramormyrops;Paramormyrops kingsleyae
UniRef100_A0A3B3S1K1	1	A0A3B3S1K1	Zinc finger CCCH-type containing 6	997	92-890	3.4e-118	397.4	Paramormyrops kingsleyae	1676925	cellular organisms;Eukaryota;Opisthokonta;Metazoa;Eumetazoa;Bilateria;Deuterostomia;Chordata;Craniata;Vertebrata;Gnathostomata;Teleostomi;Euteleostomi;Actinopterygii;Actinopteri;Neopterygii;Teleostei;Osteoglossocephalai;Osteoglossocephala;Osteoglossomorpha;Osteoglossiformes;Mormyridae;Paramormyrops;Paramormyrops kingsleyae
UniRef100_UPI000CD661EA	1	UPI000CD661EA	zinc finger CCCH domain-containing protein 6 isoform X4	1100	17-993	1.8e-155	520.7	Paramormyrops kingsleyae	1676925	cellular organisms;Eukaryota;Opisthokonta;Metazoa;Eumetazoa;Bilateria;Deuterostomia;Chordata;Craniata;Vertebrata;Gnathostomata;Teleostomi;Euteleostomi;Actinopterygii;Actinopteri;Neopterygii;Teleostei;Osteoglossocephalai;Osteoglossocephala;Osteoglossomorpha;Osteoglossiformes;Mormyridae;Paramormyrops;Paramormyrops kingsleyae
UniRef100_UPI000878B154	1	UPI000878B154	zinc finger CCCH domain-containing protein 6 isoform X1	1158	1-1093	1.1e-152	511.4	Scleropages formosus (Asian bonytongue) (Osteoglossum formosum)	113540	cellular organisms;Eukaryota;Opisthokonta;Metazoa;Eumetazoa;Bilateria;Deuterostomia;Chordata;Craniata;Vertebrata;Gnathostomata;Teleostomi;Euteleostomi;Actinopterygii;Actinopteri;Neopterygii;Teleostei;Osteoglossocephalai;Osteoglossocephala;Osteoglossomorpha;Osteoglossiformes;Osteoglossidae;Scleropages;Scleropages formosus
UniRef100_UPI0008781902	1	UPI0008781902	zinc finger CCCH domain-containing protein 6 isoform X2	1158	20-1093	1e-150	505.0	Scleropages formosus (Asian bonytongue) (Osteoglossum formosum)	113540	cellular organisms;Eukaryota;Opisthokonta;Metazoa;Eumetazoa;Bilateria;Deuterostomia;Chordata;Craniata;Vertebrata;Gnathostomata;Teleostomi;Euteleostomi;Actinopterygii;Actinopteri;Neopterygii;Teleostei;Osteoglossocephalai;Osteoglossocephala;Osteoglossomorpha;Osteoglossiformes;Osteoglossidae;Scleropages;Scleropages formosus
UniRef100_UPI0008782390	1	UPI0008782390	zinc finger CCCH domain-containing protein 6 isoform X3	1042	1-977	1e-149	501.7	Scleropages formosus (Asian bonytongue) (Osteoglossum formosum)	113540	cellular organisms;Eukaryota;Opisthokonta;Metazoa;Eumetazoa;Bilateria;Deuterostomia;Chordata;Craniata;Vertebrata;Gnathostomata;Teleostomi;Euteleostomi;Actinopterygii;Actinopteri;Neopterygii;Teleostei;Osteoglossocephalai;Osteoglossocephala;Osteoglossomorpha;Osteoglossiformes;Osteoglossidae;Scleropages;Scleropages formosus
UniRef100_W5NII1	1	W5NII1	Zinc finger CCCH-type containing 6	1183	1-1116	1e-165	554.6	Lepisosteus oculatus (Spotted gar)	7918	cellular organisms;Eukaryota;Opisthokonta;Metazoa;Eumetazoa;Bilateria;Deuterostomia;Chordata;Craniata;Vertebrata;Gnathostomata;Teleostomi;Euteleostomi;Actinopterygii;Actinopteri;Neopterygii;Holostei;Semionotiformes;Lepisosteidae;Lepisosteus;Lepisosteus oculatus
UniRef100_UPI00073FC450	1	UPI00073FC450	zinc finger CCCH domain-containing protein 6-like	1181	1-1114	3.1e-165	553.0	Lepisosteus oculatus (Spotted gar)	7918	cellular organisms;Eukaryota;Opisthokonta;Metazoa;Eumetazoa;Bilateria;Deuterostomia;Chordata;Craniata;Vertebrata;Gnathostomata;Teleostomi;Euteleostomi;Actinopterygii;Actinopteri;Neopterygii;Holostei;Semionotiformes;Lepisosteidae;Lepisosteus;Lepisosteus oculatus
UniRef100_UPI00109F7DC4	1	UPI00109F7DC4	zinc finger CCCH domain-containing protein 6	1078	1-1009	2.2e-161	540.3	Erpetoichthys calabaricus (Rope fish) (Calamoichthys calabaricus)	27687	cellular organisms;Eukaryota;Opisthokonta;Metazoa;Eumetazoa;Bilateria;Deuterostomia;Chordata;Craniata;Vertebrata;Gnathostomata;Teleostomi;Euteleostomi;Actinopterygii;Cladistia;Polypteriformes;Polypteridae;Erpetoichthys;Erpetoichthys calabaricus
UniRef100_A0A444UPV2	1	A0A444UPV2	Zinc finger CCCH domain-containing protein 6	1151	15-1083	2.3e-148	497.2	Acipenser ruthenus (Sterlet sturgeon)	7906	cellular organisms;Eukaryota;Opisthokonta;Metazoa;Eumetazoa;Bilateria;Deuterostomia;Chordata;Craniata;Vertebrata;Gnathostomata;Teleostomi;Euteleostomi;Actinopterygii;Actinopteri;Chondrostei;Acipenseriformes;Acipenseroidei;Acipenseridae;Acipenserinae;Acipenserini;Acipenser;Acipenser ruthenus
UniRef100_A0A401NQV2	1	A0A401NQV2	Uncharacterized protein	1263	1-1194	3.9e-160	536.1	Scyliorhinus torazame (Cloudy catshark)	75743	cellular organisms;Eukaryota;Opisthokonta;Metazoa;Eumetazoa;Bilateria;Deuterostomia;Chordata;Craniata;Vertebrata;Gnathostomata;Chondrichthyes;Elasmobranchii;Selachii;Galeomorphii;Galeoidea;Carcharhiniformes;Scyliorhinidae;Scyliorhinus;Scyliorhinus torazame
UniRef100_UPI0009A29275	1	UPI0009A29275	zinc finger CCCH domain-containing protein 6 isoform X2	1263	1-1195	1.2e-156	524.6	Rhincodon typus (whale shark)	259920	cellular organisms;Eukaryota;Opisthokonta;Metazoa;Eumetazoa;Bilateria;Deuterostomia;Chordata;Craniata;Vertebrata;Gnathostomata;Chondrichthyes;Elasmobranchii;Selachii;Galeomorphii;Galeoidea;Orectolobiformes;Rhincodontidae;Rhincodon;Rhincodon typus
UniRef100_UPI0009A29A66	1	UPI0009A29A66	zinc finger CCCH domain-containing protein 6 isoform X1	1264	1-1196	7.1e-155	518.7	Rhincodon typus (whale shark)	259920	cellular organisms;Eukaryota;Opisthokonta;Metazoa;Eumetazoa;Bilateria;Deuterostomia;Chordata;Craniata;Vertebrata;Gnathostomata;Chondrichthyes;Elasmobranchii;Selachii;Galeomorphii;Galeoidea;Orectolobiformes;Rhincodontidae;Rhincodon;Rhincodon typus
UniRef100_A0A401SK16	1	A0A401SK16	Uncharacterized protein	1264	1-1197	4.2e-155	519.5	Chiloscyllium punctatum (Brownbanded bambooshark) (Hemiscyllium punctatum)	137246	cellular organisms;Eukaryota;Opisthokonta;Metazoa;Eumetazoa;Bilateria;Deuterostomia;Chordata;Craniata;Vertebrata;Gnathostomata;Chondrichthyes;Elasmobranchii;Selachii;Galeomorphii;Galeoidea;Orectolobiformes;Hemiscylliidae;Chiloscyllium;Chiloscyllium punctatum
UniRef100_UPI000457144B	1	UPI000457144B	zinc finger CCCH domain-containing protein 6-like isoform X1	1298	1-1173	2e-146	490.8	Callorhinchus milii (Ghost shark)	7868	cellular organisms;Eukaryota;Opisthokonta;Metazoa;Eumetazoa;Bilateria;Deuterostomia;Chordata;Craniata;Vertebrata;Gnathostomata;Chondrichthyes;Holocephali;Chimaeriformes;Callorhinchidae;Callorhinchus;Callorhinchus milii
UniRef100_UPI0004575F01	1	UPI0004575F01	zinc finger CCCH domain-containing protein 6-like isoform X2	1268	3-1143	1.6e-142	477.9	Callorhinchus milii (Ghost shark)	7868	cellular organisms;Eukaryota;Opisthokonta;Metazoa;Eumetazoa;Bilateria;Deuterostomia;Chordata;Craniata;Vertebrata;Gnathostomata;Chondrichthyes;Holocephali;Chimaeriformes;Callorhinchidae;Callorhinchus;Callorhinchus milii
UniRef100_A0A4W3IVK2	1	A0A4W3IVK2	Uncharacterized protein	1066	10-940	6.9e-101	340.1	Callorhinchus milii (Ghost shark)	7868	cellular organisms;Eukaryota;Opisthokonta;Metazoa;Eumetazoa;Bilateria;Deuterostomia;Chordata;Craniata;Vertebrata;Gnathostomata;Chondrichthyes;Holocephali;Chimaeriformes;Callorhinchidae;Callorhinchus;Callorhinchus milii
UniRef100_UPI0007AD2B0E	1	UPI0007AD2B0E	zinc finger CCCH domain-containing protein 4-like	1333	2-1245	1.9e-245	818.4	Sinocyclocheilus grahami (Dianchi golden-line fish) (Barbus grahami)	75366	cellular organisms;Eukaryota;Opisthokonta;Metazoa;Eumetazoa;Bilateria;Deuterostomia;Chordata;Craniata;Vertebrata;Gnathostomata;Teleostomi;Euteleostomi;Actinopterygii;Actinopteri;Neopterygii;Teleostei;Osteoglossocephalai;Clupeocephala;Otomorpha;Ostariophysi;Otophysi;Cypriniphysae;Cypriniformes;Cyprinoidei;Cyprinidae;Sinocyclocheilus;Sinocyclocheilus grahami
UniRef100_UPI0007B98275	1	UPI0007B98275	LOW QUALITY PROTEIN: zinc finger CCCH domain-containing protein 4-like	1334	2-1246	6.4e-240	800.1	Sinocyclocheilus anshuiensis	1608454	cellular organisms;Eukaryota;Opisthokonta;Metazoa;Eumetazoa;Bilateria;Deuterostomia;Chordata;Craniata;Vertebrata;Gnathostomata;Teleostomi;Euteleostomi;Actinopterygii;Actinopteri;Neopterygii;Teleostei;Osteoglossocephalai;Clupeocephala;Otomorpha;Ostariophysi;Otophysi;Cypriniphysae;Cypriniformes;Cyprinoidei;Cyprinidae;Sinocyclocheilus;Sinocyclocheilus anshuiensis
UniRef100_UPI0007BAC3D9	1	UPI0007BAC3D9	zinc finger CCCH domain-containing protein 4-like	1333	2-1245	1e-245	819.2	Sinocyclocheilus rhinocerous	307959	cellular organisms;Eukaryota;Opisthokonta;Metazoa;Eumetazoa;Bilateria;Deuterostomia;Chordata;Craniata;Vertebrata;Gnathostomata;Teleostomi;Euteleostomi;Actinopterygii;Actinopteri;Neopterygii;Teleostei;Osteoglossocephalai;Clupeocephala;Otomorpha;Ostariophysi;Otophysi;Cypriniphysae;Cypriniformes;Cyprinoidei;Cyprinidae;Sinocyclocheilus;Sinocyclocheilus rhinocerous
UniRef100_UPI000E41DA8E	1	UPI000E41DA8E	zinc finger CCCH domain-containing protein 4-like isoform X1	1331	2-1243	1.2e-238	795.9	Carassius auratus (Goldfish)	7957	cellular organisms;Eukaryota;Opisthokonta;Metazoa;Eumetazoa;Bilateria;Deuterostomia;Chordata;Craniata;Vertebrata;Gnathostomata;Teleostomi;Euteleostomi;Actinopterygii;Actinopteri;Neopterygii;Teleostei;Osteoglossocephalai;Clupeocephala;Otomorpha;Ostariophysi;Otophysi;Cypriniphysae;Cypriniformes;Cyprinoidei;Cyprinidae;Carassius;Carassius auratus
UniRef100_UPI000E40C764	1	UPI000E40C764	zinc finger CCCH domain-containing protein 4-like isoform X2	1307	5-1219	2.6e-236	788.2	Carassius auratus (Goldfish)	7957	cellular organisms;Eukaryota;Opisthokonta;Metazoa;Eumetazoa;Bilateria;Deuterostomia;Chordata;Craniata;Vertebrata;Gnathostomata;Teleostomi;Euteleostomi;Actinopterygii;Actinopteri;Neopterygii;Teleostei;Osteoglossocephalai;Clupeocephala;Otomorpha;Ostariophysi;Otophysi;Cypriniphysae;Cypriniformes;Cyprinoidei;Cyprinidae;Carassius;Carassius auratus
UniRef100_UPI000E3FB450	1	UPI000E3FB450	zinc finger CCCH domain-containing protein 4-like isoform X3	1296	2-1208	2.7e-230	768.2	Carassius auratus (Goldfish)	7957	cellular organisms;Eukaryota;Opisthokonta;Metazoa;Eumetazoa;Bilateria;Deuterostomia;Chordata;Craniata;Vertebrata;Gnathostomata;Teleostomi;Euteleostomi;Actinopterygii;Actinopteri;Neopterygii;Teleostei;Osteoglossocephalai;Clupeocephala;Otomorpha;Ostariophysi;Otophysi;Cypriniphysae;Cypriniformes;Cyprinoidei;Cyprinidae;Carassius;Carassius auratus
UniRef100_UPI0008F9F074	1	UPI0008F9F074	zinc finger CCCH domain-containing protein 4-like	806	2-798	2.1e-147	494.0	Cyprinus carpio (Common carp)	7962	cellular organisms;Eukaryota;Opisthokonta;Metazoa;Eumetazoa;Bilateria;Deuterostomia;Chordata;Craniata;Vertebrata;Gnathostomata;Teleostomi;Euteleostomi;Actinopterygii;Actinopteri;Neopterygii;Teleostei;Osteoglossocephalai;Clupeocephala;Otomorpha;Ostariophysi;Otophysi;Cypriniphysae;Cypriniformes;Cyprinoidei;Cyprinidae;Cyprinus;Cyprinus carpio
UniRef100_UPI0007ACC74F	1	UPI0007ACC74F	zinc finger CCCH domain-containing protein 4-like isoform X1	1334	2-1246	1.7e-240	802.0	Sinocyclocheilus grahami (Dianchi golden-line fish) (Barbus grahami)	75366	cellular organisms;Eukaryota;Opisthokonta;Metazoa;Eumetazoa;Bilateria;Deuterostomia;Chordata;Craniata;Vertebrata;Gnathostomata;Teleostomi;Euteleostomi;Actinopterygii;Actinopteri;Neopterygii;Teleostei;Osteoglossocephalai;Clupeocephala;Otomorpha;Ostariophysi;Otophysi;Cypriniphysae;Cypriniformes;Cyprinoidei;Cyprinidae;Sinocyclocheilus;Sinocyclocheilus grahami
UniRef100_UPI0007B9FF3E	1	UPI0007B9FF3E	zinc finger CCCH domain-containing protein 4-like isoform X1	1334	2-1244	4.1e-239	797.4	Sinocyclocheilus anshuiensis	1608454	cellular organisms;Eukaryota;Opisthokonta;Metazoa;Eumetazoa;Bilateria;Deuterostomia;Chordata;Craniata;Vertebrata;Gnathostomata;Teleostomi;Euteleostomi;Actinopterygii;Actinopteri;Neopterygii;Teleostei;Osteoglossocephalai;Clupeocephala;Otomorpha;Ostariophysi;Otophysi;Cypriniphysae;Cypriniformes;Cyprinoidei;Cyprinidae;Sinocyclocheilus;Sinocyclocheilus anshuiensis
UniRef100_UPI0007B8626A	1	UPI0007B8626A	zinc finger CCCH domain-containing protein 4-like	1332	2-1244	2e-239	798.4	Sinocyclocheilus rhinocerous	307959	cellular organisms;Eukaryota;Opisthokonta;Metazoa;Eumetazoa;Bilateria;Deuterostomia;Chordata;Craniata;Vertebrata;Gnathostomata;Teleostomi;Euteleostomi;Actinopterygii;Actinopteri;Neopterygii;Teleostei;Osteoglossocephalai;Clupeocephala;Otomorpha;Ostariophysi;Otophysi;Cypriniphysae;Cypriniformes;Cyprinoidei;Cyprinidae;Sinocyclocheilus;Sinocyclocheilus rhinocerous
UniRef100_UPI000E41A26E	1	UPI000E41A26E	zinc finger CCCH domain-containing protein 4-like isoform X1	1331	2-1243	3.5e-239	797.7	Carassius auratus (Goldfish)	7957	cellular organisms;Eukaryota;Opisthokonta;Metazoa;Eumetazoa;Bilateria;Deuterostomia;Chordata;Craniata;Vertebrata;Gnathostomata;Teleostomi;Euteleostomi;Actinopterygii;Actinopteri;Neopterygii;Teleostei;Osteoglossocephalai;Clupeocephala;Otomorpha;Ostariophysi;Otophysi;Cypriniphysae;Cypriniformes;Cyprinoidei;Cyprinidae;Carassius;Carassius auratus
UniRef100_UPI000E3FB070	1	UPI000E3FB070	zinc finger CCCH domain-containing protein 4-like isoform X2	1305	3-1217	2.5e-237	791.5	Carassius auratus (Goldfish)	7957	cellular organisms;Eukaryota;Opisthokonta;Metazoa;Eumetazoa;Bilateria;Deuterostomia;Chordata;Craniata;Vertebrata;Gnathostomata;Teleostomi;Euteleostomi;Actinopterygii;Actinopteri;Neopterygii;Teleostei;Osteoglossocephalai;Clupeocephala;Otomorpha;Ostariophysi;Otophysi;Cypriniphysae;Cypriniformes;Cyprinoidei;Cyprinidae;Carassius;Carassius auratus
UniRef100_A0A498N5L8	1	A0A498N5L8	Zinc finger CCCH domain-containing 4-like protein	992	13-904	3.2e-149	500.0	Labeo rohita (Indian major carp) (Cyprinus rohita)	84645	cellular organisms;Eukaryota;Opisthokonta;Metazoa;Eumetazoa;Bilateria;Deuterostomia;Chordata;Craniata;Vertebrata;Gnathostomata;Teleostomi;Euteleostomi;Actinopterygii;Actinopteri;Neopterygii;Teleostei;Osteoglossocephalai;Clupeocephala;Otomorpha;Ostariophysi;Otophysi;Cypriniphysae;Cypriniformes;Cyprinoidei;Cyprinidae;Labeo;Labeo rohita
UniRef100_A0A498LJA6	1	A0A498LJA6	Zinc finger CCCH domain-containing 4-like protein	926	13-838	6.9e-147	492.3	Labeo rohita (Indian major carp) (Cyprinus rohita)	84645	cellular organisms;Eukaryota;Opisthokonta;Metazoa;Eumetazoa;Bilateria;Deuterostomia;Chordata;Craniata;Vertebrata;Gnathostomata;Teleostomi;Euteleostomi;Actinopterygii;Actinopteri;Neopterygii;Teleostei;Osteoglossocephalai;Clupeocephala;Otomorpha;Ostariophysi;Otophysi;Cypriniphysae;Cypriniformes;Cyprinoidei;Cyprinidae;Labeo;Labeo rohita
UniRef100_E7FGZ9	1	E7FGZ9	Zinc finger CCCH-type-containing 4	1340	2-1252	3.3e-243	811.0	Danio rerio (Zebrafish) (Brachydanio rerio)	7955	cellular organisms;Eukaryota;Opisthokonta;Metazoa;Eumetazoa;Bilateria;Deuterostomia;Chordata;Craniata;Vertebrata;Gnathostomata;Teleostomi;Euteleostomi;Actinopterygii;Actinopteri;Neopterygii;Teleostei;Osteoglossocephalai;Clupeocephala;Otomorpha;Ostariophysi;Otophysi;Cypriniphysae;Cypriniformes;Cyprinoidei;Cyprinidae;Danio;Danio rerio
UniRef100_A0A553RC75	1	A0A553RC75	Uncharacterized protein	1230	8-1145	6.7e-180	601.5	Danionella translucida	623744	cellular organisms;Eukaryota;Opisthokonta;Metazoa;Eumetazoa;Bilateria;Deuterostomia;Chordata;Craniata;Vertebrata;Gnathostomata;Teleostomi;Euteleostomi;Actinopterygii;Actinopteri;Neopterygii;Teleostei;Osteoglossocephalai;Clupeocephala;Otomorpha;Ostariophysi;Otophysi;Cypriniphysae;Cypriniformes;Cyprinoidei;Cyprinidae;Danionella;Danionella translucida
UniRef100_A0A5A9MYA9	1	A0A5A9MYA9	Zinc finger CCCH domain-containing protein 4	1320	2-1232	3.8e-228	761.1	Triplophysa tibetana	1572043	cellular organisms;Eukaryota;Opisthokonta;Metazoa;Eumetazoa;Bilateria;Deuterostomia;Chordata;Craniata;Vertebrata;Gnathostomata;Teleostomi;Euteleostomi;Actinopterygii;Actinopteri;Neopterygii;Teleostei;Osteoglossocephalai;Clupeocephala;Otomorpha;Ostariophysi;Otophysi;Cypriniphysae;Cypriniformes;Cobitoidei;Nemacheilidae;Triplophysa;Triplophysa tibetana
UniRef100_UPI00081440C3	1	UPI00081440C3	zinc finger CCCH domain-containing protein 4	1311	2-1222	6.7e-234	780.2	Pygocentrus nattereri (Red-bellied piranha)	42514	cellular organisms;Eukaryota;Opisthokonta;Metazoa;Eumetazoa;Bilateria;Deuterostomia;Chordata;Craniata;Vertebrata;Gnathostomata;Teleostomi;Euteleostomi;Actinopterygii;Actinopteri;Neopterygii;Teleostei;Osteoglossocephalai;Clupeocephala;Otomorpha;Ostariophysi;Otophysi;Characiphysae;Characiformes;Characoidei;Serrasalmidae;Pygocentrus;Pygocentrus nattereri
UniRef100_W5KNX5	1	W5KNX5	Zinc finger CCCH-type containing 4	1296	6-1206	3.7e-226	754.6	Astyanax mexicanus (Blind cave fish) (Astyanax fasciatus mexicanus)	7994	cellular organisms;Eukaryota;Opisthokonta;Metazoa;Eumetazoa;Bilateria;Deuterostomia;Chordata;Craniata;Vertebrata;Gnathostomata;Teleostomi;Euteleostomi;Actinopterygii;Actinopteri;Neopterygii;Teleostei;Osteoglossocephalai;Clupeocephala;Otomorpha;Ostariophysi;Otophysi;Characiphysae;Characiformes;Characoidei;Characidae;Stethaprioninae;Astyanax;Astyanax mexicanus
UniRef100_A0A5N5M5E2	2	A0A5N5M5E2	Uncharacterized protein	1314	2-1226	6.1e-231	770.4	Pangasianodon hypophthalmus (Striped catfish) (Helicophagus hypophthalmus)	310915	cellular organisms;Eukaryota;Opisthokonta;Metazoa;Eumetazoa;Bilateria;Deuterostomia;Chordata;Craniata;Vertebrata;Gnathostomata;Teleostomi;Euteleostomi;Actinopterygii;Actinopteri;Neopterygii;Teleostei;Osteoglossocephalai;Clupeocephala;Otomorpha;Ostariophysi;Otophysi;Characiphysae;Siluriformes;Siluroidei;Pangasiidae;Pangasianodon;Pangasianodon hypophthalmus
UniRef100_UPI000F4F16C8	2	UPI000F4F16C8	zinc finger CCCH domain-containing protein 4 isoform X1	1318	2-1230	1.7e-215	719.3	Tachysurus fulvidraco (Yellow catfish) (Pimelodus fulvidraco)	1234273	cellular organisms;Eukaryota;Opisthokonta;Metazoa;Eumetazoa;Bilateria;Deuterostomia;Chordata;Craniata;Vertebrata;Gnathostomata;Teleostomi;Euteleostomi;Actinopterygii;Actinopteri;Neopterygii;Teleostei;Osteoglossocephalai;Clupeocephala;Otomorpha;Ostariophysi;Otophysi;Characiphysae;Siluriformes;Siluroidei;Bagridae;Tachysurus;Tachysurus fulvidraco
UniRef100_UPI000F4E62CB	1	UPI000F4E62CB	zinc finger CCCH domain-containing protein 4 isoform X3	1268	2-1180	7.3e-212	707.3	Tachysurus fulvidraco (Yellow catfish) (Pimelodus fulvidraco)	1234273	cellular organisms;Eukaryota;Opisthokonta;Metazoa;Eumetazoa;Bilateria;Deuterostomia;Chordata;Craniata;Vertebrata;Gnathostomata;Teleostomi;Euteleostomi;Actinopterygii;Actinopteri;Neopterygii;Teleostei;Osteoglossocephalai;Clupeocephala;Otomorpha;Ostariophysi;Otophysi;Characiphysae;Siluriformes;Siluroidei;Bagridae;Tachysurus;Tachysurus fulvidraco
UniRef100_A0A2D0SVY8	1	A0A2D0SVY8	zinc finger CCCH domain-containing protein 4	1326	2-1238	1.6e-225	752.5	Ictalurus punctatus (Channel catfish) (Silurus punctatus)	7998	cellular organisms;Eukaryota;Opisthokonta;Metazoa;Eumetazoa;Bilateria;Deuterostomia;Chordata;Craniata;Vertebrata;Gnathostomata;Teleostomi;Euteleostomi;Actinopterygii;Actinopteri;Neopterygii;Teleostei;Osteoglossocephalai;Clupeocephala;Otomorpha;Ostariophysi;Otophysi;Characiphysae;Siluriformes;Siluroidei;Ictaluridae;Ictalurus;Ictalurus punctatus
UniRef100_A0A556U6Z1	1	A0A556U6Z1	Zinc finger CCCH domain-containing protein 6	1284	2-1197	7e-175	584.9	Bagarius yarrelli (Goonch) (Bagrus yarrelli)	175774	cellular organisms;Eukaryota;Opisthokonta;Metazoa;Eumetazoa;Bilateria;Deuterostomia;Chordata;Craniata;Vertebrata;Gnathostomata;Teleostomi;Euteleostomi;Actinopterygii;Actinopteri;Neopterygii;Teleostei;Osteoglossocephalai;Clupeocephala;Otomorpha;Ostariophysi;Otophysi;Characiphysae;Siluriformes;Siluroidei;Sisoridae;Sisorinae;Bagarius;Bagarius yarrelli
UniRef100_UPI000F0A6C62	1	UPI000F0A6C62	zinc finger CCCH domain-containing protein 4	1330	2-1241	4.9e-230	767.4	Electrophorus electricus (Electric eel) (Gymnotus electricus)	8005	cellular organisms;Eukaryota;Opisthokonta;Metazoa;Eumetazoa;Bilateria;Deuterostomia;Chordata;Craniata;Vertebrata;Gnathostomata;Teleostomi;Euteleostomi;Actinopterygii;Actinopteri;Neopterygii;Teleostei;Osteoglossocephalai;Clupeocephala;Otomorpha;Ostariophysi;Otophysi;Characiphysae;Gymnotiformes;Gymnotoidei;Gymnotidae;Electrophorus;Electrophorus electricus
UniRef100_A0A4W4HLQ1	1	A0A4W4HLQ1	Zinc finger CCCH-type containing 4	1284	2-1195	4.6e-209	698.0	Electrophorus electricus (Electric eel) (Gymnotus electricus)	8005	cellular organisms;Eukaryota;Opisthokonta;Metazoa;Eumetazoa;Bilateria;Deuterostomia;Chordata;Craniata;Vertebrata;Gnathostomata;Teleostomi;Euteleostomi;Actinopterygii;Actinopteri;Neopterygii;Teleostei;Osteoglossocephalai;Clupeocephala;Otomorpha;Ostariophysi;Otophysi;Characiphysae;Gymnotiformes;Gymnotoidei;Gymnotidae;Electrophorus;Electrophorus electricus
UniRef100_UPI0011F149F3	1	UPI0011F149F3	zinc finger CCCH domain-containing protein 4	1358	2-1269	2.8e-230	768.2	Chanos chanos (Milkfish) (Mugil chanos)	29144	cellular organisms;Eukaryota;Opisthokonta;Metazoa;Eumetazoa;Bilateria;Deuterostomia;Chordata;Craniata;Vertebrata;Gnathostomata;Teleostomi;Euteleostomi;Actinopterygii;Actinopteri;Neopterygii;Teleostei;Osteoglossocephalai;Clupeocephala;Otomorpha;Ostariophysi;Anotophysi;Gonorynchiformes;Chanoidei;Chanidae;Chanos;Chanos chanos
UniRef100_UPI0007F929D5	1	UPI0007F929D5	zinc finger CCCH domain-containing protein 4 isoform X1	1355	2-1265	4.8e-231	770.7	Kryptolebias marmoratus (Mangrove killifish) (Rivulus marmoratus)	37003	cellular organisms;Eukaryota;Opisthokonta;Metazoa;Eumetazoa;Bilateria;Deuterostomia;Chordata;Craniata;Vertebrata;Gnathostomata;Teleostomi;Euteleostomi;Actinopterygii;Actinopteri;Neopterygii;Teleostei;Osteoglossocephalai;Clupeocephala;Euteleosteomorpha;Neoteleostei;Eurypterygia;Ctenosquamata;Acanthomorphata;Euacanthomorphacea;Percomorphaceae;Ovalentaria;Atherinomorphae;Cyprinodontiformes;Aplocheil…
UniRef100_UPI0007F8F0E0	1	UPI0007F8F0E0	zinc finger CCCH domain-containing protein 4 isoform X3	1338	12-1248	8.4e-230	766.6	Kryptolebias marmoratus (Mangrove killifish) (Rivulus marmoratus)	37003	cellular organisms;Eukaryota;Opisthokonta;Metazoa;Eumetazoa;Bilateria;Deuterostomia;Chordata;Craniata;Vertebrata;Gnathostomata;Teleostomi;Euteleostomi;Actinopterygii;Actinopteri;Neopterygii;Teleostei;Osteoglossocephalai;Clupeocephala;Euteleosteomorpha;Neoteleostei;Eurypterygia;Ctenosquamata;Acanthomorphata;Euacanthomorphacea;Percomorphaceae;Ovalentaria;Atherinomorphae;Cyprinodontiformes;Aplocheil…
UniRef100_A0A3Q3BG91	1	A0A3Q3BG91	Zinc finger CCCH-type containing 4	1354	2-1264	5.5e-231	770.5	Kryptolebias marmoratus (Mangrove killifish) (Rivulus marmoratus)	37003	cellular organisms;Eukaryota;Opisthokonta;Metazoa;Eumetazoa;Bilateria;Deuterostomia;Chordata;Craniata;Vertebrata;Gnathostomata;Teleostomi;Euteleostomi;Actinopterygii;Actinopteri;Neopterygii;Teleostei;Osteoglossocephalai;Clupeocephala;Euteleosteomorpha;Neoteleostei;Eurypterygia;Ctenosquamata;Acanthomorphata;Euacanthomorphacea;Percomorphaceae;Ovalentaria;Atherinomorphae;Cyprinodontiformes;Aplocheil…
UniRef100_A0A2I4D898	1	A0A2I4D898	zinc finger CCCH domain-containing protein 4 isoform X2	1323	2-1236	1.6e-216	722.7	Austrofundulus limnaeus	52670	cellular organisms;Eukaryota;Opisthokonta;Metazoa;Eumetazoa;Bilateria;Deuterostomia;Chordata;Craniata;Vertebrata;Gnathostomata;Teleostomi;Euteleostomi;Actinopterygii;Actinopteri;Neopterygii;Teleostei;Osteoglossocephalai;Clupeocephala;Euteleosteomorpha;Neoteleostei;Eurypterygia;Ctenosquamata;Acanthomorphata;Euacanthomorphacea;Percomorphaceae;Ovalentaria;Atherinomorphae;Cyprinodontiformes;Aplocheil…
UniRef100_A0A2I4D885	1	A0A2I4D885	zinc finger CCCH domain-containing protein 4 isoform X1	1324	2-1237	1.7e-216	722.6	Austrofundulus limnaeus	52670	cellular organisms;Eukaryota;Opisthokonta;Metazoa;Eumetazoa;Bilateria;Deuterostomia;Chordata;Craniata;Vertebrata;Gnathostomata;Teleostomi;Euteleostomi;Actinopterygii;Actinopteri;Neopterygii;Teleostei;Osteoglossocephalai;Clupeocephala;Euteleosteomorpha;Neoteleostei;Eurypterygia;Ctenosquamata;Acanthomorphata;Euacanthomorphacea;Percomorphaceae;Ovalentaria;Atherinomorphae;Cyprinodontiformes;Aplocheil…
UniRef100_A0A1A8MRM8	3	A0A1A8MRM8	Zinc finger CCCH-type containing 4	1352	6-1271	3.3e-228	761.3	Nothobranchius pienaari	704102	cellular organisms;Eukaryota;Opisthokonta;Metazoa;Eumetazoa;Bilateria;Deuterostomia;Chordata;Craniata;Vertebrata;Gnathostomata;Teleostomi;Euteleostomi;Actinopterygii;Actinopteri;Neopterygii;Teleostei;Osteoglossocephalai;Clupeocephala;Euteleosteomorpha;Neoteleostei;Eurypterygia;Ctenosquamata;Acanthomorphata;Euacanthomorphacea;Percomorphaceae;Ovalentaria;Atherinomorphae;Cyprinodontiformes;Aplocheil…
UniRef100_A0A1A8S679	1	A0A1A8S679	Zinc finger CCCH-type containing 4	1116	28-1035	1.3e-176	590.7	Nothobranchius rachovii (bluefin notho)	451742	cellular organisms;Eukaryota;Opisthokonta;Metazoa;Eumetazoa;Bilateria;Deuterostomia;Chordata;Craniata;Vertebrata;Gnathostomata;Teleostomi;Euteleostomi;Actinopterygii;Actinopteri;Neopterygii;Teleostei;Osteoglossocephalai;Clupeocephala;Euteleosteomorpha;Neoteleostei;Eurypterygia;Ctenosquamata;Acanthomorphata;Euacanthomorphacea;Percomorphaceae;Ovalentaria;Atherinomorphae;Cyprinodontiformes;Aplocheil…
UniRef100_A0A1A8RU96	1	A0A1A8RU96	Zinc finger CCCH-type containing 4	1107	19-1026	8.5e-177	591.3	Nothobranchius rachovii (bluefin notho)	451742	cellular organisms;Eukaryota;Opisthokonta;Metazoa;Eumetazoa;Bilateria;Deuterostomia;Chordata;Craniata;Vertebrata;Gnathostomata;Teleostomi;Euteleostomi;Actinopterygii;Actinopteri;Neopterygii;Teleostei;Osteoglossocephalai;Clupeocephala;Euteleosteomorpha;Neoteleostei;Eurypterygia;Ctenosquamata;Acanthomorphata;Euacanthomorphacea;Percomorphaceae;Ovalentaria;Atherinomorphae;Cyprinodontiformes;Aplocheil…
UniRef100_A0A1A8AEZ1	4	A0A1A8AEZ1	Zinc finger CCCH-type containing 4	1352	6-1271	1.6e-227	759.1	Nothobranchius furzeri (Turquoise killifish)	28779	cellular organisms;Eukaryota;Opisthokonta;Metazoa;Eumetazoa;Bilateria;Deuterostomia;Chordata;Craniata;Vertebrata;Gnathostomata;Teleostomi;Euteleostomi;Actinopterygii;Actinopteri;Neopterygii;Teleostei;Osteoglossocephalai;Clupeocephala;Euteleosteomorpha;Neoteleostei;Eurypterygia;Ctenosquamata;Acanthomorphata;Euacanthomorphacea;Percomorphaceae;Ovalentaria;Atherinomorphae;Cyprinodontiformes;Aplocheil…
UniRef100_A0A1A8DI33	1	A0A1A8DI33	Zinc finger CCCH-type containing 4	1107	19-1026	3.2e-176	589.3	Nothobranchius kadleci	1051664	cellular organisms;Eukaryota;Opisthokonta;Metazoa;Eumetazoa;Bilateria;Deuterostomia;Chordata;Craniata;Vertebrata;Gnathostomata;Teleostomi;Euteleostomi;Actinopterygii;Actinopteri;Neopterygii;Teleostei;Osteoglossocephalai;Clupeocephala;Euteleosteomorpha;Neoteleostei;Eurypterygia;Ctenosquamata;Acanthomorphata;Euacanthomorphacea;Percomorphaceae;Ovalentaria;Atherinomorphae;Cyprinodontiformes;Aplocheil…
UniRef100_A0A1A8HP02	2	A0A1A8HP02	Zinc finger CCCH-type containing 4	1116	28-1035	6e-176	588.4	Nothobranchius kuhntae (Beira killifish)	321403	cellular organisms;Eukaryota;Opisthokonta;Metazoa;Eumetazoa;Bilateria;Deuterostomia;Chordata;Craniata;Vertebrata;Gnathostomata;Teleostomi;Euteleostomi;Actinopterygii;Actinopteri;Neopterygii;Teleostei;Osteoglossocephalai;Clupeocephala;Euteleosteomorpha;Neoteleostei;Eurypterygia;Ctenosquamata;Acanthomorphata;Euacanthomorphacea;Percomorphaceae;Ovalentaria;Atherinomorphae;Cyprinodontiformes;Aplocheil…
UniRef100_A0A1A8GPI0	1	A0A1A8GPI0	Zinc finger CCCH-type containing 4	1082	4-1001	9.1e-168	561.4	Nothobranchius korthausae	1143690	cellular organisms;Eukaryota;Opisthokonta;Metazoa;Eumetazoa;Bilateria;Deuterostomia;Chordata;Craniata;Vertebrata;Gnathostomata;Teleostomi;Euteleostomi;Actinopterygii;Actinopteri;Neopterygii;Teleostei;Osteoglossocephalai;Clupeocephala;Euteleosteomorpha;Neoteleostei;Eurypterygia;Ctenosquamata;Acanthomorphata;Euacanthomorphacea;Percomorphaceae;Ovalentaria;Atherinomorphae;Cyprinodontiformes;Aplocheil…
UniRef100_A0A1A7WQ99	1	A0A1A7WQ99	Zinc finger CCCH-type containing 4	1302	6-1278	4.7e-227	757.5	Iconisemion striatum	60296	cellular organisms;Eukaryota;Opisthokonta;Metazoa;Eumetazoa;Bilateria;Deuterostomia;Chordata;Craniata;Vertebrata;Gnathostomata;Teleostomi;Euteleostomi;Actinopterygii;Actinopteri;Neopterygii;Teleostei;Osteoglossocephalai;Clupeocephala;Euteleosteomorpha;Neoteleostei;Eurypterygia;Ctenosquamata;Acanthomorphata;Euacanthomorphacea;Percomorphaceae;Ovalentaria;Atherinomorphae;Cyprinodontiformes;Aplocheil…
UniRef100_A0A087YGU8	1	A0A087YGU8	Zinc finger CCCH-type containing 4	1322	2-1233	9.3e-223	743.3	Poecilia formosa (Amazon molly) (Limia formosa)	48698	cellular organisms;Eukaryota;Opisthokonta;Metazoa;Eumetazoa;Bilateria;Deuterostomia;Chordata;Craniata;Vertebrata;Gnathostomata;Teleostomi;Euteleostomi;Actinopterygii;Actinopteri;Neopterygii;Teleostei;Osteoglossocephalai;Clupeocephala;Euteleosteomorpha;Neoteleostei;Eurypterygia;Ctenosquamata;Acanthomorphata;Euacanthomorphacea;Percomorphaceae;Ovalentaria;Atherinomorphae;Cyprinodontiformes;Cyprinodo…
UniRef100_UPI000443E5B8	1	UPI000443E5B8	zinc finger CCCH domain-containing protein 4 isoform X2	1302	2-1213	1.6e-221	739.2	Poecilia formosa (Amazon molly) (Limia formosa)	48698	cellular organisms;Eukaryota;Opisthokonta;Metazoa;Eumetazoa;Bilateria;Deuterostomia;Chordata;Craniata;Vertebrata;Gnathostomata;Teleostomi;Euteleostomi;Actinopterygii;Actinopteri;Neopterygii;Teleostei;Osteoglossocephalai;Clupeocephala;Euteleosteomorpha;Neoteleostei;Eurypterygia;Ctenosquamata;Acanthomorphata;Euacanthomorphacea;Percomorphaceae;Ovalentaria;Atherinomorphae;Cyprinodontiformes;Cyprinodo…
UniRef100_UPI0004441BB2	2	UPI0004441BB2	zinc finger CCCH domain-containing protein 4 isoform X1	1303	2-1214	1.8e-221	739.1	Poecilia formosa (Amazon molly) (Limia formosa)	48698	cellular organisms;Eukaryota;Opisthokonta;Metazoa;Eumetazoa;Bilateria;Deuterostomia;Chordata;Craniata;Vertebrata;Gnathostomata;Teleostomi;Euteleostomi;Actinopterygii;Actinopteri;Neopterygii;Teleostei;Osteoglossocephalai;Clupeocephala;Euteleosteomorpha;Neoteleostei;Eurypterygia;Ctenosquamata;Acanthomorphata;Euacanthomorphacea;Percomorphaceae;Ovalentaria;Atherinomorphae;Cyprinodontiformes;Cyprinodo…
UniRef100_A0A3B3WG58	1	A0A3B3WG58	Zinc finger CCCH-type containing 4	1302	2-1213	8.7e-222	740.1	Poecilia mexicana	48701	cellular organisms;Eukaryota;Opisthokonta;Metazoa;Eumetazoa;Bilateria;Deuterostomia;Chordata;Craniata;Vertebrata;Gnathostomata;Teleostomi;Euteleostomi;Actinopterygii;Actinopteri;Neopterygii;Teleostei;Osteoglossocephalai;Clupeocephala;Euteleosteomorpha;Neoteleostei;Eurypterygia;Ctenosquamata;Acanthomorphata;Euacanthomorphacea;Percomorphaceae;Ovalentaria;Atherinomorphae;Cyprinodontiformes;Cyprinodo…
UniRef100_UPI00072E539A	2	UPI00072E539A	zinc finger CCCH domain-containing protein 4 isoform X1	1303	2-1214	9.4e-222	740.0	Poecilia mexicana	48701	cellular organisms;Eukaryota;Opisthokonta;Metazoa;Eumetazoa;Bilateria;Deuterostomia;Chordata;Craniata;Vertebrata;Gnathostomata;Teleostomi;Euteleostomi;Actinopterygii;Actinopteri;Neopterygii;Teleostei;Osteoglossocephalai;Clupeocephala;Euteleosteomorpha;Neoteleostei;Eurypterygia;Ctenosquamata;Acanthomorphata;Euacanthomorphacea;Percomorphaceae;Ovalentaria;Atherinomorphae;Cyprinodontiformes;Cyprinodo…
UniRef100_A0A3B3TJU4	1	A0A3B3TJU4	Zinc finger CCCH-type containing 4	1301	2-1212	3.2e-221	738.2	Poecilia latipinna (sailfin molly)	48699	cellular organisms;Eukaryota;Opisthokonta;Metazoa;Eumetazoa;Bilateria;Deuterostomia;Chordata;Craniata;Vertebrata;Gnathostomata;Teleostomi;Euteleostomi;Actinopterygii;Actinopteri;Neopterygii;Teleostei;Osteoglossocephalai;Clupeocephala;Euteleosteomorpha;Neoteleostei;Eurypterygia;Ctenosquamata;Acanthomorphata;Euacanthomorphacea;Percomorphaceae;Ovalentaria;Atherinomorphae;Cyprinodontiformes;Cyprinodo…
UniRef100_UPI00072EE54F	2	UPI00072EE54F	zinc finger CCCH domain-containing protein 4 isoform X1	1302	2-1213	3.5e-221	738.1	Poecilia latipinna (sailfin molly)	48699	cellular organisms;Eukaryota;Opisthokonta;Metazoa;Eumetazoa;Bilateria;Deuterostomia;Chordata;Craniata;Vertebrata;Gnathostomata;Teleostomi;Euteleostomi;Actinopterygii;Actinopteri;Neopterygii;Teleostei;Osteoglossocephalai;Clupeocephala;Euteleosteomorpha;Neoteleostei;Eurypterygia;Ctenosquamata;Acanthomorphata;Euacanthomorphacea;Percomorphaceae;Ovalentaria;Atherinomorphae;Cyprinodontiformes;Cyprinodo…
UniRef100_UPI0004A3EA42	1	UPI0004A3EA42	zinc finger CCCH domain-containing protein 4	1113	2-839	1.9e-159	533.9	Poecilia reticulata (Guppy) (Acanthophacelus reticulatus)	8081	cellular organisms;Eukaryota;Opisthokonta;Metazoa;Eumetazoa;Bilateria;Deuterostomia;Chordata;Craniata;Vertebrata;Gnathostomata;Teleostomi;Euteleostomi;Actinopterygii;Actinopteri;Neopterygii;Teleostei;Osteoglossocephalai;Clupeocephala;Euteleosteomorpha;Neoteleostei;Eurypterygia;Ctenosquamata;Acanthomorphata;Euacanthomorphacea;Percomorphaceae;Ovalentaria;Atherinomorphae;Cyprinodontiformes;Cyprinodo…
UniRef100_A0A3P9Q4A9	1	A0A3P9Q4A9	Zinc finger CCCH-type containing 4	890	2-669	4.1e-138	463.3	Poecilia reticulata (Guppy) (Acanthophacelus reticulatus)	8081	cellular organisms;Eukaryota;Opisthokonta;Metazoa;Eumetazoa;Bilateria;Deuterostomia;Chordata;Craniata;Vertebrata;Gnathostomata;Teleostomi;Euteleostomi;Actinopterygii;Actinopteri;Neopterygii;Teleostei;Osteoglossocephalai;Clupeocephala;Euteleosteomorpha;Neoteleostei;Eurypterygia;Ctenosquamata;Acanthomorphata;Euacanthomorphacea;Percomorphaceae;Ovalentaria;Atherinomorphae;Cyprinodontiformes;Cyprinodo…
UniRef100_M3ZP17	1	M3ZP17	Zinc finger CCCH-type containing 4	1016	5-928	2e-167	560.3	Xiphophorus maculatus (Southern platyfish) (Platypoecilus maculatus)	8083	cellular organisms;Eukaryota;Opisthokonta;Metazoa;Eumetazoa;Bilateria;Deuterostomia;Chordata;Craniata;Vertebrata;Gnathostomata;Teleostomi;Euteleostomi;Actinopterygii;Actinopteri;Neopterygii;Teleostei;Osteoglossocephalai;Clupeocephala;Euteleosteomorpha;Neoteleostei;Eurypterygia;Ctenosquamata;Acanthomorphata;Euacanthomorphacea;Percomorphaceae;Ovalentaria;Atherinomorphae;Cyprinodontiformes;Cyprinodo…
UniRef100_A0A3P9Q406	1	A0A3P9Q406	Zinc finger CCCH-type containing 4	1049	2-827	9.9e-132	442.2	Poecilia reticulata (Guppy) (Acanthophacelus reticulatus)	8081	cellular organisms;Eukaryota;Opisthokonta;Metazoa;Eumetazoa;Bilateria;Deuterostomia;Chordata;Craniata;Vertebrata;Gnathostomata;Teleostomi;Euteleostomi;Actinopterygii;Actinopteri;Neopterygii;Teleostei;Osteoglossocephalai;Clupeocephala;Euteleosteomorpha;Neoteleostei;Eurypterygia;Ctenosquamata;Acanthomorphata;Euacanthomorphacea;Percomorphaceae;Ovalentaria;Atherinomorphae;Cyprinodontiformes;Cyprinodo…
UniRef100_A0A3P9Q410	1	A0A3P9Q410	Zinc finger CCCH-type containing 4	873	6-669	8.8e-126	422.5	Poecilia reticulata (Guppy) (Acanthophacelus reticulatus)	8081	cellular organisms;Eukaryota;Opisthokonta;Metazoa;Eumetazoa;Bilateria;Deuterostomia;Chordata;Craniata;Vertebrata;Gnathostomata;Teleostomi;Euteleostomi;Actinopterygii;Actinopteri;Neopterygii;Teleostei;Osteoglossocephalai;Clupeocephala;Euteleosteomorpha;Neoteleostei;Eurypterygia;Ctenosquamata;Acanthomorphata;Euacanthomorphacea;Percomorphaceae;Ovalentaria;Atherinomorphae;Cyprinodontiformes;Cyprinodo…
UniRef100_A0A3P9Q549	1	A0A3P9Q549	Zinc finger CCCH-type containing 4	984	5-768	2.6e-126	424.2	Poecilia reticulata (Guppy) (Acanthophacelus reticulatus)	8081	cellular organisms;Eukaryota;Opisthokonta;Metazoa;Eumetazoa;Bilateria;Deuterostomia;Chordata;Craniata;Vertebrata;Gnathostomata;Teleostomi;Euteleostomi;Actinopterygii;Actinopteri;Neopterygii;Teleostei;Osteoglossocephalai;Clupeocephala;Euteleosteomorpha;Neoteleostei;Eurypterygia;Ctenosquamata;Acanthomorphata;Euacanthomorphacea;Percomorphaceae;Ovalentaria;Atherinomorphae;Cyprinodontiformes;Cyprinodo…
UniRef100_UPI000C6D44D4	2	UPI000C6D44D4	zinc finger CCCH domain-containing protein 4 isoform X1	1301	2-1213	1.4e-222	742.8	Xiphophorus maculatus (Southern platyfish) (Platypoecilus maculatus)	8083	cellular organisms;Eukaryota;Opisthokonta;Metazoa;Eumetazoa;Bilateria;Deuterostomia;Chordata;Craniata;Vertebrata;Gnathostomata;Teleostomi;Euteleostomi;Actinopterygii;Actinopteri;Neopterygii;Teleostei;Osteoglossocephalai;Clupeocephala;Euteleosteomorpha;Neoteleostei;Eurypterygia;Ctenosquamata;Acanthomorphata;Euacanthomorphacea;Percomorphaceae;Ovalentaria;Atherinomorphae;Cyprinodontiformes;Cyprinodo…
UniRef100_A0A3B5PND8	2	A0A3B5PND8	Zinc finger CCCH-type containing 4	1065	29-977	4.4e-172	575.7	Xiphophorus maculatus (Southern platyfish) (Platypoecilus maculatus)	8083	cellular organisms;Eukaryota;Opisthokonta;Metazoa;Eumetazoa;Bilateria;Deuterostomia;Chordata;Craniata;Vertebrata;Gnathostomata;Teleostomi;Euteleostomi;Actinopterygii;Actinopteri;Neopterygii;Teleostei;Osteoglossocephalai;Clupeocephala;Euteleosteomorpha;Neoteleostei;Eurypterygia;Ctenosquamata;Acanthomorphata;Euacanthomorphacea;Percomorphaceae;Ovalentaria;Atherinomorphae;Cyprinodontiformes;Cyprinodo…
UniRef100_UPI001016CCD7	1	UPI001016CCD7	zinc finger CCCH domain-containing protein 4 isoform X2	1303	2-1215	4.4e-221	737.8	Xiphophorus couchianus (Monterrey platyfish)	32473	cellular organisms;Eukaryota;Opisthokonta;Metazoa;Eumetazoa;Bilateria;Deuterostomia;Chordata;Craniata;Vertebrata;Gnathostomata;Teleostomi;Euteleostomi;Actinopterygii;Actinopteri;Neopterygii;Teleostei;Osteoglossocephalai;Clupeocephala;Euteleosteomorpha;Neoteleostei;Eurypterygia;Ctenosquamata;Acanthomorphata;Euacanthomorphacea;Percomorphaceae;Ovalentaria;Atherinomorphae;Cyprinodontiformes;Cyprinodo…
UniRef100_UPI00101677B0	2	UPI00101677B0	zinc finger CCCH domain-containing protein 4 isoform X1	1304	2-1216	4.7e-221	737.7	Xiphophorus couchianus (Monterrey platyfish)	32473	cellular organisms;Eukaryota;Opisthokonta;Metazoa;Eumetazoa;Bilateria;Deuterostomia;Chordata;Craniata;Vertebrata;Gnathostomata;Teleostomi;Euteleostomi;Actinopterygii;Actinopteri;Neopterygii;Teleostei;Osteoglossocephalai;Clupeocephala;Euteleosteomorpha;Neoteleostei;Eurypterygia;Ctenosquamata;Acanthomorphata;Euacanthomorphacea;Percomorphaceae;Ovalentaria;Atherinomorphae;Cyprinodontiformes;Cyprinodo…
UniRef100_A0A3B5R8T3	1	A0A3B5R8T3	Zinc finger CCCH-type containing 4	1137	2-1049	4.5e-213	711.3	Xiphophorus maculatus (Southern platyfish) (Platypoecilus maculatus)	8083	cellular organisms;Eukaryota;Opisthokonta;Metazoa;Eumetazoa;Bilateria;Deuterostomia;Chordata;Craniata;Vertebrata;Gnathostomata;Teleostomi;Euteleostomi;Actinopterygii;Actinopteri;Neopterygii;Teleostei;Osteoglossocephalai;Clupeocephala;Euteleosteomorpha;Neoteleostei;Eurypterygia;Ctenosquamata;Acanthomorphata;Euacanthomorphacea;Percomorphaceae;Ovalentaria;Atherinomorphae;Cyprinodontiformes;Cyprinodo…
UniRef100_A0A315UZY5	1	A0A315UZY5	Uncharacterized protein	698	2-663	1.3e-103	349.1	Gambusia affinis (Western mosquitofish) (Heterandria affinis)	33528	cellular organisms;Eukaryota;Opisthokonta;Metazoa;Eumetazoa;Bilateria;Deuterostomia;Chordata;Craniata;Vertebrata;Gnathostomata;Teleostomi;Euteleostomi;Actinopterygii;Actinopteri;Neopterygii;Teleostei;Osteoglossocephalai;Clupeocephala;Euteleosteomorpha;Neoteleostei;Eurypterygia;Ctenosquamata;Acanthomorphata;Euacanthomorphacea;Percomorphaceae;Ovalentaria;Atherinomorphae;Cyprinodontiformes;Cyprinodo…
UniRef100_UPI000B391950	1	UPI000B391950	zinc finger CCCH domain-containing protein 4	1339	2-1252	4.2e-221	737.9	Fundulus heteroclitus (Killifish) (Mummichog)	8078	cellular organisms;Eukaryota;Opisthokonta;Metazoa;Eumetazoa;Bilateria;Deuterostomia;Chordata;Craniata;Vertebrata;Gnathostomata;Teleostomi;Euteleostomi;Actinopterygii;Actinopteri;Neopterygii;Teleostei;Osteoglossocephalai;Clupeocephala;Euteleosteomorpha;Neoteleostei;Eurypterygia;Ctenosquamata;Acanthomorphata;Euacanthomorphacea;Percomorphaceae;Ovalentaria;Atherinomorphae;Cyprinodontiformes;Cyprinodo…
UniRef100_UPI0007425DD9	1	UPI0007425DD9	zinc finger CCCH domain-containing protein 4 isoform X2	1338	2-1249	1.9e-215	719.1	Cyprinodon variegatus (Sheepshead minnow)	28743	cellular organisms;Eukaryota;Opisthokonta;Metazoa;Eumetazoa;Bilateria;Deuterostomia;Chordata;Craniata;Vertebrata;Gnathostomata;Teleostomi;Euteleostomi;Actinopterygii;Actinopteri;Neopterygii;Teleostei;Osteoglossocephalai;Clupeocephala;Euteleosteomorpha;Neoteleostei;Eurypterygia;Ctenosquamata;Acanthomorphata;Euacanthomorphacea;Percomorphaceae;Ovalentaria;Atherinomorphae;Cyprinodontiformes;Cyprinodo…
UniRef100_UPI0007427AB7	1	UPI0007427AB7	zinc finger CCCH domain-containing protein 4 isoform X1	1339	2-1250	2.1e-215	719.0	Cyprinodon variegatus (Sheepshead minnow)	28743	cellular organisms;Eukaryota;Opisthokonta;Metazoa;Eumetazoa;Bilateria;Deuterostomia;Chordata;Craniata;Vertebrata;Gnathostomata;Teleostomi;Euteleostomi;Actinopterygii;Actinopteri;Neopterygii;Teleostei;Osteoglossocephalai;Clupeocephala;Euteleosteomorpha;Neoteleostei;Eurypterygia;Ctenosquamata;Acanthomorphata;Euacanthomorphacea;Percomorphaceae;Ovalentaria;Atherinomorphae;Cyprinodontiformes;Cyprinodo…
UniRef100_A0A3Q2CPF2	1	A0A3Q2CPF2	Zinc finger CCCH-type containing 4	1274	2-1185	2.8e-204	682.2	Cyprinodon variegatus (Sheepshead minnow)	28743	cellular organisms;Eukaryota;Opisthokonta;Metazoa;Eumetazoa;Bilateria;Deuterostomia;Chordata;Craniata;Vertebrata;Gnathostomata;Teleostomi;Euteleostomi;Actinopterygii;Actinopteri;Neopterygii;Teleostei;Osteoglossocephalai;Clupeocephala;Euteleosteomorpha;Neoteleostei;Eurypterygia;Ctenosquamata;Acanthomorphata;Euacanthomorphacea;Percomorphaceae;Ovalentaria;Atherinomorphae;Cyprinodontiformes;Cyprinodo…
UniRef100_UPI0011E9F42A	1	UPI0011E9F42A	zinc finger CCCH domain-containing protein 4 isoform X2	1376	2-1286	2.9e-218	728.5	Archocentrus centrarchus (Flier cichlid) (Cichlasoma centrarchus)	63155	cellular organisms;Eukaryota;Opisthokonta;Metazoa;Eumetazoa;Bilateria;Deuterostomia;Chordata;Craniata;Vertebrata;Gnathostomata;Teleostomi;Euteleostomi;Actinopterygii;Actinopteri;Neopterygii;Teleostei;Osteoglossocephalai;Clupeocephala;Euteleosteomorpha;Neoteleostei;Eurypterygia;Ctenosquamata;Acanthomorphata;Euacanthomorphacea;Percomorphaceae;Ovalentaria;Cichlomorphae;Cichliformes;Cichlidae;New Wor…
UniRef100_UPI0011EA4427	1	UPI0011EA4427	zinc finger CCCH domain-containing protein 4 isoform X1	1377	2-1287	3.1e-218	728.4	Archocentrus centrarchus (Flier cichlid) (Cichlasoma centrarchus)	63155	cellular organisms;Eukaryota;Opisthokonta;Metazoa;Eumetazoa;Bilateria;Deuterostomia;Chordata;Craniata;Vertebrata;Gnathostomata;Teleostomi;Euteleostomi;Actinopterygii;Actinopteri;Neopterygii;Teleostei;Osteoglossocephalai;Clupeocephala;Euteleosteomorpha;Neoteleostei;Eurypterygia;Ctenosquamata;Acanthomorphata;Euacanthomorphacea;Percomorphaceae;Ovalentaria;Cichlomorphae;Cichliformes;Cichlidae;New Wor…
UniRef100_A0A3Q0RK94	1	A0A3Q0RK94	Zinc finger CCCH-type containing 4	898	23-808	7.2e-148	495.6	Amphilophus citrinellus (Midas cichlid) (Cichlasoma citrinellum)	61819	cellular organisms;Eukaryota;Opisthokonta;Metazoa;Eumetazoa;Bilateria;Deuterostomia;Chordata;Craniata;Vertebrata;Gnathostomata;Teleostomi;Euteleostomi;Actinopterygii;Actinopteri;Neopterygii;Teleostei;Osteoglossocephalai;Clupeocephala;Euteleosteomorpha;Neoteleostei;Eurypterygia;Ctenosquamata;Acanthomorphata;Euacanthomorphacea;Percomorphaceae;Ovalentaria;Cichlomorphae;Cichliformes;Cichlidae;New Wor…
UniRef100_UPI000393DF3B	1	UPI000393DF3B	zinc finger CCCH domain-containing protein 4 isoform X2	1380	2-1287	9.5e-218	726.7	Oreochromis niloticus (Nile tilapia) (Tilapia nilotica)	8128	cellular organisms;Eukaryota;Opisthokonta;Metazoa;Eumetazoa;Bilateria;Deuterostomia;Chordata;Craniata;Vertebrata;Gnathostomata;Teleostomi;Euteleostomi;Actinopterygii;Actinopteri;Neopterygii;Teleostei;Osteoglossocephalai;Clupeocephala;Euteleosteomorpha;Neoteleostei;Eurypterygia;Ctenosquamata;Acanthomorphata;Euacanthomorphacea;Percomorphaceae;Ovalentaria;Cichlomorphae;Cichliformes;Cichlidae;African…
UniRef100_I3JLK4	2	I3JLK4	Zinc finger CCCH-type containing 4	1381	2-1288	1e-217	726.6	Oreochromis niloticus (Nile tilapia) (Tilapia nilotica)	8128	cellular organisms;Eukaryota;Opisthokonta;Metazoa;Eumetazoa;Bilateria;Deuterostomia;Chordata;Craniata;Vertebrata;Gnathostomata;Teleostomi;Euteleostomi;Actinopterygii;Actinopteri;Neopterygii;Teleostei;Osteoglossocephalai;Clupeocephala;Euteleosteomorpha;Neoteleostei;Eurypterygia;Ctenosquamata;Acanthomorphata;Euacanthomorphacea;Percomorphaceae;Ovalentaria;Cichlomorphae;Cichliformes;Cichlidae;African…
UniRef100_I3JLK6	1	I3JLK6	Zinc finger CCCH-type containing 4	1245	1-1166	2.5e-215	718.7	Oreochromis niloticus (Nile tilapia) (Tilapia nilotica)	8128	cellular organisms;Eukaryota;Opisthokonta;Metazoa;Eumetazoa;Bilateria;Deuterostomia;Chordata;Craniata;Vertebrata;Gnathostomata;Teleostomi;Euteleostomi;Actinopterygii;Actinopteri;Neopterygii;Teleostei;Osteoglossocephalai;Clupeocephala;Euteleosteomorpha;Neoteleostei;Eurypterygia;Ctenosquamata;Acanthomorphata;Euacanthomorphacea;Percomorphaceae;Ovalentaria;Cichlomorphae;Cichliformes;Cichlidae;African…
UniRef100_I3JLK5	1	I3JLK5	Zinc finger CCCH-type containing 4	1261	1-1168	6.4e-216	720.7	Oreochromis niloticus (Nile tilapia) (Tilapia nilotica)	8128	cellular organisms;Eukaryota;Opisthokonta;Metazoa;Eumetazoa;Bilateria;Deuterostomia;Chordata;Craniata;Vertebrata;Gnathostomata;Teleostomi;Euteleostomi;Actinopterygii;Actinopteri;Neopterygii;Teleostei;Osteoglossocephalai;Clupeocephala;Euteleosteomorpha;Neoteleostei;Eurypterygia;Ctenosquamata;Acanthomorphata;Euacanthomorphacea;Percomorphaceae;Ovalentaria;Cichlomorphae;Cichliformes;Cichlidae;African…
UniRef100_UPI0012BCC4EC	1	UPI0012BCC4EC	zinc finger CCCH domain-containing protein 4 isoform X2	1380	2-1287	1.4e-217	726.2	Oreochromis aureus (Israeli tilapia) (Chromis aureus)	47969	cellular organisms;Eukaryota;Opisthokonta;Metazoa;Eumetazoa;Bilateria;Deuterostomia;Chordata;Craniata;Vertebrata;Gnathostomata;Teleostomi;Euteleostomi;Actinopterygii;Actinopteri;Neopterygii;Teleostei;Osteoglossocephalai;Clupeocephala;Euteleosteomorpha;Neoteleostei;Eurypterygia;Ctenosquamata;Acanthomorphata;Euacanthomorphacea;Percomorphaceae;Ovalentaria;Cichlomorphae;Cichliformes;Cichlidae;African…
UniRef100_UPI0012BBD994	1	UPI0012BBD994	zinc finger CCCH domain-containing protein 4 isoform X1	1381	2-1288	1.5e-217	726.1	Oreochromis aureus (Israeli tilapia) (Chromis aureus)	47969	cellular organisms;Eukaryota;Opisthokonta;Metazoa;Eumetazoa;Bilateria;Deuterostomia;Chordata;Craniata;Vertebrata;Gnathostomata;Teleostomi;Euteleostomi;Actinopterygii;Actinopteri;Neopterygii;Teleostei;Osteoglossocephalai;Clupeocephala;Euteleosteomorpha;Neoteleostei;Eurypterygia;Ctenosquamata;Acanthomorphata;Euacanthomorphacea;Percomorphaceae;Ovalentaria;Cichlomorphae;Cichliformes;Cichlidae;African…
UniRef100_UPI0003AF3E9C	1	UPI0003AF3E9C	zinc finger CCCH domain-containing protein 4	1380	2-1287	1.1e-214	716.6	Pundamilia nyererei	303518	cellular organisms;Eukaryota;Opisthokonta;Metazoa;Eumetazoa;Bilateria;Deuterostomia;Chordata;Craniata;Vertebrata;Gnathostomata;Teleostomi;Euteleostomi;Actinopterygii;Actinopteri;Neopterygii;Teleostei;Osteoglossocephalai;Clupeocephala;Euteleosteomorpha;Neoteleostei;Eurypterygia;Ctenosquamata;Acanthomorphata;Euacanthomorphacea;Percomorphaceae;Ovalentaria;Cichlomorphae;Cichliformes;Cichlidae;African…
UniRef100_UPI0006C96B0E	1	UPI0006C96B0E	zinc finger CCCH domain-containing protein 4 isoform X4	1380	2-1287	1.5e-214	716.1	Haplochromis burtoni (Burton's mouthbrooder) (Chromis burtoni)	8153	cellular organisms;Eukaryota;Opisthokonta;Metazoa;Eumetazoa;Bilateria;Deuterostomia;Chordata;Craniata;Vertebrata;Gnathostomata;Teleostomi;Euteleostomi;Actinopterygii;Actinopteri;Neopterygii;Teleostei;Osteoglossocephalai;Clupeocephala;Euteleosteomorpha;Neoteleostei;Eurypterygia;Ctenosquamata;Acanthomorphata;Euacanthomorphacea;Percomorphaceae;Ovalentaria;Cichlomorphae;Cichliformes;Cichlidae;African…
UniRef100_UPI0006C95BDF	1	UPI0006C95BDF	zinc finger CCCH domain-containing protein 4 isoform X2	1397	43-1304	9.7e-214	713.5	Haplochromis burtoni (Burton's mouthbrooder) (Chromis burtoni)	8153	cellular organisms;Eukaryota;Opisthokonta;Metazoa;Eumetazoa;Bilateria;Deuterostomia;Chordata;Craniata;Vertebrata;Gnathostomata;Teleostomi;Euteleostomi;Actinopterygii;Actinopteri;Neopterygii;Teleostei;Osteoglossocephalai;Clupeocephala;Euteleosteomorpha;Neoteleostei;Eurypterygia;Ctenosquamata;Acanthomorphata;Euacanthomorphacea;Percomorphaceae;Ovalentaria;Cichlomorphae;Cichliformes;Cichlidae;African…
UniRef100_UPI0006C941CC	2	UPI0006C941CC	zinc finger CCCH domain-containing protein 4 isoform X1	1398	43-1305	1e-213	713.4	Haplochromis burtoni (Burton's mouthbrooder) (Chromis burtoni)	8153	cellular organisms;Eukaryota;Opisthokonta;Metazoa;Eumetazoa;Bilateria;Deuterostomia;Chordata;Craniata;Vertebrata;Gnathostomata;Teleostomi;Euteleostomi;Actinopterygii;Actinopteri;Neopterygii;Teleostei;Osteoglossocephalai;Clupeocephala;Euteleosteomorpha;Neoteleostei;Eurypterygia;Ctenosquamata;Acanthomorphata;Euacanthomorphacea;Percomorphaceae;Ovalentaria;Cichlomorphae;Cichliformes;Cichlidae;African…
UniRef100_UPI0003BCD659	1	UPI0003BCD659	zinc finger CCCH domain-containing protein 4 isoform X3	1390	39-1297	9.6e-214	713.5	Haplochromis burtoni (Burton's mouthbrooder) (Chromis burtoni)	8153	cellular organisms;Eukaryota;Opisthokonta;Metazoa;Eumetazoa;Bilateria;Deuterostomia;Chordata;Craniata;Vertebrata;Gnathostomata;Teleostomi;Euteleostomi;Actinopterygii;Actinopteri;Neopterygii;Teleostei;Osteoglossocephalai;Clupeocephala;Euteleosteomorpha;Neoteleostei;Eurypterygia;Ctenosquamata;Acanthomorphata;Euacanthomorphacea;Percomorphaceae;Ovalentaria;Cichlomorphae;Cichliformes;Cichlidae;African…
UniRef100_A0A3Q2WJK8	1	A0A3Q2WJK8	Zinc finger CCCH-type containing 4	1271	6-1178	7.6e-198	660.9	Haplochromis burtoni (Burton's mouthbrooder) (Chromis burtoni)	8153	cellular organisms;Eukaryota;Opisthokonta;Metazoa;Eumetazoa;Bilateria;Deuterostomia;Chordata;Craniata;Vertebrata;Gnathostomata;Teleostomi;Euteleostomi;Actinopterygii;Actinopteri;Neopterygii;Teleostei;Osteoglossocephalai;Clupeocephala;Euteleosteomorpha;Neoteleostei;Eurypterygia;Ctenosquamata;Acanthomorphata;Euacanthomorphacea;Percomorphaceae;Ovalentaria;Cichlomorphae;Cichliformes;Cichlidae;African…
UniRef100_A0A3B4H1V1	1	A0A3B4H1V1	Zinc finger CCCH-type containing 4	1264	6-1171	1.3e-197	660.1	Pundamilia nyererei	303518	cellular organisms;Eukaryota;Opisthokonta;Metazoa;Eumetazoa;Bilateria;Deuterostomia;Chordata;Craniata;Vertebrata;Gnathostomata;Teleostomi;Euteleostomi;Actinopterygii;Actinopteri;Neopterygii;Teleostei;Osteoglossocephalai;Clupeocephala;Euteleosteomorpha;Neoteleostei;Eurypterygia;Ctenosquamata;Acanthomorphata;Euacanthomorphacea;Percomorphaceae;Ovalentaria;Cichlomorphae;Cichliformes;Cichlidae;African…
UniRef100_UPI0003EC54B5	1	UPI0003EC54B5	zinc finger CCCH domain-containing protein 4-like	1381	2-1288	6e-214	714.2	Neolamprologus brichardi (Fairy cichlid) (Lamprologus brichardi)	32507	cellular organisms;Eukaryota;Opisthokonta;Metazoa;Eumetazoa;Bilateria;Deuterostomia;Chordata;Craniata;Vertebrata;Gnathostomata;Teleostomi;Euteleostomi;Actinopterygii;Actinopteri;Neopterygii;Teleostei;Osteoglossocephalai;Clupeocephala;Euteleosteomorpha;Neoteleostei;Eurypterygia;Ctenosquamata;Acanthomorphata;Euacanthomorphacea;Percomorphaceae;Ovalentaria;Cichlomorphae;Cichliformes;Cichlidae;African…
UniRef100_A0A3Q4MWR5	1	A0A3Q4MWR5	Zinc finger CCCH-type containing 4	1366	2-1273	2e-205	686.0	Neolamprologus brichardi (Fairy cichlid) (Lamprologus brichardi)	32507	cellular organisms;Eukaryota;Opisthokonta;Metazoa;Eumetazoa;Bilateria;Deuterostomia;Chordata;Craniata;Vertebrata;Gnathostomata;Teleostomi;Euteleostomi;Actinopterygii;Actinopteri;Neopterygii;Teleostei;Osteoglossocephalai;Clupeocephala;Euteleosteomorpha;Neoteleostei;Eurypterygia;Ctenosquamata;Acanthomorphata;Euacanthomorphacea;Percomorphaceae;Ovalentaria;Cichlomorphae;Cichliformes;Cichlidae;African…
UniRef100_UPI0003297BD6	1	UPI0003297BD6	zinc finger CCCH domain-containing protein 4 isoform X2	1380	2-1287	2.7e-214	715.3	Maylandia zebra (zebra mbuna)	106582	cellular organisms;Eukaryota;Opisthokonta;Metazoa;Eumetazoa;Bilateria;Deuterostomia;Chordata;Craniata;Vertebrata;Gnathostomata;Teleostomi;Euteleostomi;Actinopterygii;Actinopteri;Neopterygii;Teleostei;Osteoglossocephalai;Clupeocephala;Euteleosteomorpha;Neoteleostei;Eurypterygia;Ctenosquamata;Acanthomorphata;Euacanthomorphacea;Percomorphaceae;Ovalentaria;Cichlomorphae;Cichliformes;Cichlidae;African…
UniRef100_UPI00032A00E2	2	UPI00032A00E2	zinc finger CCCH domain-containing protein 4 isoform X1	1381	2-1288	2.9e-214	715.2	Maylandia zebra (zebra mbuna)	106582	cellular organisms;Eukaryota;Opisthokonta;Metazoa;Eumetazoa;Bilateria;Deuterostomia;Chordata;Craniata;Vertebrata;Gnathostomata;Teleostomi;Euteleostomi;Actinopterygii;Actinopteri;Neopterygii;Teleostei;Osteoglossocephalai;Clupeocephala;Euteleosteomorpha;Neoteleostei;Eurypterygia;Ctenosquamata;Acanthomorphata;Euacanthomorphacea;Percomorphaceae;Ovalentaria;Cichlomorphae;Cichliformes;Cichlidae;African…
UniRef100_UPI000E402868	2	UPI000E402868	zinc finger CCCH domain-containing protein 4 isoform X1	1381	2-1288	3.1e-214	715.1	Astatotilapia calliptera (Eastern happy) (Chromis callipterus)	8154	cellular organisms;Eukaryota;Opisthokonta;Metazoa;Eumetazoa;Bilateria;Deuterostomia;Chordata;Craniata;Vertebrata;Gnathostomata;Teleostomi;Euteleostomi;Actinopterygii;Actinopteri;Neopterygii;Teleostei;Osteoglossocephalai;Clupeocephala;Euteleosteomorpha;Neoteleostei;Eurypterygia;Ctenosquamata;Acanthomorphata;Euacanthomorphacea;Percomorphaceae;Ovalentaria;Cichlomorphae;Cichliformes;Cichlidae;African…
UniRef100_UPI000E410CFD	1	UPI000E410CFD	zinc finger CCCH domain-containing protein 4 isoform X2	1380	2-1287	2.8e-214	715.2	Astatotilapia calliptera (Eastern happy) (Chromis callipterus)	8154	cellular organisms;Eukaryota;Opisthokonta;Metazoa;Eumetazoa;Bilateria;Deuterostomia;Chordata;Craniata;Vertebrata;Gnathostomata;Teleostomi;Euteleostomi;Actinopterygii;Actinopteri;Neopterygii;Teleostei;Osteoglossocephalai;Clupeocephala;Euteleosteomorpha;Neoteleostei;Eurypterygia;Ctenosquamata;Acanthomorphata;Euacanthomorphacea;Percomorphaceae;Ovalentaria;Cichlomorphae;Cichliformes;Cichlidae;African…
UniRef100_A0A3P9DEB3	1	A0A3P9DEB3	Zinc finger CCCH-type containing 4	1304	6-1211	3.8e-197	658.6	Maylandia zebra (zebra mbuna)	106582	cellular organisms;Eukaryota;Opisthokonta;Metazoa;Eumetazoa;Bilateria;Deuterostomia;Chordata;Craniata;Vertebrata;Gnathostomata;Teleostomi;Euteleostomi;Actinopterygii;Actinopteri;Neopterygii;Teleostei;Osteoglossocephalai;Clupeocephala;Euteleosteomorpha;Neoteleostei;Eurypterygia;Ctenosquamata;Acanthomorphata;Euacanthomorphacea;Percomorphaceae;Ovalentaria;Cichlomorphae;Cichliformes;Cichlidae;African…
UniRef100_A0A3P8Q8D1	1	A0A3P8Q8D1	Zinc finger CCCH-type containing 4	1304	6-1211	4e-197	658.5	Astatotilapia calliptera (Eastern happy) (Chromis callipterus)	8154	cellular organisms;Eukaryota;Opisthokonta;Metazoa;Eumetazoa;Bilateria;Deuterostomia;Chordata;Craniata;Vertebrata;Gnathostomata;Teleostomi;Euteleostomi;Actinopterygii;Actinopteri;Neopterygii;Teleostei;Osteoglossocephalai;Clupeocephala;Euteleosteomorpha;Neoteleostei;Eurypterygia;Ctenosquamata;Acanthomorphata;Euacanthomorphacea;Percomorphaceae;Ovalentaria;Cichlomorphae;Cichliformes;Cichlidae;African…
UniRef100_UPI0010427441	1	UPI0010427441	zinc finger CCCH domain-containing protein 4 isoform X2	1381	2-1290	8.2e-229	763.3	Parambassis ranga (Indian glassy fish)	210632	cellular organisms;Eukaryota;Opisthokonta;Metazoa;Eumetazoa;Bilateria;Deuterostomia;Chordata;Craniata;Vertebrata;Gnathostomata;Teleostomi;Euteleostomi;Actinopterygii;Actinopteri;Neopterygii;Teleostei;Osteoglossocephalai;Clupeocephala;Euteleosteomorpha;Neoteleostei;Eurypterygia;Ctenosquamata;Acanthomorphata;Euacanthomorphacea;Percomorphaceae;Ovalentaria;Ovalentaria incertae sedis;Ambassidae;Paramb…
[truncated: 723 more rows]
