# Supplementary material for: ZC3H4 restricts non-coding transcription in human cells
Source: eLife. 2021 Apr 29;10:e67305. doi: 10.7554/eLife.67305 (PMC8137146; doi:10.7554/eLife.67305)
Supplement: Supplementary file 3. [file elife-67305-supp3.xlsx]

## Sheet: scaled_genes_sorted
	gene_id	gene_name	c30.log2	z4.log2
	ENSG00000143515	ATP8B2	0.0641136	5.04201
	ENSG00000174943	KCTD13	0.164559	3.73181
	ENSG00000130382	MLLT1	3.93226	3.55198
	ENSG00000005812	FBXL3	-0.401546	3.51576
	ENSG00000112234	FBXL4	-0.231147	3.4449
	ENSG00000131238	PPT1	0.366805	3.41236
	ENSG00000116337	AMPD2	4.28253	3.3436
	ENSG00000167978	SRRM2	2.28935	3.30891
	ENSG00000141526	SLC16A3	0.873119	3.27302
	ENSG00000149636	DSN1	1.57251	3.26878
	ENSG00000277224	H2BC7	2.1184	3.11196
	ENSG00000255112	CHMP1B	2.41138	3.01755
	ENSG00000178971	CTC1	1.1065	2.98297
	ENSG00000173456	RNF26	0.980022	2.88542
	ENSG00000169564	PCBP1	3.00486	2.84987
	ENSG00000067177	PHKA1	0.3674	2.84846
	ENSG00000188559	RALGAPA2	2.47281	2.8439
	ENSG00000100804	PSMB5	2.66787	2.84147
	ENSG00000101188	NTSR1	2.45006	2.83225
	ENSG00000100347	SAMM50	-1.55917	2.81737
	ENSG00000136997	MYC	1.34809	2.75288
	ENSG00000119943	PYROXD2	6.01574	2.69255
	ENSG00000164818	DNAAF5	2.27551	2.66987
	ENSG00000176102	CSTF3	-0.64103	2.64088
	ENSG00000185130	H2BC13	3.02066	2.63659
	ENSG00000197457	STMN3	2.557	2.63521
	ENSG00000285854	AC010197.2	2.66019	2.61203
	ENSG00000074582	BCS1L	1.93882	2.59314
	ENSG00000139624	CERS5	0.110829	2.54833
	ENSG00000133466	C1QTNF6	1.62845	2.41748
	ENSG00000164087	POC1A	1.59837	2.41647
	ENSG00000026036	RTEL1-TNFRSF6B	1.12229	2.40118
	ENSG00000243509	TNFRSF6B	1.12229	2.40118
	ENSG00000141736	ERBB2	-2.31437	2.37823
	ENSG00000125319	HROB	1.28749	2.37124
	ENSG00000126088	UROD	1.07049	2.35738
	ENSG00000100243	CYB5R3	2.3462	2.32976
	ENSG00000148671	ADIRF	0.293633	2.32378
	ENSG00000173611	SCAI	2.71542	2.32101
	ENSG00000197142	ACSL5	0.725435	2.30749
	ENSG00000160949	TONSL	-0.14505	2.29546
	ENSG00000164916	FOXK1	5.40077	2.25671
	ENSG00000136098	NEK3	3.13105	2.25435
	ENSG00000101849	TBL1X	1.46214	2.24603
	ENSG00000129354	AP1M2	2.79466	2.23306
	ENSG00000152944	MED21	0.516605	2.22807
	ENSG00000138074	SLC5A6	1.89155	2.22218
	ENSG00000101189	MRGBP	2.01434	2.20133
	ENSG00000175220	ARHGAP1	2.9223	2.18817
	ENSG00000109320	NFKB1	1.43396	2.18288
	ENSG00000255823	MTRNR2L8	1.50259	2.16705
	ENSG00000127946	HIP1	1.68181	2.16177
	ENSG00000105856	HBP1	1.93051	2.16135
	ENSG00000145244	CORIN	1.74779	2.13325
	ENSG00000144597	EAF1	-1.4761	2.12474
	ENSG00000196363	WDR5	3.98363	2.11963
	ENSG00000116984	MTR	0.833525	2.08477
	ENSG00000206527	HACD2	0.574834	2.0797
	ENSG00000115109	EPB41L5	1.24804	2.06911
	ENSG00000151065	DCP1B	1.16916	2.06641
	ENSG00000111775	COX6A1	1.04331	2.05768
	ENSG00000152464	RPP38	-0.326037	2.04961
	ENSG00000173267	SNCG	0.825429	2.04742
	ENSG00000183530	PRR14L	2.22239	2.04243
	ENSG00000123213	NLN	1.5734	2.02867
	ENSG00000186106	ANKRD46	0.680185	2.01494
1	ENSG00000136715	SAP130	2.40826	2.00262
2	ENSG00000170348	TMED10	1.44975	1.99855
3	ENSG00000128591	FLNC	2.14559	1.99525
4	ENSG00000091136	LAMB1	0.0175449	1.98218
5	ENSG00000189308	LIN54	-0.845948	1.96748
6	ENSG00000165861	ZFYVE1	0.136669	1.95261
7	ENSG00000204977	TRIM13	-0.303208	1.95152
8	ENSG00000171466	ZNF562	1.85376	1.95123
9	ENSG00000100461	RBM23	1.41492	1.94371
10	ENSG00000242028	HYPK	-0.412865	1.94355
11	ENSG00000058729	RIOK2	1.49472	1.93886
12	ENSG00000197948	FCHSD1	2.80242	1.93816
13	ENSG00000146066	HIGD2A	0.900314	1.92791
14	ENSG00000169032	MAP2K1	2.31465	1.92341
15	ENSG00000189143	CLDN4	3.86864	1.92179
16	ENSG00000161203	AP2M1	3.49299	1.91961
17	ENSG00000136261	BZW2	0.609982	1.90404
18	ENSG00000284989	AL451062.4	1.9097	1.89983
19	ENSG00000111674	ENO2	2.09754	1.89937
20	ENSG00000172888	ZNF621	2.27852	1.8983
21	ENSG00000073169	SELENOO	1.38343	1.878
22	ENSG00000136279	DBNL	0.78066	1.8762
23	ENSG00000165905	LARGE2	2.673	1.8731
24	ENSG00000142798	HSPG2	4.01859	1.87256
25	ENSG00000184840	TMED9	0.0401967	1.85853
26	ENSG00000104964	TLE5	1.41183	1.85798
27	ENSG00000173402	DAG1	0.693024	1.853
28	ENSG00000100911	PSME2	2.39537	1.84833
29	ENSG00000183077	AFMID	1.77229	1.84119
30	ENSG00000166483	WEE1	2.7394	1.83739
31	ENSG00000092964	DPYSL2	-0.4956	1.82788
32	ENSG00000089351	GRAMD1A	0.700544	1.82526
33	ENSG00000169490	TM2D2	2.13815	1.82348
34	ENSG00000136542	GALNT5	3.70058	1.80161
35	ENSG00000185222	TCEAL9	2.60157	1.80116
36	ENSG00000117595	IRF6	0.951668	1.79419
37	ENSG00000286522	H3C2	-0.996674	1.7941
38	ENSG00000139514	SLC7A1	1.8517	1.78331
39	ENSG00000166123	GPT2	1.77505	1.78289
40	ENSG00000147894	C9orf72	1.52975	1.78041
41	ENSG00000107738	VSIR	2.1953	1.78006
42	ENSG00000103187	COTL1	2.94599	1.7739
43	ENSG00000101311	FERMT1	0.571876	1.77351
44	ENSG00000162851	TFB2M	2.05709	1.7553
45	ENSG00000117318	ID3	3.42892	1.75279
46	ENSG00000031698	SARS1	1.87327	1.74965
47	ENSG00000189403	HMGB1	1.3241	1.74559
48	ENSG00000140553	UNC45A	2.37407	1.74197
49	ENSG00000092094	OSGEP	0.915407	1.74078
50	ENSG00000132323	ILKAP	2.85793	1.73513
51	ENSG00000278705	H4C2	-0.569548	1.72941
52	ENSG00000173715	C11orf80	-1.5695	1.72879
53	ENSG00000075239	ACAT1	1.85937	1.71722
54	ENSG00000171720	HDAC3	1.77278	1.71435
55	ENSG00000106077	ABHD11	1.22625	1.71348
56	ENSG00000119718	EIF2B2	0.109277	1.70618
57	ENSG00000186468	RPS23	2.71249	1.68862
58	ENSG00000147679	UTP23	2.2761	1.68372
59	ENSG00000175550	DRAP1	2.03997	1.68344
60	ENSG00000183283	DAZAP2	0.455741	1.67461
61	ENSG00000125148	MT2A	2.50204	1.66959
62	ENSG00000136982	DSCC1	1.29482	1.66627
63	ENSG00000140471	LINS1	0.327034	1.66623
64	ENSG00000130299	GTPBP3	2.98588	1.66195
65	ENSG00000141429	GALNT1	0.643122	1.66147
66	ENSG00000213780	GTF2H4	-1.07819	1.65906
67	ENSG00000172167	MTBP	-0.255614	1.65708
68	ENSG00000183598	H3C13	-0.195549	1.65448
69	ENSG00000175315	CST6	1.47348	1.64636
70	ENSG00000103479	RBL2	1.76849	1.64437
71	ENSG00000162377	COA7	1.78835	1.6432
72	ENSG00000196367	TRRAP	0.40007	1.64144
73	ENSG00000149418	ST14	3.24001	1.64078
74	ENSG00000177469	CAVIN1	0.255101	1.63831
75	ENSG00000159069	FBXW5	1.14317	1.63517
76	ENSG00000268361	L34079.1	-0.48552	1.62964
77	ENSG00000105755	ETHE1	2.43654	1.62554
78	ENSG00000213341	CHUK	2.33873	1.6245
79	ENSG00000198931	APRT	-0.225457	1.62189
80	ENSG00000100348	TXN2	1.91881	1.61121
81	ENSG00000110090	CPT1A	-0.449888	1.61097
82	ENSG00000167526	RPL13	0.188533	1.60926
83	ENSG00000171223	JUNB	3.44816	1.60907
84	ENSG00000197858	GPAA1	1.44899	1.60402
85	ENSG00000055163	CYFIP2	-0.636593	1.60116
86	ENSG00000168612	ZSWIM1	2.89007	1.59884
87	ENSG00000134013	LOXL2	1.4772	1.59458
88	ENSG00000149657	LSM14B	2.1061	1.5926
89	ENSG00000087077	TRIP6	2.34783	1.59022
90	ENSG00000198373	WWP2	2.80145	1.58508
91	ENSG00000147813	NAPRT	2.34421	1.57856
92	ENSG00000081026	MAGI3	0.318319	1.57823
93	ENSG00000204406	MBD5	0.0776478	1.57174
94	ENSG00000163346	PBXIP1	4.38738	1.56215
95	ENSG00000112367	FIG4	2.20511	1.56136
96	ENSG00000125520	SLC2A4RG	1.11082	1.55798
97	ENSG00000170439	METTL7B	-0.173724	1.55755
98	ENSG00000198752	CDC42BPB	2.45596	1.5572
99	ENSG00000198105	ZNF248	0.0472776	1.55615
100	ENSG00000273542	H4C12	0.381233	1.55343
101	ENSG00000168298	H1-4	-1.63365	1.55339
102	ENSG00000109736	MFSD10	3.36104	1.55233
103	ENSG00000198252	STYX	1.83716	1.55117
104	ENSG00000241484	ARHGAP8	1.84282	1.54811
105	ENSG00000172340	SUCLG2	-0.0767067	1.54421
106	ENSG00000257923	CUX1	2.91578	1.54233
107	ENSG00000130175	PRKCSH	2.1757	1.54069
108	ENSG00000067208	EVI5	1.76504	1.53926
109	ENSG00000124782	RREB1	1.70124	1.53922
110	ENSG00000131143	COX4I1	1.67258	1.53868
111	ENSG00000166228	PCBD1	1.16676	1.53722
112	ENSG00000108651	UTP6	1.39544	1.53654
113	ENSG00000103037	SETD6	0.0639725	1.5348
114	ENSG00000161800	RACGAP1	0.826736	1.53092
115	ENSG00000111843	TMEM14C	1.22287	1.53001
116	ENSG00000138867	GUCD1	3.94882	1.52793
117	ENSG00000122126	OCRL	0.969266	1.52712
118	ENSG00000205544	TMEM256	0.614914	1.52319
119	ENSG00000079134	THOC1	0.83338	1.51717
120	ENSG00000025293	PHF20	1.40102	1.51709
121	ENSG00000102900	NUP93	-0.836428	1.51487
122	ENSG00000198198	SZT2	0.589885	1.51471
123	ENSG00000153037	SRP19	-0.151086	1.50167
124	ENSG00000166411	IDH3A	0.297789	1.49966
125	ENSG00000138834	MAPK8IP3	0.686358	1.49778
126	ENSG00000130309	COLGALT1	0.843046	1.49612
127	ENSG00000099977	DDT	1.08964	1.49467
128	ENSG00000122861	PLAU	2.66079	1.49339
129	ENSG00000167608	TMC4	0.587621	1.4895
130	ENSG00000139496	NUP58	1.23898	1.48347
131	ENSG00000091157	WDR7	0.345578	1.48193
132	ENSG00000140995	DEF8	3.30316	1.4808
133	ENSG00000148484	RSU1	0.227484	1.47879
134	ENSG00000118965	WDR35	2.28461	1.47596
135	ENSG00000123130	ACOT9	2.2771	1.47552
136	ENSG00000205352	PRR13	1.21515	1.47421
137	ENSG00000285762	AC253536.7	1.0462	1.47221
138	ENSG00000171159	C9orf16	-2.04436	1.47213
139	ENSG00000215421	ZNF407	2.41602	1.46937
140	ENSG00000178950	GAK	3.2153	1.46351
141	ENSG00000113368	LMNB1	1.44235	1.46151
142	ENSG00000110344	UBE4A	1.67272	1.46061
143	ENSG00000174748	RPL15	-0.0275774	1.4601
144	ENSG00000196652	ZKSCAN5	1.43679	1.46007
145	ENSG00000177192	PUS1	0.1276	1.45875
146	ENSG00000142252	GEMIN7	0.455468	1.45802
147	ENSG00000175416	CLTB	1.44154	1.45265
148	ENSG00000145916	RMND5B	0.59938	1.44617
149	ENSG00000173681	BCLAF3	1.97499	1.44601
150	ENSG00000166337	TAF10	1.38547	1.44307
151	ENSG00000146386	ABRACL	3.60137	1.44077
152	ENSG00000189060	H1-0	1.86514	1.4377
153	ENSG00000134590	RTL8C	0.455481	1.43698
154	ENSG00000142396	ERVK3-1	2.27884	1.43599
155	ENSG00000100300	TSPO	0.137962	1.43317
156	ENSG00000002834	LASP1	3.0573	1.43202
157	ENSG00000132570	PCBD2	-1.97898	1.42622
158	ENSG00000082068	WDR70	-0.733882	1.42573
159	ENSG00000022556	NLRP2	0.88229	1.42171
160	ENSG00000013364	MVP	2.62092	1.42105
161	ENSG00000110429	FBXO3	1.01383	1.41887
162	ENSG00000119899	SLC17A5	0.377699	1.41831
163	ENSG00000141905	NFIC	2.07249	1.41514
164	ENSG00000186104	CYP2R1	-0.151574	1.41014
165	ENSG00000111642	CHD4	2.02161	1.4095
166	ENSG00000135336	ORC3	1.37091	1.40624
167	ENSG00000065183	WDR3	0.205069	1.39638
168	ENSG00000149016	TUT1	2.36965	1.39303
169	ENSG00000163898	LIPH	1.79883	1.39283
170	ENSG00000095066	HOOK2	2.61531	1.39021
171	ENSG00000124571	XPO5	1.0751	1.38566
172	ENSG00000166526	ZNF3	0.212087	1.38551
173	ENSG00000102265	TIMP1	2.36585	1.38504
174	ENSG00000160953	PWWP3A	2.50152	1.3838
175	ENSG00000213672	NCKIPSD	1.81788	1.38179
176	ENSG00000198369	SPRED2	2.21809	1.37899
177	ENSG00000104375	STK3	0.247998	1.3783
178	ENSG00000142089	IFITM3	3.15778	1.37672
179	ENSG00000135541	AHI1	1.08688	1.37285
180	ENSG00000167114	SLC27A4	1.12544	1.37192
181	ENSG00000135441	BLOC1S1	0.0729181	1.3706
182	ENSG00000140264	SERF2	-0.382449	1.37033
183	ENSG00000170638	TRABD	0.54894	1.36853
184	ENSG00000203965	EFCAB7	1.7436	1.36674
185	ENSG00000104427	ZC2HC1A	1.59441	1.36633
186	ENSG00000135968	GCC2	2.11184	1.36436
187	ENSG00000185722	ANKFY1	0.982595	1.36371
188	ENSG00000151466	SCLT1	-0.694242	1.3604
189	ENSG00000149136	SSRP1	3.20491	1.35886
190	ENSG00000175727	MLXIP	4.78842	1.35632
191	ENSG00000066855	MTFR1	0.815034	1.35609
192	ENSG00000175376	EIF1AD	2.69053	1.3522
193	ENSG00000219545	UMAD1	-1.72333	1.3515
194	ENSG00000109618	SEPSECS	2.78374	1.35043
195	ENSG00000139613	SMARCC2	0.840546	1.3504
196	ENSG00000165819	METTL3	2.67608	1.35008
197	ENSG00000115145	STAM2	-0.135831	1.34944
198	ENSG00000161016	RPL8	2.55088	1.34886
199	ENSG00000102178	UBL4A	-0.843929	1.3475
200	ENSG00000214941	ZSWIM7	1.28911	1.34495
201	ENSG00000125817	CENPB	2.07091	1.34476
202	ENSG00000053371	AKR7A2	0.229776	1.34083
203	ENSG00000114771	AADAC	1.0066	1.33911
204	ENSG00000213977	TAX1BP3	0.514156	1.33854
205	ENSG00000178802	MPI	2.5027	1.33579
206	ENSG00000113615	SEC24A	1.99043	1.32967
207	ENSG00000049759	NEDD4L	1.54232	1.32825
208	ENSG00000258052	AC025263.2	2.39129	1.32807
209	ENSG00000122140	MRPS2	2.52104	1.32738
210	ENSG00000131966	ACTR10	-0.273268	1.32717
211	ENSG00000250479	CHCHD10	0.911065	1.32694
212	ENSG00000179115	FARSA	1.66907	1.32644
213	ENSG00000170234	PWWP2A	1.21953	1.32413
214	ENSG00000178252	WDR6	2.37381	1.32363
215	ENSG00000109929	SC5D	2.21694	1.32301
216	ENSG00000116786	PLEKHM2	4.40925	1.32117
217	ENSG00000169715	MT1E	0.382685	1.32019
218	ENSG00000181392	SYNE4	1.13674	1.31773
219	ENSG00000168256	NKIRAS2	3.15529	1.3098
220	ENSG00000124659	TBCC	3.29298	1.30498
221	ENSG00000150760	DOCK1	0.755496	1.30395
222	ENSG00000131652	THOC6	3.61776	1.30303
223	ENSG00000123374	CDK2	2.44517	1.29851
224	ENSG00000142731	PLK4	2.45304	1.29791
225	ENSG00000095485	CWF19L1	2.94325	1.29519
226	ENSG00000131462	TUBG1	2.38119	1.29519
227	ENSG00000009844	VTA1	-0.121164	1.29049
228	ENSG00000135596	MICAL1	2.72461	1.29001
229	ENSG00000134897	BIVM	1.8483	1.28987
230	ENSG00000104812	GYS1	-0.209004	1.28845
231	ENSG00000074319	TSG101	0.356903	1.28542
232	ENSG00000177728	TMEM94	0.716056	1.28048
233	ENSG00000164022	AIMP1	1.45225	1.27818
234	ENSG00000105723	GSK3A	2.59554	1.27761
235	ENSG00000031823	RANBP3	2.90098	1.27653
236	ENSG00000108106	UBE2S	0.903552	1.27388
237	ENSG00000112249	ASCC3	1.18242	1.27287
238	ENSG00000124275	MTRR	-0.341695	1.27187
239	ENSG00000131051	RBM39	0.490671	1.27152
240	ENSG00000053770	AP5M1	1.12393	1.27151
241	ENSG00000113387	SUB1	1.76157	1.27008
242	ENSG00000165417	GTF2A1	0.849273	1.2677
243	ENSG00000111669	TPI1	1.00187	1.2671
244	ENSG00000141522	ARHGDIA	3.18553	1.2666
245	ENSG00000105401	CDC37	2.98049	1.26448
246	ENSG00000152465	NMT2	1.01947	1.26335
247	ENSG00000100097	LGALS1	2.19882	1.26328
248	ENSG00000137310	TCF19	-0.624054	1.26143
249	ENSG00000158623	COPG2	1.7783	1.26049
250	ENSG00000177463	NR2C2	0.753637	1.25992
251	ENSG00000163029	SMC6	1.55183	1.25939
252	ENSG00000024422	EHD2	0.929101	1.25729
253	ENSG00000120314	WDR55	1.32528	1.25697
254	ENSG00000135632	SMYD5	1.42474	1.25677
255	ENSG00000120885	CLU	1.39286	1.25667
256	ENSG00000102007	PLP2	2.29391	1.2541
257	ENSG00000141562	NARF	-0.0299962	1.25083
258	ENSG00000117625	RCOR3	1.49266	1.24725
259	ENSG00000159214	CCDC24	0.847351	1.24492
260	ENSG00000119688	ABCD4	0.00922195	1.24337
261	ENSG00000155959	VBP1	2.5075	1.24325
262	ENSG00000139645	ANKRD52	2.29004	1.24205
263	ENSG00000105700	KXD1	2.52211	1.24102
264	ENSG00000132824	SERINC3	0.633579	1.23776
265	ENSG00000010292	NCAPD2	2.86642	1.2339
266	ENSG00000159459	UBR1	2.783	1.23138
267	ENSG00000166171	DPCD	1.27408	1.23022
268	ENSG00000114770	ABCC5	1.45617	1.22982
269	ENSG00000198791	CNOT7	0.821933	1.22838
270	ENSG00000156958	GALK2	-0.0824315	1.22788
271	ENSG00000102897	LYRM1	2.20925	1.22728
272	ENSG00000109066	TMEM104	3.11229	1.22548
273	ENSG00000148362	PAXX	2.18309	1.22454
274	ENSG00000196866	H2AC7	-0.242263	1.22306
275	ENSG00000197312	DDI2	1.76853	1.22206
276	ENSG00000163714	U2SURP	1.10208	1.22176
277	ENSG00000163001	CFAP36	-0.412702	1.22154
278	ENSG00000163382	NAXE	-0.766542	1.21968
279	ENSG00000071054	MAP4K4	1.11413	1.21896
280	ENSG00000275674	AC091167.6	-2.65378	1.21719
281	ENSG00000176834	VSIG10	0.786387	1.21491
282	ENSG00000065154	OAT	1.9884	1.21267
283	ENSG00000159840	ZYX	1.29151	1.21241
284	ENSG00000147400	CETN2	1.01437	1.21189
285	ENSG00000173113	TRMT112	-0.209175	1.20969
286	ENSG00000169371	SNUPN	1.24199	1.20939
287	ENSG00000196747	H2AC13	-0.662877	1.20901
288	ENSG00000159055	MIS18A	2.48782	1.2076
289	ENSG00000104343	UBE2W	-0.0955059	1.20691
290	ENSG00000068885	IFT80	2.56474	1.20542
291	ENSG00000170004	CHD3	1.4919	1.20446
292	ENSG00000185000	DGAT1	0.754454	1.2036
293	ENSG00000161647	MPP3	1.33905	1.20328
294	ENSG00000146085	MMUT	2.76274	1.20198
295	ENSG00000104853	CLPTM1	1.01316	1.20195
296	ENSG00000116668	SWT1	2.97824	1.20036
297	ENSG00000131626	PPFIA1	1.47971	1.19826
298	ENSG00000113272	THG1L	1.52845	1.19811
299	ENSG00000105372	RPS19	2.00249	1.1972
300	ENSG00000070061	ELP1	0.803993	1.19689
301	ENSG00000132780	NASP	0.933974	1.19668
302	ENSG00000186448	ZNF197	0.389474	1.19561
303	ENSG00000163132	MSX1	2.25775	1.19535
304	ENSG00000133460	SLC2A11	1.55297	1.19106
305	ENSG00000146063	TRIM41	0.231844	1.19025
306	ENSG00000187608	ISG15	0.3124	1.18983
307	ENSG00000008988	RPS20	0.674807	1.18879
308	ENSG00000071626	DAZAP1	4.02423	1.18763
309	ENSG00000133393	FOPNL	3.08916	1.18549
310	ENSG00000169976	SF3B5	3.51008	1.18509
311	ENSG00000133226	SRRM1	2.44977	1.18387
312	ENSG00000117906	RCN2	-0.0142845	1.18327
313	ENSG00000105464	GRIN2D	3.24138	1.18229
314	ENSG00000166326	TRIM44	0.488598	1.17942
315	ENSG00000100387	RBX1	1.37444	1.17509
316	ENSG00000178761	FAM219B	2.61011	1.17407
317	ENSG00000164048	ZNF589	0.995105	1.17366
318	ENSG00000114650	SCAP	2.54797	1.17322
319	ENSG00000162073	PAQR4	3.2779	1.17316
320	ENSG00000131100	ATP6V1E1	2.5047	1.17276
321	ENSG00000102890	ELMO3	1.74519	1.17125
322	ENSG00000148399	DPH7	2.00454	1.16943
323	ENSG00000108306	FBXL20	2.3921	1.16806
324	ENSG00000143878	RHOB	3.18107	1.16682
325	ENSG00000006831	ADIPOR2	-0.0460947	1.16666
326	ENSG00000078070	MCCC1	2.16279	1.16601
327	ENSG00000182512	GLRX5	0.978114	1.16475
328	ENSG00000079739	PGM1	2.88451	1.16409
329	ENSG00000109519	GRPEL1	1.08396	1.16307
330	ENSG00000148719	DNAJB12	-0.0514446	1.16164
331	ENSG00000196787	H2AC11	1.28656	1.16122
332	ENSG00000254986	DPP3	0.953168	1.1595
333	ENSG00000057935	MTA3	1.912	1.15897
334	ENSG00000126756	UXT	2.06196	1.15687
335	ENSG00000126945	HNRNPH2	3.59431	1.15424
336	ENSG00000148019	CEP78	-0.672425	1.15359
337	ENSG00000153292	ADGRF1	2.68288	1.15152
338	ENSG00000132541	RIDA	4.60457	1.15098
339	ENSG00000176953	NFATC2IP	1.75748	1.15069
340	ENSG00000066583	ISOC1	1.57996	1.14945
341	ENSG00000144445	KANSL1L	-0.36881	1.14739
342	ENSG00000179933	C14orf119	0.837879	1.14725
343	ENSG00000163516	ANKZF1	1.37269	1.1464
344	ENSG00000179387	ELMOD2	1.48279	1.14596
345	ENSG00000139323	POC1B	0.574983	1.1451
346	ENSG00000070047	PHRF1	0.850118	1.14492
347	ENSG00000166348	USP54	3.21257	1.14466
348	ENSG00000166946	CCNDBP1	0.355374	1.14375
349	ENSG00000183963	SMTN	1.87394	1.14371
350	ENSG00000106683	LIMK1	2.62445	1.14343
351	ENSG00000168916	ZNF608	3.06138	1.14112
352	ENSG00000047230	CTPS2	2.5411	1.13948
353	ENSG00000134480	CCNH	0.256119	1.13929
354	ENSG00000197798	FAM118B	0.7488	1.13911
355	ENSG00000035687	ADSS2	0.965471	1.13906
356	ENSG00000014216	CAPN1	2.25252	1.13809
357	ENSG00000027001	MIPEP	2.62333	1.13588
358	ENSG00000180035	ZNF48	0.785561	1.13534
359	ENSG00000145592	RPL37	2.32739	1.13494
360	ENSG00000156374	PCGF6	2.6132	1.13487
361	ENSG00000107281	NPDC1	-1.90926	1.13208
362	ENSG00000165280	VCP	1.58501	1.13205
363	ENSG00000164292	RHOBTB3	0.0378327	1.1298
364	ENSG00000072210	ALDH3A2	0.578581	1.12845
365	ENSG00000054654	SYNE2	1.26369	1.12823
366	ENSG00000285943	AC112128.1	-0.520905	1.12804
367	ENSG00000121152	NCAPH	0.749301	1.12785
368	ENSG00000134815	DHX34	1.90452	1.12734
369	ENSG00000117308	GALE	-1.71219	1.12669
370	ENSG00000115993	TRAK2	0.422319	1.12541
371	ENSG00000168872	DDX19A	1.20855	1.12423
372	ENSG00000001630	CYP51A1	1.98625	1.12377
373	ENSG00000285772	AC000120.3	1.98886	1.12369
374	ENSG00000183431	SF3A3	3.35804	1.1231
375	ENSG00000066777	ARFGEF1	0.126558	1.12284
376	ENSG00000112893	MAN2A1	2.71931	1.12239
377	ENSG00000147457	CHMP7	3.6021	1.1215
378	ENSG00000284194	SCO2	6.287	1.1213
379	ENSG00000198763	MT-ND2	0.363916	1.11984
380	ENSG00000106245	BUD31	2.57254	1.11756
381	ENSG00000132475	H3-3B	1.59084	1.11245
382	ENSG00000111785	RIC8B	1.171	1.11187
383	ENSG00000182473	EXOC7	0.562577	1.11156
384	ENSG00000168291	PDHB	0.231451	1.11088
385	ENSG00000278677	H2AC17	0.073013	1.1106
386	ENSG00000147394	ZNF185	1.1672	1.1092
387	ENSG00000272822	AC073610.2	0.742915	1.10835
388	ENSG00000083097	DOP1A	1.63388	1.10701
389	ENSG00000105011	ASF1B	1.91646	1.10377
390	ENSG00000162734	PEA15	1.35347	1.10374
391	ENSG00000203950	RTL8A	1.10629	1.10357
392	ENSG00000054148	PHPT1	1.67472	1.10347
393	ENSG00000101337	TM9SF4	2.44536	1.10317
394	ENSG00000100211	CBY1	1.20663	1.10308
395	ENSG00000135749	PCNX2	2.53096	1.10297
396	ENSG00000160783	PMF1	2.82971	1.10207
397	ENSG00000112667	DNPH1	-0.253772	1.10017
398	ENSG00000206503	HLA-A	1.61887	1.10016
399	ENSG00000278311	GGNBP2	3.01611	1.09921
400	ENSG00000169902	TPST1	-0.537699	1.0987
401	ENSG00000133731	IMPA1	0.584074	1.09615
402	ENSG00000115419	GLS	2.66778	1.09433
403	ENSG00000144048	DUSP11	1.10377	1.09236
404	ENSG00000124942	AHNAK	3.93121	1.09176
405	ENSG00000154144	TBRG1	-0.0581548	1.09088
406	ENSG00000101412	E2F1	2.30043	1.08924
407	ENSG00000100558	PLEK2	0.587003	1.08608
408	ENSG00000177888	ZBTB41	2.34509	1.08494
409	ENSG00000085733	CTTN	4.17621	1.08338
410	ENSG00000147274	RBMX	-0.297697	1.08251
411	ENSG00000204237	OXLD1	0.85721	1.08241
412	ENSG00000156697	UTP14A	0.973161	1.08188
413	ENSG00000204536	CCHCR1	4.55049	1.08088
414	ENSG00000178074	C2orf69	-0.0212771	1.08057
415	ENSG00000082213	C5orf22	1.50887	1.07919
416	ENSG00000105220	GPI	2.4019	1.07889
417	ENSG00000103353	UBFD1	1.44814	1.07773
418	ENSG00000141959	PFKL	1.57673	1.07646
419	ENSG00000125971	DYNLRB1	3.72783	1.0764
420	ENSG00000227057	WDR46	-1.61185	1.07636
421	ENSG00000143337	TOR1AIP1	0.938238	1.07586
422	ENSG00000115760	BIRC6	1.99544	1.07503
423	ENSG00000100934	SEC23A	1.91095	1.07476
424	ENSG00000163634	THOC7	1.82054	1.07201
425	ENSG00000275835	TUBGCP5	-1.00402	1.07147
426	ENSG00000130560	UBAC1	0.878666	1.06942
427	ENSG00000109062	SLC9A3R1	1.57192	1.06771
428	ENSG00000138442	WDR12	0.898791	1.06766
429	ENSG00000006744	ELAC2	0.307764	1.06764
430	ENSG00000178057	NDUFAF3	-0.113667	1.06679
431	ENSG00000156990	RPUSD3	-1.91767	1.06544
432	ENSG00000165669	FAM204A	0.835906	1.06544
433	ENSG00000160948	VPS28	1.72473	1.06457
434	ENSG00000120738	EGR1	3.38172	1.06301
435	ENSG00000286112	AL441992.3	0.266165	1.06196
436	ENSG00000144791	LIMD1	0.541929	1.06189
437	ENSG00000150433	TMEM218	1.32269	1.06187
438	ENSG00000170906	NDUFA3	-2.24	1.06109
439	ENSG00000100138	SNU13	1.37975	1.05977
440	ENSG00000135392	DNAJC14	1.50251	1.05941
441	ENSG00000058056	USP13	1.28125	1.05827
442	ENSG00000140740	UQCRC2	2.29083	1.05816
443	ENSG00000138756	BMP2K	2.22384	1.05812
444	ENSG00000170310	STX8	0.860138	1.05649
445	ENSG00000064666	CNN2	2.08209	1.05648
446	ENSG00000166133	RPUSD2	1.33101	1.05397
447	ENSG00000171729	TMEM51	3.63211	1.05284
448	ENSG00000153291	SLC25A27	0.463184	1.05223
449	ENSG00000140395	WDR61	0.902578	1.05207
450	ENSG00000106665	CLIP2	1.65042	1.05195
451	ENSG00000188483	IER5L	0.262398	1.05063
452	ENSG00000161999	JMJD8	0.131283	1.04776
453	ENSG00000168014	C2CD3	1.82047	1.0446
454	ENSG00000197756	RPL37A	1.40217	1.04441
455	ENSG00000165487	MICU2	2.57162	1.044
456	ENSG00000138190	EXOC6	1.46663	1.04355
457	ENSG00000101152	DNAJC5	2.26105	1.04279
458	ENSG00000167280	ENGASE	2.37906	1.04256
459	ENSG00000055732	MCOLN3	1.0937	1.04145
460	ENSG00000100288	CHKB	-1.75861	1.04025
461	ENSG00000060140	STYK1	2.92976	1.03946
462	ENSG00000126878	AIF1L	0.827776	1.0393
463	ENSG00000160211	G6PD	2.42481	1.03905
464	ENSG00000213390	ARHGAP19	1.88305	1.03855
465	ENSG00000068137	PLEKHH3	3.26727	1.03734
466	ENSG00000285404	Z82190.2	0.469396	1.03719
467	ENSG00000136840	ST6GALNAC4	0.642503	1.03543
468	ENSG00000007168	PAFAH1B1	-0.48977	1.03539
469	ENSG00000182871	COL18A1	1.59838	1.03462
470	ENSG00000078114	NEBL	-1.10431	1.03333
471	ENSG00000184640	SEPTIN9	3.46364	1.03296
472	ENSG00000136731	UGGT1	1.96241	1.03026
473	ENSG00000116273	PHF13	3.4304	1.03
474	ENSG00000013375	PGM3	0.864221	1.02975
475	ENSG00000105738	SIPA1L3	1.71221	1.02942
476	ENSG00000167553	TUBA1C	1.73268	1.02879
477	ENSG00000100207	TCF20	1.72274	1.02841
478	ENSG00000003436	TFPI	4.63184	1.02769
479	ENSG00000127952	STYXL1	1.08247	1.0274
480	ENSG00000175793	SFN	0.465307	1.02718
481	ENSG00000173064	HECTD4	1.79525	1.02663
482	ENSG00000241878	PISD	3.03753	1.0257
483	ENSG00000141696	P3H4	2.20652	1.02496
484	ENSG00000132781	MUTYH	2.13263	1.02322
485	ENSG00000104219	ZDHHC2	0.137613	1.02291
486	ENSG00000256514	AP003419.1	2.03526	1.02273
487	ENSG00000126107	HECTD3	1.6562	1.0223
488	ENSG00000126858	RHOT1	1.58441	1.02217
489	ENSG00000134779	TPGS2	0.316287	1.02202
490	ENSG00000006625	GGCT	0.63887	1.02095
491	ENSG00000136237	RAPGEF5	2.72377	1.02088
492	ENSG00000110717	NDUFS8	2.4853	1.02067
493	ENSG00000047621	C12orf4	2.26035	1.01998
494	ENSG00000160781	PAQR6	2.35535	1.0184
495	ENSG00000055332	EIF2AK2	2.08267	1.0172
496	ENSG00000128578	STRIP2	0.0196376	1.01639
497	ENSG00000148908	RGS10	1.3486	1.01565
498	ENSG00000130783	CCDC62	0.515308	1.01401
499	ENSG00000132356	PRKAA1	0.592705	1.01386
500	ENSG00000144021	CIAO1	2.89818	1.01379
501	ENSG00000103024	NME3	1.18342	1.01311
502	ENSG00000108829	LRRC59	-0.0671161	1.01265
503	ENSG00000060642	PIGV	2.10604	1.01231
504	ENSG00000083720	OXCT1	0.61362	1.01155
505	ENSG00000059588	TARBP1	1.18412	1.01075
506	ENSG00000145623	OSMR	-0.0603775	1.01031
507	ENSG00000150990	DHX37	1.685	1.0102
508	ENSG00000198917	SPOUT1	0.362946	1.00981
509	ENSG00000100345	MYH9	2.58905	1.00952
510	ENSG00000128283	CDC42EP1	1.21177	1.00939
511	ENSG00000025800	KPNA6	2.29255	1.00766
512	ENSG00000114388	NPRL2	3.17764	1.00645
513	ENSG00000204316	MRPL38	3.27824	1.00569
514	ENSG00000163166	IWS1	-1.76332	1.00335
515	ENSG00000248405	PRR5-ARHGAP8	1.74534	1.00287
516	ENSG00000068097	HEATR6	0.906075	1.00156
517	ENSG00000204590	GNL1	2.22792	1
518	ENSG00000101751	POLI	3.97452	1
519	ENSG00000284969	AL049629.2	0.237811	0.998939
520	ENSG00000197153	H3C12	0.0376014	0.998782
521	ENSG00000176101	SSNA1	2.61292	0.998651
522	ENSG00000156042	CFAP70	1.48439	0.998251
523	ENSG00000267426	AC087289.3	3.26224	0.998188
524	ENSG00000110274	CEP164	2.05278	0.99673
525	ENSG00000185515	BRCC3	0.528984	0.996333
526	ENSG00000124802	EEF1E1	0.558994	0.995717
527	ENSG00000217128	FNIP1	2.56287	0.995691
528	ENSG00000153015	CWC27	1.4197	0.994952
529	ENSG00000033030	ZCCHC8	1.58326	0.99396
530	ENSG00000153317	ASAP1	2.88396	0.992752
531	ENSG00000111652	COPS7A	1.20074	0.991986
532	ENSG00000203546	AL139353.1	0.239375	0.991491
533	ENSG00000133639	BTG1	-0.00854678	0.990778
534	ENSG00000006327	TNFRSF12A	2.36389	0.990459
535	ENSG00000163931	TKT	0.525138	0.990179
536	ENSG00000152527	PLEKHH2	1.51962	0.990106
537	ENSG00000143321	HDGF	1.90716	0.986393
538	ENSG00000176407	KCMF1	1.14157	0.985854
539	ENSG00000125458	NT5C	1.773	0.985708
540	ENSG00000102753	KPNA3	1.99943	0.98547
541	ENSG00000103852	TTC23	1.81322	0.985211
542	ENSG00000139318	DUSP6	1.08712	0.982234
543	ENSG00000164134	NAA15	0.361401	0.981498
544	ENSG00000110917	MLEC	2.76427	0.978781
545	ENSG00000144589	STK11IP	3.84371	0.976642
546	ENSG00000197362	ZNF786	0.767038	0.976277
547	ENSG00000158669	GPAT4	-1.40939	0.975912
548	ENSG00000266997	AC090227.2	-0.607175	0.974635
549	ENSG00000090006	LTBP4	1.25114	0.974623
550	ENSG00000103067	ESRP2	0.767986	0.969234
551	ENSG00000167779	IGFBP6	1.17712	0.968927
552	ENSG00000119777	TMEM214	1.40326	0.96746
553	ENSG00000161013	MGAT4B	0.879176	0.966032
554	ENSG00000106246	PTCD1	1.17487	0.965821
555	ENSG00000129055	ANAPC13	2.19393	0.965476
556	ENSG00000073350	LLGL2	3.05409	0.965437
557	ENSG00000065060	UHRF1BP1	-0.138485	0.964918
558	ENSG00000120533	ENY2	1.17991	0.964293
559	ENSG00000105341	DMAC2	2.84203	0.964065
560	ENSG00000092621	PHGDH	1.2665	0.963501
561	ENSG00000073584	SMARCE1	1.81835	0.963409
562	ENSG00000166165	CKB	-0.117571	0.962593
563	ENSG00000052749	RRP12	1.626	0.961262
564	ENSG00000138771	SHROOM3	0.748142	0.957354
565	ENSG00000148481	MINDY3	0.736124	0.956955
566	ENSG00000142273	CBLC	0.865783	0.956812
567	ENSG00000095059	DHPS	1.23479	0.956689
568	ENSG00000148143	ZNF462	0.889942	0.956504
569	ENSG00000114738	MAPKAPK3	0.332598	0.955603
570	ENSG00000049541	RFC2	0.342224	0.955288
571	ENSG00000278828	H3C10	-0.147657	0.954585
572	ENSG00000158109	TPRG1L	2.25899	0.953993
573	ENSG00000107937	GTPBP4	0.976174	0.951302
574	ENSG00000147065	MSN	2.11878	0.950954
575	ENSG00000187742	SECISBP2	2.24274	0.950901
576	ENSG00000171848	RRM2	-1.12121	0.950104
577	ENSG00000156304	SCAF4	2.08761	0.949943
578	ENSG00000204859	ZBTB48	5.54879	0.949672
579	ENSG00000178878	APOLD1	1.88917	0.949468
580	ENSG00000176390	CRLF3	2.66617	0.949371
581	ENSG00000103061	SLC7A6OS	2.30485	0.949275
582	ENSG00000162191	UBXN1	1.97967	0.946177
583	ENSG00000082269	FAM135A	1.34938	0.945887
584	ENSG00000182768	NGRN	0.910229	0.945308
585	ENSG00000151176	PLBD2	-1.16532	0.945168
586	ENSG00000134250	NOTCH2	0.880581	0.944677
587	ENSG00000084652	TXLNA	2.92922	0.943997
588	ENSG00000183624	HMCES	1.4191	0.94384
589	ENSG00000107731	UNC5B	0.24375	0.943113
590	ENSG00000110536	PTPMT1	0.38981	0.942103
591	ENSG00000104881	PPP1R13L	1.91132	0.94177
592	ENSG00000137275	RIPK1	0.352403	0.941434
593	ENSG00000070756	PABPC1	0.437016	0.941343
594	ENSG00000172244	C5orf34	2.04755	0.941343
595	ENSG00000142528	ZNF473	0.831084	0.940324
596	ENSG00000176974	SHMT1	1.17019	0.939529
597	ENSG00000113594	LIFR	1.27997	0.938492
598	ENSG00000160584	SIK3	0.0104219	0.938284
599	ENSG00000160410	SHKBP1	1.80662	0.938039
600	ENSG00000213782	DDX47	1.88528	0.93636
601	ENSG00000075142	SRI	0.374251	0.936082
602	ENSG00000115568	ZNF142	0.212794	0.935971
603	ENSG00000137106	GRHPR	0.895245	0.9357
604	ENSG00000181218	H2AW	-0.357749	0.935186
605	ENSG00000137411	VARS2	1.6572	0.933589
606	ENSG00000174796	THAP6	-0.837965	0.933161
607	ENSG00000255054	AL020996.2	-0.503394	0.931388
608	ENSG00000163812	ZDHHC3	0.885632	0.929834
609	ENSG00000100258	LMF2	1.0693	0.929801
610	ENSG00000088298	EDEM2	2.23065	0.928442
611	ENSG00000148700	ADD3	1.247	0.927235
612	ENSG00000211460	TSN	2.09065	0.924246
613	ENSG00000048405	ZNF800	0.70502	0.923745
614	ENSG00000112855	HARS2	1.00849	0.920886
615	ENSG00000085998	POMGNT1	0.616737	0.920262
616	ENSG00000180228	PRKRA	1.39916	0.920061
617	ENSG00000198722	UNC13B	1.66851	0.918746
618	ENSG00000161526	SAP30BP	2.39309	0.918349
619	ENSG00000123064	DDX54	2.17427	0.918049
620	ENSG00000079805	DNM2	1.83895	0.915985
621	ENSG00000114745	GORASP1	1.94102	0.912947
622	ENSG00000177084	POLE	2.30621	0.912889
623	ENSG00000140598	EFL1	1.51413	0.911946
624	ENSG00000129518	EAPP	3.05425	0.911041
625	ENSG00000105287	PRKD2	1.75088	0.910966
626	ENSG00000242485	MRPL20	1.29661	0.91073
627	ENSG00000095906	NUBP2	2.1494	0.91064
628	ENSG00000157978	LDLRAP1	1.95911	0.910253
629	ENSG00000068323	TFE3	3.97361	0.908957
630	ENSG00000175309	PHYKPL	1.16242	0.908018
631	ENSG00000108828	VAT1	-0.434125	0.907825
632	ENSG00000188643	S100A16	1.08665	0.907541
633	ENSG00000150401	DCUN1D2	2.66956	0.907513
634	ENSG00000178401	DNAJC22	-0.169233	0.907445
635	ENSG00000103534	TMC5	0.589163	0.907326
636	ENSG00000008838	MED24	1.5605	0.907004
637	ENSG00000108788	MLX	0.982489	0.90284
638	ENSG00000175467	SART1	-0.940404	0.902455
639	ENSG00000103549	RNF40	1.41044	0.899629
640	ENSG00000064419	TNPO3	2.46823	0.899169
641	ENSG00000204104	TRAF3IP1	1.69056	0.898856
642	ENSG00000119203	CPSF3	2.05568	0.897987
643	ENSG00000126249	PDCD2L	1.35289	0.897073
644	ENSG00000068308	OTUD5	2.39552	0.896952
645	ENSG00000169967	MAP3K2	0.0556705	0.896868
646	ENSG00000109674	NEIL3	0.970032	0.89681
647	ENSG00000167088	SNRPD1	0.404864	0.895837
648	ENSG00000142546	NOSIP	4.01242	0.895533
649	ENSG00000113108	APBB3	1.61006	0.895203
650	ENSG00000158864	NDUFS2	1.58068	0.894775
651	ENSG00000130958	SLC35D2	1.84021	0.894569
652	ENSG00000187239	FNBP1	1.51009	0.892765
653	ENSG00000221829	FANCG	1.569	0.89261
654	ENSG00000151116	UEVLD	1.06199	0.892433
655	ENSG00000130305	NSUN5	-1.14045	0.892313
656	ENSG00000068366	ACSL4	0.275888	0.892075
657	ENSG00000153066	TXNDC11	1.37629	0.890996
658	ENSG00000145495	MARCHF6	-0.0514144	0.890365
659	ENSG00000112514	CUTA	1.75121	0.889462
660	ENSG00000071205	ARHGAP10	1.72965	0.889178
661	ENSG00000156639	ZFAND3	1.50112	0.889074
662	ENSG00000126804	ZBTB1	0.0724693	0.88878
663	ENSG00000122644	ARL4A	0.495349	0.887845
664	ENSG00000188223	AD000671.1	3.15896	0.887266
665	ENSG00000204351	SKIV2L	0.218466	0.887245
666	ENSG00000124608	AARS2	0.150164	0.886474
667	ENSG00000155592	ZKSCAN2	2.82928	0.885404
668	ENSG00000139146	SINHCAF	1.57518	0.885092
669	ENSG00000187790	FANCM	-0.162795	0.884299
670	ENSG00000122483	CCDC18	1.67989	0.884258
671	ENSG00000086544	ITPKC	2.93728	0.884062
672	ENSG00000182095	TNRC18	2.29733	0.88403
673	ENSG00000157456	CCNB2	1.61971	0.884021
674	ENSG00000186638	KIF24	0.579877	0.882492
675	ENSG00000067082	KLF6	1.33224	0.88194
676	ENSG00000198466	ZNF587	0.116653	0.881292
677	ENSG00000116133	DHCR24	1.39259	0.880544
678	ENSG00000134262	AP4B1	-0.0944812	0.879775
679	ENSG00000221978	CCNL2	3.90444	0.879026
680	ENSG00000102103	PQBP1	2.30415	0.878981
681	ENSG00000244187	TMEM141	0.0256591	0.878306
682	ENSG00000151746	BICD1	1.45831	0.878018
683	ENSG00000073792	IGF2BP2	1.47144	0.877875
684	ENSG00000197894	ADH5	1.44913	0.877717
685	ENSG00000167272	POP5	0.332496	0.877198
686	ENSG00000107036	RIC1	1.83484	0.87714
687	ENSG00000183010	PYCR1	1.79192	0.876256
688	ENSG00000184363	PKP3	-3.54018	0.876112
689	ENSG00000115694	STK25	-0.640148	0.875408
690	ENSG00000180488	MIGA1	-0.571222	0.875053
691	ENSG00000076108	BAZ2A	2.9444	0.87386
692	ENSG00000117748	RPA2	2.35652	0.873529
693	ENSG00000120647	CCDC77	2.49134	0.872476
694	ENSG00000099194	SCD	1.81995	0.871392
695	ENSG00000099341	PSMD8	1.04535	0.869179
696	ENSG00000114353	GNAI2	1.39158	0.8683
697	ENSG00000100888	CHD8	3.50699	0.868222
698	ENSG00000166913	YWHAB	0.764323	0.867572
699	ENSG00000239779	WBP1	1.61892	0.866388
700	ENSG00000100075	SLC25A1	1.67928	0.866045
701	ENSG00000285827	AP001267.5	-0.379545	0.864641
702	ENSG00000101346	POFUT1	1.48348	0.863688
703	ENSG00000115657	ABCB6	1.90024	0.863492
704	ENSG00000284820	AC068946.2	1.90024	0.863492
705	ENSG00000177917	ARL6IP6	1.4847	0.863156
706	ENSG00000078668	VDAC3	1.43901	0.862933
707	ENSG00000138032	PPM1B	0.735612	0.86268
708	ENSG00000156709	AIFM1	1.41719	0.862264
709	ENSG00000137642	SORL1	2.72563	0.861746
710	ENSG00000129559	NEDD8	1.85756	0.860765
711	ENSG00000112759	SLC29A1	0.550528	0.860268
712	ENSG00000175305	CCNE2	-0.0677629	0.860172
713	ENSG00000092841	MYL6	1.34565	0.859923
714	ENSG00000250264	AL669918.1	0.404447	0.859505
715	ENSG00000115839	RAB3GAP1	-0.826129	0.858806
716	ENSG00000120889	TNFRSF10B	3.11616	0.858536
717	ENSG00000114127	XRN1	1.36395	0.858205
718	ENSG00000100416	TRMU	2.8179	0.856341
719	ENSG00000099995	SF3A1	2.93817	0.856258
720	ENSG00000172732	MUS81	-0.0290151	0.856168
721	ENSG00000171490	RSL1D1	1.48445	0.855846
722	ENSG00000077235	GTF3C1	2.0911	0.854694
723	ENSG00000122435	TRMT13	1.48419	0.853961
724	ENSG00000153406	NMRAL1	0.227046	0.85364
725	ENSG00000158863	FAM160B2	-0.580898	0.852697
726	ENSG00000167699	GLOD4	-0.248707	0.852518
727	ENSG00000105486	LIG1	3.37064	0.852515
728	ENSG00000142655	PEX14	2.46375	0.851741
729	ENSG00000157450	RNF111	0.130554	0.851551
730	ENSG00000026508	CD44	2.00962	0.849941
731	ENSG00000158411	MITD1	2.71354	0.846929
732	ENSG00000119326	CTNNAL1	2.86171	0.846899
733	ENSG00000128159	TUBGCP6	2.03746	0.846215
734	ENSG00000156463	SH3RF2	0.316845	0.846025
735	ENSG00000123268	ATF1	0.733274	0.845809
736	ENSG00000154127	UBASH3B	2.00612	0.845397
737	ENSG00000164506	STXBP5	1.10072	0.845142
738	ENSG00000023228	NDUFS1	1.93908	0.844631
739	ENSG00000179046	TRIML2	1.23064	0.842673
740	ENSG00000109111	SUPT6H	1.40967	0.842404
741	ENSG00000143727	ACP1	1.36418	0.841811
742	ENSG00000135723	FHOD1	2.5077	0.841621
743	ENSG00000138073	PREB	0.989404	0.839786
744	ENSG00000075856	SART3	1.51074	0.839508
745	ENSG00000127527	EPS15L1	1.87456	0.839418
746	ENSG00000197114	ZGPAT	2.24967	0.839119
747	ENSG00000151276	MAGI1	0.956217	0.838725
748	ENSG00000124067	SLC12A4	1.09245	0.838458
749	ENSG00000153147	SMARCA5	0.894092	0.837987
750	ENSG00000187531	SIRT7	3.91493	0.837644
751	ENSG00000089876	DHX32	1.86479	0.83672
752	ENSG00000107897	ACBD5	1.10933	0.835886
753	ENSG00000168434	COG7	2.01119	0.835879
754	ENSG00000172239	PAIP1	1.4383	0.834835
755	ENSG00000146425	DYNLT1	2.27832	0.83452
756	ENSG00000129116	PALLD	0.847326	0.834313
757	ENSG00000108799	EZH1	1.78717	0.832569
758	ENSG00000131467	PSME3	0.476536	0.832207
759	ENSG00000124593	AL365205.1	1.23583	0.831862
760	ENSG00000155313	USP25	-1.27498	0.831289
761	ENSG00000138376	BARD1	1.0249	0.831224
762	ENSG00000117298	ECE1	1.669	0.830483
763	ENSG00000133961	NUMB	1.19825	0.830154
764	ENSG00000125995	ROMO1	-0.328519	0.829761
765	ENSG00000153560	UBP1	1.65446	0.828532
766	ENSG00000132383	RPA1	0.649558	0.827699
767	ENSG00000072506	HSD17B10	1.17911	0.827482
768	ENSG00000167693	NXN	2.11954	0.827314
769	ENSG00000137656	BUD13	2.07929	0.82652
770	ENSG00000103064	SLC7A6	2.3991	0.825257
771	ENSG00000172586	CHCHD1	1.96034	0.824898
772	ENSG00000102804	TSC22D1	0.594805	0.824001
773	ENSG00000087842	PIR	2.39812	0.822907
774	ENSG00000117222	RBBP5	1.11572	0.822709
775	ENSG00000169019	COMMD8	-0.153175	0.822693
776	ENSG00000164466	SFXN1	1.82704	0.822539
777	ENSG00000184203	PPP1R2	0.710725	0.822474
778	ENSG00000171311	EXOSC1	0.531797	0.822021
779	ENSG00000159166	LAD1	0.875567	0.820731
780	ENSG00000166888	STAT6	-0.56662	0.820729
781	ENSG00000175390	EIF3F	0.916068	0.820592
782	ENSG00000169035	KLK7	1.28429	0.820532
783	ENSG00000068394	GPKOW	0.616238	0.820412
784	ENSG00000145912	NHP2	0.693307	0.820319
785	ENSG00000135821	GLUL	1.01259	0.820207
786	ENSG00000013306	SLC25A39	2.57445	0.819384
787	ENSG00000179832	MROH1	2.33366	0.819032
788	ENSG00000107104	KANK1	1.92821	0.817743
789	ENSG00000125835	SNRPB	2.61738	0.817674
790	ENSG00000102580	DNAJC3	2.0186	0.816257
791	ENSG00000137513	NARS2	0.726223	0.815126
792	ENSG00000204310	AGPAT1	1.52871	0.815005
793	ENSG00000128311	TST	0.200257	0.81484
794	ENSG00000145494	NDUFS6	1.12912	0.814647
795	ENSG00000148120	AOPEP	2.43973	0.813229
796	ENSG00000148341	SH3GLB2	-1.83167	0.812958
797	ENSG00000243414	TICAM2	2.29925	0.812944
798	ENSG00000143799	PARP1	1.71178	0.812642
799	ENSG00000167264	DUS2	1.70317	0.812496
800	ENSG00000113569	NUP155	1.17757	0.812195
801	ENSG00000070718	AP3M2	-0.174261	0.81132
802	ENSG00000174669	SLC29A2	1.22368	0.810871
803	ENSG00000023041	ZDHHC6	0.281994	0.810581
804	ENSG00000110888	CAPRIN2	2.17954	0.810417
805	ENSG00000175826	CTDNEP1	2.75473	0.809848
806	ENSG00000119471	HSDL2	1.35529	0.809731
807	ENSG00000114779	ABHD14B	-0.385291	0.809106
808	ENSG00000164808	SPIDR	0.877061	0.808737
809	ENSG00000157191	NECAP2	1.13299	0.808399
810	ENSG00000168876	ANKRD49	2.29011	0.807069
811	ENSG00000166681	BEX3	1.99298	0.806151
812	ENSG00000167085	PHB	2.14573	0.805672
813	ENSG00000005801	ZNF195	1.32323	0.805157
814	ENSG00000131153	GINS2	0.344608	0.804917
815	ENSG00000075618	FSCN1	0.513302	0.804915
816	ENSG00000136986	DERL1	1.59414	0.804614
817	ENSG00000141985	SH3GL1	1.21868	0.803811
818	ENSG00000091542	ALKBH5	2.67604	0.803493
819	ENSG00000189067	LITAF	2.17409	0.803331
820	ENSG00000156469	MTERF3	1.63113	0.801616
821	ENSG00000165458	INPPL1	3.06734	0.801548
822	ENSG00000179526	SHARPIN	3.82853	0.801384
823	ENSG00000171566	PLRG1	2.28211	0.800837
824	ENSG00000274049	INO80B-WBP1	1.53798	0.800022
825	ENSG00000158006	PAFAH2	1.66458	0.799693
826	ENSG00000176994	SMCR8	3.14535	0.798418
827	ENSG00000188690	UROS	1.87003	0.798383
828	ENSG00000177842	ZNF620	0.660254	0.798021
829	ENSG00000171109	MFN1	0.0153547	0.797904
830	ENSG00000128342	LIF	4.25879	0.797207
831	ENSG00000032389	EIPR1	2.47272	0.796724
832	ENSG00000161057	PSMC2	1.72187	0.796651
833	ENSG00000105879	CBLL1	1.81147	0.796152
834	ENSG00000170242	USP47	-0.141577	0.796085
835	ENSG00000149923	PPP4C	1.37459	0.795184
836	ENSG00000174720	LARP7	2.28072	0.795077
837	ENSG00000139154	AEBP2	0.316743	0.795076
838	ENSG00000149932	TMEM219	1.77151	0.794874
839	ENSG00000132256	TRIM5	1.76218	0.794105
840	ENSG00000109118	PHF12	2.24741	0.793132
841	ENSG00000064995	TAF11	0.936826	0.792637
842	ENSG00000105197	TIMM50	2.34355	0.792607
843	ENSG00000175756	AURKAIP1	2.18886	0.792148
844	ENSG00000131165	CHMP1A	2.62625	0.792016
845	ENSG00000198911	SREBF2	3.36345	0.791862
846	ENSG00000129636	ITFG1	0.670481	0.790371
847	ENSG00000146826	MAP11	2.76925	0.79024
848	ENSG00000197879	MYO1C	1.95252	0.789913
849	ENSG00000124486	USP9X	0.953978	0.789522
850	ENSG00000184205	TSPYL2	2.24164	0.787673
851	ENSG00000114315	HES1	2.15928	0.787362
852	ENSG00000178035	IMPDH2	0.876231	0.787027
853	ENSG00000161179	YDJC	0.646356	0.787001
854	ENSG00000198042	MAK16	1.05271	0.78655
855	ENSG00000182004	SNRPE	0.214359	0.785925
856	ENSG00000136699	SMPD4	3.94663	0.785896
857	ENSG00000076242	MLH1	2.0133	0.784551
858	ENSG00000120265	PCMT1	2.82583	0.784255
859	ENSG00000166847	DCTN5	1.44354	0.784095
860	ENSG00000156471	PTDSS1	0.128718	0.78405
861	ENSG00000124422	USP22	0.97443	0.783662
862	ENSG00000064999	ANKS1A	1.52683	0.783195
863	ENSG00000197747	S100A10	1.23127	0.782869
864	ENSG00000130725	UBE2M	1.47805	0.782373
865	ENSG00000178188	SH2B1	2.89525	0.78085
866	ENSG00000124733	MEA1	0.574928	0.780004
867	ENSG00000127511	SIN3B	1.75492	0.77997
868	ENSG00000112655	PTK7	2.11154	0.778968
869	ENSG00000104957	CCDC130	2.7625	0.778901
870	ENSG00000137338	PGBD1	1.34429	0.778481
871	ENSG00000251201	TMED7-TICAM2	2.2757	0.777741
872	ENSG00000110768	GTF2H1	2.73926	0.776587
873	ENSG00000205413	SAMD9	1.19443	0.775113
874	ENSG00000257767	AC002996.1	1.04355	0.772835
875	ENSG00000189159	JPT1	1.42145	0.771408
876	ENSG00000176371	ZSCAN2	0.233488	0.771307
877	ENSG00000160633	SAFB	2.74703	0.770236
878	ENSG00000125107	CNOT1	1.53312	0.768464
879	ENSG00000213719	CLIC1	1.90527	0.767173
880	ENSG00000110931	CAMKK2	2.9421	0.766306
881	ENSG00000073050	XRCC1	2.55329	0.765986
882	ENSG00000198899	MT-ATP6	-0.0568779	0.765349
883	ENSG00000157259	GATAD1	0.401741	0.76517
884	ENSG00000114062	UBE3A	0.625003	0.764703
885	ENSG00000136811	ODF2	1.4198	0.764603
886	ENSG00000198363	ASPH	2.08426	0.763635
887	ENSG00000000419	DPM1	1.91236	0.761204
888	ENSG00000146067	FAM193B	3.95665	0.760651
889	ENSG00000157916	RER1	1.16807	0.760437
890	ENSG00000113141	IK	2.84384	0.760078
891	ENSG00000164919	COX6C	-0.405116	0.759007
892	ENSG00000167967	E4F1	1.6384	0.758303
893	ENSG00000142207	URB1	0.118308	0.758027
894	ENSG00000115053	NCL	0.556744	0.75765
895	ENSG00000070882	OSBPL3	1.86857	0.755812
896	ENSG00000126432	PRDX5	0.834401	0.755435
897	ENSG00000198728	LDB1	3.80624	0.755383
898	ENSG00000131779	PEX11B	2.17823	0.75525
899	ENSG00000164574	GALNT10	1.794	0.754665
900	ENSG00000185475	TMEM179B	0.333475	0.752886
901	ENSG00000198825	INPP5F	0.861184	0.752797
902	ENSG00000147459	DOCK5	-0.00125411	0.752733
903	ENSG00000085832	EPS15	0.875617	0.752558
904	ENSG00000038427	VCAN	0.855738	0.751708
905	ENSG00000092439	TRPM7	0.297007	0.751162
906	ENSG00000128340	RAC2	3.54278	0.749862
907	ENSG00000101452	DHX35	2.26048	0.74981
908	ENSG00000072864	NDE1	1.62942	0.749287
909	ENSG00000174840	PDE12	-0.107254	0.748951
910	ENSG00000143324	XPR1	0.724844	0.748774
911	ENSG00000014919	COX15	1.02992	0.747439
912	ENSG00000157077	ZFYVE9	0.722072	0.746668
913	ENSG00000087274	ADD1	3.53451	0.746442
914	ENSG00000124839	RAB17	5.70551	0.746262
915	ENSG00000139116	KIF21A	1.95078	0.746229
916	ENSG00000113013	HSPA9	0.563038	0.746193
917	ENSG00000169188	APEX2	1.47249	0.746093
918	ENSG00000110455	ACCS	1.57128	0.744875
919	ENSG00000229117	RPL41	1.10597	0.743202
920	ENSG00000140319	SRP14	1.41166	0.74301
921	ENSG00000136631	VPS45	2.01315	0.742597
922	ENSG00000163104	SMARCAD1	2.26605	0.742465
923	ENSG00000146476	ARMT1	1.54054	0.741927
924	ENSG00000115946	PNO1	0.998777	0.741168
925	ENSG00000147383	NSDHL	1.88328	0.741059
926	ENSG00000109323	MANBA	-0.642316	0.740915
927	ENSG00000065357	DGKA	1.10418	0.740427
928	ENSG00000184216	IRAK1	1.73595	0.740162
929	ENSG00000159199	ATP5MC1	1.16852	0.739447
930	ENSG00000042753	AP2S1	2.32332	0.73937
931	ENSG00000124164	VAPB	1.5362	0.73932
932	ENSG00000069345	DNAJA2	1.62543	0.73914
933	ENSG00000132879	FBXO44	4.08906	0.738629
934	ENSG00000107372	ZFAND5	0.638417	0.738484
935	ENSG00000120159	CAAP1	2.11333	0.738283
936	ENSG00000151135	TMEM263	-0.0802555	0.738269
937	ENSG00000105171	POP4	0.238691	0.737855
938	ENSG00000131732	ZCCHC9	1.60076	0.737254
939	ENSG00000178921	PFAS	0.733109	0.737239
940	ENSG00000285043	AC093512.2	2.66393	0.736988
941	ENSG00000243725	TTC4	1.44676	0.736411
942	ENSG00000176393	RNPEP	2.5837	0.736244
943	ENSG00000117480	FAAH	1.56391	0.735957
944	ENSG00000177674	AGTRAP	0.432376	0.734457
945	ENSG00000116791	CRYZ	0.3616	0.734067
946	ENSG00000113716	HMGXB3	2.3952	0.734051
947	ENSG00000111231	GPN3	1.87189	0.733866
948	ENSG00000153140	CETN3	-0.0174163	0.7338
949	ENSG00000172269	DPAGT1	1.14324	0.733702
950	ENSG00000177853	ZNF518A	1.20912	0.733276
951	ENSG00000205629	LCMT1	3.51283	0.731706
952	ENSG00000167447	SMG8	3.42421	0.730929
953	ENSG00000231925	TAPBP	-0.713487	0.730816
954	ENSG00000100413	POLR3H	0.285319	0.730519
955	ENSG00000275221	H2AC15	0.296653	0.730191
956	ENSG00000198830	HMGN2	-0.0274317	0.729963
957	ENSG00000104299	INTS9	1.08506	0.729517
958	ENSG00000265303	AC099850.3	3.46698	0.728997
959	ENSG00000171960	PPIH	1.88163	0.728732
960	ENSG00000036054	TBC1D23	1.28801	0.728517
961	ENSG00000166200	COPS2	0.152926	0.728196
962	ENSG00000197448	GSTK1	1.54048	0.728021
963	ENSG00000171163	ZNF692	1.92055	0.727127
964	ENSG00000151694	ADAM17	2.33795	0.727027
965	ENSG00000130177	CDC16	2.39717	0.726614
966	ENSG00000173846	PLK3	4.2522	0.726245
967	ENSG00000101365	IDH3B	2.46519	0.725851
968	ENSG00000255439	AC135050.2	-0.0366528	0.72417
969	ENSG00000183718	TRIM52	0.00461918	0.724007
970	ENSG00000117592	PRDX6	1.81736	0.723744
971	ENSG00000273841	TAF9	0.468783	0.723684
972	ENSG00000154582	ELOC	0.383078	0.723441
973	ENSG00000155252	PI4K2A	1.31448	0.72296
974	ENSG00000143819	EPHX1	7.97456	0.722513
975	ENSG00000139842	CUL4A	1.25927	0.722429
976	ENSG00000038210	PI4K2B	1.27094	0.72213
977	ENSG00000171469	ZNF561	-0.810378	0.721971
978	ENSG00000068438	FTSJ1	0.925441	0.721821
979	ENSG00000143543	JTB	1.78884	0.721055
980	ENSG00000111364	DDX55	1.75321	0.720497
981	ENSG00000214736	TOMM6	1.38581	0.719975
982	ENSG00000163882	POLR2H	1.60925	0.719651
983	ENSG00000100330	MTMR3	1.21854	0.719342
984	ENSG00000127955	GNAI1	0.247341	0.719286
985	ENSG00000167306	MYO5B	2.36622	0.719257
986	ENSG00000158711	ELK4	1.22439	0.718754
987	ENSG00000077348	EXOSC5	2.28687	0.718734
988	ENSG00000130024	PHF10	0.927493	0.718348
989	ENSG00000258830	AC137834.1	-0.614139	0.718141
990	ENSG00000006634	DBF4	0.336942	0.71776
991	ENSG00000103168	TAF1C	2.72938	0.717253
992	ENSG00000164124	TMEM144	0.800595	0.717227
993	ENSG00000115234	SNX17	1.04632	0.717205
994	ENSG00000091164	TXNL1	0.697181	0.716372
995	ENSG00000131828	PDHA1	0.373727	0.715974
996	ENSG00000091651	ORC6	3.13689	0.715811
997	ENSG00000088038	CNOT3	1.96326	0.715636
998	ENSG00000154710	RABGEF1	2.37325	0.715576
999	ENSG00000148090	AUH	0.913429	0.715283
1000	ENSG00000127837	AAMP	1.93307	0.715267
1001	ENSG00000146109	ABT1	1.14054	0.714761
1002	ENSG00000119397	CNTRL	1.11566	0.714722
1003	ENSG00000142669	SH3BGRL3	1.5109	0.714333
1004	ENSG00000125485	DDX31	0.404279	0.713594
1005	ENSG00000179091	CYC1	1.6259	0.712508
1006	ENSG00000129472	RAB2B	2.64525	0.712466
1007	ENSG00000113971	NPHP3	2.37519	0.711475
1008	ENSG00000102974	CTCF	1.51719	0.711357
1009	ENSG00000183258	DDX41	1.62742	0.711288
1010	ENSG00000085840	ORC1	1.49603	0.710384
1011	ENSG00000182541	LIMK2	1.99657	0.709749
1012	ENSG00000125968	ID1	2.44305	0.709634
1013	ENSG00000121931	LRIF1	2.10639	0.709359
1014	ENSG00000197903	H2BC12	-0.0220589	0.708624
1015	ENSG00000131019	ULBP3	0.628653	0.707969
1016	ENSG00000088833	NSFL1C	1.70377	0.707164
1017	ENSG00000162236	STX5	1.6704	0.706962
1018	ENSG00000135245	HILPDA	0.970949	0.70636
1019	ENSG00000079459	FDFT1	1.91267	0.705944
1020	ENSG00000171295	ZNF440	0.430652	0.704906
1021	ENSG00000111640	GAPDH	0.558548	0.704504
1022	ENSG00000149084	HSD17B12	0.279768	0.704209
1023	ENSG00000095951	HIVEP1	1.56176	0.703995
1024	ENSG00000265241	RBM8A	-1.13648	0.703902
1025	ENSG00000105993	DNAJB6	1.90917	0.703873
1026	ENSG00000161249	DMKN	1.20687	0.702622
1027	ENSG00000267855	NDUFA7	0.457286	0.70236
1028	ENSG00000213931	HBE1	2.35664	0.701912
1029	ENSG00000178209	PLEC	3.03865	0.701682
1030	ENSG00000136045	PWP1	1.24545	0.70116
1031	ENSG00000167862	MRPL58	1.9449	0.701094
1032	ENSG00000196497	IPO4	1.96127	0.699541
1033	ENSG00000148331	ASB6	1.76297	0.697822
1034	ENSG00000145214	DGKQ	4.08832	0.697433
1035	ENSG00000075711	DLG1	0.725422	0.697321
1036	ENSG00000198160	MIER1	0.512679	0.696169
1037	ENSG00000109572	CLCN3	-0.480792	0.695638
1038	ENSG00000143476	DTL	0.36483	0.695441
1039	ENSG00000160113	NR2F6	2.37291	0.695267
1040	ENSG00000090889	KIF4A	1.93198	0.694924
1041	ENSG00000099889	ARVCF	-0.45699	0.693974
1042	ENSG00000173801	JUP	1.9163	0.693921
1043	ENSG00000162419	GMEB1	2.02672	0.693813
1044	ENSG00000119285	HEATR1	0.398712	0.693425
1045	ENSG00000171570	RAB4B-EGLN2	0.433427	0.692888
1046	ENSG00000003393	ALS2	2.15763	0.692667
1047	ENSG00000180901	KCTD2	1.2139	0.692309
1048	ENSG00000163191	S100A11	0.480981	0.690885
1049	ENSG00000118939	UCHL3	-0.716722	0.690834
1050	ENSG00000221983	UBA52	0.800989	0.690188
1051	ENSG00000155275	TRMT44	0.861027	0.689693
1052	ENSG00000178234	GALNT11	0.43393	0.68911
1053	ENSG00000007080	CCDC124	1.80978	0.688758
1054	ENSG00000134109	EDEM1	3.03781	0.687279
1055	ENSG00000197580	BCO2	0.340832	0.686519
1056	ENSG00000145022	TCTA	0.456092	0.68603
1057	ENSG00000138069	RAB1A	0.221125	0.685712
1058	ENSG00000170222	ADPRM	0.686134	0.68567
1059	ENSG00000114302	PRKAR2A	-0.0742791	0.684828
1060	ENSG00000160959	LRRC14	3.08409	0.68457
1061	ENSG00000174886	NDUFA11	4.06935	0.682188
1062	ENSG00000170043	TRAPPC1	2.52598	0.681324
1063	ENSG00000125870	SNRPB2	0.250012	0.680648
1064	ENSG00000185404	SP140L	0.449386	0.680354
1065	ENSG00000164442	CITED2	1.71941	0.679769
1066	ENSG00000237649	KIFC1	1.71725	0.679134
1067	ENSG00000005020	SKAP2	-0.356772	0.678954
1068	ENSG00000126391	FRMD8	2.98944	0.678157
1069	ENSG00000174483	BBS1	2.06464	0.678132
1070	ENSG00000256349	AP002748.5	2.06464	0.678132
1071	ENSG00000204576	PRR3	2.03375	0.677676
1072	ENSG00000188917	TRMT2B	0.0800373	0.677375
1073	ENSG00000096080	MRPS18A	1.24473	0.676381
1074	ENSG00000169174	PCSK9	1.53651	0.675071
1075	ENSG00000176340	COX8A	2.71689	0.674964
1076	ENSG00000131373	HACL1	-0.384997	0.67486
1077	ENSG00000177683	THAP5	-0.31061	0.673559
1078	ENSG00000059378	PARP12	2.32526	0.673291
1079	ENSG00000196235	SUPT5H	2.79965	0.673214
1080	ENSG00000197782	ZNF780A	1.0646	0.673026
1081	ENSG00000152700	SAR1B	2.05817	0.672162
1082	ENSG00000103035	PSMD7	2.20081	0.672067
1083	ENSG00000118418	HMGN3	1.9889	0.671951
1084	ENSG00000265354	TIMM23	1.09917	0.671395
1085	ENSG00000149925	ALDOA	2.56525	0.671218
1086	ENSG00000196923	PDLIM7	0.787553	0.670957
1087	ENSG00000167106	FAM102A	2.19608	0.670787
1088	ENSG00000161956	SENP3	1.08848	0.669818
1089	ENSG00000214087	ARL16	0.576182	0.669679
1090	ENSG00000160789	LMNA	1.92262	0.669652
1091	ENSG00000140943	MBTPS1	1.37283	0.668336
1092	ENSG00000178935	ZNF552	0.680375	0.667993
1093	ENSG00000269858	EGLN2	0.351519	0.66768
1094	ENSG00000023191	RNH1	1.41465	0.667567
1095	ENSG00000165156	ZHX1	1.02606	0.667488
1096	ENSG00000144645	OSBPL10	-0.290343	0.666844
1097	ENSG00000198056	PRIM1	0.268871	0.666521
1098	ENSG00000121892	PDS5A	0.0434682	0.666487
1099	ENSG00000165792	METTL17	3.31273	0.666454
1100	ENSG00000188229	TUBB4B	1.20684	0.66624
1101	ENSG00000165671	NSD1	2.43773	0.665396
1102	ENSG00000091317	CMTM6	0.754389	0.665184
1103	ENSG00000005194	CIAPIN1	1.91875	0.664691
1104	ENSG00000184117	NIPSNAP1	1.31364	0.663964
1105	ENSG00000159176	CSRP1	-0.32666	0.663851
1106	ENSG00000133895	MEN1	0.626967	0.663056
1107	ENSG00000138794	CASP6	0.220285	0.662713
1108	ENSG00000137309	HMGA1	2.05971	0.660544
1109	ENSG00000158528	PPP1R9A	2.55601	0.660541
1110	ENSG00000166575	TMEM135	0.873432	0.660509
1111	ENSG00000113597	TRAPPC13	1.55909	0.659059
1112	ENSG00000188986	NELFB	1.77736	0.657408
1113	ENSG00000088682	COQ9	1.02379	0.657076
1114	ENSG00000119392	GLE1	1.43603	0.656055
1115	ENSG00000262814	MRPL12	0.100817	0.655527
1116	ENSG00000107581	EIF3A	0.684195	0.654242
1117	ENSG00000170852	KBTBD2	2.28732	0.653504
1118	ENSG00000130770	ATP5IF1	-1.34609	0.652993
1119	ENSG00000187051	RPS19BP1	1.35541	0.652976
1120	ENSG00000118217	ATF6	1.42031	0.652924
1121	ENSG00000134909	ARHGAP32	3.17056	0.652591
1122	ENSG00000115020	PIKFYVE	1.67424	0.652354
1123	ENSG00000125691	RPL23	-0.0970772	0.651587
1124	ENSG00000104218	CSPP1	1.85469	0.650255
1125	ENSG00000159596	TMEM69	0.898903	0.649297
1126	ENSG00000113732	ATP6V0E1	-0.600383	0.649062
1127	ENSG00000129084	PSMA1	1.55842	0.648923
1128	ENSG00000088280	ASAP3	2.23185	0.647527
1129	ENSG00000140400	MAN2C1	1.97546	0.647255
1130	ENSG00000119812	FAM98A	0.543423	0.646683
1131	ENSG00000142657	PGD	1.91563	0.646544
1132	ENSG00000205758	CRYZL1	-0.436461	0.646494
1133	ENSG00000139725	RHOF	1.93417	0.64593
1134	ENSG00000085872	CHERP	3.36469	0.645632
1135	ENSG00000102738	MRPS31	1.45626	0.645506
1136	ENSG00000166669	ATF7IP2	0.18918	0.644508
1137	ENSG00000175573	C11orf68	0.926072	0.643969
1138	ENSG00000130227	XPO7	1.82719	0.643387
1139	ENSG00000167325	RRM1	1.46969	0.642287
1140	ENSG00000021355	SERPINB1	1.42008	0.641778
1141	ENSG00000221988	PPT2	0.0185221	0.640457
1142	ENSG00000203791	EEF1AKMT2	-0.257217	0.639566
1143	ENSG00000134318	ROCK2	1.67635	0.639524
1144	ENSG00000181555	SETD2	1.93694	0.639439
1145	ENSG00000153827	TRIP12	1.25303	0.639406
1146	ENSG00000111237	VPS29	1.27143	0.639399
1147	ENSG00000169710	FASN	9.63973	0.639226
1148	ENSG00000100104	SRRD	-0.0291448	0.638929
1149	ENSG00000112742	TTK	2.31969	0.638286
1150	ENSG00000133195	SLC39A11	2.18364	0.638181
1151	ENSG00000128626	MRPS12	1.27868	0.637427
1152	ENSG00000198863	RUNDC1	1.91925	0.637213
1153	ENSG00000161021	MAML1	1.97476	0.637118
1154	ENSG00000163755	HPS3	0.744599	0.636728
1155	ENSG00000127328	RAB3IP	0.677414	0.636332
1156	ENSG00000165171	METTL27	-0.422352	0.63631
1157	ENSG00000100949	RABGGTA	3.40067	0.635448
1158	ENSG00000189046	ALKBH2	3.65139	0.635357
1159	ENSG00000149196	HIKESHI	1.72901	0.635126
1160	ENSG00000284292	AC004922.1	-0.117535	0.635067
1161	ENSG00000116489	CAPZA1	2.04336	0.6344
1162	ENSG00000127774	EMC6	1.4439	0.634052
1163	ENSG00000196154	S100A4	2.09108	0.634046
1164	ENSG00000139977	NAA30	1.21143	0.634042
1165	ENSG00000141295	SCRN2	0.556831	0.633579
1166	ENSG00000136888	ATP6V1G1	0.485225	0.633214
1167	ENSG00000104897	SF3A2	1.57672	0.632815
1168	ENSG00000085274	MYNN	0.107745	0.632626
1169	ENSG00000175602	CCDC85B	-0.815826	0.632018
1170	ENSG00000175215	CTDSP2	2.48268	0.631987
1171	ENSG00000180891	CUEDC1	2.13553	0.631857
1172	ENSG00000080822	CLDND1	0.856467	0.631395
1173	ENSG00000178980	SELENOW	2.39859	0.631392
1174	ENSG00000163608	NEPRO	0.956044	0.631343
1175	ENSG00000130703	OSBPL2	1.52546	0.630925
1176	ENSG00000145388	METTL14	0.968257	0.630525
1177	ENSG00000215845	TSTD1	0.124221	0.630414
1178	ENSG00000075945	KIFAP3	0.0478777	0.629597
1179	ENSG00000127540	UQCR11	0.83621	0.629282
1180	ENSG00000167644	C19orf33	1.53799	0.629208
1181	ENSG00000164074	ABHD18	0.390562	0.629011
1182	ENSG00000132463	GRSF1	1.26098	0.628801
1183	ENSG00000115998	C2orf42	1.86831	0.628435
1184	ENSG00000144214	LYG1	1.87	0.628401
1185	ENSG00000149485	FADS1	0.668624	0.628086
1186	ENSG00000184162	NR2C2AP	1.94309	0.627498
1187	ENSG00000196526	AFAP1	2.69806	0.626847
1188	ENSG00000175970	UNC119B	3.34881	0.624887
1189	ENSG00000038532	CLEC16A	2.64154	0.623485
1190	ENSG00000162408	NOL9	2.1605	0.623331
1191	ENSG00000136144	RCBTB1	0.749035	0.623155
1192	ENSG00000273559	CWC25	1.62267	0.623095
1193	ENSG00000120690	ELF1	0.440611	0.623069
1194	ENSG00000117153	KLHL12	1.17012	0.622629
1195	ENSG00000163956	LRPAP1	1.30481	0.62224
1196	ENSG00000137819	PAQR5	1.42463	0.622184
1197	ENSG00000170445	HARS1	0.209017	0.621407
1198	ENSG00000077514	POLD3	0.465299	0.620651
1199	ENSG00000160055	TMEM234	-0.818931	0.620247
1200	ENSG00000105518	TMEM205	1.8934	0.619681
1201	ENSG00000101109	STK4	2.47689	0.618688
1202	ENSG00000142949	PTPRF	1.09318	0.616858
1203	ENSG00000167792	NDUFV1	2.5412	0.616711
1204	ENSG00000092871	RFFL	0.224588	0.616201
1205	ENSG00000125356	NDUFA1	1.69841	0.616099
1206	ENSG00000132522	GPS2	1.21743	0.615889
1207	ENSG00000143862	ARL8A	2.65343	0.615545
1208	ENSG00000214954	LRRC69	0.0238607	0.615344
1209	ENSG00000188566	NDOR1	1.07028	0.615329
1210	ENSG00000185009	AP3M1	1.0542	0.615015
1211	ENSG00000136937	NCBP1	0.837023	0.61489
1212	ENSG00000011143	MKS1	1.29535	0.614407
1213	ENSG00000165650	PDZD8	0.870377	0.614163
1214	ENSG00000112685	EXOC2	2.13459	0.614004
1215	ENSG00000131725	WDR44	1.97268	0.613406
1216	ENSG00000140105	WARS1	1.15679	0.61334
1217	ENSG00000174373	RALGAPA1	0.437477	0.612923
1218	ENSG00000105671	DDX49	-0.596876	0.61272
1219	ENSG00000180357	ZNF609	1.01061	0.61216
1220	ENSG00000135778	NTPCR	1.15042	0.611986
1221	ENSG00000101146	RAE1	1.48235	0.611724
1222	ENSG00000143498	TAF1A	0.286976	0.611307
1223	ENSG00000141627	DYM	1.06164	0.611042
1224	ENSG00000196678	ERI2	-0.106167	0.610876
1225	ENSG00000007341	ST7L	0.197303	0.610872
1226	ENSG00000143155	TIPRL	1.02619	0.610753
1227	ENSG00000137124	ALDH1B1	0.409564	0.610144
1228	ENSG00000140694	PARN	2.11348	0.609873
1229	ENSG00000177885	GRB2	2.05953	0.609715
1230	ENSG00000102081	FMR1	-0.309124	0.609263
1231	ENSG00000163348	PYGO2	4.5141	0.608887
1232	ENSG00000073536	NLE1	1.72953	0.60808
1233	ENSG00000197150	ABCB8	1.76629	0.608033
1234	ENSG00000172830	SSH3	2.97057	0.608008
1235	ENSG00000083750	RRAGB	0.886799	0.607944
1236	ENSG00000189241	TSPYL1	-0.887876	0.606387
1237	ENSG00000023287	RB1CC1	0.479127	0.606366
1238	ENSG00000008018	PSMB1	2.57902	0.60529
1239	ENSG00000185651	UBE2L3	1.33028	0.605033
1240	ENSG00000178741	COX5A	0.863426	0.604158
1241	ENSG00000198898	CAPZA2	-2.08376	0.603858
1242	ENSG00000116221	MRPL37	-0.307706	0.603434
1243	ENSG00000124226	RNF114	2.23022	0.603156
1244	ENSG00000145919	BOD1	1.10221	0.602665
1245	ENSG00000160688	FLAD1	4.2718	0.602057
1246	ENSG00000137628	DDX60	0.90504	0.601766
1247	ENSG00000264522	OTUD7B	1.54547	0.601647
1248	ENSG00000148943	LIN7C	0.50431	0.601356
1249	ENSG00000172046	USP19	3.34387	0.60131
1250	ENSG00000186187	ZNRF1	0.774126	0.600961
1251	ENSG00000138029	HADHB	1.82385	0.599886
1252	ENSG00000115268	RPS15	2.52895	0.59952
1253	ENSG00000042088	TDP1	1.50664	0.599242
1254	ENSG00000119048	UBE2B	0.295002	0.599006
1255	ENSG00000100028	SNRPD3	0.65156	0.597759
1256	ENSG00000237765	FAM200B	0.0462916	0.597681
1257	ENSG00000225830	ERCC6	-0.140772	0.596768
1258	ENSG00000101421	CHMP4B	1.44741	0.596705
1259	ENSG00000116459	ATP5PB	0.296189	0.596004
1260	ENSG00000198258	UBL5	1.10308	0.595748
1261	ENSG00000169738	DCXR	1.03443	0.595045
1262	ENSG00000247596	TWF2	5.54563	0.594752
1263	ENSG00000196924	FLNA	3.77521	0.594177
1264	ENSG00000091732	ZC3HC1	1.40592	0.593571
1265	ENSG00000140391	TSPAN3	-1.24467	0.593274
1266	ENSG00000197157	SND1	2.47183	0.591298
1267	ENSG00000164118	CEP44	-1.90908	0.591134
1268	ENSG00000145220	LYAR	1.60737	0.590827
1269	ENSG00000213930	GALT	-0.0474134	0.590432
1270	ENSG00000087263	OGFOD1	-0.682057	0.588268
1271	ENSG00000157502	PWWP3B	1.49012	0.588178
1272	ENSG00000180573	H2AC6	1.95043	0.588065
1273	ENSG00000129667	RHBDF2	1.87548	0.587702
1274	ENSG00000278463	H2AC4	-0.0802181	0.587536
1275	ENSG00000143158	MPC2	0.703029	0.587267
1276	ENSG00000083093	PALB2	2.3033	0.587251
1277	ENSG00000109065	NAT9	2.32848	0.58686
1278	ENSG00000246922	UBAP1L	1.32756	0.586854
1279	ENSG00000122692	SMU1	1.14186	0.586677
1280	ENSG00000107175	CREB3	1.22746	0.586345
1281	ENSG00000175348	TMEM9B	-0.0403563	0.586288
1282	ENSG00000159374	M1AP	0.89847	0.586168
1283	ENSG00000116863	ADPRHL2	2.29649	0.586141
1284	ENSG00000157426	AASDH	2.97361	0.585967
1285	ENSG00000056736	IL17RB	0.573514	0.585894
1286	ENSG00000052126	PLEKHA5	2.32944	0.585011
1287	ENSG00000121957	GPSM2	0.623305	0.584603
1288	ENSG00000197746	PSAP	1.9734	0.584462
1289	ENSG00000090989	EXOC1	3.47726	0.584452
1290	ENSG00000104660	LEPROTL1	0.154982	0.583695
1291	ENSG00000261236	BOP1	-0.0342905	0.583028
1292	ENSG00000240891	PLCXD2	0.0525941	0.582894
1293	ENSG00000119414	PPP6C	1.40744	0.582873
1294	ENSG00000171241	SHCBP1	1.45744	0.582373
1295	ENSG00000111321	LTBR	0.671549	0.58206
1296	ENSG00000022277	RTF2	0.989317	0.58166
1297	ENSG00000037637	FBXO42	1.86094	0.580793
1298	ENSG00000167770	OTUB1	-0.681346	0.58071
1299	ENSG00000169871	TRIM56	1.89233	0.580288
1300	ENSG00000241685	ARPC1A	1.1272	0.580042
1301	ENSG00000105701	FKBP8	2.16995	0.57986
1302	ENSG00000188290	HES4	-0.192645	0.579614
1303	ENSG00000276293	PIP4K2B	3.7135	0.579524
1304	ENSG00000184260	H2AC20	0.269063	0.579086
1305	ENSG00000213619	NDUFS3	3.04539	0.578357
1306	ENSG00000134444	RELCH	0.067119	0.578271
1307	ENSG00000140545	MFGE8	-0.235418	0.578063
1308	ENSG00000168924	LETM1	1.93817	0.577507
1309	ENSG00000130204	TOMM40	2.86074	0.576218
1310	ENSG00000275342	PRAG1	2.57469	0.576154
1311	ENSG00000127554	GFER	1.10965	0.575619
1312	ENSG00000150457	LATS2	2.24913	0.57557
1313	ENSG00000228144	AC078927.1	0.401561	0.575524
1314	ENSG00000160336	ZNF761	2.36419	0.575442
1315	ENSG00000166275	BORCS7	0.492513	0.574256
1316	ENSG00000106244	PDAP1	0.790319	0.5735
1317	ENSG00000256591	AP003108.2	4.27336	0.573182
1318	ENSG00000148334	PTGES2	-1.39489	0.573093
1319	ENSG00000076321	KLHL20	0.227684	0.572643
1320	ENSG00000134247	PTGFRN	1.96212	0.571734
1321	ENSG00000139722	VPS37B	2.2212	0.571733
1322	ENSG00000133943	DGLUCY	1.63073	0.571565
1323	ENSG00000106692	FKTN	1.38087	0.571479
1324	ENSG00000110315	RNF141	0.604438	0.569961
1325	ENSG00000100014	SPECC1L	0.484078	0.56988
1326	ENSG00000132470	ITGB4	2.11889	0.569406
1327	ENSG00000108953	YWHAE	2.29325	0.569191
1328	ENSG00000169733	RFNG	3.89996	0.569162
1329	ENSG00000099917	MED15	2.34004	0.569052
1330	ENSG00000115947	ORC4	0.951906	0.568796
1331	ENSG00000089597	GANAB	2.78539	0.567666
1332	ENSG00000151092	NGLY1	2.41122	0.567434
1333	ENSG00000142634	EFHD2	0.907192	0.567342
1334	ENSG00000125386	FAM193A	2.2419	0.567196
1335	ENSG00000242247	ARFGAP3	1.02523	0.56693
1336	ENSG00000198887	SMC5	0.86296	0.566452
1337	ENSG00000115204	MPV17	1.21246	0.565634
1338	ENSG00000104312	RIPK2	0.910563	0.56536
1339	ENSG00000162869	PPP1R21	1.27657	0.564861
1340	ENSG00000274997	H2AC12	-0.0772278	0.564555
1341	ENSG00000166886	NAB2	4.02574	0.564522
1342	ENSG00000122643	NT5C3A	0.7513	0.56263
1343	ENSG00000259332	ST20-MTHFS	0.767853	0.561692
1344	ENSG00000117758	STX12	0.84626	0.561455
1345	ENSG00000167702	KIFC2	1.28066	0.561255
1346	ENSG00000144744	UBA3	2.62135	0.560965
1347	ENSG00000103495	MAZ	2.32565	0.560792
1348	ENSG00000171314	PGAM1	2.0349	0.560747
1349	ENSG00000088832	FKBP1A	1.22928	0.560628
1350	ENSG00000162928	PEX13	0.648453	0.560612
1351	ENSG00000066739	ATG2B	-0.673337	0.560064
1352	ENSG00000171865	RNASEH1	2.64111	0.559212
1353	ENSG00000106028	SSBP1	-0.151633	0.558474
1354	ENSG00000145390	USP53	1.93895	0.558171
1355	ENSG00000196704	AMZ2	3.41441	0.558033
1356	ENSG00000122884	P4HA1	1.59139	0.557919
1357	ENSG00000278637	H4C1	0.132877	0.557848
1358	ENSG00000196396	PTPN1	-0.24108	0.55564
1359	ENSG00000136936	XPA	0.367883	0.555239
1360	ENSG00000167283	ATP5MG	0.119854	0.555181
1361	ENSG00000163867	ZMYM6	0.942914	0.55426
1362	ENSG00000164961	WASHC5	2.36863	0.553887
1363	ENSG00000239900	ADSL	0.0934447	0.553349
1364	ENSG00000078142	PIK3C3	1.2267	0.553339
1365	ENSG00000168038	ULK4	0.906179	0.552954
1366	ENSG00000103051	COG4	1.76004	0.552597
1367	ENSG00000065923	SLC9A7	1.45302	0.552531
1368	ENSG00000160818	GPATCH4	1.50376	0.552489
1369	ENSG00000152484	USP12	1.47499	0.552139
1370	ENSG00000076382	SPAG5	3.79792	0.551438
1371	ENSG00000136560	TANK	1.82822	0.550143
1372	ENSG00000111780	AL021546.1	-0.272701	0.55009
1373	ENSG00000109686	SH3D19	0.562923	0.549833
1374	ENSG00000138119	MYOF	3.59841	0.549671
1375	ENSG00000100029	PES1	1.91253	0.549229
1376	ENSG00000119383	PTPA	2.12738	0.548994
1377	ENSG00000110583	NAA40	0.651167	0.54858
1378	ENSG00000114923	SLC4A3	2.19132	0.548558
1379	ENSG00000186193	SAPCD2	2.15726	0.548177
1380	ENSG00000116514	RNF19B	1.66162	0.548133
1381	ENSG00000119403	PHF19	2.29441	0.54801
1382	ENSG00000186010	NDUFA13	-0.925644	0.547237
1383	ENSG00000152291	TGOLN2	0.0580581	0.547137
1384	ENSG00000137996	RTCA	2.14313	0.547005
1385	ENSG00000120049	KCNIP2	0.284747	0.546349
1386	ENSG00000111581	NUP107	-0.0874895	0.546098
1387	ENSG00000153310	FAM49B	0.279411	0.546012
1388	ENSG00000164080	RAD54L2	2.42684	0.545932
1389	ENSG00000083123	BCKDHB	-0.364404	0.545612
1390	ENSG00000086015	MAST2	1.34873	0.545612
1391	ENSG00000160299	PCNT	1.46671	0.545568
1392	ENSG00000084234	APLP2	1.62457	0.545403
1393	ENSG00000177971	IMP3	2.03754	0.545186
1394	ENSG00000197081	IGF2R	-1.17071	0.544388
1395	ENSG00000135018	UBQLN1	1.82492	0.544184
1396	ENSG00000130724	CHMP2A	2.45722	0.544179
1397	ENSG00000126226	PCID2	1.68658	0.543926
1398	ENSG00000164649	CDCA7L	0.717964	0.543064
1399	ENSG00000007866	TEAD3	1.68097	0.54217
1400	ENSG00000142507	PSMB6	0.933482	0.541906
1401	ENSG00000092330	TINF2	-0.157861	0.541552
1402	ENSG00000107404	DVL1	0.846991	0.54083
1403	ENSG00000107223	EDF1	1.15605	0.540773
1404	ENSG00000181789	COPG1	1.96488	0.540616
1405	ENSG00000140650	PMM2	1.19448	0.540189
1406	ENSG00000168894	RNF181	0.470427	0.539705
1407	ENSG00000117751	PPP1R8	3.48154	0.539603
1408	ENSG00000114686	MRPL3	0.244752	0.539554
1409	ENSG00000021776	AQR	1.2392	0.539416
1410	ENSG00000004059	ARF5	2.02975	0.538704
1411	ENSG00000165416	SUGT1	1.41799	0.537932
1412	ENSG00000104805	NUCB1	1.90748	0.537911
1413	ENSG00000130477	UNC13A	2.38982	0.537799
1414	ENSG00000115207	GTF3C2	2.41989	0.53714
1415	ENSG00000243749	TMEM35B	0.504046	0.537056
1416	ENSG00000133026	MYH10	0.616486	0.536977
1417	ENSG00000271741	AC114490.2	0.502867	0.536972
1418	ENSG00000080819	CPOX	1.80311	0.536085
1419	ENSG00000153774	CFDP1	1.48119	0.534389
1420	ENSG00000160310	PRMT2	1.78076	0.534279
1421	ENSG00000119431	HDHD3	1.53589	0.534002
1422	ENSG00000108826	MRPL27	0.882927	0.533468
1423	ENSG00000095383	TBC1D2	1.32534	0.533339
1424	ENSG00000285064	SMIM40	0.335227	0.532973
1425	ENSG00000133818	RRAS2	1.40941	0.532436
1426	ENSG00000205268	PDE7A	1.45787	0.531418
1427	ENSG00000130766	SESN2	3.41275	0.531376
1428	ENSG00000120742	SERP1	1.50508	0.530855
1429	ENSG00000197956	S100A6	1.74084	0.530852
1430	ENSG00000085185	BCORL1	1.58072	0.530338
1431	ENSG00000176973	FAM89B	0.317289	0.530175
1432	ENSG00000167658	EEF2	2.40699	0.529782
1433	ENSG00000262526	AC120057.2	1.82607	0.529141
1434	ENSG00000204498	NFKBIL1	3.41511	0.529125
1435	ENSG00000108669	CYTH1	2.95318	0.528503
1436	ENSG00000148985	PGAP2	1.92091	0.528248
1437	ENSG00000105953	OGDH	2.61493	0.528066
1438	ENSG00000125731	SH2D3A	2.15872	0.526379
1439	ENSG00000037474	NSUN2	2.44002	0.526203
1440	ENSG00000205730	ITPRIPL2	1.99228	0.525389
1441	ENSG00000146918	NCAPG2	0.71827	0.524989
1442	ENSG00000130772	MED18	2.35757	0.52474
1443	ENSG00000181610	MRPS23	1.45121	0.523652
1444	ENSG00000122515	ZMIZ2	1.49222	0.523311
1445	ENSG00000105677	TMEM147	1.2651	0.523088
1446	ENSG00000168970	JMJD7-PLA2G4B	1.26945	0.522507
1447	ENSG00000135823	STX6	0.867542	0.521801
1448	ENSG00000182372	CLN8	-1.29022	0.521721
1449	ENSG00000254505	CHMP4A	1.17785	0.521425
1450	ENSG00000149262	INTS4	1.24626	0.521294
1451	ENSG00000100442	FKBP3	0.0130319	0.520885
1452	ENSG00000115687	PASK	3.44235	0.520851
1453	ENSG00000215193	PEX26	0.882821	0.520283
1454	ENSG00000096433	ITPR3	2.65996	0.520219
1455	ENSG00000103111	MON1B	3.4283	0.519943
1456	ENSG00000168116	KIAA1586	1.51675	0.519934
1457	ENSG00000167460	TPM4	2.99065	0.519893
1458	ENSG00000162819	BROX	2.77042	0.519669
1459	ENSG00000168092	PAFAH1B2	-0.323561	0.519357
1460	ENSG00000213246	SUPT4H1	2.00618	0.519066
1461	ENSG00000133422	MORC2	0.924893	0.518723
1462	ENSG00000169299	PGM2	0.587286	0.51871
1463	ENSG00000100483	VCPKMT	1.74181	0.517896
1464	ENSG00000135624	CCT7	2.43535	0.517599
1465	ENSG00000253251	SHLD3	-0.461248	0.517502
1466	ENSG00000106803	SEC61B	1.97661	0.517325
1467	ENSG00000131844	MCCC2	0.408558	0.515551
1468	ENSG00000165868	HSPA12A	1.56474	0.514712
1469	ENSG00000242372	EIF6	1.63508	0.514672
1470	ENSG00000164163	ABCE1	1.93633	0.514415
1471	ENSG00000106086	PLEKHA8	0.0810483	0.51428
1472	ENSG00000127080	IPPK	1.14335	0.514001
1473	ENSG00000084623	EIF3I	2.79669	0.513747
1474	ENSG00000172354	GNB2	2.06578	0.513424
1475	ENSG00000134222	PSRC1	2.37483	0.513092
1476	ENSG00000141384	TAF4B	1.22432	0.512734
1477	ENSG00000087269	NOP14	1.54071	0.51264
1478	ENSG00000175106	TVP23C	0.567718	0.512549
1479	ENSG00000161638	ITGA5	3.04381	0.510477
1480	ENSG00000198586	TLK1	0.433669	0.509852
1481	ENSG00000132912	DCTN4	1.8223	0.509736
1482	ENSG00000168476	REEP4	0.794786	0.509169
1483	ENSG00000138778	CENPE	0.3976	0.509041
1484	ENSG00000103266	STUB1	-1.77376	0.507596
1485	ENSG00000101247	NDUFAF5	1.82299	0.507017
1486	ENSG00000129173	E2F8	2.76777	0.506943
1487	ENSG00000164659	KIAA1324L	0.0593947	0.506903
1488	ENSG00000115295	CLIP4	0.227738	0.505928
1489	ENSG00000035499	DEPDC1B	0.948941	0.505571
1490	ENSG00000173933	RBM4	1.34456	0.505312
1491	ENSG00000166169	POLL	1.27706	0.504783
1492	ENSG00000143198	MGST3	1.53574	0.504558
1493	ENSG00000280537	AC068946.1	0.588867	0.50381
1494	ENSG00000107438	PDLIM1	0.880353	0.503327
1495	ENSG00000033867	SLC4A7	1.68642	0.501266
1496	ENSG00000109171	SLAIN2	0.193414	0.501102
1497	ENSG00000136527	TRA2B	0.155922	0.500868
1498	ENSG00000117899	MESD	0.34815	0.500844
1499	ENSG00000070614	NDST1	2.45807	0.500192
1500	ENSG00000080345	RIF1	-0.155772	0.499589
1501	ENSG00000139168	ZCRB1	0.461791	0.499117
1502	ENSG00000108100	CCNY	0.994072	0.497722
1503	ENSG00000047188	YTHDC2	1.87759	0.497655
1504	ENSG00000144747	TMF1	1.19077	0.497247
1505	ENSG00000121058	COIL	3.03576	0.497117
1506	ENSG00000101160	CTSZ	0.520589	0.497044
1507	ENSG00000102362	SYTL4	0.687955	0.496576
1508	ENSG00000137216	TMEM63B	2.18958	0.496473
1509	ENSG00000107651	SEC23IP	0.152651	0.49631
1510	ENSG00000175130	MARCKSL1	-0.307889	0.495857
1511	ENSG00000148468	FAM171A1	2.14729	0.495809
1512	ENSG00000204463	BAG6	1.91397	0.494635
1513	ENSG00000273217	AC008695.1	-0.0259214	0.49445
1514	ENSG00000135930	EIF4E2	1.42199	0.494424
1515	ENSG00000006453	BAIAP2L1	1.16363	0.494142
1516	ENSG00000119421	NDUFA8	1.27798	0.493972
1517	ENSG00000065361	ERBB3	3.71524	0.4937
1518	ENSG00000104419	NDRG1	2.71206	0.492882
1519	ENSG00000177311	ZBTB38	0.867155	0.492838
1520	ENSG00000170581	STAT2	1.69778	0.492804
1521	ENSG00000139405	RITA1	1.4246	0.492162
1522	ENSG00000124383	MPHOSPH10	1.7151	0.49212
1523	ENSG00000006025	OSBPL7	4.49149	0.492071
1524	ENSG00000184056	VPS33B	0.564907	0.491986
1525	ENSG00000171219	CDC42BPG	0.813175	0.491934
1526	ENSG00000064102	INTS13	1.07857	0.491878
1527	ENSG00000148356	LRSAM1	2	0.49178
1528	ENSG00000198131	ZNF544	-0.562985	0.491179
1529	ENSG00000132275	RRP8	-0.126148	0.490798
1530	ENSG00000115738	ID2	0.860676	0.489916
1531	ENSG00000288529	AL035699.1	0.10014	0.489568
1532	ENSG00000163320	CGGBP1	2.55996	0.488912
1533	ENSG00000139636	LMBR1L	1.73696	0.487987
1534	ENSG00000167130	DOLPP1	2.19429	0.487709
1535	ENSG00000119778	ATAD2B	0.504785	0.487577
1536	ENSG00000188725	SMIM15	0.0998135	0.487229
1537	ENSG00000168646	AXIN2	3.94668	0.48719
1538	ENSG00000129680	MAP7D3	0.195708	0.487086
1539	ENSG00000116649	SRM	1.20058	0.486568
1540	ENSG00000163584	RPL22L1	2.01414	0.486401
1541	ENSG00000084207	GSTP1	1.5196	0.486376
1542	ENSG00000180071	ANKRD18A	1.15404	0.486328
1543	ENSG00000006015	REX1BD	0.879316	0.485805
1544	ENSG00000146701	MDH2	0.600969	0.485608
1545	ENSG00000286224	AP000471.1	-0.864989	0.485557
1546	ENSG00000139370	SLC15A4	0.599626	0.485529
1547	ENSG00000205464	ATP6AP1L	0.312386	0.485439
1548	ENSG00000196850	PPTC7	1.34348	0.485182
1549	ENSG00000164066	INTU	1.22706	0.48505
1550	ENSG00000129534	MIS18BP1	1.03288	0.484754
1551	ENSG00000212907	MT-ND4L	0.0293752	0.484502
1552	ENSG00000162063	CCNF	5.29744	0.483966
1553	ENSG00000141349	G6PC3	0.00306719	0.481745
1554	ENSG00000132199	ENOSF1	2.89828	0.48172
1555	ENSG00000198551	ZNF627	2.70366	0.4814
1556	ENSG00000101266	CSNK2A1	1.26271	0.481123
1557	ENSG00000126934	MAP2K2	2.16937	0.480788
1558	ENSG00000263809	AC135178.3	-0.0100976	0.480735
1559	ENSG00000169217	CD2BP2	1.49996	0.480644
1560	ENSG00000126267	COX6B1	2.68118	0.480283
1561	ENSG00000107959	PITRM1	-0.0453406	0.4802
1562	ENSG00000148358	GPR107	2.92547	0.480184
1563	ENSG00000135900	MRPL44	2.84112	0.480086
1564	ENSG00000243056	EIF4EBP3	1.97632	0.480039
1565	ENSG00000146350	TBC1D32	0.812596	0.479733
1566	ENSG00000174891	RSRC1	2.08405	0.479725
1567	ENSG00000226479	TMEM185B	1.77373	0.479045
1568	ENSG00000197324	LRP10	5.25069	0.478864
1569	ENSG00000108528	SLC25A11	0.510284	0.478809
1570	ENSG00000125651	GTF2F1	1.39783	0.478771
1571	ENSG00000130702	LAMA5	0.238128	0.478735
1572	ENSG00000070010	UFD1	0.680199	0.47752
1573	ENSG00000255302	EID1	1.67277	0.476789
1574	ENSG00000105983	LMBR1	0.630866	0.47637
1575	ENSG00000136718	IMP4	1.16347	0.476243
1576	ENSG00000011566	MAP4K3	1.8416	0.475543
1577	ENSG00000135999	EPC2	0.839514	0.475506
1578	ENSG00000180376	CCDC66	1.70881	0.4752
1579	ENSG00000134108	ARL8B	1.05769	0.474888
1580	ENSG00000197061	H4C3	-0.514196	0.474231
1581	ENSG00000254996	ANKHD1-EIF4EBP3	1.98187	0.474189
1582	ENSG00000167900	TK1	0.751373	0.473863
1583	ENSG00000162702	ZNF281	2.10602	0.473273
1584	ENSG00000227345	PARG	2.50127	0.473077
1585	ENSG00000267748	AC011479.2	0.381301	0.472952
1586	ENSG00000288208	AL451136.1	2.01232	0.472783
1587	ENSG00000116688	MFN2	2.33827	0.472684
1588	ENSG00000100412	ACO2	3.64407	0.472011
1589	ENSG00000107984	DKK1	1.09798	0.471941
1590	ENSG00000109084	TMEM97	0.907593	0.471784
1591	ENSG00000141428	C18orf21	1.00441	0.471446
1592	ENSG00000166037	CEP57	2.03755	0.470721
1593	ENSG00000115806	GORASP2	1.63252	0.469203
1594	ENSG00000102572	STK24	-1.79028	0.469079
1595	ENSG00000170734	POLH	1.5661	0.468105
1596	ENSG00000186635	ARAP1	1.06518	0.467701
1597	ENSG00000111596	CNOT2	1.30143	0.467162
1598	ENSG00000146282	RARS2	0.49604	0.467126
1599	ENSG00000166261	ZNF202	0.898132	0.466149
1600	ENSG00000152223	EPG5	1.43653	0.465777
1601	ENSG00000247626	MARS2	2.17151	0.465531
1602	ENSG00000172939	OXSR1	1.86138	0.465188
1603	ENSG00000108523	RNF167	0.282067	0.464921
1604	ENSG00000139436	GIT2	3.15232	0.464789
1605	ENSG00000109685	NSD2	3.39654	0.464668
1606	ENSG00000124635	H2BC11	1.59792	0.464382
1607	ENSG00000100445	SDR39U1	0.907064	0.464127
1608	ENSG00000114956	DGUOK	2.06328	0.463863
1609	ENSG00000135241	PNPLA8	0.298161	0.463749
1610	ENSG00000170296	GABARAP	3.04035	0.463434
1611	ENSG00000172301	COPRS	1.12016	0.463422
1612	ENSG00000143379	SETDB1	1.35636	0.46317
1613	ENSG00000168769	TET2	1.60229	0.462464
1614	ENSG00000137842	TMEM62	-0.0740175	0.462443
1615	ENSG00000150776	NKAPD1	1.29428	0.462111
1616	ENSG00000175606	TMEM70	-0.110494	0.461945
1617	ENSG00000254470	AP5B1	0.799669	0.461853
1618	ENSG00000197070	ARRDC1	1.66831	0.461422
1619	ENSG00000276966	H4C5	-0.246859	0.461359
1620	ENSG00000120451	SNX19	0.0309717	0.461176
1621	ENSG00000172175	MALT1	0.581013	0.461114
1622	ENSG00000082641	NFE2L1	0.146199	0.4611
1623	ENSG00000182872	RBM10	0.49939	0.460594
1624	ENSG00000171574	ZNF584	0.352406	0.460573
1625	ENSG00000007923	DNAJC11	0.701206	0.460504
1626	ENSG00000034693	PEX3	0.0431322	0.460443
1627	ENSG00000177225	GATD1	1.67771	0.46009
1628	ENSG00000170190	SLC16A5	0.506224	0.459873
1629	ENSG00000132963	POMP	1.27819	0.459832
1630	ENSG00000214078	CPNE1	3.05729	0.459454
1631	ENSG00000125534	PPDPF	0.151327	0.45944
1632	ENSG00000278619	MRM1	1.04003	0.459414
1633	ENSG00000270800	RPS10-NUDT3	0.171599	0.459177
1634	ENSG00000162244	RPL29	1.81588	0.459075
1635	ENSG00000283189	AC104452.1	1.02736	0.458772
1636	ENSG00000256966	AL513165.2	-1.89125	0.458451
1637	ENSG00000140265	ZSCAN29	1.41868	0.458267
1638	ENSG00000168827	GFM1	0.261679	0.458247
1639	ENSG00000115548	KDM3A	0.952728	0.457172
1640	ENSG00000198060	MARCHF5	1.48143	0.456632
1641	ENSG00000120733	KDM3B	3.13513	0.456508
1642	ENSG00000119977	TCTN3	1.14836	0.456289
1643	ENSG00000162910	MRPL55	0.860344	0.455883
1644	ENSG00000065485	PDIA5	-0.156505	0.455639
1645	ENSG00000150093	ITGB1	1.00018	0.455331
1646	ENSG00000096968	JAK2	0.843868	0.455327
1647	ENSG00000129566	TEP1	2.13061	0.455193
1648	ENSG00000185122	HSF1	1.90777	0.455153
1649	ENSG00000111875	ASF1A	2.05807	0.45464
1650	ENSG00000144036	EXOC6B	2.54149	0.454487
1651	ENSG00000268643	AC006486.1	-0.222026	0.454473
1652	ENSG00000049167	ERCC8	0.874084	0.453852
1653	ENSG00000140948	ZCCHC14	0.336745	0.453532
1654	ENSG00000196565	HBG2	1.07773	0.453475
1655	ENSG00000185608	MRPL40	-0.510447	0.453341
1656	ENSG00000131236	CAP1	3.17021	0.452463
1657	ENSG00000198839	ZNF277	-0.430499	0.452187
1658	ENSG00000170627	GTSF1	1.33798	0.451682
1659	ENSG00000172667	ZMAT3	-0.242114	0.451165
1660	ENSG00000106460	TMEM106B	0.628268	0.450703
1661	ENSG00000115183	TANC1	1.75208	0.450559
1662	ENSG00000187736	NHEJ1	0.571801	0.450054
1663	ENSG00000121073	SLC35B1	1.50039	0.44893
1664	ENSG00000170892	TSEN34	-0.0957469	0.448572
1665	ENSG00000107521	HPS1	0.966028	0.44845
1666	ENSG00000115827	DCAF17	2.04568	0.447821
1667	ENSG00000145817	YIPF5	1.78742	0.447721
1668	ENSG00000103342	GSPT1	0.574023	0.447318
1669	ENSG00000173889	PHC3	-1.10818	0.44608
1670	ENSG00000028116	VRK2	0.159153	0.445137
1671	ENSG00000108582	CPD	1.14615	0.444313
1672	ENSG00000156170	NDUFAF6	-0.140513	0.444243
1673	ENSG00000101224	CDC25B	2.36115	0.444228
1674	ENSG00000031003	FAM13B	1.21854	0.443859
1675	ENSG00000158604	TMED4	-0.201283	0.443618
1676	ENSG00000070413	DGCR2	2.33538	0.443201
1677	ENSG00000109790	KLHL5	-1.69434	0.442978
1678	ENSG00000123975	CKS2	2.19258	0.442437
1679	ENSG00000180098	TRNAU1AP	1.04393	0.442413
1680	ENSG00000181638	ZFP41	2.91088	0.442096
1681	ENSG00000165806	CASP7	1.799	0.441898
1682	ENSG00000189043	NDUFA4	0.529984	0.441442
1683	ENSG00000111196	MAGOHB	0.850132	0.441224
1684	ENSG00000122678	POLM	0.548455	0.441133
1685	ENSG00000164062	APEH	0.545746	0.440812
1686	ENSG00000213463	SYNJ2BP	1.63623	0.440654
1687	ENSG00000101391	CDK5RAP1	1.87364	0.440406
1688	ENSG00000149743	TRPT1	1.39545	0.439681
1689	ENSG00000272772	AC104109.3	-0.290954	0.439625
1690	ENSG00000137574	TGS1	0.166129	0.439515
1691	ENSG00000253368	TRNP1	0.957049	0.439505
1692	ENSG00000105053	VRK3	2.08671	0.438822
1693	ENSG00000100578	KIAA0586	1.49408	0.438613
1694	ENSG00000120333	MRPS14	1.03816	0.438593
1695	ENSG00000100897	DCAF11	1.19681	0.438552
1696	ENSG00000067369	TP53BP1	0.679356	0.438133
1697	ENSG00000128563	PRKRIP1	2.27817	0.438011
1698	ENSG00000041802	LSG1	0.926879	0.437799
1699	ENSG00000146530	VWDE	0.991971	0.437518
1700	ENSG00000285897	AC004687.2	1.95444	0.437318
1701	ENSG00000125885	MCM8	-0.20344	0.436853
1702	ENSG00000151657	KIN	0.755959	0.436352
1703	ENSG00000159399	HK2	2.47101	0.436168
1704	ENSG00000275700	AATF	2.86213	0.436118
1705	ENSG00000076201	PTPN23	3.06394	0.436059
1706	ENSG00000141002	TCF25	0.976979	0.435789
1707	ENSG00000125149	C16orf70	0.634766	0.434511
1708	ENSG00000115904	SOS1	1.34894	0.434498
1709	ENSG00000160087	UBE2J2	3.76409	0.434101
1710	ENSG00000010072	SPRTN	0.689998	0.434019
1711	ENSG00000204619	PPP1R11	1.43236	0.433769
1712	ENSG00000148835	TAF5	1.70091	0.433746
1713	ENSG00000258366	RTEL1	0.615288	0.431957
1714	ENSG00000151806	GUF1	0.978928	0.431479
1715	ENSG00000172500	FIBP	0.585383	0.431182
1716	ENSG00000205060	SLC35B4	1.46698	0.431161
1717	ENSG00000133119	RFC3	0.383433	0.430184
1718	ENSG00000106771	TMEM245	2.42781	0.430074
1719	ENSG00000131871	SELENOS	0.488713	0.429527
1720	ENSG00000047346	FAM214A	2.18428	0.429509
1721	ENSG00000100227	POLDIP3	2.17839	0.429485
1722	ENSG00000149115	TNKS1BP1	2.18955	0.42932
1723	ENSG00000126581	BECN1	2.233	0.428738
1724	ENSG00000261150	EPPK1	1.6174	0.428349
1725	ENSG00000075413	MARK3	2.15101	0.428335
1726	ENSG00000165271	NOL6	1.37722	0.427652
1727	ENSG00000074201	CLNS1A	-0.201456	0.4276
1728	ENSG00000255641	AC068775.1	0.300054	0.427533
1729	ENSG00000205810	KLRC3	0.300054	0.427533
1730	ENSG00000118873	RAB3GAP2	1.71227	0.427429
1731	ENSG00000136875	PRPF4	0.877388	0.425636
1732	ENSG00000158195	WASF2	2.47019	0.425415
1733	ENSG00000135387	CAPRIN1	0.187617	0.425015
1734	ENSG00000037897	METTL1	0.241045	0.424628
1735	ENSG00000213281	NRAS	3.19506	0.424572
1736	ENSG00000089737	DDX24	0.329998	0.424519
1737	ENSG00000132793	LPIN3	-0.588145	0.424188
1738	ENSG00000151247	EIF4E	0.0821434	0.423993
1739	ENSG00000089123	TASP1	0.397157	0.423976
1740	ENSG00000109534	GAR1	2.0253	0.423899
1741	ENSG00000136111	TBC1D4	0.462553	0.42336
1742	ENSG00000198026	ZNF335	9.53012	0.423083
1743	ENSG00000102390	PBDC1	0.147773	0.422671
1744	ENSG00000136877	FPGS	-1.69039	0.422648
1745	ENSG00000090621	PABPC4	2.58427	0.421654
1746	ENSG00000105568	PPP2R1A	0.785843	0.42119
1747	ENSG00000198727	MT-CYB	-0.552751	0.420712
1748	ENSG00000109472	CPE	3.56275	0.420608
1749	ENSG00000136451	VEZF1	1.93097	0.420594
1750	ENSG00000100991	TRPC4AP	3.42066	0.420584
1751	ENSG00000110492	MDK	-1.23426	0.420455
1752	ENSG00000103160	HSDL1	0.740964	0.419589
1753	ENSG00000214655	ZSWIM8	3.37092	0.419431
1754	ENSG00000145241	CENPC	0.750868	0.419322
1755	ENSG00000112200	ZNF451	2.76673	0.419036
1756	ENSG00000137563	GGH	1.88529	0.419002
1757	ENSG00000116871	MAP7D1	1.84293	0.418871
1758	ENSG00000269547	AC011455.2	1.19304	0.418612
1759	ENSG00000086589	RBM22	3.71778	0.418437
1760	ENSG00000148606	POLR3A	-1.47073	0.418387
1761	ENSG00000196151	WDSUB1	2.38181	0.418359
1762	ENSG00000113810	SMC4	2.08539	0.41826
1763	ENSG00000198912	C1orf174	2.4642	0.417882
1764	ENSG00000114739	ACVR2B	2.19299	0.417611
1765	ENSG00000141934	PLPP2	3.29181	0.417274
1766	ENSG00000159917	ZNF235	0.379907	0.417056
1767	ENSG00000132182	NUP210	3.20231	0.416507
1768	ENSG00000267680	ZNF224	1.85231	0.41648
1769	ENSG00000118007	STAG1	1.75625	0.416433
1770	ENSG00000113719	ERGIC1	0.669245	0.416213
1771	ENSG00000140299	BNIP2	2.53854	0.416119
1772	ENSG00000134107	BHLHE40	1.09941	0.415666
1773	ENSG00000104331	IMPAD1	1.8171	0.415445
1774	ENSG00000087152	ATXN7L3	1.69423	0.415333
1775	ENSG00000175455	CCDC14	2.41068	0.415039
1776	ENSG00000277157	H4C4	-0.833056	0.414778
1777	ENSG00000106080	FKBP14	1.08148	0.414714
1778	ENSG00000079999	KEAP1	2.70378	0.414693
1779	ENSG00000177556	ATOX1	0.139352	0.41465
1780	ENSG00000132478	UNK	1.74896	0.414188
1781	ENSG00000070087	PFN2	1.39016	0.41341
1782	ENSG00000135297	MTO1	-0.872398	0.413311
1783	ENSG00000006282	SPATA20	2.07316	0.413189
1784	ENSG00000088826	SMOX	1.59135	0.41315
1785	ENSG00000101084	RAB5IF	2.36016	0.412717
1786	ENSG00000077254	USP33	1.75124	0.41268
1787	ENSG00000120656	TAF12	-0.894347	0.412586
1788	ENSG00000166343	MSS51	0.556792	0.41255
1789	ENSG00000120053	GOT1	1.63647	0.412367
1790	ENSG00000118922	KLF12	2.49439	0.412088
1791	ENSG00000140950	MEAK7	1.08333	0.411897
1792	ENSG00000065457	ADAT1	0.943121	0.411777
1793	ENSG00000149554	CHEK1	1.29904	0.411757
1794	ENSG00000164338	UTP15	1.10449	0.411532
1795	ENSG00000181381	DDX60L	0.178306	0.411174
1796	ENSG00000143373	ZNF687	1.14816	0.411069
1797	ENSG00000198805	PNP	2.28539	0.410886
1798	ENSG00000276043	UHRF1	1.78049	0.41054
1799	ENSG00000101901	ALG13	2.02167	0.410244
1800	ENSG00000184445	KNTC1	0.568812	0.409884
1801	ENSG00000257365	FNTB	2.59592	0.409216
1802	ENSG00000182180	MRPS16	0.526176	0.408471
1803	ENSG00000073331	ALPK1	0.197967	0.408246
1804	ENSG00000139734	DIAPH3	2.6764	0.408048
1805	ENSG00000071859	FAM50A	4.18876	0.407718
1806	ENSG00000101220	C20orf27	0.150572	0.407577
1807	ENSG00000159352	PSMD4	2.65848	0.407306
1808	ENSG00000084112	SSH1	1.55802	0.407239
1809	ENSG00000180921	FAM83H	3.53788	0.406191
1810	ENSG00000196262	PPIA	0.544665	0.405788
1811	ENSG00000072110	ACTN1	1.30379	0.405291
1812	ENSG00000166145	SPINT1	0.919007	0.40505
1813	ENSG00000072571	HMMR	3.52916	0.404325
1814	ENSG00000164967	RPP25L	0.834355	0.404182
1815	ENSG00000184436	THAP7	0.497786	0.404006
1816	ENSG00000153339	TRAPPC8	0.156732	0.403959
1817	ENSG00000161048	NAPEPLD	2.83888	0.403036
1818	ENSG00000140157	NIPA2	0.873008	0.402843
1819	ENSG00000173207	CKS1B	1.78694	0.402761
1820	ENSG00000181061	HIGD1A	0.625172	0.402158
1821	ENSG00000065518	NDUFB4	1.62134	0.401785
1822	ENSG00000092203	TOX4	1.06789	0.401075
1823	ENSG00000110756	HPS5	1.1479	0.400892
1824	ENSG00000120688	WBP4	1.49229	0.400802
1825	ENSG00000240972	MIF	1.1154	0.400772
1826	ENSG00000165983	PTER	0.726013	0.400351
1827	ENSG00000117614	SYF2	2.41996	0.40014
1828	ENSG00000159873	CCDC117	1.59143	0.40009
1829	ENSG00000102780	DGKH	0.730503	0.400078
1830	ENSG00000156011	PSD3	2.36071	0.400051
1831	ENSG00000130749	ZC3H4	3.28539	0.399305
1832	ENSG00000132768	DPH2	3.14277	0.39928
1833	ENSG00000115307	AUP1	4.1502	0.399175
1834	ENSG00000079332	SAR1A	0.315928	0.39878
1835	ENSG00000167378	IRGQ	1.40837	0.398663
1836	ENSG00000108239	TBC1D12	1.00548	0.398615
1837	ENSG00000269711	AC008763.3	-1.70157	0.398595
1838	ENSG00000107758	PPP3CB	0.813013	0.398518
1839	ENSG00000123104	ITPR2	2.01234	0.398516
1840	ENSG00000164597	COG5	0.407424	0.398404
1841	ENSG00000250021	ARPIN-AP3S2	1.10007	0.398361
1842	ENSG00000094916	CBX5	4.46247	0.3981
1843	ENSG00000161513	FDXR	0.0491536	0.397961
1844	ENSG00000159202	UBE2Z	1.47313	0.397734
1845	ENSG00000007392	LUC7L	0.523206	0.397428
1846	ENSG00000144566	RAB5A	2.11637	0.397372
1847	ENSG00000143549	TPM3	0.81855	0.397279
1848	ENSG00000120254	MTHFD1L	2.95136	0.396919
1849	ENSG00000185896	LAMP1	1.77715	0.396895
1850	ENSG00000135148	TRAFD1	1.97652	0.396389
1851	ENSG00000115942	ORC2	1.14124	0.396384
1852	ENSG00000131171	SH3BGRL	0.119419	0.396104
1853	ENSG00000160447	PKN3	1.1855	0.395967
1854	ENSG00000003756	RBM5	2.73933	0.395582
1855	ENSG00000111711	GOLT1B	1.49277	0.395572
1856	ENSG00000137575	SDCBP	0.842002	0.3949
1857	ENSG00000065029	ZNF76	2.7555	0.394775
1858	ENSG00000251357	AP000350.4	1.15004	0.394728
1859	ENSG00000006125	AP2B1	1.92159	0.394509
1860	ENSG00000051341	POLQ	1.81091	0.394248
1861	ENSG00000198553	KCNRG	0.648339	0.39405
1862	ENSG00000130413	STK33	2.39469	0.393755
1863	ENSG00000154781	CCDC174	1.53453	0.39368
1864	ENSG00000184860	SDR42E1	2.92293	0.39366
1865	ENSG00000005884	ITGA3	2.5978	0.393286
1866	ENSG00000076248	UNG	3.83481	0.393181
1867	ENSG00000113851	CRBN	0.358613	0.392793
1868	ENSG00000121671	CRY2	1.82891	0.392632
1869	ENSG00000134333	LDHA	0.773093	0.392327
1870	ENSG00000124587	PEX6	0.970097	0.392175
1871	ENSG00000152234	ATP5F1A	0.444057	0.391799
1872	ENSG00000084676	NCOA1	0.416295	0.391643
1873	ENSG00000107819	SFXN3	1.51354	0.39133
1874	ENSG00000164144	ARFIP1	1.35721	0.39105
1875	ENSG00000154429	CCSAP	3.10797	0.39102
1876	ENSG00000156831	NSMCE2	1.96862	0.39041
1877	ENSG00000130313	PGLS	3.73479	0.390261
1878	ENSG00000119638	NEK9	-0.0211363	0.390041
1879	ENSG00000100266	PACSIN2	-0.436691	0.389738
1880	ENSG00000106588	PSMA2	1.42148	0.389605
1881	ENSG00000181019	NQO1	0.835433	0.389538
1882	ENSG00000100612	DHRS7	0.271342	0.389456
1883	ENSG00000100523	DDHD1	0.561896	0.389182
1884	ENSG00000083307	GRHL2	1.47323	0.389036
1885	ENSG00000212124	TAS2R19	1.01083	0.388526
1886	ENSG00000198945	L3MBTL3	2.19874	0.388328
1887	ENSG00000171763	SPATA5L1	1.86072	0.388188
1888	ENSG00000073921	PICALM	0.49019	0.388092
1889	ENSG00000087302	RTRAF	0.108569	0.387923
1890	ENSG00000114529	C3orf52	-0.274112	0.387662
1891	ENSG00000089902	RCOR1	1.64245	0.387112
1892	ENSG00000173517	PEAK1	-0.105795	0.387104
1893	ENSG00000134884	ARGLU1	0.39425	0.386806
1894	ENSG00000001497	LAS1L	1.56264	0.386458
1895	ENSG00000066136	NFYC	1.47905	0.386117
1896	ENSG00000143815	LBR	2.35871	0.386041
1897	ENSG00000104756	KCTD9	0.631391	0.385495
1898	ENSG00000102316	MAGED2	3.01392	0.384796
1899	ENSG00000100344	PNPLA3	-0.324072	0.384359
1900	ENSG00000123552	USP45	2.31973	0.384172
1901	ENSG00000136463	TACO1	1.67998	0.384161
1902	ENSG00000144120	TMEM177	0.453921	0.383383
1903	ENSG00000129933	MAU2	1.32029	0.383328
1904	ENSG00000185716	MOSMO	1.96003	0.382881
1905	ENSG00000149182	ARFGAP2	1.57512	0.382841
1906	ENSG00000213593	TMX2	1.65427	0.382677
1907	ENSG00000214160	ALG3	1.35347	0.381743
1908	ENSG00000108819	PPP1R9B	1.92765	0.381505
1909	ENSG00000198793	MTOR	1.68832	0.381501
1910	ENSG00000167700	MFSD3	0.275169	0.381413
1911	ENSG00000123992	DNPEP	0.682666	0.381227
1912	ENSG00000243789	JMJD7	0.365281	0.381219
1913	ENSG00000146457	WTAP	1.13995	0.381039
1914	ENSG00000154305	MIA3	1.41074	0.38066
1915	ENSG00000100151	PICK1	2.95981	0.380658
1916	ENSG00000095319	NUP188	3.31254	0.379723
1917	ENSG00000164031	DNAJB14	3.24674	0.379709
1918	ENSG00000149547	EI24	1.10298	0.379053
1919	ENSG00000159314	ARHGAP27	2.2395	0.378976
1920	ENSG00000154240	CEP112	0.765932	0.37877
1921	ENSG00000176444	CLK2	2.89971	0.378759
1922	ENSG00000119401	TRIM32	0.146347	0.378625
1923	ENSG00000172315	TP53RK	1.37019	0.377873
1924	ENSG00000107816	LZTS2	1.72378	0.377825
1925	ENSG00000171903	CYP4F11	0.694598	0.377537
1926	ENSG00000102226	USP11	1.8713	0.377173
1927	ENSG00000114491	UMPS	-0.928989	0.377058
1928	ENSG00000137269	LRRC1	1.77982	0.376884
1929	ENSG00000115524	SF3B1	-0.114087	0.376514
1930	ENSG00000102931	ARL2BP	0.776867	0.376397
1931	ENSG00000160679	CHTOP	0.982171	0.376376
1932	ENSG00000089820	ARHGAP4	1.34377	0.375577
1933	ENSG00000165688	PMPCA	0.977655	0.375459
[truncated: 5,349 more rows]
