# Supplementary material for: ZC3H4 restricts non-coding transcription in human cells
Source: eLife. 2021 Apr 29;10:e67305. doi: 10.7554/eLife.67305 (PMC8137146; doi:10.7554/eLife.67305)
Supplement: Supplementary file 4. [file elife-67305-supp4.xlsx]

## Sheet: INTS1_mRNA_up_noRT
gene.log2FC	gene.name	gene.biotype	gene.expression
ENSG00000140481	5.41632	CCDC33	protein_coding	20.9732
ENSG00000115461	5.38119	IGFBP5	protein_coding	10.1539
ENSG00000159337	4.46055	PLA2G4D	protein_coding	11.081
ENSG00000099840	3.70784	IZUMO4	protein_coding	13.5564
ENSG00000171227	3.51753	TMEM37	protein_coding	26.5469
ENSG00000101846	2.98052	STS	protein_coding	12.3131
ENSG00000135414	2.94996	GDF11	protein_coding	217.793
ENSG00000139767	2.86549	SRRM4	protein_coding	15.4775
ENSG00000153930	2.83339	ANKFN1	protein_coding	13.3268
ENSG00000198753	2.81796	PLXNB3	protein_coding	15.3046
ENSG00000119630	2.77952	PGF	protein_coding	40.0425
ENSG00000064300	2.72422	NGFR	protein_coding	36.7905
ENSG00000172508	2.66599	CARNS1	protein_coding	16.3596
ENSG00000074410	2.58535	CA12	protein_coding	18.4808
ENSG00000167653	2.547	PSCA	protein_coding	20.3609
ENSG00000128253	2.38114	RFPL2	protein_coding	14.123
ENSG00000166278	2.29252	C2	protein_coding	57.7133
ENSG00000183696	2.28688	UPP1	protein_coding	161.047
ENSG00000116741	2.27235	RGS2	protein_coding	36.6622
ENSG00000087116	2.25537	ADAMTS2	protein_coding	22.1939
ENSG00000243710	2.21117	CFAP57	protein_coding	50.4299
ENSG00000069812	2.17404	HES2	protein_coding	139.166
ENSG00000242265	2.12548	PEG10	protein_coding	41.5261
ENSG00000205592	2.0885	MUC19	protein_coding	349.574
ENSG00000076641	2.01843	PAG1	protein_coding	103.05
ENSG00000174775	1.89413	HRAS	protein_coding	41.7834
ENSG00000114812	1.87434	VIPR1	protein_coding	282.211
ENSG00000185507	1.85375	IRF7	protein_coding	44.4989
ENSG00000204624	1.7979	DISP3	protein_coding	71.9882
ENSG00000162804	1.73971	SNED1	protein_coding	205.774
ENSG00000228696	1.69235	ARL17B	protein_coding	23.8611
ENSG00000114737	1.67528	CISH	protein_coding	32.4845
ENSG00000162390	1.67051	ACOT11	protein_coding	844.993
ENSG00000182253	1.6306	SYNM	protein_coding	475.971
ENSG00000185338	1.61948	SOCS1	protein_coding	29.0776
ENSG00000069424	1.6153	KCNAB2	protein_coding	224.655
ENSG00000110057	1.59477	UNC93B1	protein_coding	58.7196
ENSG00000170043	1.58942	TRAPPC1	protein_coding	55.8345
ENSG00000020633	1.56681	RUNX3	protein_coding	86.1735
ENSG00000130707	1.5665	ASS1	protein_coding	86.5403
ENSG00000166762	1.55885	CATSPER2	protein_coding	463.591
ENSG00000112139	1.54494	MDGA1	protein_coding	51.2759
ENSG00000185010	1.53359	F8	protein_coding	25.583
ENSG00000149600	1.51463	COMMD7	protein_coding	46.1924
ENSG00000170500	1.51056	LONRF2	protein_coding	307.161
ENSG00000160326	1.51038	SLC2A6	protein_coding	109.42
ENSG00000095637	1.4849	SORBS1	protein_coding	110.141
ENSG00000249240	1.48406	AC069368.1	protein_coding	36.9629
ENSG00000141837	1.47671	CACNA1A	protein_coding	307.44
ENSG00000090565	1.42181	RAB11FIP3	protein_coding	79.4435
ENSG00000138172	1.41914	CALHM2	protein_coding	98.7623
ENSG00000198805	1.39293	PNP	protein_coding	175.615
ENSG00000165731	1.39145	RET	protein_coding	85.2402
ENSG00000171798	1.36958	KNDC1	protein_coding	38.2726
ENSG00000174292	1.36738	TNK1	protein_coding	143.805
ENSG00000136002	1.35731	ARHGEF4	protein_coding	373.116
ENSG00000196517	1.35108	SLC6A9	protein_coding	51.7261
ENSG00000177106	1.33936	EPS8L2	protein_coding	315.649
ENSG00000241839	1.33688	PLEKHO2	protein_coding	134.11
ENSG00000115129	1.33561	TP53I3	protein_coding	73.176
ENSG00000197467	1.32821	COL13A1	protein_coding	94.0949
ENSG00000141524	1.32461	TMC6	protein_coding	579.3
ENSG00000076706	1.31706	MCAM	protein_coding	51.9059
ENSG00000196118	1.29613	CCDC189	protein_coding	55.0608
ENSG00000172819	1.29218	RARG	protein_coding	126.612
ENSG00000019485	1.27507	PRDM11	protein_coding	54.0525
ENSG00000142408	1.26768	CACNG8	protein_coding	42.4768
ENSG00000183337	1.26306	BCOR	protein_coding	998.522
ENSG00000188542	1.2612	DUSP28	protein_coding	66.0972
ENSG00000108821	1.2495	COL1A1	protein_coding	177.415
ENSG00000100299	1.24054	ARSA	protein_coding	150.04
ENSG00000140807	1.23271	NKD1	protein_coding	267.159
ENSG00000144134	1.23244	RABL2A	protein_coding	136.404
ENSG00000106976	1.22809	DNM1	protein_coding	209.027
ENSG00000079215	1.22155	SLC1A3	protein_coding	381.194
ENSG00000123453	1.21507	SARDH	protein_coding	64.7197
ENSG00000158457	1.19783	TSPAN33	protein_coding	84.6971
ENSG00000149260	1.19761	CAPN5	protein_coding	109.294
ENSG00000137857	1.19585	DUOX1	protein_coding	315.931
ENSG00000152582	1.19535	SPEF2	protein_coding	127.727
ENSG00000164626	1.18151	KCNK5	protein_coding	75.1789
ENSG00000133065	1.1749	SLC41A1	protein_coding	319.174
ENSG00000158106	1.16945	RHPN1	protein_coding	200.068
ENSG00000135111	1.16711	TBX3	protein_coding	57.5761
ENSG00000186350	1.16236	RXRA	protein_coding	151.298
ENSG00000099860	1.14409	GADD45B	protein_coding	116.641
ENSG00000104518	1.13825	GSDMD	protein_coding	135.734
ENSG00000167716	1.13406	WDR81	protein_coding	215.216
ENSG00000136720	1.12479	HS6ST1	protein_coding	60.8256
ENSG00000173559	1.12257	NABP1	protein_coding	2600.11
ENSG00000133687	1.10835	TMTC1	protein_coding	49.914
ENSG00000102312	1.10666	PORCN	protein_coding	58.9668
ENSG00000175344	1.09286	CHRNA7	protein_coding	102.893
ENSG00000164638	1.08124	SLC29A4	protein_coding	63.287
ENSG00000134775	1.07864	FHOD3	protein_coding	80.2322
ENSG00000137266	1.06211	SLC22A23	protein_coding	238.751
ENSG00000131848	1.05111	ZSCAN5A	protein_coding	171.907
ENSG00000198208	1.04532	RPS6KL1	protein_coding	52.5568
ENSG00000131711	1.0443	MAP1B	protein_coding	468.361
ENSG00000261408	1.03088	TEN1-CDK3	protein_coding	64.2392
ENSG00000285505	1.01219	AC010616.1	protein_coding	82.9647
ENSG00000133216	1.00813	EPHB2	protein_coding	306.239
ENSG00000007402	1.0006	CACNA2D2	protein_coding	77.9857
ENSG00000204099	6.92574	NEU4	protein_coding	10.8061
ENSG00000173421	5.48979	CCDC36	protein_coding	22.0491
ENSG00000128918	5.01879	ALDH1A2	protein_coding	302.691
ENSG00000168907	4.9149	PLA2G4F	protein_coding	7.40277
ENSG00000091986	4.62359	CCDC80	protein_coding	62.0447
ENSG00000130649	4.59664	CYP2E1	protein_coding	30.076
ENSG00000174792	4.4642	ODAPH	protein_coding	16.0675
ENSG00000108556	4.07466	CHRNE	protein_coding	37.7634
ENSG00000095110	3.81559	NXPE1	protein_coding	14.5191
ENSG00000187634	3.79552	SAMD11	protein_coding	21.1831
ENSG00000183379	3.61535	SYNDIG1L	protein_coding	22.864
ENSG00000170442	3.52163	AC021066.1	protein_coding	8.86527
ENSG00000185112	3.3958	FAM43A	protein_coding	21.933
ENSG00000010319	3.32342	SEMA3G	protein_coding	63.1503
ENSG00000170324	3.29542	FRMPD2	protein_coding	10.1398
ENSG00000143333	3.23524	RGS16	protein_coding	32.2105
ENSG00000008226	3.23413	DLEC1	protein_coding	14.7796
ENSG00000221963	3.21133	APOL6	protein_coding	21.8439
ENSG00000203727	3.14275	SAMD5	protein_coding	634.874
ENSG00000165507	3.12421	DEPP1	protein_coding	87.967
ENSG00000115844	3.1053	DLX2	protein_coding	16.0937
ENSG00000204882	3.03996	GPR20	protein_coding	19.9077
ENSG00000167964	3.03792	RAB26	protein_coding	40.0296
ENSG00000090554	3.00645	FLT3LG	protein_coding	37.2167
ENSG00000163449	2.90449	TMEM169	protein_coding	8.46817
ENSG00000179859	2.84703	RNF227	protein_coding	32.9834
ENSG00000284713	2.84081	SMIM38	protein_coding	35.5153
ENSG00000128917	2.79974	DLL4	protein_coding	30.2585
ENSG00000119681	2.74162	LTBP2	protein_coding	163.654
ENSG00000129757	2.73579	CDKN1C	protein_coding	16.2788
ENSG00000100626	2.69061	GALNT16	protein_coding	36.6677
ENSG00000181143	2.68703	MUC16	protein_coding	240.013
ENSG00000104140	2.67526	RHOV	protein_coding	30.2107
ENSG00000261341	2.67322	AC010325.1	protein_coding	10.4525
ENSG00000111678	2.66433	C12orf57	protein_coding	233.633
ENSG00000157734	2.65659	SNX22	protein_coding	101.746
ENSG00000167711	2.65259	SERPINF2	protein_coding	21.1334
ENSG00000242852	2.62334	ZNF709	protein_coding	30.9362
ENSG00000103723	2.62279	AP3B2	protein_coding	34.876
ENSG00000266074	2.59728	BAHCC1	protein_coding	630.496
ENSG00000245848	2.58922	CEBPA	protein_coding	18.5311
ENSG00000261150	2.56832	EPPK1	protein_coding	948.505
ENSG00000135480	2.56166	KRT7	protein_coding	42.6607
ENSG00000168490	2.55711	PHYHIP	protein_coding	11.0238
ENSG00000120262	2.55083	CCDC170	protein_coding	21.9239
ENSG00000070886	2.53678	EPHA8	protein_coding	49.1047
ENSG00000244242	2.49781	IFITM10	protein_coding	17.3291
ENSG00000186510	2.49663	CLCNKA	protein_coding	16.0689
ENSG00000158683	2.46225	PKD1L1	protein_coding	83.3176
ENSG00000148735	2.43495	PLEKHS1	protein_coding	26.2342
ENSG00000196632	2.4305	WNK3	protein_coding	19.9558
ENSG00000004139	2.42307	SARM1	protein_coding	193.719
ENSG00000146700	2.42122	SSC4D	protein_coding	10.6404
ENSG00000029534	2.40083	ANK1	protein_coding	71.5406
ENSG00000173805	2.37699	HAP1	protein_coding	201.543
ENSG00000157782	2.37575	CABP1	protein_coding	13.1266
ENSG00000103034	2.37554	NDRG4	protein_coding	196.312
ENSG00000181626	2.37209	ANKRD62	protein_coding	55.5972
ENSG00000165272	2.36903	AQP3	protein_coding	13.5438
ENSG00000133401	2.36544	PDZD2	protein_coding	35.8757
ENSG00000118194	2.36145	TNNT2	protein_coding	64.7931
ENSG00000143382	2.36139	ADAMTSL4	protein_coding	15.0829
ENSG00000167703	2.33688	SLC43A2	protein_coding	173.419
ENSG00000177045	2.33099	SIX5	protein_coding	26.9033
ENSG00000101638	2.32831	ST8SIA5	protein_coding	41.6466
ENSG00000108797	2.32699	CNTNAP1	protein_coding	55.2562
ENSG00000161509	2.3144	GRIN2C	protein_coding	260.6
ENSG00000214456	2.3048	PLIN5	protein_coding	157.69
ENSG00000163803	2.29518	PLB1	protein_coding	15.3772
ENSG00000198576	2.2766	ARC	protein_coding	47.6253
ENSG00000243649	2.27611	CFB	protein_coding	28.8646
ENSG00000076770	2.2423	MBNL3	protein_coding	19.1793
ENSG00000259803	2.23747	SLC22A31	protein_coding	125.96
ENSG00000181418	2.21834	DDN	protein_coding	22.4759
ENSG00000105329	2.21162	TGFB1	protein_coding	43.1867
ENSG00000197380	2.20988	DACT3	protein_coding	21.5682
ENSG00000181585	2.20773	TMIE	protein_coding	16.3312
ENSG00000197774	2.16993	EME2	protein_coding	644.969
ENSG00000143603	2.16311	KCNN3	protein_coding	80.335
ENSG00000103253	2.15892	HAGHL	protein_coding	75.1872
ENSG00000179348	2.15352	GATA2	protein_coding	71.7932
ENSG00000178217	2.14795	SH2D4B	protein_coding	32.3182
ENSG00000132688	2.14727	NES	protein_coding	229.198
ENSG00000240720	2.14101	LRRD1	protein_coding	18.3442
ENSG00000175697	2.13613	GPR156	protein_coding	17.839
ENSG00000149403	2.11871	GRIK4	protein_coding	47.4749
ENSG00000167549	2.10864	CORO6	protein_coding	111.371
ENSG00000183508	2.09675	TENT5C	protein_coding	89.2653
ENSG00000187244	2.09442	BCAM	protein_coding	681.916
ENSG00000241935	2.09164	HOGA1	protein_coding	38.7047
ENSG00000244255	2.08884	AL645922.1	protein_coding	33.7932
ENSG00000068078	2.08402	FGFR3	protein_coding	135.874
ENSG00000188191	2.07974	PRKAR1B	protein_coding	28.0747
ENSG00000162004	2.07202	CCDC78	protein_coding	70.8913
ENSG00000184557	2.0718	SOCS3	protein_coding	54.1695
ENSG00000100290	2.06078	BIK	protein_coding	17.1013
ENSG00000269313	2.06	MAGIX	protein_coding	34.1774
ENSG00000106003	2.02648	LFNG	protein_coding	64.642
ENSG00000187944	2.0167	C2orf66	protein_coding	27.5918
ENSG00000110799	2.01219	VWF	protein_coding	45.2036
ENSG00000187775	2.00922	DNAH17	protein_coding	219.831
ENSG00000168890	2.00775	TMEM150A	protein_coding	72.5579
ENSG00000187583	1.99736	PLEKHN1	protein_coding	45.1199
ENSG00000103184	1.9746	SEC14L5	protein_coding	48.6767
ENSG00000073670	1.96634	ADAM11	protein_coding	53.2155
ENSG00000133246	1.96547	PRAM1	protein_coding	23.1385
ENSG00000185818	1.96329	NAT8L	protein_coding	35.4229
ENSG00000126903	1.96132	SLC10A3	protein_coding	22.0149
ENSG00000169992	1.95902	NLGN2	protein_coding	333.12
ENSG00000159403	1.9579	C1R	protein_coding	44.9407
ENSG00000167772	1.95547	ANGPTL4	protein_coding	42.943
ENSG00000149809	1.95352	TM7SF2	protein_coding	182.156
ENSG00000157343	1.95041	ARMC12	protein_coding	20.5876
ENSG00000168209	1.94572	DDIT4	protein_coding	166.778
ENSG00000140279	1.93634	DUOX2	protein_coding	46.9672
ENSG00000152518	1.93617	ZFP36L2	protein_coding	78.4905
ENSG00000138798	1.93353	EGF	protein_coding	79.3878
ENSG00000285791	1.9301	AC009879.3	protein_coding	18.8458
ENSG00000167702	1.92549	KIFC2	protein_coding	268.203
ENSG00000250803	1.92481	AC010255.3	protein_coding	22.1963
ENSG00000135362	1.9229	PRR5L	protein_coding	22.3475
ENSG00000008382	1.9146	MPND	protein_coding	48.996
ENSG00000162591	1.90635	MEGF6	protein_coding	326.193
ENSG00000105516	1.8969	DBP	protein_coding	332.896
ENSG00000184584	1.89324	STING1	protein_coding	138.976
ENSG00000100379	1.8877	KCTD17	protein_coding	47.1203
ENSG00000198832	1.8789	SELENOM	protein_coding	68.4273
ENSG00000088899	1.87826	LZTS3	protein_coding	58.7187
ENSG00000007516	1.87275	BAIAP3	protein_coding	222.608
ENSG00000149591	1.8713	TAGLN	protein_coding	121.854
ENSG00000084710	1.86875	EFR3B	protein_coding	26.0348
ENSG00000171368	1.86197	TPPP	protein_coding	72.2913
ENSG00000130827	1.8564	PLXNA3	protein_coding	994.77
ENSG00000100100	1.85247	PIK3IP1	protein_coding	34.9395
ENSG00000167371	1.84939	PRRT2	protein_coding	25.3678
ENSG00000140488	1.84658	CELF6	protein_coding	88.8636
ENSG00000105258	1.83142	POLR2I	protein_coding	23.4856
ENSG00000178814	1.82977	OPLAH	protein_coding	198.879
ENSG00000108515	1.82955	ENO3	protein_coding	79.2346
ENSG00000109667	1.82644	SLC2A9	protein_coding	43.6462
ENSG00000131398	1.82178	KCNC3	protein_coding	81.9222
ENSG00000103260	1.821	METRN	protein_coding	89.1319
ENSG00000175318	1.81266	GRAMD2A	protein_coding	106.274
ENSG00000133250	1.80894	ZNF414	protein_coding	26.0322
ENSG00000184185	1.80855	KCNJ12	protein_coding	21.8193
ENSG00000150672	1.80845	DLG2	protein_coding	40.6038
ENSG00000099875	1.8021	MKNK2	protein_coding	362.745
ENSG00000144668	1.8017	ITGA9	protein_coding	29.8142
ENSG00000177666	1.79152	PNPLA2	protein_coding	208.286
ENSG00000140839	1.7887	CLEC18B	protein_coding	74.5991
ENSG00000130821	1.7807	SLC6A8	protein_coding	141.681
ENSG00000253368	1.77987	TRNP1	protein_coding	108.825
ENSG00000184205	1.77941	TSPYL2	protein_coding	527.974
ENSG00000272031	1.77129	ANKRD34A	protein_coding	33.8309
ENSG00000063438	1.77012	AHRR	protein_coding	126.608
ENSG00000025708	1.76093	TYMP	protein_coding	187.915
ENSG00000006534	1.75481	ALDH3B1	protein_coding	96.9733
ENSG00000197165	1.75405	SULT1A2	protein_coding	43.5399
ENSG00000089250	1.75342	NOS1	protein_coding	54.1051
ENSG00000173264	1.74627	GPR137	protein_coding	107.952
ENSG00000162241	1.74293	SLC25A45	protein_coding	150.837
ENSG00000185634	1.73617	SHC4	protein_coding	20.032
ENSG00000100429	1.72495	HDAC10	protein_coding	234.201
ENSG00000168961	1.72154	LGALS9	protein_coding	50.3442
ENSG00000182040	1.72067	USH1G	protein_coding	26.8939
ENSG00000108840	1.71636	HDAC5	protein_coding	234.403
ENSG00000179403	1.71072	VWA1	protein_coding	94.2701
ENSG00000221968	1.71011	FADS3	protein_coding	294.621
ENSG00000114378	1.70972	HYAL1	protein_coding	77.8645
ENSG00000155066	1.70804	PROM2	protein_coding	172.198
ENSG00000160179	1.7072	ABCG1	protein_coding	25.1866
ENSG00000167100	1.70713	SAMD14	protein_coding	68.3981
ENSG00000160606	1.70627	TLCD1	protein_coding	23.4787
ENSG00000169884	1.70376	WNT10B	protein_coding	23.809
ENSG00000228672	1.70351	PROB1	protein_coding	20.0618
ENSG00000168101	1.7019	NUDT16L1	protein_coding	24.1759
ENSG00000164920	1.70102	OSR2	protein_coding	25.4666
ENSG00000099338	1.69424	CATSPERG	protein_coding	195.667
ENSG00000196155	1.69417	AC040160.1	protein_coding	251.379
ENSG00000131584	1.6936	ACAP3	protein_coding	266.471
ENSG00000068831	1.69341	RASGRP2	protein_coding	43.0889
ENSG00000134245	1.69216	WNT2B	protein_coding	172.758
ENSG00000123933	1.69183	MXD4	protein_coding	340.863
ENSG00000068781	1.69172	STON1-GTF2A1L	protein_coding	84.7362
ENSG00000095303	1.68737	PTGS1	protein_coding	59.6475
ENSG00000216490	1.68706	IFI30	protein_coding	102.408
ENSG00000069399	1.68633	BCL3	protein_coding	39.4064
ENSG00000161040	1.68111	FBXL13	protein_coding	66.7623
ENSG00000206077	1.67599	ZDHHC11B	protein_coding	173.157
ENSG00000117407	1.67234	ARTN	protein_coding	41.3597
ENSG00000189171	1.67209	S100A13	protein_coding	275.249
ENSG00000261587	1.67167	TMEM249	protein_coding	29.5479
ENSG00000157445	1.66831	CACNA2D3	protein_coding	39.88
ENSG00000187796	1.66579	CARD9	protein_coding	26.915
ENSG00000286169	1.66287	AHRR	protein_coding	198.226
ENSG00000214193	1.66036	SH3D21	protein_coding	222.933
ENSG00000091879	1.65262	ANGPT2	protein_coding	105.672
ENSG00000008710	1.65142	PKD1	protein_coding	588.79
ENSG00000159640	1.64613	ACE	protein_coding	94.0282
ENSG00000182580	1.64612	EPHB3	protein_coding	67.3103
ENSG00000168056	1.64471	LTBP3	protein_coding	852.143
ENSG00000136490	1.64355	LIMD2	protein_coding	38.2266
ENSG00000116661	1.64	FBXO2	protein_coding	140.693
ENSG00000148344	1.63488	PTGES	protein_coding	45.7626
ENSG00000103254	1.63393	ANTKMT	protein_coding	24.9966
ENSG00000176406	1.63169	RIMS2	protein_coding	44.7885
ENSG00000099330	1.62837	OCEL1	protein_coding	51.907
ENSG00000267385	1.62602	AC011498.4	protein_coding	53.1363
ENSG00000107816	1.62523	LZTS2	protein_coding	727.968
ENSG00000187017	1.62343	ESPN	protein_coding	156.006
ENSG00000161328	1.62042	LRRC56	protein_coding	97.665
ENSG00000150967	1.62005	ABCB9	protein_coding	378.03
ENSG00000143434	1.61424	SEMA6C	protein_coding	120.907
ENSG00000221890	1.61113	NPTXR	protein_coding	67.8964
ENSG00000126243	1.60953	LRFN3	protein_coding	73.7357
ENSG00000185909	1.60888	KLHDC8B	protein_coding	57.6506
ENSG00000170049	1.60767	KCNAB3	protein_coding	272.289
ENSG00000141540	1.59895	TTYH2	protein_coding	157.792
ENSG00000131459	1.59355	GFPT2	protein_coding	185.005
ENSG00000012171	1.59337	SEMA3B	protein_coding	155.738
ENSG00000139187	1.58022	KLRG1	protein_coding	37.4185
ENSG00000136383	1.57791	ALPK3	protein_coding	246.674
ENSG00000125347	1.57788	IRF1	protein_coding	254.619
ENSG00000167077	1.57151	MEI1	protein_coding	32.0751
ENSG00000141232	1.56951	TOB1	protein_coding	206.088
ENSG00000164088	1.56776	PPM1M	protein_coding	68.6499
ENSG00000132535	1.56734	DLG4	protein_coding	121.452
ENSG00000168874	1.56161	ATOH8	protein_coding	68.4993
ENSG00000173137	1.5609	ADCK5	protein_coding	78.992
ENSG00000130475	1.55623	FCHO1	protein_coding	68.7444
ENSG00000172366	1.55471	MCRIP2	protein_coding	66.9974
ENSG00000062524	1.5521	LTK	protein_coding	51.0737
ENSG00000171680	1.55097	PLEKHG5	protein_coding	295.881
ENSG00000182326	1.54525	C1S	protein_coding	61.9706
ENSG00000175906	1.54177	ARL4D	protein_coding	29.7758
ENSG00000140009	1.53574	ESR2	protein_coding	39.6981
ENSG00000244694	1.53356	PTCHD4	protein_coding	96.5073
ENSG00000204386	1.53319	NEU1	protein_coding	185.568
ENSG00000174950	1.53165	CD164L2	protein_coding	35.6211
ENSG00000266094	1.53041	RASSF5	protein_coding	68.9452
ENSG00000117461	1.53027	PIK3R3	protein_coding	187.827
ENSG00000125409	1.52868	TEKT3	protein_coding	25.5075
ENSG00000117425	1.52204	PTCH2	protein_coding	108.314
ENSG00000148926	1.50625	ADM	protein_coding	150.359
ENSG00000163132	1.50503	MSX1	protein_coding	90.6413
ENSG00000260220	1.49354	CCDC187	protein_coding	84.0464
ENSG00000172638	1.48999	EFEMP2	protein_coding	36.5931
ENSG00000176058	1.48846	TPRN	protein_coding	49.9795
ENSG00000167700	1.4879	MFSD3	protein_coding	69.6384
ENSG00000163702	1.48778	IL17RC	protein_coding	57.498
ENSG00000167566	1.48771	NCKAP5L	protein_coding	308.328
ENSG00000107821	1.47929	KAZALD1	protein_coding	118.373
ENSG00000070444	1.47517	MNT	protein_coding	248.215
ENSG00000160932	1.47394	LY6E	protein_coding	76.1878
ENSG00000147804	1.47069	SLC39A4	protein_coding	91.3389
ENSG00000186364	1.47055	NUDT17	protein_coding	54.5252
ENSG00000142661	1.46395	MYOM3	protein_coding	134.951
ENSG00000278139	1.45741	AL358075.4	protein_coding	47.1752
ENSG00000110719	1.45645	TCIRG1	protein_coding	239.644
ENSG00000264813	1.45404	AC113554.1	protein_coding	33.5855
ENSG00000149527	1.44879	PLCH2	protein_coding	29.6051
ENSG00000099625	1.44803	CBARP	protein_coding	41.015
ENSG00000188130	1.44645	MAPK12	protein_coding	525.38
ENSG00000108511	1.44513	HOXB6	protein_coding	402.242
ENSG00000172771	1.44369	EFCAB12	protein_coding	61.3276
ENSG00000109107	1.43816	ALDOC	protein_coding	86.72
ENSG00000205593	1.43683	DENND6B	protein_coding	40.9329
ENSG00000114859	1.43444	CLCN2	protein_coding	526.645
ENSG00000105655	1.43191	ISYNA1	protein_coding	276.394
ENSG00000139190	1.43045	VAMP1	protein_coding	235.894
ENSG00000177238	1.43039	TRIM72	protein_coding	272.54
ENSG00000134574	1.42622	DDB2	protein_coding	625.671
ENSG00000179761	1.42146	PIPOX	protein_coding	48.0003
ENSG00000175567	1.42048	UCP2	protein_coding	56.9128
ENSG00000143320	1.41726	CRABP2	protein_coding	102.29
ENSG00000180448	1.41506	AC004151.1	protein_coding	130.462
ENSG00000111077	1.41363	TNS2	protein_coding	330.928
ENSG00000215788	1.40394	TNFRSF25	protein_coding	162.219
ENSG00000176945	1.40258	MUC20	protein_coding	235.4
ENSG00000168389	1.40206	MFSD2A	protein_coding	56.1227
ENSG00000181652	1.39852	ATG9B	protein_coding	35.3868
ENSG00000158286	1.39742	RNF207	protein_coding	863.078
ENSG00000107957	1.397	SH3PXD2A	protein_coding	253.662
ENSG00000139718	1.39559	SETD1B	protein_coding	204.668
ENSG00000224051	1.39349	CPTP	protein_coding	33.1046
ENSG00000183044	1.3893	ABAT	protein_coding	156.002
ENSG00000114841	1.38767	DNAH1	protein_coding	667.18
ENSG00000287725	1.3864	AP003071.5	protein_coding	135.871
ENSG00000174791	1.38605	RIN1	protein_coding	94.271
ENSG00000175591	1.38579	P2RY2	protein_coding	35.0331
ENSG00000140678	1.38571	ITGAX	protein_coding	32.1416
ENSG00000105376	1.38547	ICAM5	protein_coding	78.1009
ENSG00000131471	1.38123	AOC3	protein_coding	154.794
ENSG00000134013	1.38036	LOXL2	protein_coding	185.299
ENSG00000092929	1.37887	UNC13D	protein_coding	143.264
ENSG00000176909	1.37875	MAMSTR	protein_coding	47.5938
ENSG00000164086	1.37754	DUSP7	protein_coding	71.5806
ENSG00000123384	1.3752	LRP1	protein_coding	745.729
ENSG00000137474	1.37113	MYO7A	protein_coding	59.9643
ENSG00000198682	1.36823	PAPSS2	protein_coding	54.2695
ENSG00000167797	1.36694	CDK2AP2	protein_coding	39.6701
ENSG00000109736	1.36417	MFSD10	protein_coding	184.784
ENSG00000127415	1.36189	IDUA	protein_coding	100.683
ENSG00000139625	1.35886	MAP3K12	protein_coding	263.605
ENSG00000111886	1.35801	GABRR2	protein_coding	49.8857
ENSG00000006555	1.35554	TTC22	protein_coding	31.07
ENSG00000153531	1.35489	ADPRHL1	protein_coding	40.7517
ENSG00000137070	1.35488	IL11RA	protein_coding	180.5
ENSG00000178149	1.34936	DALRD3	protein_coding	144.58
ENSG00000176383	1.34784	B3GNT4	protein_coding	48.7843
ENSG00000125449	1.34781	ARMC7	protein_coding	168.747
ENSG00000275395	1.34759	FCGBP	protein_coding	114.951
ENSG00000150873	1.3431	C2orf50	protein_coding	32.8628
ENSG00000011028	1.34221	MRC2	protein_coding	68.3653
ENSG00000163793	1.3388	DNAJC5G	protein_coding	33.2943
ENSG00000138439	1.33579	FAM117B	protein_coding	288.669
ENSG00000166016	1.33565	ABTB2	protein_coding	81.5892
ENSG00000126005	1.33283	MMP24OS	protein_coding	177.15
ENSG00000122547	1.33131	EEPD1	protein_coding	101.547
ENSG00000176973	1.3255	FAM89B	protein_coding	49.9981
ENSG00000177169	1.32356	ULK1	protein_coding	170.402
ENSG00000115556	1.32147	PLCD4	protein_coding	70.9422
ENSG00000183386	1.32146	FHL3	protein_coding	86.9286
ENSG00000130653	1.31966	PNPLA7	protein_coding	64.2486
ENSG00000117308	1.31805	GALE	protein_coding	231.313
ENSG00000006283	1.31764	CACNA1G	protein_coding	120.451
ENSG00000132510	1.31634	KDM6B	protein_coding	337.505
ENSG00000100605	1.31239	ITPK1	protein_coding	165.314
ENSG00000142156	1.31182	COL6A1	protein_coding	251.836
ENSG00000075043	1.31179	KCNQ2	protein_coding	106.822
ENSG00000189077	1.31144	TMEM120A	protein_coding	37.9977
ENSG00000092295	1.30943	TGM1	protein_coding	47.5036
ENSG00000278619	1.3082	MRM1	protein_coding	111.75
ENSG00000131746	1.30799	TNS4	protein_coding	328.32
ENSG00000054967	1.30522	RELT	protein_coding	224.447
ENSG00000137648	1.30249	TMPRSS4	protein_coding	64.7287
ENSG00000135469	1.30216	COQ10A	protein_coding	69.8709
ENSG00000148516	1.30211	ZEB1	protein_coding	86.3325
ENSG00000143412	1.29794	ANXA9	protein_coding	62.2447
ENSG00000114853	1.29376	ZBTB47	protein_coding	72.7704
ENSG00000064601	1.29363	CTSA	protein_coding	417.937
ENSG00000007237	1.29257	AC005747.1	protein_coding	50.6316
ENSG00000165802	1.29203	NSMF	protein_coding	145.299
ENSG00000229474	1.28812	PATL2	protein_coding	39.9845
ENSG00000181873	1.28562	IBA57	protein_coding	147.521
ENSG00000105409	1.28256	ATP1A3	protein_coding	98.1385
ENSG00000160991	1.28239	ORAI2	protein_coding	173.917
ENSG00000100906	1.28215	NFKBIA	protein_coding	96.853
ENSG00000155980	1.28146	KIF5A	protein_coding	167.794
ENSG00000176022	1.28088	B3GALT6	protein_coding	69.2327
ENSG00000183682	1.27918	BMP8A	protein_coding	35.4924
ENSG00000196739	1.27688	COL27A1	protein_coding	294.248
ENSG00000171574	1.27665	ZNF584	protein_coding	216.968
ENSG00000132819	1.27013	RBM38	protein_coding	39.3272
ENSG00000185347	1.26882	TEDC1	protein_coding	101.42
ENSG00000132837	1.26691	DMGDH	protein_coding	46.6459
ENSG00000099139	1.26588	PCSK5	protein_coding	227.335
ENSG00000128271	1.26586	ADORA2A	protein_coding	51.4929
ENSG00000100350	1.26476	FOXRED2	protein_coding	145.187
ENSG00000225614	1.2609	ZNF469	protein_coding	179.575
ENSG00000173269	1.25892	MMRN2	protein_coding	73.9188
ENSG00000092758	1.25887	COL9A3	protein_coding	95.1596
ENSG00000131016	1.25828	AKAP12	protein_coding	18261.1
ENSG00000205085	1.25652	FAM71F2	protein_coding	139.855
ENSG00000178404	1.25357	CEP295NL	protein_coding	135.344
ENSG00000009950	1.25238	MLXIPL	protein_coding	520.485
ENSG00000167767	1.25001	KRT80	protein_coding	55.4992
ENSG00000129968	1.24969	ABHD17A	protein_coding	60.9457
ENSG00000186976	1.24956	EFCAB6	protein_coding	72.2335
ENSG00000161513	1.2458	FDXR	protein_coding	356.291
ENSG00000085514	1.2457	PILRA	protein_coding	48.4019
ENSG00000177548	1.24517	RABEP2	protein_coding	146.503
ENSG00000104936	1.24398	DMPK	protein_coding	330.575
ENSG00000159307	1.24372	SCUBE1	protein_coding	84.323
ENSG00000213930	1.24365	GALT	protein_coding	420.926
ENSG00000172183	1.23968	ISG20	protein_coding	136.848
ENSG00000101194	1.23714	SLC17A9	protein_coding	186.562
ENSG00000260456	1.23556	C16orf95	protein_coding	49.1307
ENSG00000102890	1.23485	ELMO3	protein_coding	109.128
ENSG00000089820	1.23416	ARHGAP4	protein_coding	218.738
ENSG00000149577	1.23313	SIDT2	protein_coding	394.02
ENSG00000067191	1.22582	CACNB1	protein_coding	144.537
ENSG00000110171	1.22533	TRIM3	protein_coding	243.337
ENSG00000140511	1.22003	HAPLN3	protein_coding	273.524
ENSG00000109103	1.21902	UNC119	protein_coding	454.291
ENSG00000125520	1.21746	SLC2A4RG	protein_coding	66.5262
ENSG00000196338	1.21621	NLGN3	protein_coding	84.6323
ENSG00000051523	1.21141	CYBA	protein_coding	221.813
ENSG00000183785	1.20992	TUBA8	protein_coding	60.3168
ENSG00000136717	1.20663	BIN1	protein_coding	78.7313
ENSG00000135835	1.20549	KIAA1614	protein_coding	41.6353
ENSG00000182272	1.20503	B4GALNT4	protein_coding	62.1617
ENSG00000132522	1.20416	GPS2	protein_coding	210.88
ENSG00000225697	1.20315	SLC26A6	protein_coding	729.121
ENSG00000117013	1.20267	KCNQ4	protein_coding	65.715
ENSG00000181035	1.20198	SLC25A42	protein_coding	53.4085
ENSG00000163975	1.20087	MELTF	protein_coding	326.528
ENSG00000169330	1.2004	MINAR1	protein_coding	328.134
ENSG00000090006	1.20031	LTBP4	protein_coding	457.309
ENSG00000204839	1.19535	MROH6	protein_coding	135.557
ENSG00000185730	1.19507	ZNF696	protein_coding	195.63
ENSG00000023839	1.19359	ABCC2	protein_coding	6674.18
ENSG00000090020	1.19345	SLC9A1	protein_coding	226.133
ENSG00000087884	1.19024	AAMDC	protein_coding	48.0156
ENSG00000101986	1.18969	ABCD1	protein_coding	89.1629
ENSG00000206561	1.18551	COLQ	protein_coding	138.07
ENSG00000140853	1.18513	NLRC5	protein_coding	187.24
ENSG00000116983	1.18397	HPCAL4	protein_coding	68.5596
ENSG00000131480	1.18235	AOC2	protein_coding	238.156
ENSG00000137103	1.18085	TMEM8B	protein_coding	391.334
ENSG00000125089	1.18014	SH3TC1	protein_coding	81.329
ENSG00000188766	1.17985	SPRED3	protein_coding	67.6565
ENSG00000204991	1.17886	SPIRE2	protein_coding	282.433
ENSG00000124216	1.17805	SNAI1	protein_coding	48.7432
ENSG00000169814	1.17757	BTD	protein_coding	178.467
ENSG00000050820	1.17755	BCAR1	protein_coding	258.963
ENSG00000090447	1.17668	TFAP4	protein_coding	98.1406
ENSG00000137558	1.17222	PI15	protein_coding	121.377
ENSG00000141756	1.17181	FKBP10	protein_coding	492.303
ENSG00000100418	1.17027	DESI1	protein_coding	767.094
ENSG00000110169	1.16931	HPX	protein_coding	51.8587
ENSG00000185000	1.16916	DGAT1	protein_coding	193.203
ENSG00000258947	1.16869	TUBB3	protein_coding	376.022
ENSG00000070404	1.16588	FSTL3	protein_coding	48.5464
ENSG00000173327	1.16494	MAP3K11	protein_coding	331.836
ENSG00000162733	1.16466	DDR2	protein_coding	247.579
ENSG00000142632	1.16302	ARHGEF19	protein_coding	259.843
ENSG00000197283	1.16175	SYNGAP1	protein_coding	212.355
ENSG00000197355	1.16044	UAP1L1	protein_coding	93.7208
ENSG00000102878	1.16038	HSF4	protein_coding	118.837
ENSG00000102786	1.15931	INTS6	protein_coding	2300.61
ENSG00000118514	1.15928	ALDH8A1	protein_coding	113.922
ENSG00000105711	1.15864	SCN1B	protein_coding	55.1815
ENSG00000099364	1.15828	FBXL19	protein_coding	139.307
ENSG00000162194	1.15628	LBHD1	protein_coding	200.282
ENSG00000258728	1.15614	AL162231.3	protein_coding	48.1436
ENSG00000176108	1.15442	CHMP6	protein_coding	88.7156
ENSG00000243811	1.15115	APOBEC3D	protein_coding	54.3949
ENSG00000284554	1.14811	AL022318.4	protein_coding	48.0684
ENSG00000128655	1.14661	PDE11A	protein_coding	64.4321
ENSG00000164889	1.14305	SLC4A2	protein_coding	459.513
ENSG00000071655	1.14106	MBD3	protein_coding	200.951
ENSG00000105327	1.14046	BBC3	protein_coding	56.8173
ENSG00000148408	1.14046	CACNA1B	protein_coding	78.1296
ENSG00000010310	1.1373	GIPR	protein_coding	155.835
ENSG00000121766	1.13564	ZCCHC17	protein_coding	156.977
ENSG00000198910	1.13531	L1CAM	protein_coding	82.6905
ENSG00000243244	1.13515	STON1	protein_coding	170.733
ENSG00000142235	1.13514	LMTK3	protein_coding	56.3106
ENSG00000173267	1.13032	SNCG	protein_coding	44.7848
ENSG00000149782	1.12726	PLCB3	protein_coding	355.428
ENSG00000187954	1.12651	CYHR1	protein_coding	481.204
ENSG00000173992	1.12591	CCS	protein_coding	200.922
ENSG00000149485	1.12337	FADS1	protein_coding	657.167
ENSG00000147324	1.12184	MFHAS1	protein_coding	152.486
ENSG00000257950	1.12179	P2RX5-TAX1BP3	protein_coding	106.629
ENSG00000126464	1.12002	PRR12	protein_coding	161.994
ENSG00000128274	1.11755	A4GALT	protein_coding	58.1453
ENSG00000161714	1.11724	PLCD3	protein_coding	181.414
ENSG00000141741	1.11667	MIEN1	protein_coding	64.8714
ENSG00000008853	1.11428	RHOBTB2	protein_coding	59.5519
ENSG00000006118	1.11366	TMEM132A	protein_coding	443.251
ENSG00000147813	1.11277	NAPRT	protein_coding	225.652
ENSG00000163435	1.1111	ELF3	protein_coding	505.213
ENSG00000129521	1.11061	EGLN3	protein_coding	48.6434
ENSG00000136950	1.1096	ARPC5L	protein_coding	174.451
ENSG00000108387	1.1044	SEPTIN4	protein_coding	64.6482
ENSG00000142409	1.10163	ZNF787	protein_coding	59.5624
ENSG00000183864	1.09964	TOB2	protein_coding	319.339
ENSG00000186204	1.09911	CYP4F12	protein_coding	89.2088
ENSG00000157216	1.09791	SSBP3	protein_coding	162.21
ENSG00000119929	1.09761	CUTC	protein_coding	263.535
ENSG00000143126	1.09557	CELSR2	protein_coding	256.322
ENSG00000103024	1.09261	NME3	protein_coding	55.1984
ENSG00000104368	1.09163	PLAT	protein_coding	58.423
ENSG00000110080	1.08898	ST3GAL4	protein_coding	49.768
ENSG00000115194	1.08877	SLC30A3	protein_coding	142.204
ENSG00000087088	1.08837	BAX	protein_coding	167.488
ENSG00000100075	1.0882	SLC25A1	protein_coding	67.6022
ENSG00000178057	1.08791	NDUFAF3	protein_coding	72.3325
ENSG00000158158	1.08733	CNNM4	protein_coding	140.624
ENSG00000198718	1.08699	TOGARAM1	protein_coding	106.061
ENSG00000162231	1.08394	NXF1	protein_coding	497.096
ENSG00000188818	1.08095	ZDHHC11	protein_coding	397.495
ENSG00000143847	1.08063	PPFIA4	protein_coding	261.847
ENSG00000262560	1.07984	AC018512.1	protein_coding	78.7682
ENSG00000166839	1.07895	ANKDD1A	protein_coding	159.716
ENSG00000198929	1.0786	NOS1AP	protein_coding	233.753
ENSG00000146733	1.07646	PSPH	protein_coding	120.374
ENSG00000198830	1.07542	HMGN2	protein_coding	140.385
ENSG00000179364	1.07487	PACS2	protein_coding	295.472
ENSG00000112658	1.06975	SRF	protein_coding	77.6051
ENSG00000187838	1.06613	PLSCR3	protein_coding	115.145
ENSG00000262481	1.06558	TMEM256-PLSCR3	protein_coding	91.5585
ENSG00000127124	1.06436	HIVEP3	protein_coding	300.972
ENSG00000168237	1.06405	GLYCTK	protein_coding	156.05
ENSG00000007047	1.0619	MARK4	protein_coding	292.432
ENSG00000102977	1.06024	ACD	protein_coding	63.3629
ENSG00000100490	1.05854	CDKL1	protein_coding	55.6588
ENSG00000150637	1.05766	CD226	protein_coding	205.156
ENSG00000148400	1.05481	NOTCH1	protein_coding	488.206
ENSG00000161091	1.05451	MFSD12	protein_coding	358.472
ENSG00000141337	1.05282	ARSG	protein_coding	377.987
ENSG00000149927	1.052	DOC2A	protein_coding	198.814
ENSG00000143067	1.04811	ZNF697	protein_coding	176.623
ENSG00000165804	1.04796	ZNF219	protein_coding	122.96
ENSG00000142621	1.0475	FHAD1	protein_coding	295.229
ENSG00000189319	1.04401	FAM53B	protein_coding	246.161
ENSG00000198246	1.04106	SLC29A3	protein_coding	77.0924
ENSG00000197019	1.04051	SERTAD1	protein_coding	54.7858
ENSG00000106211	1.03991	HSPB1	protein_coding	82.1787
ENSG00000185561	1.03687	TLCD2	protein_coding	69.6108
ENSG00000172081	1.03589	MOB3A	protein_coding	110.756
ENSG00000235173	1.03568	HGH1	protein_coding	91.0576
ENSG00000163870	1.03513	TPRA1	protein_coding	197.723
ENSG00000262660	1.03498	AC139530.2	protein_coding	77.9964
ENSG00000173281	1.03493	PPP1R3B	protein_coding	124.197
ENSG00000183048	1.029	SLC25A10	protein_coding	109.629
ENSG00000260729	1.02753	AC009690.1	protein_coding	185.664
ENSG00000187266	1.02736	EPOR	protein_coding	112.905
ENSG00000075426	1.02542	FOSL2	protein_coding	188.701
ENSG00000074855	1.02378	ANO8	protein_coding	106.976
ENSG00000102854	1.02249	MSLN	protein_coding	132.308
ENSG00000067836	1.02216	ROGDI	protein_coding	85.2147
ENSG00000035664	1.02207	DAPK2	protein_coding	93.0371
ENSG00000127663	1.02082	KDM4B	protein_coding	364.978
ENSG00000242612	1.02071	DECR2	protein_coding	68.6569
ENSG00000111275	1.02	ALDH2	protein_coding	90.3561
ENSG00000151623	1.01967	NR3C2	protein_coding	77.5413
ENSG00000110328	1.01963	GALNT18	protein_coding	100.561
ENSG00000137312	1.01798	FLOT1	protein_coding	561.366
ENSG00000142273	1.01515	CBLC	protein_coding	260.488
ENSG00000172530	1.01446	BANP	protein_coding	366.466
ENSG00000166165	1.01328	CKB	protein_coding	137.39
ENSG00000108932	1.01061	SLC16A6	protein_coding	74.956
ENSG00000172830	1.01004	SSH3	protein_coding	151.19
ENSG00000275023	1.00914	MLLT6	protein_coding	774.876
ENSG00000169902	1.00778	TPST1	protein_coding	208.779
ENSG00000064687	1.00737	ABCA7	protein_coding	858.98
ENSG00000179029	1.00728	TMEM107	protein_coding	461.731
ENSG00000139044	1.00459	B4GALNT3	protein_coding	134.435
ENSG00000160767	1.00351	FAM189B	protein_coding	100.109
ENSG00000103415	1.00309	HMOX2	protein_coding	142.33
ENSG00000135924	1.00291	DNAJB2	protein_coding	188.999
ENSG00000113108	1.00234	APBB3	protein_coding	278.185
ENSG00000091622	1.00214	PITPNM3	protein_coding	181.59
ENSG00000234127	1.00117	TRIM26	protein_coding	287.228
ENSG00000175048	1.0007	ZDHHC14	protein_coding	134.092
ENSG00000103888	1.00054	CEMIP	protein_coding	135.832
ENSG00000242802	1.00002	AP5Z1	protein_coding	210.463

## Sheet: Z4_mRNA_up_noRT
gene.log2FC	gene.name	gene.biotype	gene.expression
ENSG00000137809	7.39878	ITGA11	protein_coding	14.897
ENSG00000107736	6.88925	CDH23	protein_coding	10.3861
ENSG00000074771	5.87881	NOX3	protein_coding	5.33831
ENSG00000155849	5.78538	ELMO1	protein_coding	13.1565
ENSG00000128918	5.7307	ALDH1A2	protein_coding	153.308
ENSG00000145920	5.36444	CPLX2	protein_coding	28.6624
ENSG00000126856	5.34958	PRDM7	protein_coding	30.5324
ENSG00000142623	5.02914	PADI1	protein_coding	8.45752
ENSG00000175018	4.705	TEX36	protein_coding	11.9929
ENSG00000196569	4.40401	LAMA2	protein_coding	517.571
ENSG00000120457	3.73877	KCNJ5	protein_coding	37.77
ENSG00000139767	3.44407	SRRM4	protein_coding	10.8348
ENSG00000269113	3.40072	TRABD2B	protein_coding	12.596
ENSG00000137674	3.34896	MMP20	protein_coding	20.066
ENSG00000172738	3.18	TMEM217	protein_coding	29.8316
ENSG00000163803	3.12541	PLB1	protein_coding	36.4525
ENSG00000172935	3.05697	MRGPRF	protein_coding	13.7963
ENSG00000171502	3.03556	COL24A1	protein_coding	47.2689
ENSG00000133067	2.98847	LGR6	protein_coding	16.673
ENSG00000041515	2.87227	MYO16	protein_coding	36.7325
ENSG00000113721	2.83417	PDGFRB	protein_coding	26.9091
ENSG00000183775	2.81945	KCTD16	protein_coding	110.934
ENSG00000112139	2.79395	MDGA1	protein_coding	49.2355
ENSG00000168959	2.787	GRM5	protein_coding	40.5333
ENSG00000029534	2.68925	ANK1	protein_coding	54.207
ENSG00000104814	2.59499	MAP4K1	protein_coding	19.2551
ENSG00000197467	2.57259	COL13A1	protein_coding	116.412
ENSG00000184471	2.56915	C1QTNF8	protein_coding	21.1844
ENSG00000231738	2.45442	TSPAN19	protein_coding	22.6496
ENSG00000204301	2.45091	NOTCH4	protein_coding	26.0207
ENSG00000082781	2.36618	ITGB5	protein_coding	813.889
ENSG00000099365	1.99591	STX1B	protein_coding	48.4679
ENSG00000095637	1.88614	SORBS1	protein_coding	88.8498
ENSG00000166833	1.85983	NAV2	protein_coding	109.948
ENSG00000175449	1.70513	RFESD	protein_coding	102.531
ENSG00000104081	1.70255	BMF	protein_coding	82.4979
ENSG00000145431	1.70219	PDGFC	protein_coding	291.27
ENSG00000074047	1.69819	GLI2	protein_coding	44.8811
ENSG00000166432	1.69113	ZMAT1	protein_coding	228.45
ENSG00000125827	1.65763	TMX4	protein_coding	174.146
ENSG00000005187	1.63559	ACSM3	protein_coding	40.3706
ENSG00000115414	1.6092	FN1	protein_coding	460.878
ENSG00000124767	1.59537	GLO1	protein_coding	587.076
ENSG00000102897	1.57782	LYRM1	protein_coding	280.342
ENSG00000110200	1.57574	ANAPC15	protein_coding	120.342
ENSG00000157601	1.52678	MX1	protein_coding	57.366
ENSG00000227268	1.51314	KLLN	protein_coding	70.4345
ENSG00000112182	1.50734	BACH2	protein_coding	155.996
ENSG00000050344	1.48044	NFE2L3	protein_coding	343.916
ENSG00000118523	1.47034	CCN2	protein_coding	53.1226
ENSG00000164823	1.45789	OSGIN2	protein_coding	372.127
ENSG00000163328	1.44734	GPR155	protein_coding	82.1343
ENSG00000106799	1.4354	TGFBR1	protein_coding	575.164
ENSG00000115902	1.43424	SLC1A4	protein_coding	111.666
ENSG00000155085	1.42532	AK9	protein_coding	207.535
ENSG00000076706	1.41621	MCAM	protein_coding	70.8976
ENSG00000181826	1.34154	RELL1	protein_coding	213.797
ENSG00000102786	1.33191	INTS6	protein_coding	3170.67
ENSG00000076716	1.31189	GPC4	protein_coding	164.867
ENSG00000177000	1.29101	MTHFR	protein_coding	529.671
ENSG00000133597	1.28165	ADCK2	protein_coding	106.594
ENSG00000169814	1.26713	BTD	protein_coding	215.54
ENSG00000183778	1.2598	B3GALT5	protein_coding	140.386
ENSG00000141404	1.25933	GNAL	protein_coding	62.8266
ENSG00000113594	1.20894	LIFR	protein_coding	454.789
ENSG00000153214	1.19883	TMEM87B	protein_coding	486.174
ENSG00000136159	1.19239	NUDT15	protein_coding	84.3078
ENSG00000151693	1.18836	ASAP2	protein_coding	583.964
ENSG00000198208	1.17755	RPS6KL1	protein_coding	124.33
ENSG00000175548	1.15419	ALG10B	protein_coding	421.013
ENSG00000152104	1.15385	PTPN14	protein_coding	4619.35
ENSG00000163644	1.14782	PPM1K	protein_coding	231.532
ENSG00000205189	1.14344	ZBTB10	protein_coding	1247.75
ENSG00000164938	1.13674	TP53INP1	protein_coding	1342.75
ENSG00000137821	1.13485	LRRC49	protein_coding	125.369
ENSG00000124374	1.13466	PAIP2B	protein_coding	104.785
ENSG00000155111	1.12093	CDK19	protein_coding	477.384
ENSG00000133083	1.11272	DCLK1	protein_coding	451.663
ENSG00000204569	1.10763	PPP1R10	protein_coding	1857.96
ENSG00000008513	1.10642	ST3GAL1	protein_coding	221.649
ENSG00000188542	1.08965	DUSP28	protein_coding	106.26
ENSG00000139629	1.05764	GALNT6	protein_coding	148.881
ENSG00000108821	1.05199	COL1A1	protein_coding	182.202
ENSG00000145331	1.03334	TRMT10A	protein_coding	244
ENSG00000116237	1.03027	ICMT	protein_coding	641.336
ENSG00000106066	1.02457	CPVL	protein_coding	146.386
ENSG00000188177	1.01998	ZC3H6	protein_coding	771.872
ENSG00000096696	1.00669	DSP	protein_coding	5489.26
ENSG00000137868	8.16887	STRA6	protein_coding	25.2903
ENSG00000158125	7.38635	XDH	protein_coding	15.2819
ENSG00000184349	7.25102	EFNA5	protein_coding	13.4926
ENSG00000184697	7.16441	CLDN6	protein_coding	12.8612
ENSG00000198796	6.88731	ALPK2	protein_coding	111.304
ENSG00000169067	6.72084	ACTBL2	protein_coding	9.34103
ENSG00000134183	6.54065	GNAT2	protein_coding	23.028
ENSG00000286105	6.4863	AL353579.1	protein_coding	8.03827
ENSG00000175489	6.21553	LRRC25	protein_coding	6.49222
ENSG00000165376	6.17809	CLDN2	protein_coding	6.53225
ENSG00000148346	6.17087	LCN2	protein_coding	17.152
ENSG00000139269	6.11749	INHBE	protein_coding	6.3218
ENSG00000189167	6.0944	ZAR1L	protein_coding	6.26738
ENSG00000163810	5.89931	TGM4	protein_coding	14.7937
ENSG00000182521	5.60295	TBPL2	protein_coding	11.5016
ENSG00000155465	5.42288	SLC7A7	protein_coding	29.0648
ENSG00000047617	5.09048	ANO2	protein_coding	8.22467
ENSG00000174226	5.01692	SNX31	protein_coding	7.6621
ENSG00000131771	4.83607	PPP1R1B	protein_coding	15.0097
ENSG00000091129	4.78846	NRCAM	protein_coding	12.7187
ENSG00000221843	4.66344	C2orf16	protein_coding	18.5779
ENSG00000164404	4.63984	GDF9	protein_coding	71.9885
ENSG00000109113	4.5121	RAB34	protein_coding	15.7067
ENSG00000187688	4.44381	TRPV2	protein_coding	36.0714
ENSG00000163606	4.41282	CD200R1	protein_coding	9.86268
ENSG00000188277	4.40335	C15orf62	protein_coding	15.2281
ENSG00000165805	4.08266	C12orf50	protein_coding	8.5967
ENSG00000010671	3.91618	BTK	protein_coding	11.3198
ENSG00000175189	3.90936	INHBC	protein_coding	10.3139
ENSG00000133800	3.83882	LYVE1	protein_coding	13.1931
ENSG00000170909	3.81569	OSCAR	protein_coding	16.1811
ENSG00000145949	3.81113	MYLK4	protein_coding	50.647
ENSG00000186265	3.77992	BTLA	protein_coding	9.58095
ENSG00000276180	3.6533	H4C9	protein_coding	32.4046
ENSG00000111863	3.62441	ADTRP	protein_coding	21.4833
ENSG00000213654	3.53604	GPSM3	protein_coding	22.0138
ENSG00000148082	3.5332	SHC3	protein_coding	65.2467
ENSG00000153283	3.50259	CD96	protein_coding	24.1023
ENSG00000232070	3.45125	TMEM253	protein_coding	11.6374
ENSG00000188039	3.40304	NWD1	protein_coding	131.644
ENSG00000138823	3.39088	MTTP	protein_coding	35.7262
ENSG00000138696	3.37065	BMPR1B	protein_coding	12.8321
ENSG00000144820	3.33528	ADGRG7	protein_coding	15.3888
ENSG00000139899	3.27892	CBLN3	protein_coding	47.0642
ENSG00000135960	3.25403	EDAR	protein_coding	181.589
ENSG00000114854	3.20057	TNNC1	protein_coding	34.0328
ENSG00000260314	3.19105	MRC1	protein_coding	13.4395
ENSG00000134548	3.17642	SPX	protein_coding	11.2789
ENSG00000188596	3.15578	CFAP54	protein_coding	33.0677
ENSG00000169085	3.13545	VXN	protein_coding	30.9071
ENSG00000168356	3.13427	SCN11A	protein_coding	17.1764
ENSG00000152689	3.0746	RASGRP3	protein_coding	31.1111
ENSG00000174844	3.03842	DNAH12	protein_coding	64.7805
ENSG00000110693	3.01771	SOX6	protein_coding	36.1052
ENSG00000121454	3.0152	LHX4	protein_coding	22.5777
ENSG00000234465	3.00826	PINLYP	protein_coding	14.9334
ENSG00000168490	2.99243	PHYHIP	protein_coding	29.057
ENSG00000089250	2.98572	NOS1	protein_coding	16.9707
ENSG00000185634	2.98364	SHC4	protein_coding	45.1163
ENSG00000148735	2.95649	PLEKHS1	protein_coding	15.1622
ENSG00000221963	2.94394	APOL6	protein_coding	30.4157
ENSG00000123612	2.94252	ACVR1C	protein_coding	55.086
ENSG00000026025	2.92313	VIM	protein_coding	70.7363
ENSG00000186854	2.9104	TRABD2A	protein_coding	29.2505
ENSG00000108515	2.90695	ENO3	protein_coding	197.323
ENSG00000120833	2.86093	SOCS2	protein_coding	117.208
ENSG00000074706	2.85697	IPCEF1	protein_coding	14.7781
ENSG00000215018	2.85555	COL28A1	protein_coding	59.0581
ENSG00000148483	2.78088	TMEM236	protein_coding	53.4308
ENSG00000092969	2.77517	TGFB2	protein_coding	31.82
ENSG00000222047	2.76862	C10orf55	protein_coding	13.6058
ENSG00000203697	2.72996	CAPN8	protein_coding	93.6944
ENSG00000151468	2.71655	CCDC3	protein_coding	41.9696
ENSG00000157343	2.70904	ARMC12	protein_coding	15.8543
ENSG00000182326	2.62901	C1S	protein_coding	56.7731
ENSG00000108379	2.61935	WNT3	protein_coding	111.483
ENSG00000135407	2.59863	AVIL	protein_coding	69.6291
ENSG00000272031	2.58753	ANKRD34A	protein_coding	68.9393
ENSG00000173706	2.58256	HEG1	protein_coding	63.1459
ENSG00000285791	2.5768	AC009879.3	protein_coding	37.1634
ENSG00000119681	2.57271	LTBP2	protein_coding	246.547
ENSG00000214842	2.5123	RAD51AP2	protein_coding	38.247
ENSG00000103184	2.50347	SEC14L5	protein_coding	52.4399
ENSG00000204311	2.49327	PJVK	protein_coding	104.459
ENSG00000101605	2.48175	MYOM1	protein_coding	47.6964
ENSG00000170965	2.47891	PLAC1	protein_coding	20.4914
ENSG00000124116	2.46213	WFDC3	protein_coding	20.521
ENSG00000164683	2.45716	HEY1	protein_coding	18.8934
ENSG00000177494	2.44513	ZBED2	protein_coding	98.2882
ENSG00000165072	2.43	MAMDC2	protein_coding	63.053
ENSG00000167779	2.412	IGFBP6	protein_coding	69.3456
ENSG00000163817	2.41188	SLC6A20	protein_coding	113.756
ENSG00000257335	2.38122	MGAM	protein_coding	82.1638
ENSG00000131379	2.38014	C3orf20	protein_coding	32.9791
ENSG00000168412	2.3524	MTNR1A	protein_coding	17.5178
ENSG00000127152	2.29248	BCL11B	protein_coding	21.0098
ENSG00000173269	2.28276	MMRN2	protein_coding	185.182
ENSG00000212724	2.27584	KRTAP2-3	protein_coding	45.8605
ENSG00000049323	2.2269	LTBP1	protein_coding	153.413
ENSG00000170175	2.22245	CHRNB1	protein_coding	107.866
ENSG00000176438	2.20599	SYNE3	protein_coding	209.434
ENSG00000204314	2.19464	PRRT1	protein_coding	39.2068
ENSG00000110799	2.18683	VWF	protein_coding	34.0145
ENSG00000239887	2.18267	C1orf226	protein_coding	238.506
ENSG00000198929	2.18228	NOS1AP	protein_coding	175.159
ENSG00000125864	2.17785	BFSP1	protein_coding	269.551
ENSG00000123901	2.15308	GPR83	protein_coding	41.9258
ENSG00000163354	2.14738	DCST2	protein_coding	21.241
ENSG00000166323	2.13026	C11orf65	protein_coding	60.7478
ENSG00000196159	2.12661	FAT4	protein_coding	560.809
ENSG00000107742	2.12405	SPOCK2	protein_coding	66.5763
ENSG00000180592	2.11334	SKIDA1	protein_coding	32.8613
ENSG00000170500	2.11286	LONRF2	protein_coding	1180.28
ENSG00000179397	2.10673	CATSPERE	protein_coding	43.2093
ENSG00000132026	2.10496	RTBDN	protein_coding	32.5268
ENSG00000205464	2.09524	ATP6AP1L	protein_coding	712.181
ENSG00000163666	2.09217	HESX1	protein_coding	22.1316
ENSG00000105329	2.04293	TGFB1	protein_coding	51.5727
ENSG00000144369	2.03408	FAM171B	protein_coding	255.74
ENSG00000105479	2.02294	CCDC114	protein_coding	64.3165
ENSG00000176244	1.95745	ACBD7	protein_coding	26.4293
ENSG00000274070	1.94474	CASTOR2	protein_coding	624.896
ENSG00000132535	1.94354	DLG4	protein_coding	116.396
ENSG00000112394	1.94346	SLC16A10	protein_coding	138.685
ENSG00000135318	1.93469	NT5E	protein_coding	1413.07
ENSG00000137834	1.93266	SMAD6	protein_coding	338.757
ENSG00000117525	1.92664	F3	protein_coding	269.159
ENSG00000035862	1.90735	TIMP2	protein_coding	766.674
ENSG00000163116	1.90215	STPG2	protein_coding	50.4692
ENSG00000171310	1.89925	CHST11	protein_coding	347.069
ENSG00000136603	1.88464	SKIL	protein_coding	508.227
ENSG00000119655	1.87137	NPC2	protein_coding	599.872
ENSG00000133816	1.87059	MICAL2	protein_coding	460.396
ENSG00000004139	1.87034	SARM1	protein_coding	101.269
ENSG00000181577	1.86294	C6orf223	protein_coding	170.618
ENSG00000162946	1.86283	DISC1	protein_coding	60.4793
ENSG00000002745	1.85661	WNT16	protein_coding	333.603
ENSG00000162999	1.85055	DUSP19	protein_coding	126.305
ENSG00000172159	1.84988	FRMD3	protein_coding	50.7915
ENSG00000105997	1.83215	HOXA3	protein_coding	32.6793
ENSG00000007237	1.82873	AC005747.1	protein_coding	57.3914
ENSG00000170689	1.82849	HOXB9	protein_coding	181.847
ENSG00000147862	1.82304	NFIB	protein_coding	382.894
ENSG00000134245	1.82128	WNT2B	protein_coding	93.3754
ENSG00000196754	1.81685	S100A2	protein_coding	126.475
ENSG00000092931	1.80689	MFSD11	protein_coding	714.082
ENSG00000253598	1.79207	SLC10A5	protein_coding	151.688
ENSG00000254706	1.79097	AL512785.2	protein_coding	55.4132
ENSG00000148158	1.79094	SNX30	protein_coding	478.369
ENSG00000133687	1.7877	TMTC1	protein_coding	33.574
ENSG00000172382	1.78104	PRSS27	protein_coding	42.3302
ENSG00000180667	1.77025	YOD1	protein_coding	2032.03
ENSG00000074590	1.74646	NUAK1	protein_coding	330.863
ENSG00000177854	1.74458	TMEM187	protein_coding	50.6707
ENSG00000012124	1.73076	CD22	protein_coding	96.7332
ENSG00000108733	1.72469	PEX12	protein_coding	172.563
ENSG00000143153	1.72152	ATP1B1	protein_coding	687.716
ENSG00000111962	1.71001	UST	protein_coding	90.3849
ENSG00000169504	1.69795	CLIC4	protein_coding	836.384
ENSG00000176399	1.68765	DMRTA1	protein_coding	61.0976
ENSG00000107957	1.68165	SH3PXD2A	protein_coding	211.933
ENSG00000115107	1.67363	STEAP3	protein_coding	315.357
ENSG00000274386	1.67195	TMEM269	protein_coding	51.7658
ENSG00000133639	1.6698	BTG1	protein_coding	337.946
ENSG00000174255	1.65037	ZNF80	protein_coding	37.2483
ENSG00000260456	1.643	C16orf95	protein_coding	49.6661
ENSG00000151532	1.62775	VTI1A	protein_coding	3699.1
ENSG00000179163	1.62635	FUCA1	protein_coding	257.792
ENSG00000131471	1.62254	AOC3	protein_coding	68.8158
ENSG00000186231	1.61487	KLHL32	protein_coding	63.0978
ENSG00000157653	1.60537	C9orf43	protein_coding	54.4359
ENSG00000164484	1.57524	TMEM200A	protein_coding	51.4593
ENSG00000100784	1.57494	RPS6KA5	protein_coding	338.079
ENSG00000166147	1.56975	FBN1	protein_coding	75.6149
ENSG00000173530	1.54957	TNFRSF10D	protein_coding	1364.2
ENSG00000092529	1.54468	CAPN3	protein_coding	287.002
ENSG00000124788	1.54368	ATXN1	protein_coding	1760.51
ENSG00000106415	1.53346	GLCCI1	protein_coding	116.205
ENSG00000138439	1.53327	FAM117B	protein_coding	249.027
ENSG00000139946	1.5267	PELI2	protein_coding	54.0148
ENSG00000121236	1.5249	TRIM6	protein_coding	94.9036
ENSG00000258064	1.5154	AC073612.1	protein_coding	68.0492
ENSG00000258839	1.49052	MC1R	protein_coding	130.908
ENSG00000143578	1.4875	CREB3L4	protein_coding	173.294
ENSG00000275395	1.48643	FCGBP	protein_coding	78.0943
ENSG00000139174	1.48498	PRICKLE1	protein_coding	153.994
ENSG00000114115	1.47102	RBP1	protein_coding	524.046
ENSG00000161040	1.46363	FBXL13	protein_coding	53.8395
ENSG00000164088	1.46356	PPM1M	protein_coding	52.2767
ENSG00000258461	1.46144	AC012651.1	protein_coding	149.564
ENSG00000117407	1.46097	ARTN	protein_coding	68.6355
ENSG00000151967	1.45692	SCHIP1	protein_coding	138.571
ENSG00000128245	1.44856	YWHAH	protein_coding	530.841
ENSG00000163132	1.44454	MSX1	protein_coding	254.678
ENSG00000178202	1.44407	POGLUT3	protein_coding	316.18
ENSG00000214960	1.42662	CRPPA	protein_coding	246.24
ENSG00000164294	1.42274	GPX8	protein_coding	427.719
ENSG00000168077	1.41772	SCARA3	protein_coding	279.942
ENSG00000134574	1.41745	DDB2	protein_coding	1046.16
ENSG00000147394	1.4158	ZNF185	protein_coding	280.69
ENSG00000185278	1.40687	ZBTB37	protein_coding	3251.86
ENSG00000158571	1.40415	PFKFB1	protein_coding	64.5489
ENSG00000203668	1.40228	CHML	protein_coding	674.347
ENSG00000136111	1.40178	TBC1D4	protein_coding	1298.29
ENSG00000119138	1.39973	KLF9	protein_coding	83.0425
ENSG00000130270	1.39749	ATP8B3	protein_coding	153.922
ENSG00000164674	1.39619	SYTL3	protein_coding	905.312
ENSG00000175197	1.38583	DDIT3	protein_coding	257.746
ENSG00000152332	1.38229	UHMK1	protein_coding	3022.27
ENSG00000175155	1.38117	YPEL2	protein_coding	202.884
ENSG00000110013	1.38035	SIAE	protein_coding	234.447
ENSG00000162520	1.37369	SYNC	protein_coding	80.0208
ENSG00000182685	1.36942	BRICD5	protein_coding	73.0553
ENSG00000152078	1.36862	TLCD4	protein_coding	130.644
ENSG00000059804	1.36532	SLC2A3	protein_coding	78.7864
ENSG00000164684	1.36527	ZNF704	protein_coding	1770.9
ENSG00000182308	1.35916	DCAF4L1	protein_coding	107.928
ENSG00000100625	1.35737	SIX4	protein_coding	666.736
ENSG00000185585	1.35648	OLFML2A	protein_coding	65.9179
ENSG00000058804	1.35415	NDC1	protein_coding	1062.72
ENSG00000122592	1.34408	HOXA7	protein_coding	78.7998
ENSG00000214013	1.34287	GANC	protein_coding	606.615
ENSG00000156804	1.34213	FBXO32	protein_coding	78.8741
ENSG00000086570	1.32974	FAT2	protein_coding	135.3
ENSG00000167601	1.32812	AXL	protein_coding	1100.03
ENSG00000145779	1.32696	TNFAIP8	protein_coding	113.342
ENSG00000003137	1.32645	CYP26B1	protein_coding	237.019
ENSG00000060642	1.32243	PIGV	protein_coding	309.022
ENSG00000162344	1.31499	FGF19	protein_coding	187.316
ENSG00000145244	1.31166	CORIN	protein_coding	425.392
ENSG00000166130	1.31157	IKBIP	protein_coding	274.852
ENSG00000137936	1.30904	BCAR3	protein_coding	434.929
ENSG00000196323	1.28952	ZBTB44	protein_coding	611.752
ENSG00000186889	1.28789	TMEM17	protein_coding	63.3924
ENSG00000172731	1.28066	LRRC20	protein_coding	232.078
ENSG00000141232	1.27939	TOB1	protein_coding	506.062
ENSG00000139625	1.27831	MAP3K12	protein_coding	213.133
ENSG00000171617	1.27556	ENC1	protein_coding	1669.84
ENSG00000173451	1.2712	THAP2	protein_coding	158.555
ENSG00000105887	1.27026	MTPN	protein_coding	888.445
ENSG00000143320	1.27021	CRABP2	protein_coding	607.556
ENSG00000151012	1.26896	SLC7A11	protein_coding	4490.05
ENSG00000133805	1.26833	AMPD3	protein_coding	388.656
ENSG00000099219	1.26633	ERMP1	protein_coding	777.838
ENSG00000288380	1.26606	AC118281.1	protein_coding	134.792
ENSG00000138629	1.25417	UBL7	protein_coding	117.79
ENSG00000131941	1.25074	RHPN2	protein_coding	354.432
ENSG00000153885	1.24513	KCTD15	protein_coding	123.622
ENSG00000111266	1.23766	DUSP16	protein_coding	338.196
ENSG00000170385	1.23399	SLC30A1	protein_coding	707.241
ENSG00000168152	1.23132	THAP9	protein_coding	203.039
ENSG00000146757	1.20518	ZNF92	protein_coding	623.04
ENSG00000146733	1.20379	PSPH	protein_coding	230.336
ENSG00000163491	1.19728	NEK10	protein_coding	94.2784
ENSG00000143067	1.19606	ZNF697	protein_coding	277.183
ENSG00000183049	1.1932	CAMK1D	protein_coding	132.056
ENSG00000072571	1.18828	HMMR	protein_coding	2470.65
ENSG00000197860	1.18491	SGTB	protein_coding	241.758
ENSG00000175575	1.17795	PAAF1	protein_coding	111.303
ENSG00000146411	1.1762	SLC2A12	protein_coding	231.165
ENSG00000260027	1.17547	HOXB7	protein_coding	273.98
ENSG00000157654	1.1752	PALM2AKAP2	protein_coding	408.427
ENSG00000224531	1.1726	SMIM13	protein_coding	311.762
ENSG00000155592	1.17174	ZKSCAN2	protein_coding	457.663
ENSG00000126016	1.17007	AMOT	protein_coding	158.991
ENSG00000180398	1.16617	MCFD2	protein_coding	1390.15
ENSG00000273079	1.16276	GRIN2B	protein_coding	1001.64
ENSG00000188493	1.16158	C19orf54	protein_coding	181.917
ENSG00000158186	1.16098	MRAS	protein_coding	95.5418
ENSG00000134986	1.15309	NREP	protein_coding	98.3121
ENSG00000137819	1.15269	PAQR5	protein_coding	198.386
ENSG00000154914	1.14795	USP43	protein_coding	186.738
ENSG00000139318	1.14674	DUSP6	protein_coding	2487.63
ENSG00000144821	1.13459	MYH15	protein_coding	1341.87
ENSG00000078804	1.13297	TP53INP2	protein_coding	92.2747
ENSG00000085365	1.13231	SCAMP1	protein_coding	437.787
ENSG00000139546	1.13201	TARBP2	protein_coding	295.92
ENSG00000203943	1.12083	SAMD13	protein_coding	184.321
ENSG00000196155	1.11992	AC040160.1	protein_coding	284.325
ENSG00000118922	1.11986	KLF12	protein_coding	315.448
ENSG00000172339	1.11542	ALG14	protein_coding	130.567
ENSG00000144959	1.11321	NCEH1	protein_coding	257.266
ENSG00000278129	1.11166	ZNF8	protein_coding	842.593
ENSG00000164463	1.10811	CREBRF	protein_coding	544.122
ENSG00000114796	1.0991	KLHL24	protein_coding	579.854
ENSG00000124602	1.09769	UNC5CL	protein_coding	107.721
ENSG00000124380	1.09663	SNRNP27	protein_coding	122.992
ENSG00000213625	1.0933	LEPROT	protein_coding	587.946
ENSG00000197140	1.09171	ADAM32	protein_coding	405.674
ENSG00000214654	1.08991	B3GNT10	protein_coding	134.769
ENSG00000135205	1.0861	CCDC146	protein_coding	114.848
ENSG00000014914	1.08541	MTMR11	protein_coding	222.3
ENSG00000170004	1.08422	CHD3	protein_coding	1216.12
ENSG00000176105	1.08081	YES1	protein_coding	879.411
ENSG00000174306	1.07827	ZHX3	protein_coding	383.227
ENSG00000139289	1.0775	PHLDA1	protein_coding	2464.75
ENSG00000109189	1.072	USP46	protein_coding	1303.49
ENSG00000239521	1.07037	CASTOR3	protein_coding	306.186
ENSG00000137076	1.06221	TLN1	protein_coding	2157.52
ENSG00000175832	1.05613	ETV4	protein_coding	243.875
ENSG00000156521	1.04982	TYSND1	protein_coding	139.416
ENSG00000181722	1.04712	ZBTB20	protein_coding	18443.7
ENSG00000008405	1.0433	CRY1	protein_coding	343.332
ENSG00000108784	1.04175	NAGLU	protein_coding	139.755
ENSG00000108840	1.03981	HDAC5	protein_coding	159.87
ENSG00000105339	1.02953	DENND3	protein_coding	632.199
ENSG00000171150	1.02857	SOCS5	protein_coding	604.704
ENSG00000184557	1.02599	SOCS3	protein_coding	210.376
ENSG00000136153	1.02566	LMO7	protein_coding	417.313
ENSG00000119729	1.02437	RHOQ	protein_coding	173.128
ENSG00000127334	1.02105	DYRK2	protein_coding	748.274
ENSG00000101974	1.01061	ATP11C	protein_coding	645.225
ENSG00000109436	1.01038	TBC1D9	protein_coding	257.583
ENSG00000136451	1.00305	VEZF1	protein_coding	1089.39
