# Supplementary material for: ZC3H4 restricts non-coding transcription in human cells
Source: eLife. 2021 Apr 29;10:e67305. doi: 10.7554/eLife.67305 (PMC8137146; doi:10.7554/eLife.67305)
Supplement: Supplementary file 5. — Genes in each set were manually checked for upregulation (TRUE) or possible artefacts – primarily transcription from surrounding region into a gene that is consequently scored as upregulated (FALSE). [file elife-67305-supp5.xlsx]

## Sheet: upregulated_zc3h4
baseMean	log2FoldChange	lfcSE	stat	pvalue	padj	gene_name	gene_biotype	gene_id	Manual Curration Result
24.0121	5.46841	1.24013	4.40955	1.03585e-05	0.000664486	SMC1B	protein_coding	ENSG00000077935	TRUE
33.2997	5.37414	1.04386	5.14833	2.62819e-07	3.11952e-05	KCTD16	protein_coding	ENSG00000183775	TRUE
91.7801	4.8655	0.62554	7.77808	7.36337e-15	7.93621e-12	GNAT2	protein_coding	ENSG00000134183	TRUE
34.5797	4.74342	0.92457	5.13041	2.89113e-07	3.37106e-05	MTTP	protein_coding	ENSG00000138823	TRUE
93.8773	4.69292	0.603497	7.77621	7.47289e-15	7.93621e-12	ZMAT1	protein_coding	ENSG00000166432	TRUE
19.3938	4.57333	1.14372	3.99863	6.37113e-05	0.00283772	RHCE	protein_coding	ENSG00000188672	TRUE
13.1938	4.57292	1.36883	3.34075	0.000835514	0.0193702	CCL25	protein_coding	ENSG00000131142	TRUE
18.9099	4.18487	1.10268	3.79517	0.000147542	0.00538597	OSCAR	protein_coding	ENSG00000170909	TRUE
883.652	4.06955	0.387876	10.4919	9.41235e-26	9.32858e-22	ZC3H6	protein_coding	ENSG00000188177	TRUE
49.7888	3.76286	0.716353	5.25279	1.49809e-07	1.96656e-05	C11orf65	protein_coding	ENSG00000166323	TRUE
13.8841	3.58001	1.13734	3.14769	0.00164566	0.0313054	LIPJ	protein_coding	ENSG00000204022	TRUE
73.0773	3.4369	0.595591	5.77057	7.90019e-09	1.72085e-06	PPP1R36	protein_coding	ENSG00000165807	TRUE
84.0405	3.32789	0.533763	6.23477	4.52437e-10	1.54057e-07	MAP4K1	protein_coding	ENSG00000104814	TRUE
17.2774	3.28316	0.999043	3.2863	0.00101513	0.022308	HEATR4	protein_coding	ENSG00000187105	TRUE
16.3592	3.1931	1.01484	3.14641	0.0016529	0.031383	STPG2	protein_coding	ENSG00000163116	TRUE
125.607	3.14783	0.461926	6.81457	9.45475e-12	5.51212e-09	PJVK	protein_coding	ENSG00000204311	TRUE
19.0054	3.11063	0.958993	3.24364	0.00118013	0.0248592	RAD21L1	protein_coding	ENSG00000244588	TRUE
39.1237	3.08688	0.683793	4.51436	6.35086e-06	0.000452719	CLTRN	protein_coding	ENSG00000147003	TRUE
42.591	3.07249	0.679695	4.52039	6.17256e-06	0.000443306	LRRIQ3	protein_coding	ENSG00000162620	TRUE
101.133	2.93727	0.51555	5.69735	1.21683e-08	2.46123e-06	ANKRD31	protein_coding	ENSG00000145700	TRUE
156.063	2.93078	0.46758	6.26797	3.65788e-10	1.3183e-07	KLLN	protein_coding	ENSG00000227268	TRUE
20.4536	2.87523	0.895282	3.21153	0.00132029	0.0268694	RAD9B	protein_coding	ENSG00000151164	TRUE
55.5874	2.86472	0.585379	4.89379	9.891e-07	9.47147e-05	LMNTD2	protein_coding	ENSG00000185522	TRUE
18.883	2.78699	0.927261	3.00562	0.00265043	0.044439	PFKFB1	protein_coding	ENSG00000158571	TRUE
20.96	2.78245	0.922924	3.01482	0.00257132	0.0437198	SAMD13	protein_coding	ENSG00000203943	TRUE
67.7927	2.76915	0.619946	4.46676	7.94128e-06	0.000537242	CCT6B	protein_coding	ENSG00000132141	TRUE
31.4208	2.73126	0.724644	3.76911	0.000163833	0.00577848	ABCA4	protein_coding	ENSG00000198691	TRUE
48.0227	2.7236	0.625208	4.35631	1.32271e-05	0.000804256	MROH8	protein_coding	ENSG00000101353	TRUE
225.261	2.66152	0.378108	7.03904	1.93567e-12	1.32307e-09	ATP6V1E2	protein_coding	ENSG00000250565	TRUE
35.8363	2.6345	0.70594	3.7319	0.00019004	0.0064283	GGACT	protein_coding	ENSG00000134864	TRUE
83.3387	2.61873	0.533108	4.9122	9.00604e-07	8.83751e-05	FAM227B	protein_coding	ENSG00000166262	TRUE
116.239	2.58535	0.522753	4.94565	7.58897e-07	7.79422e-05	C5	protein_coding	ENSG00000106804	TRUE
1055.76	2.58241	0.306329	8.43017	3.45169e-17	8.55241e-14	PAN2	protein_coding	ENSG00000135473	TRUE
47.6036	2.53056	0.606645	4.1714	3.02731e-05	0.00157914	NT5M	protein_coding	ENSG00000205309	TRUE
61.2429	2.52986	0.550738	4.59358	4.35708e-06	0.000325909	GDF9	protein_coding	ENSG00000164404	TRUE
324.301	2.50445	0.379849	6.59328	4.30204e-11	2.36875e-08	PLA2G6	protein_coding	ENSG00000184381	TRUE
83.5842	2.50172	0.559762	4.46926	7.84922e-06	0.000534664	B3GNT10	protein_coding	ENSG00000214654	TRUE
24.143	2.46205	0.78935	3.11909	0.00181411	0.0335471	LYRM9	protein_coding	ENSG00000232859	TRUE
41.8244	2.44107	0.651174	3.74872	0.000177738	0.00613783	HSD17B6	protein_coding	ENSG00000025423	TRUE
79.7296	2.43962	0.541555	4.50485	6.64214e-06	0.000468543	CDCA7L	protein_coding	ENSG00000164649	TRUE
56.7612	2.39923	0.563318	4.2591	2.05249e-05	0.00114604	DMC1	protein_coding	ENSG00000100206	TRUE
183.916	2.38703	0.425147	5.61461	1.97009e-08	3.5501e-06	LEKR1	protein_coding	ENSG00000197980	TRUE
27.8741	2.38214	0.752917	3.16388	0.00155681	0.0300186	C16orf95	protein_coding	ENSG00000260456	TRUE
40.4768	2.36513	0.651935	3.62786	0.000285781	0.0087962	TSACC	protein_coding	ENSG00000163467	TRUE
50.6445	2.27798	0.594094	3.83437	0.000125886	0.00480616	BST1	protein_coding	ENSG00000109743	TRUE
134.006	2.27794	0.420663	5.41513	6.12445e-08	9.55896e-06	PIGV	protein_coding	ENSG00000060642	TRUE
259.815	2.2536	0.362042	6.2247	4.82471e-10	1.58944e-07	ZBED8	protein_coding	ENSG00000221886	TRUE
106.774	2.2519	0.469135	4.80012	1.58571e-06	0.000143939	PBLD	protein_coding	ENSG00000108187	TRUE
92.6035	2.24925	0.537221	4.18683	2.82873e-05	0.00149283	SENP8	protein_coding	ENSG00000166192	TRUE
111.806	2.24818	0.450857	4.98646	6.14945e-07	6.44944e-05	TAFA2	protein_coding	ENSG00000198673	TRUE
32.0435	2.20182	0.689827	3.19184	0.0014137	0.0281914	GVQW2	protein_coding	ENSG00000279968	TRUE
49.8326	2.19907	0.612467	3.59051	0.000330036	0.00977872	NUDT18	protein_coding	ENSG00000275074	TRUE
133.626	2.19726	0.490996	4.47511	7.63723e-06	0.000523824	ATG10	protein_coding	ENSG00000152348	TRUE
2202.42	2.18412	0.299565	7.29098	3.0771e-13	2.34594e-10	TRIM66	protein_coding	ENSG00000166436	TRUE
127.898	2.16165	0.432985	4.99245	5.96189e-07	6.31961e-05	LNP1	protein_coding	ENSG00000206535	TRUE
45.1697	2.15703	0.599563	3.59767	0.000321077	0.00958491	POLR3GL	protein_coding	ENSG00000121851	TRUE
134.557	2.15562	0.439226	4.90778	9.21128e-07	8.9503e-05	LPXN	protein_coding	ENSG00000110031	TRUE
54.8929	2.14441	0.557783	3.84453	0.000120784	0.00465793	ETFBKMT	protein_coding	ENSG00000139160	TRUE
226.881	2.13267	0.424119	5.02849	4.94368e-07	5.41401e-05	KRCC1	protein_coding	ENSG00000172086	TRUE
152.153	2.1269	0.420763	5.05486	4.30708e-07	4.79635e-05	LRRC20	protein_coding	ENSG00000172731	TRUE
122.241	2.12509	0.427776	4.96777	6.7727e-07	7.02872e-05	WDR31	protein_coding	ENSG00000148225	TRUE
532.119	2.12352	0.343477	6.18243	6.31234e-10	1.95505e-07	TKFC	protein_coding	ENSG00000149476	TRUE
440.274	2.10782	0.331664	6.35531	2.08007e-10	8.41452e-08	SIAE	protein_coding	ENSG00000110013	TRUE
220.808	2.10324	0.380727	5.52427	3.3086e-08	5.55789e-06	ENO3	protein_coding	ENSG00000108515	TRUE
98.5515	2.09916	0.456509	4.59828	4.2599e-06	0.000321064	FAM53A	protein_coding	ENSG00000174137	TRUE
85.7483	2.0981	0.505837	4.14778	3.35719e-05	0.0017188	RFESD	protein_coding	ENSG00000175449	TRUE
89.4518	2.09685	0.581063	3.60865	0.000307793	0.00925808	ACTA2	protein_coding	ENSG00000107796	TRUE
35.8699	2.09451	0.662295	3.1625	0.0015642	0.0301053	MYH7B	protein_coding	ENSG00000078814	TRUE
202.187	2.06745	0.464128	4.45448	8.40966e-06	0.000559383	SMIM19	protein_coding	ENSG00000176209	TRUE
496.574	2.03312	0.364727	5.57435	2.48458e-08	4.39726e-06	OMA1	protein_coding	ENSG00000162600	TRUE
344.197	2.02146	0.437382	4.62173	3.8055e-06	0.000290812	DZIP3	protein_coding	ENSG00000198919	TRUE
86.1456	2.01518	0.471764	4.27159	1.94087e-05	0.00109606	CARF	protein_coding	ENSG00000138380	TRUE
77.0686	1.99075	0.511057	3.89536	9.80539e-05	0.00395046	NUDT13	protein_coding	ENSG00000166321	TRUE
1224.38	1.98006	0.381107	5.19555	2.04112e-07	2.5287e-05	TBC1D5	protein_coding	ENSG00000131374	TRUE
114.456	1.97419	0.459173	4.29944	1.71232e-05	0.00100123	VEPH1	protein_coding	ENSG00000197415	TRUE
100.095	1.97238	0.494989	3.9847	6.75663e-05	0.00296305	C9orf43	protein_coding	ENSG00000157653	TRUE
42.2332	1.96584	0.664227	2.95958	0.00308056	0.0493636	MYOM1	protein_coding	ENSG00000101605	TRUE
108.719	1.96046	0.459118	4.27006	1.95424e-05	0.00110048	TMEM143	protein_coding	ENSG00000161558	TRUE
568.176	1.94362	0.38929	4.99273	5.95327e-07	6.31961e-05	C12orf66	protein_coding	ENSG00000174206	TRUE
313.924	1.93419	0.353913	5.46516	4.62486e-08	7.39306e-06	SLC24A1	protein_coding	ENSG00000074621	TRUE
40.7845	1.92355	0.615513	3.12511	0.00177738	0.0332057	APOM	protein_coding	ENSG00000204444	TRUE
129.777	1.91659	0.418981	4.57441	4.77575e-06	0.00035455	F8	protein_coding	ENSG00000185010	TRUE
291.717	1.90589	0.389048	4.89886	9.6395e-07	9.27545e-05	AKAP6	protein_coding	ENSG00000151320	TRUE
1027.33	1.89684	0.304338	6.23267	4.58549e-10	1.54057e-07	DARS2	protein_coding	ENSG00000117593	TRUE
59.3019	1.89587	0.547276	3.46419	0.000531827	0.0140558	TMEM187	protein_coding	ENSG00000177854	TRUE
95.4998	1.89439	0.544007	3.48228	0.00049716	0.0133714	PRRT1	protein_coding	ENSG00000204314	TRUE
217.73	1.8918	0.403166	4.69237	2.70063e-06	0.000220296	IQCH	protein_coding	ENSG00000103599	TRUE
73.769	1.8811	0.52043	3.61451	0.000300919	0.00910659	OAZ3	protein_coding	ENSG00000143450	TRUE
202.437	1.87875	0.398237	4.71767	2.38564e-06	0.000202086	L3MBTL3	protein_coding	ENSG00000198945	TRUE
538.351	1.87738	0.320145	5.86417	4.51378e-09	1.09112e-06	C19orf54	protein_coding	ENSG00000188493	TRUE
377.983	1.87454	0.349272	5.36699	8.0061e-08	1.21143e-05	FAM86C1	protein_coding	ENSG00000158483	TRUE
50.0109	1.87311	0.575891	3.25255	0.00114376	0.0242997	CBLN3	protein_coding	ENSG00000139899	TRUE
99.1082	1.85727	0.507319	3.66095	0.000251284	0.00803378	WDR78	protein_coding	ENSG00000152763	TRUE
104.481	1.83763	0.48585	3.7823	0.000155384	0.00555961	ZCWPW1	protein_coding	ENSG00000078487	TRUE
174.149	1.82731	0.416712	4.38506	1.15955e-05	0.000718899	DPH6	protein_coding	ENSG00000134146	TRUE
407.753	1.82221	0.424486	4.29273	1.76487e-05	0.00101696	ULK2	protein_coding	ENSG00000083290	TRUE
279.794	1.81209	0.367781	4.92711	8.34557e-07	8.35485e-05	PIGP	protein_coding	ENSG00000185808	TRUE
48.9829	1.80688	0.573013	3.1533	0.00161436	0.0309178	PXT1	protein_coding	ENSG00000179165	TRUE
92.4255	1.80086	0.469421	3.83635	0.000124876	0.00478509	KCTD18	protein_coding	ENSG00000155729	TRUE
130.334	1.79915	0.415639	4.32864	1.50032e-05	0.000898472	CENPH	protein_coding	ENSG00000153044	TRUE
67.4053	1.78032	0.512694	3.47249	0.000515662	0.0137201	GFI1	protein_coding	ENSG00000162676	TRUE
226.784	1.77682	0.367632	4.83315	1.34387e-06	0.000125652	PRIMPOL	protein_coding	ENSG00000164306	TRUE
131.99	1.75306	0.528312	3.31822	0.000905924	0.0204524	SPA17	protein_coding	ENSG00000064199	TRUE
460.522	1.75196	0.337507	5.19088	2.09303e-07	2.57689e-05	APOLD1	protein_coding	ENSG00000178878	TRUE
282.075	1.735	0.369516	4.69533	2.66173e-06	0.000218924	THAP9	protein_coding	ENSG00000168152	TRUE
484.057	1.72825	0.330506	5.2291	1.70341e-07	2.17839e-05	FGGY	protein_coding	ENSG00000172456	TRUE
53.537	1.72596	0.582818	2.96141	0.00306236	0.0491914	MST1	protein_coding	ENSG00000173531	TRUE
764.11	1.72175	0.448619	3.8379	0.000124093	0.00477624	HMMR	protein_coding	ENSG00000072571	TRUE
188.763	1.71542	0.407795	4.20657	2.59272e-05	0.00140418	NLRX1	protein_coding	ENSG00000160703	TRUE
143.237	1.70568	0.541238	3.15144	0.0016247	0.0309959	THNSL1	protein_coding	ENSG00000185875	TRUE
2178.33	1.70307	0.420972	4.04558	5.21947e-05	0.00243555	GLP2R	protein_coding	ENSG00000065325	TRUE
180.798	1.69079	0.404464	4.18033	2.91081e-05	0.00152641	METAP1D	protein_coding	ENSG00000172878	TRUE
82.4249	1.69015	0.505177	3.34567	0.00082085	0.0190973	PCYOX1L	protein_coding	ENSG00000145882	TRUE
89.2727	1.68603	0.4611	3.65653	0.000255655	0.00812236	ELAC1	protein_coding	ENSG00000141642	TRUE
234.8	1.68138	0.371176	4.52988	5.90175e-06	0.000425398	IPP	protein_coding	ENSG00000197429	TRUE
68.7051	1.6765	0.509681	3.28932	0.00100429	0.0220943	EPDR1	protein_coding	ENSG00000086289	TRUE
274.329	1.67268	0.376169	4.44661	8.72367e-06	0.000574487	CYP4V2	protein_coding	ENSG00000145476	TRUE
187.034	1.66504	0.38764	4.29534	1.74424e-05	0.00101391	CCDC7	protein_coding	ENSG00000216937	TRUE
460.857	1.6595	0.344713	4.81415	1.47825e-06	0.000136288	ERLIN2	protein_coding	ENSG00000147475	TRUE
173.014	1.65637	0.418184	3.96086	7.46796e-05	0.00318344	APC2	protein_coding	ENSG00000115266	TRUE
883.172	1.65198	0.324076	5.09752	3.44138e-07	3.898e-05	USP40	protein_coding	ENSG00000085982	TRUE
341.341	1.64411	0.353521	4.65066	3.30871e-06	0.000260259	RAD50	protein_coding	ENSG00000113522	TRUE
96.4435	1.64051	0.457216	3.58805	0.000333164	0.00985667	BANK1	protein_coding	ENSG00000153064	TRUE
210.817	1.63677	0.380042	4.30682	1.65615e-05	0.00097413	TXNRD3	protein_coding	ENSG00000197763	TRUE
86.9722	1.6341	0.486456	3.35919	0.000781715	0.0184893	CGA	protein_coding	ENSG00000135346	TRUE
65.091	1.6273	0.536911	3.03085	0.00243864	0.0419758	CLYBL	protein_coding	ENSG00000125246	TRUE
155.001	1.62621	0.394749	4.1196	3.79531e-05	0.00189022	ZNF311	protein_coding	ENSG00000197935	TRUE
166.715	1.61562	0.419512	3.85118	0.000117549	0.00457664	PTGR2	protein_coding	ENSG00000140043	TRUE
110.426	1.60897	0.455825	3.5298	0.000415872	0.0115778	NGEF	protein_coding	ENSG00000066248	TRUE
276.838	1.59864	0.351179	4.55221	5.30849e-06	0.000388283	THNSL2	protein_coding	ENSG00000144115	TRUE
488.445	1.58822	0.333093	4.7681	1.85971e-06	0.00016168	RHOBTB1	protein_coding	ENSG00000072422	TRUE
89.8764	1.58479	0.494749	3.20322	0.00135901	0.0274041	ADTRP	protein_coding	ENSG00000111863	TRUE
442.243	1.57634	0.350377	4.49899	6.82766e-06	0.000478226	PDE5A	protein_coding	ENSG00000138735	TRUE
532.284	1.573	0.332579	4.7297	2.24848e-06	0.000191284	H6PD	protein_coding	ENSG00000049239	TRUE
315.79	1.56831	0.456696	3.43404	0.000594659	0.0152291	KAZALD1	protein_coding	ENSG00000107821	TRUE
507.346	1.56586	0.368952	4.24408	2.19496e-05	0.00121194	UVSSA	protein_coding	ENSG00000163945	TRUE
82.1437	1.55954	0.478048	3.26232	0.00110506	0.0237834	HARBI1	protein_coding	ENSG00000180423	TRUE
115.576	1.55685	0.425075	3.66252	0.000249745	0.00800127	B3GNTL1	protein_coding	ENSG00000175711	TRUE
237.292	1.55523	0.407999	3.81185	0.000137933	0.00511049	ADAMTS6	protein_coding	ENSG00000049192	TRUE
463.186	1.53768	0.337687	4.55355	5.2748e-06	0.000387249	RRNAD1	protein_coding	ENSG00000143303	TRUE
85.7414	1.53312	0.482588	3.17687	0.00148875	0.0292179	EPHA5	protein_coding	ENSG00000145242	TRUE
300.242	1.53001	0.347458	4.40343	1.06553e-05	0.000677551	REXO5	protein_coding	ENSG00000005189	TRUE
386.759	1.52907	0.400366	3.81918	0.000133898	0.00498895	OARD1	protein_coding	ENSG00000124596	TRUE
2081.6	1.52901	0.385054	3.97091	7.15996e-05	0.00307196	MFAP5	protein_coding	ENSG00000197614	TRUE
200.087	1.52859	0.38799	3.93978	8.1558e-05	0.00342509	WDYHV1	protein_coding	ENSG00000156795	TRUE
239.964	1.52745	0.398425	3.83373	0.000126216	0.00480616	MSH5	protein_coding	ENSG00000204410	TRUE
857.613	1.52577	0.364176	4.18967	2.79362e-05	0.00148459	FAM114A1	protein_coding	ENSG00000197712	TRUE
683.112	1.5215	0.327083	4.65172	3.2917e-06	0.000259953	INTS2	protein_coding	ENSG00000108506	TRUE
490.6	1.50178	0.393124	3.82011	0.000133392	0.00498887	AP4M1	protein_coding	ENSG00000221838	TRUE
73.5861	1.49508	0.497341	3.00615	0.00264575	0.0444065	LCA5L	protein_coding	ENSG00000157578	TRUE
640.041	1.49373	0.339233	4.40324	1.06647e-05	0.000677551	FAM120C	protein_coding	ENSG00000184083	TRUE
462.051	1.49276	0.334394	4.46408	8.04123e-06	0.000540316	GANC	protein_coding	ENSG00000214013	TRUE
166.449	1.48787	0.394575	3.77083	0.000162704	0.00577848	ADAMTS13	protein_coding	ENSG00000160323	TRUE
522.675	1.48315	0.385195	3.85038	0.000117933	0.00457664	PAAF1	protein_coding	ENSG00000175575	TRUE
136.512	1.48278	0.406608	3.64672	0.000265614	0.00829135	TRIQK	protein_coding	ENSG00000205133	TRUE
253.623	1.47704	0.385464	3.83185	0.000127185	0.00482039	PRIM1	protein_coding	ENSG00000198056	TRUE
97.8672	1.46909	0.451674	3.25255	0.00114373	0.0242997	PGAP4	protein_coding	ENSG00000165152	TRUE
119.681	1.46721	0.432265	3.39423	0.000688219	0.0169044	C5orf63	protein_coding	ENSG00000164241	TRUE
213.91	1.4592	0.443596	3.28947	0.00100375	0.0220943	ELOVL2	protein_coding	ENSG00000197977	TRUE
255.831	1.45877	0.477262	3.05654	0.00223907	0.0390694	WTIP	protein_coding	ENSG00000142279	TRUE
142.586	1.45651	0.416443	3.49749	0.000469663	0.0127358	PRDM5	protein_coding	ENSG00000138738	TRUE
213.875	1.45552	0.384647	3.78403	0.000154308	0.00554111	HIRIP3	protein_coding	ENSG00000149929	TRUE
101.534	1.45132	0.440176	3.29713	0.000976776	0.0216796	ZNF624	protein_coding	ENSG00000197566	TRUE
97.4396	1.44727	0.448522	3.22675	0.00125203	0.0259599	PRR5L	protein_coding	ENSG00000135362	TRUE
107.402	1.44133	0.437584	3.29383	0.000988312	0.0218642	GLB1L	protein_coding	ENSG00000163521	TRUE
503.139	1.43956	0.355411	4.05042	5.11265e-05	0.00239729	ADAMTS1	protein_coding	ENSG00000154734	TRUE
276.541	1.43506	0.351043	4.088	4.35112e-05	0.00210678	FAM149B1	protein_coding	ENSG00000138286	TRUE
715.592	1.41723	0.407105	3.48124	0.000499097	0.0134053	HSPBAP1	protein_coding	ENSG00000169087	TRUE
603.053	1.41286	0.313019	4.51365	6.37214e-06	0.000452719	CEP63	protein_coding	ENSG00000182923	TRUE
216.254	1.40451	0.410901	3.41811	0.00063057	0.0158479	RAD52	protein_coding	ENSG00000002016	TRUE
527.188	1.40264	0.357209	3.92666	8.61351e-05	0.00359446	ERMARD	protein_coding	ENSG00000130023	TRUE
107.965	1.3933	0.432191	3.2238	0.001265	0.0260925	DET1	protein_coding	ENSG00000140543	TRUE
294.537	1.39204	0.355732	3.91316	9.10946e-05	0.00373074	AFG1L	protein_coding	ENSG00000135537	TRUE
284.07	1.37758	0.381007	3.61563	0.000299614	0.00908095	STX1B	protein_coding	ENSG00000099365	TRUE
155.359	1.37012	0.396737	3.45348	0.000553398	0.0144716	ZNF18	protein_coding	ENSG00000154957	TRUE
135.491	1.36319	0.445264	3.06154	0.00220201	0.0385244	ACYP2	protein_coding	ENSG00000170634	TRUE
1024.02	1.36117	0.382132	3.56204	0.000367988	0.0106021	IGSF10	protein_coding	ENSG00000152580	TRUE
286.894	1.35608	0.414154	3.27433	0.00105914	0.0229447	ANO2	protein_coding	ENSG00000047617	TRUE
465.487	1.34652	0.333546	4.03697	5.41452e-05	0.00249597	LTBP1	protein_coding	ENSG00000049323	TRUE
448.11	1.34474	0.329061	4.0866	4.37734e-05	0.00211114	NFYB	protein_coding	ENSG00000120837	TRUE
193.593	1.34333	0.389208	3.45145	0.000557583	0.0145045	C11orf71	protein_coding	ENSG00000180425	TRUE
981.704	1.34069	0.333333	4.02208	5.76861e-05	0.0026166	ETAA1	protein_coding	ENSG00000143971	TRUE
470.481	1.3404	0.349721	3.83278	0.000126704	0.00481135	ZRANB3	protein_coding	ENSG00000121988	TRUE
261.007	1.32932	0.370076	3.59201	0.000328136	0.00973698	PMVK	protein_coding	ENSG00000163344	TRUE
346.21	1.32911	0.372237	3.57059	0.000356174	0.0103517	GSAP	protein_coding	ENSG00000186088	TRUE
438.529	1.32855	0.336673	3.94611	7.94301e-05	0.00334992	IMPACT	protein_coding	ENSG00000154059	TRUE
1890.43	1.31811	0.346783	3.80097	0.000144132	0.00529073	COBLL1	protein_coding	ENSG00000082438	TRUE
239.998	1.31166	0.366527	3.57861	0.000345429	0.0101328	SUPT3H	protein_coding	ENSG00000196284	TRUE
278.283	1.3048	0.421814	3.0933	0.00197946	0.0356242	PI4K2B	protein_coding	ENSG00000038210	TRUE
907.239	1.30357	0.346478	3.76236	0.000168315	0.00590192	SRBD1	protein_coding	ENSG00000068784	TRUE
260.833	1.30334	0.376048	3.46589	0.00052848	0.013986	LACTB2	protein_coding	ENSG00000147592	TRUE
923.734	1.29978	0.311218	4.17644	2.96108e-05	0.00154867	CPT2	protein_coding	ENSG00000157184	TRUE
281.277	1.28755	0.423296	3.04173	0.00235225	0.0407217	KCNH5	protein_coding	ENSG00000140015	TRUE
407.822	1.28298	0.32688	3.92493	8.67542e-05	0.00361269	NUDCD2	protein_coding	ENSG00000170584	TRUE
256.09	1.28139	0.36025	3.55694	0.000375197	0.0107629	RNF170	protein_coding	ENSG00000120925	TRUE
283.621	1.27815	0.347771	3.67526	0.000237609	0.00770756	HSD17B7	protein_coding	ENSG00000132196	TRUE
511.029	1.27457	0.4281	2.97726	0.00290835	0.0475329	ARSG	protein_coding	ENSG00000141337	TRUE
475.036	1.2714	0.335248	3.79242	0.000149189	0.00541397	CUL7	protein_coding	ENSG00000044090	TRUE
308.205	1.25636	0.348815	3.60178	0.000316042	0.00944884	GEMIN8	protein_coding	ENSG00000046647	TRUE
658.816	1.25272	0.326567	3.83601	0.000125047	0.00478509	HLCS	protein_coding	ENSG00000159267	TRUE
155.818	1.25108	0.395383	3.16422	0.00155497	0.0300123	RNF135	protein_coding	ENSG00000181481	TRUE
386.607	1.24601	0.374813	3.32436	0.000886228	0.0200993	PTK2B	protein_coding	ENSG00000120899	TRUE
542.855	1.24267	0.379607	3.27357	0.00106199	0.0229812	ACAD10	protein_coding	ENSG00000111271	TRUE
217.931	1.24119	0.391567	3.16979	0.0015255	0.0296746	C1orf21	protein_coding	ENSG00000116667	TRUE
438.171	1.23838	0.350028	3.53796	0.000403233	0.0113374	BORCS5	protein_coding	ENSG00000165714	TRUE
578.003	1.23084	0.324985	3.78737	0.000152249	0.00548705	ALG10B	protein_coding	ENSG00000175548	TRUE
181.754	1.22884	0.377035	3.25922	0.00111719	0.0239147	TMEM42	protein_coding	ENSG00000169964	TRUE
291.479	1.22065	0.368096	3.31612	0.000912772	0.0205136	PTPRQ	protein_coding	ENSG00000139304	TRUE
494.724	1.21836	0.365111	3.33697	0.000846981	0.0195446	HEMK1	protein_coding	ENSG00000114735	TRUE
889.697	1.21459	0.329712	3.6838	0.00022978	0.007516	ATPSCKMT	protein_coding	ENSG00000150756	TRUE
321.366	1.21176	0.353113	3.43164	0.000599943	0.0153051	TRMT1L	protein_coding	ENSG00000121486	TRUE
151.805	1.20741	0.399963	3.0188	0.00253776	0.0432904	S100A2	protein_coding	ENSG00000196754	TRUE
1112.13	1.20531	0.356385	3.38203	0.000719514	0.0174335	KLF7	protein_coding	ENSG00000118263	TRUE
401.233	1.20067	0.351462	3.41621	0.000635	0.0159329	NUDT12	protein_coding	ENSG00000112874	TRUE
226.657	1.17753	0.372376	3.16219	0.00156587	0.0301053	TRMT9B	protein_coding	ENSG00000250305	TRUE
353.94	1.17429	0.366964	3.20002	0.00137419	0.027598	GSTZ1	protein_coding	ENSG00000100577	TRUE
353.273	1.17346	0.355511	3.30077	0.00096421	0.0214521	ALG10	protein_coding	ENSG00000139133	TRUE
280.334	1.16563	0.353561	3.29684	0.000977783	0.0216796	CTBS	protein_coding	ENSG00000117151	TRUE
250.707	1.16518	0.357918	3.25545	0.00113213	0.0241562	CMC1	protein_coding	ENSG00000187118	TRUE
1657.07	1.16474	0.297687	3.91264	9.12917e-05	0.0037311	CDC7	protein_coding	ENSG00000097046	TRUE
220.574	1.15691	0.386448	2.99369	0.00275626	0.0456429	BTBD8	protein_coding	ENSG00000189195	TRUE
298.02	1.15264	0.357513	3.22405	0.00126393	0.0260925	MYORG	protein_coding	ENSG00000164976	TRUE
571.043	1.14164	0.369089	3.09314	0.00198052	0.0356242	KLHL12	protein_coding	ENSG00000117153	TRUE
651.475	1.1357	0.322164	3.52524	0.000423106	0.0117298	UFL1	protein_coding	ENSG00000014123	TRUE
554.604	1.13384	0.317074	3.57593	0.00034898	0.0102028	RFX3	protein_coding	ENSG00000080298	TRUE
464.387	1.11488	0.327323	3.40605	0.000659103	0.016413	MUC1	protein_coding	ENSG00000185499	TRUE
346.588	1.1126	0.367014	3.03149	0.00243352	0.0419454	KLHL13	protein_coding	ENSG00000003096	TRUE
464.159	1.11209	0.370028	3.00542	0.00265217	0.044439	PTCD2	protein_coding	ENSG00000049883	TRUE
431.042	1.1088	0.340381	3.25752	0.00112392	0.0240327	SLC2A13	protein_coding	ENSG00000151229	TRUE
1086.08	1.10835	0.334139	3.31704	0.000909777	0.0204932	SEC24D	protein_coding	ENSG00000150961	TRUE
650.217	1.10314	0.357742	3.0836	0.00204509	0.0364548	FNIP2	protein_coding	ENSG00000052795	TRUE
497.73	1.0955	0.35375	3.09683	0.00195601	0.0353759	ENTPD5	protein_coding	ENSG00000187097	TRUE
755.691	1.08404	0.322463	3.36176	0.000774484	0.0183529	NEMP1	protein_coding	ENSG00000166881	TRUE
674.291	1.07425	0.346374	3.10142	0.00192597	0.0350566	ZBTB25	protein_coding	ENSG00000089775	TRUE
669.327	1.07414	0.328717	3.26769	0.0010843	0.0233874	TIMMDC1	protein_coding	ENSG00000113845	TRUE
548.636	1.07042	0.324264	3.30107	0.00096316	0.0214521	RMDN1	protein_coding	ENSG00000176623	TRUE
872.597	1.06771	0.306102	3.48807	0.000486513	0.0131206	FKBP9	protein_coding	ENSG00000122642	TRUE
777.831	1.05914	0.315849	3.35332	0.000798496	0.0187533	ZNF397	protein_coding	ENSG00000186812	TRUE
562.461	1.05625	0.3418	3.09024	0.00199992	0.0358174	SIL1	protein_coding	ENSG00000120725	TRUE
575.801	1.05029	0.328151	3.20063	0.00137129	0.0275676	NLN	protein_coding	ENSG00000123213	TRUE
420.005	1.04625	0.330838	3.16244	0.00156454	0.0301053	ANGEL1	protein_coding	ENSG00000013523	TRUE
295.351	1.04579	0.349164	2.99513	0.00274328	0.045504	SETDB2	protein_coding	ENSG00000136169	TRUE
384.66	1.02738	0.339803	3.02346	0.00249903	0.0427406	ZNF766	protein_coding	ENSG00000196214	TRUE
703.835	1.02412	0.34409	2.97631	0.00291736	0.0475559	TDRD3	protein_coding	ENSG00000083544	TRUE
299.112	1.01609	0.342957	2.96272	0.00304929	0.0490609	GOLGA5	protein_coding	ENSG00000066455	TRUE
354.464	1.01159	0.339959	2.97564	0.00292381	0.0475827	ZCRB1	protein_coding	ENSG00000139168	TRUE
1788.59	1.01021	0.296077	3.41198	0.00064494	0.0161618	SMC6	protein_coding	ENSG00000163029	TRUE
1038.59	1.00987	0.303581	3.32652	0.00087937	0.020027	PARN	protein_coding	ENSG00000140694	TRUE
758.002	1.00812	0.317757	3.1726	0.0015108	0.029462	BCL2L13	protein_coding	ENSG00000099968	TRUE
769.245	1.00635	0.317071	3.17389	0.00150413	0.0294032	SLC38A10	protein_coding	ENSG00000157637	TRUE
20.2423	7.68142	1.64238	4.67701	2.91095e-06	0.000233606	SPAG6	protein_coding	ENSG00000077327	FALSE
15.1281	5.83156	1.82083	3.20269	0.0013615	0.0274219	BOLA2B	protein_coding	ENSG00000169627	FALSE
53.1764	5.30279	0.865868	6.12425	9.11123e-10	2.61743e-07	INHBC	protein_coding	ENSG00000175189	FALSE
43.0287	4.11975	0.743283	5.54264	2.97944e-08	5.07338e-06	QPCT	protein_coding	ENSG00000115828	FALSE
63.1967	3.71438	0.655796	5.66393	1.47942e-08	2.89012e-06	EDNRA	protein_coding	ENSG00000151617	FALSE
14.5612	3.49707	1.18152	2.9598	0.00307835	0.0493636	STEAP4	protein_coding	ENSG00000127954	FALSE
42.7667	3.42791	0.794088	4.31679	1.58313e-05	0.000939545	CLDN6	protein_coding	ENSG00000184697	FALSE
94.463	2.9986	0.56204	5.33521	9.54331e-08	1.4117e-05	ADPRHL1	protein_coding	ENSG00000153531	FALSE
52.0526	2.97838	0.60572	4.91708	8.78427e-07	8.66278e-05	GRIK5	protein_coding	ENSG00000105737	FALSE
17.869	2.81849	0.946716	2.97712	0.00290968	0.0475329	GLIPR1L2	protein_coding	ENSG00000180481	FALSE
24.381	2.74415	0.808131	3.39567	0.000684611	0.0168367	FAM186B	protein_coding	ENSG00000135436	FALSE
378.633	2.70933	0.396622	6.831	8.43222e-12	5.06495e-09	SYNPO2	protein_coding	ENSG00000172403	FALSE
57.5797	2.67157	0.570625	4.68184	2.84307e-06	0.000229087	NT5DC3	protein_coding	ENSG00000111696	FALSE
47.0686	2.63739	0.765289	3.44627	0.000568381	0.0146552	DNAJB13	protein_coding	ENSG00000187726	FALSE
40.1226	2.59279	0.653474	3.96771	7.25679e-05	0.00310678	INCA1	protein_coding	ENSG00000196388	FALSE
194.549	2.52654	0.389371	6.48876	8.6548e-11	3.98966e-08	CYB5D2	protein_coding	ENSG00000167740	FALSE
33.4278	2.52356	0.691088	3.65157	0.000260637	0.00821359	SYTL3	protein_coding	ENSG00000164674	FALSE
25.8969	2.41652	0.772289	3.12904	0.00175381	0.0328583	TENM2	protein_coding	ENSG00000145934	FALSE
80.8361	2.41485	0.503141	4.79954	1.59028e-06	0.000143939	GSTO2	protein_coding	ENSG00000065621	FALSE
33.9237	2.39898	0.694523	3.45414	0.00055206	0.0144557	PHYHIP	protein_coding	ENSG00000168490	FALSE
61.8353	2.22643	0.551326	4.03832	5.38346e-05	0.00248743	AK7	protein_coding	ENSG00000140057	FALSE
36.4342	2.20535	0.684688	3.22095	0.00127766	0.0262988	MX1	protein_coding	ENSG00000157601	FALSE
233.765	2.20501	0.390202	5.65095	1.59566e-08	3.00913e-06	KLHL3	protein_coding	ENSG00000146021	FALSE
69.8005	2.20097	0.555544	3.96183	7.43787e-05	0.00317745	PADI1	protein_coding	ENSG00000142623	FALSE
229.371	2.01898	0.371107	5.44043	5.31522e-08	8.42867e-06	WNT3	protein_coding	ENSG00000108379	FALSE
44.553	2.01263	0.648403	3.10398	0.00190933	0.0349443	ELFN1	protein_coding	ENSG00000225968	FALSE
79.3241	1.84946	0.619216	2.98678	0.00281932	0.0464543	IQCN	protein_coding	ENSG00000130518	FALSE
80.6797	1.83586	0.516955	3.5513	0.000383333	0.010886	MAP3K7CL	protein_coding	ENSG00000156265	FALSE
105.553	1.81667	0.439848	4.13023	3.62399e-05	0.00182369	CAPN3	protein_coding	ENSG00000092529	FALSE
76.202	1.75488	0.517842	3.38883	0.000701916	0.0171558	LAMA2	protein_coding	ENSG00000196569	FALSE
83.814	1.72022	0.476198	3.61241	0.000303365	0.00915265	EYS	protein_coding	ENSG00000188107	FALSE
216.556	1.65151	0.411214	4.01618	5.9148e-05	0.00266462	NEK8	protein_coding	ENSG00000160602	FALSE
194.568	1.6195	0.379415	4.2684	1.96881e-05	0.00110554	FBXO4	protein_coding	ENSG00000151876	FALSE
77.921	1.59682	0.513493	3.10971	0.00187271	0.0344029	ZKSCAN3	protein_coding	ENSG00000189298	FALSE
83.1918	1.58146	0.472216	3.34902	0.00081098	0.0189343	PYROXD2	protein_coding	ENSG00000119943	FALSE
405.035	1.50848	0.434	3.47577	0.000509394	0.0136081	POU5F2	protein_coding	ENSG00000248483	FALSE
288.432	1.46076	0.347387	4.20499	2.61095e-05	0.0014102	KATNAL2	protein_coding	ENSG00000167216	FALSE
149.049	1.43634	0.428816	3.34956	0.000809398	0.0189262	CFAP70	protein_coding	ENSG00000156042	FALSE
163.973	1.3625	0.392041	3.4754	0.000510096	0.0136085	FBF1	protein_coding	ENSG00000188878	FALSE
151.286	1.34634	0.439381	3.06417	0.00218272	0.0382546	SPOCK2	protein_coding	ENSG00000107742	FALSE
137.542	1.3015	0.432157	3.01164	0.00259839	0.043984	FAM174B	protein_coding	ENSG00000185442	FALSE
129.392	1.27285	0.420366	3.02796	0.00246214	0.0422916	CREB3L4	protein_coding	ENSG00000143578	FALSE
152.421	1.23966	0.406766	3.04759	0.00230687	0.040076	LRRC37A3	protein_coding	ENSG00000176809	FALSE
176.339	1.21458	0.383493	3.16716	0.00153937	0.0298274	PCSK1	protein_coding	ENSG00000175426	FALSE
484.918	1.21366	0.34636	3.50403	0.000458269	0.0124949	RCCD1	protein_coding	ENSG00000166965	FALSE
478.815	1.18868	0.342088	3.47477	0.000511287	0.013622	SOX6	protein_coding	ENSG00000110693	FALSE
349.606	1.06236	0.333129	3.18904	0.00142746	0.0284087	CRB1	protein_coding	ENSG00000134376	FALSE
580.472	1.00425	0.315455	3.18351	0.00145503	0.0287267	PRDM6	protein_coding	ENSG00000061455	FALSE
18.888	3.79829	1.03359	3.67487	0.000237969	0.00770756	AC024558.2	protein_coding	ENSG00000288436

## Sheet: upregulated_ints11
baseMean	log2FoldChange	lfcSE	stat	pvalue	padj	gene_name	gene_biotype	gene_id	Manual Curration Result
13.9165	7.25741	1.79463	4.04395	5.2557e-05	0.00571993	IGFBP5	protein_coding	ENSG00000115461	TRUE
10.4645	6.83886	1.90622	3.58765	0.00033367	0.0219415	UGT3A1	protein_coding	ENSG00000145626	TRUE
18.9343	6.24664	1.70238	3.66936	0.000243154	0.0177451	DSG1	protein_coding	ENSG00000134760	TRUE
63.2437	5.16747	0.840894	6.14521	7.98586e-10	9.23846e-07	PLEKHS1	protein_coding	ENSG00000148735	TRUE
63.7165	5.12914	0.894138	5.7364	9.67099e-09	6.2932e-06	GABRA1	protein_coding	ENSG00000022355	TRUE
29.9855	3.88542	1.05014	3.6999	0.000215681	0.0162724	CHRM1	protein_coding	ENSG00000168539	TRUE
19.633	3.61861	1.05938	3.41579	0.000635966	0.0356632	TSPAN33	protein_coding	ENSG00000158457	TRUE
28.1149	3.5695	0.943552	3.78305	0.00015492	0.0127341	VCAN	protein_coding	ENSG00000038427	TRUE
78.3531	3.3806	0.789222	4.28346	1.84012e-05	0.00258901	GRK7	protein_coding	ENSG00000114124	TRUE
55.4536	3.37868	0.9067	3.72635	0.000194273	0.0150948	PTCHD4	protein_coding	ENSG00000244694	TRUE
93.5294	3.27152	0.793053	4.12522	3.70383e-05	0.00442548	NYNRIN	protein_coding	ENSG00000205978	TRUE
59.272	3.22966	0.695557	4.64327	3.42937e-06	0.000728683	FAM78B	protein_coding	ENSG00000188859	TRUE
140.196	3.16982	0.60609	5.22995	1.69555e-07	6.71046e-05	INPP5D	protein_coding	ENSG00000168918	TRUE
98.802	3.14776	0.644196	4.88634	1.02727e-06	0.000291697	GRHL2	protein_coding	ENSG00000083307	TRUE
94.5207	2.9918	0.655444	4.56454	5.00591e-06	0.000971178	TFEC	protein_coding	ENSG00000105967	TRUE
54.6675	2.98637	0.708954	4.21236	2.52711e-05	0.00320871	ACVRL1	protein_coding	ENSG00000139567	TRUE
79.2128	2.87386	0.633645	4.53544	5.74824e-06	0.00110151	CRYAB	protein_coding	ENSG00000109846	TRUE
300.981	2.50983	0.547863	4.58113	4.62466e-06	0.000920072	LAMA4	protein_coding	ENSG00000112769	TRUE
112.695	2.46876	0.617174	4.0001	6.33159e-05	0.00659589	CCL28	protein_coding	ENSG00000151882	TRUE
4021.74	2.45531	0.62529	3.92668	8.61257e-05	0.00840667	CCDC80	protein_coding	ENSG00000091986	TRUE
93.8249	2.44939	0.629363	3.89187	9.94765e-05	0.00930284	INSYN1	protein_coding	ENSG00000205363	TRUE
320.714	2.44553	0.516901	4.73114	2.23268e-06	0.000509035	LAMA2	protein_coding	ENSG00000196569	TRUE
139.878	2.4264	0.707733	3.42841	0.000607129	0.0345422	ART5	protein_coding	ENSG00000167311	TRUE
462.281	2.41278	0.558193	4.32249	1.5428e-05	0.00224136	UNC5B	protein_coding	ENSG00000107731	TRUE
232.411	2.35133	0.591681	3.97399	7.06791e-05	0.00726205	CREB3L1	protein_coding	ENSG00000157613	TRUE
486.012	2.34711	0.554282	4.23451	2.29048e-05	0.00298097	COL11A2	protein_coding	ENSG00000204248	TRUE
224.65	2.31949	0.554461	4.18332	2.87281e-05	0.00356081	ASZ1	protein_coding	ENSG00000154438	TRUE
99.361	2.31696	0.590874	3.92125	8.80914e-05	0.00854514	ARRDC4	protein_coding	ENSG00000140450	TRUE
63.802	2.29797	0.682205	3.36845	0.000755926	0.0407092	TNFSF15	protein_coding	ENSG00000181634	TRUE
82.2555	2.25376	0.601809	3.74498	0.00018041	0.0143177	EIF4E3	protein_coding	ENSG00000163412	TRUE
2098.45	2.24794	0.508711	4.41888	9.92115e-06	0.00164743	GDF15	protein_coding	ENSG00000130513	TRUE
148.22	2.23794	0.539034	4.15175	3.29938e-05	0.00404142	LMAN1L	protein_coding	ENSG00000140506	TRUE
1194.07	2.18388	0.498006	4.38526	1.15849e-05	0.00180927	TSC22D3	protein_coding	ENSG00000157514	TRUE
231.493	2.14271	0.505306	4.24042	2.23097e-05	0.00291831	SNPH	protein_coding	ENSG00000101298	TRUE
296.627	2.12655	0.523812	4.05976	4.91234e-05	0.0054799	KCNIP3	protein_coding	ENSG00000115041	TRUE
166.165	2.11392	0.52195	4.05005	5.12075e-05	0.00563193	NIPAL2	protein_coding	ENSG00000104361	TRUE
199.928	2.09881	0.538894	3.89467	9.83342e-05	0.00927936	ST6GALNAC1	protein_coding	ENSG00000070526	TRUE
451.464	2.06791	0.525279	3.93679	8.25775e-05	0.00826702	FBXO32	protein_coding	ENSG00000156804	TRUE
148.095	2.0616	0.538275	3.83001	0.000128136	0.0111451	KCNJ15	protein_coding	ENSG00000157551	TRUE
203.701	2.03678	0.50552	4.02907	5.59986e-05	0.00602103	GALNTL6	protein_coding	ENSG00000174473	TRUE
193.15	1.96611	0.539375	3.64517	0.000267219	0.0185893	ALDH3A1	protein_coding	ENSG00000108602	TRUE
186.524	1.95623	0.531001	3.68404	0.000229568	0.0170322	KRT15	protein_coding	ENSG00000171346	TRUE
1833.27	1.92557	0.458553	4.19924	2.6781e-05	0.00335946	KCNK12	protein_coding	ENSG00000184261	TRUE
1049.49	1.92464	0.474397	4.05703	4.97005e-05	0.00552454	BTG2	protein_coding	ENSG00000159388	TRUE
718.693	1.80726	0.47375	3.8148	0.000136291	0.0115996	TCP11L2	protein_coding	ENSG00000166046	TRUE
179.128	1.77841	0.528686	3.36383	0.000768684	0.041325	IGSF9B	protein_coding	ENSG00000080854	TRUE
674.363	1.76981	0.524857	3.37198	0.000746285	0.0403291	KLLN	protein_coding	ENSG00000227268	TRUE
1424.47	1.76052	0.494885	3.55744	0.000374485	0.024068	COL25A1	protein_coding	ENSG00000188517	TRUE
666.488	1.66687	0.467111	3.56846	0.000359084	0.0232697	NKD2	protein_coding	ENSG00000145506	TRUE
543.312	1.65202	0.493	3.35096	0.000805325	0.0428502	CREB5	protein_coding	ENSG00000146592	TRUE
1134.39	1.50724	0.446363	3.3767	0.000733606	0.0397816	KDM7A	protein_coding	ENSG00000006459	TRUE
54.8558	9.24575	1.62435	5.69195	1.25595e-08	7.54414e-06	VCAM1	protein_coding	ENSG00000162692	FALSE
19.053	7.72457	1.76754	4.37025	1.24107e-05	0.00190023	GHRHR	protein_coding	ENSG00000106128	FALSE
37.7362	7.24818	1.61558	4.48643	7.24265e-06	0.00132295	PNMA2	protein_coding	ENSG00000240694	FALSE
32.9967	7.04981	1.61389	4.3682	1.25276e-05	0.00190878	OR1D2	protein_coding	ENSG00000184166	FALSE
11.1832	6.95717	1.89499	3.67135	0.000241274	0.0176492	ZPBP	protein_coding	ENSG00000042813	FALSE
10.6976	6.88387	1.86919	3.6828	0.000230683	0.0170744	CNTFR	protein_coding	ENSG00000122756	FALSE
10.4325	6.84564	1.87614	3.6488	0.000263469	0.0183693	CACNA2D1	protein_coding	ENSG00000153956	FALSE
20.3608	6.35252	1.73811	3.65485	0.000257333	0.0181851	ANKRD66	protein_coding	ENSG00000230062	FALSE
17.3123	6.11509	1.72208	3.55098	0.000383799	0.0244652	ST8SIA6	protein_coding	ENSG00000148488	FALSE
35.0412	6.11437	1.4104	4.3352	1.4563e-05	0.00214365	SIGLEC9	protein_coding	ENSG00000129450	FALSE
15.9056	5.98669	1.74206	3.43657	0.000589137	0.0337027	RDM1	protein_coding	ENSG00000278023	FALSE
39.8116	5.74949	1.1207	5.13028	2.89316e-07	9.93055e-05	CABP1	protein_coding	ENSG00000157782	FALSE
75.8809	5.63476	0.866811	6.50056	8.0023e-11	1.13614e-07	NPC1L1	protein_coding	ENSG00000015520	FALSE
24.5336	5.60828	1.3125	4.27299	1.92873e-05	0.00266565	PRG3	protein_coding	ENSG00000156575	FALSE
45.1063	5.46435	1.02399	5.33632	9.48517e-08	4.11485e-05	TLR10	protein_coding	ENSG00000174123	FALSE
86.3558	5.22931	0.779005	6.71281	1.90912e-11	3.72696e-08	CDCP1	protein_coding	ENSG00000163814	FALSE
27.6341	5.17483	1.15027	4.49881	6.83342e-06	0.00126297	ATP1A4	protein_coding	ENSG00000132681	FALSE
73.3692	4.97458	0.841923	5.9086	3.45035e-09	2.83609e-06	TEX55	protein_coding	ENSG00000163424	FALSE
86.2285	4.96727	0.774718	6.41171	1.43892e-10	1.87269e-07	IYD	protein_coding	ENSG00000009765	FALSE
24.0005	4.93896	1.21915	4.05115	5.09668e-05	0.00562525	FAM183A	protein_coding	ENSG00000186973	FALSE
121.114	4.8729	0.678659	7.18018	6.96185e-13	1.67272e-09	LRIT3	protein_coding	ENSG00000183423	FALSE
29.022	4.83892	1.09136	4.43386	9.25621e-06	0.00157988	PATE4	protein_coding	ENSG00000237353	FALSE
21.1071	4.78805	1.21488	3.94116	8.10874e-05	0.00814394	COL23A1	protein_coding	ENSG00000050767	FALSE
40.0602	4.67278	0.973177	4.80157	1.57426e-06	0.000403048	LY86	protein_coding	ENSG00000112799	FALSE
92.6189	4.65804	0.776543	5.99843	1.99236e-09	1.94473e-06	CYP3A43	protein_coding	ENSG00000021461	FALSE
19.3464	4.6555	1.2471	3.73307	0.000189162	0.0147712	GADL1	protein_coding	ENSG00000144644	FALSE
33.111	4.64793	1.06669	4.35736	1.3164e-05	0.00198637	REN	protein_coding	ENSG00000143839	FALSE
56.7995	4.60271	0.820421	5.61018	2.02111e-08	1.12731e-05	PI15	protein_coding	ENSG00000137558	FALSE
17.7494	4.52996	1.25137	3.62	0.000294604	0.0200042	MCOLN3	protein_coding	ENSG00000055732	FALSE
29.3696	4.52277	1.01096	4.47376	7.68544e-06	0.0013876	GCM1	protein_coding	ENSG00000137270	FALSE
16.9241	4.43347	1.2699	3.49121	0.000480837	0.0290246	OR13A1	protein_coding	ENSG00000256574	FALSE
187.32	4.41231	0.599723	7.35724	1.87749e-13	6.00314e-10	GRIN2B	protein_coding	ENSG00000273079	FALSE
21.4065	4.35046	1.13542	3.83158	0.000127323	0.0111087	SPX	protein_coding	ENSG00000134548	FALSE
66.7334	4.31074	0.727419	5.92608	3.10243e-09	2.61904e-06	SHISAL2A	protein_coding	ENSG00000182183	FALSE
15.3839	4.29178	1.28637	3.33634	0.000848895	0.0444886	SPATA4	protein_coding	ENSG00000150628	FALSE
35.229	4.27969	0.919454	4.6546	3.24606e-06	0.000694457	IL18RAP	protein_coding	ENSG00000115607	FALSE
25.0531	4.27767	1.0389	4.11749	3.83021e-05	0.00449761	ATP2B2	protein_coding	ENSG00000157087	FALSE
256.017	4.21817	0.74524	5.66015	1.51242e-08	8.74824e-06	TMEM215	protein_coding	ENSG00000188133	FALSE
393.36	4.15706	0.641875	6.47642	9.39216e-11	1.2755e-07	HGF	protein_coding	ENSG00000019991	FALSE
82.3478	4.12851	0.709426	5.8195	5.90231e-09	4.38949e-06	TNC	protein_coding	ENSG00000041982	FALSE
80.3019	4.11182	0.748633	5.49245	3.96402e-08	1.90764e-05	CACNA2D2	protein_coding	ENSG00000007402	FALSE
48.9598	4.08909	0.791191	5.16827	2.36274e-07	8.5814e-05	MYCBPAP	protein_coding	ENSG00000136449	FALSE
18.0113	4.07954	1.20629	3.38188	0.000719907	0.0393117	FBLN7	protein_coding	ENSG00000144152	FALSE
45.3428	4.07153	0.939361	4.33437	1.46181e-05	0.00214365	PGR	protein_coding	ENSG00000082175	FALSE
39.7198	3.91103	0.854277	4.57817	4.69059e-06	0.000927282	PAPPA2	protein_coding	ENSG00000116183	FALSE
32.0141	3.90365	0.92628	4.21433	2.5052e-05	0.00319388	TNFSF8	protein_coding	ENSG00000106952	FALSE
52.8641	3.89974	0.903022	4.31855	1.5706e-05	0.00225307	BLNK	protein_coding	ENSG00000095585	FALSE
110.021	3.78437	0.825717	4.58313	4.58071e-06	0.000917169	HYDIN	protein_coding	ENSG00000157423	FALSE
21.7704	3.7261	1.1322	3.29102	0.000998254	0.0499687	CYP3A4	protein_coding	ENSG00000160868	FALSE
180.125	3.7194	0.564185	6.59251	4.32455e-11	7.10933e-08	TAF1L	protein_coding	ENSG00000122728	FALSE
71.6454	3.67732	0.673996	5.45599	4.87004e-08	2.30479e-05	IGSF11	protein_coding	ENSG00000144847	FALSE
40.112	3.60633	0.900365	4.00541	6.19099e-05	0.00651165	MLF1	protein_coding	ENSG00000178053	FALSE
22.4599	3.60471	1.07207	3.36238	0.000772738	0.0414716	IRF6	protein_coding	ENSG00000117595	FALSE
83.5287	3.58022	0.651874	5.49219	3.96979e-08	1.90764e-05	CTRC	protein_coding	ENSG00000162438	FALSE
624.289	3.5615	0.489951	7.26909	3.6193e-13	1.02772e-09	OTOGL	protein_coding	ENSG00000165899	FALSE
87.2867	3.53731	0.769702	4.59569	4.31327e-06	0.000875101	LINGO3	protein_coding	ENSG00000220008	FALSE
80.4733	3.52496	0.670912	5.25398	1.4885e-07	6.1991e-05	CD14	protein_coding	ENSG00000170458	FALSE
24.3475	3.52284	0.985465	3.5748	0.000350491	0.0228074	DNAJC5B	protein_coding	ENSG00000147570	FALSE
27.4727	3.51877	0.94199	3.73547	0.000187368	0.0146677	RAD21L1	protein_coding	ENSG00000244588	FALSE
133.423	3.43518	0.566743	6.06126	1.35062e-09	1.36086e-06	DHH	protein_coding	ENSG00000139549	FALSE
676.966	3.43314	0.565192	6.07428	1.24545e-09	1.34144e-06	DCAF4L1	protein_coding	ENSG00000182308	FALSE
94.6277	3.41686	0.713149	4.79123	1.6576e-06	0.000414201	PDC	protein_coding	ENSG00000116703	FALSE
159.613	3.40763	0.577408	5.9016	3.59992e-09	2.88316e-06	CYP27A1	protein_coding	ENSG00000135929	FALSE
65.8416	3.39906	0.70153	4.84521	1.2648e-06	0.000346544	RBMXL2	protein_coding	ENSG00000170748	FALSE
44.5686	3.37576	0.767241	4.39987	1.08317e-05	0.00172616	TRIM9	protein_coding	ENSG00000100505	FALSE
111.218	3.3638	0.604002	5.56918	2.55934e-08	1.33235e-05	LHFPL4	protein_coding	ENSG00000156959	FALSE
33.7596	3.35683	0.861644	3.89584	9.78584e-05	0.00926245	SSTR1	protein_coding	ENSG00000139874	FALSE
55.3323	3.33657	0.730975	4.56454	5.00579e-06	0.000971178	GRM7	protein_coding	ENSG00000196277	FALSE
76.8769	3.32561	0.716626	4.64065	3.4731e-06	0.000732987	GOLGA7B	protein_coding	ENSG00000155265	FALSE
134.53	3.25486	0.737782	4.41168	1.02571e-05	0.00167519	APOD	protein_coding	ENSG00000189058	FALSE
26.0754	3.24656	0.919883	3.52931	0.000416637	0.0259397	PON3	protein_coding	ENSG00000105852	FALSE
98.6677	3.24406	0.629933	5.14985	2.60693e-07	9.2531e-05	A1CF	protein_coding	ENSG00000148584	FALSE
454.851	3.24208	0.473763	6.84325	7.74187e-12	1.72727e-08	TP63	protein_coding	ENSG00000073282	FALSE
40.8462	3.23067	0.775634	4.1652	3.11086e-05	0.00384063	CAMK2B	protein_coding	ENSG00000058404	FALSE
99.6848	3.22542	0.71567	4.50685	6.57974e-06	0.00122512	B3GAT1	protein_coding	ENSG00000109956	FALSE
37.2624	3.21665	0.86659	3.71184	0.000205756	0.0157906	NGFR	protein_coding	ENSG00000064300	FALSE
61.5889	3.16167	0.687562	4.59838	4.25785e-06	0.000874961	TAS2R9	protein_coding	ENSG00000121381	FALSE
119.596	3.11535	0.603749	5.16	2.46949e-07	8.86602e-05	AC010325.1	protein_coding	ENSG00000261341	FALSE
53.6207	3.1062	0.730844	4.25015	2.13629e-05	0.00286994	RTL9	protein_coding	ENSG00000243978	FALSE
34.9872	3.09246	0.858137	3.60368	0.000313737	0.0209496	WDR63	protein_coding	ENSG00000162643	FALSE
27.5371	3.07349	0.891849	3.4462	0.000568524	0.0328395	OR52I2	protein_coding	ENSG00000226288	FALSE
64.1875	3.07268	0.911626	3.37054	0.000750203	0.0404708	AQP9	protein_coding	ENSG00000103569	FALSE
73.7198	3.06239	0.845209	3.62324	0.000290937	0.0197983	CSF1	protein_coding	ENSG00000184371	FALSE
93.7282	3.061	0.642285	4.76579	1.88117e-06	0.000448537	PCSK5	protein_coding	ENSG00000099139	FALSE
126.001	3.04681	0.626424	4.86381	1.15146e-06	0.000318282	LY6G5C	protein_coding	ENSG00000204428	FALSE
50.7429	3.0162	0.767897	3.92788	8.56997e-05	0.00839131	ANKFN1	protein_coding	ENSG00000153930	FALSE
114.496	3.0044	0.585468	5.13163	2.87249e-07	9.93055e-05	CYP2E1	protein_coding	ENSG00000130649	FALSE
314.412	3.00203	0.606973	4.94589	7.57958e-07	0.000223347	RRH	protein_coding	ENSG00000180245	FALSE
45.4689	3.00164	0.841876	3.56542	0.000363268	0.0233952	PIWIL2	protein_coding	ENSG00000197181	FALSE
93.3493	2.99102	0.629878	4.74856	2.04867e-06	0.000477538	ALOX5	protein_coding	ENSG00000012779	FALSE
41.4882	2.96736	0.760256	3.9031	9.49675e-05	0.00901614	TMEM272	protein_coding	ENSG00000281106	FALSE
580.138	2.90836	0.497236	5.84905	4.94392e-09	3.86058e-06	THSD1	protein_coding	ENSG00000136114	FALSE
473.617	2.90549	0.489556	5.93494	2.93961e-09	2.6078e-06	CMYA5	protein_coding	ENSG00000164309	FALSE
39.8501	2.88737	0.782752	3.68874	0.000225367	0.0168003	TAS2R7	protein_coding	ENSG00000121377	FALSE
51.3098	2.88407	0.726566	3.96945	7.20384e-05	0.00737744	ALDH8A1	protein_coding	ENSG00000118514	FALSE
531.967	2.87381	0.502685	5.71692	1.08474e-08	6.77636e-06	HLX	protein_coding	ENSG00000136630	FALSE
32.299	2.86257	0.828644	3.45452	0.000551264	0.0320312	C20orf173	protein_coding	ENSG00000125975	FALSE
52.7277	2.85117	0.722625	3.94557	7.96098e-05	0.00804729	GREM1	protein_coding	ENSG00000166923	FALSE
50.1679	2.84479	0.712832	3.99082	6.58446e-05	0.00683274	AP003071.5	protein_coding	ENSG00000287725	FALSE
88.3089	2.84343	0.635844	4.4719	7.75282e-06	0.00139172	C21orf62	protein_coding	ENSG00000205929	FALSE
285.659	2.83104	0.56877	4.97748	6.44186e-07	0.000195665	FAM83F	protein_coding	ENSG00000133477	FALSE
66.0402	2.81981	0.668392	4.21879	2.45617e-05	0.00315901	WEE2	protein_coding	ENSG00000214102	FALSE
143.39	2.80892	0.548426	5.12179	3.02652e-07	0.000102753	POLN	protein_coding	ENSG00000130997	FALSE
53.8	2.80102	0.798007	3.51001	0.000448083	0.0275509	ARMC3	protein_coding	ENSG00000165309	FALSE
556.131	2.78697	0.495829	5.62083	1.90046e-08	1.07929e-05	ZG16B	protein_coding	ENSG00000162078	FALSE
76.647	2.77218	0.628493	4.41083	1.02973e-05	0.00167519	VIPR1	protein_coding	ENSG00000114812	FALSE
46.9649	2.74686	0.741887	3.70253	0.000213459	0.0161838	CLEC3B	protein_coding	ENSG00000163815	FALSE
58.0399	2.73765	0.687859	3.97996	6.89282e-05	0.00710552	ENTPD2	protein_coding	ENSG00000054179	FALSE
80.6965	2.73256	0.624842	4.3732	1.22436e-05	0.00189296	PTPN22	protein_coding	ENSG00000134242	FALSE
337.447	2.70138	0.483204	5.59056	2.2634e-08	1.2403e-05	DRP2	protein_coding	ENSG00000102385	FALSE
268.948	2.68468	0.500596	5.36298	8.18614e-08	3.61247e-05	NLRP14	protein_coding	ENSG00000158077	FALSE
66.899	2.6845	0.716147	3.74853	0.000177873	0.0142458	CLEC19A	protein_coding	ENSG00000261210	FALSE
51.7979	2.66208	0.784214	3.39458	0.00068734	0.0379078	OR2AE1	protein_coding	ENSG00000244623	FALSE
250.439	2.66082	0.509567	5.22173	1.77258e-07	6.89953e-05	FAAH	protein_coding	ENSG00000117480	FALSE
105.364	2.65533	0.588259	4.51388	6.36512e-06	0.00119768	SLC26A3	protein_coding	ENSG00000091138	FALSE
58.4859	2.64356	0.736171	3.59096	0.000329467	0.0218028	TYRP1	protein_coding	ENSG00000107165	FALSE
157.674	2.61467	0.593566	4.40503	1.0577e-05	0.00170442	ABAT	protein_coding	ENSG00000183044	FALSE
86.6809	2.60715	0.736959	3.53771	0.000403608	0.0254681	NAT16	protein_coding	ENSG00000167011	FALSE
91.3337	2.60402	0.609562	4.27196	1.93763e-05	0.00266616	CDKL4	protein_coding	ENSG00000205111	FALSE
60.6639	2.60221	0.670239	3.88251	0.000103384	0.00949768	GRIA4	protein_coding	ENSG00000152578	FALSE
98.0198	2.59788	0.597678	4.34662	1.38249e-05	0.00206612	ANKRD6	protein_coding	ENSG00000135299	FALSE
278.534	2.59767	0.552418	4.70237	2.57162e-06	0.000569678	C9orf153	protein_coding	ENSG00000187753	FALSE
160.951	2.5877	0.54532	4.7453	2.08199e-06	0.00048171	PILRA	protein_coding	ENSG00000085514	FALSE
50.7369	2.56965	0.70544	3.64263	0.000269869	0.0186464	TXNDC2	protein_coding	ENSG00000168454	FALSE
85.7507	2.53707	0.601539	4.21764	2.46869e-05	0.00316023	MUC5AC	protein_coding	ENSG00000215182	FALSE
42.9409	2.52437	0.736063	3.42956	0.00060455	0.0344582	MAP7D2	protein_coding	ENSG00000184368	FALSE
362.726	2.48077	0.523649	4.73746	2.16413e-06	0.000497035	AEBP1	protein_coding	ENSG00000106624	FALSE
1909.15	2.47411	0.486201	5.08865	3.60625e-07	0.000119831	IL12RB2	protein_coding	ENSG00000081985	FALSE
99.7478	2.47221	0.613568	4.02924	5.59575e-05	0.00602103	CD53	protein_coding	ENSG00000143119	FALSE
82.009	2.47117	0.666567	3.7073	0.00020948	0.0159978	NCALD	protein_coding	ENSG00000104490	FALSE
177.763	2.47096	0.587225	4.20786	2.57796e-05	0.00326002	CATSPERB	protein_coding	ENSG00000133962	FALSE
135.806	2.46587	0.600585	4.10578	4.02946e-05	0.00467882	UPK1B	protein_coding	ENSG00000114638	FALSE
119.795	2.4407	0.640629	3.80985	0.000139053	0.0117652	ZNF382	protein_coding	ENSG00000161298	FALSE
104.059	2.43744	0.716525	3.40174	0.000669572	0.0372137	ARHGAP8	protein_coding	ENSG00000241484	FALSE
161.077	2.42118	0.592668	4.08522	4.40351e-05	0.00500159	DLEU7	protein_coding	ENSG00000186047	FALSE
78.9632	2.42115	0.623549	3.88285	0.000103241	0.00949768	SGK2	protein_coding	ENSG00000101049	FALSE
56.227	2.41002	0.671061	3.59135	0.000328968	0.0218028	FNDC7	protein_coding	ENSG00000143107	FALSE
74.063	2.35086	0.702517	3.34634	0.000818871	0.0431323	ABCA6	protein_coding	ENSG00000154262	FALSE
71.818	2.34173	0.710286	3.29688	0.000977647	0.0491736	ARHGAP20	protein_coding	ENSG00000137727	FALSE
588.216	2.33914	0.548843	4.26195	2.0265e-05	0.0027641	ABCA10	protein_coding	ENSG00000154263	FALSE
426.319	2.31497	0.536086	4.31828	1.5725e-05	0.00225307	SLC10A5	protein_coding	ENSG00000253598	FALSE
264.541	2.3112	0.608986	3.79516	0.00014755	0.0123558	TMPRSS11D	protein_coding	ENSG00000153802	FALSE
149.214	2.30187	0.554976	4.14769	3.3585e-05	0.00408181	LMCD1	protein_coding	ENSG00000071282	FALSE
69.2769	2.28823	0.631284	3.62473	0.000289269	0.0197277	TMEM74B	protein_coding	ENSG00000125895	FALSE
822.649	2.27362	0.45681	4.97717	6.45222e-07	0.000195665	OVGP1	protein_coding	ENSG00000085465	FALSE
705.344	2.24557	0.524395	4.28221	1.85047e-05	0.0025919	ADAM32	protein_coding	ENSG00000197140	FALSE
100.158	2.22157	0.574034	3.87011	0.000108786	0.00979234	RIPOR2	protein_coding	ENSG00000111913	FALSE
78.3841	2.2211	0.669153	3.31927	0.000902542	0.0462146	LEP	protein_coding	ENSG00000174697	FALSE
149.418	2.21575	0.570503	3.88384	0.000102818	0.00949768	SLC14A2	protein_coding	ENSG00000132874	FALSE
89.9532	2.19933	0.614804	3.57729	0.000347179	0.0226391	CFTR	protein_coding	ENSG00000001626	FALSE
64.8065	2.19489	0.638437	3.43791	0.000586221	0.0335974	ASGR1	protein_coding	ENSG00000141505	FALSE
269.722	2.19262	0.598474	3.66368	0.000248618	0.017893	LRRC69	protein_coding	ENSG00000214954	FALSE
145.567	2.18626	0.535301	4.08418	4.42335e-05	0.00500592	ADAP1	protein_coding	ENSG00000105963	FALSE
189.421	2.16542	0.578121	3.74562	0.000179951	0.0143177	SYNPO2	protein_coding	ENSG00000172403	FALSE
514.718	2.15127	0.503427	4.27326	1.92634e-05	0.00266565	COLQ	protein_coding	ENSG00000206561	FALSE
666.234	2.14518	0.466924	4.59427	4.34259e-06	0.000875101	SCART1	protein_coding	ENSG00000214279	FALSE
395.71	2.12391	0.528846	4.01613	5.91629e-05	0.006307	MLANA	protein_coding	ENSG00000120215	FALSE
344.563	2.10725	0.545644	3.86195	0.000112487	0.0099816	ERVW-1	protein_coding	ENSG00000242950	FALSE
223.539	2.10674	0.558342	3.77321	0.00016116	0.0131089	DYNLRB2	protein_coding	ENSG00000168589	FALSE
333.415	2.07212	0.525024	3.94672	7.92292e-05	0.00803482	ANKAR	protein_coding	ENSG00000151687	FALSE
191.365	2.06331	0.547673	3.76742	0.000164945	0.013382	SLC14A1	protein_coding	ENSG00000141469	FALSE
141.603	2.04529	0.534583	3.82596	0.000130263	0.0112087	SLC1A2	protein_coding	ENSG00000110436	FALSE
188.975	2.00043	0.513808	3.89334	9.88714e-05	0.00929361	NFASC	protein_coding	ENSG00000163531	FALSE
124.125	1.99239	0.589729	3.37848	0.000728868	0.0396624	CELA2B	protein_coding	ENSG00000215704	FALSE
1149.21	1.98495	0.467153	4.24904	2.14687e-05	0.00286994	PCDH12	protein_coding	ENSG00000113555	FALSE
413.63	1.98338	0.470146	4.21866	2.45763e-05	0.00315901	NXPH3	protein_coding	ENSG00000182575	FALSE
113.291	1.94605	0.555546	3.50295	0.000460133	0.0280708	HSD17B13	protein_coding	ENSG00000170509	FALSE
2433.86	1.94504	0.468432	4.15223	3.29252e-05	0.00404142	SLC6A14	protein_coding	ENSG00000268104	FALSE
188.09	1.93258	0.52491	3.68173	0.000231654	0.0171057	BOC	protein_coding	ENSG00000144857	FALSE
589.72	1.93047	0.557276	3.46411	0.000531981	0.0313518	GRIK1	protein_coding	ENSG00000171189	FALSE
1316.34	1.92722	0.481809	3.99997	6.33509e-05	0.00659589	KIRREL3	protein_coding	ENSG00000149571	FALSE
157.237	1.90179	0.527142	3.60773	0.00030889	0.0207488	GAS6	protein_coding	ENSG00000183087	FALSE
315.042	1.89581	0.478111	3.96521	7.33304e-05	0.00748522	PRDM6	protein_coding	ENSG00000061455	FALSE
313.258	1.88835	0.495225	3.81311	0.00013723	0.0116477	MAP1A	protein_coding	ENSG00000166963	FALSE
123.826	1.83045	0.5465	3.3494	0.000809867	0.0429463	RND2	protein_coding	ENSG00000108830	FALSE
173.934	1.80528	0.527005	3.42555	0.000613558	0.0347183	KIAA2012	protein_coding	ENSG00000182329	FALSE
300.656	1.79463	0.514347	3.48914	0.000484582	0.0291075	GRIN2C	protein_coding	ENSG00000161509	FALSE
893.66	1.78962	0.455494	3.92896	8.53154e-05	0.00837996	MAPK13	protein_coding	ENSG00000156711	FALSE
499.178	1.78093	0.515567	3.4543	0.000551714	0.0320312	GPR156	protein_coding	ENSG00000175697	FALSE
901.552	1.74469	0.512435	3.40471	0.000662339	0.0368773	MINAR1	protein_coding	ENSG00000169330	FALSE
225.133	1.73782	0.501953	3.46212	0.000535946	0.0314667	TLR1	protein_coding	ENSG00000174125	FALSE
211.668	1.7137	0.51618	3.31996	0.000900297	0.0461787	KCNB1	protein_coding	ENSG00000158445	FALSE
201.72	1.66922	0.505001	3.30539	0.000948449	0.0480207	CAMK1G	protein_coding	ENSG00000008118	FALSE
19.4219	4.24186	1.15665	3.66736	0.00024507	0.0178366	AL357673.1	protein_coding	ENSG00000256407
