# Supplementary material for: ZC3H4 restricts non-coding transcription in human cells
Source: eLife. 2021 Apr 29;10:e67305. doi: 10.7554/eLife.67305 (PMC8137146; doi:10.7554/eLife.67305)
Supplement: Supplementary file 6. [file elife-67305-supp6.xlsx]

## Sheet: upregulated_z4_PROMPTs
prompt_id	baseMean	log2FoldChange	lfcSE	stat	pvalue	padj	gene_biotype	nearby_gene
MSTRG.13936	48.5	5.24031	1.13303	4.62503	3.74542e-06	0.00175344	PROMPT	ISCU
MSTRG.23074	15.25	4.27301	1.28455	3.32646	0.000879571	0.0635283	PROMPT	MIEF2
MSTRG.24289	45.5	4.2647	1.02657	4.15433	3.26244e-05	0.00715935	PROMPT	MRPL45P2
MSTRG.5617	106	4.19162	0.939437	4.46184	8.1259e-06	0.0029015	PROMPT	KLF6
MSTRG.47445	8	3.90688	1.43101	2.73016	0.00633043	0.211688	PROMPT	RN7SL353P
MSTRG.28166	11.25	3.80735	1.3138	2.89796	0.00375603	0.159533	PROMPT	AKT2
MSTRG.43535	271.5	3.71192	0.874484	4.2447	2.18884e-05	0.00562344	PROMPT	FAT1
MSTRG.27168	10.5	3.70043	1.2799	2.89118	0.00383794	0.162357	PROMPT	LDLR
MSTRG.21781	66	3.68871	1.01844	3.62193	0.000292409	0.0319181	PROMPT	TERF2
MSTRG.53550	17.25	3.67807	1.16064	3.169	0.00152962	0.0900125	PROMPT	PRAG1
MSTRG.6905	13.75	3.67242	1.1883	3.09049	0.00199827	0.106041	PROMPT	PLAU
MSTRG.8690	24	3.66838	1.08329	3.38632	0.000708356	0.0573959	PROMPT	SBF2
MSTRG.23349	10.25	3.66296	1.32206	2.77064	0.00559461	0.197756	PROMPT	MYO18A
MSTRG.39610	16	3.56071	1.13372	3.14072	0.0016853	0.0960288	PROMPT	AC069528.2
MSTRG.21395	12	3.45943	1.26495	2.73482	0.00624139	0.209709	PROMPT	AC007906.2
MSTRG.3229	8.75	3.41503	1.27939	2.66927	0.00760169	0.232094	PROMPT	PRPF3
MSTRG.51569	23.25	3.40939	1.02532	3.3252	0.000883552	0.0635283	PROMPT	METTL27
MSTRG.46972	31.75	3.39855	1.01913	3.33476	0.000853733	0.0626676	PROMPT	MCUR1
MSTRG.58035	17.25	3.39231	1.19591	2.8366	0.00455972	0.181587	PROMPT	PIP5KL1
MSTRG.19650	11.25	3.35755	1.22188	2.74785	0.0059987	0.20449	PROMPT	SNUPN
MSTRG.45322	5.5	3.32192	1.47072	2.2587	0.0239019	NA	PROMPT	PJA2
MSTRG.1184	5.5	3.32192	1.47991	2.24468	0.0247886	NA	PROMPT	ZSCAN20
MSTRG.28235	10.75	3.2854	1.24829	2.63191	0.00849061	0.245079	PROMPT	AC006486.1
MSTRG.38062	21.25	3.26678	1.07095	3.05036	0.00228569	0.116875	PROMPT	DCAF1
MSTRG.40448	5.25	3.24792	1.46911	2.21081	0.0270493	NA	PROMPT	BCL6
MSTRG.57366	13	3.23266	1.15973	2.78743	0.00531276	0.194182	PROMPT	TRMO
MSTRG.1278	66.75	3.21245	0.905954	3.54593	0.000391231	0.0376998	PROMPT	STK40
MSTRG.53381	50.25	3.17792	0.979021	3.24602	0.00117033	0.0747129	PROMPT	AC021218.1
MSTRG.45741	10	3.16992	1.25795	2.51991	0.0117383	0.290183	PROMPT	LINC01843
MSTRG.33491	45.5	3.1008	0.914957	3.38901	0.000701449	0.0570557	PROMPT	HJURP
MSTRG.12326	11.75	3.07039	1.20563	2.54671	0.0108744	0.277193	PROMPT	AC008124.1
MSTRG.9678	11.75	3.07039	1.21966	2.51742	0.0118218	0.290419	PROMPT	SLC25A45
MSTRG.7138	25.75	3.06413	1.00305	3.05481	0.00225205	0.115516	PROMPT	ANXA11
MSTRG.38687	9.25	3.04439	1.23139	2.47233	0.0134237	0.311108	PROMPT	SENP7
MSTRG.36512	64.25	3.03185	0.935114	3.24222	0.00118602	0.0750324	PROMPT	TOB2
MSTRG.48729	16	3.02553	1.12455	2.69045	0.00713565	0.222822	PROMPT	SYNCRIP
MSTRG.25443	11.25	3	1.15589	2.59541	0.0094478	0.25782	PROMPT	PDE6G
MSTRG.16059	6.75	3	1.31723	2.27751	0.0227561	0.417597	PROMPT	PIP4P1
MSTRG.15202	4.5	2.99999	1.50697	1.99075	0.0465085	NA	PROMPT	MIR8079
MSTRG.25186	15.5	2.974	1.06846	2.78344	0.00537857	0.195028	PROMPT	EVPL
MSTRG.26677	11	2.96347	1.15569	2.56424	0.0103401	0.270671	PROMPT	UQCR11
MSTRG.14131	4.25	2.90688	1.50465	1.93193	0.0533679	NA	PROMPT	LINC01234
MSTRG.3010	4.25	2.90688	1.51296	1.92133	0.0546907	NA	PROMPT	AC253572.2
MSTRG.22272	4.25	2.90688	1.52618	1.90468	0.0568221	NA	PROMPT	SLC7A5
MSTRG.29915	14.75	2.89308	1.16238	2.48893	0.0128128	0.303288	PROMPT	CALM2
MSTRG.46385	23	2.88042	1.04716	2.75069	0.00594701	0.203868	PROMPT	PANK3
MSTRG.5710	6.25	2.87446	1.32901	2.16286	0.0305521	NA	PROMPT	UPF2
MSTRG.45547	68.5	2.86849	0.969228	2.95957	0.00308073	0.138976	PROMPT	CSNK1G3
MSTRG.17291	8.25	2.85798	1.2556	2.27619	0.0228347	0.417949	PROMPT	ZFYVE1
MSTRG.2734	16.25	2.83289	1.08194	2.61834	0.00883576	0.246611	PROMPT	PSRC1
MSTRG.1877	16.25	2.83289	1.17979	2.40119	0.016342	0.348014	PROMPT	TACSTD2
MSTRG.25091	28	2.80735	1.00207	2.80154	0.00508589	0.191659	PROMPT	FDXR
MSTRG.3538	14	2.80735	1.06443	2.63741	0.00835414	0.243425	PROMPT	MEF2D
MSTRG.6790	4	2.80735	1.53245	1.83193	0.0669618	NA	PROMPT	PSAP
MSTRG.56525	4	2.80735	1.53245	1.83193	0.0669618	NA	PROMPT	SHB
MSTRG.34125	7.75	2.75488	1.24243	2.21734	0.0265997	0.451955	PROMPT	RRBP1
MSTRG.20641	7.5	2.70044	1.2683	2.12918	0.0332396	0.50817	PROMPT	UBALD1
MSTRG.16996	3.75	2.70043	1.52435	1.77153	0.0764731	NA	PROMPT	AL161756.1
MSTRG.57073	3.75	2.70043	1.52949	1.76558	0.0774659	NA	PROMPT	NFIL3
MSTRG.40360	3.75	2.70043	1.54022	1.75328	0.0795547	NA	PROMPT	ABCC5
MSTRG.36281	20.5	2.69031	1.00746	2.6704	0.00757601	0.231646	PROMPT	H1-0
MSTRG.6961	5.5	2.66296	1.36895	1.94525	0.0517444	NA	PROMPT	COMTD1
MSTRG.9973	12.75	2.65207	1.07961	2.4565	0.0140297	0.318839	PROMPT	CCND1
MSTRG.44251	19.5	2.60666	0.996888	2.61479	0.00892813	0.248139	PROMPT	PLK2
MSTRG.2555	23	2.60334	0.985384	2.64196	0.0082429	0.241857	PROMPT	F3
MSTRG.6794	33.5	2.59756	0.918602	2.82773	0.00468787	0.18458	PROMPT	DDIT4
MSTRG.41660	8.75	2.58496	1.17775	2.19484	0.0281752	0.467744	PROMPT	FRYL
MSTRG.13945	7	2.58496	1.23833	2.08746	0.0368462	0.537389	PROMPT	CORO1C
MSTRG.8420	7	2.58496	1.24428	2.07748	0.0377577	0.543204	PROMPT	ZNF195
MSTRG.33492	7	2.58496	1.29921	1.98964	0.0466306	0.602293	PROMPT	MSL3P1
MSTRG.28927	3.5	2.58496	1.56611	1.65056	0.0988279	NA	PROMPT	ZNF787
MSTRG.48138	33	2.57225	0.933073	2.75675	0.00583785	0.201948	PROMPT	GSTA10P
MSTRG.28892	15.5	2.55799	1.02182	2.50336	0.0123019	0.296703	PROMPT	ZNF579
MSTRG.46012	24	2.5502	1.05108	2.42627	0.015255	0.334532	PROMPT	GNPDA1
MSTRG.27603	12	2.5502	1.13722	2.24247	0.0249309	0.436271	PROMPT	LSM4
MSTRG.16046	8.5	2.53605	1.17206	2.16376	0.0304827	0.487238	PROMPT	TEP1
MSTRG.3877	8.5	2.53605	1.18655	2.13733	0.0325712	0.505286	PROMPT	SCYL3
MSTRG.756	8.5	2.53605	1.2019	2.11004	0.0348551	0.522256	PROMPT	SRSF10
MSTRG.39790	6.75	2.52356	1.24088	2.03369	0.0419827	0.572089	PROMPT	SSR3
MSTRG.26742	6.75	2.52356	1.42878	1.76623	0.0773577	0.775306	PROMPT	LMNB2
MSTRG.31868	11.75	2.51457	1.11809	2.24898	0.0245136	0.433796	PROMPT	WDSUB1
MSTRG.7561	122.5	2.51408	0.871365	2.88522	0.00391142	0.164827	PROMPT	WNT8B
MSTRG.34467	92.25	2.51326	0.856381	2.93475	0.00333819	0.146817	PROMPT	RBM39
MSTRG.42014	15	2.5025	1.04668	2.39089	0.0168075	0.353025	PROMPT	CCNG2
MSTRG.59237	5	2.5025	1.37575	1.81901	0.0689102	NA	PROMPT	PLP2
MSTRG.36787	5	2.5025	1.37575	1.81901	0.0689102	NA	PROMPT	SBF1
MSTRG.16429	18.25	2.49476	1.0274	2.42824	0.0151723	0.333648	PROMPT	TRAPPC6B
MSTRG.46669	11.5	2.47805	1.08445	2.28506	0.0223092	0.411891	PROMPT	ZFP62
MSTRG.29439	14.75	2.47393	1.07058	2.31082	0.0208427	0.400267	PROMPT	PPM1G
MSTRG.23836	18	2.4713	1.05076	2.35193	0.0186764	0.374778	PROMPT	NR1D1
MSTRG.7827	9.75	2.45943	1.13472	2.16744	0.0302015	0.485278	PROMPT	SMNDC1
MSTRG.37777	3.25	2.45943	1.56198	1.57455	0.115359	NA	PROMPT	ZNF852
MSTRG.50987	3.25	2.45943	1.56198	1.57455	0.115359	NA	PROMPT	KBTBD2
MSTRG.42740	24.25	2.45066	0.969657	2.52735	0.0114927	0.286191	PROMPT	ANKRD50
MSTRG.58164	27.25	2.4361	0.97805	2.49077	0.0127466	0.302086	PROMPT	NTMT1
MSTRG.12539	8	2.43296	1.22083	1.99287	0.0462758	0.600672	PROMPT	BCDIN3D
MSTRG.28890	12.75	2.42626	1.07125	2.26489	0.0235191	0.423848	PROMPT	UBE2S
MSTRG.7779	4.75	2.41503	1.38044	1.74947	0.0802102	NA	PROMPT	STN1
MSTRG.9517	4.75	2.41503	1.38044	1.74947	0.0802102	NA	PROMPT	ZBTB3
MSTRG.7571	4.75	2.41503	1.39575	1.73028	0.0835808	NA	PROMPT	CWF19L1
MSTRG.11689	4.75	2.41503	1.49546	1.61491	0.106331	NA	PROMPT	RPL13AP20
MSTRG.7838	15.75	2.40599	1.01476	2.37098	0.0177408	0.363919	PROMPT	SMC3
MSTRG.16349	11	2.4021	1.08539	2.21312	0.0268893	0.45489	PROMPT	NFKBIA
MSTRG.1768	25	2.39232	0.958182	2.49673	0.0125346	0.299394	PROMPT	NRDC
MSTRG.9337	54.25	2.37851	0.920547	2.5838	0.00977178	0.264604	PROMPT	FNBP4
MSTRG.50529	7.75	2.37851	1.19786	1.98563	0.0470739	0.60341	PROMPT	FBXL18
MSTRG.3030	7.75	2.37851	1.20907	1.96721	0.0491585	0.619392	PROMPT	RNVU1-2A
MSTRG.29096	18.5	2.36923	1.03558	2.28784	0.0221467	0.410863	PROMPT	EIPR1
MSTRG.30218	10.75	2.36257	1.11654	2.11597	0.0343477	0.515754	PROMPT	SERTAD2
MSTRG.47214	6	2.32193	1.26732	1.83215	0.0669292	NA	PROMPT	ABT1
MSTRG.35191	6	2.32193	1.2886	1.80189	0.071562	NA	PROMPT	LTN1
MSTRG.1027	6	2.32193	1.2892	1.80106	0.0716932	NA	PROMPT	SRSF4
MSTRG.54270	6	2.32193	1.2892	1.80106	0.0716932	NA	PROMPT	ASPH
MSTRG.37547	4.5	2.32192	1.40056	1.65786	0.0973461	NA	PROMPT	GLB1
MSTRG.22020	3	2.32192	1.57728	1.47211	0.140992	NA	PROMPT	GCSH
MSTRG.36544	3	2.32192	1.57728	1.47211	0.140992	NA	PROMPT	NAGA
MSTRG.57356	3	2.32192	1.57728	1.47211	0.140992	NA	PROMPT	MFSD14C
MSTRG.30376	3	2.32192	1.61307	1.43944	0.150026	NA	PROMPT	LINC01816
MSTRG.10070	20.75	2.30117	0.987322	2.33072	0.0197682	0.385966	PROMPT	ANAPC15
MSTRG.36614	14.75	2.29278	1.06208	2.15876	0.0308686	0.488926	PROMPT	TTLL12
MSTRG.7809	27.75	2.27563	0.968109	2.3506	0.0187433	0.375186	PROMPT	ITPRIP
MSTRG.20553	7.25	2.26303	1.21045	1.86959	0.0615414	0.695728	PROMPT	ZSCAN10
MSTRG.54891	13	2.25634	1.08944	2.07111	0.0383489	0.546245	PROMPT	NIPAL2
MSTRG.22891	10	2.23704	1.09667	2.03984	0.0413662	0.567728	PROMPT	ELAC2
MSTRG.47666	8.5	2.22239	1.14095	1.94785	0.0514329	0.635132	PROMPT	ANKS1A
MSTRG.27169	4.25	2.22239	1.39347	1.59486	0.110742	NA	PROMPT	SPC24
MSTRG.45878	4.25	2.22239	1.40654	1.58004	0.114099	NA	PROMPT	SPATA24
MSTRG.37882	45.75	2.18442	1.03225	2.11618	0.0343293	0.515754	PROMPT	MAP4
MSTRG.24240	5.5	2.16992	1.26703	1.71261	0.0867841	NA	PROMPT	CDC27
MSTRG.22192	5.5	2.16992	1.33504	1.62536	0.104087	NA	PROMPT	C16orf74
MSTRG.14255	2.75	2.16992	1.59687	1.35886	0.174192	NA	PROMPT	RNU4-1
MSTRG.2713	21.75	2.14975	0.991142	2.16896	0.0300857	0.484623	PROMPT	TAF13
MSTRG.862	24.25	2.13386	0.969677	2.20058	0.0277654	0.463866	PROMPT	AL512408.1
MSTRG.32130	17.5	2.13245	0.970244	2.19785	0.0279599	0.466374	PROMPT	OLA1
MSTRG.23759	28.25	2.13124	0.979142	2.17664	0.0295071	0.478711	PROMPT	RPL23
MSTRG.21087	14.75	2.12553	1.02297	2.0778	0.0377276	0.543204	PROMPT	XPO6
MSTRG.50256	54.75	2.11818	0.90534	2.33965	0.0193017	0.381453	PROMPT	C6orf99
MSTRG.36272	24	2.11548	0.963756	2.19503	0.0281611	0.467744	PROMPT	LGALS1
MSTRG.9904	8	2.11548	1.14018	1.85539	0.0635399	0.704636	PROMPT	KMT5B
MSTRG.59930	8	2.11548	1.15395	1.83324	0.0667663	0.722056	PROMPT	C1GALT1C1
MSTRG.33427	4	2.11547	1.414	1.49609	0.13463	NA	PROMPT	LINC00471
MSTRG.28321	4	2.11547	1.43286	1.4764	0.139837	NA	PROMPT	MIR4531
MSTRG.59096	17.25	2.10691	1.02856	2.0484	0.0405206	0.561615	PROMPT	DDX3X
MSTRG.54171	26.5	2.10434	0.960132	2.19171	0.0284001	0.468974	PROMPT	TCEA1
MSTRG.45826	9.25	2.09953	1.12585	1.86484	0.0622032	0.698323	PROMPT	HNRNPA0
MSTRG.26416	14.5	2.09516	1.00103	2.09301	0.0363484	0.533625	PROMPT	VPS4B
MSTRG.25415	25	2.09192	0.979802	2.13505	0.0327573	0.505625	PROMPT	AC027601.6
MSTRG.28641	22.25	2.08246	0.977174	2.13111	0.0330803	0.507501	PROMPT	RRAS
MSTRG.25160	18.25	2.07529	1.08632	1.91038	0.0560837	0.667523	PROMPT	WBP2
MSTRG.10394	44.25	2.07241	0.978527	2.11789	0.0341846	0.515032	PROMPT	HIKESHI
MSTRG.27009	6.5	2.07039	1.21534	1.70355	0.0884653	0.81892	PROMPT	EVI5L
MSTRG.43234	7.75	2.05889	1.1622	1.77154	0.0764706	0.773407	PROMPT	PPID
MSTRG.9074	15.25	2.02975	1.05577	1.92253	0.0545391	0.65736	PROMPT	CAPRIN1
MSTRG.47703	25.25	2.01792	1.06805	1.88935	0.0588455	0.682766	PROMPT	FKBP5
MSTRG.1284	25	2	0.926309	2.15911	0.0308419	0.488898	PROMPT	MRPS15
MSTRG.38085	15	2	1.00464	1.99077	0.0465067	0.602293	PROMPT	POC1A
MSTRG.55734	8.75	2	1.18696	1.68497	0.0919946	0.83173	PROMPT	TONSL
MSTRG.50565	7.5	2	1.14618	1.74493	0.0809966	0.795503	PROMPT	CYTH3
MSTRG.50700	5	2	1.29942	1.53915	0.123767	NA	PROMPT	ETV1
MSTRG.189	5	2	1.31643	1.51925	0.128698	NA	PROMPT	ACOT7
MSTRG.27132	5	2	1.33251	1.50093	0.133374	NA	PROMPT	TYK2
MSTRG.14137	3.75	2	1.41361	1.41481	0.157124	NA	PROMPT	MED13L
MSTRG.18065	3.75	2	1.41361	1.41481	0.157124	NA	PROMPT	INF2
MSTRG.19993	3.75	2	1.42332	1.40517	0.159972	NA	PROMPT	MFGE8
MSTRG.27361	3.75	2	1.44074	1.38817	0.165085	NA	PROMPT	RFX1
MSTRG.36407	3.75	2	1.44074	1.38817	0.165085	NA	PROMPT	MRTFA
MSTRG.26719	2.5	1.99999	1.62246	1.23269	0.21769	NA	PROMPT	MKNK2
MSTRG.30488	2.5	1.99999	1.62818	1.22836	0.21931	NA	PROMPT	PCGF1
MSTRG.45544	2.5	1.99999	1.62818	1.22836	0.21931	NA	PROMPT	CEP120
MSTRG.49674	2.5	1.99999	1.62818	1.22836	0.21931	NA	PROMPT	MAP3K5
MSTRG.52752	2.5	1.99999	1.64683	1.21445	0.224577	NA	PROMPT	IMPDH1
MSTRG.53764	2.5	1.99999	1.64683	1.21445	0.224577	NA	PROMPT	BIN3
MSTRG.31151	2.5	1.99999	1.68544	1.18663	0.235373	NA	PROMPT	RALB
MSTRG.29763	22.25	1.97982	0.953874	2.07556	0.0379348	0.543381	PROMPT	THADA
MSTRG.16195	14.75	1.96963	1.04971	1.87636	0.060606	0.691722	PROMPT	TINF2
MSTRG.53262	11	1.95936	1.05356	1.85975	0.0629212	0.701578	PROMPT	ABCF2
MSTRG.51662	11	1.95936	1.05724	1.85328	0.0638419	0.706385	PROMPT	YWHAG
MSTRG.46395	9.75	1.9542	1.0933	1.78742	0.0738689	0.758011	PROMPT	NPM1
MSTRG.16033	8.5	1.94753	1.1365	1.71362	0.0865977	0.81408	PROMPT	CHAMP1
MSTRG.53324	13.25	1.93289	1.01484	1.90462	0.05683	0.670019	PROMPT	XRCC2
MSTRG.1758	6	1.926	1.22141	1.57686	0.114828	NA	PROMPT	COA7
MSTRG.51238	6	1.926	1.24582	1.54597	0.122111	NA	PROMPT	NUDCD3
MSTRG.38115	38.25	1.91886	0.925754	2.07276	0.0381948	0.545526	PROMPT	RFT1
MSTRG.37862	21.5	1.91754	1.04389	1.83691	0.0662228	0.718456	PROMPT	SMARCC1
MSTRG.47149	29.75	1.91073	0.922782	2.07062	0.0383941	0.546519	PROMPT	H2AC4
MSTRG.12483	9.5	1.90689	1.11009	1.71778	0.0858364	0.811996	PROMPT	CCNT1
MSTRG.29446	4.75	1.90689	1.32142	1.44306	0.149004	NA	PROMPT	IFT172
MSTRG.3394	4.75	1.90689	1.35918	1.40297	0.160626	NA	PROMPT	RAB13
MSTRG.24072	27.25	1.9027	0.989195	1.92349	0.0544191	0.657264	PROMPT	GPATCH8
MSTRG.17677	16.5	1.89308	0.984288	1.9233	0.0544418	0.657264	PROMPT	PPP4R3A
MSTRG.24487	23.5	1.88753	0.989852	1.90688	0.0565367	0.669561	PROMPT	ANKRD40
MSTRG.35033	7	1.87447	1.15635	1.62102	0.105013	0.883161	PROMPT	MRGBP
MSTRG.16187	7	1.87447	1.17567	1.59438	0.110851	0.908327	PROMPT	EMC9
MSTRG.12808	7	1.87447	1.20033	1.56163	0.118376	0.928166	PROMPT	ANKRD52
MSTRG.2352	3.5	1.87447	1.4277	1.31293	0.189207	NA	PROMPT	ODF2L
MSTRG.27197	3.5	1.87447	1.4277	1.31293	0.189207	NA	PROMPT	RGL3
MSTRG.24043	3.5	1.87447	1.4277	1.31293	0.189207	NA	PROMPT	HDAC5
MSTRG.51212	9.25	1.85798	1.16884	1.5896	0.111925	0.912512	PROMPT	COA1
MSTRG.26641	33.5	1.85626	0.909323	2.04137	0.041214	0.566747	PROMPT	PWWP3A
MSTRG.26893	5.75	1.848	1.22044	1.51421	0.129974	NA	PROMPT	MYDGF
MSTRG.36610	5.75	1.848	1.22565	1.50776	0.131615	NA	PROMPT	MCAT
MSTRG.27982	20.5	1.83007	0.971006	1.88472	0.0594677	0.686093	PROMPT	CAPNS1
MSTRG.33207	10.25	1.83007	1.06522	1.71803	0.0857915	0.811996	PROMPT	CUL3
MSTRG.16226	22.75	1.82782	0.937966	1.9487	0.0513307	0.635075	PROMPT	HECTD1
MSTRG.1679	26	1.81629	0.938653	1.93499	0.052991	0.646421	PROMPT	STIL
MSTRG.50686	11.25	1.80735	1.12204	1.61078	0.107228	0.89323	PROMPT	CRPPA
MSTRG.25746	6.75	1.80735	1.18954	1.51937	0.128669	0.958335	PROMPT	AFG3L2
MSTRG.26782	6.75	1.80735	1.17284	1.54101	0.123315	0.94331	PROMPT	TLE5
MSTRG.45735	4.5	1.80735	1.32886	1.36008	0.173805	NA	PROMPT	CDKN2AIPNL
MSTRG.2526	4.5	1.80735	1.39465	1.29592	0.195005	NA	PROMPT	GCLM
MSTRG.719	2.25	1.80735	1.6568	1.09086	0.275332	NA	PROMPT	E2F2
MSTRG.3221	2.25	1.80735	1.6568	1.09086	0.275332	NA	PROMPT	OTUD7B
MSTRG.27281	2.25	1.80735	1.67168	1.08116	0.279628	NA	PROMPT	GADD45GIP1
MSTRG.48041	2.25	1.80735	1.67168	1.08116	0.279628	NA	PROMPT	NFKBIE
MSTRG.52522	2.25	1.80735	1.67168	1.08116	0.279628	NA	PROMPT	BMT2
MSTRG.37947	29	1.79141	1.0241	1.74926	0.0802459	0.791916	PROMPT	LAMB2
MSTRG.36040	7.75	1.77761	1.1386	1.56122	0.118472	0.928166	PROMPT	NF2
MSTRG.47966	7.75	1.77761	1.14029	1.55891	0.119018	0.92975	PROMPT	PEX6
MSTRG.56431	7.75	1.77761	1.16328	1.5281	0.126488	0.952027	PROMPT	TPM2
MSTRG.40057	34.25	1.77372	0.978911	1.81194	0.0699959	0.739846	PROMPT	RPL22L1
MSTRG.28406	18.75	1.77052	0.973713	1.81832	0.0690158	0.734321	PROMPT	IRF2BP1
MSTRG.22734	5.5	1.76553	1.25082	1.4115	0.158098	NA	PROMPT	NEURL4
MSTRG.37099	8.75	1.75489	1.09681	1.59998	0.109602	0.901595	PROMPT	RAF1
MSTRG.18361	8.75	1.75489	1.11388	1.57547	0.115148	0.921534	PROMPT	ZNF770
MSTRG.23363	8.75	1.75489	1.12058	1.56605	0.117336	0.927047	PROMPT	NUFIP2
MSTRG.8159	8.75	1.75489	1.21104	1.44907	0.147317	0.999999	PROMPT	CHST15
MSTRG.28070	24	1.75002	0.959669	1.82357	0.0682175	0.730624	PROMPT	HNRNPL
MSTRG.37978	12	1.75002	1.07373	1.62984	0.103134	0.874969	PROMPT	NICN1
MSTRG.35203	6.5	1.73696	1.18938	1.4604	0.144181	0.999999	PROMPT	CCT8
MSTRG.42604	6.5	1.73696	1.18938	1.4604	0.144181	0.999999	PROMPT	CAMK2D
MSTRG.49524	6.5	1.73696	1.18938	1.4604	0.144181	0.999999	PROMPT	ARHGAP18
MSTRG.6902	3.25	1.73696	1.44985	1.19803	0.230907	NA	PROMPT	CAMK2G
MSTRG.55726	3.25	1.73696	1.44985	1.19803	0.230907	NA	PROMPT	DGAT1
MSTRG.12499	3.25	1.73696	1.46315	1.18714	0.235173	NA	PROMPT	RHEBL1
MSTRG.18060	3.25	1.73696	1.46315	1.18714	0.235173	NA	PROMPT	LINC02280
MSTRG.16096	10.75	1.72247	1.08816	1.58292	0.11344	0.915431	PROMPT	CHD8
MSTRG.4207	10.75	1.72247	1.14721	1.50144	0.133242	0.967032	PROMPT	EDEM3
MSTRG.58863	7.5	1.71621	1.15017	1.49213	0.135664	0.973466	PROMPT	EIF1AX
MSTRG.24315	7.5	1.71621	1.15017	1.49213	0.135664	0.973466	PROMPT	CBX1
MSTRG.20012	7.5	1.71621	1.16556	1.47243	0.140905	0.992698	PROMPT	ZNF710
MSTRG.48838	68	1.70044	0.928194	1.83199	0.0669533	0.723336	PROMPT	NDUFAF4
MSTRG.24488	29.75	1.70044	0.895627	1.8986	0.0576167	0.674339	PROMPT	LUC7L3
MSTRG.55704	4.25	1.70044	1.3161	1.29203	0.196348	NA	PROMPT	TSTA3
MSTRG.8233	4.25	1.70044	1.32183	1.28642	0.198295	NA	PROMPT	MKI67
MSTRG.26800	4.25	1.70044	1.3338	1.27488	0.202352	NA	PROMPT	DOHH
MSTRG.38431	26.5	1.69599	0.983599	1.72427	0.0846583	0.80983	PROMPT	MAGI1
MSTRG.52259	28.5	1.68806	0.960581	1.75733	0.078862	0.782934	PROMPT	IFT22
MSTRG.34784	19	1.68806	0.984533	1.71458	0.086423	0.813523	PROMPT	SPATA2
MSTRG.573	5.25	1.67807	1.35298	1.24028	0.214872	NA	PROMPT	SDHB
MSTRG.55663	6.25	1.66296	1.21752	1.36586	0.171982	NA	PROMPT	PTK2
MSTRG.898	6.25	1.66296	1.3378	1.24306	0.213846	NA	PROMPT	WASF2
MSTRG.43337	13.5	1.65711	1.01648	1.63025	0.103049	0.874969	PROMPT	HMGB2
MSTRG.24506	20.75	1.65535	0.943615	1.75427	0.079385	0.785904	PROMPT	SPAG9
MSTRG.29408	7.25	1.65208	1.18039	1.3996	0.161633	0.999999	PROMPT	SLC35F6
MSTRG.56893	16.5	1.64386	0.993671	1.65433	0.0980612	0.854814	PROMPT	GNAQ
MSTRG.28325	19.5	1.63472	0.958488	1.70552	0.0880984	0.818608	PROMPT	CBLC
MSTRG.28208	10.25	1.63227	1.0554	1.54659	0.121963	0.938549	PROMPT	RABAC1
MSTRG.47167	12.25	1.62449	1.02023	1.59227	0.111323	0.909529	PROMPT	H4C8
MSTRG.41359	12.25	1.62449	1.05142	1.54504	0.122336	0.938549	PROMPT	DHX15
MSTRG.28876	13.25	1.62149	1.0194	1.59063	0.111693	0.91132	PROMPT	PPP6R1
MSTRG.50000	14.25	1.61891	1.03009	1.57162	0.116038	0.924225	PROMPT	PPIL4
MSTRG.49301	35.5	1.61218	0.883374	1.82503	0.0679963	0.729075	PROMPT	GOPC
MSTRG.60145	18.25	1.61143	1.05306	1.53023	0.125959	0.949739	PROMPT	AIFM1
MSTRG.47526	21.25	1.60768	0.948807	1.69442	0.0901846	0.824556	PROMPT	HSPA1B
MSTRG.4541	21	1.58496	0.968171	1.63707	0.101616	0.869662	PROMPT	ELK4
MSTRG.6822	16	1.58496	1.03521	1.53105	0.125758	0.948903	PROMPT	DNAJB12
MSTRG.4970	11	1.58496	1.05451	1.50304	0.132829	0.966269	PROMPT	PYCR2
MSTRG.22163	8	1.58496	1.14706	1.38175	0.167047	0.999999	PROMPT	COTL1
MSTRG.39551	7	1.58496	1.13604	1.39516	0.162968	0.999999	PROMPT	GK5
MSTRG.30449	7	1.58496	1.1516	1.37632	0.168723	0.999999	PROMPT	TPRKB
MSTRG.24741	5	1.58496	1.27513	1.24298	0.213876	NA	PROMPT	METTL2A
MSTRG.20081	4	1.58496	1.32923	1.19239	0.23311	NA	PROMPT	FAM174B
MSTRG.58023	4	1.58496	1.35842	1.16677	0.243303	NA	PROMPT	ST6GALNAC4
MSTRG.60370	3	1.58496	1.46888	1.07902	0.280577	NA	PROMPT	FAM3A
MSTRG.3084	3	1.58496	1.47912	1.07155	0.283921	NA	PROMPT	PIAS3
MSTRG.47153	3	1.58496	1.47912	1.07155	0.283921	NA	PROMPT	H1-2
MSTRG.41825	3	1.58496	1.5018	1.05538	0.291254	NA	PROMPT	CENPC
MSTRG.48992	3	1.58496	1.5018	1.05538	0.291254	NA	PROMPT	ATG5
MSTRG.51589	3	1.58496	1.5018	1.05538	0.291254	NA	PROMPT	GTF2IRD1
MSTRG.12842	2	1.58496	1.69574	0.934671	0.349958	NA	PROMPT	ATP5F1B
MSTRG.607	2	1.58496	1.70499	0.9296	0.352578	NA	PROMPT	TMCO4
MSTRG.6356	2	1.58496	1.70499	0.9296	0.352578	NA	PROMPT	NCOA4
MSTRG.11170	2	1.58496	1.70499	0.9296	0.352578	NA	PROMPT	NFRKB
MSTRG.18073	2	1.58496	1.70499	0.9296	0.352578	NA	PROMPT	AKT1
MSTRG.33512	2	1.58496	1.70499	0.9296	0.352578	NA	PROMPT	ARL4C
MSTRG.43180	2	1.58496	1.70499	0.9296	0.352578	NA	PROMPT	CTSO
MSTRG.20350	2	1.58496	1.7376	0.912152	0.361689	NA	PROMPT	CACNA1H
MSTRG.23683	2	1.58496	1.7376	0.912152	0.361689	NA	PROMPT	RDM1
MSTRG.4997	2	1.58496	1.7376	0.912152	0.361689	NA	PROMPT	PARP1
MSTRG.33434	87.5	1.57399	0.943193	1.66879	0.0951588	0.845756	PROMPT	PTMA
MSTRG.24891	16.75	1.55639	0.979973	1.5882	0.112241	0.913151	PROMPT	AMZ2P1
MSTRG.8319	15.75	1.55459	0.997626	1.55829	0.119165	0.92975	PROMPT	MIR210HG
MSTRG.5427	11.75	1.54432	1.04949	1.47149	0.141158	0.992914	PROMPT	ADSS2
MSTRG.14938	47.75	1.53504	0.917538	1.673	0.0943279	0.840898	PROMPT	HSPH1
MSTRG.53171	17.5	1.53051	0.982631	1.55757	0.119336	0.930093	PROMPT	PDIA4
MSTRG.36400	7.75	1.52356	1.13156	1.34643	0.178165	0.999999	PROMPT	RPS19BP1
MSTRG.33675	6.75	1.51457	1.15868	1.30715	0.191161	0.999999	PROMPT	ILKAP
MSTRG.12717	6.75	1.51457	1.14764	1.31972	0.186928	0.999999	PROMPT	ATF7
MSTRG.47184	12.5	1.50901	1.01075	1.49296	0.135447	0.973466	PROMPT	H3C6
MSTRG.21640	12.5	1.50901	1.05049	1.43648	0.150866	0.999999	PROMPT	GFOD2
MSTRG.14568	52.75	1.50404	0.874256	1.72037	0.0853654	0.8111	PROMPT	RAN
MSTRG.24841	17.25	1.5025	1.07494	1.39775	0.162188	0.999999	PROMPT	SMARCD2
MSTRG.34717	11.5	1.5025	1.03589	1.45044	0.146935	0.999999	PROMPT	ZNF335
MSTRG.4699	5.75	1.5025	1.20033	1.25174	0.210663	NA	PROMPT	ANGEL2
MSTRG.44544	5.75	1.5025	1.21271	1.23896	0.215361	NA	PROMPT	ANKRD31
MSTRG.56075	5.75	1.5025	1.21271	1.23896	0.215361	NA	PROMPT	PSIP1
MSTRG.47631	22	1.49881	0.969646	1.54572	0.122171	0.938549	PROMPT	LEMD2
MSTRG.54962	15.25	1.49185	1.04557	1.42684	0.153627	0.999999	PROMPT	PABPC1
MSTRG.16131	4.75	1.48543	1.26624	1.1731	0.240757	NA	PROMPT	PSMB5
MSTRG.46232	4.75	1.48543	1.29157	1.1501	0.250104	NA	PROMPT	DCTN4
MSTRG.43303	22.75	1.48113	0.938086	1.57888	0.114363	0.915903	PROMPT	SH3RF1
MSTRG.3429	40.75	1.48063	0.910091	1.6269	0.103759	0.875138	PROMPT	ADAR
MSTRG.12666	8.5	1.47393	1.07992	1.36485	0.172301	0.999999	PROMPT	SPRYD3
MSTRG.49262	8.5	1.47393	1.09974	1.34025	0.180164	0.999999	PROMPT	KPNA5
MSTRG.29379	16	1.46713	1.00968	1.45305	0.146209	0.999999	PROMPT	ASXL2
MSTRG.35135	86.25	1.45943	0.877417	1.66333	0.0962469	0.847004	PROMPT	HSPA13
MSTRG.57301	15	1.45943	0.980457	1.48852	0.136613	0.97693	PROMPT	ZNF367
MSTRG.1896	3.75	1.45943	1.3619	1.07161	0.283895	NA	PROMPT	AL136985.1
MSTRG.9510	3.75	1.45943	1.3619	1.07161	0.283895	NA	PROMPT	UBXN1
MSTRG.25635	3.75	1.45943	1.45984	0.999722	0.317445	NA	PROMPT	AP005329.1
MSTRG.12570	25.25	1.45457	0.95643	1.52083	0.128303	0.957138	PROMPT	CERS5
MSTRG.55774	17.75	1.45251	0.944793	1.53739	0.124199	0.945816	PROMPT	ZNF250
MSTRG.6472	6.5	1.44057	1.15834	1.24365	0.213627	0.999999	PROMPT	CCDC6
MSTRG.20719	6.5	1.44057	1.16867	1.23266	0.217703	0.999999	PROMPT	C16orf72
MSTRG.35782	22	1.41504	1.05138	1.34588	0.17834	0.999999	PROMPT	MAPK1
MSTRG.19199	5.5	1.41504	1.21444	1.16518	0.243948	NA	PROMPT	PPIB
MSTRG.50110	2.75	1.41504	1.49375	0.947306	0.343483	NA	PROMPT	RGS17
MSTRG.2948	2.75	1.41504	1.4998	0.94348	0.345435	NA	PROMPT	ATP1A1-AS1
MSTRG.6475	2.75	1.41504	1.4998	0.94348	0.345435	NA	PROMPT	ARID5B
MSTRG.25334	2.75	1.41504	1.4998	0.94348	0.345435	NA	PROMPT	LGALS3BP
MSTRG.36324	2.75	1.41504	1.51953	0.931233	0.351733	NA	PROMPT	GTPBP1
MSTRG.52971	2.75	1.41504	1.51953	0.931233	0.351733	NA	PROMPT	MTPN
MSTRG.57633	12.75	1.4021	1.0223	1.37151	0.170215	0.999999	PROMPT	PTBP3
MSTRG.17117	7.25	1.39232	1.12204	1.24088	0.214649	0.999999	PROMPT	ZFYVE26
MSTRG.44660	11.75	1.38702	1.02696	1.35062	0.176819	0.999999	PROMPT	HOMER1
MSTRG.29572	4.5	1.37851	1.29976	1.06059	0.288876	NA	PROMPT	YIPF4
MSTRG.879	4.5	1.37851	1.30655	1.05507	0.291392	NA	PROMPT	TENT5B
MSTRG.40968	4.5	1.37851	1.33259	1.03446	0.300921	NA	PROMPT	GRPEL1
MSTRG.42281	19.75	1.37346	0.961951	1.42779	0.153354	0.999999	PROMPT	STPG2
MSTRG.42986	6.25	1.36257	1.18704	1.14788	0.25102	NA	PROMPT	OTUD4
MSTRG.58269	30.25	1.35548	0.906809	1.49478	0.134971	0.972469	PROMPT	SETX
MSTRG.615	16	1.35364	0.992596	1.36373	0.172651	0.999999	PROMPT	DDOST
MSTRG.5796	31	1.34645	0.934585	1.44069	0.149671	0.999999	PROMPT	MINDY3
MSTRG.12299	24.5	1.32193	0.940539	1.4055	0.159872	0.999999	PROMPT	TWF1
MSTRG.22188	24.5	1.32193	0.914231	1.44595	0.148192	0.999999	PROMPT	ZDHHC7
MSTRG.48662	17.5	1.32193	0.961788	1.37445	0.169303	0.999999	PROMPT	ME1
MSTRG.24119	15.75	1.32193	1.00096	1.32066	0.186615	0.999999	PROMPT	AC138150.2
MSTRG.10104	8.75	1.32193	1.13019	1.16966	0.24214	0.999999	PROMPT	FAM168A
MSTRG.25314	7	1.32193	1.13077	1.16905	0.242383	0.999999	PROMPT	CYTH1
MSTRG.50886	5.25	1.32193	1.23038	1.07441	0.282641	NA	PROMPT	CYCS
MSTRG.40579	5.25	1.32193	1.22056	1.08305	0.278787	NA	PROMPT	ACAP2
MSTRG.50598	3.5	1.32193	1.38107	0.957177	0.338478	NA	PROMPT	CCZ1B
MSTRG.59225	3.5	1.32193	1.38107	0.957177	0.338478	NA	PROMPT	GRIPAP1
MSTRG.56471	3.5	1.32193	1.38371	0.955348	0.339402	NA	PROMPT	RNF38
MSTRG.1405	3.5	1.32193	1.39756	0.945884	0.344208	NA	PROMPT	CITED4
MSTRG.2319	3.5	1.32193	1.39756	0.945884	0.344208	NA	PROMPT	ZNHIT6
MSTRG.16554	1.75	1.32192	1.7512	0.754868	0.450328	NA	PROMPT	TRIM9
MSTRG.46140	1.75	1.32192	1.7512	0.754868	0.450328	NA	PROMPT	PRELID2
MSTRG.10114	1.75	1.32192	1.77857	0.74325	0.45733	NA	PROMPT	RAB6A
MSTRG.16256	1.75	1.32192	1.77857	0.74325	0.45733	NA	PROMPT	DTD2
MSTRG.22451	1.75	1.32192	1.77857	0.74325	0.45733	NA	PROMPT	AC144836.1
MSTRG.26310	7.75	1.28951	1.17495	1.0975	0.272424	0.999999	PROMPT	ATP8B1
MSTRG.51241	186.5	1.28557	0.996587	1.28998	0.197059	0.999999	PROMPT	AC004938.2
MSTRG.47754	13.75	1.2854	1.01434	1.26723	0.205072	0.999999	PROMPT	MTCH1
MSTRG.39110	19.75	1.28379	0.947856	1.35442	0.175603	0.999999	PROMPT	OSBPL11
MSTRG.10670	32.5	1.27564	0.890365	1.43271	0.151941	0.999999	PROMPT	DCUN1D5
MSTRG.38008	4.25	1.26303	1.33931	0.943051	0.345655	NA	PROMPT	MON1A
MSTRG.1641	11	1.25376	1.02099	1.22798	0.219455	0.999999	PROMPT	IPP
MSTRG.35461	11	1.25376	1.1081	1.13145	0.257865	0.999999	PROMPT	PRDM15
MSTRG.50148	11	1.25376	1.04169	1.20358	0.228752	0.999999	PROMPT	TFB1M
MSTRG.49676	16	1.24393	0.999563	1.24447	0.213327	0.999999	PROMPT	PERP
MSTRG.55765	16	1.24393	0.969841	1.28261	0.199629	0.999999	PROMPT	ZNF517
MSTRG.66	16.75	1.23266	0.955926	1.28949	0.197226	0.999999	PROMPT	AURKAIP1
MSTRG.58031	29.25	1.22827	0.919092	1.33639	0.18142	0.999999	PROMPT	FAM102A
MSTRG.13120	7.5	1.22239	1.10543	1.10581	0.26881	0.999999	PROMPT	HMGA2
MSTRG.55162	5	1.22239	1.24116	0.984876	0.324685	NA	PROMPT	EXT1
MSTRG.58797	2.5	1.22239	1.52712	0.800456	0.423446	NA	PROMPT	RBBP7
MSTRG.7468	2.5	1.22239	1.52712	0.800456	0.423446	NA	PROMPT	ENTPD1-AS1
MSTRG.18186	2.5	1.22239	1.52712	0.800456	0.423446	NA	PROMPT	MTMR10
MSTRG.29781	2.5	1.22239	1.52712	0.800456	0.423446	NA	PROMPT	SIX2
MSTRG.34821	2.5	1.22239	1.54275	0.792345	0.42816	NA	PROMPT	LINC01271
MSTRG.36319	2.5	1.22239	1.54275	0.792345	0.42816	NA	PROMPT	TPTEP2
MSTRG.58176	2.5	1.22239	1.58038	0.773479	0.439239	NA	PROMPT	AL391056.2
MSTRG.1498	21.5	1.20645	1.07139	1.12606	0.260139	0.999999	PROMPT	SLC2A1-AS1
MSTRG.9977	21.5	1.20645	1.00458	1.20096	0.229768	0.999999	PROMPT	LTO1
MSTRG.42022	8.25	1.20163	1.11577	1.07696	0.281499	0.999999	PROMPT	CNOT6L
MSTRG.39473	11.5	1.19265	1.00311	1.18895	0.234461	0.999999	PROMPT	PIK3CB
MSTRG.36603	5.75	1.19264	1.19087	1.00149	0.31659	NA	PROMPT	TTLL1
MSTRG.51271	5.75	1.19264	1.22373	0.974602	0.329758	NA	PROMPT	TBRG4
MSTRG.37950	9.75	1.16993	1.06575	1.09775	0.272313	0.999999	PROMPT	CCDC71
MSTRG.3369	3.25	1.16992	1.39591	0.838111	0.401968	NA	PROMPT	INTS3
MSTRG.34513	3.25	1.16992	1.39591	0.838111	0.401968	NA	PROMPT	NDRG3
MSTRG.1372	3.25	1.16992	1.40194	0.834502	0.403998	NA	PROMPT	TRIT1
MSTRG.17707	3.25	1.16992	1.40194	0.834502	0.403998	NA	PROMPT	ITPK1
MSTRG.43479	3.25	1.16992	1.40194	0.834502	0.403998	NA	PROMPT	CENPU
MSTRG.14658	3.25	1.16992	1.41258	0.82822	0.407546	NA	PROMPT	GJA3
MSTRG.42520	3.25	1.16992	1.41258	0.82822	0.407546	NA	PROMPT	ELOVL6
MSTRG.14845	17	1.16227	0.960184	1.21047	0.226099	0.999999	PROMPT	MTIF3
MSTRG.9447	24.25	1.1592	0.926004	1.25183	0.210632	0.999999	PROMPT	VPS37C
MSTRG.46461	54	1.15308	0.89799	1.28407	0.199118	0.999999	PROMPT	STC2
MSTRG.7554	7.25	1.152	1.12773	1.02152	0.307008	0.999999	PROMPT	BLOC1S2
MSTRG.5082	7.25	1.152	1.16403	0.98967	0.322336	0.999999	PROMPT	CDC42BPA
MSTRG.27625	11.25	1.14684	1.02405	1.11991	0.262753	0.999999	PROMPT	KXD1
MSTRG.27339	37.75	1.14585	0.916695	1.24998	0.211306	0.999999	PROMPT	ZSWIM4
MSTRG.7689	4	1.1375	1.32146	0.860792	0.389353	NA	PROMPT	CUEDC2
MSTRG.52955	4	1.1375	1.32146	0.860792	0.389353	NA	PROMPT	CNOT4
MSTRG.17609	4	1.1375	1.32317	0.859681	0.389965	NA	PROMPT	LINC02321
MSTRG.26179	4	1.1375	1.34935	0.843003	0.399227	NA	PROMPT	SMAD2
MSTRG.24842	4	1.1375	1.37635	0.826466	0.40854	NA	PROMPT	PLEKHM1P1
MSTRG.42780	55.5	1.11865	0.900607	1.2421	0.214199	0.999999	PROMPT	PGRMC2
MSTRG.12720	4.75	1.11548	1.22854	0.90797	0.363894	NA	PROMPT	CALCOCO1
MSTRG.21415	4.75	1.11548	1.24397	0.896708	0.369875	NA	PROMPT	AKTIP
MSTRG.11590	4.75	1.11548	1.34094	0.831863	0.405486	NA	PROMPT	LINC02598
MSTRG.3556	39.5	1.11103	0.962552	1.15426	0.248395	0.999999	PROMPT	GPATCH4
MSTRG.18700	20.5	1.10692	1.00131	1.10546	0.268958	0.999999	PROMPT	MFAP1
MSTRG.25124	42.5	1.10309	0.958392	1.15099	0.249738	0.999999	PROMPT	NUP85
MSTRG.48005	5.5	1.09954	1.23402	0.891022	0.372917	NA	PROMPT	MRPS18A
MSTRG.14201	11.75	1.09311	1.02124	1.07037	0.284452	0.999999	PROMPT	KSR2
MSTRG.35264	7	1.078	1.1403	0.945371	0.34447	0.999999	PROMPT	C21orf59-TCP10L
MSTRG.52126	7	1.078	1.10855	0.97244	0.330832	0.999999	PROMPT	SMURF1
MSTRG.37142	7	1.078	1.11192	0.969493	0.332299	0.999999	PROMPT	RBSN
MSTRG.25498	38.75	1.07039	0.929574	1.15149	0.249533	0.999999	PROMPT	FASN
MSTRG.7518	15.5	1.07039	1.07057	0.999828	0.317394	0.999999	PROMPT	LOXL4
MSTRG.29535	7.75	1.07039	1.14456	0.935201	0.349685	0.999999	PROMPT	TRMT61B
MSTRG.34431	26.25	1.06229	0.942045	1.12764	0.259473	0.999999	PROMPT	EDEM2
MSTRG.19202	10	1.05445	1.06358	0.991412	0.321484	0.999999	PROMPT	HERC1
MSTRG.46953	11.5	1.04731	1.00136	1.04588	0.295616	0.999999	PROMPT	RANBP9
MSTRG.60350	12.25	1.04439	0.988531	1.05651	0.290735	0.999999	PROMPT	MIR718
MSTRG.56876	12.25	1.04439	0.988991	1.05602	0.290959	0.999999	PROMPT	RFK
MSTRG.47079	26.75	1.04064	0.930781	1.11803	0.263554	0.999999	PROMPT	DEK
MSTRG.7332	20.5	1.02647	0.999999	1.02647	0.304668	0.999999	PROMPT	HTR7
MSTRG.2370	20.5	1.02647	0.989971	1.03687	0.299795	0.999999	PROMPT	GTF2B
MSTRG.20448	22.5	1	0.918022	1.0893	0.276022	0.999999	PROMPT	PGP
MSTRG.14271	15	1	0.992176	1.00789	0.313509	0.999999	PROMPT	POP5
MSTRG.50465	9.75	1	1.06656	0.937594	0.348453	0.999999	PROMPT	INTS1
MSTRG.14740	9.75	1	1.02712	0.973599	0.330256	0.999999	PROMPT	MICU2
MSTRG.47540	7.5	1	1.12785	0.886641	0.375272	0.999999	PROMPT	FKBPL
MSTRG.31056	6	1	1.15305	0.867264	0.385797	NA	PROMPT	ZC3H8

## Sheet: upregulated_ints1_PROMPTs
prompt_id	baseMean	log2FoldChange	lfcSE	stat	pvalue	padj	gene_biotype	upstream_gene
MSTRG.29439	6.75	3.64385	1.32509	2.7499	0.00596141	NA	PROMPT	PPM1G
MSTRG.28892	6	3.45943	1.35477	2.55351	0.0106643	NA	PROMPT	ZNF579
MSTRG.26677	9.75	2.76553	0.951227	2.90733	0.00364526	NA	PROMPT	UQCR11
MSTRG.46972	11	2.66296	0.895367	2.97416	0.00293794	0.0122724	PROMPT	MCUR1
MSTRG.28235	3.5	2.58496	1.53677	1.68207	0.0925551	NA	PROMPT	AC006486.1
MSTRG.28166	5	2.5025	1.28214	1.95181	0.0509607	NA	PROMPT	AKT2
MSTRG.708	3.25	2.45943	1.5564	1.58021	0.11406	NA	PROMPT	HNRNPR
MSTRG.31205	3.25	2.45943	1.5564	1.58021	0.11406	NA	PROMPT	TFCP2L1
MSTRG.32177	3.25	2.45943	1.5564	1.58021	0.11406	NA	PROMPT	TTC30A
MSTRG.24289	8	2.43296	1.00378	2.4238	0.0153589	NA	PROMPT	MRPL45P2
MSTRG.29096	9.5	2.41504	0.918538	2.62922	0.00855815	NA	PROMPT	EIPR1
MSTRG.35782	46	2.3599	0.443279	5.32373	1.01663e-07	1.49294e-06	PROMPT	MAPK1
MSTRG.55765	12	2.32193	0.81395	2.85267	0.00433542	0.0169292	PROMPT	ZNF517
MSTRG.6475	3	2.32192	1.5905	1.45987	0.144326	NA	PROMPT	ARID5B
MSTRG.15202	3	2.32192	1.5905	1.45987	0.144326	NA	PROMPT	MIR8079
MSTRG.17604	3	2.32192	1.5905	1.45987	0.144326	NA	PROMPT	NRDE2
MSTRG.20553	3	2.32192	1.59448	1.45622	0.145331	NA	PROMPT	ZSCAN10
MSTRG.29915	3	2.32192	1.59448	1.45622	0.145331	NA	PROMPT	CALM2
MSTRG.58863	3	2.32192	1.6728	1.38804	0.165124	NA	PROMPT	EIF1AX
MSTRG.16046	5.75	2.24793	1.15219	1.95101	0.0510558	NA	PROMPT	TEP1
MSTRG.57041	4.25	2.22239	1.33369	1.66635	0.0956433	NA	PROMPT	TUT7
MSTRG.37142	4.25	2.22239	1.35368	1.64174	0.100643	NA	PROMPT	RBSN
MSTRG.24900	7	2.20163	1.06392	2.06936	0.0385122	NA	PROMPT	GNA13
MSTRG.39790	2.75	2.16992	1.66373	1.30425	0.192149	NA	PROMPT	SSR3
MSTRG.9678	6.75	2.1375	1.07349	1.99117	0.0464617	NA	PROMPT	SLC25A45
MSTRG.40968	5.25	2.08746	1.20274	1.73559	0.082637	NA	PROMPT	GRPEL1
MSTRG.28325	15	2	0.721563	2.77176	0.00557541	0.020769	PROMPT	CBLC
MSTRG.40833	12.5	2	0.772905	2.58764	0.00966363	0.0326041	PROMPT	MXD4
MSTRG.24240	5	2	1.19995	1.66673	0.0955675	NA	PROMPT	CDC27
MSTRG.1372	5	2	1.21222	1.64986	0.098972	NA	PROMPT	TRIT1
MSTRG.55704	3.75	2	1.39516	1.43353	0.151707	NA	PROMPT	TSTA3
MSTRG.26742	3.75	2	1.39516	1.43353	0.151707	NA	PROMPT	LMNB2
MSTRG.16305	3.75	2	1.39516	1.43353	0.151707	NA	PROMPT	EAPP
MSTRG.4904	2.5	1.99999	1.6779	1.19197	0.233275	NA	PROMPT	TP53BP2
MSTRG.52522	2.5	1.99999	1.6779	1.19197	0.233275	NA	PROMPT	BMT2
MSTRG.60370	2.5	1.99999	1.6779	1.19197	0.233275	NA	PROMPT	FAM3A
MSTRG.9510	2.5	1.99999	1.68383	1.18777	0.234925	NA	PROMPT	UBXN1
MSTRG.23074	2.5	1.99999	1.68383	1.18777	0.234925	NA	PROMPT	MIEF2
MSTRG.27429	2.5	1.99999	1.68383	1.18777	0.234925	NA	PROMPT	ZNF861P
MSTRG.6794	13.5	1.96683	0.745742	2.63742	0.00835396	0.0289288	PROMPT	DDIT4
MSTRG.58164	20.75	1.95693	0.612461	3.19519	0.00139738	0.00659753	PROMPT	NTMT1
MSTRG.33675	6	1.926	1.10043	1.75022	0.0800807	NA	PROMPT	ILKAP
MSTRG.58035	4.75	1.90689	1.21786	1.56577	0.117403	NA	PROMPT	PIP5KL1
MSTRG.24119	22.5	1.90182	0.597343	3.1838	0.00145355	0.00681729	PROMPT	AC138150.2
MSTRG.24808	8.25	1.89308	0.940444	2.01297	0.0441179	NA	PROMPT	CYB561
MSTRG.8690	7	1.87447	1.02345	1.83153	0.0670218	NA	PROMPT	SBF2
MSTRG.46709	3.5	1.87447	1.41365	1.32598	0.184847	NA	PROMPT	WRNIP1
MSTRG.56299	3.5	1.87447	1.41365	1.32598	0.184847	NA	PROMPT	SMU1
MSTRG.4970	3.5	1.87447	1.42092	1.31919	0.187104	NA	PROMPT	PYCR2
MSTRG.57043	3.5	1.87447	1.43641	1.30497	0.191904	NA	PROMPT	CDK20
MSTRG.30449	5.75	1.848	1.12094	1.64861	0.0992267	NA	PROMPT	TPRKB
MSTRG.37978	28.5	1.83188	0.545968	3.35528	0.000792833	0.00411464	PROMPT	NICN1
MSTRG.22517	27.25	1.82443	0.538999	3.38485	0.000712182	0.00375007	PROMPT	METTL16
MSTRG.25415	18	1.80735	0.650515	2.77835	0.00546363	0.0204448	PROMPT	AC027601.6
MSTRG.58342	11.25	1.80735	0.80627	2.24162	0.0249857	0.0696684	PROMPT	NACC2
MSTRG.30793	4.5	1.80735	1.24091	1.45647	0.145262	NA	PROMPT	TMEM131
MSTRG.8273	2.25	1.80735	1.7359	1.04116	0.297803	NA	PROMPT	ECHS1
MSTRG.17609	2.25	1.80735	1.7359	1.04116	0.297803	NA	PROMPT	LINC02321
MSTRG.34804	2.25	1.80735	1.7359	1.04116	0.297803	NA	PROMPT	TMEM189
MSTRG.35033	2.25	1.80735	1.7359	1.04116	0.297803	NA	PROMPT	MRGBP
MSTRG.38001	2.25	1.80735	1.7359	1.04116	0.297803	NA	PROMPT	TRAIP
MSTRG.42986	2.25	1.80735	1.7359	1.04116	0.297803	NA	PROMPT	OTUD4
MSTRG.46140	2.25	1.80735	1.7359	1.04116	0.297803	NA	PROMPT	PRELID2
MSTRG.48005	2.25	1.80735	1.7359	1.04116	0.297803	NA	PROMPT	MRPS18A
MSTRG.25912	2.25	1.80735	1.7517	1.03177	0.30218	NA	PROMPT	OSBPL1A
MSTRG.27197	2.25	1.80735	1.7517	1.03177	0.30218	NA	PROMPT	RGL3
MSTRG.31056	2.25	1.80735	1.7517	1.03177	0.30218	NA	PROMPT	ZC3H8
MSTRG.34125	2.25	1.80735	1.7517	1.03177	0.30218	NA	PROMPT	RRBP1
MSTRG.4495	2.25	1.80735	1.79006	1.00966	0.31266	NA	PROMPT	ETNK2
MSTRG.50465	12.25	1.7885	0.769432	2.32444	0.0201021	0.0587662	PROMPT	INTS1
MSTRG.47526	10	1.78427	0.850131	2.09882	0.0358329	0.092892	PROMPT	HSPA1B
MSTRG.1679	7.75	1.77761	0.951908	1.86741	0.0618437	NA	PROMPT	STIL
MSTRG.36272	7.75	1.77761	0.955116	1.86114	0.0627242	NA	PROMPT	LGALS1
MSTRG.28641	18.75	1.77052	0.624688	2.83424	0.00459344	0.0177273	PROMPT	RRAS
MSTRG.57073	5.5	1.76553	1.14544	1.54136	0.12323	NA	PROMPT	NFIL3
MSTRG.51238	3.25	1.73696	1.45118	1.19693	0.231335	NA	PROMPT	NUDCD3
MSTRG.21395	4.25	1.70044	1.26246	1.34692	0.178005	NA	PROMPT	AC007906.2
MSTRG.23349	4.25	1.70044	1.27966	1.32882	0.183906	NA	PROMPT	MYO18A
MSTRG.5082	4.25	1.70044	1.31313	1.29495	0.195337	NA	PROMPT	CDC42BPA
MSTRG.25498	26.5	1.69599	0.531084	3.19346	0.00140581	0.00662565	PROMPT	FASN
MSTRG.9904	5.25	1.67807	1.14111	1.47056	0.14141	NA	PROMPT	KMT5B
MSTRG.10218	5.25	1.67807	1.16758	1.43722	0.150656	NA	PROMPT	KLHL35
MSTRG.35079	33	1.64386	0.49194	3.34158	0.000833033	0.00427831	PROMPT	TPD52L2
MSTRG.12483	8.25	1.64386	0.916124	1.79436	0.0727559	NA	PROMPT	CCNT1
MSTRG.24487	11.25	1.62803	0.808233	2.01431	0.0439772	0.10909	PROMPT	ANKRD40
MSTRG.20448	9	1.58496	0.876777	1.80771	0.0706509	NA	PROMPT	PGP
MSTRG.615	8	1.58496	0.944348	1.67837	0.0932757	NA	PROMPT	DDOST
MSTRG.12666	6	1.58496	1.06467	1.48868	0.136571	NA	PROMPT	SPRYD3
MSTRG.29535	5	1.58496	1.184	1.33864	0.180686	NA	PROMPT	TRMT61B
MSTRG.25556	5	1.58496	1.20828	1.31175	0.189604	NA	PROMPT	B3GNTL1
MSTRG.36281	4	1.58496	1.28759	1.23095	0.21834	NA	PROMPT	H1-0
MSTRG.25346	3	1.58496	1.48728	1.06567	0.286571	NA	PROMPT	CBX4
MSTRG.29572	3	1.58496	1.49764	1.0583	0.289917	NA	PROMPT	YIPF4
MSTRG.1342	2	1.58496	1.80186	0.879625	0.379062	NA	PROMPT	NDUFS5
MSTRG.24842	2	1.58496	1.80186	0.879625	0.379062	NA	PROMPT	PLEKHM1P1
MSTRG.44544	2	1.58496	1.80186	0.879625	0.379062	NA	PROMPT	ANKRD31
MSTRG.47445	2	1.58496	1.80186	0.879625	0.379062	NA	PROMPT	RN7SL353P
MSTRG.50886	2	1.58496	1.80186	0.879625	0.379062	NA	PROMPT	CYCS
MSTRG.7468	2	1.58496	1.81192	0.874739	0.381716	NA	PROMPT	ENTPD1-AS1
MSTRG.27274	2	1.58496	1.81192	0.874739	0.381716	NA	PROMPT	SYCE2
MSTRG.43962	34.25	1.54314	0.470205	3.28185	0.00103128	0.00509854	PROMPT	NUP155
MSTRG.40057	16.5	1.52725	0.659818	2.31465	0.0206322	0.0599477	PROMPT	RPL22L1
MSTRG.7554	9.5	1.48543	0.846043	1.75573	0.0791339	NA	PROMPT	BLOC1S2
MSTRG.27132	4.75	1.48543	1.20203	1.23576	0.216548	NA	PROMPT	TYK2
MSTRG.39551	4.75	1.48543	1.20203	1.23576	0.216548	NA	PROMPT	GK5
MSTRG.52126	4.75	1.48543	1.20272	1.23506	0.21681	NA	PROMPT	SMURF1
MSTRG.16187	4.75	1.48543	1.21056	1.22705	0.219802	NA	PROMPT	EMC9
MSTRG.26925	4.75	1.48543	1.21056	1.22705	0.219802	NA	PROMPT	DUS3L
MSTRG.37850	8.5	1.47393	0.89652	1.64406	0.100164	NA	PROMPT	ELP6
MSTRG.862	16	1.46713	0.676409	2.16899	0.0300833	0.0810218	PROMPT	AL512408.1
MSTRG.3394	3.75	1.45943	1.31729	1.10791	0.267903	NA	PROMPT	RAB13
MSTRG.18361	3.75	1.45943	1.31729	1.10791	0.267903	NA	PROMPT	ZNF770
MSTRG.26695	3.75	1.45943	1.3247	1.1017	0.270591	NA	PROMPT	ATP8B3
MSTRG.10104	3.75	1.45943	1.33238	1.09536	0.27336	NA	PROMPT	FAM168A
MSTRG.26179	3.75	1.45943	1.33992	1.0892	0.276068	NA	PROMPT	SMAD2
MSTRG.27603	3.75	1.45943	1.33992	1.0892	0.276068	NA	PROMPT	LSM4
MSTRG.20641	3.75	1.45943	1.35596	1.07631	0.281789	NA	PROMPT	UBALD1
MSTRG.27009	6.5	1.44057	1.02146	1.41031	0.158448	NA	PROMPT	EVI5L
MSTRG.5617	27.75	1.43296	0.509783	2.81092	0.00494	0.0188012	PROMPT	KLF6
MSTRG.52259	11	1.41504	0.783746	1.80548	0.0709995	0.159208	PROMPT	IFT22
MSTRG.42325	11	1.41504	0.805606	1.75649	0.0790049	0.173069	PROMPT	LAMTOR3
MSTRG.56297	8.25	1.41504	0.901832	1.56907	0.116632	NA	PROMPT	NDUFB6
MSTRG.26039	2.75	1.41503	1.53739	0.920412	0.357358	NA	PROMPT	RPRD1A
MSTRG.25186	2.75	1.41503	1.53739	0.920412	0.357358	NA	PROMPT	EVPL
MSTRG.27169	2.75	1.41503	1.53739	0.920412	0.357358	NA	PROMPT	SPC24
MSTRG.573	2.75	1.41503	1.55764	0.90845	0.363641	NA	PROMPT	SDHB
MSTRG.59305	37.25	1.39734	0.447651	3.12149	0.0017994	0.00818378	PROMPT	FAM120C
MSTRG.7138	7.25	1.39232	0.969321	1.43638	0.150893	NA	PROMPT	ANXA11
MSTRG.43535	45.25	1.38957	0.410458	3.38541	0.000710727	0.00374439	PROMPT	FAT1
MSTRG.6902	4.5	1.37851	1.20175	1.14708	0.251347	NA	PROMPT	CAMK2G
MSTRG.7838	4.5	1.37851	1.20175	1.14708	0.251347	NA	PROMPT	SMC3
MSTRG.56075	4.5	1.37851	1.23007	1.12068	0.262426	NA	PROMPT	PSIP1
MSTRG.16096	4.5	1.37851	1.23855	1.113	0.265706	NA	PROMPT	CHD8
MSTRG.21781	30.5	1.37197	0.494744	2.77309	0.00555267	0.0206959	PROMPT	TERF2
MSTRG.2194	8	1.35364	0.98016	1.38104	0.167268	NA	PROMPT	AC118549.1
MSTRG.25160	14	1.32193	0.712986	1.85407	0.0637287	0.146348	PROMPT	WBP2
MSTRG.21850	10.5	1.32193	0.805532	1.64106	0.100784	0.209132	PROMPT	AP1G1
MSTRG.2734	10.5	1.32193	0.801137	1.65007	0.0989296	0.206276	PROMPT	PSRC1
MSTRG.43628	5.25	1.32193	1.10889	1.19212	0.233215	NA	PROMPT	LPCAT1
MSTRG.60164	5.25	1.32193	1.13072	1.16911	0.24236	NA	PROMPT	PNKDP1
MSTRG.1641	5.25	1.32193	1.1434	1.15614	0.247624	NA	PROMPT	IPP
MSTRG.54962	5.25	1.32193	1.12131	1.17891	0.238432	NA	PROMPT	PABPC1
MSTRG.3229	3.5	1.32193	1.35305	0.976998	0.32857	NA	PROMPT	PRPF3
MSTRG.26248	3.5	1.32193	1.35305	0.976998	0.32857	NA	PROMPT	ELAC1
MSTRG.50529	3.5	1.32193	1.36454	0.968769	0.332661	NA	PROMPT	FBXL18
MSTRG.40360	3.5	1.32193	1.36657	0.967332	0.333378	NA	PROMPT	ABCC5
MSTRG.56790	3.5	1.32193	1.3689	0.965684	0.334202	NA	PROMPT	PTAR1
MSTRG.17892	1.75	1.32192	1.88961	0.699574	0.484193	NA	PROMPT	ZNF839
MSTRG.22192	1.75	1.32192	1.88961	0.699574	0.484193	NA	PROMPT	C16orf74
MSTRG.33427	1.75	1.32192	1.88961	0.699574	0.484193	NA	PROMPT	LINC00471
MSTRG.43346	1.75	1.32192	1.88961	0.699574	0.484193	NA	PROMPT	SPATA4
MSTRG.1405	1.75	1.32192	1.88961	0.699574	0.484193	NA	PROMPT	CITED4
MSTRG.29446	1.75	1.32192	1.88961	0.699574	0.484193	NA	PROMPT	IFT172
MSTRG.36229	1.75	1.32192	1.88961	0.699574	0.484193	NA	PROMPT	IFT27
MSTRG.45544	1.75	1.32192	1.88961	0.699574	0.484193	NA	PROMPT	CEP120
MSTRG.57935	1.75	1.32192	1.88961	0.699574	0.484193	NA	PROMPT	MAPKAP1
MSTRG.2948	1.75	1.32192	1.92056	0.688302	0.491263	NA	PROMPT	ATP1A1-AS1
MSTRG.16256	1.75	1.32192	1.92056	0.688302	0.491263	NA	PROMPT	DTD2
MSTRG.39754	1.75	1.32192	1.92056	0.688302	0.491263	NA	PROMPT	DHX36
MSTRG.48992	1.75	1.32192	1.92056	0.688302	0.491263	NA	PROMPT	ATG5
MSTRG.54248	1.75	1.32192	1.92056	0.688302	0.491263	NA	PROMPT	ARMC1
MSTRG.58031	28.5	1.29546	0.501627	2.58251	0.00980851	0.0329415	PROMPT	FAM102A
MSTRG.1108	6	1.28011	1.03839	1.23278	0.217657	NA	PROMPT	HDAC1
MSTRG.66	8.5	1.26303	0.891169	1.41728	0.156402	NA	PROMPT	AURKAIP1
MSTRG.40785	4.25	1.26303	1.25693	1.00485	0.314967	NA	PROMPT	FAM53A
MSTRG.47214	4.25	1.26303	1.25693	1.00485	0.314967	NA	PROMPT	ABT1
MSTRG.41833	4.25	1.26303	1.25254	1.00838	0.313273	NA	PROMPT	YTHDC1
MSTRG.60145	15.25	1.25634	0.66292	1.89516	0.0580711	0.136228	PROMPT	AIFM1
MSTRG.36512	34.25	1.22741	0.46262	2.65318	0.00797385	0.0279	PROMPT	TOB2
MSTRG.47631	20	1.22239	0.584222	2.09234	0.0364077	0.0941047	PROMPT	LEMD2
MSTRG.28208	10	1.22239	0.833743	1.46615	0.142607	0.271142	PROMPT	RABAC1
MSTRG.41359	5	1.22239	1.14647	1.06622	0.286325	NA	PROMPT	DHX15
MSTRG.35189	2.5	1.22239	1.58608	0.7707	0.440885	NA	PROMPT	N6AMT1
MSTRG.26893	2.5	1.22239	1.58608	0.7707	0.440885	NA	PROMPT	MYDGF
MSTRG.56431	2.5	1.22239	1.58608	0.7707	0.440885	NA	PROMPT	TPM2
MSTRG.57366	2.5	1.22239	1.58608	0.7707	0.440885	NA	PROMPT	TRMO
MSTRG.5863	2.5	1.22239	1.60238	0.762857	0.445549	NA	PROMPT	LINC02643
MSTRG.12717	2.5	1.22239	1.60238	0.762857	0.445549	NA	PROMPT	ATF7
MSTRG.37777	2.5	1.22239	1.60238	0.762857	0.445549	NA	PROMPT	ZNF852
MSTRG.59930	2.5	1.22239	1.60238	0.762857	0.445549	NA	PROMPT	C1GALT1C1
MSTRG.55740	23.25	1.21501	0.547322	2.21992	0.026424	0.0731029	PROMPT	SLC39A4
MSTRG.50565	8.25	1.20163	0.907309	1.32439	0.185372	NA	PROMPT	CYTH3
MSTRG.1520	63.5	1.20082	0.35746	3.35931	0.000781381	0.00406478	PROMPT	ELOVL1
MSTRG.53171	11.5	1.19265	0.757637	1.57416	0.115449	0.232113	PROMPT	PDIA4
MSTRG.31250	11.5	1.19265	0.794891	1.50039	0.133514	0.258286	PROMPT	WDR33
MSTRG.9517	5.75	1.19264	1.06944	1.1152	0.264764	NA	PROMPT	ZBTB3
MSTRG.898	5.75	1.19264	1.05622	1.12916	0.258831	NA	PROMPT	WASF2
MSTRG.46385	5.75	1.19264	1.05622	1.12916	0.258831	NA	PROMPT	PANK3
MSTRG.20603	9	1.18442	0.857502	1.38125	0.167202	NA	PROMPT	AC009171.2
MSTRG.19693	9.75	1.16993	0.828779	1.41162	0.158061	NA	PROMPT	SIN3A
MSTRG.45854	9.75	1.16993	0.820414	1.42602	0.153863	NA	PROMPT	HSPA9
MSTRG.43062	6.5	1.16992	0.99261	1.17863	0.238544	NA	PROMPT	PRMT9
MSTRG.19199	3.25	1.16992	1.41398	0.827398	0.408012	NA	PROMPT	PPIB
MSTRG.17707	3.25	1.16992	1.41398	0.827398	0.408012	NA	PROMPT	ITPK1
MSTRG.12842	3.25	1.16992	1.43751	0.813855	0.415728	NA	PROMPT	ATP5F1B
MSTRG.812	3.25	1.16992	1.43751	0.813855	0.415728	NA	PROMPT	PAFAH2
MSTRG.48799	17.75	1.15528	0.639906	1.80539	0.0710141	0.159208	PROMPT	MDN1
MSTRG.55734	7.25	1.152	0.954993	1.2063	0.227704	NA	PROMPT	TONSL
MSTRG.21087	7.25	1.152	0.94172	1.2233	0.221217	NA	PROMPT	XPO6
MSTRG.38062	8	1.1375	0.919453	1.23715	0.216031	NA	PROMPT	DCAF1
MSTRG.42022	4	1.1375	1.30276	0.87315	0.382582	NA	PROMPT	CNOT6L
MSTRG.22798	87.5	1.12553	0.312373	3.60317	0.000314364	0.00188628	PROMPT	RPL26
MSTRG.1267	13.5	1.12199	0.698681	1.60587	0.108303	0.220896	PROMPT	LSM10
MSTRG.3556	54	1.12199	0.386173	2.90541	0.00366775	0.0147073	PROMPT	GPATCH4
MSTRG.53324	4.75	1.11548	1.1587	0.962693	0.335702	NA	PROMPT	XRCC2
MSTRG.54579	4.75	1.11548	1.19287	0.93512	0.349726	NA	PROMPT	LRRCC1
MSTRG.42014	4.75	1.11548	1.16449	0.957914	0.338106	NA	PROMPT	CCNG2
MSTRG.1278	15	1.10962	0.664272	1.67044	0.0948329	0.199624	PROMPT	STK40
MSTRG.29763	11	1.09954	0.77684	1.41539	0.156953	0.291211	PROMPT	THADA
MSTRG.46598	11.75	1.09311	0.748443	1.46051	0.14415	0.273413	PROMPT	NHP2
MSTRG.55774	12.5	1.08746	0.723381	1.50331	0.13276	0.257235	PROMPT	ZNF250
MSTRG.6758	10	1.05445	0.836185	1.26102	0.207301	0.356934	PROMPT	SAR1A
MSTRG.28070	10	1.05445	0.808798	1.30372	0.192328	0.337754	PROMPT	HNRNPL
MSTRG.23836	10	1.05445	0.806944	1.30672	0.191308	0.336409	PROMPT	NR1D1
MSTRG.54891	11.5	1.04731	0.76364	1.37147	0.17023	0.309559	PROMPT	NIPAL2
MSTRG.34467	26	1.04182	0.520327	2.00224	0.0452587	0.111571	PROMPT	RBM39
MSTRG.14025	13.75	1.03953	0.691034	1.50431	0.132502	0.25688	PROMPT	PPP1CC
MSTRG.6822	21	1	0.57477	1.73983	0.0818896	0.177797	PROMPT	DNAJB12
MSTRG.44190	19.5	1	0.586616	1.70469	0.0882514	0.188819	PROMPT	MCIDAS
MSTRG.47754	9.75	1	0.810459	1.23387	0.217251	NA	PROMPT	MTCH1
MSTRG.44251	7.5	1	0.934148	1.07049	0.284397	NA	PROMPT	PLK2
MSTRG.49674	5.25	1	1.147	0.871837	0.383297	NA	PROMPT	MAP3K5
