# Supplementary material for: ZC3H4 restricts non-coding transcription in human cells
Source: eLife. 2021 Apr 29;10:e67305. doi: 10.7554/eLife.67305 (PMC8137146; doi:10.7554/eLife.67305)
Supplement: Supplementary file 7. [file elife-67305-supp7.xlsx]

## Sheet: Sheet1
	siRNAs used during this study
	Gene	Product number
	WDR82	s37247
	SETD1A	s18788
	SETD1B	s22961
	ZC3H4	s23292
	ZC3H6	s51769
	Scramble	4390843
	gRNAs used during this study
		Forward	Reverse
	ZC3H4	ACACTACTGGCAAAAGGGGG	CCCCCTTTTGCCAGTAGTGT
	CPSF30	GGGCACTTGGCCTTTCTCAG	CTGAGAAAGGCCAAGTGCCC
	Pol II	ACGTGCCCTCAGTTCTCCTC	GAGGAGAACTGAGGGCACGT
	PNUTS	CACCGGGCAGGCAAATGGTCCCTA	AAACTAGGGACCATTTGCCTGCCC
	qPCR primers used during this study
		Forward	Reverse		Forward	Reverse
	ZC3h6 mRNA	TTAGCGCATAAAATTGGGAGG	TGTCCCTGAGACATGTTAGG	MYC TSS	CCACCGGCCCTTTATAATGC	TATACTCAGCGCGATCCCTC
	SETD1A mRNA	TACAGGGAGTGAGGTGCCTT	AAGAGCATGGAGAAGCCTGG	MYC -2kb	AAGGAGGTGGCTGGAAACTT	AGTAAGTGTGCCCTCTACTGG
	SETD1B mRNA	TGGACACCAAAGGGGAAACC	AGCTGCAGGGTCTCATTCAC	MYC -4kb	TGTCATGGTTCACGCCTGTA	GCCTCAGCCTTCCAAAGTTC
	HMGA2 10 KB DS	CATGGGTTTCCTCTACCTGC	TTTGCAGAACATGCAGGTCC	MYC -8kb	CCTGCCAAACCTCTGTAAGC	AGTGGATCTGGGCATTGGAA
	ActB Spliced	CACAGAGCCTCGCCTTTG	ATGGAGGGGAAGACGGCC	ITPRID2 TSS	GTGTATGTTTCAGGGTGCCC	CGCGGAATGGGCAAGATTAG
	ITPRID2 5'	TCCCTCACCAAAGTCCAACT	AGGAATTGGGGTAAGGACGG	ITPRID2 -2kb	GAAGACCCATTATCCCTTGTGG	CTGGAAGGTATGTTTGGCTTACT
	ITPRID2 3'	TCAGAGGCTCAGTTTCCCAA	GCAGTTATTTCAGTGGAGCCA	ITPRID2 -4kb	ATCCTCCTGTTCGGTTGTGT	TTCTCAGCCCTGCCCTAAAA
	HMGA2 5'	CTCAGTGACTCCCCTGCATT	GGTTTTCTGTCAGGGCTTGG	ITPRID2 -8kb	CCCTGATCACAAACCAACAGA	CCTGATATGAGTGAAGACATTGC
	HMGA2 3'	CGAAACCCCGTCTCAAAACA	TGTTGAAAATGCATGCGACAG
	DLGAP1 SE	CTTGTCAGGAACCTTTGCCC	ATGCCTCATAGTGGTGGGTC
	MSRB3 SE	TCAAAGAGCAAGCCCAATGG	CCACCCACTTCCTCTTGACT
	MS2 UP	ACCCACTGCTTACTGGCTTA	GGTACCTTAGGATCCGAGCT
	MS2 Down	ACAACCACTACCTGAGCACC	GCTGAATAGAAGCGGTGATAATT
	BGH pA UC	GGACGAGCTGTACAAGTAATGAA	CCCCAGAATAGAATGACACCTAC
	ENO3	TGTCCTTGGCCGTGTGTAA	TCCCACAGGCAGAATCATGA
	NWD1	TGGTGGAGGCAAATTCAAGA	TAAGCAAGTGGTCTCCCTCC
	PJVK	TGTGCATGCTGGAATTCGAG	GCTATGGTTGTATGTGCTGGG
	RNU1-1 +500bp	TCTCTGGGAAGAAAGCAGGG	ACGGCAGGAGATAGTAGGGA
	Homology arms for CRISPR
	Pol II 5'	TACACCCCAACCAGTCCTTCTTACAGTCCCAGCTCCCCAGAGTATACCCCAACCTCTCCCAAGTACTCACCTACCAGTCCCAAATATTCACCCACCTCTCCCAAGTACTCGCCTACCAGTCCCACCTATTCACCCACCACCCCAAAATACTCCCCAACATCTCCTACTTATTCCCCAACCTCTCCAGTCTACACCCCAACCTCTCCCAAGTACTCACCTACTAGCCCCACTTACTCGCCCACTTCCCCCAAGTACTCGCCCACCAGCCCCACCTACTCGCCCACCTCCCCCAAAGGCTCAACCTACTCTCCCACTTCCCCTGGTTACTCGCCCACCAGCCCCACCTACAGTCTCACAAGCCCGGCTATCAGCCCGGATGACAGTGACGAGGAGAAC
	Pol II 3'	TGAGGGCACGTGGGGTGCGGCAGCGGGCTAGGGCCCAGGGCAGCTTGCCCGTGCTGCCGTGCAGTTCTTGCCTCCCTCACGGGGCGTCACCCCCAGCCCAGCTCCGTTGTACATAAATGCCTTGTGGCAGAGCTCCCGGTGAACTTCTGGATCCCGTTTCTGATGCAGATTCTTGTCTTGTTCTCCACTTGTGCTGTTAGAACTCACTGGCCCAGTGGTGTTCTCACTCCTACCCCACCCACCCCCTGCCTGTCCCCAAATTGAAGATCCTTCCTTGCCTGTGGCTTGATGCGGGGCGGGTAAAGGGTATTTTAACTTAGGGGTAGTTCCTGCTGTGAGTGGTTACAGCTGATCCTCGGGAAGAACAAAGCT
	CPSF30 5'	AGCTCAGGTGCCACGGGCTTCTCTTTGTCCTGCTACCCACTTGGGAGTCCCTCCCTGGGCAGGCCATGTGTCCAGGTGGGAGAGTTGTGGGCCTGAAAGAGCAGGTCGCTAGCAGGTCGCCTTCTGGCGGCCTTGTTCTCCCTTGCATCTGCGGAGTTGCTGGCTAGTTTCTGCACCACTGCACTTTCCATCCTGAGCTCCCTCACCCTCTAATTTGAAAGAAACTCTGTACCACTGAGAATTTCAGAGTCATGTCCCGACTGGGGACTTGGTGGATGATTTGGGATTTGGTGGGCACTCCCTTAGTTGAAAACTGCATTTGAACAGTGTTGTTGTCTGTCTCTCCTCTTCCCCCACTTCCTGCTGTTCCCAGTGTGGCGAGAAAGGACACTACGCCAA…
	CPSF30 3'	GCTGTTGGGAGTGTGCATTTAACTGTTTCATGCGCTTGTTGGCGCGACTGTGGCTCGAGCTGGCCCGCAGACACGTGGGTTTCATCACTCTGAGGGGCCACGTCTGTTAGTTTCCTATCATTTTGCCTTAGTATTTTTTGAAAAAGGGACATGTGTCCTGTGGGTCCCTGCAGTCGACATCATGTTTGGCTGGGCATCGATGCCTCCTTTCTGGGACTCCCGGCACAACTCCCCTCATCCAGGGAGGGAGGCAGCTGCTGGGGAGGGGCTTGGCTAGGTAGTTCTGTGTGGCGGTGGTCATTCCCCTCATTAAACACCAGTTCTTGGTGACGCCAGGGGCTGGTAGGTCATTCAAAGCTGTGGCCAGCTCACGCCTGCTTCCTC
	PNUTS 5'	GAAACAGCTATGACCATGATTACGAGTGGGTGAGAGTCACTACTGTTGGTAGCTAGGCAGAACGTGAGGTACCCGTCTCTTTGATGTCCTAGTATGCATAGCAGTTCCTACTCTATGCCCTTCCCCCAAATCCCCAAGATTGTCTCTGAAAGACAGTTCTCAGGATGTCATGGACAAGGGGTGGTGAGGGTGGCATTGCCCTCAGCTATTTCCTGTCTAACTGTTTTGCCATCGTTCCCACAGACATGTCAAACCGCCCTGTCTGCCGACATTTCATGATGAAGGGCAACTGCCGCTATGAGAACAACTGTGCCTTCTACCACCCGGGTGTCAATGGGCCCCCCCTGCCC
	PNUTS 3'	GGACCATTTGCCTGCCCTGTTCACACAACCCCTGTGGACTGCAGCCTCGCTCTTTCCACCCTGTTATGGCTTCTGTGAGGCCCATTTTCCCTTTTCCCCAGCTGATGAGGAGCCGGCCCCCTCAGTTCCCACTTGCTTGGGTTCCTGGGGGTTTTCTGATCACTGGTGCGCATTGATGTACATATTTTCCTCCAGTCTGGGGAGGAGAGAGACTGGAAACGTTCCTGGACTGCTGAAGAGGAGACCCAGTTGGCTTCACTTTTTGAGAAGATTCGCCCTGTACCCCAAACCCCTTTCCAGTATTACCCTTAATGCTTGAGAACCTAAAGCTGGTTATCCTGGCGAACACCCCTACCCTTCTATTGTACGCATCTGTGCGGTATTTCACA
