# Supplementary figures and images for: ZC3H4 restricts non-coding transcription in human cells
Source: eLife journal article supplement (doi:10.7554/elife.67305), 2021-04-29

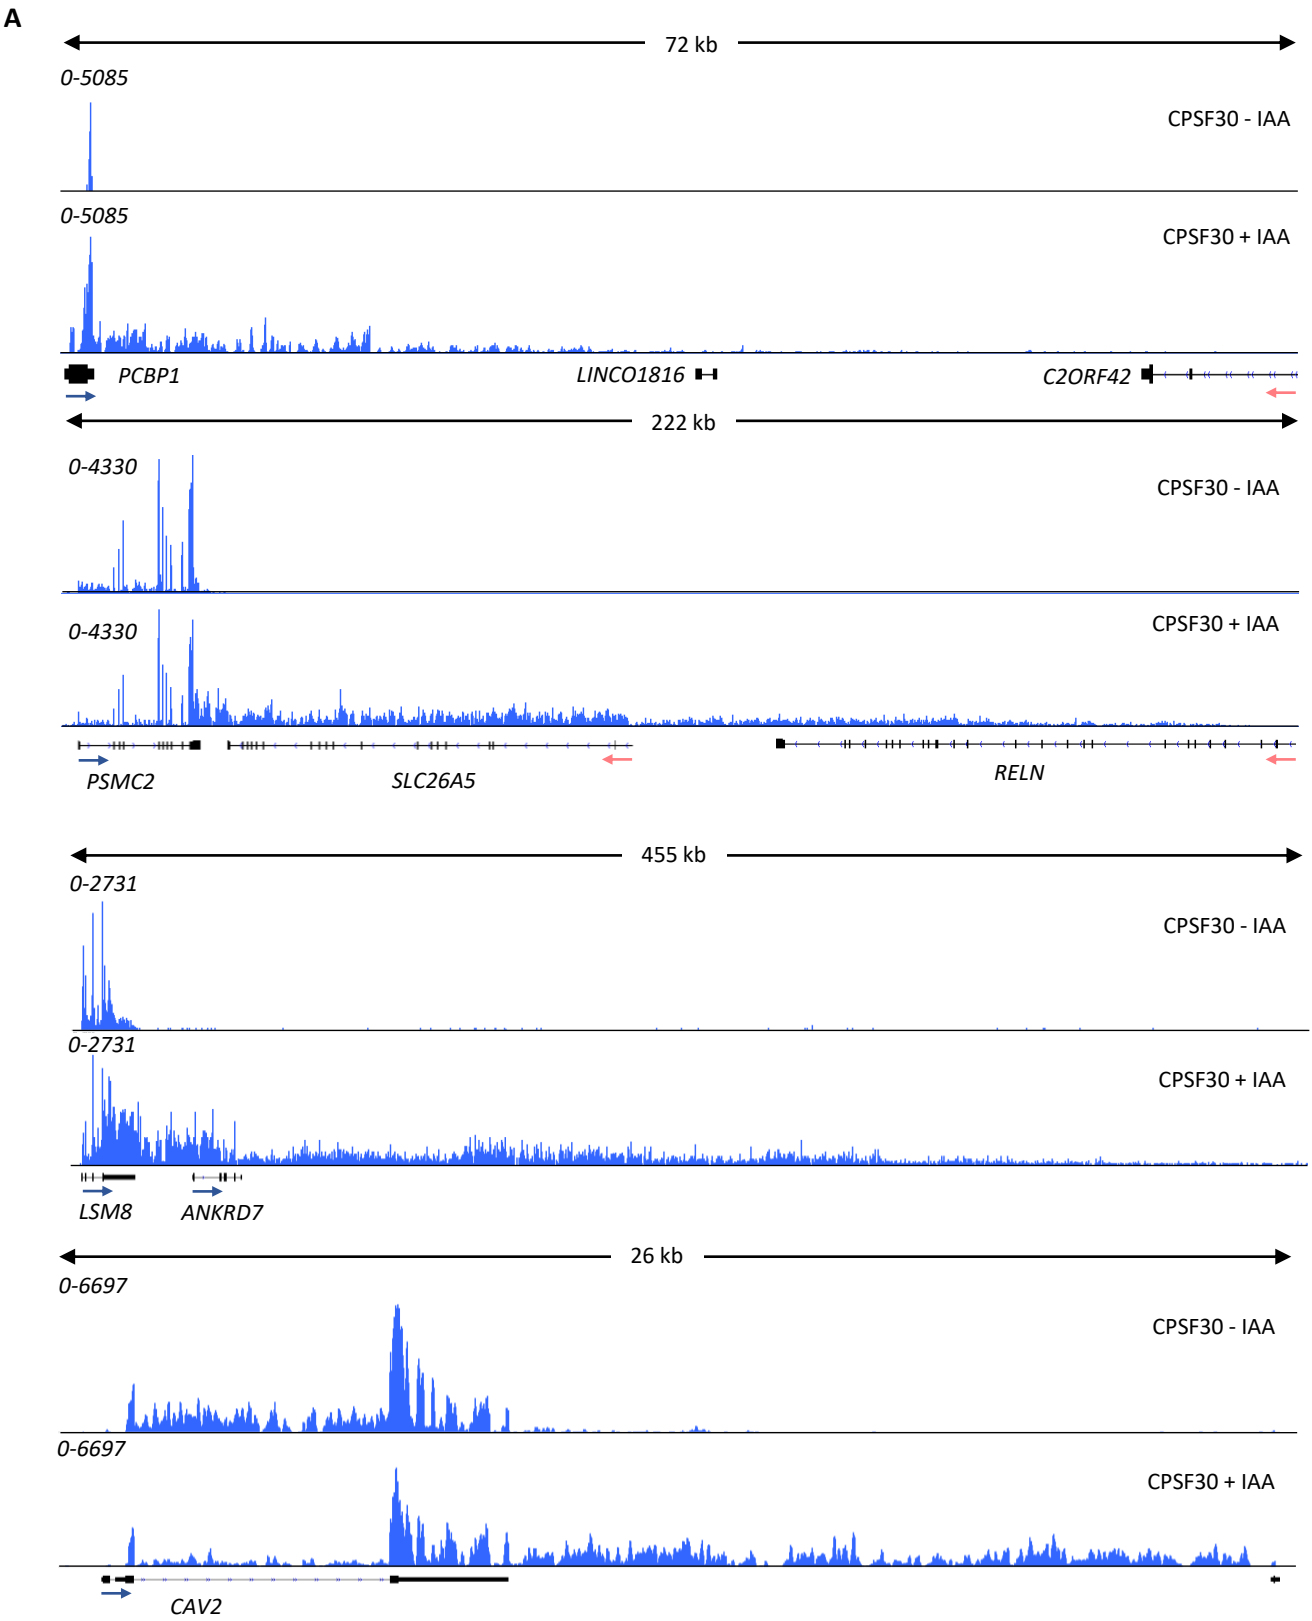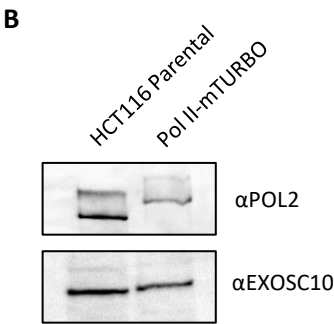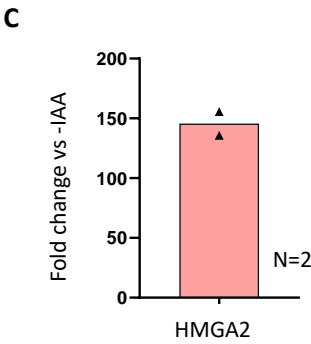

Supplement: supp [file elife_poa_e67305_Figure_1_figure_supplement_1.pdf › elife_poa_e67305_Figure_1_figure_supplement_1.pdf]

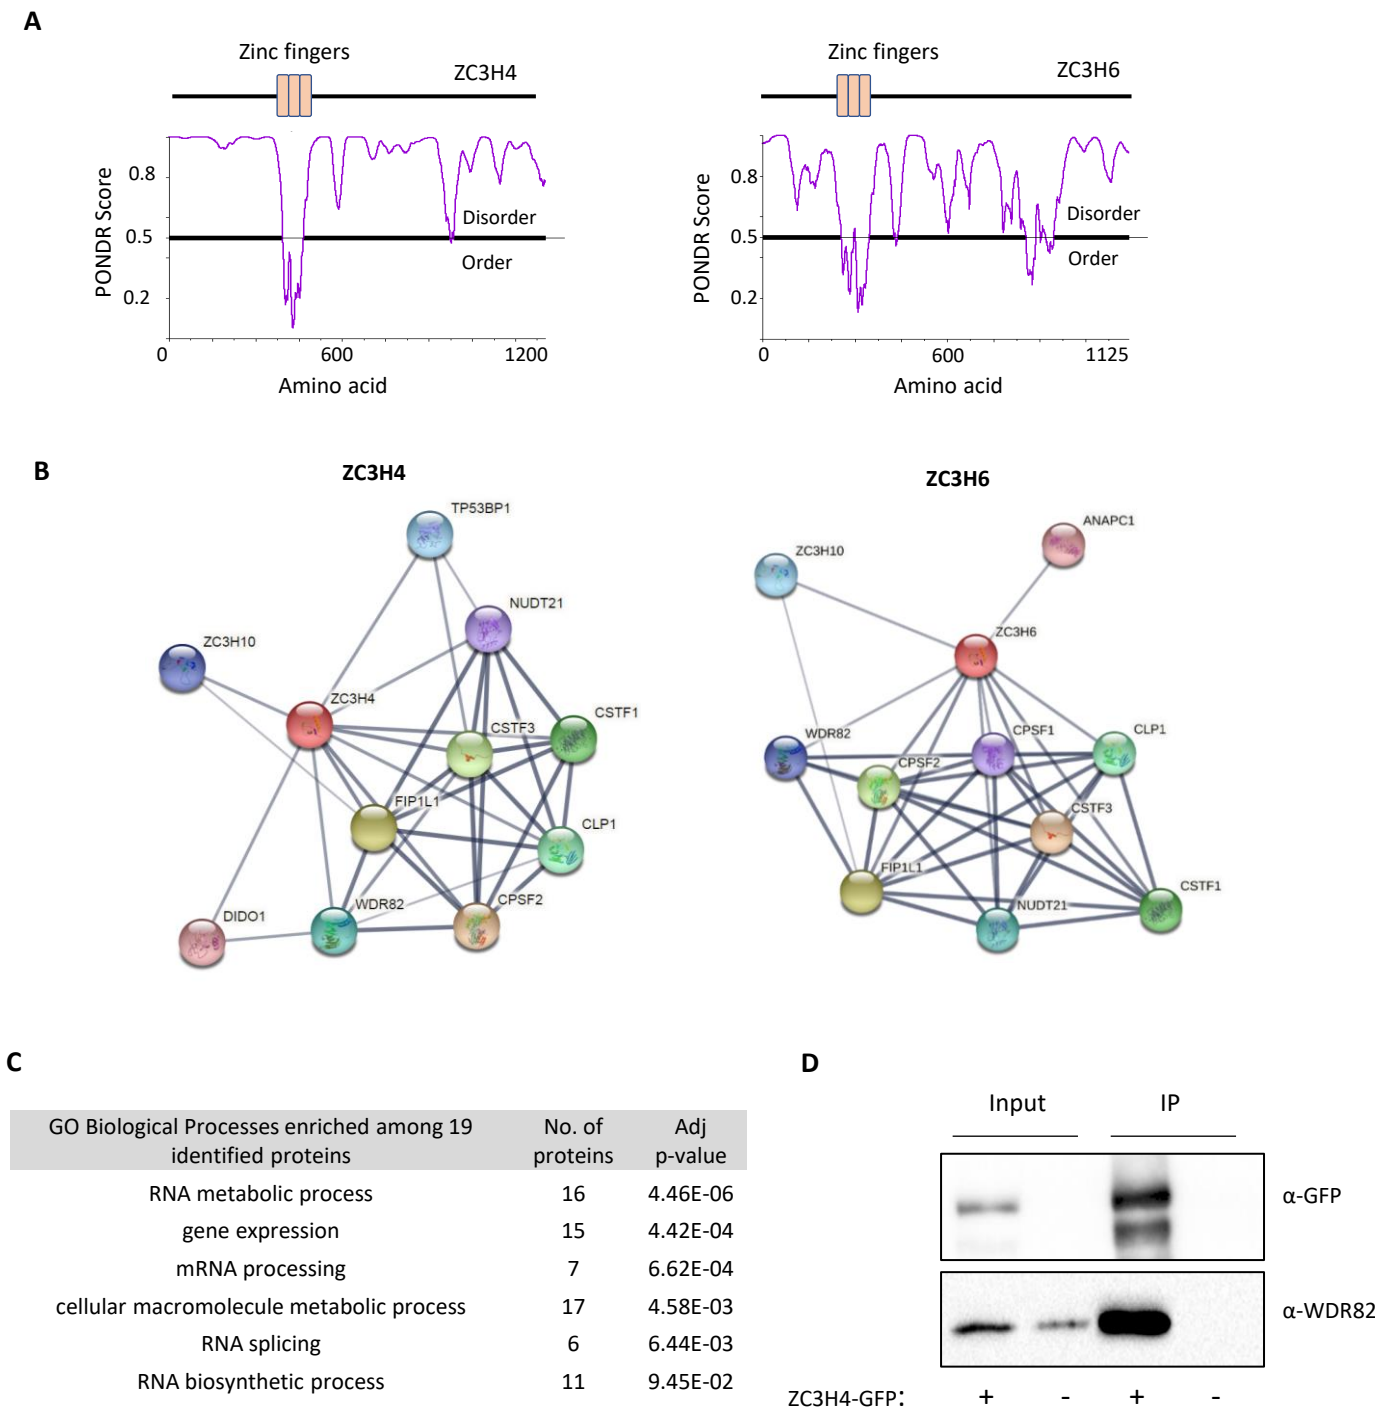

Supplement: supp [file elife_poa_e67305_Figure_1_figure_supplement_2.pdf › elife_poa_e67305_Figure_1_figure_supplement_2.pdf]

A

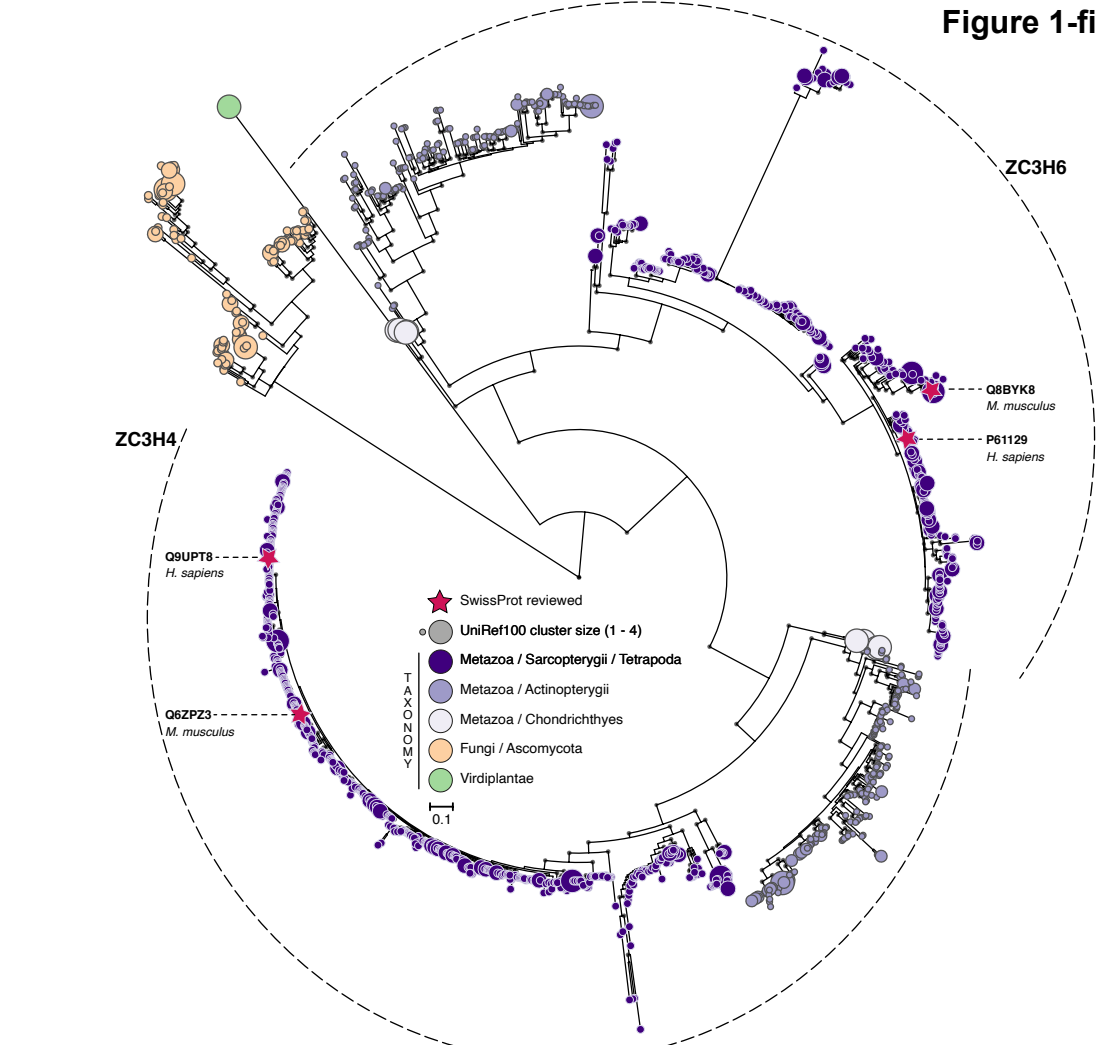

B

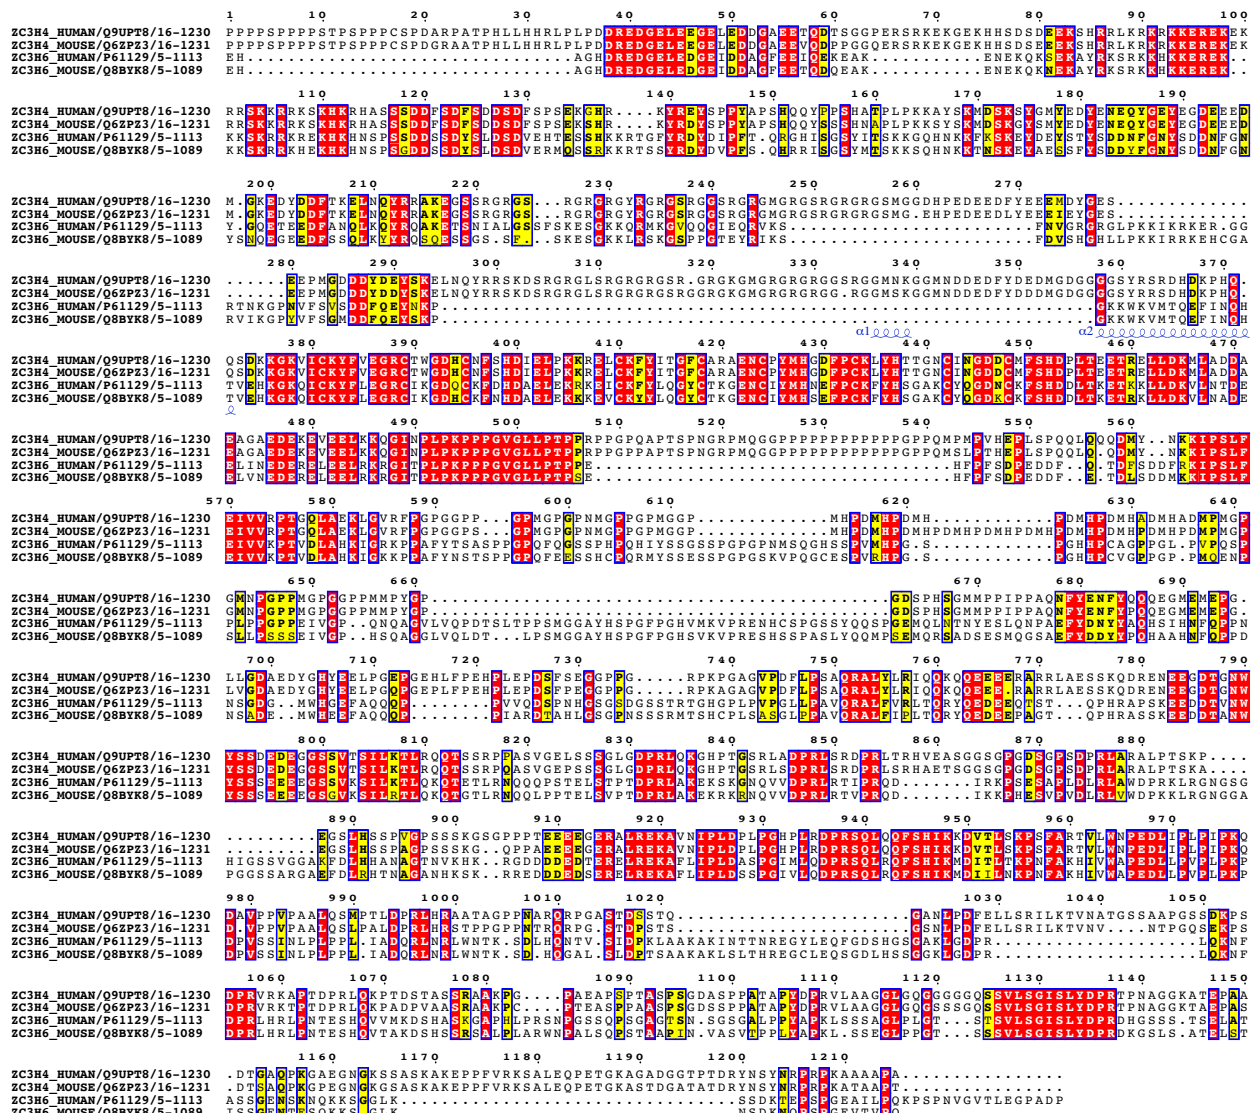

Supplement: supp [file elife_poa_e67305_Figure_1_figure_supplement_3.pdf › elife_poa_e67305_Figure_1_figure_supplement_3.pdf]

Figure 2-figure supplement 1

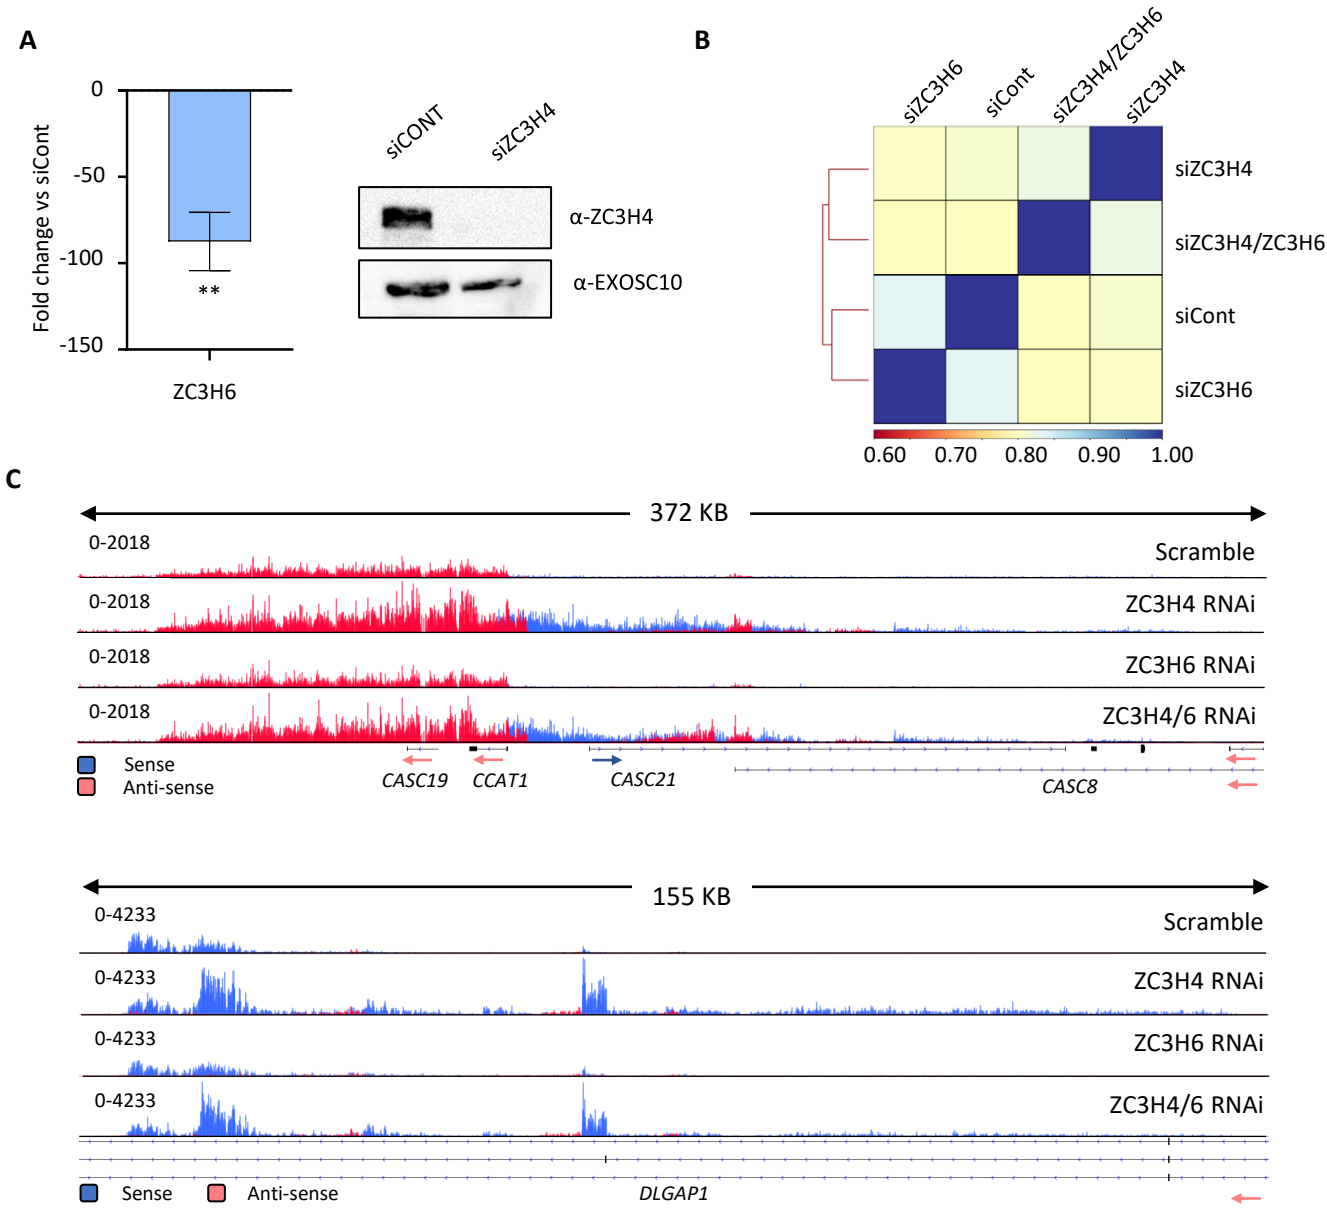

Supplement: supp [file elife_poa_e67305_Figure_2_figure_supplement_1.pdf › elife_poa_e67305_Figure_2_figure_supplement_1.pdf]

Figure 2-figure supplement 2

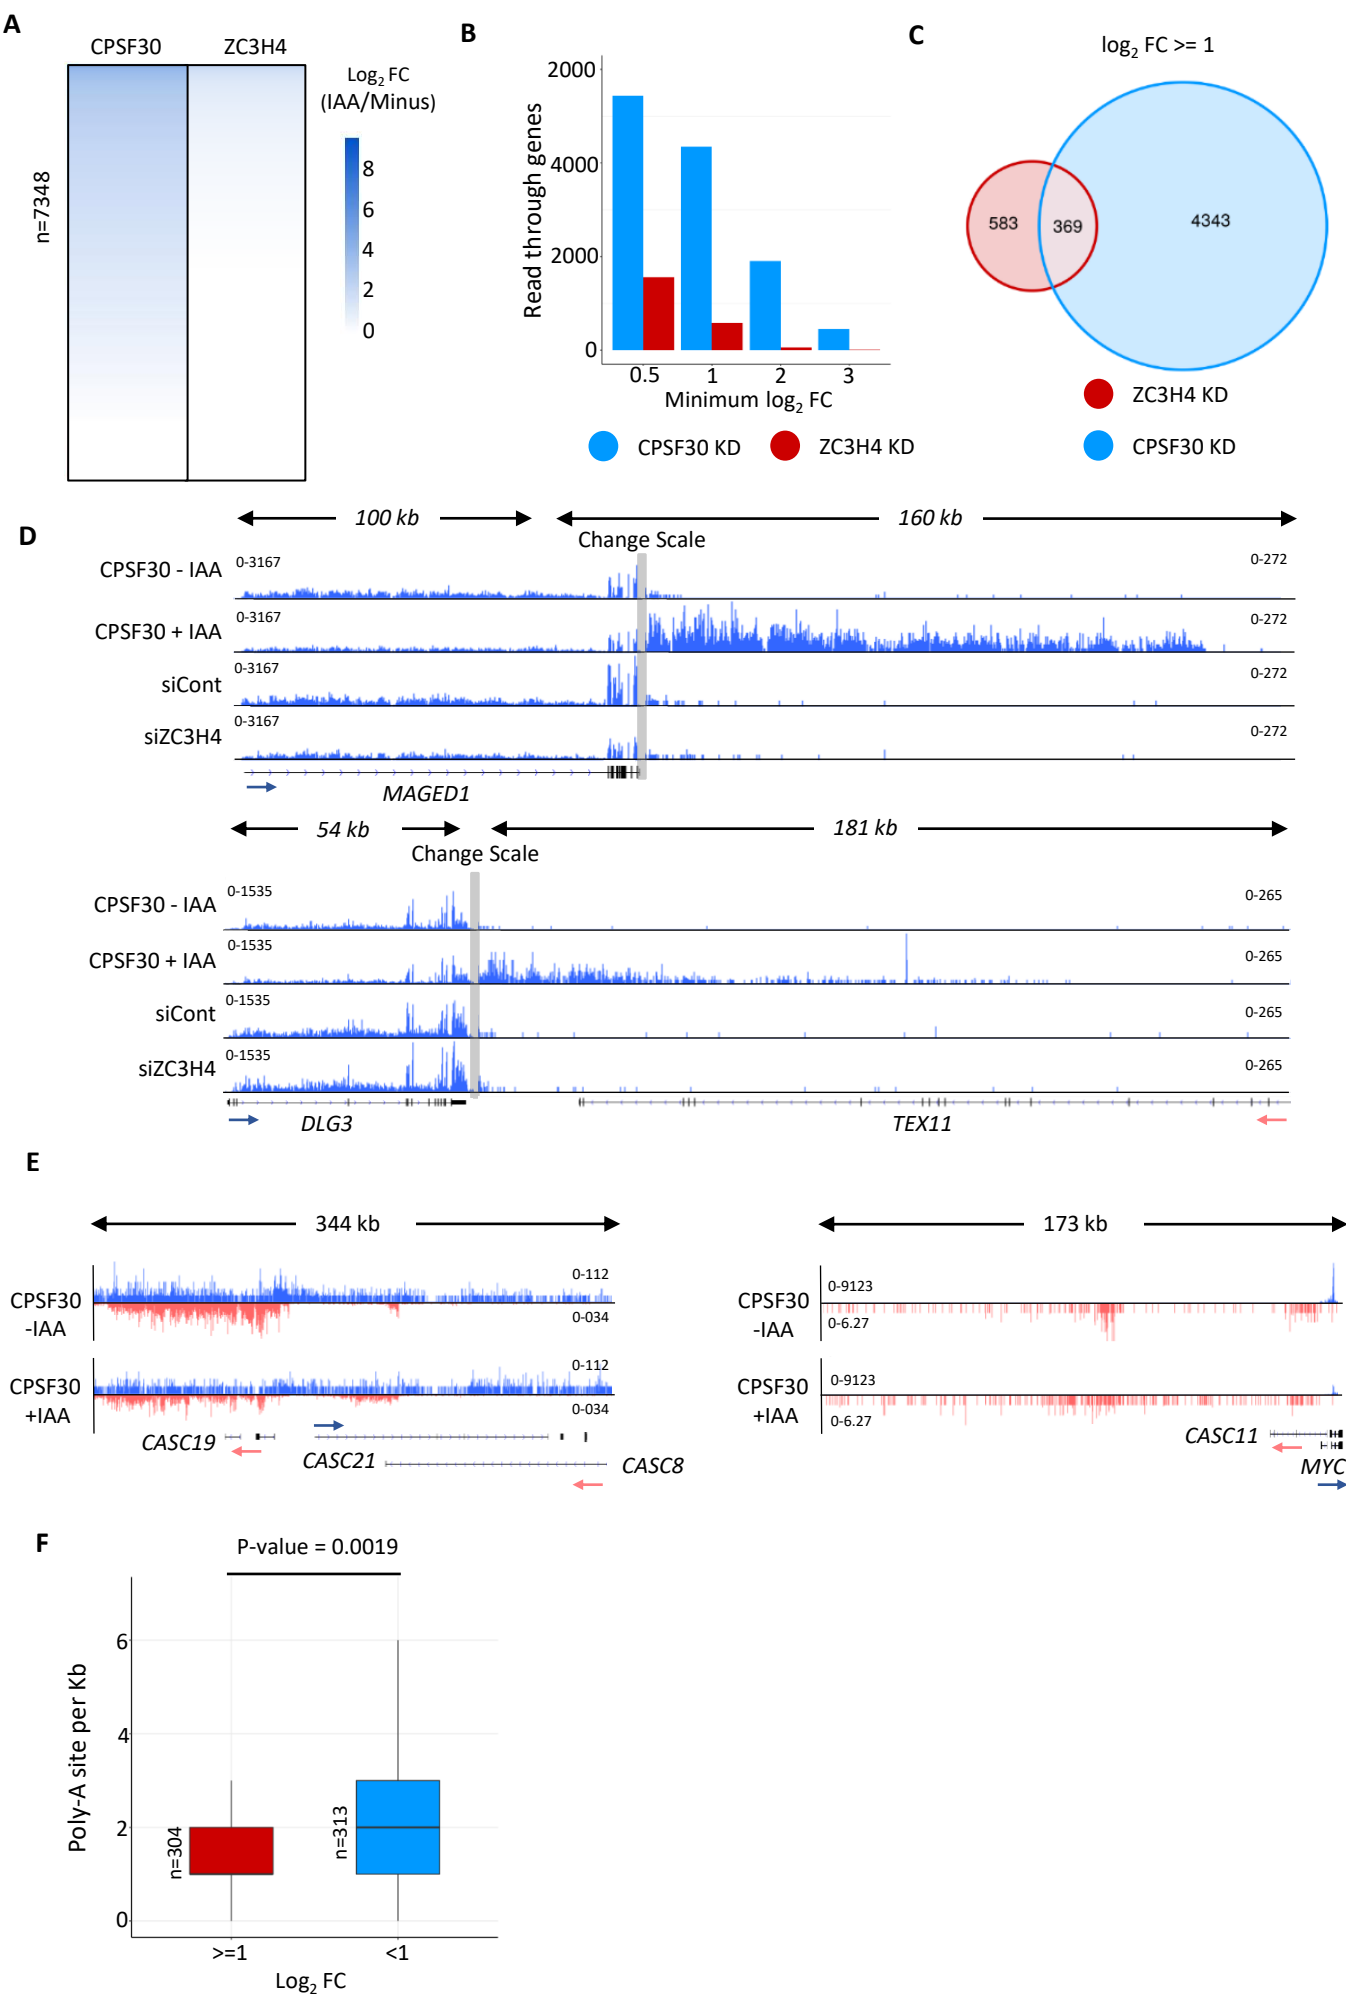

Supplement: supp [file elife_poa_e67305_Figure_2_figure_supplement_2.pdf › elife_poa_e67305_Figure_2_figure_supplement_2.pdf]

Figure 3-figure supplement 1

A

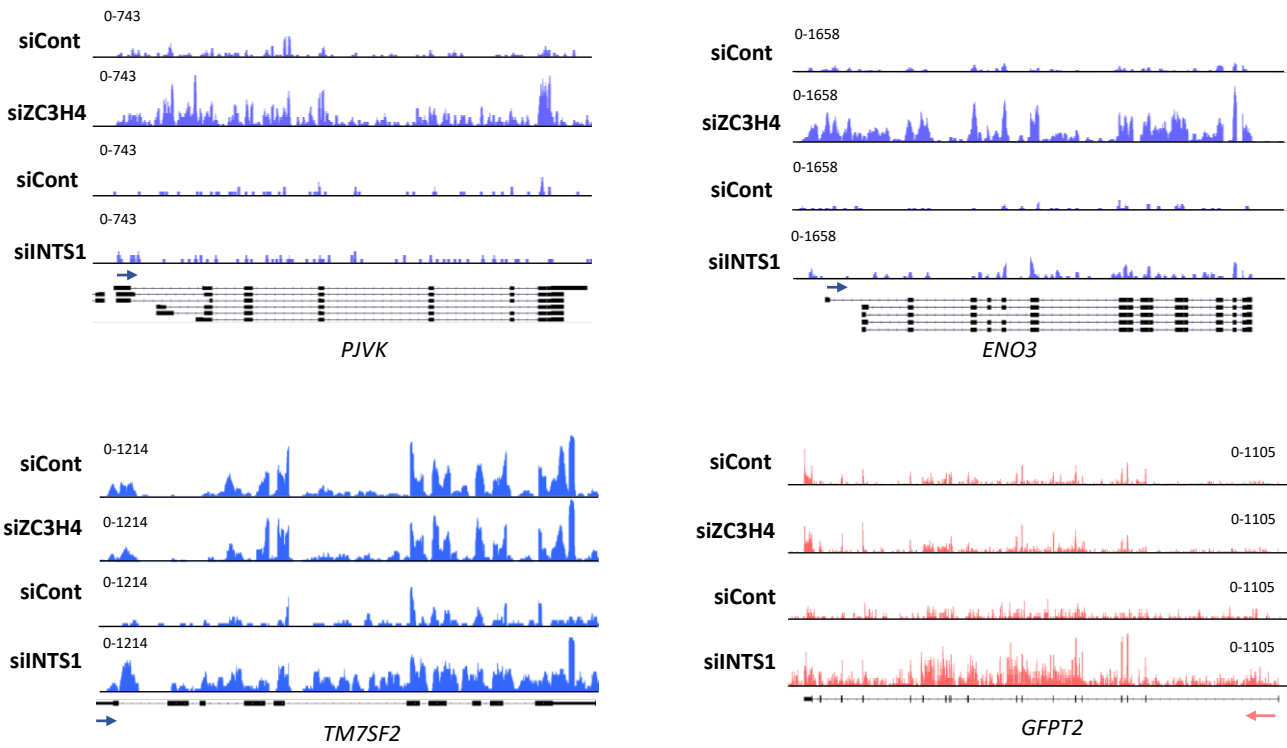

B

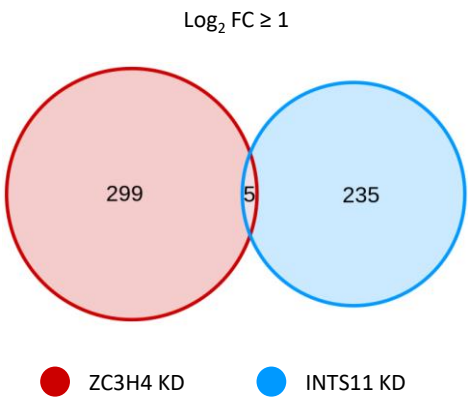

Upregulated mRNAs (HeLa)

C

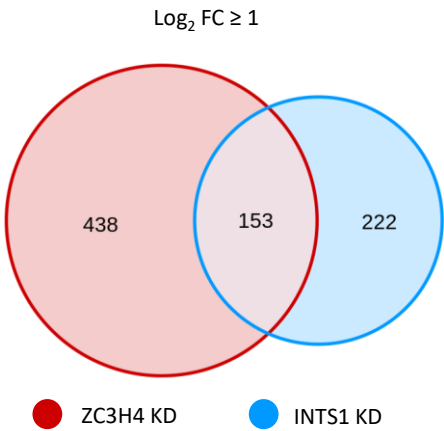

Upregulated PROMPTs (HCT116)

D

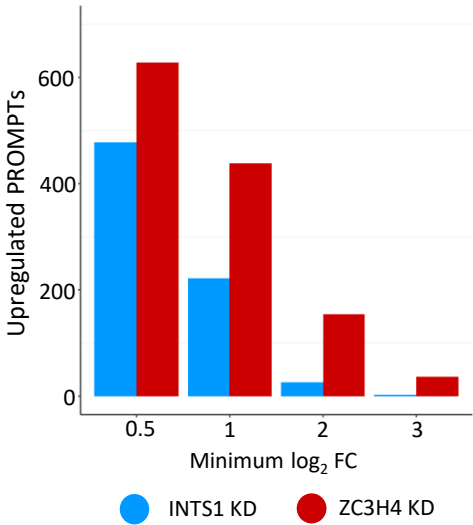

Supplement: supp [file elife_poa_e67305_Figure_3_figure_supplement_1.pdf › elife_poa_e67305_Figure_3_figure_supplement_1.pdf]

Figure 4-figure supplement 1

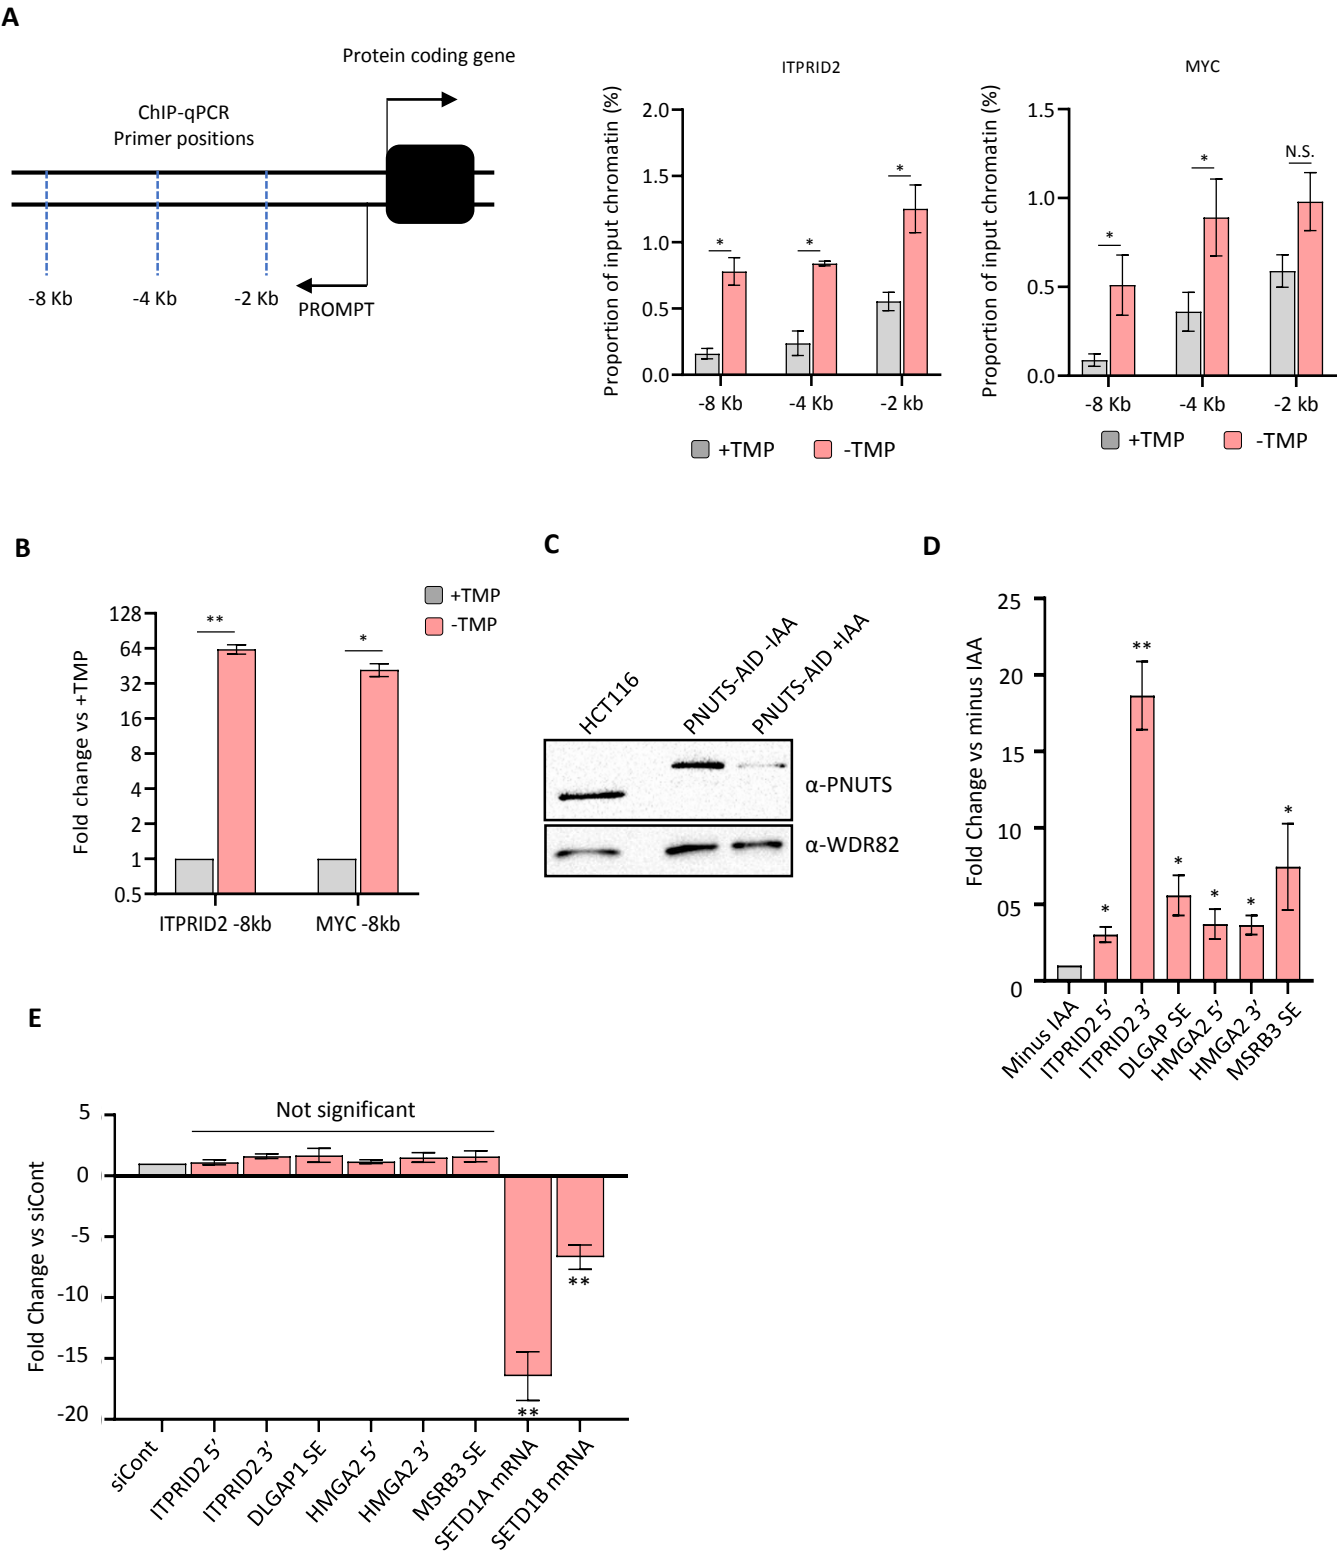

Supplement: supp [file elife_poa_e67305_Figure_4_figure_supplement_1.pdf › elife_poa_e67305_Figure_4_figure_supplement_1.pdf]

**A**

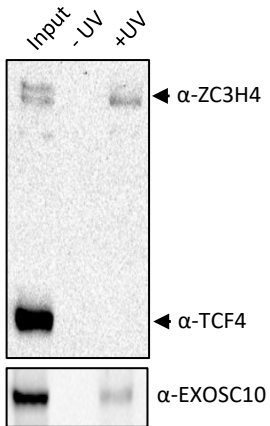

**B**

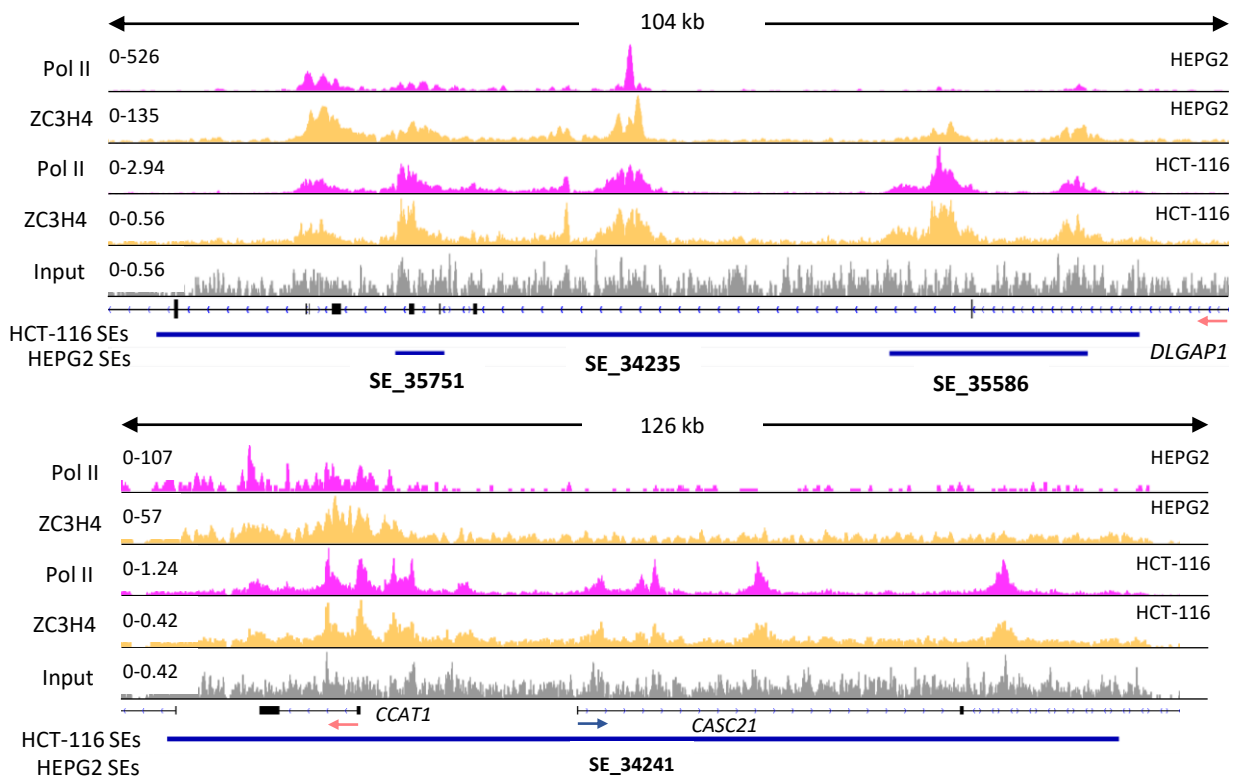

Supplement: supp [file elife_poa_e67305_Figure_5_figure_supplement_1.pdf › elife_poa_e67305_Figure_5_figure_supplement_1.pdf]

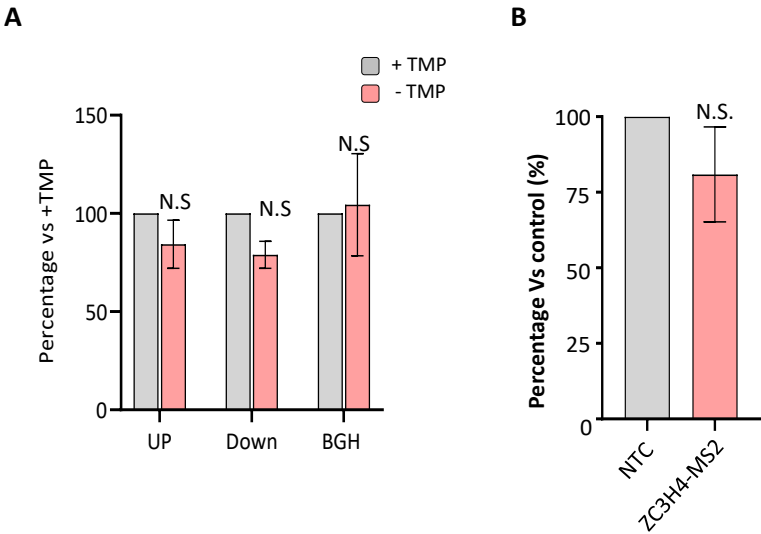

Supplement: supp [file elife_poa_e67305_Figure_6_figure_supplement_1.pdf › elife_poa_e67305_Figure_6_figure_supplement_1.pdf]
